# Supplementary material
Source: MDPI journal article supplement (https://www.mdpi.com/2304-6740/10/4/41)
Supplement: s1 [file s1]

Archive with 9 entries (9 files):
- 1DyCr.cif
- 1_checkcif.pdf
- 2dyfe.cif
- 2_checkcif.pdf
- 3HoCr.cif
- 3_checkcif.pdf
- 4HoFe.cif
- 4_checkcif.pdf
- ESI_INORGANICS_revized.pdf
