# Supplementary material
Source: MDPI journal article supplement (https://www.mdpi.com/2304-6740/10/4/41)
Supplement: s1 [file s1 › 1DyCr.cif]

 
data_1DyCr
 
_audit_creation_method            'SHELXL-2016/6'
_shelx_SHELXL_version_number      '2016/6'
_chemical_name_systematic         ?
_chemical_name_common             ?
_chemical_melting_point           ?
_chemical_formula_moiety          
 'C17 H19 Dy Cr N13 O4, 3(H2 O)'
_chemical_formula_sum
 'C17 H25 Cr Dy N13 O7' 
_chemical_formula_weight          738.00

loop_
 _atom_type_symbol
 _atom_type_description
 _atom_type_scat_dispersion_real
 _atom_type_scat_dispersion_imag
 _atom_type_scat_source
 'C'  'C'   0.0033   0.0016
 'International Tables Vol C Tables 4.2.6.8 and 6.1.1.4'
 'Cr'  'Cr'   0.3209   0.6236
 'International Tables Vol C Tables 4.2.6.8 and 6.1.1.4'
 'H'  'H'   0.0000   0.0000
 'International Tables Vol C Tables 4.2.6.8 and 6.1.1.4'
 'Dy'  'Dy'  -0.1892   4.4098
 'International Tables Vol C Tables 4.2.6.8 and 6.1.1.4'
 'N'  'N'   0.0061   0.0033
 'International Tables Vol C Tables 4.2.6.8 and 6.1.1.4'
 'O'  'O'   0.0106   0.0060
 'International Tables Vol C Tables 4.2.6.8 and 6.1.1.4'
 
_space_group_crystal_system       monoclinic
_space_group_IT_number            14
_space_group_name_H-M_alt         'P 21/c'
_space_group_name_Hall            '-P 2ybc'
 
_shelx_space_group_comment
;
The symmetry employed for this shelxl refinement is uniquely defined
by the following loop, which should always be used as a source of
symmetry information in preference to the above space-group names.
They are only intended as comments.
;
 
loop_
 _space_group_symop_operation_xyz
 'x, y, z'
 '-x, y+1/2, -z+1/2'
 '-x, -y, -z'
 'x, -y-1/2, z-1/2'
 
_cell_length_a                    12.84505(12)
_cell_length_b                    12.79181(10)
_cell_length_c                    17.18315(16)
_cell_angle_alpha                 90
_cell_angle_beta                  103.3953(9)
_cell_angle_gamma                 90
_cell_volume                      2746.58(4)
_cell_formula_units_Z             4
_cell_measurement_temperature     150(1)
_cell_measurement_reflns_used     18746
_cell_measurement_theta_min       1.9990
_cell_measurement_theta_max       32.7620
 
_exptl_crystal_description        needle
_exptl_crystal_colour             yellow
_exptl_crystal_density_meas       ?
_exptl_crystal_density_method     ?
_exptl_crystal_density_diffrn     1.785          
_exptl_crystal_F_000              1456
_exptl_transmission_factor_min    ?
_exptl_transmission_factor_max    ?
_exptl_crystal_size_max           0.355
_exptl_crystal_size_mid           0.076
_exptl_crystal_size_min           0.049
_exptl_absorpt_coefficient_mu     3.156
_shelx_estimated_absorpt_T_min    0.400
_shelx_estimated_absorpt_T_max    0.861
_exptl_absorpt_correction_T_min   0.72787
_exptl_absorpt_correction_T_max   1.00000
_exptl_absorpt_correction_type    multi-scan
_exptl_absorpt_process_details
;
CrysAlisPro 1.171.38.46 (Rigaku Oxford Diffraction, 2015)
Empirical absorption correction using spherical harmonics,
 implemented in SCALE3 ABSPACK scaling algorithm.
;
_oxdiff_exptl_absorpt_empirical_full_min           0.886
_oxdiff_exptl_absorpt_empirical_full_max           1.270
_oxdiff_exptl_absorpt_empirical_details
;
Empirical correction (ABSPACK) includes:
- Absorption correction using spherical harmonics
- Frame scaling
;
_diffrn_ambient_temperature       150(1)
_diffrn_ambient_environment       'N~2~'
_diffrn_source                    'fine-focus sealed X-ray tube'
_diffrn_source_type               'Enhance (Mo) X-ray Source'
_diffrn_radiation_probe           x-ray
_diffrn_radiation_type            'Mo K\a'
_diffrn_radiation_wavelength      0.71073
_diffrn_radiation_monochromator   graphite
_diffrn_measurement_device        'four-circle diffractometer'
_diffrn_measurement_device_type   'Xcalibur, AtlasS2, Gemini'
_diffrn_detector                  'CCD plate'
_diffrn_detector_type             'AtlasS2'
_diffrn_detector_area_resol_mean  10.4566
_diffrn_reflns_number             35374
_diffrn_reflns_av_unetI/netI      0.0201
_diffrn_reflns_av_R_equivalents   0.0196
_diffrn_reflns_limit_h_min        -19
_diffrn_reflns_limit_h_max        19
_diffrn_reflns_limit_k_min        -18
_diffrn_reflns_limit_k_max        18
_diffrn_reflns_limit_l_min        -24
_diffrn_reflns_limit_l_max        25
_diffrn_reflns_theta_min          2.005
_diffrn_reflns_theta_max          32.923
_diffrn_reflns_theta_full         31.200
_diffrn_measured_fraction_theta_max   0.910
_diffrn_measured_fraction_theta_full  0.991
_diffrn_reflns_Laue_measured_fraction_max    0.910
_diffrn_reflns_Laue_measured_fraction_full   0.991
_diffrn_reflns_point_group_measured_fraction_max   0.910
_diffrn_reflns_point_group_measured_fraction_full  0.991
_reflns_number_total              9358
_reflns_number_gt                 8567
_reflns_threshold_expression      'I > 2\s(I)'
_reflns_Friedel_coverage          0.000
_reflns_Friedel_fraction_max      .
_reflns_Friedel_fraction_full     .
 
_reflns_special_details
;
 Reflections were merged by SHELXL according to the crystal
 class for the calculation of statistics and refinement.
 
 _reflns_Friedel_fraction is defined as the number of unique
 Friedel pairs measured divided by the number that would be
 possible theoretically, ignoring centric projections and
 systematic absences.
;
 
_computing_data_collection       'CrysAlisPro 1.171.38.46 (Rigaku OD, 2015)'
_computing_cell_refinement       'CrysAlisPro 1.171.38.46 (Rigaku OD, 2015)'
_computing_data_reduction        'CrysAlisPro 1.171.38.46 (Rigaku OD, 2015)'
_computing_structure_solution    'SHELXS-97 (Sheldrick, 2008)'
_computing_structure_refinement  'SHELXL-2016/6 (Sheldrick, 2016)'
_computing_molecular_graphics    'DIAMOND 3.1 (Crystal Impact GbR 2005)'
_computing_publication_material  'WinGX publication routines (Farrugia, 1999)'

_refine_special_details           ?
_refine_ls_structure_factor_coef  Fsqd
_refine_ls_matrix_type            full
_refine_ls_weighting_scheme       calc
_refine_ls_weighting_details
'w=1/[\s^2^(Fo^2^)+(0.0152P)^2^+1.4013P] where P=(Fo^2^+2Fc^2^)/3'
_atom_sites_solution_primary      direct
_atom_sites_solution_secondary    difmap
_atom_sites_solution_hydrogens    mixed
_refine_ls_hydrogen_treatment     mixed
_refine_ls_extinction_method      none
_refine_ls_extinction_coef        .
_refine_ls_number_reflns          9358
_refine_ls_number_parameters      402
_refine_ls_number_restraints      28
_refine_ls_R_factor_all           0.0195
_refine_ls_R_factor_gt            0.0159
_refine_ls_wR_factor_ref          0.0373
_refine_ls_wR_factor_gt           0.0362
_refine_ls_goodness_of_fit_ref    1.006
_refine_ls_restrained_S_all       1.005
_refine_ls_shift/su_max           0.006
_refine_ls_shift/su_mean          0.000
 
loop_
 _atom_site_label
 _atom_site_type_symbol
 _atom_site_fract_x
 _atom_site_fract_y
 _atom_site_fract_z
 _atom_site_U_iso_or_equiv
 _atom_site_adp_type
 _atom_site_occupancy
 _atom_site_site_symmetry_order  
 _atom_site_calc_flag
 _atom_site_refinement_flags_posn
 _atom_site_refinement_flags_adp
 _atom_site_refinement_flags_occupancy
 _atom_site_disorder_assembly
 _atom_site_disorder_group
Dy1 Dy 0.68522(2) 0.61087(2) 0.20586(2) 0.00928(2) Uani 1 1 d . . . . .
N5 N 0.85922(9) 0.51690(8) 0.26295(7) 0.0124(2) Uani 1 1 d . . . . .
N6 N 0.63330(9) 0.76013(8) 0.28916(7) 0.0130(2) Uani 1 1 d . . . . .
N7 N 0.75261(9) 0.60564(8) 0.35540(7) 0.0136(2) Uani 1 1 d . . . . .
O1 O 0.78164(8) 0.55758(8) 0.11364(6) 0.01648(19) Uani 1 1 d . . . . .
O2 O 0.59972(8) 0.75701(7) 0.13445(6) 0.01555(18) Uani 1 1 d . . . . .
O3 O 0.82659(8) 0.73133(8) 0.22005(8) 0.0204(2) Uani 1 1 d . . . . .
H3WA H 0.8177(16) 0.7899(17) 0.2223(13) 0.031 Uiso 1 1 d . U . . .
H3WB H 0.8849(17) 0.7222(16) 0.2408(13) 0.031 Uiso 1 1 d . U . . .
O4 O 0.57032(8) 0.54566(8) 0.08846(6) 0.0179(2) Uani 1 1 d D . . . .
H4WA H 0.5149(12) 0.5678(15) 0.0679(11) 0.027 Uiso 1 1 d D U . . .
H4WB H 0.5910(15) 0.5036(13) 0.0613(11) 0.027 Uiso 1 1 d D U . . .
C1 C 0.87250(11) 0.51697(10) 0.13101(9) 0.0159(2) Uani 1 1 d . . . . .
C2 C 0.55855(11) 0.83037(10) 0.16481(8) 0.0148(2) Uani 1 1 d . . . . .
C3 C 0.97808(12) 0.41277(12) 0.36732(10) 0.0221(3) Uani 1 1 d . . . . .
H3A H 0.963108 0.343797 0.342411 0.033 Uiso 1 1 calc R U . . .
H3B H 0.988313 0.406132 0.425419 0.033 Uiso 1 1 calc R U . . .
H3C H 1.043139 0.441453 0.354958 0.033 Uiso 1 1 calc R U . . .
C4 C 0.88635(10) 0.48411(10) 0.33564(8) 0.0138(2) Uani 1 1 d . . . . .
C5 C 0.81838(10) 0.52704(10) 0.38775(8) 0.0140(2) Uani 1 1 d . . . . .
C6 C 0.82481(12) 0.49192(11) 0.46530(9) 0.0193(3) Uani 1 1 d . . . . .
H6 H 0.868361 0.433700 0.486084 0.023 Uiso 1 1 calc R U . . .
C7 C 0.76586(12) 0.54419(12) 0.51169(9) 0.0216(3) Uani 1 1 d . . . . .
H7 H 0.765360 0.519327 0.563696 0.026 Uiso 1 1 calc R U . . .
C8 C 0.70790(12) 0.63258(12) 0.48185(9) 0.0200(3) Uani 1 1 d . . . . .
H8 H 0.672517 0.672703 0.514488 0.024 Uiso 1 1 calc R U . . .
C9 C 0.70275(10) 0.66120(10) 0.40285(8) 0.0148(2) Uani 1 1 d . . . . .
C10 C 0.64384(10) 0.75504(10) 0.36533(8) 0.0143(2) Uani 1 1 d . . . . .
C11 C 0.60294(12) 0.83434(12) 0.41509(9) 0.0224(3) Uani 1 1 d . . . . .
H11A H 0.600839 0.903232 0.389819 0.034 Uiso 1 1 calc R U . . .
H11B H 0.650521 0.836876 0.468626 0.034 Uiso 1 1 calc R U . . .
H11C H 0.530712 0.814788 0.419367 0.034 Uiso 1 1 calc R U . . .
N1 N 0.92852(12) 0.49900(13) 0.07671(9) 0.0279(3) Uani 1 1 d . . . . .
H1A H 0.9012(17) 0.5175(16) 0.0284(14) 0.034 Uiso 1 1 d . U . . .
H1B H 0.9884(17) 0.4704(16) 0.0880(13) 0.034 Uiso 1 1 d . U . . .
N2 N 0.49690(12) 0.90269(10) 0.12135(9) 0.0251(3) Uani 1 1 d . . . . .
H2A H 0.4750(17) 0.8936(15) 0.0713(14) 0.030 Uiso 1 1 d . U . . .
H2B H 0.4715(16) 0.9481(16) 0.1452(13) 0.030 Uiso 1 1 d . U . . .
N3 N 0.91694(9) 0.48827(9) 0.20864(7) 0.0159(2) Uani 1 1 d . . . . .
H3 H 0.9724(14) 0.4570(14) 0.2220(11) 0.019 Uiso 1 1 d . U . . .
N4 N 0.57716(9) 0.84006(9) 0.24635(7) 0.0145(2) Uani 1 1 d . . . . .
H4 H 0.5467(15) 0.8821(13) 0.2672(12) 0.017 Uiso 1 1 d . U . . .
Cr1 Cr 0.72131(2) 0.17335(2) 0.23577(2) 0.01068(4) Uani 1 1 d . . . . .
C12 C 0.67694(10) 0.32992(10) 0.23278(8) 0.0145(2) Uani 1 1 d . . . . .
C13 C 0.42148(11) 0.61975(10) 0.24272(9) 0.0144(2) Uani 1 1 d . . . . .
C14 C 0.77752(11) 0.02242(10) 0.23898(9) 0.0165(3) Uani 1 1 d . . . . .
C15 C 0.86785(11) 0.21224(11) 0.21323(9) 0.0179(3) Uani 1 1 d . . . . .
C16 C 0.64872(11) 0.16187(11) 0.11495(9) 0.0179(3) Uani 1 1 d . . . . .
C17 C 0.78452(11) 0.18348(11) 0.35811(9) 0.0197(3) Uani 1 1 d . . . . .
N12 N 0.66037(9) 0.41855(9) 0.23045(8) 0.0167(2) Uani 1 1 d . . . . .
N13 N 0.50368(9) 0.59101(9) 0.23489(8) 0.0166(2) Uani 1 1 d . . . . .
N14 N 0.81686(12) -0.05859(10) 0.24263(10) 0.0288(3) Uani 1 1 d . . . . .
N15 N 0.95213(11) 0.22582(12) 0.20326(10) 0.0288(3) Uani 1 1 d . . . . .
N16 N 0.60276(12) 0.15738(11) 0.04876(9) 0.0287(3) Uani 1 1 d . . . . .
N17 N 0.81874(13) 0.18733(13) 0.42582(9) 0.0345(3) Uani 1 1 d . . . . .
O5 O 0.37436(9) 0.61992(9) 0.00624(8) 0.0237(2) Uani 1 1 d D . . . .
H5WA H 0.3803(17) 0.6776(12) -0.0091(13) 0.036 Uiso 1 1 d D U . . .
H5WB H 0.3223(14) 0.6197(16) 0.0228(14) 0.036 Uiso 1 1 d D U . . .
O6 O 1.13300(11) 0.39235(11) 0.07821(8) 0.0333(3) Uani 1 1 d D . . . .
H6WA H 1.1040(18) 0.3370(13) 0.0716(15) 0.050 Uiso 1 1 d D U . . .
H6WB H 1.160(2) 0.3956(18) 0.1236(9) 0.050 Uiso 1 1 d D U . . .
O7 O 0.99594(12) 0.27702(11) 0.54421(8) 0.0362(3) Uani 1 1 d D . . . .
H7WA H 0.9478(16) 0.2470(18) 0.5158(14) 0.054 Uiso 1 1 d D U . . .
H7WB H 0.981(2) 0.283(2) 0.5852(11) 0.054 Uiso 1 1 d D U . . .
 
loop_
 _atom_site_aniso_label
 _atom_site_aniso_U_11
 _atom_site_aniso_U_22
 _atom_site_aniso_U_33
 _atom_site_aniso_U_23
 _atom_site_aniso_U_13
 _atom_site_aniso_U_12
Dy1 0.00857(3) 0.00886(3) 0.01053(3) -0.00076(2) 0.00248(2) 0.00040(2)
N5 0.0115(5) 0.0127(5) 0.0138(5) -0.0015(4) 0.0041(4) 0.0004(4)
N6 0.0112(5) 0.0116(5) 0.0159(5) -0.0011(4) 0.0028(4) 0.0011(4)
N7 0.0124(5) 0.0152(5) 0.0129(5) -0.0014(4) 0.0026(4) 0.0002(4)
O1 0.0136(4) 0.0223(5) 0.0142(5) -0.0002(4) 0.0046(4) 0.0038(4)
O2 0.0190(4) 0.0134(4) 0.0149(5) 0.0005(3) 0.0053(4) 0.0044(4)
O3 0.0124(4) 0.0117(4) 0.0363(7) -0.0016(4) 0.0040(4) -0.0008(4)
O4 0.0156(4) 0.0201(5) 0.0158(5) -0.0063(4) -0.0010(4) 0.0032(4)
C1 0.0153(6) 0.0153(6) 0.0178(7) -0.0019(5) 0.0056(5) 0.0012(5)
C2 0.0142(5) 0.0127(5) 0.0173(6) -0.0005(5) 0.0034(5) 0.0007(5)
C3 0.0182(6) 0.0271(7) 0.0193(7) 0.0026(6) 0.0010(5) 0.0091(6)
C4 0.0119(5) 0.0133(5) 0.0150(6) -0.0003(4) 0.0009(5) 0.0006(4)
C5 0.0131(5) 0.0151(5) 0.0128(6) -0.0005(4) 0.0009(5) -0.0005(5)
C6 0.0206(6) 0.0211(6) 0.0151(7) 0.0032(5) 0.0023(5) 0.0011(5)
C7 0.0233(7) 0.0280(7) 0.0138(6) 0.0027(5) 0.0051(5) -0.0012(6)
C8 0.0195(6) 0.0274(7) 0.0141(7) -0.0019(5) 0.0060(5) 0.0000(6)
C9 0.0127(5) 0.0176(6) 0.0137(6) -0.0029(5) 0.0024(5) -0.0005(5)
C10 0.0113(5) 0.0165(6) 0.0152(6) -0.0044(5) 0.0033(5) -0.0004(5)
C11 0.0225(7) 0.0248(7) 0.0204(7) -0.0084(6) 0.0062(6) 0.0048(6)
N1 0.0228(6) 0.0448(8) 0.0190(7) 0.0026(6) 0.0106(5) 0.0154(6)
N2 0.0337(7) 0.0201(6) 0.0185(7) -0.0015(5) -0.0001(6) 0.0140(5)
N3 0.0130(5) 0.0190(5) 0.0167(6) 0.0005(4) 0.0056(4) 0.0063(4)
N4 0.0144(5) 0.0127(5) 0.0162(6) -0.0019(4) 0.0033(4) 0.0041(4)
Cr1 0.00910(8) 0.00922(8) 0.01391(10) 0.00048(7) 0.00303(7) 0.00014(7)
C12 0.0114(5) 0.0143(5) 0.0177(6) 0.0005(5) 0.0032(5) -0.0014(5)
C13 0.0153(6) 0.0115(5) 0.0166(6) -0.0006(4) 0.0040(5) -0.0019(4)
C14 0.0157(6) 0.0151(6) 0.0198(7) 0.0011(5) 0.0062(5) -0.0014(5)
C15 0.0155(6) 0.0173(6) 0.0207(7) 0.0007(5) 0.0039(5) -0.0007(5)
C16 0.0192(6) 0.0152(6) 0.0202(7) 0.0005(5) 0.0060(5) 0.0021(5)
C17 0.0168(6) 0.0216(6) 0.0209(7) 0.0008(5) 0.0050(5) 0.0002(5)
N12 0.0131(5) 0.0143(5) 0.0222(6) 0.0003(4) 0.0031(4) -0.0012(4)
N13 0.0150(5) 0.0147(5) 0.0209(6) -0.0028(4) 0.0058(5) -0.0015(4)
N14 0.0328(7) 0.0163(6) 0.0398(9) 0.0014(5) 0.0137(6) 0.0046(5)
N15 0.0178(6) 0.0357(7) 0.0341(8) 0.0028(6) 0.0085(6) -0.0025(6)
N16 0.0342(7) 0.0293(7) 0.0197(7) -0.0010(5) 0.0004(6) 0.0066(6)
N17 0.0348(8) 0.0459(9) 0.0206(7) -0.0008(6) 0.0021(6) 0.0017(7)
O5 0.0209(5) 0.0235(5) 0.0270(6) -0.0008(4) 0.0063(5) 0.0051(4)
O6 0.0306(7) 0.0400(7) 0.0272(7) 0.0001(6) 0.0023(5) 0.0052(6)
O7 0.0452(8) 0.0388(7) 0.0224(7) 0.0018(6) 0.0032(6) -0.0069(6)
 
_geom_special_details
;
 All esds (except the esd in the dihedral angle between two l.s. planes)
 are estimated using the full covariance matrix.  The cell esds are taken
 into account individually in the estimation of esds in distances, angles
 and torsion angles; correlations between esds in cell parameters are only
 used when they are defined by crystal symmetry.  An approximate (isotropic)
 treatment of cell esds is used for estimating esds involving l.s. planes.
;
 
loop_
 _geom_bond_atom_site_label_1
 _geom_bond_atom_site_label_2
 _geom_bond_distance
 _geom_bond_site_symmetry_2
 _geom_bond_publ_flag
Dy1 O1 2.3279(9) . ?
Dy1 O3 2.3508(10) . ?
Dy1 O4 2.3589(10) . ?
Dy1 O2 2.3627(9) . ?
Dy1 N13 2.5080(12) . ?
Dy1 N7 2.5152(12) . ?
Dy1 N5 2.5272(11) . ?
Dy1 N12 2.5288(12) . ?
Dy1 N6 2.5654(11) . ?
N5 C4 1.2868(17) . ?
N5 N3 1.3694(15) . ?
N6 C10 1.2859(18) . ?
N6 N4 1.3641(16) . ?
N7 C5 1.3476(17) . ?
N7 C9 1.3498(17) . ?
O1 C1 1.2489(16) . ?
O2 C2 1.2491(15) . ?
O3 H3WA 0.76(2) . ?
O3 H3WB 0.76(2) . ?
O4 H4WA 0.772(13) . ?
O4 H4WB 0.797(13) . ?
C1 N1 1.3238(18) . ?
C1 N3 1.3737(19) . ?
C2 N2 1.3291(18) . ?
C2 N4 1.3713(18) . ?
C3 C4 1.4900(19) . ?
C3 H3A 0.9800 . ?
C3 H3B 0.9800 . ?
C3 H3C 0.9800 . ?
C4 C5 1.4927(18) . ?
C5 C6 1.3904(19) . ?
C6 C7 1.391(2) . ?
C6 H6 0.9500 . ?
C7 C8 1.385(2) . ?
C7 H7 0.9500 . ?
C8 C9 1.393(2) . ?
C8 H8 0.9500 . ?
C9 C10 1.4844(19) . ?
C10 C11 1.4980(18) . ?
C11 H11A 0.9800 . ?
C11 H11B 0.9800 . ?
C11 H11C 0.9800 . ?
N1 H1A 0.86(2) . ?
N1 H1B 0.83(2) . ?
N2 H2A 0.85(2) . ?
N2 H2B 0.82(2) . ?
N3 H3 0.803(18) . ?
N4 H4 0.797(18) . ?
Cr1 C14 2.0575(14) . ?
Cr1 C15 2.0684(14) . ?
Cr1 C13 2.0701(14) 2_645 ?
Cr1 C16 2.0747(15) . ?
Cr1 C17 2.0747(16) . ?
Cr1 C12 2.0798(13) . ?
C12 N12 1.1525(18) . ?
C13 N13 1.1550(18) . ?
C14 N14 1.1483(18) . ?
C15 N15 1.1478(19) . ?
C16 N16 1.155(2) . ?
C17 N17 1.146(2) . ?
O5 H5WA 0.793(13) . ?
O5 H5WB 0.785(14) . ?
O6 H6WA 0.796(14) . ?
O6 H6WB 0.779(14) . ?
O7 H7WA 0.793(14) . ?
O7 H7WB 0.775(14) . ?
 
loop_
 _geom_angle_atom_site_label_1
 _geom_angle_atom_site_label_2
 _geom_angle_atom_site_label_3
 _geom_angle
 _geom_angle_site_symmetry_1
 _geom_angle_site_symmetry_3
 _geom_angle_publ_flag
O1 Dy1 O3 75.08(4) . . ?
O1 Dy1 O4 68.93(3) . . ?
O3 Dy1 O4 129.47(4) . . ?
O1 Dy1 O2 97.74(3) . . ?
O3 Dy1 O2 77.89(4) . . ?
O4 Dy1 O2 73.27(4) . . ?
O1 Dy1 N13 140.49(4) . . ?
O3 Dy1 N13 141.01(4) . . ?
O4 Dy1 N13 73.02(4) . . ?
O2 Dy1 N13 80.89(4) . . ?
O1 Dy1 N7 125.19(4) . . ?
O3 Dy1 N7 80.60(4) . . ?
O4 Dy1 N7 149.70(4) . . ?
O2 Dy1 N7 124.07(3) . . ?
N13 Dy1 N7 84.83(4) . . ?
O1 Dy1 N5 64.07(4) . . ?
O3 Dy1 N5 71.28(4) . . ?
O4 Dy1 N5 119.05(4) . . ?
O2 Dy1 N5 147.23(3) . . ?
N13 Dy1 N5 130.85(4) . . ?
N7 Dy1 N5 61.75(4) . . ?
O1 Dy1 N12 86.36(4) . . ?
O3 Dy1 N12 138.14(4) . . ?
O4 Dy1 N12 73.78(4) . . ?
O2 Dy1 N12 142.66(4) . . ?
N13 Dy1 N12 73.08(4) . . ?
N7 Dy1 N12 80.23(4) . . ?
N5 Dy1 N12 66.86(4) . . ?
O1 Dy1 N6 147.76(4) . . ?
O3 Dy1 N6 75.44(4) . . ?
O4 Dy1 N6 123.25(4) . . ?
O2 Dy1 N6 63.34(4) . . ?
N13 Dy1 N6 65.83(4) . . ?
N7 Dy1 N6 61.46(4) . . ?
N5 Dy1 N6 117.28(4) . . ?
N12 Dy1 N6 124.86(4) . . ?
C4 N5 N3 120.45(11) . . ?
C4 N5 Dy1 123.23(9) . . ?
N3 N5 Dy1 115.62(8) . . ?
C10 N6 N4 120.31(11) . . ?
C10 N6 Dy1 123.41(9) . . ?
N4 N6 Dy1 115.49(8) . . ?
C5 N7 C9 118.92(12) . . ?
C5 N7 Dy1 118.41(9) . . ?
C9 N7 Dy1 120.26(9) . . ?
C1 O1 Dy1 125.04(9) . . ?
C2 O2 Dy1 124.63(9) . . ?
Dy1 O3 H3WA 122.0(16) . . ?
Dy1 O3 H3WB 127.0(16) . . ?
H3WA O3 H3WB 106(2) . . ?
Dy1 O4 H4WA 126.1(15) . . ?
Dy1 O4 H4WB 120.8(14) . . ?
H4WA O4 H4WB 112(2) . . ?
O1 C1 N1 122.29(14) . . ?
O1 C1 N3 119.89(12) . . ?
N1 C1 N3 117.81(13) . . ?
O2 C2 N2 122.89(14) . . ?
O2 C2 N4 120.28(12) . . ?
N2 C2 N4 116.82(12) . . ?
C4 C3 H3A 109.5 . . ?
C4 C3 H3B 109.5 . . ?
H3A C3 H3B 109.5 . . ?
C4 C3 H3C 109.5 . . ?
H3A C3 H3C 109.5 . . ?
H3B C3 H3C 109.5 . . ?
N5 C4 C3 124.59(13) . . ?
N5 C4 C5 113.45(11) . . ?
C3 C4 C5 121.94(12) . . ?
N7 C5 C6 121.92(12) . . ?
N7 C5 C4 115.15(12) . . ?
C6 C5 C4 122.88(12) . . ?
C5 C6 C7 118.32(13) . . ?
C5 C6 H6 120.8 . . ?
C7 C6 H6 120.8 . . ?
C8 C7 C6 119.84(14) . . ?
C8 C7 H7 120.1 . . ?
C6 C7 H7 120.1 . . ?
C7 C8 C9 118.38(13) . . ?
C7 C8 H8 120.8 . . ?
C9 C8 H8 120.8 . . ?
N7 C9 C8 121.89(13) . . ?
N7 C9 C10 115.40(12) . . ?
C8 C9 C10 122.70(12) . . ?
N6 C10 C9 113.95(11) . . ?
N6 C10 C11 125.35(13) . . ?
C9 C10 C11 120.70(12) . . ?
C10 C11 H11A 109.5 . . ?
C10 C11 H11B 109.5 . . ?
H11A C11 H11B 109.5 . . ?
C10 C11 H11C 109.5 . . ?
H11A C11 H11C 109.5 . . ?
H11B C11 H11C 109.5 . . ?
C1 N1 H1A 117.9(14) . . ?
C1 N1 H1B 122.3(15) . . ?
H1A N1 H1B 120(2) . . ?
C2 N2 H2A 119.3(13) . . ?
C2 N2 H2B 117.8(15) . . ?
H2A N2 H2B 122(2) . . ?
N5 N3 C1 114.93(11) . . ?
N5 N3 H3 121.5(13) . . ?
C1 N3 H3 123.5(13) . . ?
N6 N4 C2 115.37(11) . . ?
N6 N4 H4 121.0(14) . . ?
C2 N4 H4 122.2(14) . . ?
C14 Cr1 C15 84.36(5) . . ?
C14 Cr1 C13 90.25(5) . 2_645 ?
C15 Cr1 C13 174.57(5) . 2_645 ?
C14 Cr1 C16 91.95(6) . . ?
C15 Cr1 C16 92.71(6) . . ?
C13 Cr1 C16 86.78(6) 2_645 . ?
C14 Cr1 C17 88.79(6) . . ?
C15 Cr1 C17 90.87(6) . . ?
C13 Cr1 C17 89.70(6) 2_645 . ?
C16 Cr1 C17 176.40(6) . . ?
C14 Cr1 C12 175.40(5) . . ?
C15 Cr1 C12 91.13(5) . . ?
C13 Cr1 C12 94.26(5) 2_645 . ?
C16 Cr1 C12 89.22(5) . . ?
C17 Cr1 C12 90.32(6) . . ?
N12 C12 Cr1 174.59(11) . . ?
N13 C13 Cr1 176.37(13) . 2_655 ?
N14 C14 Cr1 174.61(13) . . ?
N15 C15 Cr1 174.30(13) . . ?
N16 C16 Cr1 175.96(13) . . ?
N17 C17 Cr1 178.78(15) . . ?
C12 N12 Dy1 158.95(11) . . ?
C13 N13 Dy1 155.25(10) . . ?
H5WA O5 H5WB 106(2) . . ?
H6WA O6 H6WB 106(2) . . ?
H7WA O7 H7WB 106(3) . . ?
 
loop_
 _geom_hbond_atom_site_label_D 
 _geom_hbond_atom_site_label_H 
 _geom_hbond_atom_site_label_A 
 _geom_hbond_distance_DH 
 _geom_hbond_distance_HA 
 _geom_hbond_distance_DA 
 _geom_hbond_angle_DHA 
 _geom_hbond_site_symmetry_A 
O3 H3WA N14  0.76(2) 1.97(2) 2.7221(17) 170(2) 1_565
O3 H3WB N15  0.76(2) 2.09(2) 2.8435(18) 170(2) 2_755
O4 H4WA O5  0.772(13) 1.985(14) 2.7543(15) 175(2) .
O4 H4WB O5  0.797(13) 2.069(13) 2.8592(15) 171.2(19) 3_665
N1 H1A O6  0.86(2) 2.12(2) 2.944(2) 160.6(19) 3_765
N1 H1B O6  0.83(2) 2.15(2) 2.9545(19) 162(2) .
N2 H2A N16  0.85(2) 2.17(2) 3.007(2) 167.0(19) 3_665
N3 H3 N14  0.803(18) 2.640(18) 3.3802(19) 153.9(16) 2_755
N4 H4 N12  0.797(18) 2.710(19) 3.3226(16) 135.1(16) 2_655
N4 H4 N13  0.797(18) 2.748(17) 3.4120(16) 142.0(16) 2_655
O5 H5WA N16  0.793(13) 2.244(14) 3.0371(19) 178(2) 3_665
O5 H5WB N17  0.785(14) 2.356(15) 3.098(2) 158.1(19) 2_655
O6 H6WA O7  0.796(14) 1.993(15) 2.767(2) 164(3) 4_565
O6 H6WB N14  0.779(14) 2.324(17) 3.061(2) 158(3) 2_755
O7 H7WA N17  0.793(14) 2.129(15) 2.914(2) 170(3) .
O7 H7WB N15  0.775(14) 2.148(15) 2.915(2) 171(3) 4_566
C3 H3B O7  0.98 2.61 3.462(2) 145.4 .
C6 H6 O7  0.95 2.63 3.584(2) 177.7 .
C8 H8 O2  0.95 2.61 3.5339(18) 163.6 4_576
 
_refine_diff_density_max    0.413
_refine_diff_density_min   -0.542
_refine_diff_density_rms    0.074

_shelx_res_file
;
TITL c99_1_cr2_150k
    shelx.res
    created by SHELXL-2016/6 at 14:42:16 on 24-Feb-2022
CELL 0.71073  12.84505  12.79181  17.18315  90.0000 103.3953  90.0000
ZERR    4.00   0.00012   0.00010   0.00016   0.0000   0.0009   0.0000
LATT   1
SYMM  - X, 1/2 + Y, 1/2 - Z
SFAC  C    Cr  H    Dy   N    O
UNIT  68   4   100  4    52   28
MERG   2
rem OMIT     0.00 180.00
rem shel 20 0.68
OMIT    12  14   3
OMIT     5   4   3
OMIT    -2   2   5
OMIT     2   3   0
OMIT     6   5   1
OMIT     5   4   2
omit     5   3   1

eqiv $1   -x+1, y+1/2, -z+1/2
eqiv $2   -x+1, y-1/2, -z+1/2
eqiv $3   x, y+1, z
eqiv $4   -x+2, y+1/2, -z+1/2
eqiv $5   -x+1, -y+1, -z
eqiv $6   x, -y+1/2, z-1/2
eqiv $7   x, -y+1/2, z+1/2
eqiv $8   x, -y+3/2, z+1/2
eqiv $9   2-x, 1-y, -z
htab
htab O3 n14_$3
htab O3 n15_$4
htab O4 O5
htab O4 O5_$5
htab N1 O6_$9
htab N1 O6
htab N2 N16_$5
htab N3 N14_$4
htab N4 N12_$1
htab N4 N13_$1
htab O5 N16_$5
htab O5 N17_$1
htab O6 O7_$6
htab O6 N14_$4
htab O7 N17
htab O7 N15_$7
htab C3 O7
htab c6 O7
htab C8 O2_$8
FMAP   2
PLAN   20
ACTA   62.4
BOND   $H
temp -123
size 0.049 0.076 0.355
L.S.  20
rtab M...M dy1 cr1
rtab M...M dy1 cr1_$1
rtab ang Cr1 Dy1 Cr1_$1
rtab ang Dy1 Cr1 Dy1_$2
sadi o4 h4wa o4 h4wb o5 h5wa o5 h5wb o6 h6wa o6 h6wb O7 H7WA O7 H7WB
WGHT    0.015200    1.401300
FVAR       1.33745
MOLE    1
DY1   4    0.685224    0.610866    0.205862    11.00000    0.00857    0.00886 =
         0.01053   -0.00076    0.00248    0.00040
N5    5    0.859224    0.516897    0.262946    11.00000    0.01145    0.01267 =
         0.01376   -0.00147    0.00407    0.00043
N6    5    0.633304    0.760130    0.289159    11.00000    0.01124    0.01164 =
         0.01590   -0.00113    0.00278    0.00107
N7    5    0.752614    0.605643    0.355404    11.00000    0.01242    0.01518 =
         0.01294   -0.00142    0.00260    0.00022
O1    6    0.781639    0.557578    0.113636    11.00000    0.01361    0.02232 =
         0.01418   -0.00019    0.00460    0.00384
O2    6    0.599723    0.757013    0.134450    11.00000    0.01899    0.01345 =
         0.01492    0.00047    0.00534    0.00438
O3    6    0.826590    0.731330    0.220048    11.00000    0.01244    0.01173 =
         0.03625   -0.00163    0.00397   -0.00077
H3WA  3    0.817732    0.789919    0.222260    11.00000   -1.50000
H3WB  3    0.884904    0.722211    0.240766    11.00000   -1.50000
O4    6    0.570317    0.545662    0.088457    11.00000    0.01563    0.02015 =
         0.01577   -0.00633   -0.00096    0.00324
H4WA  3    0.514857    0.567765    0.067940    11.00000   -1.50000
H4WB  3    0.590987    0.503569    0.061317    11.00000   -1.50000
MOLE    3
C1    1    0.872500    0.516970    0.131009    11.00000    0.01529    0.01532 =
         0.01781   -0.00185    0.00555    0.00115
C2    1    0.558552    0.830366    0.164812    11.00000    0.01423    0.01269 =
         0.01730   -0.00048    0.00344    0.00074
C3    1    0.978078    0.412769    0.367318    11.00000    0.01825    0.02710 =
         0.01925    0.00259    0.00098    0.00914
AFIX 137
H3A   3    0.963108    0.343797    0.342411    11.00000   -1.50000
H3B   3    0.988313    0.406132    0.425419    11.00000   -1.50000
H3C   3    1.043139    0.441453    0.354958    11.00000   -1.50000
AFIX   0
C4    1    0.886355    0.484113    0.335639    11.00000    0.01193    0.01331 =
         0.01500   -0.00027    0.00088    0.00057
C5    1    0.818383    0.527043    0.387753    11.00000    0.01311    0.01507 =
         0.01276   -0.00053    0.00093   -0.00047
C6    1    0.824813    0.491920    0.465301    11.00000    0.02059    0.02110 =
         0.01514    0.00322    0.00225    0.00114
AFIX  43
H6    3    0.868361    0.433700    0.486084    11.00000   -1.20000
AFIX   0
C7    1    0.765861    0.544192    0.511688    11.00000    0.02327    0.02797 =
         0.01382    0.00271    0.00510   -0.00121
AFIX  43
H7    3    0.765360    0.519327    0.563696    11.00000   -1.20000
AFIX   0
C8    1    0.707899    0.632580    0.481854    11.00000    0.01951    0.02741 =
         0.01407   -0.00191    0.00600   -0.00003
AFIX  43
H8    3    0.672517    0.672703    0.514488    11.00000   -1.20000
AFIX   0
C9    1    0.702753    0.661200    0.402852    11.00000    0.01266    0.01762 =
         0.01368   -0.00292    0.00242   -0.00054
C10   1    0.643841    0.755045    0.365327    11.00000    0.01125    0.01648 =
         0.01524   -0.00440    0.00331   -0.00042
C11   1    0.602942    0.834340    0.415086    11.00000    0.02252    0.02477 =
         0.02041   -0.00840    0.00615    0.00481
AFIX 137
H11A  3    0.600839    0.903232    0.389819    11.00000   -1.50000
H11B  3    0.650521    0.836876    0.468626    11.00000   -1.50000
H11C  3    0.530712    0.814788    0.419367    11.00000   -1.50000
AFIX   0
N1    5    0.928522    0.498995    0.076707    11.00000    0.02283    0.04483 =
         0.01900    0.00255    0.01057    0.01536
rem AFIX  93
H1A   3    0.901247    0.517461    0.028434    11.00000   -1.20000
H1B   3    0.988395    0.470395    0.088048    11.00000   -1.20000
rem AFIX   0
N2    5    0.496903    0.902686    0.121352    11.00000    0.03368    0.02010 =
         0.01854   -0.00147   -0.00009    0.01399
rem AFIX  93
H2A   3    0.475035    0.893645    0.071339    11.00000   -1.20000
H2B   3    0.471521    0.948064    0.145171    11.00000   -1.20000
rem AFIX   0
N3    5    0.916938    0.488265    0.208636    11.00000    0.01301    0.01901 =
         0.01669    0.00046    0.00558    0.00629
rem AFIX  43
H3    3    0.972437    0.457003    0.222010    11.00000   -1.20000
rem AFIX   0
N4    5    0.577165    0.840064    0.246350    11.00000    0.01438    0.01267 =
         0.01622   -0.00190    0.00333    0.00412
rem AFIX  43
H4    3    0.546715    0.882071    0.267242    11.00000   -1.20000
rem AFIX   0
MOLE    2
CR1   2    0.721312    0.173346    0.235770    11.00000    0.00910    0.00922 =
         0.01391    0.00048    0.00303    0.00014
C12   1    0.676938    0.329923    0.232776    11.00000    0.01136    0.01433 =
         0.01771    0.00054    0.00316   -0.00141
C13   1    0.421483    0.619752    0.242716    11.00000    0.01528    0.01146 =
         0.01659   -0.00062    0.00400   -0.00190
C14   1    0.777522    0.022421    0.238981    11.00000    0.01572    0.01513 =
         0.01975    0.00106    0.00617   -0.00141
C15   1    0.867851    0.212239    0.213234    11.00000    0.01549    0.01730 =
         0.02075    0.00067    0.00392   -0.00070
C16   1    0.648720    0.161869    0.114946    11.00000    0.01915    0.01524 =
         0.02015    0.00045    0.00598    0.00209
C17   1    0.784519    0.183480    0.358112    11.00000    0.01678    0.02156 =
         0.02092    0.00078    0.00496    0.00025
N12   5    0.660365    0.418550    0.230454    11.00000    0.01305    0.01431 =
         0.02224    0.00028    0.00313   -0.00116
N13   5    0.503685    0.591005    0.234893    11.00000    0.01500    0.01469 =
         0.02086   -0.00281    0.00580   -0.00150
N14   5    0.816864   -0.058594    0.242632    11.00000    0.03282    0.01634 =
         0.03977    0.00142    0.01367    0.00458
N15   5    0.952126    0.225825    0.203257    11.00000    0.01784    0.03567 =
         0.03406    0.00277    0.00845   -0.00245
N16   5    0.602756    0.157377    0.048760    11.00000    0.03425    0.02932 =
         0.01968   -0.00102    0.00045    0.00659
N17   5    0.818743    0.187327    0.425824    11.00000    0.03481    0.04591 =
         0.02058   -0.00075    0.00208    0.00166
MOLE    3
O5    6    0.374356    0.619915    0.006241    11.00000    0.02093    0.02350 =
         0.02701   -0.00084    0.00626    0.00513
H5WA  3    0.380283    0.677575   -0.009120    11.00000   -1.50000
H5WB  3    0.322303    0.619650    0.022804    11.00000   -1.50000
O6    6    1.133002    0.392348    0.078208    11.00000    0.03063    0.03997 =
         0.02719    0.00014    0.00229    0.00523
H6WA  3    1.103972    0.336964    0.071582    11.00000   -1.50000
H6WB  3    1.160465    0.395622    0.123616    11.00000   -1.50000
O7    6    0.995938    0.277022    0.544209    11.00000    0.04522    0.03878 =
         0.02244    0.00178    0.00320   -0.00685
H7WA  3    0.947764    0.247039    0.515767    11.00000   -1.50000
H7WB  3    0.980904    0.282626    0.585182    11.00000   -1.50000
HKLF    4


REM  c99_1_cr2_150k
REM R1 =  0.0159 for    8567 Fo > 4sig(Fo)  and  0.0195 for all    9358 data
REM    402 parameters refined using     28 restraints

END

WGHT      0.0156      1.0451

REM Instructions for potential hydrogen bonds
HTAB O3 N14_$3
HTAB O3 N15_$4
HTAB O4 O5
HTAB O4 O5_$5
HTAB C3 O7
HTAB C6 O7
HTAB C8 O2_$8
HTAB N1 O6_$9
HTAB N1 O6
HTAB N2 N16_$5
HTAB N3 N14_$4
HTAB O5 N16_$5
HTAB O5 N17_$1
HTAB O6 O7_$6
HTAB O6 N14_$4
HTAB O7 N17
HTAB O7 N15_$7

REM Highest difference peak  0.413,  deepest hole -0.542,  1-sigma level  0.074
Q1    1   0.8152  0.5062  0.4242  11.00000  0.05    0.41
Q2    1   0.5838  0.8419  0.2087  11.00000  0.05    0.37
Q3    1   0.6993  0.6415  0.4375  11.00000  0.05    0.37
Q4    1   0.6233  0.7881  0.3913  11.00000  0.05    0.37
Q5    1   0.8662  0.4961  0.2973  11.00000  0.05    0.37
Q6    1   0.5278  0.8652  0.1417  11.00000  0.05    0.36
Q7    1   0.7876  0.5158  0.4802  11.00000  0.05    0.36
Q8    1   0.9252  0.4438  0.3520  11.00000  0.05    0.36
Q9    1   0.7458  0.5976  0.4948  11.00000  0.05    0.34
Q10   1   0.6095  0.8025  0.2693  11.00000  0.05    0.34
Q11   1   0.5386  0.8792  0.3912  11.00000  0.05    0.34
Q12   1   0.7877  0.5636  0.3715  11.00000  0.05    0.34
Q13   1   0.8467  0.5026  0.3556  11.00000  0.05    0.34
Q14   1   0.8013  0.5310  0.2501  11.00000  0.05    0.33
Q15   1   0.8924  0.4972  0.1692  11.00000  0.05    0.33
Q16   1   0.6161  0.7441  0.3249  11.00000  0.05    0.33
Q17   1   0.6050  0.5789  0.1221  11.00000  0.05    0.33
Q18   1   0.6089  0.7245  0.1576  11.00000  0.05    0.32
Q19   1   0.7479  0.0802  0.2333  11.00000  0.05    0.32
Q20   1   0.5859  0.7957  0.1499  11.00000  0.05    0.32
;
_shelx_res_checksum   87985

_shelx_hkl_file
;
   0   0   3-6.79222 26.6434   2
   0   0  -3-4.51699 23.7918   3
   0   0   4 89120.7 1095.16   2
   0   0   5-45.6298 31.3263   2
   0   0  -5 56.7361 30.3789   3
   0   0   6 74390.1 980.613   2
   0   0  -6 75130.4 970.625   3
   0   0  -7 31.1976 33.3405   3
   0   0   7 8.80906 31.2529   2
   0   0  -8 8212.70 214.378   3
   0   0   8 8063.18 220.521   2
   0   0  -9 17.6242 38.1229   3
   0   0 -10 20439.8 412.013   3
   0   0 -11 31.1753 42.2500   3
   0   0 -12 34654.7 626.821   3
   0   0 -13 88.1721 52.6472   3
   0   0 -14 26776.1 560.810   3
   0   0 -15 46.5549 58.8732   3
   0   0 -16 1372.41 124.837   3
   0   0 -17 3.12275 56.8543   3
   0   0 -18 3612.77 216.604   3
   0   0 -19 48.3962 67.5556   3
   0   0 -20 6502.29 309.075   3
   0   0 -21-53.5782 65.2882   3
   0   0 -22 10301.2 422.718   3
   0   0 -23 155.339 90.5814   3
   0   0 -24 12493.5 492.640   3
   0  -1   0 28.9340 9.90751   7
   0   1  -1 4055.63 68.0698   3
   0   1  -1 3901.44 73.2588   4
   0   1   1 4015.38 70.2309   2
   0  -1   1 4008.59 67.9826   5
   0  -1  -1 3915.21 70.5536   1
   0  -1   1 3860.39 67.1425   3
   0   1   1 4082.73 71.1209   1
   0  -1   1 4069.68 73.9787   4
   0  -1  -1 3888.45 69.3573   2
   0   1   2 2551.84 64.5827   2
   0  -1   2 2504.95 60.5059   3
   0  -1   2 2380.50 58.5241   6
   0   1  -2 2548.72 60.8532   3
   0  -1  -2 2495.99 64.5097   2
   0   1  -2 2450.58 59.3010   6
   0  -1   3 26076.6 352.397   3
   0  -1  -3 27131.4 363.330   2
   0   1   3 24983.8 360.689   2
   0   1  -3 25657.1 351.349   3
   0  -1   3 25335.2 350.719   6
   0   1  -3 26242.8 351.278   6
   0   1  -4 41787.3 547.729   3
   0  -1   4 41269.9 545.201   3
   0   1   4 41647.1 559.691   2
   0  -1   4 41430.5 547.866   6
   0  -1  -4 40308.1 556.879   2
   0  -1   5 21442.1 337.627   6
   0   1   5 20778.9 345.488   2
   0  -1   5 21345.9 335.681   3
   0   1  -5 21098.4 335.544   3
   0  -1  -5 21488.4 347.458   2
   0  -1  -6 776.416 62.1293   3
   0   1   6 755.808 62.6816   2
   0  -1  -6 667.175 61.9621   2
   0   1  -6 718.145 61.3938   3
   0  -1   6 813.994 57.1790   3
   0  -1   6 707.932 59.6437   2
   0  -1   6 749.285 56.8012   6
   0   1   7 98527.0 1272.07   2
   0  -1   7 96882.2 1256.35   6
   0  -1  -7 99883.9 1267.36   3
   0  -1   7 98957.9 1271.77   2
   0   1  -7 96665.0 1254.64   3
   0  -1   7 98538.2 1252.25   3
   0  -1  -8 1650.71 98.2008   3
   0  -1   8 1718.37 98.3396   2
   0  -1   8 1732.81 96.0108   6
   0   1   8 1640.53 95.7605   2
   0   1  -8 1911.75 97.6546   3
   0   1  -9 17682.2 355.950   3
   0  -1   9 17505.1 359.351   6
   0  -1  -9 17114.8 355.280   3
   0   1 -10-44.3538 45.4711   3
   0  -1 -10 92.0523 45.6385   3
   0  -1 -11 2977.36 147.268   3
   0   1 -11 3220.42 150.693   3
   0  -1 -12 3196.01 159.675   3
   0   1 -12 2643.79 145.079   3
   0  -1 -13 2508.45 150.288   3
   0   1 -13 2591.46 148.849   3
   0  -1 -14 12792.9 361.595   3
   0   1 -14 12716.6 357.271   3
   0  -1 -15 28787.7 605.914   3
   0   1 -15 28312.4 601.661   3
   0  -1 -16 21496.5 521.487   3
   0   1 -16 20857.7 515.375   3
   0   1 -17 26042.2 602.099   3
   0  -1 -17 24974.1 592.089   3
   0  -1 -18 7917.73 322.548   3
   0   1 -18 8364.17 331.393   3
   0   1 -19 8672.58 350.190   3
   0  -1 -19 8450.15 346.658   3
   0   1 -20 6720.42 315.599   3
   0  -1 -20 7141.08 330.004   3
   0  -1 -21 3419.23 240.494   3
   0   1 -21 3483.00 238.542   3
   0  -1 -22 1198.76 157.536   3
   0   1 -22 1624.53 172.709   3
   0   1 -23 315.405 101.643   3
   0  -1 -23 450.911 115.288   3
   0   1 -24 236.835 85.5733   3
   0  -2   0 2347.54 54.2186   5
   0  -2   0 2501.83 64.6854   7
   0   2   0 2492.34 53.9849   5
   0   2   0 2320.30 62.8719   7
   0   2   0 2395.78 63.1897   1
   0  -2   0 2338.01 51.6825   2
   0   2   1 171016. 1933.49   1
   0  -2  -1 164308. 1916.99   2
   0   2  -1 173768. 1918.51   3
   0   2  -1 164092. 1931.88   7
   0  -2   1 166069. 1937.29   4
   0   2  -2 2185.85 59.9411   3
   0  -2   2 2080.67 59.2680   5
   0  -2  -2 2006.07 63.1683   1
   0   2   2 2111.24 64.3340   1
   0   2  -2 2186.60 67.9696   4
   0  -2   2 2196.50 69.5738   4
   0   2  -2 2030.80 63.7287   7
   0  -2   2 2178.02 60.5821   3
   0   2   2 2055.64 62.1079   2
   0  -2  -2 2181.49 63.2150   2
   0  -2   3 49759.9 642.539   3
   0   2  -3 52195.3 641.938   6
   0  -2  -3 51860.0 645.055   1
   0  -2  -3 49669.7 651.929   2
   0  -2   3 51140.6 655.944   4
   0   2   3 51826.1 655.320   2
   0   2  -3 52366.1 644.344   3
   0   2   4 1300.27 64.6854   2
   0  -2   4 1342.32 65.1421   4
   0  -2  -4 1329.51 56.9106   1
   0  -2   4 1249.65 60.0116   3
   0   2  -4 1268.82 59.3230   3
   0  -2   4 1194.21 56.9504   6
   0  -2  -4 1239.97 63.5235   2
   0   2  -4 1247.43 57.4510   6
   0   2  -5 19653.2 314.475   6
   0   2   5 19624.8 333.974   2
   0  -2   5 19920.6 319.020   6
   0  -2   5 20506.6 321.369   3
   0   2  -5 18839.5 318.961   3
   0  -2  -5 19888.2 332.896   2
   0  -2   6 185.317 34.5097   6
   0   2  -6 139.480 35.7667   3
   0   2   6 243.968 41.9890   2
   0  -2  -6 207.288 45.1792   2
   0  -2   6 223.798 38.5628   3
   0   2   7 3316.11 128.852   2
   0   2  -7 2977.97 116.365   3
   0  -2  -7 3045.55 123.667   2
   0  -2   7 3136.02 118.629   6
   0  -2   7 3308.43 118.189   3
   0  -2   8 14.5864 34.8043   2
   0  -2  -8 3.56948 42.2546   2
   0   2  -8 27.0393 37.0671   3
   0  -2   8 37.0003 29.7141   6
   0  -2  -8 42.7356 36.7822   3
   0  -2   8 19.3254 29.7596   3
   0   2   8 117.836 40.7270   2
   0   2  -9 18422.3 367.754   3
   0  -2   9 19184.6 376.102   6
   0  -2  -9 18027.6 374.413   3
   0   2 -10 4820.13 178.059   3
   0  -2 -10 4714.16 177.209   3
   0   2 -11 53192.3 832.274   3
   0  -2 -11 53636.1 837.821   3
   0  -2 -12 90.9891 45.1673   3
   0   2 -12 109.861 48.4519   3
   0   2 -13 26245.9 536.111   3
   0  -2 -13 25755.9 534.888   3
   0   2 -14 96.1670 61.6284   3
   0  -2 -14 96.2747 51.6109   3
   0  -2 -15 6224.37 254.107   3
   0   2 -15 6438.31 257.357   3
   0   2 -16 17.5337 52.0518   3
   0  -2 -16-40.9409 60.3627   3
   0   2 -17 91.9677 60.1842   3
   0  -2 -17-13.6530 63.9872   3
   0  -2 -18 32.6300 58.2793   3
   0   2 -18 125.283 53.9417   3
   0  -2 -19 6140.07 291.731   3
   0   2 -19 5749.86 279.457   3
   0  -2 -20 76.9217 75.1887   3
   0   2 -20 23.3010 67.0302   3
   0   2 -21 14392.9 489.265   3
   0  -2 -21 15073.9 499.913   3
   0  -2 -22 1545.73 177.167   3
   0   2 -22 1673.83 173.712   3
   0  -2 -23 6106.86 332.998   3
   0   2 -23 6211.49 333.866   3
   0   2 -24 527.806 114.534   3
   0  -2  24 689.049 127.157   4
   0  -2  25 3141.45 234.691   4
   0  -3   0-25.3074 19.4273   3
   0   3   0 12.6375 23.9922   7
   0   3   0-9.75795 19.2683   5
   0  -3   0 12.9657 18.9657   5
   0  -3   0 12.2991 26.2966   7
   0  -3   0 7.95001 16.2413   2
   0   3   0-5.37663 27.3996   1
   0   3   1 72.5116 20.7144   2
   0   3  -1 40.6213 25.0945   4
   0   3   1 58.0083 21.7381   5
   0  -3  -1 106.081 21.2362   2
   0  -3  -1 42.9956 24.5640   7
   0   3  -1 64.3041 21.4277   5
   0   3  -1 53.8169 25.3808   7
   0  -3  -1 76.4515 20.4426   5
   0  -3   1 89.6471 31.5709   7
   0   3   1 94.1873 32.4849   1
   0  -3   1 90.7997 20.9113   5
   0   3  -1 32.9370 19.6020   3
   0  -3  -1 55.4923 35.6250   1
   0  -3   1 67.1598 21.0817   3
   0   3  -2 48720.8 597.669   5
   0  -3   2 48107.7 618.922   7
   0   3  -2 48929.1 622.781   7
   0  -3   2 48432.6 599.215   3
   0  -3   2 47308.0 623.215   4
   0   3   2 47103.7 617.852   1
   0   3  -2 47042.7 624.093   4
   0  -3  -2 47916.0 618.106   1
   0  -3  -2 47479.7 601.898   2
   0  -3   2 47009.0 597.587   5
   0   3   2 46834.5 600.327   2
   0   3   2 47356.4 606.603   5
   0   3  -2 46910.5 597.359   3
   0  -3  -3 748.952 48.0719   2
   0  -3   3 846.467 55.6785   4
   0   3  -3 713.169 45.3127   3
   0   3   3 748.893 46.2971   2
   0  -3  -3 700.913 51.5638   1
   0   3  -3 664.822 49.3573   4
   0   3  -3 682.640 47.6848   7
   0  -3   3 766.695 44.6523   5
   0  -3   3 729.175 42.9690   3
   0   3   3 690.592 48.1360   1
   0  -3  -4 58042.7 714.181   1
   0  -3   4 52909.2 701.476   5
   0   3  -4 53838.1 701.606   3
   0   3   4 52279.9 714.788   2
   0   3  -4 55594.1 701.268   6
   0  -3   4 53858.6 700.168   3
   0  -3  -4 52757.2 714.551   2
   0  -3   4 54404.2 722.684   4
   0  -3   5 25710.2 390.478   3
   0  -3  -5 25315.2 403.926   2
   0  -3  -5 25683.3 389.835   1
   0   3  -5 25405.5 386.433   6
   0  -3   5 25247.4 403.901   4
   0   3  -5 26069.0 393.664   3
   0   3   5 24823.5 404.268   2
   0  -3   6 70878.5 936.804   4
   0   3  -6 69949.3 924.029   3
   0  -3  -6 70964.7 940.435   2
   0  -3  -6 69814.0 910.257   1
   0  -3   6 70791.9 921.017   3
   0   3   6 67732.7 939.203   2
   0   3  -6 72217.6 916.398   6
   0  -3   7 4595.26 144.931   6
   0  -3   7 4394.58 148.225   4
   0  -3   7 4616.96 143.938   3
   0   3   7 4472.20 152.494   2
   0  -3  -7 4305.44 150.810   2
   0   3  -7 4515.08 143.969   3
   0  -3  -7 4446.08 132.742   1
   0  -3   8 36359.6 560.995   3
   0  -3   8 35600.2 562.261   6
   0  -3  -8 36139.9 582.909   2
   0   3   8 34797.6 579.209   2
   0   3  -8 35199.2 560.926   3
   0  -3   9 993.944 84.9157   6
   0   3  -9 1027.43 92.3702   3
   0  -3  -9 987.097 82.3828   2
   0   3 -10 14334.7 329.762   3
   0  -3 -10 14508.7 340.335   3
   0  -3 -11 1605.34 114.245   3
   0   3 -11 1914.14 121.055   3
   0  -3 -12 3676.09 175.088   3
   0   3 -12 3741.92 171.599   3
   0   3 -13 1174.47 111.876   3
   0  -3 -13 1177.36 109.810   3
   0  -3 -14 15652.5 412.729   3
   0   3 -14 16356.3 415.132   3
   0   3 -15 9745.81 321.311   3
   0  -3 -15 9611.10 322.642   3
   0   3 -16 14950.0 424.299   3
   0  -3 -16 15386.5 433.453   3
   0  -3 -17 8677.07 328.452   3
   0   3 -17 8577.66 322.717   3
   0  -3 -18 14023.0 440.052   3
   0   3 -18 13767.4 434.213   3
   0   3 -19 3729.52 226.314   3
   0  -3 -19 3388.52 225.144   3
   0  -3  20 6223.16 288.625   4
   0   3 -20 6396.58 314.251   3
   0  -3 -20 6332.69 306.405   3
   0  -3  21 1879.32 170.198   4
   0  -3 -21 1631.89 169.145   3
   0   3 -21 1722.10 173.716   3
   0   3 -22 367.290 106.305   3
   0  -3  22 489.914 103.311   4
   0  -3 -22 502.123 108.952   3
   0  -3  23-51.4284 71.2634   4
   0  -3 -23 6.72432 75.2141   3
   0   3 -23 56.2446 78.6521   3
   0  -3  24 736.458 128.976   4
   0   3 -24 959.926 137.693   3
   0  -4   0 57483.5 736.713   7
   0   4   0 55124.7 736.235   1
   0  -4   0 55755.4 711.988   3
   0  -4   0 56234.6 706.058   5
   0   4   0 56122.0 736.034   7
   0  -4   0 56944.4 699.487   2
   0   4   0 58501.0 704.792   5
   0  -4   1 622.389 39.9553   3
   0   4   1 622.895 42.4369   5
   0  -4  -1 772.672 53.3279   7
   0  -4  -1 624.594 38.2384   2
   0   4   1 633.182 37.6003   2
   0   4  -1 721.025 53.1335   4
   0   4  -1 725.687 41.3315   5
   0  -4  -1 642.933 40.7146   5
   0   4   1 577.260 49.3555   1
   0  -4   1 634.118 39.3949   5
   0  -4   1 601.188 49.6942   7
   0   4  -1 638.904 47.7024   7
   0   4  -1 669.897 43.3050   3
   0   4   2 30391.6 422.148   2
   0  -4  -2 31069.8 450.420   1
   0  -4  -2 30473.0 424.107   2
   0   4  -2 30477.2 449.215   7
   0   4   2 31211.9 430.598   5
   0   4  -2 29340.4 422.239   3
   0   4   2 30878.9 449.388   1
   0  -4   2 31676.2 424.252   3
   0  -4   2 31008.7 449.134   7
   0   4  -2 31851.5 458.634   4
   0  -4   2 29963.6 418.747   5
   0   4  -2 31241.5 420.902   5
   0  -4   2 31832.6 460.055   4
   0   4  -3 234.777 31.7303   3
   0   4  -3 215.987 34.5141   7
   0   4   3 201.277 31.4789   2
   0  -4   3 162.434 35.6853   4
   0   4  -3 208.319 32.8151   4
   0  -4  -3 237.769 37.0126   1
   0   4   3 226.285 38.4715   1
   0  -4   3 218.254 30.0040   5
   0  -4   3 217.311 31.5408   3
   0  -4  -3 218.698 32.3378   2
   0  -4   4 24363.7 394.824   4
   0   4  -4 24363.7 397.767   4
   0  -4  -4 24167.4 384.435   1
   0  -4   4 23643.3 368.023   5
   0   4  -4 23293.4 387.201   7
   0   4  -4 23854.1 369.714   3
   0  -4  -4 23992.4 378.085   2
   0   4   4 22960.5 374.046   2
   0   4   4 24037.9 383.726   1
   0   4   5 8388.98 195.752   2
   0  -4  -5 8259.04 190.607   1
   0   4  -5 8372.30 198.085   7
   0   4  -5 8162.84 185.380   3
   0  -4   5 8005.00 182.582   5
   0  -4  -5 8234.97 193.106   2
   0  -4   5 8279.06 183.900   3
   0  -4   5 8483.10 203.309   4
   0   4  -5 8314.41 181.484   6
   0  -4  -6 60.2614 32.5445   2
   0  -4   6 88.2746 37.6459   4
   0  -4   6 79.9377 33.6454   3
   0   4  -6 76.6940 33.6164   6
   0  -4  -6 52.7590 28.5086   1
   0  -4   6 70.2766 33.4039   5
   0   4   6 57.7064 35.2686   2
   0   4  -6 56.9595 32.1840   3
   0  -4  -7 851.957 77.5756   2
   0  -4   7 1060.36 83.9910   4
   0   4  -7 934.779 66.6272   6
   0   4   7 958.105 80.0967   2
   0   4  -7 1230.85 82.7897   3
   0  -4   7 991.358 68.2804   3
   0  -4  -7 1080.84 75.7429   1
   0  -4   8 5102.71 171.491   4
   0  -4  -8 5120.33 155.452   1
   0   4  -8 5047.08 164.477   3
   0   4  -8 5304.10 161.890   6
   0  -4   8 4825.39 157.995   3
   0  -4  -8 4938.31 172.214   2
   0  -4  -9 10871.9 249.573   1
   0  -4   9 10929.9 275.694   4
   0  -4  -9 10775.3 279.981   2
   0   4  -9 11334.9 271.892   3
   0  -4  10 27201.0 508.612   4
   0   4 -10 27784.4 509.947   3
   0  -4 -10 28233.7 528.364   2
   0  -4 -11 6324.11 228.811   2
   0   4 -11 5909.15 211.608   3
   0  -4 -11 6139.40 221.741   3
   0  -4  11 6512.44 221.002   4
   0   4 -12 9531.50 284.638   3
   0  -4 -12 10076.2 300.141   3
   0  -4  12 9521.92 283.253   4
   0   4 -13 1501.31 118.396   3
   0  -4 -13 1326.15 117.686   3
   0  -4  13 1113.31 102.697   4
   0  -4  14 9115.05 295.740   4
   0   4 -14 9193.51 302.328   3
   0  -4 -14 9231.46 307.469   3
   0  -4  15 883.744 102.404   4
   0  -4 -15 990.881 111.990   3
   0   4 -15 691.102 93.2574   3
   0  -4  16 157.022 51.5683   4
   0  -4 -16 249.778 75.4377   3
   0   4 -16 309.313 81.7464   3
   0  -4  17 37.8648 58.0667   4
   0  -4 -17 44.7649 66.0307   3
   0   4 -17 111.260 70.8133   3
   0   4 -18 1121.53 129.481   3
   0  -4 -18 1179.85 136.716   3
   0  -4  18 1144.24 118.597   4
   0  -4 -19 973.984 126.135   3
   0  -4  19 1375.19 141.459   4
   0   4 -19 1178.40 138.224   3
   0  -4 -20 9899.94 391.697   3
   0   4 -20 9123.50 375.633   3
   0  -4  20 9904.77 370.689   4
   0  -4 -21 1968.98 183.185   3
   0  -4  21 1860.69 174.385   4
   0   4 -21 1930.14 181.561   3
   0  -4 -22 9382.72 408.442   3
   0   4 -22 9955.65 416.720   3
   0  -4  22 9541.76 384.748   4
   0   4 -23 2757.10 224.994   3
   0  -4 -23 2661.49 222.722   3
   0  -4  23 3269.02 228.884   4
   0  -4  24 4113.99 265.942   4
   0  -5   0 35.8948 34.9159   7
   0  -5   0-36.4753 21.9551   2
   0  -5   0 20.7950 21.4207   5
   0  -5   0-28.3935 22.1054   3
   0   5   0 9.77241 32.6584   1
   0   5   0 34.7705 23.3995   5
   0   5   0 45.3219 31.2435   7
   0  -5  -1 8758.96 173.986   5
   0   5   1 8630.03 196.456   1
   0  -5  -1 8430.87 165.823   2
   0   5  -1 8837.70 200.262   4
   0  -5   1 8688.10 195.228   7
   0   5  -1 8930.82 168.203   5
   0   5   1 8330.16 163.635   2
   0  -5  -1 8418.74 193.015   7
   0   5  -1 8854.37 196.428   1
   0   5   1 8609.72 171.131   5
   0  -5   1 9084.48 174.583   3
   0   5  -1 8649.99 195.519   7
   0  -5   1 8612.55 168.377   5
   0   5  -2 3654.16 120.569   7
   0   5   2 3860.95 126.146   1
   0   5  -2 3817.82 108.265   3
   0  -5  -2 3687.75 122.266   1
   0   5   2 3956.90 110.904   5
   0  -5   2 3857.44 124.281   7
   0   5   2 3602.59 101.917   2
   0   5  -2 3762.13 103.403   5
   0   5  -2 3939.69 129.200   4
   0  -5  -2 3737.51 123.050   7
   0  -5   2 3739.74 104.009   5
   0  -5   2 3612.34 103.377   3
   0  -5  -2 3669.24 105.214   2
   0   5   3 24625.9 405.810   1
   0   5   3 24814.7 388.919   5
   0   5  -3 25068.8 416.816   4
   0  -5  -3 23648.5 403.689   1
   0   5  -3 25635.7 411.962   7
   0   5  -3 24572.8 378.516   3
   0  -5   3 25144.1 416.260   4
   0   5   3 24536.9 378.890   2
   0  -5  -3 24543.4 380.660   2
   0  -5   3 27309.2 383.758   3
   0   5  -3 25344.6 376.579   5
   0  -5   3 24790.6 405.948   7
   0  -5   3 24340.4 373.565   5
   0  -5  -4 25807.5 401.603   2
   0  -5   4 25778.4 392.124   3
   0   5   4 25910.7 421.179   1
   0   5  -4 26006.9 430.468   4
   0   5   4 22925.2 398.380   5
   0   5  -4 26453.9 398.177   3
   0  -5   4 24977.0 390.228   5
   0  -5  -4 25171.0 417.854   1
   0  -5   4 25841.2 428.775   4
   0   5  -4 24194.3 415.942   7
   0   5   4 25295.7 398.232   2
   0   5  -5 120011. 1516.43   4
   0  -5   5 119336. 1471.10   5
   0  -5   5 119956. 1510.08   4
   0   5  -5 120581. 1470.78   3
   0  -5   5 120821. 1469.82   3
   0  -5  -5 117530. 1483.77   2
   0   5   5 117480. 1482.30   2
   0   5  -5 116925. 1500.20   7
   0  -5  -5 119817. 1494.47   1
   0   5  -6 15244.9 294.265   3
   0  -5   6 15616.9 320.074   4
   0  -5  -6 15301.7 303.202   1
   0  -5   6 15068.9 291.148   3
   0  -5   6 14872.5 292.847   5
   0   5   6 15248.4 307.153   2
   0   5  -6 15378.5 290.220   6
   0  -5  -6 15367.8 306.769   2
   0  -5   7 80061.8 1083.28   4
   0   5   7 76356.0 1072.16   2
   0   5  -7 80971.6 1045.59   6
   0  -5  -7 78101.1 1071.88   2
   0  -5   7 80114.8 1050.50   3
   0   5  -7 76970.4 1051.18   3
   0  -5  -7 79666.2 1057.47   1
   0  -5   7 77909.6 1051.50   5
   0   5  -8 314.004 49.0144   3
   0  -5  -8 254.834 48.0661   2
   0  -5   8 280.396 56.3453   4
   0   5  -8 321.852 46.9329   6
   0  -5   8 373.938 50.1992   3
   0  -5  -9 31672.0 561.097   2
   0   5  -9 30923.0 536.377   3
   0   5  -9 31942.9 527.567   6
   0  -5   9 31271.5 554.321   4
   0  -5  10 613.356 71.6870   4
   0  -5 -10 625.924 77.6174   2
   0   5 -10 586.986 66.8358   3
   0   5 -11 2205.64 127.876   3
   0  -5  11 2625.27 141.501   4
   0  -5 -11 2523.02 145.373   2
   0  -5  12 685.701 83.0963   4
   0  -5 -12 717.878 90.3808   3
   0   5 -12 569.504 76.5266   3
   0  -5  13 1923.86 131.389   4
   0  -5 -13 1938.26 138.527   3
   0   5 -13 2132.65 138.063   3
   0  -5 -14 7919.49 288.443   3
   0   5 -14 8208.53 285.328   3
   0  -5  14 8340.96 286.294   4
   0  -5  15 1415.53 123.628   4
   0   5 -15 1789.57 137.307   3
   0  -5 -15 1616.01 138.146   3
   0   5 -16 6335.22 268.654   3
   0  -5  16 6565.83 267.762   4
   0  -5 -16 6174.04 271.139   3
   0   5 -17 6014.62 272.140   3
   0  -5 -17 5932.90 280.876   3
   0  -5  17 6143.86 266.292   4
   0  -5  18 6547.54 285.244   4
   0   5 -18 6057.43 284.942   3
   0  -5 -18 6132.19 289.604   3
   0  -5 -19 9399.18 373.892   3
   0   5 -19 9215.10 366.282   3
   0  -5  19 9573.81 357.376   4
   0  -5  20 3020.11 206.126   4
   0  -5 -20 3018.34 219.434   3
   0   5 -20 2720.54 204.228   3
   0  -5  21 405.400 95.3648   4
   0  -5 -21 376.019 101.076   3
   0   5 -21 401.408 97.7747   3
   0  -5 -22 559.851 112.822   3
   0   5 -22 701.633 129.922   3
   0  -5  22 470.534 102.065   4
   0   5 -23 1078.96 153.241   3
   0  -5 -23 1426.95 172.950   3
   0  -5  23 1302.11 159.194   4
   0  -5  24 212.796 92.7042   4
   0  -6   0 1570.38 67.0598   2
   0   6   0 1544.53 69.4135   5
   0  -6   0 1535.22 71.7422   3
   0  -6   0 1689.76 71.4529   5
   0   6   0 1542.48 86.8702   1
   0  -6   0 1516.92 85.0940   7
   0   6   0 1562.17 88.0788   4
   0   6   0 1500.63 81.0410   7
   0  -6   1 20040.2 327.749   5
   0  -6  -1 20602.7 367.599   7
   0  -6  -1 22631.7 347.894   5
   0   6  -1 20756.4 326.479   5
   0   6   1 21032.3 331.965   5
   0   6  -1 20065.0 365.431   7
   0   6  -1 22007.7 388.345   4
   0  -6   1 20194.9 333.840   3
   0   6  -1 21616.3 372.472   1
   0  -6   1 20704.1 367.324   7
   0  -6  -1 20641.7 326.109   2
   0  -6   1 20669.2 322.283   2
   0   6   1 21104.1 373.959   1
   0   6  -2 8262.04 205.466   7
   0   6   2 8442.42 209.481   1
   0   6  -2 7915.81 179.803   3
   0  -6  -2 8352.11 179.299   2
   0   6   2 8393.24 183.933   5
   0   6  -2 7990.24 208.607   4
   0  -6   2 8054.54 174.754   5
   0  -6   2 8370.21 207.908   7
   0  -6   2 8481.09 180.598   3
   0   6   2 8178.52 173.713   2
   0  -6  -2 8583.10 209.417   7
   0   6  -2 8178.13 175.370   5
   0   6  -3 38419.1 543.476   5
   0   6  -3 37380.6 584.172   7
   0  -6  -3 38237.2 550.384   2
   0   6   3 38343.8 587.869   1
   0  -6   3 38556.1 588.252   7
   0  -6  -3 38993.2 590.508   1
   0   6  -3 38643.3 551.185   3
   0   6   3 39150.5 548.710   2
   0   6   3 37286.4 554.573   5
   0  -6  -3 39610.5 592.927   7
   0   6  -3 38911.7 597.670   4
   0  -6   3 38271.5 546.746   3
   0  -6   3 38378.7 543.007   5
   0   6   4 620.505 58.6040   5
   0   6   4 615.617 51.4317   2
   0  -6  -4 667.749 64.5022   1
   0   6  -4 639.683 53.2117   3
   0  -6   4 580.336 64.5571   4
   0  -6   4 625.396 50.5897   3
   0  -6  -4 635.802 52.8546   2
   0  -6   4 603.480 50.6459   5
   0   6   4 433.840 54.8468   1
   0   6   5 69.1035 38.8591   5
   0   6   5 7.61358 36.5614   1
   0   6   5 124.327 36.3347   2
   0  -6   5 80.0875 30.7546   5
   0   6  -5 65.6193 31.7416   3
   0  -6  -5 13.7366 30.5285   2
   0  -6   5 61.9925 30.5275   3
   0  -6   6 10033.8 257.374   4
   0   6  -6 10065.7 230.899   3
   0  -6   6 10061.2 229.395   3
   0   6   6 9607.18 237.551   2
   0   6  -6 10103.0 227.800   6
   0  -6   6 9516.17 224.960   5
   0  -6  -6 10145.4 241.054   2
   0  -6   7 22435.9 437.427   4
   0   6  -7 22663.7 408.575   3
   0  -6  -7 23050.4 425.256   2
   0  -6   7 23301.4 408.935   3
   0   6   7 22295.4 421.783   2
   0   6  -7 23111.9 402.927   6
   0  -6   7 22593.4 408.545   5
   0  -6  -8 5096.51 181.154   2
   0   6  -8 5032.34 165.292   6
   0  -6   8 4996.79 184.508   4
   0   6  -8 5015.65 169.692   3
   0  -6   9 11178.7 296.270   4
   0   6  -9 11089.4 280.002   3
   0   6  -9 11355.0 270.943   6
   0  -6  -9 11304.0 296.413   2
   0   6 -10 21123.1 415.228   6
   0   6 -10 20542.3 425.151   3
   0  -6  10 21424.2 450.534   4
   0  -6 -10 20101.2 439.099   2
   0   6 -11 27763.7 533.767   3
   0  -6  11 27961.3 549.251   4
   0  -6 -11 27577.4 551.047   2
   0  -6 -12 30530.3 609.151   2
   0   6 -12 31406.1 594.287   3
   0  -6  12 30183.3 597.856   4
   0  -6 -13 14496.3 393.781   3
   0   6 -13 13789.3 372.176   3
   0  -6  13 13974.3 378.327   4
   0   6 -14 14382.2 395.838   3
   0  -6 -14 15234.3 419.243   3
   0  -6  14 14282.9 394.664   4
   0   6 -15 8271.68 301.792   3
   0  -6 -15 8439.43 312.659   3
   0  -6  15 8591.23 305.255   4
   0  -6  16 210.450 66.7652   4
   0   6 -16 93.7086 59.1096   3
   0  -6 -16 234.025 67.7789   3
   0  -6 -17 40.8272 58.0966   3
   0   6 -17 168.613 76.7774   3
   0  -6  17 91.4493 53.1370   4
   0  -6 -18 475.975 101.598   3
   0  -6  18 639.837 99.7192   4
   0   6 -18 672.098 106.954   3
   0  -6 -19 3226.05 218.436   3
   0  -6  19 3245.42 209.188   4
   0   6 -19 3122.05 214.205   3
   0  -6  20 1778.75 160.006   4
   0   6 -20 1599.14 169.259   3
   0  -6 -20 1685.57 171.527   3
   0  -6  21 11467.8 422.263   4
   0   6 -21 11494.3 443.093   3
   0  -6 -21 10852.7 435.913   3
   0   6 -22 1850.35 191.415   3
   0  -6 -22 1878.28 192.629   3
   0  -6  22 1757.60 174.277   4
   0  -6  23 5824.20 313.718   4
   0   6 -23 5059.00 308.883   3
   0  -6  24 2542.27 216.593   4
   0  -7   0 25.6207 28.5241   2
   0  -7   0 28.7648 34.3108   5
   0  -7   0 20.2211 39.2909   7
   0   7   0 21.0059 24.7226   5
   0   7   0 121.994 54.9875   1
   0  -7   0 20.1801 27.7600   3
   0  -7   1 28.2401 25.9609   2
   0   7  -1 4.86367 25.6179   5
   0  -7  -1 31.6138 29.4445   3
   0  -7   1-11.9214 28.5111   5
   0  -7   1 19.2424 36.9594   7
   0   7   1-10.1828 28.2761   5
   0  -7  -1 8.03097 24.3363   5
   0   7  -1 30.0276 40.2645   1
   0   7   1-12.9079 37.4418   1
   0  -7   1 19.2198 26.7758   3
   0  -7  -1 6.67763 25.2113   2
   0  -7  -1-4.46745 37.3595   7
   0   7  -2 11209.3 223.984   5
   0   7   2 11387.3 267.554   1
   0  -7   2 11548.0 266.816   7
   0   7   2 10911.9 220.364   2
   0  -7   2 11309.1 229.742   5
   0  -7  -2 11145.0 226.994   2
   0  -7   2 10965.9 228.357   3
   0  -7  -2 11199.9 264.323   7
   0   7  -2 11880.3 267.862   1
   0   7   2 11077.5 233.019   5
   0   7   3 281.958 38.8332   2
   0   7  -3 303.560 42.4541   3
   0   7   3 296.466 41.4356   5
   0  -7   3 273.692 37.2900   5
   0  -7  -3 335.882 56.4396   7
   0  -7   3 229.924 33.2020   3
   0   7   3 304.121 56.3863   1
   0  -7   3 382.045 58.4819   7
   0  -7  -3 313.302 44.9416   2
   0   7  -3 201.125 38.1100   5
   0   7   4 60041.2 828.099   5
   0   7  -4 60772.6 816.238   3
   0   7   4 58263.4 810.181   2
   0  -7   4 59573.8 808.451   5
   0  -7   4 59072.0 809.090   3
   0  -7  -4 59804.4 862.473   7
   0  -7  -4 59266.7 817.297   2
   0   7   4 59587.0 862.939   1
   0   7   5 1911.44 109.282   1
   0   7   5 1829.68 92.0211   2
   0   7  -5 1649.14 86.7417   3
   0  -7   5 1847.01 89.1433   5
   0  -7   5 2014.14 93.1594   3
   0  -7  -5 1860.43 97.8258   2
   0  -7   5 1797.87 110.858   4
   0   7   5 1881.64 99.7184   5
   0  -7  -6 69349.4 955.809   2
   0  -7   6 68726.5 993.161   4
   0  -7   6 67901.3 930.789   5
   0   7   6 66544.1 941.746   2
   0   7   6 65984.7 953.373   5
   0  -7   6 69157.7 932.270   3
   0   7  -6 67311.6 933.361   3
   0  -7  -7 231.511 50.4246   2
   0   7  -7 167.791 46.2835   3
   0   7  -7 209.208 39.5850   6
   0  -7   7 258.716 57.6119   4
   0  -7   7 205.747 40.5896   3
   0   7  -8 65577.4 951.843   3
   0  -7   8 68047.8 1004.04   4
   0   7  -8 67511.8 947.932   6
   0  -7  -8 67786.0 980.909   2
   0   7  -9 58.8176 42.6290   3
   0  -7   9 10.9791 45.5849   4
   0   7  -9 36.6289 42.3092   6
   0  -7  -9 43.1562 40.5144   2
   0   7 -10 26868.3 510.503   3
   0  -7 -10 26675.8 532.075   2
   0   7 -10 26553.2 493.004   6
   0  -7  10 26852.0 536.872   4
   0   7 -11 334.053 59.6814   6
   0  -7 -11 226.519 64.1546   2
   0  -7  11 181.944 52.3800   4
   0   7 -11 308.771 66.7139   3
   0   7 -12 146.555 51.7255   3
   0  -7  12 191.586 66.7610   4
   0  -7 -12 91.0311 53.7490   2
   0  -7 -13 1086.62 113.262   2
   0  -7 -13 935.307 109.440   3
   0   7 -13 878.509 92.3834   3
   0  -7  13 951.492 103.349   4
   0   7 -14 5913.17 247.752   3
   0  -7  14 5985.10 250.602   4
   0  -7 -14 5941.38 256.186   3
   0  -7  15 7746.74 296.172   4
   0  -7 -15 7914.08 307.918   3
   0   7 -15 7296.67 287.168   3
   0  -7 -16 3374.44 205.780   3
   0   7 -16 3732.52 210.884   3
   0  -7  16 3357.71 200.700   4
   0  -7  17 2642.08 183.720   4
   0   7 -17 2487.55 178.367   3
   0  -7 -17 2643.24 189.741   3
   0  -7  18 5401.35 269.168   4
   0  -7 -18 5681.15 287.173   3
   0   7 -18 5033.42 265.016   3
   0  -7  19 551.879 94.4507   4
   0   7 -19 382.507 85.8003   3
   0  -7 -19 521.554 106.361   3
   0   7 -20 1718.12 180.741   3
   0  -7 -20 1636.14 166.555   3
   0  -7  20 1981.98 180.220   4
   0  -7  21 225.832 90.3584   4
   0  -7 -21 97.0203 78.4186   3
   0   7 -21 231.025 90.2408   3
   0   7 -22 320.516 111.365   3
   0  -7  22 437.747 106.923   4
   0  -7 -22 230.747 95.4918   3
   0  -7  23 615.983 117.420   4
   0   7 -23 564.547 117.273   3
   0   8   0 38437.3 618.228   1
   0   8   0 37335.5 547.432   5
   0  -8   0 36855.8 607.940   7
   0  -8   0 37093.9 541.702   2
   0  -8   0 36982.2 554.783   5
   0  -8   0 36816.3 561.892   3
   0   8   1 12867.9 258.480   5
   0  -8  -1 13245.9 273.877   3
   0   8  -1 13226.2 304.179   1
   0  -8   1 13409.7 305.483   7
   0   8   1 12903.2 306.172   1
   0  -8   1 12606.2 263.394   3
   0  -8  -1 13567.3 307.566   7
   0  -8   1 13255.4 262.524   5
   0  -8  -1 12870.5 265.943   5
   0  -8  -1 12689.9 252.323   2
   0   8  -1 12915.8 255.756   5
   0  -8   1 12765.5 249.729   2
   0   8  -2 10328.3 221.456   5
   0  -8  -2 10447.0 264.929   7
   0   8   2 10084.9 224.904   5
   0  -8   2 9568.60 221.805   3
   0  -8   2 9921.65 213.955   2
   0   8  -2 9878.75 258.946   1
   0  -8   2 10508.1 264.264   7
   0   8   2 10409.5 266.906   1
   0  -8   2 9872.67 220.383   5
   0  -8  -2 10047.9 220.855   2
   0   8   3 25251.5 429.350   5
   0   8   3 25315.4 475.023   1
   0  -8  -3 25579.2 472.159   7
   0  -8   3 24945.1 468.956   7
   0   8  -3 25717.2 418.370   5
   0   8   3 24917.6 413.212   2
   0  -8   3 25584.2 422.488   3
   0  -8   3 25455.5 417.225   5
   0  -8  -3 25116.2 422.392   2
   0   8  -3 25551.0 468.073   1
   0   8   4 3069.40 119.013   2
   0   8  -4 3230.35 121.672   5
   0  -8  -4 3172.99 125.125   2
   0   8   4 3415.51 151.873   1
   0  -8   4 3513.76 125.636   3
   0   8   4 3369.55 131.153   5
   0  -8  -4 3143.06 144.746   7
   0  -8   4 3159.65 118.561   5
   0   8  -4 3369.21 127.892   3
   0  -8  -5 637.596 64.2841   2
   0  -8  -5 818.997 82.1505   7
   0  -8   5 694.313 59.1484   3
   0   8   5 720.535 62.4248   2
   0  -8   5 713.069 62.6540   5
   0   8   5 748.149 69.1527   5
   0   8   5 873.622 82.7363   1
   0   8  -5 677.368 63.4756   3
   0   8   6 9468.69 265.804   1
   0  -8   6 9286.30 274.198   4
   0   8  -6 9576.25 238.135   3
   0   8   6 8960.59 246.502   5
   0  -8   6 9294.28 233.072   3
   0  -8  -6 9094.89 242.122   2
   0   8   7 21732.4 436.272   5
   0   8  -7 22095.4 411.805   6
   0  -8  -7 20865.0 420.945   2
   0  -8   7 22031.1 461.259   4
   0   8  -7 21612.2 412.166   3
   0  -8   8 14208.5 361.336   4
   0   8  -8 13726.2 314.274   6
   0   8   8 14122.0 344.330   5
   0   8  -8 14592.1 327.233   3
   0  -8  -8 14019.6 335.168   2
   0  -8  -9 16290.6 377.864   2
   0  -8   9 16111.1 395.601   4
   0   8  -9 15622.8 349.085   6
   0   8  -9 15685.1 357.629   3
   0  -8 -10 23204.1 491.760   2
   0   8 -10 23857.6 476.169   3
   0  -8  10 22159.8 498.100   4
   0   8 -10 23373.5 458.204   6
   0  -8  11 11040.1 334.581   4
   0   8 -11 11810.1 307.372   6
   0   8 -11 11117.4 313.763   3
   0  -8 -11 11297.5 328.783   2
   0  -8 -12 30541.4 618.120   2
   0  -8  12 29831.4 616.638   4
   0   8 -12 29524.2 590.598   3
   0  -8  13 9921.67 328.632   4
   0  -8 -13 9824.96 328.742   2
   0   8 -13 9950.36 318.237   3
   0  -8  14 14338.4 417.325   4
   0  -8 -14 15545.0 437.670   3
   0   8 -14 14720.7 410.532   3
   0  -8 -15 7183.65 299.900   3
   0   8 -15 7223.51 288.235   3
   0  -8  15 7266.41 293.893   4
   0  -8  16 976.379 121.991   4
   0   8 -16 800.705 105.552   3
   0  -8 -16 1013.04 123.854   3
   0   8 -17 159.994 74.8607   3
   0  -8  17 397.460 91.6761   4
   0  -8 -17 163.899 77.2791   3
   0   8 -18 2130.67 177.271   3
   0  -8  18 1882.41 164.135   4
   0  -8 -18 1877.89 176.762   3
   0   8 -19 2527.63 196.428   3
   0  -8  19 2538.86 199.267   4
   0  -8 -19 2505.86 205.476   3
   0  -8  20 4895.47 278.165   4
   0   8 -20 4503.54 278.533   3
   0  -8 -20 4331.04 270.514   3
   0   8 -21 6403.47 336.995   3
   0  -8 -21 6044.29 328.710   3
   0  -8  21 6023.06 311.883   4
   0  -8  22 6634.21 333.279   4
   0   8 -22 6023.91 334.970   3
   0  -8  23 5858.30 322.269   4
   0   8 -23 5348.92 321.221   3
   0  -9   0 71.7585 35.2240   3
   0  -9   0-1.43210 27.1092   2
   0  -9   0 18.7820 29.9179   5
   0   9   0 11.8661 30.2808   5
   0   9   0-58.8529 47.7542   1
   0  -9   0-34.0358 44.4190   7
   0  -9   1 3543.46 156.005   7
   0  -9  -1 3740.48 159.870   7
   0   9  -1 3580.60 158.888   1
   0  -9  -1 3502.44 135.972   3
   0  -9   1 3436.63 120.978   2
   0   9   1 3688.05 161.153   1
   0  -9   1 3574.49 131.913   3
   0   9  -1 3457.88 124.957   5
   0  -9   1 3507.03 127.931   5
   0   9   1 3527.48 128.355   5
   0  -9  -1 3457.57 122.521   2
   0   9  -2 374.074 61.6064   1
   0  -9   2 458.253 67.7190   7
   0   9   2 461.415 50.9801   5
   0  -9  -2 504.865 71.2858   7
   0   9   2 420.828 66.8003   1
   0   9  -2 447.704 51.7306   5
   0  -9  -2 628.407 63.9047   3
   0  -9   2 542.264 54.2272   3
   0  -9  -2 417.860 47.9543   2
   0  -9   2 476.295 49.5238   5
   0  -9   2 532.724 51.8546   2
   0  -9  -3 23887.2 476.224   7
   0  -9   3 23642.9 417.351   3
   0   9   3 24118.1 476.390   1
   0  -9   3 23493.6 472.389   7
   0   9  -3 23989.3 413.110   5
   0  -9   3 23944.7 405.803   2
   0  -9  -3 23985.4 419.014   2
   0   9  -3 25230.1 476.673   1
   0  -9   3 23995.6 416.056   5
   0   9   3 23769.2 424.227   5
   0  -9  -4 225.593 44.7965   2
   0  -9  -4 170.600 53.6285   7
   0   9   4 143.962 41.6051   5
   0   9  -4 106.929 32.8500   5
   0  -9   4 99.3617 30.7144   3
   0  -9   4 189.690 40.5533   5
   0   9   4 91.2844 29.0720   2
   0   9   4 167.149 55.5052   1
   0   9  -4 178.183 48.4083   1
   0   9  -5 68882.2 955.927   3
   0  -9  -5 66880.8 956.527   2
   0   9   5 68515.4 969.059   5
   0  -9   5 66357.4 940.864   3
   0   9   5 70052.5 1025.55   1
   0  -9  -5 67485.1 1015.39   7
   0  -9  -6 40.2984 48.3126   7
   0   9   6 46.7018 45.3875   5
   0   9   6 99.5477 56.2648   1
   0   9  -6 3.40441 35.1947   3
   0  -9  -6 54.0977 34.9215   2
   0   9  -7 50645.3 784.075   3
   0   9   7 51397.9 808.484   5
   0  -9   7 52117.4 855.753   4
   0  -9  -7 51762.0 800.950   2
   0  -9  -8 89.7603 46.6031   2
   0  -9   8 117.816 61.2243   4
   0   9  -8 49.5843 36.5432   6
   0   9   8 85.7184 53.5479   5
   0   9  -8 100.062 40.4902   3
   0   9   9 26358.3 533.983   5
   0  -9   9 26379.6 557.940   4
   0   9  -9 25838.4 493.727   6
   0  -9  -9 26065.2 522.753   2
   0   9  -9 26138.0 504.475   3
   0   9  10 38.5689 53.2762   5
   0   9 -10 8.71408 40.1107   3
   0  -9 -10 35.2315 46.1116   2
   0   9 -10 59.1620 43.4052   6
   0  -9  10 57.8150 54.2301   4
   0   9 -11 1094.50 94.0745   6
   0  -9  11 1016.41 112.435   4
   0  -9 -11 1138.06 109.290   2
   0   9 -11 998.789 97.3713   3
   0   9  11 1077.24 107.372   5
   0  -9 -12 199.668 59.8956   2
   0  -9  12 196.018 71.8232   4
   0   9 -12 110.067 52.1549   3
   0   9 -12 206.873 56.5748   6
   0  -9  13 346.737 80.0030   4
   0   9 -13 268.914 69.3760   3
   0  -9 -13 267.297 70.2769   2
   0  -9  14 657.000 97.8583   4
   0  -9 -14 566.648 97.4498   3
   0   9 -14 608.244 85.6876   3
   0  -9  15 8908.91 335.624   4
   0   9 -15 8377.06 316.588   3
   0  -9 -15 8675.71 335.205   3
   0  -9  16 119.751 67.3334   4
   0   9 -16 145.459 74.6340   3
   0  -9 -16 85.7422 63.6634   3
   0  -9  17 6654.05 305.182   4
   0   9 -17 6346.68 296.142   3
   0  -9 -17 6794.57 313.145   3
   0  -9 -18 97.0707 77.1273   3
   0  -9  18-3.36244 71.6909   4
   0   9 -18 38.0779 60.0745   3
   0  -9 -19 7373.32 346.125   3
   0   9 -19 6449.91 320.809   3
   0  -9  19 6120.03 308.491   4
   0  -9 -20 223.903 76.8569   3
   0   9 -20 176.507 97.7207   3
   0  -9  20 231.337 88.7552   4
   0  -9  21 757.732 132.809   4
   0  -9 -21 752.695 133.309   3
   0   9 -21 827.564 145.265   3
   0   9 -22 79.6765 101.712   3
   0  -9  22 27.1947 70.8088   4
   0 -10   0 20949.2 392.479   5
   0  10   0 21154.5 451.979   1
   0 -10   0 21193.1 378.272   2
   0  10   0 20974.3 381.779   5
   0 -10   0 20714.3 445.238   7
   0  10   1 16272.2 388.483   1
   0 -10   1 16047.1 330.041   5
   0 -10  -1 16767.5 326.099   2
   0  10   1 16837.1 330.388   5
   0  10  -1 16176.4 383.663   1
   0 -10   1 16158.2 384.682   7
   0  10  -1 16204.5 322.842   5
   0 -10   1 16736.0 321.355   2
   0 -10  -1 17181.3 393.133   7
   0  10   2 18730.0 424.759   1
   0 -10   2 18833.1 418.751   7
   0 -10  -2 19025.8 359.675   2
   0  10  -2 18965.7 356.204   5
   0 -10   2 18232.8 357.692   5
   0  10  -2 18791.9 418.723   1
   0  10   2 18394.9 360.543   5
   0 -10  -2 18713.7 420.424   7
   0 -10   2 18759.5 350.387   2
   0 -10   3 7408.21 198.300   2
   0  10   3 7753.90 215.074   5
   0 -10   3 7582.10 250.503   7
   0  10  -3 7345.34 202.750   5
   0  10   3 7855.64 257.448   1
   0 -10  -3 7384.16 206.121   2
   0  10  -3 7613.55 248.594   1
   0 -10  -3 7262.26 246.208   7
   0  10   4 5095.18 178.661   5
   0 -10  -4 5267.33 208.669   7
   0  10   4 5370.15 212.242   1
   0  10  -4 4869.94 196.753   1
   0 -10  -4 5042.95 171.198   2
   0  10  -4 5010.53 167.120   5
   0  10   5 452.369 73.0733   1
   0  10  -5 465.546 73.3191   1
   0 -10  -5 603.578 82.2162   7
   0 -10  -5 579.773 65.1127   2
   0  10   5 538.063 64.7365   5
   0  10  -6 716.194 85.9424   1
   0  10  -6 689.781 72.4855   3
   0  10   6 685.788 75.5643   5
   0  10   6 744.985 89.1153   1
   0 -10  -6 730.470 90.0708   7
   0 -10  -6 678.468 72.3625   2
   0  10  -7 3264.15 147.704   3
   0  10   7 3152.34 155.092   5
   0 -10  -7 3184.74 150.179   2
   0 -10  -7 2913.45 163.760   7
   0  10  -8 11561.1 300.599   3
   0  10  -8 11472.2 297.203   6
   0 -10  -8 10689.2 302.584   2
   0  10   8 10911.3 311.691   5
   0  10   9 7321.97 256.792   5
   0  10  -9 7007.68 237.084   3
   0 -10  -9 7025.54 245.540   2
   0  10  -9 7260.29 234.675   6
   0 -10   9 7066.31 272.218   4
   0  10 -10 10391.4 293.014   6
   0 -10  10 10139.1 337.997   4
   0  10 -10 10286.6 302.283   3
   0  10  10 10369.0 323.627   5
   0 -10 -10 9964.66 311.144   2
   0  10 -11 13763.6 354.874   6
   0  10 -11 13922.0 370.868   3
   0 -10  11 14156.1 414.297   4
   0 -10 -11 14242.3 388.032   2
   0  10  11 13775.5 395.350   5
   0 -10  12 14731.7 431.908   4
   0  10  12 14890.9 424.447   5
   0  10 -12 14282.3 389.714   3
   0  10 -12 14798.4 377.380   6
   0 -10 -12 14847.6 411.136   2
   0 -10  13 5716.75 267.420   4
   0  10 -13 6071.54 252.369   3
   0  10  13 6144.16 271.612   5
   0 -10 -13 6140.66 263.737   2
   0  10 -14 11335.4 368.230   3
   0  10  14 11173.9 387.857   5
   0 -10  14 11140.0 385.660   4
   0 -10 -15 1981.82 162.836   3
   0 -10  15 1960.69 165.842   4
   0  10 -15 2260.13 172.318   3
   0  10  15 2146.54 179.788   5
   0 -10 -16 1014.93 131.366   3
   0 -10  16 999.883 127.883   4
   0  10  16 1103.23 143.541   5
   0  10 -16 937.614 120.135   3
   0 -10 -17 117.775 77.0415   3
   0  10 -17 87.0614 67.4160   3
   0 -10  17 73.5262 71.6662   4
   0 -10  18 777.795 121.222   4
   0  10 -18 769.610 119.709   3
   0 -10 -18 772.687 124.549   3
   0 -10  19 1644.55 172.067   4
   0  10 -19 1509.00 162.970   3
   0 -10 -19 1654.10 173.272   3
   0  10 -20 1716.90 174.899   3
   0 -10 -20 2254.02 203.991   3
   0 -10  20 2253.23 198.008   4
   0  10 -21 3441.16 253.170   3
   0 -10  21 3416.61 248.453   4
   0  11   0 14.5902 30.9306   5
   0 -11   0 51.7967 54.7025   7
   0  11   0-7.23450 48.4604   1
   0 -11   0 13.7746 27.3781   2
   0  11   1 75.7538 52.5506   1
   0 -11  -1 114.918 51.6771   7
   0  11   1 130.237 36.3423   5
   0 -11   1 115.369 54.8991   7
   0  11  -1 184.297 42.1945   5
   0 -11   1 102.419 34.0999   2
   0  11  -1 55.2299 49.7084   1
   0 -11  -1 114.693 34.8833   2
   0 -11  -2 10360.8 312.407   7
   0 -11  -2 10345.4 254.737   2
   0  11   2 10668.7 262.201   5
   0 -11   2 10582.0 313.976   7
   0  11  -2 10510.9 311.995   1
   0  11   2 10419.2 315.184   1
   0  11  -2 10677.4 257.373   5
   0 -11   2 10404.4 249.869   2
   0  11  -3 56.1992 53.5722   1
   0 -11   3 42.5849 28.8529   2
   0 -11   3-52.1511 56.1175   7
   0 -11  -3 80.6648 60.4559   7
   0  11  -3 26.6180 33.8974   5
   0  11   3-8.55928 40.9884   5
   0 -11  -3 63.7590 35.0670   2
   0  11   3 13.8400 56.5601   1
   0 -11   4 22710.7 420.884   2
   0  11   4 22292.8 500.705   1
   0 -11  -4 21930.1 430.355   2
   0  11  -4 23650.9 500.523   1
   0 -11  -4 24128.6 511.732   7
   0  11   4 22576.6 441.046   5
   0 -11  -5 1227.70 112.837   7
   0  11   5 1015.21 102.304   1
   0  11   5 1239.70 95.2144   5
   0  11  -5 1089.77 102.279   1
   0 -11  -5 1098.98 87.5913   2
   0 -11  -6 35592.8 617.896   2
   0  11   6 36697.5 690.661   1
   0 -11  -6 35336.7 681.424   7
   0  11  -6 34265.4 655.215   1
   0  11   6 35261.9 625.085   5
   0 -11  -7 1001.75 91.9480   2
   0 -11  -7 854.771 99.3262   7
   0  11  -7 1227.56 111.408   1
   0  11  -7 993.675 88.4681   3
   0  11   7 1118.05 101.578   5
   0 -11  -8 20588.2 448.412   2
   0  11  -8 19788.4 430.328   6
   0  11  -8 19390.8 459.519   1
   0  11  -8 20619.4 438.477   3
   0  11   8 19511.2 448.550   5
   0 -11  -8 19823.2 482.453   7
   0 -11  -9 18.1378 51.7514   7
   0  11  -9 64.6219 44.2326   6
   0 -11  -9 70.9851 45.7320   2
   0  11   9 47.1535 47.9255   5
   0  11  -9 66.2496 47.7247   3
   0  11 -10 4912.98 201.797   6
   0  11 -10 4687.64 199.455   3
   0  11  10 4588.07 213.927   5
   0 -11 -10 4837.39 215.074   2
   0 -11  11 59.7386 62.3960   4
   0  11 -11 250.751 64.3775   6
   0  11  11 319.292 75.4564   5
   0 -11 -11 217.179 59.0017   2
   0  11 -11 286.007 67.3084   3
   0  11 -12 283.438 66.4716   6
   0  11 -12 318.509 71.3969   3
   0 -11 -12 391.370 78.4591   2
   0  11  12 546.691 96.3735   5
   0 -11  12 386.839 94.8469   4
   0 -11  13 401.043 92.2036   4
   0  11  13 450.568 92.1268   5
   0 -11 -13 370.462 87.1837   2
   0  11 -13 362.619 76.0357   3
   0  11  14 5184.25 265.643   5
   0  11 -14 5598.16 257.029   3
   0 -11  14 5270.15 271.444   4
   0 -11 -15 3197.27 214.931   3
   0  11 -15 3346.05 204.414   3
   0 -11  15 3406.31 223.509   4
   0  11  15 3664.36 234.286   5
   0  11  16 9976.09 395.561   5
   0 -11  16 9201.67 378.701   4
   0  11 -16 9473.61 361.480   3
   0 -11 -16 8883.44 367.872   3
   0 -11 -17 2254.44 192.296   3
   0  11  17 2408.27 212.311   5
   0 -11  17 2040.41 186.029   4
   0  11 -17 2095.74 177.625   3
   0 -11  18 8177.99 374.756   4
   0  11  18 9102.97 403.425   5
   0  11 -18 8646.08 370.252   3
   0 -11 -18 8901.84 387.541   3
   0 -11 -19 754.286 116.815   3
   0 -11  19 678.149 126.045   4
   0  11  19 610.787 137.535   5
   0 -11  20 2278.97 210.301   4
   0  11  20 2539.60 235.419   5
   0 -12   0 488.525 55.8146   2
   0 -12   0 506.364 85.3578   7
   0  12   0 554.350 66.4684   5
   0  12   0 457.345 82.8142   1
   0 -12  -1 34730.6 676.216   7
   0 -12   1 35283.7 677.383   7
   0  12  -1 34104.3 673.563   1
   0  12  -1 34777.6 578.496   5
   0  12   1 34681.6 582.520   5
   0 -12   1 35554.7 577.508   2
   0  12   1 34882.4 682.212   1
   0 -12  -1 36526.9 585.571   2
   0 -12   2 209.971 64.2058   7
   0 -12  -2 197.078 66.5724   7
   0  12   2 223.672 46.7381   5
   0 -12   2 169.229 39.0454   2
   0  12   2 346.149 73.8216   1
   0  12  -2 189.392 45.1813   5
   0 -12  -2 168.390 44.5467   2
   0  12  -2 211.623 66.1061   1
   0  12  -3 24803.3 544.272   1
   0  12   3 25024.8 475.298   5
   0 -12  -3 24987.7 552.557   7
   0  12  -3 24886.6 462.835   5
   0  12   3 25454.8 559.410   1
   0 -12  -3 25752.4 473.155   2
   0 -12   3 25960.2 463.383   2
   0 -12   3 25035.2 548.666   7
   0  12  -4 534.076 79.8675   1
   0  12   4 472.299 83.7834   1
   0 -12   4 355.343 53.7366   2
   0 -12  -4 540.570 65.9388   2
   0 -12  -4 561.342 90.8995   7
   0  12   4 455.530 63.6512   5
   0  12  -5 1993.67 139.172   1
   0  12   5 1913.69 143.141   1
   0 -12   5 1875.10 108.637   2
   0 -12  -5 1930.37 144.594   7
   0 -12  -5 1931.17 117.425   2
   0  12   5 1778.74 116.293   5
   0  12   6 4117.07 181.913   5
   0 -12  -6 3787.54 200.926   7
   0  12  -6 3828.53 196.235   1
   0  12   6 3888.13 205.280   1
   0 -12  -6 4121.84 176.802   2
   0 -12  -7 14.5191 38.1154   2
   0  12  -7 2.41112 50.7897   1
   0  12   7-19.8857 51.7800   5
   0 -12  -7 27.5648 55.5363   7
   0  12  -8 7910.46 286.358   1
   0 -12  -8 7284.91 253.540   2
   0 -12  -8 7626.64 295.199   7
   0  12  -8 7506.79 252.930   6
   0  12  -8 7269.09 248.668   3
   0  12   8 7536.89 265.844   5
   0  12   9 2198.30 147.933   5
   0  12  -9 2221.31 138.006   6
   0  12  -9 2219.88 154.553   1
   0  12  -9 2260.46 138.104   3
   0 -12  -9 2607.43 175.785   7
   0 -12  -9 2248.74 144.013   2
   0  12 -10 14283.0 382.514   3
   0  12 -10 14867.9 410.157   1
   0  12  10 14724.5 408.236   5
   0 -12 -10 14136.2 392.627   2
   0 -12 -10 13564.1 418.765   7
   0  12 -10 14837.3 380.268   6
   0  12 -11 7340.28 270.390   3
   0 -12 -11 7071.67 273.883   2
   0  12 -11 7160.93 259.252   6
   0  12  11 6853.03 279.952   5
   0 -12 -11 6994.98 295.801   7
   0  12 -11 6991.69 275.530   1
   0  12  12 3740.08 217.400   5
   0  12 -12 3674.86 188.100   6
   0 -12 -12 3807.77 206.599   2
   0  12 -12 3203.40 188.256   1
   0  12 -12 3774.94 200.184   3
   0  12  13 9072.17 348.187   5
   0  12 -13 9078.03 307.335   6
   0 -12 -13 8646.93 330.002   2
   0  12 -13 8965.39 321.258   3
   0 -12  14 2303.98 187.583   4
   0  12  14 2669.39 201.172   5
   0  12 -14 2363.73 166.718   3
   0  12  15 2425.04 197.974   5
   0  12 -15 2474.83 178.309   3
   0 -12  15 2785.03 218.486   4
   0 -12 -15 2561.64 194.452   3
   0  12 -16 157.470 75.5331   3
   0 -12  16 70.7265 73.2236   4
   0 -12 -16 316.019 91.6037   3
   0  12  16 54.5739 75.1927   5
   0 -12  17 539.318 119.956   4
   0  12  17 883.935 143.825   5
   0 -12 -17 844.849 136.509   3
   0 -12  18 209.411 97.1169   4
   0 -12 -18 205.478 72.9380   3
   0  12  18 216.250 107.684   5
   0 -12 -19 3369.12 247.287   3
   0 -12  19 3454.41 255.932   4
   0  13   0 17.9799 56.3128   1
   0 -13   0 61.2701 57.0244   7
   0 -13   0-56.2566 33.1328   2
   0  13   0 7.39204 35.2223   5
   0  13   1 4936.94 182.114   5
   0 -13   1 4509.22 221.553   7
   0  13  -1 4819.37 177.956   5
   0 -13  -1 4924.85 177.735   2
   0 -13  -1 4991.89 230.650   7
   0  13   1 5107.27 235.567   1
   0  13  -1 5069.32 234.241   1
   0 -13   1 4942.76 175.103   2
   0 -13   2 362.131 53.5150   2
   0 -13  -2 339.424 51.6702   2
   0 -13   2 352.144 73.6287   7
   0 -13  -2 411.331 81.9007   7
   0  13  -2 359.228 56.6431   5
   0  13  -2 423.227 87.6800   1
   0  13   2 333.529 59.4267   5
   0  13   2 337.905 75.7614   1
   0  13  -3 9500.82 260.688   5
   0 -13  -3 9750.18 266.265   2
   0 -13  -3 9341.50 327.032   7
   0 -13   3 10068.9 336.961   7
   0 -13   3 9542.10 256.433   2
   0  13  -3 9838.43 330.389   1
   0  13   3 10263.2 341.453   1
   0  13   3 9604.28 270.564   5
   0 -13  -4 2302.22 126.729   2
   0  13   4 2322.00 132.352   5
   0  13   4 2148.60 161.324   1
   0 -13  -4 2462.24 169.881   7
   0 -13   4 2169.34 118.468   2
   0  13  -4 2169.68 155.254   1
   0 -13  -5 15221.1 428.481   7
   0 -13   5 15006.5 344.029   2
   0  13   5 15428.3 439.454   1
   0 -13  -5 14405.8 353.759   2
   0  13  -5 15266.7 423.809   1
   0  13   5 14952.4 366.466   5
   0  13   6 693.586 85.7679   5
   0 -13   6 648.882 72.6839   2
   0 -13  -6 681.267 80.6030   2
   0  13  -6 779.559 100.389   1
   0 -13  -6 688.014 97.0456   7
   0 -13  -7 13945.2 361.152   2
   0  13   7 13571.0 365.749   5
   0 -13  -7 14541.8 426.977   7
   0  13  -7 13546.9 400.309   1
   0 -13   7 13734.2 341.140   2
   0 -13  -8 1283.46 131.493   7
   0 -13  -8 1231.91 106.626   2
   0  13  -8 1127.21 119.008   1
   0  13  -8 1330.08 115.263   6
   0  13   8 929.703 100.984   5
   0  13   9 3768.37 196.536   5
   0 -13  -9 3719.81 188.585   2
   0  13  -9 3568.03 181.206   6
   0  13  -9 4085.17 215.259   1
   0 -13  -9 3708.06 216.659   7
   0  13 -10 228.179 72.9370   6
   0  13 -10 151.574 54.9213   3
   0  13 -10 175.610 72.2035   1
   0 -13 -10 320.046 74.3351   2
   0 -13 -10 275.776 83.6874   7
   0  13  10 364.289 83.6311   5
   0  13 -11 30.2875 46.2800   6
   0  13 -11-50.2163 49.5896   3
   0 -13 -11 0.60109 50.9741   2
   0  13 -11-51.8111 70.2455   1
   0  13  11 109.671 70.8164   5
   0 -13 -11 16.6748 63.0877   7
   0  13  12 1164.90 140.486   5
   0  13 -12 1250.60 131.172   1
   0  13 -12 1134.42 115.040   6
   0 -13 -12 1469.86 137.047   2
   0 -13 -12 1376.92 146.642   7
   0  13 -12 1389.27 127.416   3
   0  13  13 4236.96 240.476   5
   0 -13 -13 4272.47 250.244   7
   0 -13 -13 4185.56 225.670   2
   0  13 -13 4395.25 233.506   1
   0  13  14 5231.92 281.187   5
   0 -13 -14 5080.94 277.135   7
   0  13 -14 4727.47 243.653   1
   0 -13 -15 7703.93 351.071   7
   0  13 -15 7599.69 315.285   1
   0  13  15 7735.01 350.153   5
   0 -13 -15 7613.67 343.659   3
   0  13  16 5741.26 311.642   5
   0 -13 -16 5652.02 302.133   3
   0  13 -16 5747.13 273.114   1
   0  13  17 8982.02 404.309   5
   0 -13 -17 9039.00 390.951   3
   0 -13 -18 4473.30 282.138   3
   0  13  18 4292.35 287.476   5
   0  14   0 45837.8 870.625   1
   0 -14   0 45928.4 864.379   7
   0  14   0 45965.7 737.541   5
   0 -14   0 45280.2 724.707   2
   0  14   1 1943.53 118.746   5
   0 -14  -1 1683.63 107.316   2
   0 -14   1 1584.16 139.662   7
   0 -14   1 1771.90 107.292   2
   0  14  -1 1728.69 111.756   5
   0  14   1 1589.19 143.857   1
   0 -14  -1 1696.23 145.846   7
   0  14  -1 1762.47 150.482   1
   0 -14  -2 25952.6 491.975   2
   0  14   2 25913.3 500.825   5
   0  14  -2 24914.6 594.037   1
   0  14  -2 25780.9 492.720   5
   0 -14   2 25647.4 482.840   2
   0  14   2 26379.4 612.313   1
   0 -14   2 25132.8 595.265   7
   0 -14  -2 26417.8 607.662   7
   0 -14   3 24.6736 60.9820   7
   0 -14   3 2.76428 32.6525   2
   0 -14  -3-1.23451 36.0263   2
   0 -14  -3 13.6997 68.1185   7
   0  14  -3-7.05896 62.3760   1
   0  14   3-19.6779 66.8727   1
   0  14   3-43.1496 48.4809   5
   0 -14   4 3704.44 159.664   2
   0  14  -4 3914.11 216.390   1
   0  14   4 3961.59 222.940   1
   0 -14  -4 3967.15 170.944   2
   0  14   4 3813.39 174.421   5
   0 -14  -4 3392.72 205.792   7
   0  14  -5 745.885 106.552   1
   0 -14   5 679.572 74.3870   2
   0 -14  -5 701.703 103.845   7
   0  14   5 698.500 84.2116   5
   0 -14  -5 738.043 79.7841   2
   0  14   5 766.276 104.317   1
   0 -14  -6 218.278 79.3418   7
   0 -14  -6 69.5951 40.8484   2
   0  14   6 184.902 54.2153   5
   0 -14   6 257.229 52.3382   2
   0  14  -6 244.905 73.5729   1
   0  14  -7 1871.92 154.609   1
   0  14   7 1847.78 138.066   5
   0 -14  -7 1856.63 129.984   2
   0 -14  -7 1663.74 152.059   7
   0 -14   7 1732.17 116.456   2
   0  14   8 724.583 97.8326   5
   0  14  -8 832.137 104.671   1
   0 -14  -8 950.144 99.5640   2
   0 -14   8 881.057 88.9665   2
   0  14  -8 770.489 96.1862   6
   0 -14  -8 843.619 115.358   7
   0 -14  -9 2433.56 186.107   7
   0  14  -9 2087.09 145.483   6
   0 -14  -9 2307.20 152.500   2
   0  14  -9 2226.78 168.192   1
   0  14   9 2283.00 158.755   5
   0  14  10 8048.86 304.211   5
   0 -14 -10 7783.25 335.104   7
   0  14 -10 7465.94 310.007   1
   0 -14 -10 8131.10 295.534   2
   0  14 -10 7860.98 284.095   6
   0  14  11 1744.83 151.869   5
   0 -14 -11 1687.95 138.661   2
   0  14 -11 2001.13 164.300   1
   0 -14 -11 1917.16 172.275   7
   0  14 -12 7620.39 320.020   1
   0 -14 -12 7809.23 343.051   7
   0 -14 -12 8022.75 312.538   2
   0  14  13 1455.86 144.650   5
   0 -14 -13 1322.57 152.734   7
   0  14 -13 1200.72 134.580   1
   0 -14 -14 7061.48 337.684   7
   0 -14 -14 6776.43 334.054   3
   0  14  14 7657.48 339.871   5
   0  14 -14 6872.49 309.105   1
   0  14 -15 1451.65 151.161   1
   0 -14 -15 1118.11 144.806   3
   0  14  15 1294.98 154.270   5
   0  14 -16 243.967 90.0193   1
   0  14  16 328.917 114.060   5
   0 -14 -16 222.905 93.1385   3
   0 -14 -16 194.359 91.2886   7
   0 -14 -17 158.243 89.6684   3
   0  14  17 7.62505 86.6455   5
   0  15   0 44.2148 40.1400   5
   0  15   0-34.7207 66.6597   1
   0 -15   0 17.8427 60.4315   7
   0 -15   1-47.8704 65.4033   7
   0 -15  -1-30.5654 68.7388   7
   0  15   1 66.8877 83.6245   1
   0  15   1 50.4884 47.7883   5
   0  15  -1-35.7032 70.2362   1
   0 -15   2 5263.39 261.580   7
   0  15   2 5507.78 271.379   1
   0  15  -2 5840.51 276.173   1
   0 -15  -2 5360.12 265.152   7
   0  15   3 820.408 117.918   1
   0  15  -3 977.167 126.329   1
   0 -15  -3 994.583 125.488   7
   0  15   3 960.273 94.7284   5
   0  15   4 8742.81 348.561   1
   0 -15  -4 8461.77 340.853   7
   0  15  -4 8207.14 329.412   1
   0  15   4 8369.63 270.605   5
   0  15   5 6870.32 248.281   5
   0 -15  -5 6947.54 309.910   7
   0  15  -5 6456.59 296.489   1
   0  15   5 6924.65 310.687   1
   0 -15  -6 14068.0 452.550   7
   0  15  -6 13876.0 442.527   1
   0  15   6 14102.7 377.403   5
   0 -15  -7 4885.00 265.963   7
   0  15   7 5877.63 241.085   5
   0  15  -7 5488.59 274.190   1
   0  15  -8 9972.24 326.590   6
   0 -15  -8 10027.9 382.994   7
   0  15  -8 9755.46 367.190   1
   0  15   8 10137.3 330.463   5
   0 -15  -9 586.476 112.626   7
   0  15  -9 657.064 105.753   1
   0  15   9 741.115 101.758   5
   0 -15 -10 1341.16 156.849   7
   0  15  10 1048.23 119.924   5
   0  15 -10 1000.34 130.837   1
   0  15 -11 77.7148 74.0860   1
   0  15  11 114.200 72.7440   5
   0 -15 -11-34.5252 80.4209   7
   0 -15 -12 1460.29 156.788   7
   0  15 -12 1246.64 141.410   1
   0 -15 -13 568.323 109.139   7
   0  15 -13 995.693 134.604   1
   0 -15 -14 4022.95 256.416   3
   0  15 -14 4148.22 252.183   1
   0 -15 -14 4173.95 270.395   7
   0  15 -15 3175.36 220.281   1
   0 -15 -15 3258.14 233.448   3
   0 -15 -16 7253.75 354.908   3
   0  16   0 154.589 73.8290   1
   0 -16   0-9.59379 72.0669   7
   0 -16   1 23245.3 608.764   7
   0  16  -1 23734.4 618.949   1
   0 -16  -1 23387.4 613.449   7
   0  16   1 23750.7 621.645   1
   0 -16  -2 105.029 69.7869   7
   0  16  -2 121.382 76.1958   1
   0  16   2 114.511 84.2085   1
   0 -16   2-3.31927 71.9358   7
   0  16  -3 11874.0 419.018   1
   0  16   3 11471.9 422.425   1
   0 -16  -3 12173.2 426.828   7
   0 -16  -4 70.8347 76.0186   7
   0  16   4 287.098 94.8253   1
   0  16  -4 337.381 90.3227   1
   0  16  -5 2171.87 183.621   1
   0 -16  -5 2350.75 191.701   7
   0  16  -6 432.639 99.2948   1
   0 -16  -6 286.386 86.6831   7
   0 -16  -7 848.733 128.773   7
   0  16  -7 791.755 125.137   1
   0 -16  -8 48.8916 67.9695   7
   0  16  -8 108.369 76.9075   1
   0 -16  -9 7160.18 338.627   7
   0  16  -9 6554.73 314.028   1
   0  16 -10 198.285 87.2105   1
   0 -16 -10 63.4299 75.4198   7
   0 -16 -11 9928.51 414.573   7
   0  16 -11 9514.86 388.324   1
   0 -16 -12 42.0419 73.6300   7
   0  16 -12 215.582 94.1296   1
   0  16 -13 6488.47 320.892   1
   0  16 -14 587.361 111.460   1
   0 -17   0-58.6846 70.6055   7
   0  17   0 69.4701 75.9582   1
   0 -17   1 1758.90 174.439   7
   0  17  -1 1793.29 179.461   1
   0 -17  -1 1996.58 180.699   7
   0  17   1 1587.38 164.024   1
   0 -17  -2 367.694 101.401   7
   0  17   2 669.189 115.342   1
   0  17  -2 443.368 104.919   1
   0  17   3 4656.74 277.260   1
   0 -17  -3 4701.21 271.448   7
   0  17  -3 4156.65 259.459   1
   0 -17  -4 6339.13 319.527   7
   0  17   4 5559.93 303.108   1
   0  17  -4 6147.18 313.672   1
   0  17  -5 5130.31 285.201   1
   0 -17  -5 5178.44 290.762   7
   0  17  -6 7082.85 337.734   1
   0 -17  -6 7183.93 342.693   7
   0  17  -7 5260.77 294.049   1
   0 -17  -7 5434.61 301.435   7
   0  17  -8 4050.46 258.593   1
   0 -17  -8 4706.56 282.900   7
   0  17  -9 2642.75 210.968   1
   0 -17  -9 2912.42 228.813   7
   0  17 -10 702.743 124.697   1
   0  17 -11 139.337 75.7517   1
   0 -18   0 24262.5 675.017   7
   0  18   0 23912.5 680.307   1
   0  18   1 252.459 91.1674   1
   0 -18  -1-43.7199 85.1579   7
   0  18  -1 193.718 86.6480   1
   0 -18  -2 12586.7 471.648   7
   0  18   2 12842.5 484.292   1
   0  18  -2 12721.3 478.800   1
   0  18  -3 336.492 105.875   1
   0 -18  -3 637.892 118.380   7
   0  18   3 661.806 121.394   1
   0  18  -4 5743.47 314.462   1
   0 -18  -4 5520.64 308.719   7
   0 -18  -5 545.239 109.646   7
   0  18  -5 411.968 100.328   1
   1   0 -24 385.777 111.129   3
   1   0 -23-4.12714 70.7756   3
   1   0 -22 729.185 133.435   3
   1   0 -21 60.4998 80.5362   3
   1   0 -20 11981.4 425.947   3
   1   0 -19 156.185 76.5076   3
   1   0 -18 8595.19 331.405   3
   1   0 -17-16.6540 55.0248   3
   1   0 -16 3742.09 203.642   3
   1   0 -15-12.8820 52.1676   3
   1   0 -14 3358.04 176.754   3
   1   0 -13-84.1104 48.3551   3
   1   0 -12 5332.84 204.022   3
   1   0 -11-39.2506 40.6063   3
   1   0 -10 74835.7 1055.96   3
   1   0  -9 55.4433 41.9823   3
  -1   0   8 80653.8 1052.20   3
  -1   0   8 78191.9 1059.90   2
  -1   0   8 76188.9 1055.33   6
   1   0  -8 76325.0 1043.49   3
  -1   0   7 48.1366 34.2704   3
   1   0  -7 19.9691 38.6454   3
  -1   0   7 57.9311 35.9157   2
   1   0  -6 123194. 1499.45   3
  -1   0   6 120901. 1496.52   3
  -1   0   5 11.2380 27.0339   3
   1   0  -5 46.3472 28.7367   3
   1   0  -4 100197. 1181.86   3
  -1   0   4 95162.5 1187.15   6
  -1   0   4 97639.0 1180.12   3
  -1   0   3-12.4617 21.0271   3
  -1   0   3 7.73156 22.6689   6
   1   0  -3 22.4454 22.1198   3
  -1   0   2 112.327 20.3545   6
   1   0  -2 153.987 22.2396   3
  -1   0   2 111.968 21.1126   3
   1   0  -2 119.826 20.9311   6
  -1   0   1 101.238 13.8716   5
  -1   0   1 130.995 14.4357   3
   1   0  -1 112.502 14.9479   6
   1   0  -1 100.636 13.6413   5
  -1   0   1 116.160 14.6220   6
   1   0  -1 113.695 14.0372   3
   1   0   1 6.02637 14.4320   2
  -1   0  -1 30.3829 16.1777   2
  -1   0  -2 71948.9 891.309   2
   1   0   2 76707.2 894.196   2
  -1   0  -3 14.5891 30.3122   2
   1   0   3-18.0438 27.9468   2
   1   0   4 205332. 2371.13   2
  -1   0  -4 199023. 2372.68   2
   1   0   5-12.4209 29.9022   2
  -1   0  -5-23.5347 31.9763   2
  -1   0  -6 151073. 1868.57   2
   1   0   6 156298. 1872.21   2
  -1   0  -6 151662. 1852.97   3
   1   0   7 34.6088 33.2536   2
  -1   0  -7-33.7022 39.4807   3
  -1   0  -7 48.2412 43.6152   2
  -1   0  -8 142408. 1781.46   3
   1   0   8 142206. 1799.89   2
  -1   0  -9-6.58823 39.1615   3
  -1   0 -10 16944.2 368.269   3
  -1   0 -11-43.3313 45.2389   3
  -1   0 -12 84.0338 45.0173   3
  -1   0 -13 59.2763 49.4491   3
  -1   0 -14 12214.2 352.022   3
  -1   0 -15 23.5314 50.1142   3
  -1   0 -16 4567.97 226.356   3
  -1   0 -17-25.8245 56.8692   3
  -1   0 -18 4099.04 230.716   3
  -1   0 -19-3.54486 69.0487   3
  -1   0 -20 370.109 89.1204   3
  -1   0 -21-39.8740 73.4636   3
  -1   0 -22 1121.42 157.317   3
  -1   0 -23-22.4475 70.3252   3
   1   1 -24 6632.73 356.416   3
   1  -1 -24 7226.00 368.843   3
   1   1 -23 8648.23 396.591   3
   1  -1 -23 9067.83 404.567   3
   1  -1 -22 4850.24 287.550   3
   1   1 -22 4998.38 294.151   3
   1  -1 -21 6462.50 316.606   3
   1   1 -21 6798.54 327.801   3
   1   1 -20 1854.75 170.559   3
   1  -1 -20 1539.22 152.433   3
   1   1 -19 481.381 98.2015   3
   1  -1 -19 750.261 117.857   3
   1   1 -18 33.6375 57.1422   3
   1  -1 -18 62.2941 59.7850   3
   1  -1 -17 4964.21 243.677   3
   1   1 -17 4897.61 242.986   3
   1   1 -16 8400.01 305.775   3
   1  -1 -16 8191.51 301.583   3
   1  -1 -15 7511.40 279.050   3
   1   1 -15 7356.80 275.239   3
   1   1 -14 22038.2 495.071   3
   1  -1 -14 21669.9 491.885   3
   1  -1 -13 21486.6 472.916   3
   1   1 -13 21810.9 476.469   3
   1   1 -12 30554.9 570.178   3
   1  -1 -12 29848.3 566.190   3
   1  -1 -11 44426.6 730.096   3
   1   1 -11 46061.0 736.333   3
   1  -1 -10 29527.0 525.703   3
   1   1 -10 29889.5 526.079   3
   1  -1  -9 7034.86 206.053   3
  -1  -1   9 7040.12 209.444   6
   1   1  -9 7025.57 204.130   3
  -1  -1   8 8973.75 225.103   3
   1   1  -8 9485.12 230.586   3
  -1   1   8 9563.15 237.716   2
   1  -1  -8 9353.57 230.432   3
  -1  -1   8 9311.04 232.933   6
  -1   1   7 173.928 41.0814   2
   1   1  -7 115.604 41.0068   3
   1  -1  -7 70.8929 38.3118   3
  -1  -1   7 166.364 39.5179   6
  -1  -1   7 141.464 36.0436   3
  -1  -1   6 144.018 33.1076   6
   1  -1  -6 121.412 36.4783   3
  -1  -1   6 125.127 32.1107   3
   1   1  -6 127.053 37.7685   3
  -1   1   6 67.3327 28.7207   2
   1   1  -5 6626.63 154.343   3
  -1  -1   5 6932.51 155.766   3
  -1   1   5 6589.19 156.537   2
  -1  -1   5 6498.34 156.515   6
   1  -1  -5 6423.31 152.608   3
  -1  -1   4 464.984 40.1533   6
  -1   1   4 517.739 40.9875   2
   1   1  -4 475.194 41.0627   6
   1  -1  -4 499.161 42.5931   3
   1   1  -4 508.817 43.4705   3
  -1  -1   4 463.712 39.9431   3
   1  -1  -4 508.785 28.0492   1
  -1  -1   3 9647.57 169.662   3
   1  -1  -3 9501.78 138.384   1
  -1   1   3 9109.97 163.423   3
   1   1  -3 9534.51 169.805   6
  -1  -1   3 9640.09 170.076   6
   1   1  -3 9890.11 169.642   3
   1  -1  -3 9413.43 163.378   3
  -1   1   3 9632.08 139.009   1
  -1  -1   2 20599.2 296.852   5
   1  -1  -2 22467.4 290.062   3
  -1   1   2 21253.7 290.521   3
   1   1  -2 22695.2 299.458   5
  -1   1   2 22209.9 275.902   1
   1   1  -2 22222.0 271.082   1
   1   1  -2 22762.0 302.253   3
  -1  -1   2 22788.3 301.560   3
  -1  -1   1 75008.7 895.639   4
   1   1  -1 72538.2 896.692   3
  -1  -1   1 77543.1 897.441   5
  -1  -1   1 79539.6 882.682   7
  -1  -1   1 75998.7 898.768   3
  -1  -1   0 34376.8 405.249   4
   1   1   0 33406.6 415.478   2
  -1  -1   0 33438.4 415.841   2
  -1  -1   0 33602.1 418.074   5
  -1   1   0 32708.0 406.311   7
   1   1   0 34044.0 416.839   5
   1   1   0 34090.8 405.162   4
   1   1   1 47096.9 587.409   2
   1  -1   1 48429.6 570.415   2
   1   1   1 46587.9 588.780   5
   1  -1   1 49735.6 569.900   4
  -1  -1  -1 45689.0 587.318   2
  -1   1  -1 49421.6 571.203   2
   1   1   2 314.273 32.3479   2
  -1   1  -2 496.927 29.6918   3
  -1  -1  -2 428.552 33.8562   2
  -1   1  -2 422.501 33.3359   2
   1  -1   2 408.188 26.6079   4
   1  -1   2 469.075 31.2125   2
  -1  -1  -3 232.133 35.3802   2
  -1   1  -3 174.472 32.6355   2
   1   1   3 213.967 35.1053   2
  -1   1  -3 212.599 28.8561   3
  -1  -1  -4 21936.7 342.649   2
  -1   1  -4 21367.2 320.883   3
   1   1   4 21128.3 338.487   2
   1  -1   4 20491.3 330.298   2
  -1   1  -5 43956.2 610.768   3
  -1  -1  -5 45806.4 636.051   2
   1   1   5 45260.8 634.686   2
   1  -1   5 45097.7 627.401   2
   1  -1   6 27305.6 442.491   2
  -1   1  -6 27033.4 426.574   3
   1   1   6 27558.2 449.594   2
  -1  -1  -6 27390.9 449.101   2
   1   1   7 23978.8 423.677   2
  -1  -1  -7 23314.9 423.185   2
  -1   1  -7 23692.0 403.302   3
   1  -1   7 23712.4 416.102   2
   1   1   8 20187.2 389.706   2
   1  -1   8 18740.2 376.073   2
  -1  -1  -8 18836.7 374.506   3
  -1   1  -8 19197.9 365.785   3
  -1  -1  -8 19310.3 384.223   2
  -1  -1  -9 50080.8 758.875   3
  -1  -1  -9 49076.1 769.961   2
  -1   1  -9 49148.6 744.861   3
  -1   1 -10 38000.4 635.211   3
  -1  -1 -10 38952.6 646.920   3
  -1   1 -11 51002.9 808.262   3
  -1  -1 -11 51139.7 815.227   3
  -1  -1 -12 17152.6 402.428   3
  -1   1 -12 16992.3 396.848   3
  -1   1 -13 20094.5 462.001   3
  -1  -1 -13 21301.4 475.271   3
  -1  -1 -14 3501.73 185.107   3
  -1   1 -14 3385.44 178.265   3
  -1   1 -15 3544.92 191.340   3
  -1  -1 -15 3864.70 199.496   3
  -1   1 -16-7.05387 58.9886   3
  -1  -1 -16 52.4107 53.5722   3
  -1   1 -17 201.581 66.7582   3
  -1  -1 -17 303.178 82.2343   3
  -1  -1 -18 6142.20 284.315   3
  -1   1 -18 6750.09 295.032   3
  -1  -1 -19 5926.51 286.561   3
  -1   1 -19 5421.40 277.688   3
  -1   1 -20 7309.24 331.347   3
  -1  -1 -20 7796.18 342.602   3
  -1  -1 -21 4021.27 257.445   3
  -1   1 -21 4070.72 257.052   3
  -1  -1 -22 6691.95 345.806   3
  -1   1 -22 6596.77 341.589   3
  -1  -1 -23 5721.64 324.748   3
  -1   1 -23 6477.76 343.432   3
  -1  -2  25 2305.22 211.451   4
   1   2 -24 185.724 92.8961   3
   1  -2 -24 210.041 92.1788   3
   1   2 -23 297.552 103.314   3
   1  -2 -23 216.745 86.5020   3
   1  -2 -22 174.751 88.6111   3
   1   2 -22 208.451 91.6949   3
   1   2 -21 7931.28 358.983   3
   1  -2 -21 7951.16 358.429   3
   1  -2 -20 2329.75 187.605   3
   1   2 -20 2461.88 193.943   3
   1   2 -19 15644.2 473.037   3
   1  -2 -19 14471.0 456.663   3
   1  -2 -18 771.843 115.759   3
   1   2 -18 681.607 102.656   3
   1  -2 -17 15041.7 438.513   3
   1   2 -17 15297.0 440.437   3
   1   2 -16 4506.17 220.033   3
   1  -2 -16 4061.56 213.831   3
   1   2 -15 4043.10 203.595   3
   1  -2 -15 4132.21 207.446   3
   1   2 -14 2002.55 140.100   3
   1  -2 -14 2107.87 146.403   3
   1   2 -13 1238.55 109.065   3
   1  -2 -13 1412.25 118.789   3
   1  -2 -12 370.857 69.3393   3
   1   2 -12 389.279 67.8742   3
   1   2 -11 16514.4 372.358   3
   1  -2 -11 16350.6 372.787   3
   1   2 -10 119.897 40.2242   3
   1  -2 -10 275.197 59.4534   3
   1   2  -9 49591.8 745.820   3
   1  -2  -9 49725.6 748.144   3
  -1  -2   9 49696.2 753.327   6
   1   2  -8 13101.2 285.283   3
  -1   2   8 12648.8 288.687   2
  -1  -2   8 14183.1 295.790   6
   1  -2  -8 13452.2 289.641   3
  -1  -2   8 13747.5 287.354   3
   1  -2  -7 137587. 1624.53   1
  -1   2   7 136693. 1699.01   2
  -1  -2   7 133547. 1690.06   6
   1   2  -7 135385. 1687.31   3
   1  -2  -7 138007. 1693.59   3
  -1  -2   7 138251. 1690.25   3
   1   2  -6 406.656 47.1211   6
   1  -2  -6 440.366 37.9758   1
  -1   2   6 454.584 50.6813   2
   1  -2  -6 520.769 54.6861   3
   1   2  -6 371.348 46.4324   3
  -1  -2   6 386.519 45.2566   3
  -1  -2   6 420.819 47.3891   6
  -1   2   5 17047.9 293.402   2
  -1  -2   5 17188.4 294.418   3
   1   2  -5 17408.5 293.757   6
   1  -2  -5 17194.2 259.952   1
   1   2  -5 17707.4 296.212   3
  -1  -2   5 17444.5 296.098   6
   1  -2  -5 17293.4 293.534   3
  -1  -2   4 10416.8 197.580   3
   1  -2  -4 10623.3 194.919   2
  -1   2   4 10411.3 196.100   2
   1   2  -4 10470.4 196.993   3
  -1  -2   4 10299.9 196.358   5
   1   2  -4 10183.9 196.173   6
  -1   2   4 10427.3 174.810   1
   1  -2  -4 10498.5 173.139   1
   1  -2  -3 38725.0 486.203   1
   1   2  -3 38334.9 495.826   7
  -1  -2   3 37255.8 505.873   5
   1  -2  -3 39067.4 494.005   2
  -1   2   3 39363.5 496.725   2
  -1  -2   3 38752.1 508.862   3
  -1   2   3 38220.5 485.535   1
   1   2  -3 38329.8 509.370   3
  -1  -2   3 35849.3 511.928   4
   1   2  -2 7793.17 148.214   4
   1   2  -2 7553.99 129.130   1
   1   2  -2 7766.13 135.646   7
  -1  -2   2 7562.40 146.640   4
  -1  -2   2 7348.19 141.180   3
   1   2  -2 8022.58 142.457   5
   1  -2  -2 7883.48 124.137   2
  -1  -2   2 7774.44 135.005   7
  -1  -2   2 7269.76 139.859   5
  -1   2   2 7545.13 124.085   2
  -1   2   2 7597.09 132.768   1
   1   2  -2 7881.86 144.092   3
   1   2  -1 5722.33 108.491   7
  -1   2   1 5703.12 106.806   7
  -1  -2   1 5988.17 109.242   7
  -1  -2   1 5731.21 109.554   1
   1   2  -1 5947.89 109.332   1
  -1  -2   1 5752.68 112.967   5
   1  -2  -1 5717.70 107.125   7
  -1  -2   1 5804.85 113.974   3
   1   2  -1 5916.75 116.614   3
   1   2  -1 6101.37 113.030   5
  -1  -2   1 5929.12 116.152   4
   1   2  -1 5854.58 115.975   4
   1   2   0 15511.2 229.868   1
  -1  -2   0 15542.0 230.891   5
  -1  -2   0 16061.7 229.725   2
  -1   2   0 15390.2 225.558   7
   1   2   0 15647.6 227.854   2
   1   2   0 16209.2 229.433   4
  -1  -2   0 15646.3 231.009   1
   1   2   0 15776.0 231.044   5
   1  -2   0 15782.5 225.991   7
  -1   2  -1 28566.6 383.034   4
   1   2   1 28758.9 387.458   2
   1   2   1 29355.6 390.717   5
  -1  -2  -1 29573.3 393.412   1
  -1   2  -1 29916.6 389.900   7
  -1  -2  -1 29104.3 391.884   5
  -1  -2  -1 28931.5 387.452   2
  -1   2  -2 999.470 37.3299   3
   1  -2   2 988.329 45.6663   4
  -1   2  -2 1003.58 34.8894   6
   1   2   2 932.193 50.0434   2
  -1  -2  -2 975.179 51.7413   2
   1  -2   2 1032.05 36.8031   3
  -1   2  -2 1039.93 45.9338   4
   1   2   3 95473.6 1191.54   2
   1  -2   3 96126.6 1149.57   6
   1  -2   3 95111.2 1175.69   2
   1  -2   3 98084.2 1171.48   4
  -1  -2  -3 98792.8 1193.84   2
  -1   2  -3 97724.7 1148.29   6
  -1   2  -3 98534.1 1172.47   4
  -1   2  -3 103641. 1162.99   3
   1  -2   3 96553.4 1157.71   3
   1   2   4 1726.87 79.2138   2
   1  -2   4 1698.48 63.3234   6
   1  -2   4 1711.17 68.3301   4
   1  -2   4 1617.10 71.0220   2
   1  -2   4 1576.88 64.4927   3
  -1   2  -4 1677.09 65.2330   3
  -1  -2  -4 1705.33 79.3177   2
   1   2   5 73975.1 976.919   2
   1  -2   5 75091.6 946.468   4
  -1   2  -5 73707.4 945.913   3
   1  -2   5 73912.2 938.319   6
  -1  -2  -5 72935.4 976.950   2
   1  -2   5 75458.0 947.681   3
   1  -2   5 78576.7 971.073   2
   1  -2   6 97.2876 36.9791   2
  -1   2  -6 98.2114 36.8841   3
   1   2   6 45.7209 33.7954   2
   1  -2   6 44.0735 24.4191   6
  -1  -2  -6 18.2489 36.3227   2
  -1  -2  -7 85836.1 1149.77   2
   1  -2   7 89927.3 1146.66   2
   1  -2   7 85961.4 1115.11   6
  -1   2  -7 84039.7 1120.13   3
   1   2   7 85080.1 1148.89   2
   1  -2   8 1122.43 81.1405   6
   1  -2   8 1319.81 89.2488   2
  -1  -2  -8 1104.35 88.3587   2
  -1   2  -8 1210.87 83.1678   3
  -1  -2  -9 6051.42 204.754   2
  -1   2  -9 6327.33 194.833   3
   1  -2   9 6079.18 189.277   6
  -1  -2 -10 5733.81 202.406   3
  -1  -2 -10 5905.32 213.014   2
  -1   2 -10 5652.63 196.684   3
  -1   2 -11 393.016 64.6636   3
  -1  -2 -11 560.838 74.9670   3
  -1  -2 -12 3676.50 176.419   3
  -1   2 -12 3723.50 170.389   3
  -1  -2 -13 19756.7 457.793   3
  -1   2 -13 19213.1 445.522   3
  -1   2 -14 2497.86 154.967   3
  -1  -2 -14 2546.10 159.316   3
  -1  -2 -15 20903.5 507.381   3
  -1   2 -15 21164.6 503.505   3
  -1  -2 -16 8868.42 322.230   3
  -1   2 -16 9553.28 330.729   3
  -1   2 -17 10179.7 354.659   3
  -1  -2 -17 9593.11 348.554   3
  -1   2 -18 1289.82 139.740   3
  -1  -2 -18 1400.41 140.676   3
  -1  -2 -19 2840.30 205.552   3
  -1   2 -19 2719.08 200.051   3
  -1  -2 -20 125.420 78.8667   3
  -1   2 -20 174.457 77.1377   3
  -1  -2 -21 17.4321 69.8719   3
  -1   2 -21-26.2434 85.7231   3
  -1  -2 -22 294.406 96.0351   3
  -1   2 -22 169.557 74.5250   3
   1  -2  22 198.435 80.5631   4
   1  -2  23 1567.68 160.923   4
  -1  -2 -23 1606.46 175.721   3
  -1   2 -23 1581.19 182.804   3
  -1  -3  25 2707.32 221.963   4
   1   3 -24 8270.52 394.830   3
  -1  -3  24 7731.87 370.715   4
   1  -3 -23 290.232 99.3577   3
   1   3 -23 433.745 123.061   3
  -1  -3  23 377.419 97.0276   4
  -1  -3  22 9789.22 395.765   4
   1  -3 -22 9877.48 412.931   3
   1   3 -22 9996.70 415.390   3
   1   3 -21 2617.45 206.537   3
   1  -3 -21 2361.98 196.600   3
   1   3 -20 2693.82 199.600   3
   1  -3 -20 2269.84 188.480   3
   1   3 -19 77.7717 65.7537   3
   1  -3 -19 262.077 86.5484   3
   1  -3 -18 85.3346 66.1048   3
   1   3 -18 38.2853 60.3256   3
   1  -3 -17 3294.53 199.530   3
   1   3 -17 3377.77 201.000   3
   1  -3 -16 7171.84 282.054   3
   1   3 -16 7358.09 286.431   3
   1  -3 -15 17487.9 450.781   3
   1   3 -15 18113.8 456.043   3
   1  -3 -14 11340.0 338.124   3
   1   3 -14 11071.5 331.723   3
   1  -3 -13 11627.1 329.795   3
   1   3 -13 11575.4 326.582   3
   1  -3 -13 10924.9 256.325   1
   1  -3 -12 20639.1 447.873   3
   1   3 -12 20761.6 447.750   3
   1  -3 -12 20313.5 371.321   1
   1  -3 -11 19227.7 413.872   3
   1   3 -11 19155.3 411.699   3
   1  -3 -11 19364.1 349.077   1
   1  -3 -10 26802.8 431.739   1
   1  -3 -10 26686.0 496.344   3
   1   3 -10 27058.2 495.652   3
   1  -3  -9 5978.10 192.804   3
   1  -3  -9 5806.51 154.184   1
   1   3  -9 6022.06 191.494   3
  -1   3   8 1102.95 81.0947   2
   1   3  -8 1068.46 78.0751   3
   1  -3  -8 1173.98 66.2837   1
   1  -3  -8 984.256 81.4525   3
  -1  -3   8 1071.09 75.4023   3
   1   3  -8 1141.67 78.5744   6
  -1  -3   7 2232.29 99.3415   3
   1  -3  -7 1901.86 107.996   3
   1   3  -7 2227.64 102.227   3
  -1   3   7 2054.45 100.559   2
   1   3  -7 2097.54 96.9370   6
   1  -3  -7 2212.38 85.4479   1
   1  -3  -7 2203.42 102.358   2
   1   3  -6 14111.0 265.677   6
   1  -3  -6 13162.7 261.901   2
  -1  -3   6 13692.1 276.836   4
   1   3  -6 12796.6 259.770   3
  -1  -3   6 14036.1 267.876   3
  -1   3   6 12677.8 263.726   2
   1  -3  -6 12977.2 236.264   1
  -1  -3   6 13451.7 264.703   5
  -1  -3   5 1379.96 70.2262   3
   1   3  -5 1285.35 70.0664   3
   1  -3  -5 1226.91 66.0002   2
   1  -3  -5 1344.29 61.3929   1
  -1  -3   5 1445.07 78.3005   4
  -1  -3   5 1233.62 67.0524   5
  -1   3   5 1258.54 69.1995   2
   1   3  -5 1382.56 71.1626   6
   1   3  -4 14352.8 253.737   3
  -1  -3   4 15067.8 256.997   3
   1  -3  -4 14387.0 243.557   2
  -1  -3   4 14778.1 265.919   4
   1   3  -4 14057.4 248.716   7
  -1   3   4 14064.6 243.764   2
   1  -3  -4 14385.7 238.600   1
  -1   3   4 14486.5 240.724   1
  -1  -3   4 14153.2 251.461   5
   1  -3  -3 22158.8 331.909   1
  -1  -3   3 23177.7 355.659   4
   1   3  -3 22771.5 356.256   4
   1   3  -3 22887.2 339.627   7
  -1   3   3 22685.3 323.292   2
   1  -3  -3 23150.2 322.584   2
   1   3  -3 23201.3 341.778   5
  -1  -3   3 23041.3 342.203   3
  -1   3   3 23407.1 335.501   1
   1   3  -3 22749.4 341.886   3
  -1  -3   3 21775.5 338.724   5
   1   3  -2 44577.0 567.263   1
   1   3  -2 44272.9 571.231   7
   1  -3  -2 44115.9 539.068   2
  -1   3   2 44331.4 571.138   1
  -1  -3   2 42419.5 568.691   7
   1   3  -2 43702.8 585.022   4
  -1  -3   2 43333.1 584.334   4
  -1  -3   2 42640.6 571.623   3
  -1  -3   2 43872.8 569.232   5
   1   3  -2 43570.3 574.088   3
  -1   3   2 44484.4 539.013   2
   1   3  -2 43871.9 568.865   5
   1  -3  -2 43624.5 569.129   7
  -1  -3   1 11739.3 198.503   5
  -1   3   1 11736.1 161.372   2
   1  -3  -1 11913.2 199.954   7
   1  -3  -1 11960.8 162.728   2
   1   3  -1 11756.3 200.689   7
   1   3  -1 11992.1 208.312   4
  -1  -3   1 11923.2 201.027   7
   1   3  -1 11678.9 198.411   5
   1   3  -1 11810.9 201.706   1
  -1  -3   1 12001.8 201.963   3
  -1  -3   1 12066.6 209.036   4
  -1   3   1 11730.7 199.127   7
   1   3  -1 12148.6 203.734   3
  -1   3   1 11943.6 168.643   5
  -1  -3   1 11262.3 199.482   1
   1  -3   0 94644.5 1106.63   2
  -1  -3   0 95807.5 1160.16   5
   1   3   0 96555.5 1165.27   4
   1  -3   0 99647.6 1118.23   3
  -1   3   0 93803.5 1159.82   7
  -1   3   0 98536.5 1111.60   5
   1  -3   0 96013.2 1111.87   5
  -1  -3   0 92948.8 1162.50   3
  -1  -3   0 97911.5 1167.98   1
   1  -3   0 99678.2 1162.72   7
  -1  -3   0 96075.6 1163.21   7
   1   3   0 97425.7 1167.32   1
   1   3   0 99143.8 1159.10   5
  -1  -3  -1 7594.16 151.670   5
   1   3   1 7356.50 144.660   2
  -1  -3  -1 7210.87 152.353   1
  -1  -3  -1 7325.36 146.594   2
  -1   3  -1 7556.32 153.196   4
   1  -3   1 7522.58 150.142   7
   1   3   1 7487.01 148.519   5
   1   3   1 7373.16 154.899   1
  -1   3  -1 7320.63 117.520   3
   1  -3   1 7629.22 116.997   3
  -1   3  -1 7474.93 150.733   7
   1  -3   1 7429.19 116.654   5
  -1   3  -2 7780.83 158.790   4
   1  -3   2 7918.28 132.084   3
  -1  -3  -2 7062.09 160.203   1
   1   3   2 7767.26 160.625   2
  -1   3  -2 8084.71 133.074   3
  -1  -3  -2 7511.11 159.188   2
   1   3   2 7986.50 165.448   5
   1  -3   2 8116.49 165.810   4
   1  -3   2 8002.31 134.675   5
  -1   3  -2 7866.36 162.461   7
  -1   3  -3 8783.71 153.015   3
  -1  -3  -3 8065.83 175.885   2
   1  -3   3 8396.15 171.177   4
  -1   3  -3 8610.55 173.182   4
  -1  -3  -3 8033.99 176.008   1
   1   3   3 8304.07 177.239   2
   1  -3   3 8378.01 150.806   3
  -1   3  -3 8393.47 147.107   6
   1  -3   4 955.203 50.9897   3
  -1  -3  -4 937.647 59.8774   1
  -1   3  -4 984.851 58.3987   4
  -1  -3  -4 963.597 64.2727   2
   1   3   4 892.890 60.0533   2
   1  -3   4 975.117 58.6086   4
  -1   3  -4 926.398 51.1261   3
  -1   3  -4 1001.75 48.6562   6
   1  -3   5 24121.5 380.355   4
  -1   3  -5 23567.2 369.849   3
   1  -3   5 24646.4 368.406   3
   1   3   5 23977.9 401.010   2
  -1  -3  -5 23521.3 400.262   2
  -1   3  -5 23949.9 358.443   6
   1  -3   6 6268.55 171.735   2
  -1  -3  -6 6336.04 180.953   2
  -1   3  -6 5904.94 160.390   3
   1  -3   6 6277.46 165.175   4
   1  -3   6 6149.65 154.667   6
   1  -3   6 6283.61 158.412   3
   1   3   6 6308.56 178.723   2
   1  -3   7 35017.9 527.711   3
  -1  -3  -7 33772.2 561.573   2
   1  -3   7 34140.3 549.930   2
   1  -3   7 34593.3 532.398   4
   1   3   7 34496.1 560.785   2
   1  -3   7 34997.6 525.768   6
  -1   3  -7 34414.7 531.982   3
  -1  -3  -8 63299.6 913.538   2
   1  -3   8 61913.2 869.879   3
   1  -3   8 65212.8 878.870   6
  -1   3  -8 63505.2 879.376   3
   1  -3   8 61521.1 873.375   4
   1  -3   8 62082.2 899.800   2
   1  -3   9 31229.2 526.402   4
  -1  -3  -9 31936.0 567.460   2
   1  -3   9 31977.0 535.250   6
  -1   3  -9 31807.8 534.711   3
  -1   3 -10 38162.4 631.056   3
  -1  -3 -10 37580.5 656.425   2
  -1  -3 -11 17487.9 398.666   3
  -1  -3 -11 16515.6 399.639   2
  -1   3 -11 16152.5 375.068   3
  -1  -3 -12 15632.8 391.060   3
  -1   3 -12 16501.8 389.048   3
  -1   3 -13 2728.01 156.171   3
  -1  -3 -13 2885.98 162.930   3
  -1  -3 -14 6409.78 253.771   3
  -1   3 -14 6501.15 250.524   3
  -1   3 -15-27.9564 57.0277   3
  -1  -3 -15 24.5331 54.6263   3
  -1   3 -16 609.188 94.5160   3
  -1  -3 -16 385.616 83.8859   3
  -1  -3 -17 2999.33 196.618   3
   1  -3  17 2654.53 167.102   4
  -1   3 -17 2544.48 178.592   3
  -1   3 -18 4826.99 251.724   3
   1  -3  18 4870.24 233.930   4
  -1  -3 -18 5189.57 264.386   3
  -1  -3 -19 3740.56 232.484   3
   1  -3  19 3849.91 214.267   4
  -1   3 -19 3705.78 229.161   3
   1  -3  20 12119.0 401.583   4
  -1   3 -20 11675.9 427.385   3
  -1  -3 -20 11639.1 429.630   3
  -1   3 -21 6182.38 313.651   3
   1  -3  21 5839.81 281.719   4
  -1  -3 -21 6289.41 324.116   3
   1  -3  22 11769.9 418.724   4
  -1  -3 -22 11485.8 455.199   3
  -1   3 -22 11778.4 455.141   3
   1  -3  23 1468.19 161.754   4
  -1  -3 -23 1641.12 180.523   3
  -1   3 -23 1463.45 167.568   3
  -1  -4  25 660.525 132.042   4
  -1  -4  24 200.778 102.279   4
   1   4 -24-20.7209 80.3844   3
   1  -4 -23 1371.34 161.739   3
  -1  -4  23 1826.76 182.824   4
   1   4 -23 1486.69 175.815   3
   1   4 -22 5902.20 320.170   3
  -1  -4  22 5381.77 293.966   4
   1  -4 -22 5412.08 309.280   3
  -1  -4  21 2919.14 212.134   4
   1   4 -21 2391.45 200.020   3
   1  -4 -21 2926.00 217.562   3
  -1  -4  20 11300.2 410.085   4
   1  -4 -20 12306.3 437.036   3
   1   4 -20 12050.1 431.105   3
  -1  -4  19 7277.49 313.322   4
   1   4 -19 7170.40 318.863   3
   1  -4 -19 7141.24 316.738   3
   1  -4 -18 12958.9 421.280   3
  -1  -4  18 13091.9 417.300   4
   1   4 -18 12963.8 421.560   3
   1   4 -17 9396.66 343.301   3
   1  -4 -17 9167.69 338.424   3
  -1  -4  17 9888.92 345.642   4
   1   4 -16 3235.03 191.638   3
   1  -4 -16 3600.43 201.129   3
   1   4 -15 1280.23 118.873   3
   1  -4 -15 1190.29 118.525   3
   1   4 -14 7720.56 276.104   3
   1  -4 -14 7408.30 270.875   3
   1  -4 -13 2943.09 161.722   3
   1   4 -13 2867.62 162.075   3
   1   4 -12 1949.04 127.694   3
   1  -4 -12 2011.42 130.034   3
  -1  -4  11 3761.89 175.045   4
   1  -4 -11 3856.66 170.869   3
   1  -4 -11 3976.61 140.224   1
   1   4 -11 3976.50 170.647   3
   1  -4 -10 22283.9 390.828   1
   1   4 -10 22224.9 436.974   3
  -1  -4  10 22112.6 450.557   4
   1  -4 -10 22358.6 445.773   3
   1  -4  -9 621.254 52.9365   1
   1   4  -9 672.674 65.1615   6
   1  -4  -9 617.029 70.8910   3
   1   4  -9 735.068 68.9954   3
  -1  -4   9 681.769 71.8038   4
   1  -4  -8 38898.1 562.012   1
   1   4  -8 38553.6 592.296   6
  -1   4   8 35893.1 598.233   2
   1  -4  -8 38603.2 603.506   2
  -1  -4   8 37224.0 612.802   4
   1   4  -8 37455.6 595.151   3
  -1  -4   8 37340.4 592.458   3
  -1  -4   7 1511.51 85.4558   3
   1  -4  -7 1658.36 91.1736   2
   1   4  -7 1532.22 88.3701   3
  -1   4   7 1659.74 91.9404   2
   1  -4  -7 1571.18 79.2185   1
  -1  -4   7 1535.34 88.6586   5
  -1  -4   7 1639.51 96.4773   4
   1   4  -7 1657.01 89.2280   6
   1   4  -6 42540.4 602.842   6
  -1  -4   6 40526.7 619.058   4
  -1  -4   6 41365.6 602.421   3
  -1  -4   6 40404.6 599.576   5
   1   4  -6 41101.6 603.548   3
   1   4  -6 39815.0 596.629   7
   1  -4  -6 40814.0 594.667   2
  -1   4   6 40762.5 599.254   2
   1  -4  -6 41235.5 580.095   1
  -1  -4   5 8937.42 199.296   5
  -1   4   5 9008.98 194.138   2
   1  -4  -5 8683.55 188.432   1
  -1  -4   5 9069.76 200.228   3
  -1  -4   5 9192.60 215.624   4
   1  -4  -5 8684.75 190.169   2
   1   4  -5 8535.80 197.488   3
   1   4  -5 8524.20 196.126   7
  -1   4   5 8812.28 191.152   1
  -1   4   4 4244.27 121.142   1
   1   4  -4 4033.49 122.201   7
   1   4  -4 4046.69 134.344   4
  -1   4   4 4125.94 112.622   2
   1   4  -4 3837.71 119.442   3
   1  -4  -4 4068.15 111.011   2
  -1  -4   4 4049.35 119.759   5
   1  -4  -4 4073.62 117.986   1
  -1  -4   4 3948.20 118.245   3
  -1  -4   4 4124.47 132.280   4
   1   4  -4 4036.15 119.876   5
  -1  -4   3 879.881 58.0021   7
   1   4  -3 909.562 61.5069   4
  -1  -4   3 930.735 64.2648   4
   1   4  -3 952.822 56.8786   7
  -1  -4   3 1010.46 56.7759   3
   1   4  -3 1094.90 60.1929   5
  -1  -4   3 878.282 54.0609   5
  -1   4   3 883.219 46.5076   2
   1   4  -3 1042.74 58.3421   3
   1  -4  -3 964.952 47.5992   2
  -1   4   3 891.414 56.7630   1
  -1  -4   2 6559.59 152.290   7
  -1   4   2 6715.63 122.529   2
   1  -4  -2 6600.24 151.826   7
   1   4  -2 6768.26 153.146   1
   1   4  -2 6853.90 154.288   7
   1   4  -2 6804.31 151.762   3
  -1  -4   2 6762.47 162.497   4
   1  -4  -2 6936.00 125.105   2
   1   4  -2 6782.98 162.929   4
  -1  -4   2 6407.40 145.729   5
  -1   4   2 6699.44 129.921   5
   1   4  -2 6647.12 146.755   5
  -1  -4   2 6499.57 149.280   3
  -1   4   2 6524.68 153.161   1
  -1  -4   1 10037.0 191.498   3
  -1   4   1 9642.00 192.594   7
   1   4  -1 9716.79 185.580   5
  -1   4   1 10044.3 159.175   5
   1   4  -1 10108.0 202.419   4
   1   4  -1 9668.12 192.475   7
  -1  -4   1 9861.95 193.979   7
  -1   4   1 9884.68 150.920   2
   1   4  -1 10114.2 196.246   1
   1  -4  -1 10165.0 153.499   2
  -1  -4   1 10104.2 188.709   5
   1  -4  -1 9679.25 191.894   7
   1  -4   0 135038. 1558.91   2
   1  -4   0 139952. 1573.94   3
  -1  -4   0 134398. 1608.78   2
   1   4   0 136517. 1629.26   1
  -1  -4   0 129563. 1626.97   1
  -1  -4   0 133593. 1614.55   5
   1  -4   0 135361. 1566.24   5
   1   4   0 136857. 1612.88   5
  -1   4   0 136305. 1564.70   5
  -1  -4   0 137491. 1622.07   3
   1   4   0 134361. 1629.93   4
  -1   4   0 132972. 1623.08   7
   1  -4   0 135881. 1625.11   7
  -1  -4   0 141218. 1629.35   7
   1   4   1 40921.6 552.526   5
   1  -4   1 41085.3 559.626   7
   1   4   1 40702.7 544.859   2
   1  -4   1 40378.0 508.878   3
  -1  -4  -1 41115.1 566.080   1
  -1   4  -1 40122.6 562.205   4
   1  -4   1 40497.1 505.538   5
  -1   4  -1 41293.0 510.656   3
  -1  -4  -1 40771.3 546.059   2
   1   4   1 40384.7 564.448   1
  -1   4  -1 39132.5 558.436   7
  -1   4  -1 41077.2 506.237   5
  -1  -4  -1 40472.3 553.985   5
   1   4   2 47745.9 640.184   5
  -1   4  -2 48298.2 647.282   4
  -1  -4  -2 47457.8 652.163   1
   1   4   2 47016.5 651.662   1
   1  -4   2 47877.9 594.993   3
   1  -4   2 47043.8 595.089   5
  -1   4  -2 47668.4 648.670   7
  -1  -4  -2 47044.5 637.651   2
   1   4   2 47852.4 634.487   2
  -1   4  -2 47877.7 596.203   3
  -1  -4  -3 8850.77 198.568   1
  -1   4  -3 8750.39 197.400   7
   1   4   3 9140.77 194.759   2
   1  -4   3 8993.76 168.086   5
  -1   4  -3 9050.35 165.702   3
   1   4   3 8914.85 197.546   5
   1  -4   3 9632.50 167.560   3
  -1   4  -3 9248.31 197.822   4
  -1  -4  -3 9278.97 195.361   2
   1  -4   3 9276.13 197.932   4
  -1  -4  -4 179778. 2148.45   1
   1  -4   4 179578. 2104.33   5
  -1   4  -4 181122. 2153.25   7
  -1   4  -4 178066. 2144.38   4
   1  -4   4 176175. 2138.81   4
   1  -4   4 182013. 2099.65   3
   1   4   4 178768. 2146.79   2
  -1   4  -4 181128. 2093.71   6
  -1  -4  -4 177396. 2145.05   2
  -1   4  -4 176431. 2099.09   3
   1  -4   5 589.129 54.1490   4
  -1  -4  -5 467.783 50.2483   1
   1  -4   5 695.874 48.9215   3
  -1  -4  -5 625.719 59.0154   2
  -1   4  -5 591.599 47.4396   3
  -1   4  -5 603.570 46.2238   6
   1   4   5 626.340 56.7946   2
  -1   4  -6 78691.5 1020.47   3
  -1   4  -6 79677.2 1004.85   6
  -1  -4  -6 76804.7 1041.61   1
   1   4   6 77525.1 1059.70   2
  -1  -4  -6 78055.7 1062.26   2
   1  -4   6 80927.6 1046.16   4
   1  -4   6 80442.5 1019.26   3
  -1  -4  -7 148.890 49.9535   2
   1  -4   7 144.460 37.9672   4
   1   4   7 94.1126 44.7072   2
  -1   4  -7 108.084 31.7938   3
  -1  -4  -7 204.963 45.0071   1
   1  -4   7 117.810 31.9500   3
  -1  -4  -8 18036.6 353.958   1
   1  -4   8 18959.8 352.254   3
  -1  -4  -8 18750.2 385.922   2
  -1   4  -8 18615.0 356.496   3
   1  -4   8 18663.4 361.924   4
   1  -4   8 17619.9 368.474   2
  -1   4  -9 4896.44 168.882   3
   1  -4   9 4808.69 169.607   4
  -1  -4  -9 4807.21 185.242   2
  -1   4 -10 307.283 57.4032   3
   1  -4  10 325.110 52.5926   4
  -1  -4 -10 334.055 71.1582   2
  -1   4 -11 3486.53 159.393   3
   1  -4  11 3621.05 158.258   4
  -1  -4 -11 3476.07 174.654   2
  -1   4 -12 7135.05 241.309   3
  -1  -4 -12 6996.66 257.336   2
  -1  -4 -12 6722.43 250.928   3
   1  -4  12 6812.42 230.535   4
   1  -4  13 7357.07 247.806   4
  -1   4 -13 7313.79 256.031   3
  -1  -4 -13 7615.11 273.974   3
   1  -4  14 15916.3 399.409   4
  -1  -4 -14 16239.1 430.395   3
  -1   4 -14 16213.2 417.042   3
   1  -4  15 15307.1 401.214   4
  -1   4 -15 15365.0 421.949   3
  -1  -4 -15 15362.5 430.333   3
  -1  -4 -16 7317.63 295.861   3
   1  -4  16 7546.88 278.598   4
  -1   4 -16 7591.95 295.426   3
   1  -4  17 6149.97 259.921   4
  -1   4 -17 6207.45 277.451   3
  -1  -4 -17 6253.09 283.746   3
  -1   4 -18 13628.7 436.129   3
  -1  -4 -18 13020.4 432.107   3
   1  -4  18 13362.5 405.291   4
  -1  -4 -19 763.130 124.510   3
  -1   4 -19 676.618 104.376   3
   1  -4  19 1186.37 125.972   4
  -1  -4 -20 486.854 99.7495   3
  -1   4 -20 462.386 97.7776   3
   1  -4  20 565.383 98.4817   4
   1  -4  21 1158.54 136.474   4
  -1  -4 -21 1233.91 158.221   3
  -1   4 -21 951.593 134.886   3
   1  -4  22 1190.59 140.531   4
  -1  -4 -22 1250.51 159.274   3
  -1   4 -22 1411.54 166.264   3
  -1   4 -23 53.4106 75.2449   3
  -1  -4 -23 122.866 78.2838   3
   1  -4  23-2.35437 71.9276   4
  -1  -5  24 1840.88 182.169   4
   1  -5 -23 6051.76 332.961   3
   1   5 -23 6003.52 335.016   3
  -1  -5  23 6148.48 322.371   4
   1   5 -22 1351.63 171.230   3
   1  -5 -22 969.556 141.245   3
  -1  -5  22 1276.54 152.242   4
   1   5 -21 6083.51 317.350   3
   1  -5 -21 7152.80 340.762   3
  -1  -5  21 6989.00 325.765   4
   1  -5 -20 146.818 67.7432   3
  -1  -5  20 100.460 62.2773   4
   1   5 -20 128.238 74.6829   3
  -1  -5  19 1392.00 145.717   4
   1   5 -19 1286.34 141.599   3
   1  -5 -19 1270.85 138.145   3
   1   5 -18 434.018 95.2013   3
  -1  -5  18 413.261 90.6592   4
   1  -5 -18 335.682 79.2804   3
  -1  -5  17 1233.13 128.531   4
   1   5 -17 1081.94 122.385   3
   1  -5 -17 1093.51 123.554   3
   1  -5 -16 4454.13 226.322   3
  -1  -5  16 4537.63 227.748   4
   1   5 -16 4567.97 227.072   3
   1   5 -15 20850.8 502.387   3
  -1  -5  15 20575.1 504.678   4
   1  -5 -15 20451.4 502.402   3
  -1  -5  14 2796.48 167.632   4
   1   5 -14 2551.89 158.581   3
   1  -5 -14 3112.96 178.374   3
  -1  -5  13 21545.8 492.347   4
   1   5 -13 21561.4 482.366   3
   1  -5 -13 22393.7 494.056   3
   1  -5 -12 2151.45 135.935   3
   1   5 -12 2211.16 134.832   3
  -1  -5  12 2103.10 136.047   4
   1  -5 -11 16017.0 381.664   3
   1   5 -11 16888.6 381.164   3
  -1  -5  11 15992.2 388.174   4
   1   5 -10 6338.23 205.128   6
   1   5 -10 6481.29 212.648   3
   1  -5 -10 6442.75 217.729   3
  -1  -5  10 6540.66 223.010   4
   1   5  -9 1238.45 89.6953   6
   1   5  -9 1192.83 90.2619   3
   1  -5  -9 1146.15 77.2788   1
  -1  -5   9 1024.01 87.5779   4
   1  -5  -9 1121.96 89.5901   2
   1   5  -8 27137.9 463.766   6
  -1  -5   8 25875.4 482.682   4
   1  -5  -8 26328.0 441.629   1
  -1   5   8 25733.1 466.465   2
   1   5  -8 26425.7 466.406   3
   1  -5  -8 25911.4 462.351   2
  -1   5   7 1239.57 81.3187   2
   1   5  -7 1146.65 78.2626   6
   1  -5  -7 1215.04 79.1145   2
   1  -5  -7 1278.21 80.1302   1
  -1  -5   7 1189.13 87.8645   4
   1   5  -7 1346.19 85.5543   3
  -1  -5   7 1258.52 81.5371   3
  -1  -5   7 1246.35 79.3282   5
   1  -5  -6 3809.07 129.600   1
   1   5  -6 3690.70 133.637   7
   1  -5  -6 3725.58 127.120   2
  -1   5   6 3717.76 128.527   1
   1   5  -6 3636.14 129.687   6
  -1   5   6 3600.17 126.126   2
  -1  -5   6 3831.61 147.449   4
  -1  -5   6 3405.25 126.393   5
   1   5  -6 3596.33 131.368   3
  -1  -5   6 3667.78 129.945   3
   1  -5  -5 28562.8 437.911   2
  -1  -5   5 29447.1 481.743   4
  -1   5   5 28901.3 454.048   1
   1   5  -5 28657.1 454.506   3
   1   5  -5 28495.5 461.792   7
   1   5  -5 27585.3 478.829   4
   1  -5  -5 28208.8 450.999   1
  -1  -5   5 28694.7 451.890   3
  -1  -5   5 28299.5 450.299   5
  -1   5   5 27892.0 437.388   2
  -1  -5   4 10745.9 223.631   5
   1   5  -4 11357.0 227.870   5
   1   5  -4 11335.1 252.964   4
  -1   5   4 11152.7 210.540   2
  -1   5   4 10552.5 227.525   1
  -1  -5   4 10704.6 225.313   3
   1   5  -4 11056.5 230.313   3
   1   5  -4 10785.3 233.993   7
  -1  -5   4 10728.3 246.242   4
   1  -5  -4 10810.7 209.185   2
  -1   5   3 92369.3 1145.77   5
   1   5  -3 95897.9 1179.82   1
  -1  -5   3 94860.5 1187.15   7
  -1  -5   3 95231.5 1206.63   4
   1   5  -3 93655.8 1167.45   5
  -1   5   3 93290.4 1134.83   2
  -1  -5   3 94372.2 1172.81   3
  -1   5   3 93225.1 1184.12   1
  -1  -5   3 92036.1 1166.71   5
   1  -5  -3 92406.9 1135.30   2
   1   5  -3 94234.7 1205.52   4
   1   5  -3 91141.1 1184.48   7
   1   5  -3 93611.2 1174.70   3
   1  -5  -3 95166.5 1185.12   7
  -1  -5   2 2543.53 106.025   4
   1   5  -2 2560.74 99.8813   7
   1   5  -2 2661.86 101.737   1
   1   5  -2 2662.31 94.8290   5
  -1   5   2 2788.66 81.9474   5
   1   5  -2 2755.40 98.5425   3
  -1  -5   2 2674.09 101.462   7
   1   5  -2 2671.15 105.722   4
  -1   5   2 2741.35 75.7477   2
   1  -5  -2 2663.25 102.623   7
  -1  -5   2 2600.97 93.4601   5
   1  -5  -2 2694.15 77.1628   2
  -1   5   2 2660.67 103.643   1
  -1  -5   2 2664.55 95.1023   3
   1   5  -1 106826. 1377.74   4
   1   5  -1 113160. 1351.13   5
   1  -5  -1 109813. 1298.90   2
  -1  -5   1 108837. 1370.54   7
   1   5  -1 110671. 1371.88   7
  -1  -5   1 111190. 1352.39   5
   1   5  -1 112365. 1375.03   1
   1  -5  -1 111341. 1369.87   7
  -1   5   1 109779. 1306.97   5
  -1  -5   1 114077. 1362.39   3
  -1  -5   1 111909. 1346.33   2
  -1   5   1 110488. 1374.99   1
   1   5   0 14539.3 256.590   5
  -1   5   0 14550.3 270.474   7
   1   5   0 15098.6 285.888   4
   1  -5   0 14602.6 223.411   5
   1   5   0 14779.2 275.610   1
  -1  -5   0 15049.9 261.945   5
  -1  -5   0 14235.4 270.503   7
   1  -5   0 14735.6 216.664   2
  -1  -5   0 14992.4 266.174   3
  -1   5   0 14303.1 220.942   5
   1  -5   0 14767.1 272.255   7
   1  -5   0 14208.3 229.232   3
  -1  -5   0 14595.7 254.564   2
  -1   5  -1 75187.1 990.371   7
  -1  -5  -1 79030.5 998.019   7
  -1  -5  -1 76262.4 976.924   5
  -1   5  -1 77209.6 922.693   5
  -1  -5  -1 76220.5 966.828   2
   1  -5   1 76093.3 923.282   5
   1   5   1 78307.7 999.534   1
  -1  -5  -1 74962.1 995.419   1
   1   5   1 76275.9 972.662   5
  -1   5  -1 76094.4 995.335   4
   1  -5   1 76425.4 928.104   3
   1   5   1 75671.5 962.642   2
   1  -5   1 77974.4 991.978   7
  -1  -5  -2 1123.37 69.3159   1
   1   5   2 950.311 68.6965   1
   1   5   2 1004.13 64.0869   5
   1   5   2 1083.45 61.1712   2
   1  -5   2 1046.68 48.4902   3
  -1   5  -2 1210.72 70.5603   7
  -1   5  -2 1236.95 72.4424   4
  -1  -5  -2 1111.87 64.2884   2
  -1   5  -2 1125.71 51.5075   3
  -1   5  -2 1182.54 52.3153   5
   1  -5   2 1014.35 48.3002   5
   1  -5   2 1236.65 74.5151   7
  -1   5  -3 14695.2 289.147   7
   1  -5   3 14946.9 245.030   3
  -1  -5  -3 14434.7 275.638   2
   1   5   3 14620.7 280.028   5
   1   5   3 14498.8 272.959   2
  -1   5  -3 15025.0 289.643   4
   1   5   3 15114.1 293.650   1
  -1  -5  -3 14963.4 292.303   1
  -1   5  -3 14843.4 245.100   3
   1  -5   3 14959.0 245.308   5
  -1   5  -4 8956.86 217.522   7
   1  -5   4 8376.00 178.701   3
   1   5   4 8982.46 214.702   5
  -1  -5  -4 8778.29 216.128   1
  -1  -5  -4 9212.30 213.134   2
   1  -5   4 9124.73 218.520   4
   1  -5   4 8866.98 184.520   5
  -1   5  -4 9174.52 186.009   3
   1   5   4 9306.54 213.166   2
  -1  -5  -5 4212.67 146.222   2
  -1   5  -5 4366.29 126.244   3
   1  -5   5 4079.66 124.392   5
  -1   5  -5 4561.95 124.550   6
  -1  -5  -5 4032.20 142.785   1
   1  -5   5 4443.86 124.937   3
   1  -5   5 4294.40 145.793   4
  -1   5  -5 4269.34 144.456   4
   1   5   5 4382.65 144.932   2
   1  -5   6 8231.98 197.292   5
  -1  -5  -6 8191.63 217.578   1
  -1   5  -6 8496.08 198.555   3
   1   5   6 8300.25 221.109   2
  -1   5  -6 8471.12 189.975   6
   1  -5   6 8756.13 220.577   4
  -1  -5  -6 8309.37 222.016   2
   1  -5   6 8518.04 194.726   3
  -1   5  -7 15122.7 298.944   3
  -1  -5  -7 14652.0 326.785   2
   1  -5   7 14750.2 291.953   3
  -1   5  -7 14970.6 285.262   6
   1  -5   7 15343.2 319.787   4
  -1   5  -8 19914.7 373.939   3
   1  -5   8 19760.8 371.253   3
  -1  -5  -8 19462.0 405.561   2
   1  -5   8 20155.5 391.935   4
  -1  -5  -9 33842.0 603.038   2
   1  -5   9 33747.0 580.442   4
  -1   5  -9 34734.4 570.022   3
  -1   5 -10 8744.74 250.212   3
   1  -5  10 9031.13 256.157   4
  -1  -5 -10 8866.87 273.979   2
  -1  -5 -11 27564.1 557.492   2
  -1   5 -11 27973.4 528.150   3
   1  -5  11 27069.5 523.789   4
  -1  -5 -12 1825.40 133.565   2
  -1   5 -12 1581.05 115.448   3
   1  -5  12 1670.16 115.363   4
  -1  -5 -13 25540.7 555.413   3
   1  -5  13 24574.0 514.234   4
  -1   5 -13 25239.4 527.969   3
  -1  -5 -13 23541.5 544.644   2
  -1   5 -14 640.456 89.4392   3
  -1  -5 -14 474.708 85.6523   3
   1  -5  14 448.194 70.3035   4
  -1  -5 -15 581.184 96.3699   3
  -1   5 -15 481.991 83.1880   3
   1  -5  15 642.894 87.2416   4
  -1   5 -16 284.828 70.0384   3
   1  -5  16 265.210 60.2079   4
  -1  -5 -16 296.095 68.1854   3
  -1   5 -17 2667.08 184.044   3
   1  -5  17 2822.46 178.983   4
  -1  -5 -17 2760.04 190.588   3
  -1   5 -18 1089.36 128.898   3
   1  -5  18 1378.17 130.557   4
  -1  -5 -18 1549.68 151.683   3
   1  -5  19 7395.28 305.413   4
  -1  -5 -19 7510.89 335.852   3
  -1   5 -19 7415.39 327.939   3
  -1  -5 -20 4343.28 264.739   3
   1  -5  20 4345.77 239.594   4
  -1   5 -20 4245.65 256.257   3
   1  -5  21 9591.99 373.081   4
  -1  -5 -21 9641.30 405.764   3
  -1   5 -21 9477.38 398.304   3
   1  -5  22 2684.29 199.539   4
  -1   5 -22 2764.35 225.743   3
  -1  -5 -22 2510.08 217.419   3
   1  -5  23 3934.50 253.176   4
  -1   5 -23 3587.37 255.778   3
  -1  -6  24 343.546 96.9950   4
   1   6 -23 805.448 143.976   3
  -1  -6  23 632.713 120.088   4
  -1  -6  22 3056.04 223.291   4
   1   6 -22 3153.40 243.262   3
   1  -6 -22 2880.95 227.613   3
   1  -6 -21 7180.44 348.096   3
   1   6 -21 7224.79 348.922   3
  -1  -6  21 7671.26 347.009   4
  -1  -6  20 4137.33 250.662   4
   1   6 -20 4306.14 258.660   3
   1  -6 -20 4105.67 251.454   3
  -1  -6  19 11793.6 413.494   4
   1   6 -19 11509.7 416.191   3
   1  -6 -19 11945.8 422.763   3
  -1  -6  18 12405.9 415.906   4
   1  -6 -18 12718.6 423.599   3
   1   6 -18 12607.0 422.962   3
  -1  -6  17 14896.4 444.776   4
   1   6 -17 14592.0 442.878   3
   1  -6 -17 14443.0 441.453   3
   1   6 -16 8531.47 317.955   3
  -1  -6  16 8440.81 317.708   4
   1  -6 -16 8492.79 318.498   3
   1   6 -15 10435.0 341.008   3
   1  -6 -15 10262.9 341.892   3
  -1  -6  15 9934.48 338.063   4
   1  -6 -14 366.763 75.1245   3
   1   6 -14 306.121 72.7249   3
  -1  -6  14 289.846 70.5453   4
  -1  -6  13 104.671 61.3350   4
   1   6 -13 55.9426 47.6999   3
   1  -6 -13 114.486 60.1623   3
   1   6 -12 185.719 59.8877   3
  -1  -6  12 275.745 66.7600   4
   1  -6 -12 360.751 68.2738   3
   1  -6 -11 5583.31 212.083   3
   1   6 -11 5089.58 200.602   3
   1   6 -11 5664.48 202.967   6
  -1  -6  11 5258.74 212.006   4
  -1  -6  10 2034.85 129.408   4
   1   6 -10 2034.34 117.597   6
   1   6 -10 2257.43 129.184   3
   1  -6 -10 2588.69 137.817   2
   1   6  -9 10587.1 274.802   3
  -1  -6   9 10067.1 284.661   4
   1   6  -9 10416.7 268.288   6
   1  -6  -9 11244.8 280.626   2
   1  -6  -8 4624.15 164.287   2
  -1  -6   8 4151.68 170.938   4
   1   6  -8 4097.14 157.602   3
   1   6  -8 4445.26 159.371   6
  -1  -6   7 49406.7 757.603   4
   1  -6  -7 46958.2 711.538   2
  -1  -6   7 48237.7 720.489   3
   1   6  -7 48836.2 723.634   3
   1   6  -7 50227.4 725.428   6
  -1   6   7 46865.4 715.416   2
  -1  -6   6 8972.16 223.937   3
  -1   6   6 8517.86 211.076   2
   1  -6  -6 9089.86 215.643   2
  -1  -6   6 8838.16 220.100   5
  -1   6   6 8906.10 225.439   1
   1   6  -6 8720.27 222.513   3
  -1  -6   6 8948.09 242.758   4
  -1  -6   5 9492.73 221.131   5
   1  -6  -5 9256.92 209.473   2
  -1  -6   5 9830.97 248.630   4
  -1   6   5 9625.99 210.845   2
  -1   6   5 10030.2 235.974   1
  -1  -6   5 9523.23 220.549   3
   1   6  -5 8891.89 221.899   3
  -1  -6   4 5644.24 159.437   3
  -1  -6   4 5628.17 168.565   7
  -1   6   4 5680.85 168.491   1
  -1   6   4 5511.94 141.577   2
   1   6  -4 5593.84 156.704   5
  -1   6   4 5454.66 148.834   5
  -1  -6   4 5532.08 155.354   5
   1   6  -4 5444.40 158.131   3
   1  -6  -4 5067.30 160.742   7
  -1  -6   4 5452.98 177.007   4
   1  -6  -4 5479.20 143.009   2
   1   6  -3 3730.33 124.982   3
   1   6  -3 3741.15 139.880   4
   1   6  -3 3379.61 127.601   7
   1   6  -3 3626.89 119.738   5
  -1  -6   3 3688.05 122.270   3
  -1   6   3 3566.73 132.102   1
  -1   6   3 3750.41 112.985   5
  -1  -6   3 3846.10 133.572   7
   1  -6  -3 3950.11 108.108   2
  -1  -6   3 3595.91 120.706   5
   1   6  -3 3736.92 129.873   1
  -1   6   3 3668.79 103.636   2
   1  -6  -3 3759.57 133.356   7
  -1  -6   3 3667.94 143.999   4
   1   6  -2 28.7255 29.2555   5
  -1   6   2-4.32260 34.5723   1
  -1  -6   2 10.0560 34.7178   7
  -1  -6   2 6.36319 23.8849   5
  -1   6   2 11.4087 17.3068   2
   1   6  -2-23.3204 34.8856   1
   1  -6  -2-6.23905 19.6386   2
   1  -6  -2 36.7968 33.5949   7
  -1  -6   2 48.4750 27.4571   3
   1   6  -2 6.24220 29.5899   4
   1   6  -2 31.7721 27.9977   7
  -1   6   2 41.2526 27.3858   5
  -1   6   1 12608.3 267.064   1
  -1  -6   1 12598.0 264.242   7
   1   6  -1 12699.4 264.553   7
   1   6  -1 12883.0 267.379   1
  -1  -6   1 12997.4 242.372   2
   1  -6  -1 12979.7 265.589   7
  -1  -6   1 12351.1 251.204   3
  -1  -6   1 12618.4 247.091   5
   1   6  -1 12968.6 274.095   4
   1   6  -1 12387.9 242.860   5
  -1   6   1 12667.6 215.615   5
   1  -6  -1 13091.8 210.821   2
   1  -6   0 5362.04 123.958   3
   1  -6   0 5263.51 119.676   5
   1   6   0 4896.53 155.004   1
  -1   6   0 5277.35 155.858   7
   1   6   0 5102.83 176.476   4
  -1  -6   0 4886.82 136.310   2
   1  -6   0 5159.01 112.128   2
  -1  -6   0 5216.04 144.276   5
  -1  -6   0 5144.07 146.060   3
   1   6   0 5024.80 140.075   5
  -1  -6   0 5168.56 156.978   7
   1  -6   0 5128.60 154.370   7
  -1   6   0 5085.43 115.626   5
  -1  -6  -1 30319.6 498.173   7
   1  -6   1 30821.3 434.231   5
  -1   6  -1 30388.5 497.966   7
   1   6   1 31718.2 506.263   1
   1  -6   1 31159.6 440.282   3
   1  -6   1 30986.9 426.717   2
   1  -6   1 31822.8 501.151   7
  -1  -6  -1 31487.1 473.139   2
   1   6   1 30767.0 475.009   5
  -1   6  -1 31604.3 506.947   4
  -1   6  -1 30837.4 431.606   5
  -1  -6  -1 29814.5 500.552   1
  -1   6  -2 18822.4 291.820   5
   1  -6   2 18828.8 350.721   7
  -1  -6  -2 18860.8 329.339   2
   1  -6   2 19071.7 294.891   3
  -1   6  -2 19198.3 300.281   3
   1   6   2 18141.7 321.440   2
   1   6   2 18917.4 333.253   5
   1   6   2 18402.5 352.208   1
  -1  -6  -2 18726.6 351.399   7
   1  -6   2 19068.8 293.620   5
  -1  -6  -2 18444.9 352.778   1
  -1   6  -2 18611.7 352.561   4
  -1   6  -2 19116.0 351.692   7
  -1  -6  -3 38960.9 572.959   2
   1   6   3 38288.6 568.939   2
  -1  -6  -3 38811.6 599.119   1
   1   6   3 37826.1 574.362   5
   1  -6   3 37956.7 527.676   3
   1   6   3 39057.7 599.728   1
   1  -6   3 38503.8 528.571   5
  -1   6  -3 39533.1 534.591   3
  -1   6  -3 37305.0 591.915   4
  -1   6  -4 3534.40 136.675   4
   1  -6   4 3355.14 107.388   5
  -1  -6  -4 3368.82 127.304   2
  -1   6  -4 3432.26 109.598   3
   1   6   4 3483.66 125.957   2
   1   6   4 3643.87 135.054   5
   1  -6   4 3592.48 140.518   4
   1  -6   4 3384.03 107.552   3
  -1  -6  -5 39311.4 610.396   2
   1   6   5 38729.3 604.987   2
   1  -6   5 39416.5 619.792   4
   1  -6   5 39796.6 565.899   3
  -1   6  -5 39847.1 567.042   3
   1   6   5 39741.5 619.448   5
   1  -6   5 38835.7 566.150   5
  -1   6  -6 3495.62 122.220   3
  -1  -6  -6 3508.22 141.207   2
   1   6   6 3474.41 139.154   2
   1  -6   6 3740.69 124.150   3
  -1   6  -6 3630.68 121.323   6
   1  -6   6 3495.78 123.627   5
   1   6   6 3477.02 145.367   5
   1  -6   6 3603.71 144.754   4
  -1  -6  -7 17667.5 375.666   2
   1  -6   7 17853.0 344.008   5
   1  -6   7 18397.2 339.075   3
   1  -6   7 18441.6 374.720   4
  -1   6  -7 18035.7 342.176   3
  -1   6  -7 17769.9 330.127   6
  -1  -6  -8 2278.12 122.902   2
  -1   6  -8 2441.39 109.506   6
   1  -6   8 2444.83 126.776   4
  -1   6  -8 2489.50 116.845   3
   1  -6   8 2413.96 111.034   3
  -1  -6  -9 795.668 83.6468   2
  -1   6  -9 709.778 71.4415   3
   1  -6   9 677.505 74.8656   4
   1  -6  10 2573.70 136.911   4
  -1   6 -10 2402.33 128.753   3
  -1  -6 -10 2640.40 148.148   2
  -1   6 -11 6468.96 222.930   3
   1  -6  11 6475.60 229.083   4
  -1  -6 -11 6635.10 244.490   2
  -1  -6 -12 15664.8 415.491   2
   1  -6  12 16623.1 399.963   4
  -1   6 -12 16035.9 390.592   3
   1  -6  13 21337.5 479.592   4
  -1  -6 -13 21245.0 508.147   2
  -1   6 -13 20963.3 477.764   3
  -1   6 -14 15084.0 406.831   3
  -1  -6 -14 14651.2 423.302   3
  -1  -6 -14 15512.9 434.922   2
   1  -6  14 15319.9 402.901   4
  -1   6 -15 21841.8 525.111   3
   1  -6  15 21694.2 510.320   4
  -1  -6 -15 21971.6 545.067   3
  -1   6 -16 9358.27 335.584   3
   1  -6  16 9283.68 322.554   4
  -1  -6 -16 9627.67 352.843   3
  -1  -6 -17 11742.4 401.041   3
  -1   6 -17 10660.2 374.921   3
   1  -6  17 11068.5 365.486   4
  -1   6 -18 6762.18 304.692   3
  -1  -6 -18 6614.71 311.047   3
   1  -6  18 6636.96 286.168   4
  -1   6 -19 4148.44 248.384   3
   1  -6  19 4358.57 238.130   4
  -1  -6 -19 4014.88 255.729   3
   1  -6  20 3728.79 227.456   4
  -1   6 -20 3861.38 245.037   3
  -1  -6 -20 3702.23 249.161   3
   1  -6  21 65.8767 67.7498   4
  -1  -6 -21-5.98078 77.7318   3
  -1   6 -21-21.6386 74.9555   3
  -1  -6 -22 71.3920 66.6740   3
   1  -6  22 81.1964 73.6135   4
  -1   6 -22 41.8692 79.1385   3
   1  -6  23 1215.76 144.484   4
  -1   6 -23 1230.52 164.616   3
   1   7 -23 960.439 150.161   3
  -1  -7  23 948.989 138.919   4
  -1  -7  22 5819.62 318.023   4
   1   7 -22 6178.01 336.520   3
   1  -7 -22 5733.22 321.103   3
  -1  -7  21 180.084 79.7583   4
   1   7 -21 117.491 82.3575   3
   1  -7 -21 133.413 73.6438   3
  -1  -7  20 2053.70 182.925   4
   1  -7 -20 2096.85 184.591   3
   1   7 -20 2067.22 187.582   3
  -1  -7  19 159.172 71.3981   4
   1  -7 -19 72.6153 61.8982   3
   1   7 -19 91.3634 63.8181   3
  -1  -7  18 549.796 100.764   4
   1   7 -18 359.666 87.7529   3
   1  -7 -18 366.111 92.6833   3
   1   7 -17 271.412 73.6128   3
   1  -7 -17 88.3341 58.6009   3
  -1  -7  17 173.302 69.3434   4
  -1  -7  16 7681.04 308.271   4
   1  -7 -16 7835.31 311.844   3
   1   7 -16 7684.75 305.859   3
  -1  -7  15 1154.11 120.570   4
   1  -7 -15 1163.54 120.972   3
   1   7 -15 1204.06 120.414   3
   1  -7 -14 33357.2 680.425   3
  -1  -7  14 33257.4 686.462   4
   1   7 -14 34754.6 683.283   3
   1   7 -13 895.710 95.3154   3
  -1  -7  13 957.566 105.974   4
   1  -7 -13 1083.58 106.919   3
   1   7 -12 29202.4 578.610   3
   1   7 -12 29607.4 564.747   6
   1  -7 -12 28912.4 586.175   3
  -1  -7  12 28515.2 595.230   4
  -1  -7  11 4447.74 200.308   4
   1  -7 -11 4310.69 188.235   2
   1   7 -11 4391.67 181.941   6
   1   7 -11 4392.13 188.858   3
   1   7 -10 2082.98 122.015   6
  -1  -7  10 2002.59 131.290   4
   1   7 -10 1985.25 121.261   3
   1  -7 -10 2268.13 127.736   2
  -1  -7   9 791.608 87.4325   4
   1   7  -9 776.511 73.6071   6
   1  -7  -9 848.374 77.1435   2
   1   7  -9 921.275 85.5561   3
  -1  -7   8 1483.88 110.130   4
   1   7  -8 1694.28 103.053   6
   1  -7  -8 1599.80 98.7524   2
   1   7  -8 1699.04 103.503   3
  -1   7   7 8622.90 235.903   1
  -1  -7   7 8537.55 255.013   4
   1  -7  -7 8044.02 219.410   2
   1   7  -7 8651.08 233.556   3
  -1   7   7 8061.93 219.901   2
  -1  -7   6 12125.4 270.184   3
  -1   7   6 11144.5 250.378   2
  -1   7   6 11779.4 281.045   1
  -1  -7   6 11672.5 297.732   4
   1   7  -6 10799.0 264.211   3
   1  -7  -6 11267.2 254.370   2
  -1   7   6 11570.2 264.185   5
  -1  -7   5 58.1352 28.5398   5
  -1   7   5 68.5695 40.0061   1
  -1   7   5 82.0875 36.3747   5
  -1   7   5 48.9545 24.2211   2
   1   7  -5 55.3436 35.5637   3
   1  -7  -5 93.2375 46.1705   7
  -1  -7   5 189.597 58.8194   4
   1   7  -5 82.4502 39.2896   5
  -1  -7   5 104.022 35.9575   3
   1  -7  -5 69.1218 31.1272   2
  -1  -7   4 33886.7 575.200   4
   1  -7  -4 33378.8 500.135   2
   1   7  -4 34245.6 547.853   1
   1   7  -4 33812.0 527.783   5
  -1  -7   4 33239.0 532.771   3
   1  -7  -4 33908.8 556.072   7
  -1   7   4 33803.2 554.479   1
  -1  -7   4 33588.9 526.226   5
  -1   7   4 35260.6 514.990   5
  -1  -7   4 33970.8 556.904   7
  -1   7   4 33116.3 494.832   2
   1   7  -4 33699.5 535.572   3
  -1  -7   3 26.6597 29.5439   5
  -1  -7   3 31.4639 28.0623   3
  -1   7   3-6.31064 19.7348   2
   1  -7  -3 56.3477 25.5604   2
   1  -7  -3 66.5949 39.7519   7
   1   7  -3 67.3599 34.6763   5
  -1   7   3 51.2882 37.9979   1
   1   7  -3 65.8321 37.7578   1
  -1  -7   3 21.1127 35.5741   7
  -1   7   3 25.8280 27.2432   5
   1   7  -3 60.1924 31.5555   3
  -1  -7   2 154300. 1898.19   7
   1   7  -2 153840. 1895.52   1
  -1  -7   2 149857. 1857.52   5
  -1  -7   2 152208. 1865.37   3
   1  -7  -2 148866. 1805.94   2
  -1   7   2 153858. 1900.57   1
  -1   7   2 152554. 1819.06   5
   1  -7  -2 154018. 1896.13   7
  -1  -7   2 153662. 1848.80   2
   1   7  -2 153860. 1854.03   5
   1  -7  -1 70.1600 41.3054   7
   1  -7  -1 59.0563 24.9641   2
  -1   7   1 112.182 44.7654   1
   1   7  -1 14.3203 36.1022   1
  -1  -7   1 53.2015 38.3945   7
  -1  -7   1 58.5752 31.9423   5
  -1   7   1 54.1978 24.6853   5
   1  -7  -1 37.0547 23.0299   3
  -1  -7   1 67.8982 31.5865   3
  -1  -7   1 65.3490 30.7301   2
   1   7  -1 40.7213 33.1224   5
   1   7   0 117254. 1452.47   5
  -1  -7   0 115077. 1469.75   3
   1  -7   0 114531. 1408.84   5
   1   7   0 116499. 1499.24   1
   1  -7   0 116805. 1396.50   2
  -1  -7   0 116435. 1461.33   5
  -1  -7   0 115831. 1493.58   7
   1  -7   0 119227. 1496.07   7
  -1   7   0 116652. 1498.33   1
  -1  -7   0 117825. 1449.24   2
  -1   7   0 117290. 1404.02   5
   1  -7   0 117976. 1420.96   3
  -1   7  -1 6261.39 142.248   5
   1  -7   1 6090.22 146.320   3
   1  -7   1 6089.44 135.737   2
   1  -7   1 6439.88 144.462   5
   1   7   1 6422.42 171.386   5
   1  -7   1 6208.30 185.361   7
  -1  -7  -1 6010.19 166.014   2
  -1  -7  -1 6073.47 175.092   3
  -1  -7  -1 6372.51 173.651   5
   1   7   1 6543.97 194.619   1
  -1  -7  -1 6025.73 185.369   7
   1   7   2 45340.1 685.901   1
   1  -7   2 43890.2 674.480   7
  -1  -7  -2 44747.7 642.822   2
   1  -7   2 43669.3 604.165   3
  -1   7  -2 44232.8 597.721   5
   1  -7   2 45396.6 600.091   5
   1   7   2 44044.2 647.197   5
  -1  -7  -2 43751.4 677.461   7
   1   7   2 43288.5 634.067   2
   1  -7   3 122.233 26.7819   3
   1   7   3 87.2651 44.8754   1
  -1  -7  -3 110.240 48.1840   7
   1   7   3 115.241 30.0544   2
   1  -7   3 103.577 28.4776   5
  -1   7  -3 115.947 30.3732   3
  -1  -7  -3 110.586 34.1356   2
   1   7   3 85.6090 34.7237   5
  -1   7  -4 7770.76 179.003   3
  -1  -7  -4 7105.88 199.013   2
   1  -7   4 7261.81 174.700   3
   1   7   4 7220.19 196.432   2
   1   7   4 7278.38 216.355   1
   1   7   4 7377.23 204.883   5
   1  -7   4 7146.49 171.398   5
   1   7   5 26.3562 41.1181   5
   1   7   5 69.6103 32.6357   2
  -1   7  -5 31.2355 26.7934   3
  -1  -7  -5 49.1405 33.0700   2
   1  -7   5 52.2403 45.7997   4
   1  -7   5 75.4507 29.5008   3
   1  -7   5 66.3681 27.3910   5
   1  -7   6 3691.87 157.362   4
   1  -7   6 3321.36 124.221   5
   1   7   6 3345.65 147.151   5
  -1  -7  -6 3431.53 143.903   2
  -1   7  -6 3614.36 128.004   3
   1  -7   6 3296.34 122.690   3
  -1   7  -6 3444.49 122.679   6
   1  -7   7 221.179 39.2080   3
   1   7   7 241.292 64.6153   5
   1  -7   7 162.971 36.4176   5
  -1   7  -7 228.565 47.7868   3
  -1  -7  -7 268.034 54.5956   2
  -1   7  -7 185.335 41.2357   6
   1  -7   7 144.393 50.4160   4
  -1   7  -8 23138.5 415.433   6
  -1   7  -8 23414.8 429.222   3
  -1  -7  -8 23516.7 469.559   2
   1   7   8 23870.7 480.393   5
   1  -7   8 23348.6 468.401   4
  -1  -7  -9 1454.53 109.904   2
  -1   7  -9 1310.40 85.5389   6
   1  -7   9 1250.87 101.517   4
  -1   7  -9 1237.67 90.4748   3
  -1   7 -10 18948.7 407.589   3
  -1  -7 -10 19549.8 444.817   2
   1  -7  10 20053.4 438.791   4
  -1  -7 -11 407.799 71.9788   2
   1  -7  11 479.849 71.9310   4
  -1   7 -11 449.094 68.2501   3
  -1  -7 -12 28018.3 589.978   2
  -1   7 -12 27141.6 547.846   3
   1  -7  12 27052.9 559.370   4
  -1   7 -13 605.981 84.4413   3
   1  -7  13 557.395 84.1931   4
  -1  -7 -13 462.053 83.1158   2
  -1  -7 -14 8124.91 313.385   2
  -1   7 -14 8437.99 294.523   3
   1  -7  14 8379.98 295.567   4
  -1   7 -15 1103.42 116.060   3
   1  -7  15 1399.21 127.520   4
  -1  -7 -15 1223.79 129.081   3
  -1   7 -16-10.9490 57.0720   3
   1  -7  16 102.806 59.6767   4
  -1  -7 -16 23.7278 59.7685   3
  -1   7 -17 41.7214 59.6791   3
  -1  -7 -17 146.825 59.2099   3
   1  -7  17 82.3910 65.0242   4
  -1   7 -18 4971.24 265.026   3
   1  -7  18 5358.37 264.549   4
  -1  -7 -18 4967.37 269.653   3
  -1   7 -19 537.660 110.426   3
   1  -7  19 542.593 94.9630   4
  -1  -7 -19 683.057 131.906   3
  -1   7 -20 6248.59 319.709   3
  -1  -7 -20 6157.11 323.312   3
   1  -7  20 6686.35 308.142   4
  -1  -7 -21 347.084 98.8108   3
  -1   7 -21 531.949 120.376   3
   1  -7  21 288.948 84.2147   4
   1  -7  22 5791.02 303.358   4
  -1   7 -22 5477.36 317.698   3
   1  -7  23 100.240 73.4706   4
  -1   7 -23 208.152 106.216   3
   1   8 -23 874.908 145.258   3
  -1  -8  22 3917.60 261.423   4
   1   8 -22 3829.89 268.344   3
   1  -8 -22 3499.17 256.665   3
   1  -8 -21 6719.78 341.511   3
  -1  -8  21 5852.63 313.948   4
   1   8 -21 6402.01 336.308   3
   1   8 -20 9518.52 398.999   3
  -1  -8  20 9602.56 393.791   4
   1  -8 -20 9718.24 404.989   3
   1  -8 -19 12250.9 437.813   3
  -1  -8  19 11366.8 422.804   4
   1   8 -19 10803.7 413.221   3
  -1  -8  18 17223.8 519.443   4
   1   8 -18 18239.3 531.793   3
   1  -8 -18 18301.9 532.663   3
   1   8 -17 16915.6 496.957   3
  -1  -8  17 16869.3 498.778   4
   1  -8 -17 17543.4 504.626   3
  -1  -8  16 23160.6 587.924   4
   1   8 -16 23836.4 585.850   3
   1  -8 -16 24983.3 599.111   3
  -1  -8  15 6524.68 283.461   4
   1  -8 -15 7043.81 288.034   3
   1   8 -15 7139.06 287.761   3
   1   8 -14 7491.35 285.230   3
   1  -8 -14 6924.17 288.941   3
  -1  -8  14 7229.90 290.547   4
   1  -8 -13 2641.17 167.033   3
   1   8 -13 2897.26 167.920   3
  -1  -8  13 2836.36 177.078   4
   1   8 -12 1223.74 104.482   6
   1   8 -12 1160.23 108.912   3
  -1  -8  12 1001.97 107.416   4
   1   8 -11 562.544 74.0673   6
  -1  -8  11 597.567 90.9522   4
   1   8 -11 627.841 82.2902   3
   1  -8 -11 516.024 71.3603   2
  -1  -8  10 906.791 96.3271   4
   1   8 -10 1223.90 96.2528   6
   1   8 -10 1090.11 98.2561   3
   1  -8 -10 1013.59 91.1762   2
   1   8  -9 9039.22 257.988   6
   1  -8  -9 9088.81 260.106   2
  -1  -8   9 8911.35 285.908   4
   1   8  -9 9012.14 264.482   3
   1  -8  -8 7483.00 225.521   2
  -1  -8   8 7686.73 258.135   4
   1   8  -8 7662.03 233.642   3
   1   8  -8 7454.35 227.335   6
   1   8  -7 14786.9 328.075   3
  -1   8   7 13627.0 305.233   2
  -1   8   7 14497.7 338.685   1
   1  -8  -7 13816.8 309.706   2
  -1  -8   7 14103.9 355.462   4
  -1   8   7 14120.7 320.768   5
  -1   8   6 22951.8 450.412   1
  -1  -8   6 23379.6 475.984   4
   1   8  -6 22141.4 430.580   1
   1  -8  -6 23007.0 412.293   2
  -1   8   6 23056.3 421.839   5
   1  -8  -6 22811.6 450.498   7
  -1   8   6 22602.2 404.497   2
   1   8  -6 23168.1 433.390   3
   1   8  -5 19842.0 394.532   1
   1  -8  -5 19895.1 359.394   2
  -1   8   5 19816.1 367.675   5
  -1  -8   5 20525.0 429.212   4
   1   8  -5 19998.0 377.695   5
   1   8  -5 20122.3 385.075   3
  -1   8   5 19720.2 404.447   1
   1  -8  -5 19948.0 407.663   7
  -1   8   5 18623.1 348.523   2
  -1   8   4 10381.8 219.639   2
   1  -8  -4 10105.3 267.357   7
  -1   8   4 10337.6 268.827   1
   1   8  -4 10536.1 265.787   1
  -1   8   4 10202.2 231.066   5
  -1  -8   4 10175.2 243.829   5
  -1  -8   4 10326.0 247.685   3
   1   8  -4 10144.3 242.077   5
   1  -8  -4 10074.9 222.514   2
  -1  -8   4 10374.7 267.838   7
   1   8  -4 10443.1 253.678   3
   1   8  -3 508.999 57.5316   5
   1  -8  -3 677.763 71.4191   7
  -1   8   3 642.325 53.3514   5
   1   8  -3 691.354 72.4012   1
  -1   8   3 663.692 73.0147   1
   1  -8  -3 618.691 49.7376   2
  -1  -8   3 639.848 59.1394   5
  -1   8   3 693.482 49.4496   2
  -1  -8   3 602.149 67.6209   7
  -1  -8   3 598.832 59.8252   3
  -1  -8   2 92.0769 35.1103   2
   1   8  -2 58.6695 44.1619   1
   1   8  -2 16.8705 32.4918   5
   1  -8  -2 61.4750 24.5392   2
  -1  -8   2 67.1959 36.2734   3
  -1   8   2 29.6729 39.8747   1
  -1   8   2 101.266 28.4328   5
   1  -8  -2 40.6791 36.3105   7
  -1  -8   2-8.13183 40.9162   7
  -1  -8   2 66.2739 30.6371   5
  -1   8   1 29.1531 23.1188   5
  -1  -8   1-20.6922 36.3689   7
   1   8  -1 61.8194 42.5581   1
   1  -8  -1-44.4588 42.3020   7
   1  -8  -1 8.08386 20.5709   2
  -1  -8   1 20.9605 29.4917   2
   1  -8  -1-9.32013 21.9001   3
   1   8  -1 33.0553 32.0708   5
  -1  -8   1-0.74938 27.8033   3
  -1   8   1 25.7751 40.7155   1
  -1  -8   1 66.1136 31.4497   5
  -1  -8   0 1699.14 105.732   7
   1   8   0 1594.04 85.9310   5
  -1   8   0 2003.03 113.095   1
  -1  -8   0 1547.47 89.3825   3
   1  -8   0 1661.45 103.459   7
   1  -8   0 1528.43 67.6876   2
   1  -8   0 1456.10 76.3975   3
   1  -8   0 1593.74 72.9993   5
  -1   8   0 1504.04 69.9971   5
  -1  -8   0 1663.40 87.0756   2
   1   8   0 1570.90 102.764   1
  -1  -8   0 1640.81 88.5601   5
   1   8   1 5132.32 158.756   5
   1  -8   1 4992.73 135.259   5
  -1   8  -1 4856.62 130.130   5
  -1  -8  -1 4957.48 164.466   3
  -1  -8  -1 5015.25 155.281   2
  -1  -8  -1 5019.74 178.528   7
   1  -8   1 5015.34 176.022   7
  -1  -8  -1 5225.04 163.476   5
  -1   8  -1 5131.24 178.439   1
   1  -8   1 4886.56 126.600   2
   1  -8   1 5171.03 139.019   3
   1   8   1 5092.40 181.047   1
   1   8   2 9069.37 226.640   5
  -1  -8  -2 9289.82 227.504   2
  -1  -8  -2 9362.24 253.691   7
   1  -8   2 9939.37 257.131   7
   1  -8   2 9254.37 200.780   3
   1  -8   2 9111.06 189.660   2
  -1   8  -2 9100.73 195.650   5
   1   8   2 9498.82 257.815   1
   1  -8   2 9515.89 199.448   5
   1   8   3 23805.6 418.903   2
   1   8   3 24341.9 466.800   1
  -1  -8  -3 24385.0 429.148   2
   1   8   3 23431.5 429.046   5
   1  -8   3 23242.0 452.432   7
  -1  -8  -3 24351.0 465.183   7
   1  -8   3 24377.3 388.109   5
   1  -8   3 25099.0 394.298   3
   1  -8   4 20370.9 351.116   3
  -1  -8  -4 20918.5 393.268   2
   1   8   4 20895.7 424.530   1
   1   8   4 19812.0 392.812   5
   1  -8   4 19768.2 347.749   5
  -1  -8  -4 21367.2 427.287   7
   1   8   4 20033.6 382.872   2
  -1   8  -4 20399.2 355.491   3
  -1   8  -5 20113.6 357.740   3
  -1  -8  -5 20005.6 396.526   2
   1  -8   5 19122.6 349.811   5
   1  -8   5 20143.0 355.542   3
   1   8   5 20060.1 400.548   5
  -1  -8  -6 4754.79 175.608   2
   1   8   6 4411.84 174.238   5
   1  -8   6 4354.58 147.286   5
   1  -8   6 4269.99 144.052   3
  -1   8  -6 4275.40 146.310   3
  -1   8  -7 18624.4 365.521   3
  -1   8  -7 18599.4 358.737   6
  -1  -8  -7 19245.7 407.784   2
   1  -8   7 18629.8 361.600   3
   1  -8   7 19004.4 419.705   4
   1   8   7 19887.4 418.708   5
   1  -8   8 6913.06 241.641   4
  -1   8  -8 7602.89 210.356   6
  -1  -8  -8 7350.50 242.000   2
   1   8   8 7694.93 252.239   5
  -1   8  -8 7225.62 213.326   3
   1   8   9 3372.50 171.741   5
  -1   8  -9 3227.77 145.609   3
  -1  -8  -9 3223.26 163.894   2
  -1   8  -9 3333.37 140.235   6
  -1   8 -10 5226.99 184.705   6
  -1   8 -10 5264.26 195.659   3
   1   8  10 5274.66 222.245   5
   1  -8  10 5122.32 214.364   4
  -1  -8 -10 5109.56 213.981   2
  -1  -8 -11 1104.64 110.581   2
  -1   8 -11 1122.51 97.9130   3
   1  -8  11 989.578 103.745   4
  -1   8 -12 11244.7 325.164   3
   1  -8  12 11512.7 344.992   4
  -1  -8 -12 11858.6 359.862   2
  -1  -8 -13 4978.74 236.586   2
  -1   8 -13 4932.51 216.693   3
   1  -8  13 5188.87 229.186   4
  -1  -8 -14 28954.3 645.056   2
  -1   8 -14 28648.6 609.513   3
   1  -8  14 27361.2 607.814   4
  -1  -8 -15 12996.2 418.173   3
  -1   8 -15 13004.2 398.875   3
   1  -8  15 12551.3 391.621   4
   1  -8  16 15115.3 444.795   4
  -1  -8 -16 15980.6 481.370   3
  -1   8 -16 15231.3 453.180   3
  -1  -8 -17 6213.90 300.782   3
   1  -8  17 6120.43 280.929   4
  -1   8 -17 6006.80 282.542   3
  -1  -8 -18 9987.34 395.537   3
  -1   8 -18 9823.23 379.118   3
   1  -8  18 10318.3 376.104   4
   1  -8  19 4685.15 261.117   4
  -1  -8 -19 5261.59 291.629   3
  -1   8 -19 5159.77 285.251   3
  -1  -8 -20 1087.05 148.294   3
  -1   8 -20 914.957 141.472   3
   1  -8  20 1166.60 144.179   4
   1  -8  21 866.523 128.722   4
  -1   8 -21 1015.47 158.046   3
  -1  -8 -21 976.049 141.986   3
  -1   8 -22 75.9760 84.5016   3
   1  -8  22 80.5408 73.5597   4
   1   9 -22-28.8538 80.7034   3
  -1  -9  22 83.8728 83.2997   4
  -1  -9  21 5280.61 305.265   4
   1  -9 -21 5561.83 313.957   3
   1   9 -21 4851.34 302.888   3
   1  -9 -20 139.659 77.1122   3
   1   9 -20-9.41179 75.5168   3
  -1  -9  20 62.1821 81.2404   4
  -1  -9  19 104.644 73.4156   4
   1   9 -19 9.86036 70.7527   3
   1  -9 -19 19.1798 75.7291   3
  -1  -9  18 350.328 90.2218   4
   1   9 -18 455.349 97.8735   3
   1  -9 -18 287.076 81.4970   3
   1  -9 -17 525.684 93.4980   3
  -1  -9  17 500.605 102.852   4
   1   9 -17 445.368 94.8645   3
  -1  -9  16-84.4950 67.8148   4
   1   9 -16 113.036 66.0191   3
   1  -9 -16 18.4099 69.1650   3
   1  -9 -15 7807.29 310.582   3
  -1  -9  15 7948.93 322.854   4
   1   9 -15 7888.16 307.521   3
   1   9 -14 15.0651 57.0779   3
  -1  -9  14 85.2527 57.5221   4
   1  -9 -14 143.727 61.3171   3
   1  -9 -13 22852.5 539.118   3
   1   9 -13 23429.7 536.880   3
  -1  -9  13 23536.1 563.191   4
   1   9 -13 24032.6 519.547   6
   1   9 -12 28.7521 43.8356   6
   1   9 -12 31.6438 49.3385   3
  -1  -9  12 49.7623 57.3600   4
  -1  -9  11 6373.49 262.084   4
   1  -9 -11 6994.79 249.993   2
   1   9 -11 6560.77 242.823   3
   1   9 -11 6936.68 240.303   6
   1   9 -10 80.7491 52.7154   3
   1   9 -10 85.3917 50.4886   6
  -1  -9  10 24.4808 56.3521   4
   1  -9 -10 176.213 44.7458   2
  -1   9  10 396.918 85.3466   5
   1  -9  -9 841.949 84.6044   2
  -1  -9   9 994.112 109.897   4
   1   9  -9 800.264 82.9866   6
   1   9  -9 882.543 88.7158   3
  -1   9   9 819.940 89.4635   5
  -1  -9   8 3028.56 169.042   4
   1   9  -8 3087.20 148.394   6
   1   9  -8 3155.03 149.894   3
  -1   9   8 2945.95 148.798   5
   1  -9  -8 2907.72 139.567   2
   1  -9  -7 258.754 60.3407   7
  -1  -9   7 318.974 67.8715   4
   1  -9  -7 351.824 54.8648   2
  -1   9   7 309.104 54.3860   5
  -1   9   7 373.974 67.7805   1
   1   9  -7 267.232 55.9976   1
   1   9  -7 390.090 61.1652   3
  -1  -9   6 551.094 84.3958   4
  -1   9   6 498.639 59.0505   5
   1   9  -6 424.769 66.9227   1
  -1   9   6 506.051 77.8631   1
   1  -9  -6 456.509 57.6873   2
  -1   9   6 457.281 53.7639   2
   1  -9  -6 566.655 79.4343   7
   1   9  -6 516.457 62.8438   3
   1   9  -5 51449.4 797.375   1
  -1   9   5 48376.0 720.266   2
  -1   9   5 50141.3 746.331   5
   1  -9  -5 52512.8 740.036   2
  -1   9   5 50003.0 806.388   1
   1   9  -5 50114.9 757.916   5
   1   9  -5 51637.7 775.342   3
   1  -9  -5 51425.6 810.110   7
  -1  -9   4 47.9722 47.2626   7
  -1   9   4 28.7192 32.9342   5
   1   9  -4 3.14769 35.6512   5
   1  -9  -4 64.5322 42.2307   7
   1  -9  -4 47.2278 26.6186   2
   1   9  -4 81.6153 51.0582   1
  -1   9   4 65.2806 31.0176   2
  -1   9   4-4.50126 47.6710   1
  -1   9   3 67863.7 1002.20   1
   1   9  -3 68783.1 997.869   1
  -1   9   3 68704.6 916.715   5
  -1  -9   3 67923.4 937.230   2
   1   9  -3 67187.9 941.538   5
   1  -9  -3 68060.7 998.667   7
   1  -9  -3 68202.4 906.192   2
  -1  -9   3 68116.6 1000.70   7
  -1   9   2 1397.57 102.675   1
  -1   9   2 1506.05 79.4212   5
   1  -9  -2 1472.47 103.775   7
   1  -9  -2 1473.36 84.5697   3
  -1  -9   2 1357.15 100.292   7
   1   9  -2 1346.55 100.939   1
   1   9  -2 1271.02 83.5938   5
   1  -9  -2 1423.69 73.8880   2
  -1  -9   2 1244.45 80.0650   2
   1  -9  -1 97113.2 1250.78   3
   1  -9  -1 97800.2 1333.58   7
   1   9  -1 96273.0 1269.70   5
   1   9  -1 97253.9 1336.71   1
   1  -9  -1 96567.7 1216.43   2
  -1  -9   1 96981.4 1266.96   2
  -1   9   1 100212. 1229.34   5
  -1   9   1 97668.8 1339.18   1
  -1  -9   1 97519.5 1333.78   7
   1  -9   0 7245.74 181.270   5
  -1   9   0 7661.26 234.831   1
  -1  -9   0 7379.81 231.278   7
   1  -9   0 7408.30 230.634   7
   1  -9   0 7409.87 171.111   2
   1   9   0 7293.37 201.344   5
  -1  -9   0 7373.42 200.175   2
  -1   9   0 7423.36 176.501   5
   1   9   0 7667.77 236.345   1
   1  -9   0 7208.79 185.461   3
   1  -9   1 55950.6 781.565   3
  -1  -9  -1 56613.4 814.883   2
  -1   9  -1 58753.0 771.643   5
   1  -9   1 58057.4 763.124   2
  -1   9  -1 57585.9 875.019   1
   1  -9   1 57120.7 776.779   5
   1  -9   1 56935.8 870.218   7
  -1  -9  -1 56885.4 871.371   7
   1   9   1 56670.3 820.633   5
   1   9   1 57170.6 880.116   1
  -1   9  -2 907.707 62.2964   5
  -1  -9  -2 883.688 70.9704   2
   1  -9   2 859.877 59.6302   3
   1   9   2 815.600 70.2486   5
   1  -9   2 885.086 83.4309   7
   1   9   2 810.464 82.6459   1
  -1   9  -2 909.652 87.8721   1
   1  -9   2 877.648 57.0166   2
   1  -9   2 944.131 61.8327   5
  -1  -9  -2 809.323 85.7936   7
   1  -9   3 17651.6 322.970   3
   1   9   3 17740.6 362.641   5
  -1  -9  -3 17460.9 394.028   7
   1  -9   3 17653.1 322.011   5
   1   9   3 17752.4 399.060   1
  -1  -9  -3 17757.9 358.898   2
   1  -9   3 17664.0 391.547   7
  -1  -9  -4 230.931 45.3978   2
  -1  -9  -4 244.368 58.6353   7
   1  -9   4 225.084 36.0410   5
   1   9   4 183.279 42.6845   5
   1   9   4 195.446 52.6416   1
   1  -9   4 240.625 35.3216   3
   1   9   5 2089.87 120.091   5
   1  -9   5 2206.58 101.285   3
  -1  -9  -5 1908.03 126.765   7
  -1  -9  -5 2136.84 117.128   2
  -1   9  -5 1988.18 99.0476   3
   1  -9   5 2032.25 98.0010   5
  -1  -9  -6 1321.66 97.4021   2
   1   9   6 1253.47 99.0505   5
   1  -9   6 1491.65 87.7597   3
  -1   9  -6 1419.21 89.0304   3
  -1   9  -7 11835.6 282.329   3
   1   9   7 12542.8 325.419   5
  -1  -9  -7 12360.7 319.969   2
  -1   9  -7 12250.1 282.255   6
  -1   9  -8 1015.60 81.3666   6
   1  -9   8 802.732 90.7158   4
  -1  -9  -8 852.388 87.9423   2
  -1   9  -8 906.016 79.0418   3
   1   9   8 959.733 98.6149   5
   1   9   9 11528.0 333.669   5
  -1   9  -9 11554.8 294.759   3
   1  -9   9 11039.3 331.827   4
  -1   9  -9 11061.2 279.425   6
  -1  -9  -9 11302.0 324.301   2
   1  -9  10 18.8665 58.4315   4
  -1   9 -10 37.0046 42.8893   3
   1   9  10 45.2520 61.4818   5
  -1   9 -10-14.4102 37.7678   6
  -1  -9 -10 52.1414 51.3533   2
  -1   9 -11 21307.5 461.274   3
  -1  -9 -11 20706.6 496.596   2
   1   9  11 21600.1 512.632   5
   1  -9  11 21890.2 508.349   4
   1  -9  12 177.565 67.0020   4
  -1   9 -12 250.964 64.9087   3
   1   9  12 85.8094 62.7889   5
  -1  -9 -12 94.4990 58.9669   2
   1  -9  13 6152.34 262.635   4
  -1  -9 -13 6243.30 270.738   2
   1   9  13 6625.63 283.421   5
  -1   9 -13 6321.08 248.279   3
  -1   9 -14 354.596 71.4782   3
  -1  -9 -14 309.301 78.3804   2
   1  -9  14 410.798 87.1398   4
  -1  -9 -15 1997.73 171.625   3
  -1   9 -15 1687.69 143.049   3
  -1  -9 -15 1728.09 156.949   2
   1  -9  15 1664.02 144.968   4
   1  -9  16 51.1986 58.4901   4
  -1  -9 -16 137.024 64.1210   3
  -1   9 -16 94.6873 58.3307   3
  -1   9 -17 1588.56 152.750   3
   1  -9  17 1453.41 147.705   4
  -1  -9 -17 1481.95 156.611   3
  -1   9 -18-60.0355 72.0946   3
   1  -9  18-55.8661 79.1076   4
  -1  -9 -18-36.0041 66.2432   3
   1  -9  19 11422.3 420.754   4
  -1   9 -19 10901.6 421.614   3
  -1  -9 -19 11231.1 440.491   3
  -1  -9 -20 862.249 138.767   3
  -1   9 -20 668.925 123.654   3
   1  -9  20 655.336 120.177   4
   1  -9  21 7050.01 341.248   4
  -1   9 -21 6724.38 350.797   3
   1  -9  22 268.213 99.4079   4
  -1 -10  21 5602.02 320.793   4
   1  10 -21 5405.32 320.552   3
  -1 -10  20 6625.26 340.717   4
   1  10 -20 6131.09 328.474   3
   1 -10 -20 6514.22 333.095   3
   1  10 -19 7112.05 343.248   3
  -1 -10  19 6874.85 340.470   4
   1 -10 -19 7432.06 349.841   3
   1 -10 -18 7244.15 338.694   3
  -1 -10  18 7281.68 341.836   4
   1  10 -18 7603.25 343.728   3
   1 -10 -17 13300.2 446.363   3
  -1 -10  17 12371.7 442.779   4
   1  10 -17 13172.9 444.056   3
   1 -10 -16 9595.25 365.074   3
  -1 -10  16 9735.28 377.978   4
   1  10 -16 9145.86 354.564   3
   1 -10 -15 3730.70 219.629   3
   1  10 -15 3333.82 205.464   3
  -1 -10  15 3235.43 214.249   4
   1 -10 -14 4454.13 230.787   3
  -1 -10  14 4125.47 234.452   4
   1  10 -14 4020.37 217.025   3
   1  10 -13 2864.18 177.565   3
  -1 -10  13 2672.54 184.877   4
   1  10 -13 2965.28 170.353   6
   1 -10 -13 3293.72 200.692   3
  -1  10  13 3133.38 190.247   5
   1 -10 -12 233.451 69.6207   2
   1  10 -12 244.541 64.2696   3
  -1 -10  12 126.022 66.7946   4
   1  10 -12 268.855 64.6687   6
  -1  10  12 275.041 72.9262   5
   1 -10 -11 273.791 66.3119   2
   1  10 -11 225.355 61.1960   3
  -1 -10  11 315.127 84.8802   4
  -1  10  11 95.6425 62.8961   5
   1  10 -11 162.235 58.6136   6
   1  10 -10 6806.39 240.375   6
  -1 -10  10 6550.40 269.411   4
   1  10 -10 6710.91 243.147   3
   1 -10 -10 6619.87 238.945   2
  -1  10  10 6665.64 247.005   5
  -1  10   9 5137.95 208.733   5
   1  10  -9 5462.08 210.150   6
   1  10  -9 5428.49 210.614   1
  -1 -10   9 5634.96 242.159   4
   1 -10  -9 5401.55 205.927   2
   1  10  -9 5398.45 211.197   3
   1 -10  -8 18089.8 393.474   2
   1  10  -8 18794.4 412.003   3
   1  10  -8 17418.6 408.197   1
   1 -10  -8 18147.8 433.840   7
  -1  10   8 18187.5 404.665   5
  -1 -10   8 18239.4 455.559   4
  -1  10   7 18543.8 395.600   5
   1  10  -7 19032.9 407.689   3
   1 -10  -7 18393.1 384.737   2
  -1  10   7 18360.2 433.543   1
   1  10  -7 18058.3 413.553   1
   1 -10  -7 18708.6 436.464   7
  -1  10   6 27374.5 551.030   1
   1  10  -6 28847.3 526.046   3
   1  10  -6 26887.3 531.743   1
   1 -10  -6 28057.9 553.728   7
  -1  10   6 27049.8 497.691   5
   1 -10  -6 27136.4 485.337   2
   1  10  -5 11095.3 277.788   5
  -1  10   5 10800.7 266.685   5
  -1  10   5 11133.2 316.756   1
  -1  10   5 11016.2 255.400   2
   1  10  -5 11173.2 307.941   1
   1 -10  -5 12007.3 323.917   7
   1 -10  -5 11578.6 265.781   2
  -1  10   4 7123.86 200.295   5
   1 -10  -4 7419.39 246.777   7
  -1 -10   4 7159.14 243.382   7
  -1 -10   4 7066.89 208.193   2
   1 -10  -4 7413.12 196.538   2
  -1  10   4 7643.54 252.662   1
   1  10  -4 7026.07 210.624   5
   1  10  -4 6784.62 234.463   1
  -1 -10   3 6575.49 196.621   2
   1  10  -3 6984.07 236.207   1
   1  10  -3 6678.19 200.071   5
  -1 -10   3 6740.27 232.331   7
  -1  10   3 6740.01 186.015   5
  -1  10   3 6524.73 232.223   1
   1 -10  -3 6801.32 181.132   2
   1 -10  -3 6727.37 232.490   7
  -1  10   2 518.450 51.0628   5
   1 -10  -2 424.636 51.8002   3
   1  10  -2 475.268 58.2393   5
   1 -10  -2 522.175 75.9471   7
  -1 -10   2 544.407 58.5560   2
   1 -10  -2 465.278 47.4862   2
  -1  10   2 560.624 75.5432   1
  -1 -10   2 444.131 69.2660   7
   1  10  -2 537.137 74.0825   1
   1  10  -1 91.8109 44.9179   5
  -1 -10   1-5.53866 36.5911   2
  -1 -10   1 100.193 54.4163   7
   1 -10  -1 43.0260 46.7210   7
   1 -10  -1 45.9029 26.8345   3
   1  10  -1 123.943 52.8640   1
   1 -10  -1 71.1998 27.0087   2
  -1  10   1 99.6425 55.9304   1
  -1  10   1 52.7834 29.7792   5
  -1  10   0 112.956 52.6897   1
   1 -10   0 84.3078 49.2393   7
  -1 -10   0 59.9521 35.4795   2
   1 -10   0 181.553 35.6321   5
   1 -10   0 140.056 32.3137   2
   1  10   0 103.561 52.2845   1
  -1  10   0 121.376 31.1940   5
   1 -10   0 211.213 37.7898   3
  -1 -10   0 103.874 49.8336   7
   1  10   0 53.4431 34.3849   5
   1  10   1 2540.32 144.984   1
  -1  10  -1 2426.16 101.088   5
  -1 -10  -1 2212.36 133.265   7
   1 -10   1 2209.78 98.9572   5
   1  10   1 2339.66 117.564   5
   1 -10   1 2205.23 101.658   3
   1 -10   1 2077.71 130.450   7
  -1 -10  -1 2263.47 112.208   2
   1 -10   1 2201.57 92.8024   2
  -1  10  -1 2420.98 141.346   1
   1 -10   2 9250.62 219.008   5
  -1  10  -2 9418.46 281.673   1
   1  10   2 9767.77 289.867   1
  -1 -10  -2 9596.01 247.452   2
   1  10   2 9484.41 250.358   5
   1 -10   2 9167.29 220.441   3
   1 -10   2 9642.13 212.455   2
  -1  10  -2 9216.98 214.029   5
  -1 -10  -2 9679.23 285.841   7
   1 -10   2 9057.33 276.136   7
  -1 -10  -3 18034.0 372.560   2
   1 -10   3 17459.8 322.663   2
   1 -10   3 18459.0 415.629   7
  -1 -10  -3 18015.7 417.036   7
   1  10   3 17762.0 373.458   5
   1  10   3 17943.6 419.835   1
   1 -10   3 17519.7 335.054   3
  -1  10  -3 17737.8 408.607   1
   1 -10   3 17708.2 334.802   5
  -1 -10  -4 37318.9 668.764   7
   1 -10   4 36349.5 566.356   3
   1  10   4 36763.1 668.655   1
  -1 -10  -4 36271.3 612.799   2
   1 -10   4 35717.7 562.631   5
   1  10   4 35972.5 616.338   5
  -1 -10  -5 11184.6 321.202   7
  -1 -10  -5 10263.1 281.199   2
   1 -10   5 10936.3 254.598   3
   1  10   5 10781.6 291.104   5
  -1 -10  -6 15618.4 398.850   7
  -1  10  -6 16140.0 338.046   3
  -1 -10  -6 15665.6 369.258   2
   1  10   6 16211.0 379.334   5
  -1  10  -7 5618.71 187.983   6
   1  10   7 5567.94 215.165   5
  -1  10  -7 5879.74 193.422   3
  -1 -10  -7 5685.38 213.579   2
  -1  10  -8 9853.11 266.742   3
   1  10   8 9840.52 302.972   5
  -1  10  -8 9864.11 262.641   6
  -1 -10  -8 9951.77 299.321   2
   1  10   9 814.146 98.9637   5
  -1  10  -9 836.552 77.5748   6
  -1  10  -9 867.523 83.9132   3
  -1 -10  -9 708.967 84.4522   2
  -1  10 -10 421.508 61.3080   6
   1 -10  10 442.237 84.6627   4
   1  10  10 306.817 73.7158   5
  -1  10 -10 431.716 70.6458   3
  -1 -10 -10 331.330 73.4748   2
   1 -10  11 420.160 88.8131   4
  -1  10 -11 459.176 71.5640   3
   1  10  11 426.652 88.0369   5
  -1 -10 -11 408.844 79.6239   2
  -1  10 -11 473.541 68.8288   6
   1  10  12 6283.95 274.986   5
   1 -10  12 5866.01 263.019   4
  -1 -10 -12 5479.35 251.629   2
  -1  10 -12 6178.80 241.390   3
   1 -10  13 2855.54 188.427   4
  -1  10 -13 2958.71 173.653   3
   1  10  13 2734.65 190.969   5
  -1 -10 -13 2742.55 184.237   2
   1  10  14 8714.82 348.146   5
   1 -10  14 8403.75 328.712   4
  -1 -10 -14 8755.40 340.576   2
  -1  10 -14 8305.03 306.191   3
  -1  10 -15 12848.6 405.165   3
  -1 -10 -15 13154.1 434.260   2
   1  10  15 13929.7 459.095   5
   1 -10  15 13258.2 431.078   4
   1  10  16 10241.0 401.618   5
   1 -10  16 9390.20 366.518   4
  -1  10 -16 8888.32 345.290   3
  -1 -10 -16 9818.67 384.049   3
  -1  10 -17 10952.8 395.975   3
   1 -10  17 10541.2 399.040   4
  -1 -10 -17 10726.4 416.217   3
   1  10  17 11251.1 434.088   5
  -1  10 -18 10250.7 398.688   3
   1  10  18 10641.2 436.359   5
  -1 -10 -18 10473.9 418.564   3
   1 -10  18 9652.43 389.866   4
   1  10  19 3756.61 263.237   5
  -1 -10 -19 3839.15 261.008   3
  -1  10 -19 3196.80 233.451   3
   1 -10  19 3458.94 240.691   4
   1 -10  20 1159.88 154.909   4
   1  10  20 1270.91 186.786   5
  -1 -10 -20 1214.21 156.437   3
   1 -10  21 214.890 90.4163   4
  -1  11  20 1031.58 156.301   5
   1 -11 -20 1295.21 177.933   3
   1  11 -20 1127.97 164.818   3
  -1 -11  20 1083.35 154.994   4
   1 -11 -19 271.307 101.251   3
   1  11 -19 382.789 105.632   3
  -1 -11  19 325.785 91.9418   4
   1  11 -18 713.171 119.160   3
  -1  11  18 441.031 115.489   5
   1 -11 -18 245.013 87.9064   3
  -1 -11  18 461.617 118.767   4
   1 -11 -17 7.52146 62.6782   3
  -1  11  17-91.6189 93.7016   5
  -1 -11  17 35.9487 81.1790   4
   1  11 -17 60.1392 56.0722   1
   1  11 -17 38.8765 69.0316   3
  -1 -11  16 3574.10 239.803   4
   1 -11 -16 3690.05 231.643   3
   1  11 -16 3653.08 198.840   1
  -1  11  16 3694.64 237.683   5
   1  11 -16 3787.43 227.704   3
   1  11 -15 545.907 100.140   3
  -1  11  15 546.076 109.135   5
   1 -11 -15 427.628 89.4097   3
  -1 -11  15 361.365 114.893   4
   1  11 -15 398.216 77.4642   1
  -1  11  14 13560.4 432.821   5
  -1 -11  14 13900.5 453.577   4
   1  11 -14 13086.6 378.511   1
   1 -11 -14 13625.0 424.880   3
   1  11 -14 13208.8 411.996   3
   1  11 -14 13878.8 399.666   6
   1  11 -13 1703.25 136.077   6
   1  11 -13 1487.71 131.342   3
   1  11 -13 1765.46 129.638   1
  -1  11  13 1467.20 141.448   5
   1 -11 -13 1604.52 143.988   3
  -1 -11  13 1819.67 163.305   4
   1  11 -12 18548.6 448.767   1
   1  11 -12 18035.7 448.333   6
  -1  11  12 18352.8 477.350   5
   1 -11 -12 18302.0 460.320   2
  -1 -11  12 18416.1 510.939   4
   1  11 -12 18106.7 462.629   3
   1  11 -11 799.304 91.3033   1
   1  11 -11 831.536 96.5241   6
   1  11 -11 787.282 92.6618   3
  -1  11  11 782.653 97.6373   5
   1 -11 -11 748.826 90.4299   2
  -1 -11  11 757.014 114.776   4
   1  11 -10 4043.40 188.604   6
   1 -11 -10 3703.53 198.608   7
   1  11 -10 3842.46 187.119   1
   1  11 -10 3752.58 186.030   3
  -1 -11  10 3796.84 212.212   4
  -1  11  10 4122.91 194.370   5
   1 -11 -10 3731.65 180.443   2
   1 -11  -9 288.408 67.4842   7
   1  11  -9 479.824 72.7457   1
  -1  11   9 273.824 63.2503   5
   1  11  -9 295.592 62.2733   3
   1 -11  -9 417.257 64.9344   2
   1  11  -9 407.005 71.0731   6
   1  11  -8 509.553 77.3241   1
   1 -11  -8 429.970 83.9305   7
   1 -11  -8 376.892 63.0533   2
   1  11  -8 522.009 74.5743   3
  -1  11   8 427.022 70.4659   5
   1 -11  -7 2683.62 136.562   2
  -1  11   7 2801.57 167.745   1
  -1  11   7 2692.28 140.836   5
   1  11  -7 2917.60 153.074   3
   1  11  -7 2904.95 160.534   1
   1 -11  -7 2622.25 161.432   7
  -1  11   6 10124.1 272.434   5
  -1  11   6 10265.6 319.484   1
   1 -11  -6 9869.67 313.982   7
   1  11  -6 10330.8 309.486   1
   1 -11  -6 10462.6 267.538   2
  -1  11   5-6.72659 52.3430   1
   1 -11  -5 18.3279 30.4529   2
   1  11  -5 5.20798 38.6737   5
   1  11  -5-20.8192 48.3273   1
  -1 -11   5-16.9433 35.2477   2
   1 -11  -5-19.5276 47.6755   7
  -1  11   5 6.36223 41.4196   5
  -1  11   4 20524.7 467.086   1
   1 -11  -4 20573.7 382.179   2
  -1 -11   4 19287.1 454.185   7
   1  11  -4 19920.7 407.875   5
  -1 -11   4 20391.4 403.680   2
   1 -11  -4 20140.7 462.178   7
  -1  11   4 20006.0 388.791   5
   1  11  -4 20199.8 456.863   1
  -1 -11   3 275.325 69.5973   7
   1  11  -3 201.215 49.6239   5
  -1  11   3 276.290 46.6312   5
  -1 -11   3 229.824 44.4908   2
   1  11  -3 266.099 67.9233   1
  -1  11   3 250.504 65.0142   1
   1 -11  -3 203.279 67.4197   7
   1 -11  -3 161.399 34.5776   2
   1  11  -2 46894.9 731.496   5
  -1  11   2 47480.8 696.451   5
   1 -11  -2 47640.4 687.777   2
  -1 -11   2 47259.0 729.651   2
   1 -11  -2 46982.8 805.550   7
  -1 -11   2 48061.8 809.439   7
  -1  11   2 47456.9 812.770   1
   1  11  -2 48326.5 810.973   1
   1 -11  -1 482.449 76.9789   7
   1  11  -1 420.923 59.7902   5
   1  11  -1 384.929 75.1563   1
  -1  11   1 385.945 50.2484   5
  -1  11   1 599.130 85.5112   1
  -1 -11   1 391.724 56.7193   2
   1 -11  -1 376.389 44.5499   2
  -1 -11   1 410.891 76.4011   7
   1  11   0 27906.3 502.323   5
   1  11   0 27860.3 566.766   1
  -1  11   0 28602.9 462.628   5
  -1 -11   0 28200.8 567.814   7
   1 -11   0 28577.8 453.833   2
  -1  11   0 28390.2 568.695   1
   1 -11   0 27809.5 560.549   7
   1 -11   0 27332.2 476.576   3
  -1 -11   0 28270.9 502.037   2
   1 -11   1 723.492 57.9630   2
   1 -11   1 626.951 59.2687   3
  -1  11  -1 673.212 61.2123   5
   1 -11   1 796.209 71.2448   5
  -1 -11  -1 750.949 70.0915   2
  -1 -11  -1 759.973 94.7120   7
   1 -11   1 741.638 89.7740   7
   1  11   1 759.094 74.6829   5
   1  11   1 923.286 101.696   1
  -1  11  -1 761.663 91.7452   1
   1 -11   2 8958.17 223.704   5
  -1 -11  -2 9272.24 254.347   2
  -1 -11  -2 9228.33 294.844   7
  -1  11  -2 9197.89 291.656   1
  -1  11  -2 8969.99 218.589   5
   1 -11   2 9104.47 290.884   7
   1  11   2 9438.93 300.559   1
   1 -11   2 9324.42 216.468   2
   1 -11   2 8940.99 225.937   3
   1  11   2 8834.94 251.056   5
   1 -11   3 21.4668 31.7429   3
  -1  11  -3 72.8040 51.7865   1
  -1 -11  -3 121.667 75.0126   7
  -1 -11  -3-7.53685 33.9810   2
   1 -11   3 122.945 37.3803   2
   1 -11   3 19.9602 27.9613   5
   1 -11   3 149.701 62.4785   7
   1  11   3 32.9813 38.5494   5
   1  11   3-4.58299 55.4205   1
   1  11   4 804.255 83.4966   5
  -1 -11  -4 821.429 81.4529   2
  -1 -11  -4 865.564 97.2238   7
  -1  11  -4 871.949 94.0097   1
   1  11   4 862.149 100.241   1
   1 -11   4 833.267 65.7010   2
  -1 -11  -5 1276.55 112.667   7
  -1  11  -5 1504.64 121.460   1
  -1 -11  -5 1271.19 97.1715   2
   1  11   5 1374.41 105.666   5
   1  11   6 8233.58 263.859   5
  -1 -11  -6 7723.83 252.140   2
  -1 -11  -6 7626.48 278.684   7
  -1 -11  -7 1649.38 119.171   2
   1  11   7 1867.59 127.425   5
  -1  11  -7 1713.82 110.319   6
  -1 -11  -7 1918.22 144.543   7
  -1  11  -7 1822.97 109.773   3
  -1 -11  -8 28969.0 616.574   7
   1  11   8 28845.7 587.415   5
  -1 -11  -8 28313.8 578.204   2
  -1  11  -8 28771.4 530.499   6
  -1  11  -8 28798.5 535.621   3
  -1  11  -9 989.056 88.8997   3
  -1 -11  -9 1119.63 105.688   2
   1  11   9 940.668 105.716   5
  -1  11  -9 932.139 87.6579   6
   1  11  10 24632.0 561.558   5
  -1 -11 -10 24754.5 555.153   2
  -1  11 -10 25071.7 496.824   6
  -1  11 -10 25205.0 512.681   3
   1  11  11 3467.73 201.795   5
  -1 -11 -11 3874.99 205.287   2
  -1  11 -11 3480.89 175.047   3
  -1  11 -11 3532.10 167.110   6
  -1  11 -12 14871.4 397.102   3
  -1 -11 -12 14978.5 437.440   2
   1  11  12 14983.3 445.155   5
   1  11  13 1759.36 161.767   5
  -1  11 -13 1548.33 130.739   3
   1 -11  13 1672.10 154.989   4
  -1 -11 -13 1554.15 140.387   2
   1  11  14 2925.38 214.201   5
   1 -11  14 2177.93 178.936   4
  -1 -11 -14 2150.67 172.543   2
  -1  11 -14 2427.96 167.527   3
   1 -11  15 375.876 96.8678   4
  -1 -11 -15 492.068 100.382   2
  -1  11 -15 500.953 87.1430   3
   1  11  15 563.172 122.083   5
  -1  11 -16 177.432 63.9654   3
   1  11  16 303.858 105.266   5
  -1 -11 -16 283.766 86.3858   3
   1 -11  16 252.768 98.3671   4
  -1 -11 -17 54.9326 82.2613   3
   1  11  17 19.6204 90.4328   5
   1 -11  17 86.6861 89.7754   4
   1 -11  18 2849.80 222.097   4
  -1 -11 -18 3351.61 240.496   3
   1  11  18 3441.86 253.387   5
   1  11  19 156.553 109.561   5
   1 -11  19 177.869 78.8216   4
  -1 -11 -19 136.394 76.9656   3
   1 -11  20 5892.28 324.212   4
  -1  12  20 3740.53 276.257   5
  -1 -12  19 4592.99 293.150   4
  -1  12  19 5101.99 316.842   5
   1 -12 -19 4495.02 280.685   3
   1 -12 -18 10623.0 427.217   3
   1  12 -18 10343.7 418.406   3
  -1  12  18 10342.3 435.291   5
  -1 -12  18 10227.8 435.785   4
   1 -12 -17 4629.32 270.434   3
  -1  12  17 4672.61 280.774   5
   1  12 -17 4368.68 260.599   3
  -1 -12  17 3942.22 269.241   4
   1 -12 -16 6658.13 312.612   3
   1  12 -16 6488.67 307.731   3
   1  12 -16 6847.19 280.055   1
  -1 -12  16 6897.94 339.910   4
  -1 -12  15 318.127 96.3878   4
   1  12 -15 569.731 93.8547   1
   1 -12 -15 640.593 112.809   3
   1  12 -15 533.467 100.442   3
  -1  12  15 356.266 98.2970   5
   1  12 -14 1765.73 143.673   1
   1  12 -14 1721.84 147.891   3
   1  12 -14 1924.54 153.413   6
   1 -12 -14 1969.14 162.347   3
  -1  12  14 1671.64 156.885   5
  -1 -12  14 1994.45 181.030   4
   1  12 -13 367.229 83.1586   3
   1  12 -13 240.895 61.1850   6
   1 -12 -13 396.917 96.2979   7
  -1 -12  13 185.789 84.3650   4
   1  12 -13 195.504 67.8456   1
  -1  12  13 373.624 93.7311   5
   1 -12 -13 483.706 93.8598   3
   1  12 -12 1338.26 125.675   1
  -1 -12  12 1360.42 146.684   4
   1 -12 -12 1466.74 138.893   7
   1  12 -12 1405.55 129.722   3
   1  12 -12 1501.37 129.833   6
  -1  12  12 1434.39 133.242   5
   1 -12 -11 4480.17 207.692   2
   1 -12 -11 4376.52 232.121   7
   1  12 -11 4604.23 214.646   6
   1  12 -11 4491.78 215.391   3
  -1  12  11 4338.09 215.568   5
   1  12 -11 4318.43 211.840   1
   1  12 -10 724.519 90.7299   6
  -1  12  10 773.257 95.7126   5
   1  12 -10 700.514 93.8168   1
   1 -12 -10 620.395 87.4848   2
   1  12 -10 724.354 90.9855   3
   1 -12 -10 862.749 110.129   7
   1  12  -9 13559.2 368.497   6
   1 -12  -9 13708.7 405.122   7
  -1  12   9 13275.1 363.394   5
   1  12  -9 13887.6 375.262   3
   1 -12  -9 13456.8 352.266   2
   1  12  -9 13574.9 383.073   1
   1  12  -8 4218.35 204.542   1
   1 -12  -8 4301.82 217.590   7
   1  12  -8 4376.47 198.533   3
  -1  12   8 4277.58 189.414   5
   1 -12  -8 4417.72 184.948   2
   1 -12  -7 25245.4 486.512   2
  -1  12   7 24292.3 492.903   5
   1  12  -7 25000.6 547.006   1
   1 -12  -7 25308.9 568.207   7
  -1  12   7 24325.7 560.474   1
  -1  12   6 5570.56 200.169   5
   1  12  -6 4949.75 220.265   1
  -1 -12   6 5336.40 198.944   2
   1 -12  -6 4702.04 179.097   2
   1 -12  -6 5545.97 239.217   7
  -1  12   6 5318.59 237.027   1
  -1  12   5 13733.1 323.568   5
   1 -12  -5 14474.2 395.651   7
   1  12  -5 14128.9 385.130   1
  -1 -12   5 13630.6 330.856   2
  -1  12   5 14355.3 398.937   1
   1 -12  -5 13782.8 315.659   2
   1  12  -4 1282.16 96.7480   5
  -1  12   4 1647.74 100.979   5
   1  12  -4 1727.75 131.113   1
  -1 -12   4 1601.36 132.352   7
   1 -12  -4 1447.96 89.9972   2
  -1  12   4 1391.62 123.235   1
  -1 -12   4 1493.23 102.154   2
   1 -12  -4 1717.61 136.507   7
   1  12  -3 310.533 67.8544   1
  -1 -12   3 339.409 55.8358   2
   1 -12  -3 376.157 76.3495   7
  -1  12   3 436.907 79.4784   1
  -1 -12   3 396.202 80.3159   7
   1 -12  -3 395.357 56.0558   2
  -1  12   3 446.681 59.3139   5
   1  12  -3 405.510 63.5380   5
   1  12  -2 1702.66 133.535   1
  -1 -12   2 1932.11 138.272   7
   1 -12  -2 1818.87 138.538   7
  -1 -12   2 1730.93 106.401   2
  -1  12   2 1889.42 142.590   1
   1 -12  -2 1679.88 90.3589   2
  -1  12   2 1653.52 95.5522   5
   1  12  -2 1627.04 104.857   5
  -1 -12   1 3561.32 186.243   7
   1 -12  -1 3349.65 126.941   2
  -1 -12   1 3452.50 150.283   2
  -1  12   1 3276.57 132.917   5
   1  12  -1 3553.97 153.987   5
   1 -12  -1 3320.01 181.307   7
   1  12  -1 3628.11 189.540   1
  -1  12   1 3281.48 183.770   1
   1 -12   0 2.29873 53.3124   7
   1  12   0 91.7572 44.7254   5
  -1 -12   0 76.6535 56.8939   7
  -1  12   0 59.1310 38.3395   5
  -1 -12   0 26.4056 35.5901   2
   1 -12   0 39.0429 31.0960   2
  -1  12   0 147.120 69.9403   1
   1  12   0 85.6547 55.1169   1
   1 -12   1 11771.5 346.829   7
   1  12   1 10951.9 291.043   5
   1 -12   1 11546.9 254.284   2
  -1 -12  -1 11299.1 293.852   2
  -1 -12  -1 11936.3 349.356   7
   1  12   1 11633.3 351.366   1
  -1  12  -1 11854.2 349.966   1
  -1  12  -1 11623.4 263.237   5
   1 -12   2 862.996 66.6816   2
   1  12   2 990.545 89.6230   5
  -1 -12  -2 1038.21 108.037   7
   1 -12   2 990.113 111.032   7
  -1  12  -2 1114.18 113.399   1
   1  12   2 1154.99 114.266   1
  -1  12  -2 874.391 69.3703   5
  -1 -12  -2 974.463 85.7136   2
  -1 -12  -3 23262.7 525.363   7
   1  12   3 22935.4 529.419   1
  -1  12  -3 22826.4 517.125   1
  -1 -12  -3 22618.6 458.926   2
   1 -12   3 22475.3 405.243   2
   1  12   3 22821.3 465.257   5
  -1  12  -4 3242.66 180.474   1
   1 -12   4 3178.82 128.847   2
   1  12   4 3387.54 163.294   5
  -1 -12  -4 3236.58 184.669   7
  -1 -12  -4 3394.20 159.710   2
   1  12   4 3289.52 186.718   1
   1 -12   5 27284.0 479.270   2
  -1 -12  -5 27430.4 539.579   2
   1  12   5 27420.2 542.218   5
  -1 -12  -5 27789.2 599.646   7
  -1  12  -5 27451.5 583.371   1
   1  12   6 1023.51 100.863   5
  -1  12  -6 949.219 106.866   1
  -1 -12  -6 882.548 108.101   7
  -1 -12  -6 895.883 88.8665   2
  -1  12  -7 9154.60 266.038   6
  -1  12  -7 8789.62 305.391   1
   1  12   7 9090.82 294.533   5
  -1 -12  -7 9169.31 324.815   7
  -1 -12  -7 8841.00 286.688   2
  -1 -12  -8 6.30157 55.8923   7
  -1  12  -8-4.30068 39.5908   6
  -1 -12  -8 43.0280 48.5878   2
   1  12   8-36.6304 55.6962   5
  -1  12  -8-31.1754 42.5948   3
  -1  12  -9 580.906 78.8894   6
  -1 -12  -9 608.925 101.264   7
   1  12   9 615.549 93.6747   5
  -1 -12  -9 652.547 87.5701   2
  -1  12  -9 625.615 74.5158   3
  -1  12 -10 3482.33 167.877   6
  -1 -12 -10 3536.62 194.129   2
  -1 -12 -10 3311.98 204.757   7
  -1  12 -10 3547.95 173.349   3
   1  12  10 2973.10 185.214   5
   1  12  11 1299.40 133.436   5
  -1  12 -11 1374.45 112.125   6
  -1  12 -11 1495.27 118.580   3
  -1 -12 -11 1316.81 129.819   2
   1  12  12 4536.41 244.984   5
  -1  12 -12 5099.99 221.999   3
  -1 -12 -12 4855.39 244.005   2
  -1 -12 -13 6167.34 283.365   2
  -1  12 -13 6225.75 261.142   3
   1  12  13 6072.67 292.344   5
   1  12  14 8326.98 353.633   5
  -1 -12 -14 8498.14 345.099   2
  -1 -12 -15 8284.50 351.600   2
   1  12  15 8368.84 365.216   5
  -1 -12 -16 9002.68 385.323   3
   1  12  17 6160.24 335.518   5
  -1 -12 -17 6675.94 338.843   3
   1  12  18 4198.04 289.227   5
  -1 -12 -18 4438.95 281.996   3
   1  12  19 413.693 127.488   5
  -1  13  19 286.239 119.686   5
   1 -13 -18-40.8360 78.5492   3
  -1  13  17 1405.27 172.090   5
  -1 -13  17 1156.32 159.272   4
   1 -13 -17 1095.57 145.751   7
   1 -13 -17 1364.06 159.039   3
   1 -13 -16 455.435 98.1073   3
   1  13 -16 412.297 83.9190   1
  -1  13  16 455.903 108.442   5
  -1  13  15 5154.58 279.042   5
   1  13 -15 5355.04 257.317   1
   1 -13 -15 5728.82 289.930   3
   1  13 -15 5620.88 278.572   3
   1 -13 -15 6087.36 302.621   7
   1  13 -14 5208.42 248.203   6
   1 -13 -14 4882.08 259.668   3
   1  13 -14 4879.65 242.363   1
   1 -13 -14 4900.00 271.026   7
  -1  13  14 4822.54 257.657   5
   1  13 -14 5048.59 254.815   3
   1 -13 -13 14474.1 469.659   3
   1  13 -13 15593.2 446.831   1
   1 -13 -13 15762.5 483.616   7
   1  13 -13 16147.5 442.527   6
   1  13 -13 16231.9 461.297   3
  -1  13  13 15008.5 452.736   5
   1 -13 -12 5732.65 279.199   7
  -1  13  12 5894.19 264.740   5
   1  13 -12 5815.36 261.723   1
   1  13 -12 6059.63 266.688   3
   1  13 -11 15872.5 443.865   1
   1 -13 -11 16280.2 477.055   7
  -1  13  11 16078.1 438.865   5
   1  13 -11 16869.7 441.560   6
   1 -13 -11 15904.1 421.149   2
   1  13 -11 16211.9 441.684   3
  -1  13  10 3857.20 199.243   5
   1 -13 -10 3740.31 216.826   7
   1 -13 -10 3831.33 187.214   2
   1  13 -10 3778.37 194.704   6
   1  13 -10 3706.01 204.937   1
   1  13 -10 3833.19 202.036   3
  -1  13   9 3776.52 187.724   5
   1  13  -9 3479.23 188.189   6
   1 -13  -9 4131.50 223.580   7
   1  13  -9 3929.56 207.840   1
   1 -13  -9 3697.02 179.334   2
   1 -13  -8 2206.43 167.648   7
   1  13  -8 2136.39 155.783   1
  -1  13   8 2015.27 137.226   5
   1 -13  -8 2441.32 140.584   2
   1 -13  -7 44.7441 45.4775   2
   1  13  -7 2.74165 52.6146   1
  -1 -13   7-7.01884 37.7253   2
  -1  13   7-14.2863 44.3563   5
   1 -13  -7-58.4106 60.7111   7
  -1  13   7 41.5238 59.6173   1
  -1  13   6 933.602 89.0503   5
   1  13  -6 1055.72 110.062   1
  -1  13   6 1146.47 120.871   1
   1 -13  -6 1113.27 120.448   7
   1 -13  -6 990.846 84.6894   2
  -1 -13   6 999.508 91.4832   2
   1 -13  -5 2085.04 117.861   2
   1  13  -5 2107.38 154.080   1
   1 -13  -5 2433.39 166.625   7
  -1  13   5 2205.34 125.939   5
  -1 -13   5 2334.49 132.406   2
  -1  13   5 2463.85 171.884   1
   1  13  -4 279.940 59.6999   5
  -1 -13   4 174.771 72.9886   7
  -1 -13   4 200.076 49.2134   2
   1 -13  -4 179.236 63.9635   7
  -1  13   4 274.031 77.3490   1
   1 -13  -4 198.225 43.1248   2
   1  13  -4 322.665 81.9284   1
  -1  13   4 258.710 55.4398   5
   1  13  -3 14699.4 353.993   5
  -1  13   3 14582.0 325.685   5
   1  13  -3 15099.0 416.607   1
   1 -13  -3 14519.2 314.607   2
  -1 -13   3 15131.0 353.030   2
   1 -13  -3 14886.8 416.055   7
  -1  13   3 14856.6 420.282   1
  -1 -13   3 14085.1 407.557   7
  -1  13   2 45.9533 55.4376   1
   1 -13  -2 32.2706 58.7859   7
  -1 -13   2 40.4982 65.1225   7
   1  13  -2 69.4929 53.3608   1
  -1 -13   2 141.447 47.4680   2
   1 -13  -2 15.6183 30.8794   2
   1  13  -2 78.6290 41.8835   5
  -1  13   2 52.0660 42.2457   5
   1 -13  -1 22950.7 531.806   7
  -1 -13   1 21775.8 522.916   7
   1  13  -1 21305.4 519.317   1
  -1 -13   1 21815.3 444.687   2
  -1  13   1 22415.2 530.378   1
   1  13  -1 21885.9 448.892   5
   1 -13  -1 22047.3 399.330   2
  -1  13   1 21721.6 411.235   5
   1 -13   0 108.965 69.9345   7
  -1  13   0 77.1140 39.4552   5
   1 -13   0 85.2167 35.7486   2
   1  13   0 49.8528 43.4880   5
  -1 -13   0 37.5252 36.4869   2
   1  13   0 61.1216 64.3761   1
  -1 -13   0-56.8080 64.1322   7
  -1  13   0 45.8476 54.3461   1
  -1  13  -1 9381.53 326.295   1
  -1 -13  -1 10141.7 335.770   7
  -1  13  -1 9672.45 244.421   5
   1 -13   1 9789.55 237.218   2
  -1 -13  -1 10433.0 285.452   2
   1 -13   1 10410.0 337.670   7
   1  13   1 9753.42 280.501   5
   1  13   1 10051.3 338.887   1
  -1  13  -2 10.9376 56.4267   1
   1 -13   2 28.4132 32.3740   2
  -1 -13  -2 60.4049 42.6223   2
  -1 -13  -2 37.0730 54.8285   7
  -1  13  -2-18.9944 36.0991   5
   1 -13   2 2.12698 56.2360   7
   1  13   2-8.97537 40.7085   5
   1  13   2 68.1688 55.1441   1
   1  13   3 1425.13 108.945   5
   1 -13   3 1197.89 79.9025   2
  -1 -13  -3 1555.16 137.587   7
  -1  13  -3 1564.83 136.252   1
   1  13   3 1475.93 135.557   1
  -1 -13  -3 1472.81 111.963   2
   1  13   4 4166.19 221.334   1
  -1 -13  -4 4098.77 216.046   7
   1 -13   4 4239.50 154.853   2
   1  13   4 4332.18 188.629   5
  -1  13  -4 4331.60 217.164   1
  -1 -13  -4 4064.32 181.740   2
  -1 -13  -5 2725.55 179.792   7
  -1 -13  -5 2647.33 149.476   2
   1  13   5 2967.29 162.250   5
   1 -13   5 2741.35 126.879   2
  -1  13  -5 2809.58 176.512   1
   1 -13   6 3121.25 140.344   2
  -1 -13  -6 3158.55 167.556   2
  -1 -13  -6 3420.48 204.459   7
   1  13   6 3136.94 170.862   5
  -1  13  -6 3431.80 196.254   1
  -1 -13  -7 9091.20 298.798   2
  -1  13  -7 9246.96 327.316   1
   1  13   7 8839.10 300.503   5
  -1 -13  -7 8980.12 333.888   7
   1  13   8 5374.18 237.477   5
  -1 -13  -8 6018.90 275.016   7
  -1 -13  -8 5826.37 241.753   2
  -1  13  -8 5862.23 260.318   1
  -1  13  -8 5659.19 216.300   6
  -1 -13  -9 19551.3 525.748   7
   1  13   9 19458.9 490.811   5
  -1  13  -9 18696.7 495.894   1
  -1 -13  -9 19711.1 487.279   2
  -1  13  -9 19397.2 438.552   6
   1  13  10 6222.22 270.543   5
  -1  13 -10 5875.94 267.682   1
  -1 -13 -10 6206.65 264.975   2
  -1 -13 -10 6214.98 291.213   7
  -1 -13 -11 12571.8 398.342   2
  -1  13 -11 12087.4 397.082   1
   1  13  11 13313.5 416.147   5
  -1 -13 -11 12259.9 422.720   7
  -1 -13 -12 3391.35 222.631   7
  -1 -13 -12 3621.80 215.151   2
   1  13  12 3452.23 214.347   5
  -1 -13 -13 6724.91 301.241   2
  -1 -13 -13 7337.03 335.451   7
   1  13  13 7534.71 328.838   5
   1  13  14 1869.86 179.954   5
  -1 -13 -14 2362.92 184.052   2
   1  13  15 4.83043 83.8874   5
  -1 -13 -16-26.1661 79.1476   3
   1  13  16-4.97669 78.8582   5
  -1 -13 -17 1052.52 141.115   3
   1  13  17 1182.93 172.911   5
   1  13  18 626.369 139.314   5
   1 -14 -17 2666.05 214.555   3
   1 -14 -16 1836.06 170.932   3
   1  14 -16 1627.97 154.777   1
   1 -14 -16 1635.38 175.540   7
   1 -14 -15 459.406 97.5748   7
  -1  14  15 469.775 101.654   5
   1  14 -15 549.836 102.401   1
   1 -14 -15 657.404 117.772   3
   1  14 -14 170.086 83.4173   1
  -1  14  14 44.5830 71.4257   5
   1 -14 -14-45.9201 68.1541   3
   1 -14 -14-72.7250 75.1511   7
   1  14 -13 940.880 118.999   1
  -1  14  13 992.142 122.894   5
   1 -14 -13 895.509 123.499   3
   1 -14 -13 1158.10 142.094   7
   1  14 -12 1787.11 146.287   6
  -1  14  12 1589.43 143.677   5
   1  14 -12 1675.84 149.754   1
   1 -14 -12 1558.06 163.290   7
   1  14 -11 42.0826 58.6300   6
   1  14 -11-19.4204 72.4907   1
  -1  14  11 143.210 72.6167   5
   1 -14 -11 9.04074 71.8615   7
  -1  14  10 10751.5 342.615   5
   1  14 -10 11284.3 380.547   1
   1 -14 -10 11894.6 406.493   7
   1  14 -10 10330.2 344.359   6
   1  14  -9 308.807 83.2395   1
  -1  14   9 419.456 79.2956   5
   1 -14  -9 270.591 88.9344   7
   1  14  -9 414.236 75.0916   6
   1  14  -8 16340.5 460.618   1
   1 -14  -8 16746.7 480.352   7
  -1  14   8 15490.5 398.122   5
  -1 -14   8 15959.6 404.174   2
   1 -14  -7 795.569 110.611   7
  -1  14   7 708.504 87.0035   5
  -1  14   7 728.188 113.772   1
  -1 -14   7 523.148 73.9955   2
   1  14  -7 565.530 99.3619   1
   1  14  -6 21894.3 547.506   1
  -1  14   6 22072.7 463.357   5
   1 -14  -6 21823.2 558.280   7
  -1  14   6 22006.0 562.597   1
  -1 -14   6 22238.7 476.442   2
  -1  14   5 46.4637 46.5602   5
  -1 -14   5 72.6904 38.4120   2
  -1  14   5-4.96771 61.1206   1
   1  14  -5-88.7735 72.0630   1
   1 -14  -5-80.5413 75.6931   7
  -1  14   4 8858.56 334.789   1
   1  14  -4 9014.87 276.866   5
  -1  14   4 9224.85 260.807   5
  -1 -14   4 9000.04 272.399   2
   1 -14  -4 8884.89 331.664   7
   1  14  -4 9539.24 340.292   1
  -1 -14   3 192.444 50.3930   2
  -1  14   3 395.951 91.5650   1
  -1  14   3 161.370 44.3701   5
   1  14  -3 89.3186 51.0006   5
   1  14  -3 291.956 80.4878   1
  -1 -14   3 209.575 71.7440   7
   1 -14  -3 280.560 76.9085   7
   1  14  -2 235.989 62.5964   5
  -1 -14   2 169.391 46.6197   2
  -1  14   2 222.836 72.8585   1
  -1 -14   2 182.800 71.4035   7
  -1  14   2 148.337 45.5666   5
   1  14  -2 176.952 76.0689   1
   1 -14  -2 177.697 74.2916   7
  -1 -14   1 2389.38 172.009   7
  -1  14   1 2509.05 176.716   1
   1 -14  -1 2324.14 166.931   7
   1  14  -1 2521.26 176.066   1
   1  14  -1 2315.19 136.760   5
  -1  14   1 2534.64 124.076   5
  -1 -14   1 2310.23 132.578   2
   1  14   0 11711.1 382.792   1
  -1 -14   0 11608.8 378.718   7
  -1  14   0 10895.8 368.979   1
   1 -14   0 12044.1 380.274   7
   1  14   0 11392.8 313.532   5
  -1  14   0 11173.5 276.685   5
  -1 -14   0 11751.2 313.002   2
  -1 -14  -1 1678.60 113.401   2
   1  14   1 1612.22 144.422   1
   1 -14   1 1812.93 153.009   7
   1  14   1 1561.27 117.101   5
  -1  14  -1 1553.47 97.4722   5
  -1 -14  -1 1662.54 149.765   7
  -1  14  -1 1709.51 145.842   1
   1 -14   2 14543.9 427.383   7
  -1 -14  -2 13767.8 420.789   7
   1  14   2 13907.9 359.200   5
   1  14   2 13886.8 427.199   1
  -1 -14  -2 14113.0 357.018   2
  -1  14  -2 14364.2 427.200   1
   1  14   3 3645.40 212.937   1
  -1  14  -3 3179.35 195.626   1
   1  14   3 3094.30 164.387   5
  -1 -14  -3 3438.43 208.017   7
  -1 -14  -3 3660.07 172.272   2
  -1  14  -4 21526.8 545.284   1
   1  14   4 21901.8 485.029   5
  -1 -14  -4 22509.4 561.200   7
   1  14   4 21951.6 559.502   1
  -1 -14  -4 21651.2 477.609   2
  -1  14  -5 860.199 107.846   1
  -1 -14  -5 775.071 88.8106   2
  -1 -14  -5 873.068 117.736   7
   1  14   5 835.272 97.5620   5
   1  14   6 22939.9 515.849   5
  -1 -14  -6 22229.5 502.453   2
  -1 -14  -6 22142.1 569.487   7
  -1  14  -6 22151.0 558.107   1
  -1  14  -7 2272.81 139.582   6
  -1  14  -7 2303.27 171.550   1
   1  14   7 2224.39 155.723   5
  -1 -14  -7 1967.96 142.058   2
  -1 -14  -7 2243.44 177.065   7
  -1 -14  -8 6888.20 307.761   7
  -1  14  -8 6681.93 243.352   6
  -1  14  -8 6845.66 295.565   1
   1  14   8 6543.55 267.864   5
  -1 -14  -8 6474.31 262.637   2
  -1 -14  -9 176.752 64.6309   2
  -1  14  -9 45.3232 56.0028   1
   1  14   9 137.823 73.5416   5
  -1 -14  -9 53.9801 73.9037   7
  -1 -14 -10 299.679 89.6967   7
  -1  14 -10 521.003 96.3014   1
   1  14  10 282.605 74.7890   5
  -1 -14 -10 271.202 70.9477   2
  -1 -14 -11 884.453 118.768   2
  -1 -14 -11 825.822 126.113   7
   1  14  11 743.796 112.487   5
  -1  14 -11 774.353 113.396   1
  -1 -14 -12 3503.32 215.527   2
  -1  14 -12 3311.10 216.488   1
   1  14  12 3582.20 228.428   5
  -1 -14 -12 3367.33 232.789   7
  -1 -14 -13 1836.76 162.746   2
  -1  14 -13 1617.71 152.123   1
  -1 -14 -13 1727.06 175.387   7
  -1 -14 -14 4155.70 265.921   7
   1  14  14 4054.85 258.286   5
  -1 -14 -14 4385.17 254.448   2
  -1  14 -14 4431.89 252.734   1
  -1 -14 -15 1316.99 160.059   7
  -1  14 -15 1272.98 147.260   1
   1  14  15 1235.55 160.979   5
   1  14  16 4522.31 288.450   5
  -1  14 -16 4173.19 252.206   1
  -1 -14 -16 4270.45 269.853   3
   1  14  17 354.341 111.206   5
   1 -15 -16 4467.16 273.728   3
   1  15 -15 2890.38 206.740   1
   1 -15 -15 3200.10 241.358   7
   1 -15 -15 3325.22 230.113   3
   1 -15 -14 8978.96 364.791   3
   1 -15 -14 8286.06 371.854   7
   1  15 -14 8023.97 341.316   1
   1  15 -13 4559.04 255.675   1
   1 -15 -13 4840.95 283.102   7
   1 -15 -13 4417.63 248.863   3
   1  15 -12 13368.8 442.547   1
   1 -15 -12 14648.9 488.159   7
   1  15 -11 4182.16 241.493   1
   1 -15 -11 4437.99 263.677   7
   1  15 -10 9664.55 366.841   1
   1 -15 -10 10323.1 390.616   7
   1  15 -10 9024.17 328.961   6
   1 -15  -9 2683.01 197.886   7
   1  15  -9 2656.59 194.598   1
   1  15  -9 2361.44 166.351   6
   1  15  -8 3888.11 228.579   1
   1 -15  -8 4522.50 254.034   7
   1 -15  -7 168.256 79.2277   7
   1  15  -7 63.1877 66.0315   1
  -1 -15   6 156.448 55.8973   2
  -1  15   6 128.098 68.2805   1
   1  15  -6 110.472 70.2211   1
   1 -15  -6 78.4106 64.8152   7
  -1  15   5 201.178 82.9979   1
   1 -15  -5 180.962 75.9552   7
   1  15  -5 132.030 67.0263   1
  -1 -15   5 158.467 50.3526   2
   1  15  -4 3291.02 209.090   1
   1 -15  -4 3460.15 213.636   7
  -1 -15   4 3567.11 171.024   2
  -1  15   4 3256.03 211.409   1
   1 -15  -3 2022.55 169.252   7
  -1  15   3 2007.54 170.652   1
   1  15  -3 2054.58 132.541   5
  -1 -15   3 2124.74 132.625   2
   1  15  -3 2080.07 166.891   1
  -1 -15   3 2329.67 177.199   7
  -1 -15   2 13843.6 351.481   2
   1  15  -2 13645.5 357.126   5
  -1 -15   2 13844.0 435.462   7
   1  15  -2 13029.3 425.352   1
  -1  15   2 13522.5 435.369   1
   1 -15  -2 13613.3 432.371   7
   1  15  -1 1695.79 156.356   1
  -1 -15   1 1563.55 147.787   7
  -1  15   1 1726.15 155.106   1
   1 -15  -1 1474.95 142.262   7
  -1 -15   1 1522.53 112.568   2
   1  15  -1 1686.99 121.479   5
  -1 -15   0 12322.4 408.467   7
   1 -15   0 13311.9 423.228   7
   1  15   0 12122.0 409.912   1
  -1 -15   0 12540.3 335.641   2
  -1  15   0 12846.3 416.886   1
   1  15   0 12961.3 344.639   5
  -1 -15  -1 1033.43 129.597   7
  -1  15  -1 902.101 116.418   1
  -1 -15  -1 837.741 90.8541   2
   1  15   1 908.974 92.6540   5
   1 -15   1 1028.90 128.257   7
   1  15   1 880.873 116.468   1
   1  15   2 1775.88 161.326   1
  -1 -15  -2 1872.86 159.247   7
  -1  15  -2 1797.13 159.750   1
  -1 -15  -2 2023.17 133.692   2
   1  15   2 1898.96 131.718   5
  -1  15  -3 262.383 87.3035   1
   1  15   3 226.284 59.4110   5
  -1 -15  -3 117.253 74.4880   7
   1  15   3 301.780 92.3729   1
  -1 -15  -3 231.951 59.4324   2
  -1 -15  -4 72.6325 49.9386   2
   1  15   4 102.941 52.3835   5
  -1  15  -4-35.8024 62.1409   1
  -1 -15  -4 13.4044 76.2483   7
  -1 -15  -5 1674.98 128.151   2
  -1  15  -5 1594.15 149.505   1
  -1 -15  -5 1704.45 160.173   7
   1  15   5 1729.95 132.803   5
   1  15   6 3023.61 177.671   5
  -1 -15  -6 3144.29 175.760   2
  -1  15  -6 2861.92 197.702   1
  -1 -15  -6 2875.96 206.250   7
  -1 -15  -7 5046.54 267.586   7
  -1 -15  -7 4512.44 215.881   2
   1  15   7 4581.06 221.868   5
  -1  15  -7 4575.07 249.979   1
  -1  15  -8 9755.64 372.158   1
   1  15   8 9460.46 333.620   5
  -1 -15  -8 9468.56 376.994   7
  -1 -15  -9 6605.57 318.350   7
  -1  15  -9 6834.10 312.411   1
   1  15   9 7421.68 302.530   5
  -1 -15 -10 10411.6 406.624   7
   1  15  10 10059.6 363.588   5
  -1  15 -10 10180.5 385.753   1
   1  15  11 3178.15 210.755   5
  -1  15 -11 3376.54 223.108   1
  -1 -15 -11 3416.62 238.410   7
  -1  15 -12 7901.47 345.065   1
   1  15  12 8150.92 342.765   5
  -1 -15 -12 7702.73 360.808   7
  -1  15 -13 2313.41 193.257   1
   1  15  13 2064.32 184.774   5
  -1 -15 -13 2211.82 199.419   7
  -1  15 -14 1947.23 177.606   1
   1  15  14 1975.75 191.361   5
  -1 -15 -15 69.2823 69.8575   3
   1  15  15-16.6365 93.5564   5
  -1  15 -15 80.1213 68.3163   1
   1  16 -14-20.9286 70.1550   1
   1  16 -13-18.0248 72.9440   1
   1  16 -12-15.3357 76.6756   1
   1 -16 -12 115.393 78.8083   7
   1 -16 -11 5047.46 287.974   7
   1  16 -11 4173.57 251.843   1
   1  16 -10 76.7144 67.7012   1
   1 -16 -10 27.7455 79.2417   7
   1 -16  -9 18425.5 556.916   7
   1  16  -9 17950.0 534.774   1
   1  16  -8 794.784 121.050   1
   1 -16  -8 789.570 129.538   7
   1  16  -7 21068.7 579.267   1
   1 -16  -7 21417.5 599.078   7
   1  16  -6 375.427 98.9100   1
  -1  16   6 262.946 96.0270   1
   1 -16  -6 235.053 90.0949   7
  -1  16   5 9580.73 385.427   1
   1 -16  -5 10114.7 388.126   7
   1  16  -5 9984.98 383.238   1
   1  16  -4 114.757 76.6664   1
   1 -16  -4 58.6824 70.5339   7
  -1  16   4-49.9204 78.2424   1
  -1  16   3 3542.70 230.763   1
   1 -16  -3 3352.69 220.868   7
  -1 -16   3 3832.75 236.064   7
   1  16  -3 3382.84 220.478   1
   1 -16  -2 135.064 82.6637   7
  -1  16   2 125.008 76.0364   1
  -1 -16   2-61.0487 76.0381   7
   1  16  -2 5.56513 71.5301   1
  -1  16   1 31.6594 68.6854   1
   1 -16  -1 288.963 92.4296   7
   1  16  -1 138.057 79.1450   1
  -1 -16   1 200.931 86.1435   7
  -1  16   0-28.0023 83.9540   1
  -1 -16   0 77.8479 69.1551   7
   1  16   0 43.2731 63.8631   1
   1 -16   0-17.9712 72.2109   7
  -1 -16  -1 5210.42 278.053   7
  -1  16  -1 5126.89 272.273   1
   1 -16   1 5004.86 268.956   7
   1  16   1 5803.15 293.888   1
  -1  16  -2 331.575 96.3516   1
  -1 -16  -2 247.982 94.1599   7
   1  16   2 313.679 90.6448   1
  -1 -16  -3 18033.9 528.195   7
  -1  16  -3 16989.0 513.752   1
   1  16   3 16612.5 519.078   1
  -1  16  -4 223.907 85.6866   1
  -1 -16  -4 273.692 84.4051   7
  -1  16  -5 21775.8 596.380   1
  -1 -16  -5 22032.3 605.536   7
  -1  16  -6 247.800 87.8538   1
  -1 -16  -6 474.725 111.017   7
  -1 -16  -7 22326.9 619.471   7
  -1  16  -7 22319.1 610.129   1
  -1 -16  -8 341.384 100.968   7
  -1  16  -8 214.626 79.2401   1
  -1 -16  -9 4247.53 263.252   7
  -1  16  -9 3959.60 249.311   1
  -1  16 -10 86.3859 72.6694   1
  -1  16 -11 69.2537 63.6540   1
  -1 -16 -11 50.7713 75.1746   7
  -1  16 -12 600.568 109.769   1
  -1  16 -13 2015.79 190.551   1
   1  17 -11 8860.46 381.878   1
   1  17 -10 3216.65 228.759   1
   1 -17 -10 3148.90 241.966   7
   1  17  -9 4813.99 277.852   1
   1 -17  -9 4738.13 284.926   7
   1 -17  -8 1218.65 150.485   7
   1  17  -8 1263.16 153.044   1
   1 -17  -7 769.675 126.375   7
   1  17  -7 869.410 135.664   1
   1 -17  -6 245.194 76.9392   7
   1  17  -6 277.554 89.0891   1
   1 -17  -5 775.655 131.671   7
   1  17  -5 769.863 126.686   1
  -1  17   5 768.482 129.339   1
   1  17  -4 2988.93 220.668   1
  -1  17   4 3233.58 237.210   1
   1 -17  -4 3160.09 230.092   7
   1  17  -3 1949.16 184.102   1
   1 -17  -3 1655.92 170.000   7
  -1  17   3 1831.62 178.519   1
   1  17  -2 6338.29 319.984   1
  -1 -17   2 6602.00 321.564   7
   1 -17  -2 6890.17 326.942   7
  -1  17   2 6694.62 326.035   1
   1 -17  -1 3143.20 225.409   7
  -1  17   1 3182.13 228.196   1
   1  17  -1 2530.53 206.858   1
  -1 -17   1 2374.75 198.734   7
  -1 -17   0 5783.41 303.760   7
   1 -17   0 5630.09 300.425   7
   1  17   0 5743.81 305.461   1
  -1  17   0 6056.40 312.299   1
   1  17   1 1194.40 154.329   1
  -1 -17  -1 1137.61 138.003   7
  -1  17  -1 1178.54 144.198   1
   1  17   2 349.682 86.7562   1
  -1  17  -2 470.502 105.860   1
  -1 -17  -2 547.753 110.321   7
  -1 -17  -3 341.402 98.0616   7
  -1  17  -3 404.742 104.128   1
  -1 -17  -4 64.4799 83.6962   7
  -1  17  -4-48.3586 75.3334   1
  -1  17  -5 1583.76 166.361   1
  -1 -17  -5 1450.71 161.412   7
  -1  17  -6 1521.13 162.970   1
  -1 -17  -6 1664.19 179.397   7
  -1 -17  -7 7162.76 348.138   7
  -1  17  -7 6292.26 321.733   1
  -1 -17  -8 4489.44 279.756   7
  -1  17  -8 4335.58 268.741   1
  -1  17  -9 9180.66 393.366   1
  -1  17 -10 4281.67 270.427   1
   1  18  -6 10868.6 435.470   1
   1 -18  -5 13.2477 76.3200   7
   1  18  -5-5.68016 72.0295   1
   1 -18  -4 7702.82 365.593   7
   1  18  -4 7968.10 369.747   1
  -1  18   4 7422.26 366.907   1
  -1  18   3-64.6476 70.9925   1
   1  18  -3 34.4115 80.7218   1
   1 -18  -3 61.1228 73.9704   7
   1 -18  -2 529.729 110.492   7
  -1  18   2 887.974 144.010   1
   1  18  -2 624.842 122.038   1
   1 -18  -1 100.371 72.7039   7
  -1 -18   1-68.8363 90.3306   7
  -1  18   1-16.2083 83.8953   1
   1  18  -1 139.691 82.8374   1
   1  18   0 2221.15 199.593   1
  -1 -18   0 2803.24 222.780   7
   1 -18   0 2709.33 218.125   7
  -1  18   0 2403.91 214.502   1
   1  18   1-65.0318 75.6869   1
  -1 -18  -1-63.2860 88.5286   7
  -1  18  -1-26.2773 75.9852   1
  -1  18  -2 10854.9 434.211   1
  -1 -18  -2 10933.7 440.445   7
  -1  18  -3 255.217 99.6061   1
  -1 -18  -3 239.246 99.7161   7
  -1  18  -4 13022.3 487.648   1
  -1 -18  -4 14374.3 511.685   7
   2   0 -24 5496.56 319.261   3
   2   0 -23 43.0983 69.0159   3
   2   0 -22 5589.49 304.375   3
   2   0 -21 73.7264 75.4949   3
   2   0 -20 1028.38 134.860   3
   2   0 -19-5.93558 60.8429   3
   2   0 -18 3496.25 209.871   3
   2   0 -17 39.3145 64.2579   3
   2   0 -16 7719.82 289.264   3
   2   0 -15 16.7038 52.1438   3
   2   0 -14 20950.3 477.253   3
   2   0 -13 77.7050 52.4451   3
   2   0 -12 7973.77 251.594   3
   2   0 -11 4.17290 42.6022   3
   2   0 -10 10402.5 267.314   3
   2   0  -9-18.2393 43.7059   3
  -2   0   8 21179.1 387.854   3
  -2   0   8 21931.1 400.928   6
   2   0  -8 20940.2 384.853   3
   2   0  -7 18.9455 33.7620   3
  -2   0   7 14.3398 30.7149   3
  -2   0   7-15.7545 30.3196   6
   2   0  -6 37226.7 542.326   3
  -2   0   6 36448.3 550.618   6
  -2   0   6 38028.7 544.523   3
   2   0  -5 33.6988 29.3084   3
  -2   0   5 42.1072 27.6587   6
  -2   0   5 27.4481 29.1625   3
   2   0  -4 113987. 1365.49   6
  -2   0   4 115030. 1367.46   6
  -2   0   4 111113. 1357.37   3
   2   0  -4 112551. 1356.57   3
   2   0  -3 50.0179 26.0343   3
  -2   0   3 17.0083 23.4011   3
  -2   0   3 81.8842 26.6711   5
   2   0  -3 61.4800 27.3250   6
  -2   0   3 49.2483 25.7844   6
  -2   0   2 218706. 2500.73   5
   2   0  -2 219247. 2503.56   3
  -2   0   1 16.0572 17.1341   5
   2   0  -1 13.8961 18.1833   5
   2   0  -1 40.3116 18.3453   3
  -2   0   1-10.5735 17.5702   3
  -2   0   0 123418. 1421.64   2
  -2   0   0 122395. 1420.08   5
   2   0   1-3.49450 19.7219   2
  -2   0  -1 32.0335 23.1494   2
   2   0   1 27.0419 21.8278   5
   2   0   2 7661.81 148.337   2
  -2   0  -2 7631.38 148.918   2
  -2   0  -3 20.6371 31.1546   2
   2   0   3 132.663 32.9242   2
  -2   0  -4 9582.93 201.249   2
   2   0   4 9150.75 195.875   2
  -2   0  -5-38.4888 38.6923   2
   2   0   5 13.6594 30.9826   2
  -2   0  -6 14918.7 301.014   2
   2   0   6 14410.0 294.193   2
   2   0   7-22.3552 33.3806   2
  -2   0  -7 10.5948 36.8202   2
  -2   0  -8 6135.38 188.083   3
  -2   0  -8 6157.80 198.741   2
  -2   0  -9 30.2856 42.8707   3
  -2   0  -9-0.96339 42.1135   2
  -2   0 -10 25635.8 486.559   3
  -2   0 -11 79.2670 50.3924   3
  -2   0 -12 15635.8 383.752   3
  -2   0 -13 20.1051 54.9193   3
  -2   0 -14 600.590 87.7827   3
  -2   0 -15-46.6214 59.1079   3
  -2   0 -16 345.438 77.7345   3
  -2   0 -17-63.2398 73.3817   3
  -2   0 -18 8534.99 337.956   3
  -2   0 -19-45.4385 69.8404   3
  -2   0 -20 7377.34 335.941   3
  -2   0 -21-115.625 85.6369   3
  -2   0 -22 5349.19 305.041   3
  -2   0 -23 83.3624 78.2823   3
   2   1 -24 3708.38 268.645   3
   2  -1 -24 3899.78 268.802   3
   2   1 -23 3451.57 249.791   3
   2  -1 -23 2957.50 234.996   3
   2  -1 -22 10282.3 416.853   3
   2   1 -22 10502.7 421.584   3
   2   1 -21 13713.9 474.900   3
   2  -1 -21 13308.7 462.703   3
   2  -1 -20 15915.9 492.183   3
   2   1 -20 15359.2 487.638   3
   2  -1 -19 20364.8 550.169   3
   2   1 -19 20118.2 550.389   3
   2   1 -18 29741.4 670.368   3
   2  -1 -18 29468.1 667.869   3
   2   1 -17 9092.37 328.844   3
   2  -1 -17 8777.72 323.984   3
   2   1 -16 6205.59 260.102   3
   2  -1 -16 6625.01 267.744   3
   2   1 -15 1816.33 136.649   3
   2  -1 -15 1767.94 138.906   3
   2   1 -14 686.134 92.4552   3
   2  -1 -14 679.097 87.8820   3
   2   1 -13 232.472 60.0089   3
   2  -1 -13 360.101 71.8334   3
   2   1 -12 2945.55 150.590   3
   2  -1 -12 2892.61 149.542   3
   2  -1 -11 12810.5 315.149   3
   2   1 -11 12316.8 312.452   3
   2  -1 -10 9804.32 256.195   3
   2   1 -10 9034.02 251.601   3
  -2   1   9 41324.7 657.475   2
   2   1  -9 41216.1 650.740   3
   2  -1  -9 42636.8 652.620   3
   2   1  -8 27244.8 467.462   3
   2  -1  -8 28182.1 468.735   3
  -2  -1   8 27608.8 478.687   6
   2  -1  -8 28121.5 376.737   1
  -2   1   8 28449.2 477.973   2
  -2  -1   8 28346.4 471.972   3
  -2   1   8 28029.1 471.785   3
  -2   1   7 11768.7 248.169   3
  -2  -1   7 11272.8 252.161   6
  -2  -1   7 11417.4 246.739   3
   2   1  -7 11277.7 247.395   3
   2  -1  -7 11402.1 176.024   1
   2  -1  -7 11492.9 243.542   3
  -2  -1   6 68750.8 869.258   6
   2  -1  -6 63978.8 760.186   1
  -2  -1   6 62905.5 851.665   3
   2   1  -6 62303.7 854.369   6
   2   1  -6 64413.6 853.724   3
   2  -1  -6 65090.2 848.872   3
  -2   1   6 62948.4 847.362   3
  -2  -1   5 1080.40 62.1359   3
   2   1  -5 1031.93 63.9406   3
  -2   1   5 1262.33 65.2337   3
   2  -1  -5 1188.99 62.0093   3
   2   1  -5 1232.72 69.0181   6
   2  -1  -5 1197.81 36.0161   1
  -2  -1   5 1341.21 71.2610   6
   2  -1  -4 15739.7 247.162   3
  -2  -1   4 14161.8 248.145   5
  -2  -1   4 14698.0 255.231   6
  -2   1   4 15282.6 247.240   3
  -2   1   4 14951.3 196.491   1
   2   1  -4 15104.7 257.857   6
   2   1  -4 14463.6 252.168   3
  -2  -1   4 14944.0 254.515   3
   2   1  -3 1921.66 70.0867   3
  -2   1   3 1954.01 68.8397   6
   2  -1  -3 2033.29 63.8209   3
  -2  -1   3 1916.18 70.5250   3
  -2   1   3 1972.53 63.7187   3
   2   1  -3 2083.47 71.9041   5
  -2  -1   3 1902.74 69.1544   5
  -2  -1   3 2013.81 41.7582   1
   2   1  -3 1941.05 72.5002   6
   2  -1  -2 11013.9 145.261   7
  -2   1   2 11075.7 165.948   3
  -2  -1   2 10978.5 149.144   7
   2  -1  -2 10947.3 165.436   3
  -2  -1   2 10614.0 181.790   3
   2   1  -2 10816.2 180.827   5
  -2  -1   2 10280.4 179.661   5
  -2   1   2 10616.5 160.224   5
  -2   1   2 11015.3 174.016   6
   2   1  -2 11154.3 183.978   3
   2   1  -2 10882.8 148.663   7
  -2   1   1 6140.46 97.3291   3
  -2   1   1 6209.06 95.5068   5
  -2   1   1 6206.94 101.617   6
   2  -1  -1 6247.76 95.1558   5
   2   1  -1 5920.92 121.022   3
   2  -1  -1 6156.44 102.181   6
   2  -1  -1 6504.27 97.3610   3
   2   1  -1 6471.96 120.865   5
  -2  -1   1 6153.06 121.176   3
  -2  -1   1 6131.69 120.110   5
  -2   1   1 6063.68 94.0899   7
   2   1   0 37818.8 490.017   5
  -2  -1   0 36486.6 491.094   2
   2  -1   0 38144.7 460.943   2
  -2  -1   0 39431.7 461.532   4
   2   1   0 39287.1 492.369   2
  -2   1   0 38294.4 461.782   2
  -2  -1   0 37738.4 491.756   5
  -2   1   0 38156.2 457.630   5
   2  -1   0 38615.5 456.785   5
   2   1   0 38735.3 462.768   4
  -2  -1  -1 2987.14 84.3049   5
   2  -1   1 3298.13 72.4971   2
   2   1   1 3087.64 84.1378   5
  -2   1  -1 3292.24 74.1802   2
   2   1   1 3202.58 85.7979   2
  -2   1  -1 3149.11 60.2743   4
  -2  -1  -1 3199.72 85.9559   2
   2   1   2 24209.2 351.120   2
   2  -1   2 24129.9 333.351   2
   2  -1   2 24140.9 302.831   4
  -2  -1  -2 23479.8 351.777   2
  -2   1  -2 23930.2 304.383   4
  -2   1  -2 23412.4 335.576   2
   2   1   3 87189.7 1094.92   2
   2  -1   3 90992.9 1039.29   4
  -2  -1  -3 81463.6 1090.97   2
  -2   1  -3 90012.5 1085.63   2
   2  -1   3 89183.4 1081.34   2
   2  -1   4 511.351 46.3475   2
  -2   1  -4 390.641 48.8148   2
   2   1   4 459.227 47.4650   2
  -2  -1  -4 413.450 50.6521   2
  -2   1  -5 17376.0 314.218   2
   2   1   5 17211.1 317.200   2
  -2  -1  -5 17159.4 319.964   2
   2  -1   5 17128.7 308.606   2
  -2   1  -6 10715.6 225.764   3
  -2   1  -6 10068.8 235.208   2
  -2  -1  -6 9138.83 230.736   2
   2  -1   6 10343.9 235.215   2
   2   1   6 9894.98 233.523   2
   2   1   7 283.810 49.0840   2
  -2   1  -7 231.761 50.2538   2
   2  -1   7 303.772 50.6712   2
  -2  -1  -7 217.164 52.7115   2
  -2   1  -7 650.688 61.9945   3
  -2   1  -8 4579.71 158.028   3
  -2  -1  -8 4139.56 165.259   2
  -2   1  -9 19371.2 385.332   3
  -2  -1  -9 18627.0 402.947   2
  -2  -1 -10 22155.8 465.942   2
  -2   1 -10 22493.6 444.865   3
  -2  -1 -10 22731.5 453.659   3
  -2   1 -11 9625.30 275.717   3
  -2  -1 -11 9449.32 291.320   2
  -2  -1 -11 9757.24 282.997   3
  -2   1 -12 33380.0 613.044   3
  -2  -1 -12 31901.3 611.058   3
  -2   1 -13 39483.4 712.036   3
  -2  -1 -13 39382.0 719.771   3
  -2   1 -14 46653.9 813.408   3
  -2  -1 -14 44090.3 805.799   3
  -2   1 -15 36396.2 720.681   3
  -2  -1 -15 37766.2 735.990   3
  -2   1 -16 21461.4 528.324   3
  -2  -1 -16 21390.6 530.888   3
  -2   1 -17 6072.50 270.673   3
  -2  -1 -17 6017.96 275.112   3
  -2  -1 -18 3294.57 210.410   3
  -2   1 -18 2889.18 196.761   3
  -2  -1 -19 1460.09 152.829   3
  -2   1 -19 1536.90 151.609   3
  -2   1 -20 712.634 123.426   3
  -2  -1 -20 370.396 94.2259   3
  -2   1 -21-17.7777 79.0412   3
  -2  -1 -21-9.97956 78.2526   3
  -2   1 -22 451.279 120.538   3
  -2  -1 -22 521.538 111.343   3
  -2   1 -23 571.734 114.995   3
  -2  -1 -23 562.963 116.916   3
   2  -2 -24 338.293 93.3810   3
   2   2 -24 616.325 123.769   3
   2   2 -23 6159.70 335.688   3
   2  -2 -23 6712.47 345.112   3
   2  -2 -22 158.054 89.3030   3
   2   2 -22 57.5572 72.7708   3
   2  -2 -21 2081.66 188.146   3
   2   2 -21 2049.63 190.931   3
   2  -2 -20-21.4792 72.3928   3
   2   2 -20 14.2177 63.5560   3
   2   2 -19 1658.31 154.520   3
   2  -2 -19 1393.98 142.240   3
   2   2 -18 3221.13 204.310   3
   2  -2 -18 3014.47 198.563   3
   2   2 -17 11654.4 379.080   3
   2  -2 -17 10981.9 365.798   3
   2   2 -16 177.430 63.9854   3
   2  -2 -16 126.016 60.2823   3
   2   2 -15 27274.6 582.231   3
   2  -2 -15 26570.7 572.786   3
   2  -2 -15 26429.5 439.385   1
   2  -2 -14 669.098 85.2721   3
   2  -2 -14 562.084 53.0727   1
   2   2 -14 541.958 77.6837   3
   2  -2 -13 41507.1 725.325   3
   2  -2 -13 41094.4 592.226   1
   2   2 -13 41317.4 726.383   3
   2  -2 -12 6854.74 165.925   1
   2  -2 -12 6699.26 230.561   3
   2   2 -12 6547.69 229.308   3
   2   2 -11 12860.9 319.532   3
   2  -2 -11 12599.5 314.696   3
   2  -2 -11 12684.9 236.960   1
   2  -2 -10 49.3716 43.3824   3
   2  -2 -10 51.6168 25.7658   1
   2   2 -10 28.5160 40.0213   3
   2  -2  -9 80.0242 23.3869   1
   2   2  -9 100.939 43.5120   3
  -2   2   9 84.5588 37.9440   2
   2  -2  -9 106.520 39.0929   3
  -2  -2   8 3026.39 123.145   3
   2  -2  -8 2908.82 123.185   3
   2  -2  -8 3045.51 87.4442   1
   2   2  -8 3203.50 129.508   6
  -2  -2   8 3199.33 129.939   6
  -2   2   8 3090.80 126.509   2
   2   2  -8 3012.49 126.909   3
   2  -2  -7 57214.2 712.987   1
   2   2  -7 58148.1 800.302   6
   2  -2  -7 56376.8 788.666   3
  -2  -2   7 57870.2 806.299   6
  -2   2   7 57389.6 794.956   2
  -2  -2   7 57153.5 797.912   3
   2   2  -7 56642.5 797.771   3
   2   2  -6 1217.11 73.0766   3
  -2   2   6 1371.35 72.4179   2
   2  -2  -6 1259.78 49.7633   1
  -2  -2   6 1357.29 75.0733   5
   2  -2  -6 1371.57 75.3040   3
  -2  -2   6 1391.55 77.5294   3
   2   2  -6 1449.40 78.5992   6
   2   2  -5 8237.96 187.684   3
  -2  -2   5 8543.37 188.291   5
   2   2  -5 7941.39 185.366   6
  -2   2   5 8468.11 147.015   1
   2  -2  -5 8526.22 178.683   3
  -2   2   5 8193.35 177.808   2
  -2  -2   5 8837.92 192.261   3
  -2   2   4 12897.0 197.984   1
   2  -2  -4 13128.4 220.573   3
   2   2  -4 13085.7 235.074   5
   2   2  -4 12802.8 237.857   3
   2   2  -4 12894.7 239.415   6
   2   2  -4 12448.2 207.351   7
  -2  -2   4 12808.7 235.082   5
  -2  -2   4 13695.5 241.351   3
   2   2  -4 13164.7 190.076   1
   2   2  -3 65871.2 832.895   3
   2   2  -3 66292.8 827.382   5
  -2  -2   3 65078.5 828.206   5
   2   2  -3 65059.0 794.834   7
   2  -2  -3 64964.5 799.215   3
   2   2  -3 66542.7 785.417   1
  -2  -2   3 66006.8 831.941   3
   2  -2  -2 315.661 23.4006   3
   2   2  -2 289.382 25.9118   7
   2   2  -2 282.809 28.7707   1
  -2  -2   2 295.131 28.0338   1
  -2  -2   2 215.691 32.0969   4
   2   2  -2 253.542 37.1337   5
  -2  -2   2 234.287 33.6412   3
  -2   2   2 396.307 32.5412   3
  -2  -2   2 292.214 27.1665   7
  -2  -2   2 250.970 32.8973   5
   2   2  -2 391.079 39.6952   3
   2  -2  -2 296.355 25.0429   7
   2   2  -1 161178. 1869.92   5
  -2  -2   1 157951. 1858.18   4
   2   2  -1 160611. 1874.46   3
  -2   2   1 163493. 1842.05   7
   2   2  -1 156569. 1860.26   4
  -2  -2   1 158209. 1870.68   5
  -2  -2   1 162996. 1877.61   3
  -2  -2   0 772.658 38.3754   4
  -2  -2   0 720.245 45.5447   5
   2   2   0 700.953 44.8293   2
   2   2   0 756.145 37.2638   4
  -2   2   0 731.140 39.1787   7
  -2  -2   0 689.425 44.4685   2
   2   2   0 741.990 48.0165   5
   2   2   1 109723. 1313.37   5
   2  -2   1 110706. 1263.60   2
  -2   2  -1 110420. 1266.46   2
   2   2   1 106673. 1310.81   2
  -2  -2  -1 107805. 1316.60   5
  -2   2  -2 7535.38 135.261   4
  -2   2  -2 7506.56 124.060   3
   2  -2   2 7439.32 135.840   2
   2   2   2 7328.59 162.104   5
  -2  -2  -2 7301.12 161.228   2
  -2   2  -2 7281.65 137.666   2
   2   2   2 7561.37 160.941   2
   2   2   3 9219.48 194.575   2
   2  -2   3 9493.00 164.895   4
  -2   2  -3 9227.13 166.017   4
  -2   2  -3 9402.37 162.548   3
  -2   2  -3 9246.19 178.415   2
  -2  -2  -3 9730.51 199.401   2
   2  -2   3 9554.05 177.165   2
   2  -2   3 9316.27 148.982   6
   2   2   4 2241.36 93.6543   2
  -2   2  -4 2335.27 78.9545   3
  -2  -2  -4 2428.80 99.0533   2
   2  -2   4 2360.42 76.5848   4
   2  -2   4 2170.11 85.1817   2
   2  -2   4 2396.31 73.1413   6
   2  -2   5 23636.0 354.546   6
   2   2   5 23082.3 399.073   2
   2  -2   5 23815.1 383.558   2
  -2   2  -5 23454.0 365.716   3
   2  -2   5 23176.6 352.584   4
  -2  -2  -5 23477.8 401.117   2
   2  -2   6 29502.4 437.615   4
  -2   2  -6 29016.9 454.119   3
   2  -2   6 30011.6 445.741   6
   2   2   6 29302.1 488.992   2
   2  -2   6 29370.0 472.378   2
  -2  -2  -6 28975.9 489.520   2
   2   2   7 37444.3 610.078   2
   2  -2   7 38199.4 567.865   6
   2  -2   7 39144.2 600.320   2
  -2  -2  -7 39243.8 619.424   2
  -2   2  -7 38134.9 576.228   3
   2  -2   7 37968.9 555.331   4
  -2  -2  -8 7952.54 231.965   2
  -2   2  -8 7432.09 206.194   3
   2  -2   8 7598.01 201.608   6
  -2   2  -9 20309.4 397.184   3
  -2  -2  -9 20274.4 426.132   2
   2  -2   9 20206.4 389.992   6
  -2   2 -10 1514.34 102.307   3
  -2  -2 -10 1473.93 107.915   2
  -2  -2 -11 27592.3 557.072   2
  -2  -2 -11 27104.3 539.310   3
  -2   2 -11 27703.7 525.223   3
  -2  -2 -12 1108.56 102.078   3
  -2   2 -12 906.127 93.2978   3
  -2  -2 -12 863.606 96.5409   2
  -2   2 -13 1034.46 99.7042   3
  -2  -2 -13 893.840 100.911   3
  -2  -2 -14 264.876 72.3716   3
  -2   2 -14 157.489 59.2938   3
  -2   2 -15 1884.43 141.780   3
  -2  -2 -15 1439.08 127.124   3
  -2  -2 -16 569.339 94.3713   3
  -2   2 -16 413.224 85.8953   3
  -2  -2 -17 14487.8 441.840   3
  -2   2 -17 14633.0 437.125   3
  -2  -2 -18 1820.81 160.408   3
  -2   2 -18 1833.10 158.711   3
  -2   2 -19 14484.8 465.911   3
  -2  -2 -19 13886.2 460.850   3
  -2  -2 -20 2207.49 187.876   3
   2  -2  20 2233.59 168.678   4
  -2   2 -20 2167.16 184.132   3
   2  -2  21 10800.5 378.425   4
  -2   2 -21 10582.5 420.836   3
  -2  -2 -21 10236.6 420.842   3
   2  -2  22 1554.55 146.032   4
  -2   2 -22 1605.50 172.578   3
  -2  -2 -22 1682.01 180.027   3
  -2   2 -23 3221.29 243.582   3
  -2  -2 -23 3478.61 256.484   3
  -2  -3  25 104.307 79.2921   4
   2   3 -24 1014.40 152.615   3
  -2  -3  24 1094.87 140.008   4
   2  -3 -24 994.575 136.701   3
   2   3 -23 5220.10 309.963   3
   2  -3 -23 5448.20 314.193   3
   2   3 -22 6988.00 342.509   3
   2  -3 -22 7646.42 357.265   3
   2  -3 -21 6580.70 323.355   3
   2   3 -21 6301.23 319.583   3
   2  -3 -20 18164.8 535.067   3
   2   3 -20 18677.2 544.640   3
   2   3 -19 6404.40 297.724   3
   2  -3 -19 6608.62 297.275   3
   2  -3 -18 10995.9 377.052   3
   2   3 -18 10602.7 375.904   3
   2  -3 -17 8815.57 325.072   3
   2   3 -17 8087.50 313.231   3
   2   3 -16 1300.75 125.835   3
   2  -3 -16 1138.19 117.458   3
   2   3 -15 1237.12 118.174   3
   2  -3 -15 1252.88 118.584   3
   2  -3 -15 1224.33 78.7008   1
   2   3 -14 460.876 78.9490   3
   2  -3 -14 420.098 45.6734   1
   2  -3 -14 541.907 76.8377   3
   2   3 -13 1643.87 120.232   3
   2  -3 -13 1382.14 111.274   3
   2  -3 -13 1530.39 81.1196   1
   2   3 -12 2934.11 151.645   3
   2  -3 -12 3094.33 154.702   3
   2  -3 -12 2751.46 106.105   1
   2  -3 -11 9137.72 199.504   1
   2  -3 -11 8522.50 253.942   3
   2   3 -11 8733.63 258.908   3
   2  -3 -10 28648.5 512.884   3
   2  -3 -10 28748.7 433.107   1
   2   3 -10 27860.4 513.511   3
   2   3  -9 10027.8 258.411   6
   2  -3  -9 10588.3 260.279   3
   2  -3  -9 10465.4 207.467   1
   2   3  -9 10673.0 265.557   3
  -2   3   9 10718.6 265.720   2
  -2  -3   8 72995.2 993.131   3
   2  -3  -8 71754.6 911.443   1
   2   3  -8 71855.2 993.383   3
   2   3  -8 74566.9 995.583   6
  -2   3   8 71099.0 987.452   2
   2  -3  -8 70910.5 982.737   3
  -2  -3   7 26945.1 450.717   5
  -2  -3   7 28459.4 458.813   3
   2  -3  -7 27576.6 445.336   3
   2  -3  -7 25907.9 391.242   1
  -2   3   7 27138.9 445.641   2
   2   3  -7 27768.9 457.658   3
   2   3  -7 26639.4 452.229   6
   2   3  -6 28361.7 455.233   6
   2  -3  -6 28355.7 440.633   3
   2   3  -6 28515.1 457.211   3
  -2  -3   6 27816.5 452.027   5
  -2  -3   6 29664.8 459.486   3
   2  -3  -6 28042.9 402.419   1
  -2   3   6 28588.3 406.053   1
  -2   3   6 27875.6 440.459   2
  -2   3   5 14353.9 237.994   1
  -2  -3   5 14713.9 274.724   3
   2   3  -5 14611.1 251.870   7
  -2   3   5 14308.6 254.599   2
   2   3  -5 15119.1 278.777   6
   2  -3  -5 14188.8 255.508   3
   2   3  -5 14754.7 275.700   3
  -2  -3   5 14335.8 282.919   4
  -2  -3   5 14100.0 270.248   5
  -2  -3   4 5299.50 141.105   5
  -2  -3   4 5505.22 143.512   3
   2   3  -4 5595.91 143.794   5
   2  -3  -4 5313.89 125.721   3
   2   3  -4 5494.46 144.299   3
  -2  -3   4 5338.50 146.109   4
  -2   3   4 5484.30 123.193   2
   2   3  -4 5388.08 117.213   1
   2   3  -4 5255.39 125.679   7
  -2   3   4 5315.65 122.077   1
   2   3  -3 2311.12 85.2443   5
   2  -3  -3 2307.38 69.4620   3
  -2  -3   3 2269.73 88.1959   4
   2  -3  -3 2248.80 73.4423   7
  -2  -3   3 2287.83 84.1183   5
   2   3  -3 2140.94 84.8229   3
   2   3  -3 2251.43 74.6586   7
  -2   3   3 2297.27 65.1305   2
  -2  -3   3 2358.23 77.2691   7
   2   3  -3 2194.96 71.9989   1
  -2  -3   3 2098.86 82.4231   3
   2   3  -2 22055.9 345.335   3
   2  -3  -2 22868.2 322.934   7
   2   3  -2 22142.3 324.528   7
   2   3  -2 22874.6 326.283   1
  -2  -3   2 20390.3 338.217   3
   2   3  -2 23423.8 342.536   5
   2   3  -2 21690.2 341.601   4
  -2  -3   2 22465.0 325.408   1
  -2  -3   2 22095.9 324.150   7
  -2  -3   2 22273.9 341.348   5
  -2  -3   2 22536.1 342.572   4
  -2   3   2 22356.3 282.628   2
  -2  -3   1 178.358 30.9976   4
   2   3  -1 157.031 34.5394   3
   2   3  -1 63.1496 29.5356   5
  -2   3   1 129.905 27.1871   7
  -2  -3   1 115.045 31.0649   5
   2  -3  -1 123.842 28.4972   7
  -2  -3   1 98.1643 28.7191   1
   2   3  -1 165.252 32.5525   1
  -2  -3   1 112.661 26.3189   7
   2   3  -1 167.232 30.9643   4
  -2  -3   1 146.568 33.4918   3
   2   3   0 410.667 39.7152   2
  -2  -3   0 345.085 38.0667   1
   2   3   0 421.853 38.6735   4
  -2  -3   0 407.136 42.0728   2
   2  -3   0 419.432 37.4468   7
  -2   3   0 427.470 35.5982   7
  -2  -3   0 486.132 43.1593   5
   2   3   0 489.356 46.8561   5
  -2  -3   0 393.375 41.1505   3
   2   3   1 50280.1 678.479   5
  -2  -3  -1 51743.1 684.789   5
  -2  -3  -1 52311.5 679.681   2
   2  -3   1 51781.7 614.049   2
  -2  -3  -1 51791.2 683.247   1
  -2   3  -1 51413.5 669.500   7
   2   3   1 51744.0 677.075   2
   2  -3   2 12105.0 191.113   2
   2  -3   2 12384.6 175.328   3
   2   3   2 12386.0 230.128   2
  -2   3  -2 12414.9 212.916   4
   2   3   2 12599.8 234.371   5
  -2  -3  -2 12056.4 230.783   2
  -2   3  -2 11932.7 166.644   6
  -2   3  -2 12241.2 176.587   3
   2   3   3 7064.85 173.889   5
  -2   3  -3 7110.37 133.515   3
   2   3   3 7202.20 173.680   2
   2  -3   3 7065.19 148.332   2
  -2   3  -3 7747.62 158.134   4
   2  -3   3 7503.88 154.871   4
  -2  -3  -3 7059.82 174.633   2
  -2  -3  -4 54030.0 747.305   2
  -2   3  -4 53651.8 710.694   4
   2   3   4 52993.7 747.491   2
   2  -3   4 52180.3 712.191   2
  -2   3  -4 55771.4 694.397   3
   2  -3   4 54791.0 707.977   4
  -2  -3  -5 3879.37 139.618   2
   2  -3   5 3767.29 102.707   6
   2   3   5 3883.85 136.141   2
   2  -3   5 3769.18 114.415   4
  -2   3  -5 3786.58 112.898   3
   2  -3   5 4007.38 125.389   2
   2  -3   6 11205.8 218.337   6
  -2  -3  -6 11021.1 260.915   2
   2  -3   6 11091.8 242.337   2
   2  -3   6 10902.6 225.273   4
  -2   3  -6 11164.4 231.048   3
   2   3   6 10910.6 259.052   2
   2  -3   7 416.384 47.5724   6
   2  -3   7 429.514 51.8783   2
  -2   3  -7 380.836 47.0534   3
   2  -3   7 384.556 49.7436   4
  -2  -3  -7 382.924 58.3044   2
  -2  -3  -8 1039.57 91.7692   2
   2  -3   8 1044.76 74.8463   6
   2  -3   8 1029.98 73.1855   4
  -2   3  -8 1060.98 74.6430   3
   2  -3   9 13006.7 284.922   4
  -2   3  -9 13313.4 300.851   3
  -2  -3  -9 13471.5 333.213   2
   2  -3   9 12684.6 290.191   6
   2  -3  10 11391.3 271.233   4
  -2  -3 -10 10724.2 306.379   2
  -2   3 -10 11360.0 287.876   3
   2  -3  11 14597.8 330.328   4
  -2  -3 -11 15339.2 385.195   2
  -2   3 -11 14708.7 352.681   3
  -2  -3 -12 23552.5 526.336   2
   2  -3  12 24117.2 469.529   4
  -2   3 -12 24812.8 502.678   3
  -2  -3 -13 20022.8 489.081   2
  -2   3 -13 20067.6 459.080   3
  -2  -3 -13 20646.1 479.864   3
   2  -3  13 19932.5 430.773   4
  -2   3 -14 17816.2 437.645   3
  -2  -3 -14 16220.7 440.245   3
   2  -3  14 16375.4 393.821   4
  -2   3 -15 22173.3 518.058   3
  -2  -3 -15 21261.8 522.197   3
   2  -3  15 20848.1 470.806   4
  -2   3 -16 17646.7 474.849   3
   2  -3  16 17976.0 441.422   4
  -2  -3 -16 18897.2 497.872   3
   2  -3  17 6833.14 265.609   4
  -2  -3 -17 7149.35 305.258   3
  -2   3 -17 6944.69 293.425   3
  -2   3 -18 3729.43 223.865   3
   2  -3  18 3577.90 197.431   4
  -2  -3 -18 3631.92 223.009   3
  -2  -3 -19 1700.69 164.269   3
  -2   3 -19 1940.45 168.968   3
   2  -3  19 2028.86 154.046   4
  -2  -3 -20 23.1038 69.5530   3
  -2   3 -20 46.0064 60.6730   3
   2  -3  20 10.7804 54.5434   4
  -2   3 -21 84.8106 83.5772   3
  -2  -3 -21 110.761 88.3053   3
   2  -3  21 107.120 68.3538   4
   2  -3  22 3405.44 216.057   4
  -2   3 -22 3174.56 239.406   3
  -2  -3 -22 2978.79 231.915   3
  -2   3 -23 901.608 149.164   3
  -2  -4  24 4743.17 294.824   4
   2   4 -24 5055.31 310.914   3
   2   4 -23 1752.08 184.524   3
   2  -4 -23 1974.71 193.006   3
  -2  -4  23 1881.04 188.275   4
   2   4 -22 1168.45 152.998   3
  -2  -4  22 1394.29 162.934   4
   2  -4 -22 1062.91 144.598   3
  -2  -4  21 237.545 82.4210   4
   2  -4 -21 242.345 94.7360   3
   2   4 -21 205.046 79.2151   3
   2   4 -20-43.7049 63.4212   3
   2  -4 -20 43.5429 74.5261   3
  -2  -4  20 35.8844 64.2543   4
   2   4 -19 1063.19 129.495   3
   2  -4 -19 1183.88 133.331   3
   2   4 -18 3564.30 215.551   3
   2  -4 -18 3889.74 224.266   3
   2   4 -17 4950.21 246.265   3
   2  -4 -17 5262.27 249.447   3
   2   4 -16 29701.3 641.861   3
   2  -4 -16 29882.4 640.937   3
   2  -4 -15 1187.96 116.876   3
   2   4 -15 1384.92 121.711   3
   2   4 -14 48754.8 846.482   3
   2  -4 -14 48989.3 843.661   3
   2  -4 -13 17294.7 414.446   3
   2   4 -13 16720.3 411.060   3
   2  -4 -13 17084.6 331.792   1
   2  -4 -12 11861.4 319.348   3
   2   4 -12 11334.1 316.086   3
   2  -4 -12 11937.9 257.039   1
   2   4 -11 21228.0 443.793   3
   2  -4 -11 21302.2 370.198   1
   2  -4 -11 21110.4 438.428   3
   2   4 -10 4892.41 185.220   3
   2  -4 -10 5221.14 186.140   3
   2   4 -10 5402.33 189.824   6
   2  -4 -10 5076.79 146.691   1
   2  -4  -9 576.708 51.0244   1
  -2   4   9 513.266 65.2473   2
   2  -4  -9 535.196 63.7591   3
  -2  -4   9 500.823 65.1884   4
   2   4  -9 513.524 64.7284   3
   2   4  -9 577.355 68.4583   6
   2  -4  -8 6698.79 162.091   1
  -2   4   8 6240.81 187.701   2
   2   4  -8 6525.86 194.006   6
  -2  -4   8 6342.89 205.754   4
   2   4  -8 6484.89 194.024   3
   2  -4  -8 6328.67 188.273   3
  -2   4   7 473.445 53.9504   2
  -2  -4   7 574.292 59.4215   5
   2   4  -7 489.938 61.6360   3
   2  -4  -7 486.342 45.6505   1
  -2  -4   7 561.251 56.8321   3
   2   4  -7 450.851 56.1804   6
   2  -4  -7 504.990 61.8488   3
  -2  -4   7 427.615 57.6153   4
   2   4  -7 419.137 46.3724   7
  -2  -4   6 49577.6 705.372   3
  -2  -4   6 47199.6 694.388   5
   2   4  -6 48781.4 701.276   6
  -2  -4   6 49107.4 719.368   4
   2  -4  -6 48741.4 683.182   3
  -2   4   6 47920.9 677.942   2
  -2   4   6 49066.4 660.537   1
   2   4  -6 49198.7 703.426   3
   2   4  -6 48404.0 677.653   7
   2   4  -5 80.1500 28.0833   1
  -2  -4   5 86.1200 45.7759   4
   2   4  -5 60.2203 34.2232   5
  -2   4   5 24.8987 25.8299   2
  -2  -4   5 48.4846 29.3582   3
   2   4  -5 54.4075 31.5879   3
  -2   4   5 51.0909 30.8403   1
  -2  -4   5 9.72530 31.4827   5
   2   4  -5 28.7450 27.9442   7
   2   4  -4 91256.3 1106.17   7
  -2  -4   4 86952.6 1102.33   7
  -2  -4   4 87486.9 1119.20   5
   2   4  -4 90240.2 1121.20   5
   2   4  -4 89120.5 1089.15   1
  -2  -4   4 87029.2 1121.31   3
  -2   4   4 87597.7 1072.27   2
  -2  -4   4 88620.0 1138.29   4
   2   4  -4 84093.0 1121.66   3
  -2   4   4 88650.0 1098.91   1
   2   4  -3 57.4490 29.7518   1
   2   4  -3 50.3796 23.9459   7
  -2   4   3 82.3835 32.5111   1
  -2  -4   3 18.5662 26.8797   5
  -2  -4   3 73.8265 37.2421   4
   2   4  -3 50.7262 29.4613   4
  -2   4   3 45.4958 19.0343   2
   2   4  -3 73.0520 34.3938   3
   2   4  -3 51.1172 31.1670   5
   2  -4  -3 80.0037 20.3229   2
  -2  -4   3 53.3879 29.9611   3
   2  -4  -3 31.4090 28.8820   7
  -2  -4   3 61.4467 31.1552   7
   2   4  -2 80132.7 1031.46   4
  -2   4   2 79934.2 938.659   2
   2   4  -2 82327.7 1020.96   5
  -2  -4   2 80192.5 1028.10   4
   2   4  -2 83394.2 1014.81   7
   2   4  -2 82218.0 1012.43   1
  -2  -4   2 81083.6 1028.07   3
  -2  -4   2 81908.6 1013.80   1
   2   4  -2 82509.1 1030.18   3
  -2  -4   2 80712.3 1023.05   5
   2  -4  -2 82785.9 1008.06   7
  -2  -4   2 81902.9 1012.86   7
   2  -4  -2 78571.5 940.844   2
  -2   4   1 3952.36 70.0550   5
   2   4  -1 4117.93 118.452   5
  -2  -4   1 4187.81 118.420   1
  -2   4   1 4193.78 113.839   7
  -2  -4   1 4091.66 116.697   2
  -2  -4   1 4175.98 121.963   4
  -2  -4   1 4311.15 118.316   7
   2   4  -1 4164.75 120.350   4
  -2  -4   1 4353.61 122.823   5
  -2  -4   1 4054.60 122.072   3
   2  -4  -1 4141.19 114.422   7
   2   4  -1 4355.44 120.767   1
  -2  -4   0 47112.6 633.685   5
   2   4   0 46088.8 633.181   1
   2   4   0 47284.4 625.206   4
   2  -4   0 44044.0 544.645   3
   2  -4   0 48674.6 624.846   7
  -2   4   0 46977.7 622.939   7
  -2  -4   0 45817.8 631.330   1
  -2  -4   0 45657.7 627.201   2
   2   4   0 48136.1 631.288   5
  -2  -4   0 48212.4 641.081   3
  -2  -4   0 46291.9 624.035   7
   2  -4   1 170.860 15.0313   3
  -2  -4  -1 255.798 41.7504   5
  -2   4  -1 208.527 35.7925   4
  -2   4  -1 173.927 16.0517   3
  -2   4  -1 208.731 35.2195   7
   2  -4   1 184.579 15.4473   5
  -2  -4  -1 190.274 39.4035   1
   2   4   1 227.216 37.2180   5
   2   4   1 179.750 32.6594   4
   2   4   1 225.761 36.6764   2
  -2  -4  -1 251.483 39.1071   2
   2   4   2 1592.88 80.2358   5
   2  -4   2 1606.36 46.8261   3
  -2   4  -2 1640.47 78.2019   7
   2  -4   2 1579.65 49.9392   5
   2   4   2 1623.80 76.2170   2
  -2  -4  -2 1502.81 76.8553   2
  -2   4  -2 1623.95 48.0221   3
  -2   4  -2 1590.53 76.6020   4
  -2  -4  -2 1701.05 81.6034   1
   2   4   3 18597.4 329.686   5
  -2   4  -3 18453.7 264.573   3
  -2   4  -3 18343.5 256.337   6
  -2  -4  -3 17685.0 321.537   2
  -2   4  -3 16447.2 313.905   7
   2  -4   3 18199.1 262.824   3
  -2  -4  -3 17360.2 322.437   1
   2  -4   3 18319.4 283.345   2
   2   4   3 17926.2 321.123   2
  -2   4  -3 18098.5 308.863   4
   2   4   4 21031.5 372.508   5
  -2  -4  -4 21148.9 370.033   2
   2  -4   4 21677.7 312.635   3
   2   4   4 20770.5 366.953   2
  -2   4  -4 20854.3 312.970   3
  -2  -4  -4 20772.3 368.208   1
  -2   4  -4 21164.5 350.225   4
   2  -4   4 21055.3 346.164   4
  -2   4  -4 21152.7 299.090   6
  -2   4  -5 44872.5 605.433   3
   2  -4   5 43863.6 628.410   4
   2   4   5 42485.0 658.583   2
   2  -4   5 46054.3 604.428   3
   2  -4   5 44696.2 628.468   2
  -2   4  -5 43632.6 634.642   4
  -2  -4  -5 43912.7 665.452   2
   2  -4   6 71586.1 925.828   3
  -2  -4  -6 71381.0 988.008   2
  -2   4  -6 71277.7 926.196   3
   2  -4   6 70546.8 942.294   4
   2  -4   6 71555.3 954.107   2
   2   4   6 68183.2 983.833   2
   2  -4   7 21935.5 396.334   2
   2  -4   7 21293.2 377.885   4
  -2  -4  -7 20767.6 415.438   2
  -2   4  -7 20690.8 370.402   3
   2  -4   8 108051. 1364.03   6
  -2  -4  -8 106357. 1440.02   2
  -2   4  -8 106076. 1380.80   3
   2  -4   8 106990. 1379.48   4
   2  -4   9 12848.7 287.671   6
   2  -4   9 13237.5 293.843   4
  -2  -4  -9 12547.4 326.594   2
  -2   4  -9 12344.2 292.427   3
  -2  -4 -10 40809.1 716.060   2
   2  -4  10 41609.7 659.571   4
  -2   4 -10 42245.5 677.249   3
   2  -4  10 40409.4 659.585   6
   2  -4  11 10185.1 270.927   4
  -2  -4 -11 10059.7 308.370   2
  -2   4 -11 10062.8 281.729   3
   2  -4  12 17929.3 395.812   4
  -2  -4 -12 18457.9 451.129   2
  -2   4 -12 18241.1 419.650   3
  -2  -4 -13 4562.81 220.027   2
   2  -4  13 4004.31 177.291   4
  -2   4 -13 4497.75 201.188   3
  -2  -4 -14-6.72480 62.3745   3
  -2   4 -14 13.8825 49.3308   3
  -2  -4 -14-8.93496 55.7513   2
   2  -4  14 71.4320 50.9575   4
   2  -4  15 1164.59 103.177   4
  -2   4 -15 1361.86 125.115   3
  -2  -4 -15 1180.51 124.695   3
   2  -4  16 5086.15 221.490   4
  -2   4 -16 5046.73 239.570   3
  -2  -4 -16 5004.28 248.464   3
  -2   4 -17 1388.10 134.914   3
  -2  -4 -17 1912.38 163.290   3
   2  -4  17 2041.52 147.346   4
  -2  -4 -18 16052.9 494.727   3
   2  -4  18 16816.2 451.943   4
  -2   4 -18 16314.6 482.202   3
  -2  -4 -19 3327.74 229.555   3
   2  -4  19 3636.33 207.247   4
  -2   4 -19 3767.53 233.445   3
  -2   4 -20 16141.3 509.908   3
  -2  -4 -20 14977.3 505.172   3
   2  -4  20 15806.9 462.443   4
  -2   4 -21 2358.03 201.882   3
  -2  -4 -21 2164.37 197.817   3
   2  -4  21 1955.70 162.218   4
  -2  -4 -22 7875.61 379.177   3
  -2   4 -22 7989.80 379.663   3
   2  -4  22 7057.76 313.162   4
  -2   4 -23 1784.67 189.145   3
   2   5 -24 337.934 99.3109   3
  -2  -5  24 483.466 110.221   4
   2  -5 -23 5430.78 313.748   3
  -2  -5  23 5701.23 319.540   4
   2   5 -23 4995.11 305.969   3
   2   5 -22 5011.03 294.759   3
   2  -5 -22 5379.85 305.004   3
  -2  -5  22 5565.05 307.248   4
  -2  -5  21 8507.94 370.305   4
   2  -5 -21 8464.38 369.996   3
   2   5 -21 7788.96 360.867   3
   2  -5 -20 1684.80 164.331   3
  -2  -5  20 1855.52 170.861   4
   2   5 -20 1822.13 175.984   3
   2  -5 -19 8509.89 346.546   3
  -2  -5  19 8733.81 356.225   4
   2   5 -19 8517.55 349.092   3
   2   5 -18 3935.67 227.209   3
   2  -5 -18 4058.14 234.786   3
  -2  -5  18 4499.41 244.061   4
  -2  -5  17 3879.87 221.951   4
   2   5 -17 3871.17 217.510   3
   2  -5 -17 3646.99 210.172   3
   2  -5 -16 4038.89 211.923   3
  -2  -5  16 4323.24 228.289   4
   2   5 -16 3898.95 213.698   3
  -2  -5  15-45.9978 60.0230   4
   2  -5 -15 78.0890 55.2024   3
   2   5 -15 13.4005 53.7632   3
   2   5 -14 4892.86 221.333   3
   2  -5 -14 4642.56 212.663   3
  -2  -5  14 4593.05 220.845   4
   2  -5 -13 3890.47 185.238   3
  -2  -5  13 3721.91 192.495   4
   2   5 -13 3977.43 187.246   3
   2   5 -12-12.6051 46.9268   3
  -2  -5  12-6.12933 51.3421   4
   2  -5 -12 39.0584 44.1558   3
   2   5 -11 21805.2 446.180   6
   2  -5 -11 21019.6 385.880   1
   2  -5 -11 21406.9 445.290   3
   2   5 -11 20727.5 446.336   3
  -2  -5  11 21206.6 468.327   4
  -2  -5  10 77.8752 43.6271   4
   2  -5 -10 82.4164 42.1473   3
   2  -5 -10 54.0992 30.3780   1
   2   5 -10 41.9210 41.1005   3
   2   5 -10 19.9439 42.8869   6
   2  -5  -9 68091.6 970.486   3
   2  -5  -9 67708.0 917.677   1
   2   5  -9 68474.1 975.406   6
   2   5  -9 67120.0 980.645   3
  -2  -5   9 67232.1 1003.84   4
   2  -5  -8 1611.42 94.4898   3
  -2   5   8 1625.32 93.2386   2
   2  -5  -8 1724.19 85.5443   1
  -2  -5   8 1593.52 105.393   4
   2   5  -8 1596.12 99.8167   3
   2   5  -8 1702.20 100.949   6
  -2   5   7 48276.1 693.815   2
   2   5  -7 47981.4 713.089   6
  -2  -5   7 48997.4 738.485   4
  -2   5   7 48009.2 678.085   1
  -2  -5   7 47744.5 715.910   3
   2   5  -7 46001.4 709.460   3
   2   5  -7 45645.6 692.451   7
  -2  -5   6 1255.31 79.8019   5
  -2   5   6 1262.54 74.8160   1
  -2   5   6 1252.51 70.7921   2
   2   5  -6 1198.90 78.9635   3
   2   5  -6 1220.87 74.9698   7
  -2  -5   6 1153.86 84.7202   4
  -2  -5   6 1156.83 77.3452   3
   2  -5  -6 1228.86 70.5515   2
  -2  -5   5 4279.42 140.079   5
  -2   5   5 4053.16 119.251   2
  -2   5   5 4304.84 132.923   1
   2   5  -5 4005.89 140.180   3
  -2  -5   5 4076.28 148.009   4
  -2  -5   5 3981.30 138.805   3
   2   5  -5 4531.01 144.034   5
   2  -5  -5 4187.48 118.959   2
   2   5  -5 4062.21 124.483   1
   2   5  -5 4257.46 135.521   7
   2   5  -4 162.919 41.5576   1
   2   5  -4 102.018 37.3715   5
   2  -5  -4 222.966 39.8756   7
  -2  -5   4 156.938 35.6345   5
   2   5  -4 197.865 40.6137   7
   2   5  -4 84.3860 34.8283   3
  -2  -5   4 174.383 37.8899   7
   2  -5  -4 140.451 25.4029   2
  -2   5   4 206.587 40.9229   1
  -2  -5   4 186.704 39.6170   3
  -2  -5   4 157.762 37.5985   4
   2   5  -4 189.585 37.9673   4
  -2   5   4 197.170 28.8479   2
  -2  -5   3 141.674 32.7638   5
  -2   5   3 148.341 39.5050   1
   2  -5  -3 260.218 31.8220   2
  -2  -5   3 159.285 37.3855   3
  -2  -5   3 153.928 37.5139   4
   2   5  -3 133.190 31.6659   7
   2   5  -3 111.052 36.3035   3
   2   5  -3 173.062 36.9277   5
  -2  -5   3 174.951 39.2662   7
   2  -5  -3 155.451 36.2860   7
   2   5  -3 131.922 37.6650   1
  -2   5   3 145.631 22.9685   2
   2   5  -3 185.183 40.1479   4
  -2   5   2 4630.04 95.7058   5
   2  -5  -2 4526.83 131.099   7
  -2   5   2 4329.44 84.8412   2
  -2  -5   2 4527.81 134.254   5
  -2  -5   2 4667.13 139.794   3
   2   5  -2 4613.37 135.010   5
   2   5  -2 4484.35 137.697   3
  -2  -5   2 4467.54 133.876   7
  -2  -5   2 4697.09 144.732   4
   2  -5  -2 4396.86 87.7114   2
   2   5  -2 5341.55 146.089   1
   2   5  -2 4305.74 138.703   4
   2   5  -2 4542.10 132.907   7
  -2  -5   1 49850.3 707.104   3
  -2   5   1 49755.5 695.141   7
  -2   5   1 51574.4 614.590   5
   2  -5  -1 49606.6 603.690   2
  -2  -5   1 51846.9 704.112   5
   2   5  -1 52148.6 700.707   5
   2   5  -1 52924.0 709.671   1
  -2  -5   1 52126.5 701.979   7
  -2  -5   1 50735.9 704.785   1
   2   5  -1 51816.8 712.010   4
  -2  -5   1 53230.2 698.488   2
   2  -5  -1 51632.7 699.858   7
   2   5   0 49.2327 33.9302   5
   2   5   0 244.582 55.7520   1
   2  -5   0 68.2408 14.0028   5
  -2   5   0 38.1279 12.8673   5
   2  -5   0 47.8522 13.8990   3
  -2  -5   0 42.8250 31.3241   7
  -2  -5   0 31.5888 30.5371   2
   2   5   0 46.0032 31.5766   4
  -2  -5   0 208.124 55.0207   1
  -2  -5   0 62.6044 29.0585   5
   2  -5   0 26.7462 30.7543   7
  -2  -5   0-2.74137 31.1282   3
  -2   5   0 45.0683 26.7925   7
   2  -5   0 31.3971 9.55534   2
   2   5   1 124715. 1546.92   2
  -2   5  -1 125787. 1556.39   4
   2  -5   1 126689. 1459.31   5
  -2   5  -1 126541. 1556.01   7
  -2  -5  -1 130426. 1554.48   2
   2   5   1 126840. 1556.09   5
   2   5   1 125686. 1550.50   4
   2  -5   1 127571. 1461.42   3
   2   5   1 125555. 1568.74   1
  -2  -5  -1 124676. 1566.73   1
  -2  -5  -1 122640. 1557.19   5
   2  -5   1 126692. 1555.44   7
   2   5   2 5450.24 153.128   2
   2   5   2 5381.52 156.125   5
  -2  -5  -2 5458.02 162.994   1
  -2   5  -2 5030.01 151.683   7
  -2   5  -2 5428.27 152.711   4
  -2   5  -2 5528.79 107.709   3
   2  -5   2 5626.09 106.887   3
   2  -5   2 5526.78 109.309   5
  -2  -5  -2 5547.12 155.150   2
  -2  -5  -3 63874.0 872.627   2
  -2  -5  -3 63221.7 881.143   1
   2   5   3 64423.1 877.229   5
   2  -5   3 65481.8 790.652   3
  -2   5  -3 64353.4 790.449   3
  -2   5  -3 64016.2 863.676   4
   2  -5   3 63483.9 795.367   5
   2   5   3 64752.2 869.520   2
  -2   5  -3 61933.9 871.424   7
   2  -5   4 3847.12 131.906   4
  -2   5  -4 3800.36 98.0252   6
   2   5   4 3420.71 130.841   2
  -2  -5  -4 3610.68 135.493   2
   2   5   4 3589.15 135.684   5
   2  -5   4 3551.32 98.5438   3
   2  -5   4 3781.97 105.387   5
  -2   5  -4 3847.41 130.934   4
  -2   5  -4 3805.26 102.319   3
  -2  -5  -4 3874.31 139.419   1
  -2   5  -4 3468.88 130.851   7
  -2   5  -5 38013.6 517.404   6
   2   5   5 36774.8 593.233   2
   2  -5   5 37426.0 575.296   4
   2  -5   5 38394.4 558.777   2
  -2   5  -5 38232.8 532.897   3
  -2   5  -5 37985.4 582.907   4
   2   5   5 37878.6 603.777   5
  -2  -5  -5 37588.6 599.219   2
   2  -5   5 38326.8 531.803   3
  -2   5  -6 47.8425 30.2487   3
   2  -5   6 48.1668 37.2242   4
   2  -5   6 14.5386 24.0119   3
  -2  -5  -6 40.8772 40.2405   2
   2  -5   6 18.1437 30.3742   2
  -2   5  -6 64.2268 25.7509   6
  -2   5  -7 19143.2 346.637   3
  -2  -5  -7 18698.2 391.480   2
   2  -5   7 18873.0 340.187   3
   2  -5   7 18495.9 364.963   2
   2  -5   7 18903.0 362.363   4
   2  -5   8 254.736 48.1655   4
   2  -5   8 213.815 39.7831   3
  -2   5  -8 270.030 43.4822   3
  -2  -5  -8 291.983 58.7342   2
  -2   5  -9 1846.10 105.255   3
   2  -5   9 1822.77 105.650   4
  -2  -5  -9 1698.30 120.729   2
  -2   5 -10 7663.60 232.638   3
  -2  -5 -10 7858.91 264.000   2
   2  -5  10 7826.00 234.048   4
  -2  -5 -11 9386.94 301.039   2
   2  -5  11 9113.76 263.526   4
  -2   5 -11 9179.95 270.758   3
   2  -5  12 1050.27 94.9016   4
  -2  -5 -12 1168.95 117.334   2
  -2   5 -12 1130.85 103.096   3
  -2   5 -13 23437.7 509.623   3
  -2  -5 -13 23610.3 547.013   2
   2  -5  13 23242.1 489.894   4
  -2   5 -14 4908.46 220.004   3
  -2  -5 -14 4823.95 239.546   2
  -2  -5 -14 5651.90 248.128   3
   2  -5  14 4978.98 209.191   4
  -2   5 -15 15422.7 431.313   3
  -2  -5 -15 16617.2 461.608   3
   2  -5  15 16180.1 412.904   4
  -2  -5 -16 6930.52 297.077   3
   2  -5  16 6513.08 256.388   4
  -2   5 -16 6574.84 279.797   3
   2  -5  17 4359.86 215.083   4
  -2   5 -17 4169.41 228.102   3
  -2  -5 -17 4124.41 235.473   3
  -2  -5 -18 1794.29 168.197   3
  -2   5 -18 1668.14 154.187   3
   2  -5  18 2025.65 154.516   4
  -2   5 -19 41.3132 63.7378   3
   2  -5  19 166.102 68.2401   4
  -2  -5 -19 188.531 85.2144   3
   2  -5  20 10.9839 53.7815   4
  -2   5 -20-13.2098 68.3367   3
  -2   5 -21 643.569 122.016   3
  -2  -5 -21 506.294 112.338   3
   2  -5  21 551.591 106.991   4
  -2  -5 -22 26.1792 77.1924   3
  -2   5 -22 118.304 73.1459   3
   2  -5  22 237.072 80.9085   4
  -2   5 -23 7965.87 385.785   3
  -2  -6  24 1591.87 176.593   4
   2  -6 -23 2385.92 214.520   3
   2   6 -23 2133.58 206.298   3
  -2  -6  23 2044.99 196.822   4
   2  -6 -22 1237.43 148.986   3
   2   6 -22 1512.60 173.686   3
  -2  -6  22 1553.74 173.517   4
   2   6 -21 343.956 108.196   3
  -2  -6  21 311.601 96.4107   4
   2  -6 -21 308.320 97.2612   3
   2  -6 -20 273.984 91.6746   3
   2   6 -20 374.055 97.6348   3
  -2  -6  20 412.352 102.899   4
   2   6 -19 1084.44 127.885   3
   2  -6 -19 1033.58 131.548   3
  -2  -6  19 1035.87 132.880   4
   2  -6 -18 2634.71 190.275   3
   2   6 -18 2695.55 197.228   3
  -2  -6  18 2736.02 197.128   4
   2  -6 -17 7548.62 306.770   3
  -2  -6  17 7460.68 315.730   4
   2   6 -17 7173.00 303.556   3
   2  -6 -16 19651.4 504.137   3
  -2  -6  16 19000.8 510.554   4
   2   6 -16 18993.7 500.212   3
   2  -6 -15 26450.1 580.395   3
  -2  -6  15 24659.3 587.565   4
   2   6 -15 26011.1 583.785   3
  -2  -6  14 16141.0 440.965   4
   2   6 -14 17368.0 440.201   3
   2  -6 -14 16487.3 427.573   3
  -2  -6  13 32141.5 658.211   4
   2   6 -13 34068.1 651.084   3
   2  -6 -13 33258.6 640.028   3
   2   6 -12 10342.0 299.006   6
   2   6 -12 9900.64 302.571   3
  -2  -6  12 9585.75 311.104   4
   2  -6 -12 10264.9 302.010   3
   2   6 -11 8915.78 273.043   3
   2  -6 -11 8987.74 271.891   3
   2   6 -11 9078.62 270.120   6
  -2  -6  11 9246.36 294.566   4
   2   6 -10 16708.0 375.216   6
  -2  -6  10 16366.6 396.578   4
   2  -6 -10 16284.1 371.851   3
   2   6 -10 17161.8 384.278   3
  -2  -6   9 2324.61 134.988   4
   2  -6  -9 2175.45 118.101   3
   2   6  -9 2113.53 118.544   6
   2   6  -9 2004.49 117.738   3
   2   6  -8 3103.56 142.946   3
  -2  -6   8 3246.90 155.369   4
  -2   6   8 2798.70 122.695   2
   2   6  -8 3022.48 136.180   6
   2   6  -7 330.219 54.6183   3
   2  -6  -7 249.902 42.5740   2
  -2  -6   7 336.331 64.0699   4
  -2   6   7 212.917 37.6849   2
  -2   6   7 240.699 46.0733   1
  -2  -6   6 2587.76 131.073   4
   2   6  -6 2763.31 126.463   3
   2   6  -6 2667.31 109.392   1
   2  -6  -6 2530.04 101.597   2
  -2  -6   6 2621.23 117.259   3
  -2   6   6 2664.93 115.831   1
  -2   6   6 2606.74 102.511   2
  -2  -6   5 36707.5 573.268   3
  -2   6   5 36477.2 521.086   2
   2   6  -5 37397.9 555.504   1
  -2   6   5 36320.4 562.831   1
  -2  -6   5 36400.1 597.593   4
   2  -6  -5 36544.9 520.700   2
  -2  -6   5 35448.9 565.424   5
   2  -6  -5 36642.3 565.480   7
   2   6  -5 36620.5 574.767   3
   2   6  -5 37107.9 569.661   5
   2   6  -4 399.993 52.4535   5
  -2  -6   4 353.780 47.6586   5
  -2  -6   4 383.927 47.6528   3
   2   6  -4 336.711 50.6651   3
   2  -6  -4 278.210 32.4365   2
  -2  -6   4 458.906 58.7562   4
  -2  -6   4 296.427 47.0475   7
  -2   6   4 328.593 49.3122   1
   2   6  -4 314.116 45.0727   1
  -2   6   4 354.613 38.7859   5
  -2   6   4 358.490 33.6979   2
   2  -6  -4 546.429 56.0809   7
   2   6  -4 310.250 43.4664   7
   2  -6  -3 47640.8 605.904   2
  -2   6   3 46791.6 685.436   1
   2   6  -3 48208.8 709.080   4
  -2  -6   3 47649.4 685.779   7
   2   6  -3 47327.0 681.010   1
  -2  -6   3 47887.0 709.866   4
   2   6  -3 46583.9 677.334   5
   2  -6  -3 46693.7 679.822   7
  -2   6   3 48077.0 618.756   5
  -2  -6   3 46959.8 679.560   5
   2   6  -3 46118.0 681.515   7
   2   6  -3 45376.7 682.371   3
  -2   6   3 48005.3 602.338   2
  -2  -6   3 48446.3 689.692   3
   2   6  -2 2703.61 112.508   1
   2  -6  -2 2719.44 110.012   7
  -2  -6   2 2796.50 113.571   7
   2  -6  -2 2835.16 71.7431   2
  -2  -6   2 2832.52 110.725   5
   2   6  -2 2670.27 115.536   4
  -2   6   2 2827.27 77.8931   5
   2   6  -2 2819.87 110.391   5
  -2  -6   2 2797.88 112.532   3
  -2   6   2 2864.99 117.025   1
   2   6  -2 2731.40 110.563   7
  -2  -6   1 14747.7 288.379   5
   2  -6  -1 15008.6 232.343   3
  -2   6   1 14494.7 287.401   7
   2  -6  -1 14493.9 288.778   7
  -2   6   1 14842.4 218.575   5
  -2  -6   1 15278.4 295.726   7
  -2  -6   1 14251.1 279.095   2
  -2  -6   1 14508.9 291.080   3
   2   6  -1 14649.5 295.194   1
   2   6  -1 14836.0 285.207   5
   2   6  -1 14574.6 298.492   4
   2  -6  -1 14193.8 208.744   2
   2   6   0 1068.50 70.2032   5
  -2  -6   0 1302.19 77.3795   3
   2  -6   0 1091.66 45.3644   3
   2  -6   0 1108.00 74.6695   7
  -2   6   0 1151.61 73.8776   7
  -2  -6   0 1180.67 71.2657   2
   2   6   0 1191.60 79.0551   1
   2  -6   0 1098.30 39.0183   2
   2  -6   0 1136.48 44.0719   5
  -2  -6   0 1124.37 74.5936   7
  -2   6   0 1147.20 43.0247   5
   2   6   0 1162.39 76.8606   4
  -2  -6   0 971.760 68.7791   1
  -2  -6   0 1140.84 72.9371   5
  -2  -6  -1 15781.3 318.061   7
  -2   6  -1 16743.0 326.104   4
   2  -6   1 16084.5 240.907   5
   2   6   1 16642.1 314.436   5
  -2  -6  -1 15501.9 321.929   1
  -2  -6  -1 15731.1 307.463   2
  -2   6  -1 16327.1 317.707   7
   2  -6   1 16038.9 318.415   7
   2   6   1 17250.8 325.397   4
   2  -6   1 16753.7 245.335   3
   2   6   1 16791.5 329.940   1
   2   6   2 15.7349 27.6036   2
   2  -6   2 17.1806 16.1268   3
   2  -6   2 4.93223 15.7183   5
  -2   6  -2 8.61814 33.6376   4
  -2  -6  -2 1.20272 31.8463   2
   2   6   2 1.13494 38.5903   5
   2  -6   3 12655.7 208.560   3
   2   6   3 12149.8 270.570   5
  -2  -6  -3 12411.2 269.974   2
  -2   6  -3 12329.0 209.248   3
   2  -6   3 11833.9 208.453   5
   2   6   3 11883.9 264.646   2
  -2   6  -3 11730.9 265.294   4
  -2  -6  -4 2547.86 116.098   2
   2   6   4 2390.46 116.641   5
  -2   6  -4 2648.90 87.9645   3
   2  -6   4 2437.54 83.1372   3
  -2   6  -4 2543.35 114.013   4
   2   6   4 2505.69 114.453   2
   2  -6   4 2504.28 86.4194   5
   2  -6   5 18907.5 366.939   4
  -2  -6  -5 19104.2 377.914   2
   2  -6   5 19175.2 314.786   3
   2  -6   5 18831.3 321.517   5
  -2   6  -5 19147.1 309.186   6
   2   6   5 19505.7 385.775   5
  -2   6  -5 18133.3 312.503   3
  -2  -6  -6 11967.0 294.711   2
   2   6   6 12516.7 304.153   5
  -2   6  -6 12846.4 239.795   6
   2  -6   6 12047.4 266.811   2
   2  -6   6 12172.3 252.625   5
  -2   6  -6 12373.9 249.030   3
   2  -6   6 12605.8 247.264   3
   2  -6   6 12309.8 284.523   4
   2  -6   7 49296.1 723.032   2
  -2   6  -7 48100.2 694.462   3
   2  -6   7 47214.1 731.663   4
  -2  -6  -7 48987.7 765.894   2
   2  -6   7 48536.5 701.916   5
   2  -6   7 49230.4 691.060   3
   2   6   7 47932.1 767.381   5
  -2   6  -7 45400.4 664.004   6
  -2   6  -8 33206.5 541.960   3
   2  -6   8 34277.6 541.925   3
  -2  -6  -8 33980.9 607.876   2
   2  -6   8 33020.8 571.354   4
  -2  -6  -9 25256.8 514.424   2
  -2   6  -9 24890.2 460.586   3
   2  -6   9 25672.0 484.325   4
  -2   6 -10 7634.32 230.086   3
  -2  -6 -10 7025.17 254.340   2
   2  -6  10 7029.67 229.546   4
   2  -6  11 27576.0 532.088   4
  -2   6 -11 27571.0 527.264   3
  -2  -6 -11 27262.5 571.768   2
  -2   6 -12 959.093 95.5417   3
  -2  -6 -12 1025.71 113.907   2
   2  -6  12 1152.01 102.142   4
   2  -6  13 38.6835 50.9925   4
  -2  -6 -13-37.9977 62.5840   2
  -2   6 -13 12.0304 47.7179   3
  -2  -6 -14 166.569 76.9496   2
   2  -6  14 128.818 55.1779   4
  -2   6 -14 50.5538 43.8996   3
  -2  -6 -15 228.553 83.3792   2
   2  -6  15 280.144 69.8307   4
  -2   6 -15 204.048 60.0013   3
  -2  -6 -15 277.653 78.0306   3
  -2   6 -16 5369.22 251.701   3
  -2  -6 -16 5554.59 270.745   3
   2  -6  16 5673.94 245.003   4
  -2  -6 -17 9706.83 374.763   3
  -2   6 -17 9332.64 352.075   3
   2  -6  17 9946.18 339.536   4
  -2  -6 -18 3124.23 215.349   3
   2  -6  18 3362.60 203.227   4
  -2   6 -18 3316.05 212.481   3
  -2  -6 -19 16222.5 522.153   3
   2  -6  19 16857.1 480.034   4
  -2   6 -19 16101.3 502.535   3
  -2   6 -20 3779.70 248.853   3
  -2  -6 -20 3950.94 262.125   3
   2  -6  20 3790.80 224.660   4
  -2   6 -21 9091.30 393.271   3
   2  -6  21 10066.5 380.214   4
  -2  -6 -21 9517.58 415.881   3
  -2   6 -22 5010.42 306.643   3
   2  -6  22 5701.40 294.145   4
  -2   6 -23 2461.90 221.057   3
   2   7 -23-84.0362 91.1545   3
  -2  -7  23 23.7101 67.8929   4
   2   7 -22 3726.40 261.911   3
   2  -7 -22 4207.08 269.964   3
  -2  -7  22 3811.32 261.687   4
  -2  -7  21 340.944 102.312   4
   2  -7 -21 377.172 99.4774   3
   2   7 -21 374.272 110.693   3
   2  -7 -20 7812.17 352.821   3
   2   7 -20 7744.28 354.634   3
  -2  -7  20 8138.29 363.778   4
   2   7 -19 502.283 102.295   3
  -2  -7  19 803.889 128.877   4
   2  -7 -19 531.485 97.7434   3
   2  -7 -18 8489.05 342.171   3
   2   7 -18 8634.61 352.642   3
  -2  -7  18 8500.41 350.965   4
   2   7 -17 483.232 89.9932   3
   2  -7 -17 550.080 93.9341   3
  -2  -7  17 261.997 68.7298   4
   2   7 -16 724.784 106.500   3
  -2  -7  16 929.608 116.738   4
   2  -7 -16 638.708 94.4011   3
   2  -7 -15 69.3217 57.9292   3
  -2  -7  15 95.1379 59.1156   4
   2   7 -15 69.1950 55.3442   3
   2  -7 -14 2988.86 175.760   3
  -2  -7  14 3289.82 192.598   4
   2   7 -14 2913.41 175.285   3
   2   7 -13 961.552 100.269   3
   2   7 -13 1027.14 101.829   6
   2  -7 -13 1227.89 113.183   3
  -2  -7  13 995.962 110.026   4
   2  -7 -12 38529.2 696.242   3
   2   7 -12 37674.7 695.799   3
   2   7 -12 38612.6 686.302   6
  -2  -7  12 37432.7 721.117   4
   2   7 -11 359.504 63.1399   6
  -2  -7  11 298.662 64.6468   4
   2   7 -11 357.120 63.5911   3
   2  -7 -11 333.311 67.5912   3
   2   7 -10 28115.2 533.481   6
  -2  -7  10 27228.4 560.627   4
   2   7 -10 27728.6 538.262   3
   2  -7 -10 27888.1 529.863   3
  -2  -7   9 87.1635 47.0729   4
   2   7  -9 142.874 56.7704   6
   2   7  -9 75.0521 44.4363   3
  -2  -7   8 46344.6 758.747   4
  -2   7   8 45932.1 707.716   1
   2   7  -8 44638.1 717.715   6
   2  -7  -8 45144.0 692.059   2
   2   7  -8 45040.6 725.825   3
   2   7  -8 45473.9 681.603   1
  -2   7   8 43969.3 688.664   2
  -2   7   7 623.104 65.3073   1
   2   7  -7 542.075 57.3247   1
   2   7  -7 562.295 67.1821   3
  -2  -7   7 662.194 80.0318   4
   2  -7  -7 583.653 58.0156   2
  -2   7   7 530.001 55.9158   2
   2   7  -6 59352.3 852.697   3
   2  -7  -6 59533.7 849.935   7
  -2  -7   6 58102.8 882.324   4
   2   7  -6 56539.9 824.918   1
   2   7  -6 58850.2 842.801   5
  -2   7   6 56567.8 791.186   2
   2  -7  -6 57728.5 793.619   2
  -2   7   6 58186.5 842.223   1
   2  -7  -5 8624.18 226.912   7
   2  -7  -5 8082.58 186.357   2
  -2   7   5 8157.60 194.490   5
  -2  -7   5 8576.22 245.765   4
  -2   7   5 8481.30 225.292   1
   2   7  -5 8129.55 217.858   5
   2   7  -5 8372.67 216.728   1
  -2   7   5 7999.16 181.662   2
   2   7  -5 8370.40 223.689   3
  -2  -7   5 8223.81 224.569   7
  -2  -7   4 10828.8 254.832   5
   2   7  -4 11081.6 255.301   5
  -2  -7   4 10960.6 259.027   3
  -2   7   4 11445.5 268.270   1
  -2  -7   4 11287.8 284.529   4
  -2   7   4 11337.3 222.360   5
  -2   7   4 11086.5 207.099   2
   2  -7  -4 11273.0 212.763   2
   2  -7  -4 11366.9 264.796   7
   2   7  -4 11349.2 267.788   3
  -2  -7   4 11178.0 263.367   7
   2   7  -4 11691.1 263.394   1
  -2  -7   3 11.3014 28.3147   3
   2   7  -3 21.9544 32.8357   3
  -2   7   3 23.0607 22.2292   5
  -2  -7   3 30.2596 27.4943   5
  -2  -7   3 54.4110 50.3219   4
  -2   7   3 29.6235 16.5458   2
   2   7  -3 27.6656 35.0045   1
   2  -7  -3 32.7490 39.6398   7
  -2  -7   3 25.6189 42.4693   7
   2  -7  -3 52.5830 18.4527   2
  -2   7   3 48.5794 40.5946   1
   2   7  -3 82.4793 40.6281   5
   2   7  -2 21378.2 381.899   5
   2   7  -2 22060.4 400.995   1
  -2  -7   2 21431.6 386.704   5
  -2   7   2 21508.3 318.070   5
  -2  -7   2 20453.1 391.218   3
   2  -7  -2 21633.2 394.448   7
  -2   7   2 21372.2 399.196   1
  -2  -7   2 21200.1 376.819   2
  -2  -7   2 21077.8 395.738   7
   2  -7  -2 21865.8 308.744   2
   2  -7  -1 50.7951 20.1529   3
  -2   7   1 24.7386 17.4884   5
  -2  -7   1 96.6308 34.0549   2
  -2  -7   1 104.620 44.8331   7
   2  -7  -1 62.3932 38.0365   7
   2   7  -1 33.2675 39.7205   1
  -2  -7   1-12.9266 31.0932   3
   2   7  -1-1.67266 32.8527   5
   2  -7  -1 19.9479 15.0626   2
  -2  -7   1 96.8076 36.6068   5
   2   7   0 33297.2 527.447   5
   2   7   0 35015.6 557.085   1
   2  -7   0 33699.9 543.661   7
  -2  -7   0 34206.3 545.995   3
   2  -7   0 32939.3 433.762   2
   2  -7   0 32775.4 446.726   5
  -2   7   0 34551.7 445.146   5
   2  -7   0 33332.8 456.636   3
  -2  -7   0 33422.4 545.971   7
  -2  -7   0 32802.9 524.862   2
  -2  -7   0 33460.7 535.383   5
   2  -7   1 18427.3 359.165   7
  -2  -7  -1 18538.8 352.396   5
  -2  -7  -1 18360.6 359.226   3
   2   7   1 18181.4 367.274   1
  -2  -7  -1 18246.5 345.807   2
  -2   7  -1 18241.5 272.225   5
  -2  -7  -1 17974.3 360.052   7
   2  -7   1 18116.1 265.974   2
   2  -7   1 18249.4 278.396   3
   2  -7   1 18353.0 274.544   5
   2   7   1 17529.6 341.589   5
   2   7   2 65753.2 942.859   1
  -2  -7  -2 66840.4 913.373   2
   2  -7   2 66002.8 821.065   5
   2   7   2 64757.9 913.709   5
   2   7   2 64109.6 902.787   2
  -2  -7  -2 66589.2 936.211   7
   2  -7   2 66626.9 824.050   3
  -2  -7  -3 25.0100 34.6774   2
   2  -7   3 6.06515 19.7728   5
   2   7   3-0.83142 29.4381   2
  -2   7  -3 34.9098 22.4239   3
   2   7   3 2.11647 38.4997   5
   2  -7   3 6.83995 17.6285   3
   2  -7   4 53755.2 723.659   5
   2   7   4 54790.2 812.104   5
   2  -7   4 55204.7 722.022   3
  -2   7  -4 55445.2 724.911   3
  -2  -7  -4 55143.9 808.620   2
   2  -7   5 425.813 42.8489   5
  -2  -7  -5 561.276 66.7768   2
   2  -7   5 372.675 38.6109   3
   2   7   5 331.606 59.6954   5
  -2   7  -5 407.266 42.4549   3
  -2   7  -5 395.046 41.2235   6
   2  -7   6 36608.8 554.810   5
   2  -7   6 36931.2 547.599   3
  -2   7  -6 37183.8 542.107   6
  -2  -7  -6 37328.6 626.959   2
   2   7   6 37759.2 635.907   5
  -2   7  -6 36501.6 550.195   3
  -2  -7  -7 466.829 68.5365   2
  -2   7  -7 444.983 48.6542   3
   2  -7   7 419.102 46.1236   3
  -2   7  -7 421.451 45.0882   6
   2  -7   7 465.061 51.5493   5
   2  -7   7 472.499 58.0471   2
   2  -7   7 410.168 67.0035   4
   2   7   7 280.280 65.5963   5
   2   7   8 20838.6 455.593   5
   2  -7   8 21008.8 385.773   3
  -2  -7  -8 20355.2 447.494   2
  -2   7  -8 20794.5 372.760   6
   2  -7   8 21055.3 434.996   4
  -2   7  -8 21356.6 393.912   3
  -2  -7  -9 2822.89 155.887   2
   2  -7   9 2692.27 143.425   4
  -2   7  -9 2826.47 130.265   3
   2   7   9 2537.15 151.714   5
   2  -7  10 2039.68 129.063   4
  -2  -7 -10 2184.03 141.417   2
  -2   7 -10 2133.12 119.452   3
  -2  -7 -11 4218.92 203.524   2
   2  -7  11 4325.63 190.579   4
  -2   7 -11 4221.18 179.822   3
  -2  -7 -12 33711.5 682.290   2
   2  -7  12 33573.2 637.070   4
  -2   7 -12 33261.7 625.431   3
   2  -7  13 742.200 89.4614   4
  -2  -7 -13 579.261 97.0623   2
  -2   7 -13 670.681 84.9296   3
  -2   7 -14 8584.28 299.559   3
  -2  -7 -14 8851.30 332.620   2
   2  -7  14 9229.48 306.548   4
  -2   7 -15 1032.90 113.199   3
  -2  -7 -15 1052.83 124.633   2
   2  -7  15 883.993 104.247   4
   2  -7  16 1134.83 112.974   4
  -2   7 -16 1041.31 116.426   3
  -2  -7 -16 1332.88 140.421   3
  -2  -7 -17 166.638 78.6693   3
  -2   7 -17 231.553 78.3614   3
   2  -7  17 290.188 74.9596   4
   2  -7  18 2752.44 187.533   4
  -2  -7 -18 2477.22 196.440   3
  -2   7 -18 2516.52 190.623   3
   2  -7  19 91.1731 58.4586   4
  -2   7 -19 10.7700 64.5298   3
  -2  -7 -19 226.716 78.2822   3
  -2   7 -20 433.624 106.413   3
  -2  -7 -20 559.500 110.405   3
   2  -7  20 533.474 99.9097   4
  -2  -7 -21 114.669 71.5521   3
   2  -7  21 50.6947 76.1727   4
  -2   7 -21 156.469 82.2167   3
  -2   7 -22 4257.63 279.747   3
   2   8 -23 1567.11 185.493   3
  -2  -8  22 1594.33 183.462   4
   2  -8 -22 1635.64 173.960   3
   2   8 -22 1911.08 193.864   3
   2   8 -21 31.6634 82.1397   3
  -2  -8  21-39.3966 77.8840   4
   2  -8 -21 67.6246 69.7237   3
  -2  -8  20-77.4762 90.9276   4
   2   8 -20 64.3898 82.4820   3
   2  -8 -20 78.8801 83.9990   3
   2  -8 -19 836.291 123.524   3
  -2  -8  19 1022.06 133.621   4
   2   8 -19 703.159 123.161   3
   2   8 -18 3096.63 216.579   3
  -2  -8  18 3077.74 213.425   4
   2  -8 -18 3082.69 208.080   3
   2  -8 -17 3474.63 214.375   3
  -2  -8  17 3153.16 212.192   4
   2   8 -17 3939.00 230.649   3
   2  -8 -16 10830.9 371.141   3
  -2  -8  16 10270.7 378.052   4
   2   8 -16 10431.3 366.568   3
  -2  -8  15 14079.1 436.499   4
   2   8 -15 14754.2 428.717   3
   2  -8 -15 14232.9 418.153   3
   2   8 -14 21560.3 519.832   3
   2  -8 -14 21532.2 513.145   3
  -2  -8  14 21629.7 543.546   4
   2   8 -13 21924.8 495.025   6
   2   8 -13 21310.6 505.540   3
   2  -8 -13 22743.7 511.822   3
  -2  -8  13 22081.5 534.389   4
   2  -8 -12 20279.8 468.331   3
   2   8 -12 19999.2 470.616   3
  -2  -8  12 20189.7 494.884   4
   2   8 -12 20552.5 462.058   6
   2   8 -11 13351.9 350.084   6
   2  -8 -11 13021.6 348.286   3
   2   8 -11 13151.6 356.411   3
  -2  -8  11 13485.2 381.296   4
  -2  -8  10 10437.4 322.546   4
   2   8 -10 10712.9 306.066   3
   2   8 -10 10647.1 301.243   6
  -2  -8   9 6400.91 240.979   4
   2  -8  -9 5863.93 197.940   2
   2   8  -9 6220.92 198.645   1
   2   8  -9 6178.45 215.525   6
   2   8  -9 6099.95 218.962   3
   2   8  -8 3203.72 155.096   3
  -2   8   8 3236.06 149.460   1
  -2   8   8 3319.70 137.915   2
   2  -8  -8 3269.54 138.225   2
   2   8  -8 3394.83 144.534   1
  -2  -8   8 3345.25 170.587   4
  -2   8   7 1779.60 110.211   1
   2   8  -7 1757.98 109.747   3
   2  -8  -7 1941.59 115.626   7
  -2   8   7 1688.09 98.6746   5
   2   8  -7 1847.68 106.863   1
   2  -8  -7 1698.69 94.9583   2
  -2   8   7 1727.24 92.9319   2
  -2  -8   7 1732.37 121.746   4
   2  -8  -6 131.477 43.4177   7
  -2   8   6 213.631 54.3443   1
  -2  -8   6 69.9672 53.5822   4
   2   8  -6 106.284 40.6666   5
   2   8  -6 84.9236 42.8261   1
   2   8  -6 100.621 43.8331   3
  -2   8   6 155.304 41.5571   5
  -2   8   6 121.645 31.2417   2
   2  -8  -6 155.433 36.5502   2
  -2   8   5 1945.52 110.884   1
  -2  -8   5 2228.20 120.371   7
   2  -8  -5 2081.71 116.558   7
   2   8  -5 1904.31 107.736   1
   2   8  -5 1919.44 108.610   3
  -2   8   5 2018.76 85.7097   2
   2  -8  -5 2028.77 89.9543   2
   2   8  -5 2027.60 109.857   5
  -2  -8   5 2149.71 130.980   4
  -2   8   5 2057.71 94.3004   5
  -2   8   4 10396.3 218.491   5
   2   8  -4 9911.82 249.751   5
   2   8  -4 10499.8 263.391   3
  -2  -8   4 10202.3 265.442   7
   2  -8  -4 10973.7 211.988   2
  -2  -8   4 9710.57 276.792   4
  -2   8   4 10116.6 200.919   2
  -2   8   4 10402.1 268.530   1
   2   8  -4 10776.6 267.387   1
   2  -8  -4 10300.0 264.041   7
  -2  -8   3 4593.76 156.461   2
  -2  -8   3 4735.51 172.229   7
   2   8  -3 4436.02 165.432   1
   2   8  -3 4557.91 158.117   5
   2  -8  -3 4553.13 118.101   2
  -2   8   3 4401.60 123.201   5
   2  -8  -3 4362.80 163.108   7
  -2   8   3 4571.24 169.956   1
   2  -8  -2 7154.15 212.912   7
   2   8  -2 6800.84 209.856   1
  -2   8   2 7182.51 153.829   5
  -2  -8   2 6710.66 208.037   7
  -2   8   2 7118.93 214.348   1
  -2  -8   2 6951.78 195.095   2
   2  -8  -2 6837.99 142.599   2
   2   8  -2 6656.08 193.460   5
   2  -8  -2 7306.89 169.952   3
   2  -8  -1 158.098 23.2213   2
   2   8  -1 239.796 44.9908   5
  -2   8   1 248.988 53.9757   1
   2   8  -1 193.966 51.8825   1
   2  -8  -1 203.974 32.3052   3
  -2  -8   1 359.312 58.7993   7
  -2   8   1 105.519 24.5562   5
  -2  -8   1 158.591 41.6758   2
   2  -8  -1 110.277 37.5898   7
  -2  -8   0 1572.69 103.196   7
   2   8   0 1613.19 94.4649   5
   2  -8   0 1642.25 59.2799   2
   2   8   0 1602.50 103.611   1
  -2   8   0 1741.75 64.7461   5
   2  -8   0 1396.81 65.0829   3
  -2  -8   0 1670.55 94.5933   2
   2  -8   0 1738.56 103.572   7
   2   8   1 1447.40 100.457   1
   2  -8   1 1396.57 61.0103   3
   2   8   1 1329.15 88.9034   5
  -2   8  -1 1311.32 57.4549   5
   2  -8   1 1385.20 96.5022   7
   2  -8   1 1328.42 58.1888   5
  -2  -8  -1 1264.84 94.0457   7
  -2  -8  -1 1188.39 81.8809   2
   2  -8   1 1296.11 54.2939   2
   2  -8   2 30.4067 17.8848   5
  -2  -8  -2 61.4520 49.1058   7
   2  -8   2 18.6146 19.9790   3
  -2  -8  -2 10.5485 37.1083   2
   2   8   2 72.3908 50.7833   1
   2  -8   2-51.4105 42.9408   7
   2   8   2 43.9264 37.5710   5
  -2  -8  -3 5746.40 185.418   2
   2  -8   3 5355.82 134.618   5
   2   8   3 5596.34 185.907   5
  -2  -8  -3 5375.89 193.631   7
   2  -8   3 5199.16 136.139   3
   2   8   4 5402.68 189.342   5
   2  -8   4 5395.48 142.986   5
  -2  -8  -4 5702.59 191.478   2
  -2   8  -4 5374.51 145.413   3
   2  -8   4 5484.03 143.711   3
   2  -8   5 25614.6 411.750   5
   2  -8   5 25258.3 405.819   3
  -2   8  -5 25867.8 410.988   3
   2   8   5 25511.7 487.749   5
  -2  -8  -5 24497.1 477.244   2
  -2   8  -6 21946.9 374.217   6
  -2   8  -6 21918.1 380.469   3
   2  -8   6 21536.7 380.894   5
   2  -8   6 21640.0 375.875   3
  -2  -8  -6 22793.9 453.187   2
   2   8   6 21290.2 448.326   5
  -2   8  -7 11564.2 249.436   6
   2  -8   7 11069.9 257.854   5
  -2  -8  -7 11374.8 308.863   2
   2  -8   7 11143.3 250.703   3
   2   8   7 11639.2 316.329   5
  -2   8  -7 11375.2 257.319   3
  -2  -8  -8 24205.4 504.095   2
   2   8   8 24336.4 512.363   5
  -2   8  -8 23525.1 438.273   3
   2  -8   8 24520.8 437.151   3
   2  -8   8 24947.0 501.004   4
  -2   8  -8 24840.9 425.677   6
   2   8   9 9528.82 303.836   5
   2  -8   9 9565.56 289.905   4
  -2  -8  -9 9501.32 299.722   2
  -2   8  -9 9444.32 254.170   3
   2   8  10 13028.0 374.163   5
  -2   8 -10 13267.2 324.391   3
   2  -8  10 13460.1 357.780   4
  -2  -8 -10 12853.8 366.505   2
   2   8  11 8970.19 313.648   5
   2  -8  11 9162.64 294.860   4
  -2   8 -11 8837.45 269.594   3
  -2  -8 -11 9017.31 311.251   2
   2  -8  12 3327.40 181.367   4
   2   8  12 3383.99 200.165   5
  -2   8 -12 3438.22 171.391   3
  -2  -8 -12 3384.99 196.385   2
  -2  -8 -13 2870.17 184.534   2
  -2   8 -13 2839.97 163.137   3
   2  -8  13 2733.22 166.011   4
   2  -8  14 29.2830 51.9634   4
  -2  -8 -14-9.83171 61.1747   2
  -2   8 -14 23.7015 56.5600   3
  -2  -8 -15-24.9873 61.8551   2
   2  -8  15 50.9856 57.2369   4
  -2   8 -15 41.0391 51.1154   3
  -2  -8 -16 722.416 115.952   3
  -2  -8 -16 878.465 133.326   2
   2  -8  16 854.059 111.123   4
  -2   8 -16 697.410 102.480   3
  -2   8 -17 6335.47 293.283   3
   2  -8  17 6505.04 286.130   4
  -2  -8 -17 6494.51 313.887   3
  -2   8 -18 10118.1 389.266   3
  -2  -8 -18 10221.5 410.500   3
   2  -8  18 11033.8 386.964   4
  -2  -8 -19 6021.88 319.874   3
   2  -8  19 6074.10 294.481   4
  -2   8 -19 6004.43 302.704   3
  -2  -8 -20 7152.67 358.184   3
  -2   8 -20 6608.96 334.531   3
   2  -8  20 7550.81 334.328   4
  -2   8 -21 4213.30 274.613   3
   2  -8  21 3957.10 249.075   4
   2   9 -22-53.5069 90.2531   3
  -2  -9  22 127.502 76.4238   4
   2  -9 -21 7150.45 354.138   3
   2   9 -21 6998.63 359.725   3
  -2  -9  21 7735.31 376.413   4
   2  -9 -20 113.720 69.3002   3
   2   9 -20 91.0725 80.1667   3
  -2  -9  20 205.444 98.3072   4
  -2  -9  19 7418.11 351.479   4
   2  -9 -19 7659.09 345.190   3
   2   9 -19 7560.17 352.564   3
   2  -9 -18 102.164 78.3310   3
  -2  -9  18 66.3627 75.6783   4
   2   9 -18 53.7837 78.7486   3
  -2  -9  17 3537.51 233.475   4
   2   9 -17 3799.71 231.343   3
   2  -9 -17 3931.74 230.003   3
   2  -9 -16 949.638 119.149   3
   2   9 -16 969.057 115.120   3
  -2  -9  16 656.552 105.183   4
  -2  -9  15 814.474 111.014   4
   2  -9 -15 668.387 96.4986   3
   2   9 -15 743.410 103.731   3
   2  -9 -14 56.8439 56.2769   3
   2   9 -14 84.6460 60.2918   3
  -2  -9  14 89.7029 65.4998   4
   2   9 -14 21.1578 49.7431   6
   2   9 -13 4598.42 209.653   6
   2  -9 -13 4392.87 213.070   3
   2   9 -13 4352.81 214.915   3
  -2  -9  13 4498.28 231.545   4
   2   9 -12 284.104 56.6940   1
   2   9 -12 376.137 71.3706   6
  -2  -9  12 244.358 68.7049   4
   2  -9 -12 317.383 66.1566   3
   2   9 -12 379.355 72.8061   3
   2   9 -11 21922.5 491.225   3
  -2  -9  11 20988.8 510.640   4
   2  -9 -11 20616.2 472.192   3
   2   9 -11 21390.1 440.376   1
   2   9 -11 21595.2 476.994   6
   2   9 -10 385.342 69.1157   3
  -2  -9  10 333.847 73.4574   4
   2   9 -10 322.027 64.9216   6
   2   9 -10 307.919 56.7266   1
  -2  -9   9 57122.3 948.330   4
  -2   9   9 55619.1 875.342   5
   2   9  -9 57902.3 900.749   6
   2   9  -9 55952.4 866.073   1
   2  -9  -9 56930.0 858.894   2
   2   9  -9 56754.4 903.665   3
  -2   9   8 107.018 44.4744   5
   2   9  -8 158.384 50.9885   3
   2  -9  -8 110.981 55.5261   7
  -2   9   8 94.9787 48.5917   1
   2   9  -8 90.8205 44.8037   1
  -2  -9   8 88.1424 65.5437   4
   2  -9  -8 74.2389 37.7953   2
   2   9  -7 48563.2 768.989   1
   2   9  -7 48865.1 783.935   3
  -2   9   7 49073.7 741.917   5
   2  -9  -7 49393.7 728.779   2
  -2   9   7 46506.5 711.367   2
  -2   9   7 49113.0 791.342   1
   2  -9  -7 49078.9 792.658   7
  -2  -9   7 50239.9 835.254   4
   2  -9  -6 633.783 74.6806   7
  -2   9   6 555.819 54.3226   2
   2   9  -6 636.615 72.4287   5
   2   9  -6 553.527 71.0431   3
  -2   9   6 646.209 74.3605   1
  -2  -9   6 847.038 94.9441   4
   2   9  -6 535.458 68.2806   1
   2  -9  -6 560.151 56.7772   2
  -2   9   6 605.319 61.0110   5
   2   9  -5 15593.2 343.874   5
   2   9  -5 15516.0 355.816   3
   2   9  -5 15612.4 355.678   1
  -2  -9   5 15733.5 364.939   7
  -2   9   5 15544.8 361.612   1
   2  -9  -5 16006.6 299.695   2
  -2   9   5 16336.9 312.635   5
  -2   9   5 15218.7 286.963   2
   2  -9  -5 15775.3 364.979   7
  -2   9   4 388.054 43.4431   5
   2   9  -4 441.310 66.5840   1
   2   9  -4 493.094 65.7754   5
  -2   9   4 469.326 71.4492   1
   2  -9  -4 514.626 69.6329   7
   2  -9  -4 401.655 40.8397   2
  -2  -9   4 578.338 73.9277   7
   2   9  -3 209.575 57.5775   1
  -2   9   3 77.0888 26.2896   5
  -2   9   3 90.3011 46.1302   1
   2  -9  -3 115.537 46.7323   7
   2   9  -3 60.7556 53.0703   5
  -2  -9   3 257.567 54.0892   2
  -2  -9   3 33.1130 39.5144   7
   2  -9  -3 42.0652 22.6180   2
  -2  -9   2 947.885 87.2647   7
   2   9  -2 872.253 73.3980   5
   2   9  -2 906.006 84.2862   1
  -2  -9   2 1007.26 78.1953   2
   2  -9  -2 930.763 85.9105   7
  -2   9   2 987.198 57.5286   5
   2  -9  -2 905.829 51.1433   2
   2  -9  -2 993.379 62.9598   3
  -2   9   2 1080.56 93.3092   1
  -2  -9   1 6825.66 221.423   7
   2   9  -1 6674.12 201.800   5
  -2   9   1 6869.04 222.614   1
   2  -9  -1 6509.25 163.892   3
   2  -9  -1 6726.42 144.156   2
   2   9  -1 6906.47 225.824   1
   2  -9  -1 6727.15 219.589   7
  -2  -9   1 7047.82 205.491   2
  -2   9   1 6802.09 152.625   5
  -2   9   0 520.276 41.0952   5
  -2   9   0 630.999 77.0781   1
   2  -9   0 480.800 43.0205   3
   2  -9   0 496.593 36.9906   2
   2   9   0 593.680 66.6021   5
   2   9   0 590.732 78.7444   1
   2  -9   0 366.719 63.9150   7
  -2  -9   0 526.073 67.8533   7
  -2  -9   0 455.500 57.8580   2
  -2  -9  -1 35337.3 576.488   2
  -2   9  -1 34600.1 487.455   5
   2   9   1 34331.3 575.757   5
   2  -9   1 34798.1 606.263   7
  -2  -9  -1 33870.2 606.698   7
   2   9   1 34214.1 614.297   1
   2  -9   1 35158.3 499.626   3
   2  -9   1 34674.7 478.393   2
   2  -9   1 34910.7 493.188   5
   2   9   2 690.623 70.4253   5
  -2  -9  -2 826.937 86.4962   7
   2  -9   2 723.772 78.4761   7
   2   9   2 680.873 78.0845   1
   2  -9   2 700.622 47.8731   5
  -2  -9  -2 560.126 63.9047   2
   2  -9   2 686.884 49.1366   3
   2  -9   2 711.688 46.1220   2
  -2  -9  -3 36290.6 642.859   7
   2  -9   3 36350.3 529.612   5
  -2  -9  -3 37396.1 619.581   2
   2   9   3 37447.3 622.973   5
   2  -9   3 37069.5 532.017   3
   2  -9   4 538.454 46.8419   5
  -2  -9  -4 449.115 69.7679   7
   2   9   4 676.560 78.3689   5
  -2  -9  -4 577.847 67.4782   2
   2  -9   4 466.923 44.5019   3
   2  -9   5 32701.7 510.995   5
   2  -9   5 33296.3 511.680   3
   2   9   5 34560.2 607.111   5
  -2   9  -5 34071.1 518.647   3
  -2  -9  -5 33644.3 598.473   2
  -2  -9  -6 494.837 76.2787   2
   2  -9   6 409.712 47.4481   5
  -2   9  -6 414.665 50.6084   3
   2   9   6 428.479 69.5826   5
  -2   9  -6 380.051 49.8417   6
   2  -9   6 439.543 47.6230   3
   2  -9   7 13674.5 292.715   3
   2   9   7 13909.9 359.918   5
  -2  -9  -7 13728.7 353.742   2
  -2   9  -7 13729.3 290.553   6
  -2   9  -7 14144.7 299.956   3
  -2   9  -8 82.9718 34.3142   6
  -2   9  -8 148.616 41.5600   3
   2   9   8 129.809 58.9351   5
  -2  -9  -8 193.345 57.8258   2
   2   9   9 182.013 71.3895   5
  -2  -9  -9 99.2162 59.7506   2
  -2   9  -9 32.0866 36.9784   3
  -2   9  -9 26.3293 32.5359   6
  -2  -9 -10 762.357 92.2305   2
   2   9  10 912.360 115.724   5
   2  -9  10 873.548 102.452   4
  -2   9 -10 918.159 83.7029   3
   2  -9  11 7942.29 285.272   4
   2   9  11 8335.77 307.005   5
  -2  -9 -11 7926.89 295.215   2
  -2   9 -11 8116.68 257.487   3
  -2  -9 -12 557.577 88.6297   2
   2  -9  12 422.963 83.6197   4
  -2   9 -12 465.875 74.9641   3
   2   9  12 496.151 95.0749   5
   2   9  13 15556.4 458.976   5
  -2  -9 -13 15018.3 446.249   2
  -2   9 -13 14651.5 395.787   3
   2  -9  13 15334.5 427.861   4
  -2  -9 -14-46.4456 61.0861   2
   2   9  14 56.8064 80.8630   5
   2  -9  14 10.4998 56.2803   4
  -2   9 -14 64.5965 49.0808   3
   2   9  15 8003.81 340.820   5
   2  -9  15 7276.05 298.737   4
  -2   9 -15 7144.20 289.453   3
  -2  -9 -15 7510.14 326.551   2
   2   9  16 49.9473 87.6523   5
  -2  -9 -16-26.6512 71.6965   2
   2  -9  16 32.0402 68.1732   4
  -2  -9 -16-22.6366 84.2070   3
  -2   9 -16-31.6849 57.3808   3
  -2  -9 -17 5143.35 284.406   3
   2  -9  17 4646.75 251.135   4
   2   9  17 4625.33 280.934   5
  -2   9 -17 4390.24 246.141   3
   2  -9  18 562.364 105.211   4
  -2  -9 -18 674.276 118.259   3
  -2   9 -18 443.606 97.0727   3
   2   9  18 301.625 88.5931   5
  -2   9 -19-20.7680 70.0818   3
  -2  -9 -19 154.059 76.9751   3
   2  -9  19 225.519 89.5980   4
   2   9  19 30.1020 100.336   5
   2   9  20-1.95605 105.347   5
  -2  -9 -20 94.9152 73.6837   3
   2  -9  20 87.6119 89.4312   4
   2  -9  21 3568.74 243.006   4
   2  10 -22 885.724 143.880   3
   2 -10 -21 430.958 107.547   3
  -2 -10  21 1192.38 161.279   4
   2  10 -21 1011.57 158.935   3
   2 -10 -20-27.9197 69.5128   3
   2  10 -20 85.3769 91.1640   3
  -2 -10  20 107.095 75.1867   4
   2 -10 -19 1767.13 176.482   3
  -2 -10  19 1910.98 189.026   4
   2  10 -19 1925.90 187.350   3
  -2 -10  18 961.578 138.000   4
   2  10 -18 1134.96 140.135   3
   2 -10 -18 1029.37 129.432   3
   2  10 -17 3721.68 182.448   1
   2 -10 -17 3732.98 225.098   3
  -2 -10  17 3221.24 226.063   4
   2  10 -17 3435.08 226.281   3
   2  10 -16 11217.2 398.669   3
  -2 -10  16 10921.5 409.231   4
   2 -10 -16 11111.1 387.959   3
   2  10 -16 11166.2 326.341   1
  -2 -10  15 8444.46 347.348   4
   2  10 -15 8504.53 332.953   3
   2  10 -15 8309.20 275.034   1
   2 -10 -15 8484.91 323.641   3
   2  10 -14 12203.5 389.758   3
  -2 -10  14 11818.9 405.786   4
   2  10 -14 11895.5 331.797   1
   2  10 -14 12168.1 370.438   6
   2 -10 -14 11607.4 374.514   3
   2  10 -13 14332.8 368.208   1
   2  10 -13 13997.0 393.458   6
  -2 -10  13 14017.8 437.421   4
   2  10 -13 14837.9 420.600   3
   2 -10 -13 14305.2 415.108   3
   2 -10 -12 8386.30 291.427   3
   2  10 -12 8035.39 292.642   3
   2  10 -12 7926.99 259.928   1
  -2 -10  12 7807.11 310.974   4
  -2  10  12 8074.81 290.484   5
   2  10 -12 8612.49 292.548   6
   2  10 -11 9401.60 307.292   3
  -2  10  11 9404.59 301.646   5
   2  10 -11 9316.00 282.858   1
   2 -10 -11 9512.73 310.869   3
   2  10 -11 9292.12 300.461   6
  -2 -10  11 9272.66 333.760   4
   2 -10 -10 801.529 97.6973   7
   2  10 -10 829.213 85.0226   1
   2  10 -10 1025.52 100.185   6
  -2  10  10 894.657 94.7613   5
  -2 -10  10 861.121 108.263   4
   2  10 -10 906.741 97.6528   3
   2  10  -9 1605.01 120.555   6
  -2  10   9 1761.55 118.774   5
   2  10  -9 1531.53 112.267   1
  -2 -10   9 1880.49 153.040   4
   2 -10  -9 1801.83 112.055   2
   2  10  -9 1658.81 121.073   3
   2 -10  -9 1773.39 128.874   7
  -2  10   8 56.5591 45.8786   5
   2  10  -8 11.5645 40.2254   3
   2  10  -8 79.0535 50.4733   1
  -2 -10   8 27.5214 55.7761   4
  -2  10   8-15.3800 48.4662   1
   2 -10  -8 11.1511 33.7707   2
   2 -10  -8-60.8501 58.6008   7
  -2  10   7 701.839 72.0310   5
  -2 -10   7 748.529 96.2890   4
   2  10  -7 806.547 87.5849   1
   2 -10  -7 768.020 86.7907   7
   2 -10  -7 746.685 67.4641   2
  -2  10   7 640.004 63.8314   2
  -2  10   7 866.729 89.9437   1
   2  10  -7 765.185 84.2462   3
   2  10  -6 7713.58 238.546   5
   2 -10  -6 7720.17 205.089   2
  -2  10   6 7655.54 213.852   5
  -2  10   6 7173.58 192.671   2
   2  10  -6 7965.08 252.262   1
   2  10  -6 7836.14 249.746   3
   2 -10  -6 7915.35 259.546   7
  -2  10   6 7540.45 252.303   1
  -2  10   5 3785.77 176.223   1
   2 -10  -5 3857.61 131.774   2
  -2 -10   5 3737.86 175.299   7
  -2  10   5 3632.63 123.458   2
  -2  10   5 3813.77 138.212   5
   2  10  -5 3991.57 165.356   5
   2 -10  -5 3985.52 180.044   7
   2  10  -5 4153.34 177.910   1
   2 -10  -4 18519.7 418.655   7
  -2 -10   4 19365.9 425.568   7
   2  10  -4 19148.6 420.583   1
   2 -10  -4 18849.3 329.606   2
   2  10  -4 18679.8 390.334   5
  -2  10   4 18425.4 338.576   5
  -2  10   4 18388.5 419.344   1
  -2 -10   4 18348.4 383.511   2
   2 -10  -3 16157.9 379.742   7
   2  10  -3 15324.3 343.500   5
  -2  10   3 15833.1 292.823   5
  -2  10   3 15919.9 380.735   1
   2 -10  -3 15861.2 318.470   3
   2  10  -3 15782.4 377.364   1
  -2 -10   3 15718.4 376.146   7
   2 -10  -3 16080.0 282.448   2
  -2 -10   3 15581.6 343.658   2
   2  10  -2 19211.7 393.542   5
  -2  10   2 19346.7 326.142   5
   2 -10  -2 19781.8 315.579   2
  -2 -10   2 18566.1 420.387   7
  -2  10   2 19163.5 428.649   1
   2 -10  -2 19309.8 424.016   7
   2 -10  -2 18387.1 345.356   3
   2  10  -2 18947.8 424.651   1
  -2 -10   2 19229.2 389.455   2
  -2  10   1 497.346 77.8662   1
   2 -10  -1 424.200 45.1536   3
  -2 -10   1 368.738 57.2953   2
  -2  10   1 543.790 48.2398   5
   2 -10  -1 411.225 37.0454   2
   2  10  -1 514.821 63.1814   5
   2 -10  -1 528.975 71.9473   7
   2  10  -1 363.619 68.2055   1
  -2 -10   1 574.280 77.4545   7
  -2  10   0 5475.79 210.646   1
   2  10   0 6123.95 225.003   1
   2 -10   0 5776.84 154.014   3
   2  10   0 5562.24 191.761   5
  -2 -10   0 5619.40 210.719   7
   2 -10   0 5971.43 216.242   7
   2 -10   0 5655.70 136.711   2
  -2  10   0 5876.61 146.216   5
  -2 -10   0 5920.77 193.924   2
  -2  10  -1 1617.06 73.1765   5
   2  10   1 1631.13 106.210   5
  -2 -10  -1 1475.11 97.6539   2
   2 -10   1 1492.96 66.1636   2
  -2 -10  -1 1620.58 118.938   7
   2  10   1 1888.27 126.503   1
   2 -10   1 1667.89 79.0572   3
   2 -10   1 1488.74 71.9013   5
  -2  10  -1 1741.66 119.371   1
   2 -10   1 1742.09 119.445   7
  -2 -10  -2 526.682 63.9920   2
   2 -10   2 511.063 45.9455   3
   2 -10   2 459.201 70.1489   7
   2  10   2 486.210 64.8381   5
   2 -10   2 549.346 46.7379   5
   2 -10   2 459.040 39.6443   2
  -2 -10  -2 577.473 82.2307   7
   2  10   2 597.098 81.4178   1
   2 -10   3 529.755 48.3141   5
   2  10   3 461.729 65.6439   5
  -2 -10  -3 554.638 67.8449   2
   2 -10   3 401.193 40.1467   2
   2 -10   3 473.813 44.8463   3
  -2 -10  -3 579.647 83.8235   7
   2  10   3 536.548 79.9500   1
   2 -10   4 4346.96 135.752   3
  -2 -10  -4 4372.17 196.615   7
   2  10   4 4622.42 186.258   5
  -2 -10  -4 4338.69 178.626   2
   2 -10   4 4188.08 133.987   5
  -2 -10  -5 7438.49 260.697   7
   2 -10   5 7181.63 187.905   3
   2 -10   5 7120.29 188.132   5
  -2 -10  -5 7038.20 237.010   2
   2  10   5 7412.14 245.490   5
   2  10   6 18980.5 432.064   5
   2 -10   6 17511.4 347.744   3
  -2  10  -6 19246.7 360.856   3
   2 -10   6 18697.6 355.783   5
  -2 -10  -6 19025.5 429.625   2
  -2  10  -6 19197.0 364.415   6
  -2 -10  -7 16897.0 414.779   2
  -2  10  -7 17977.4 355.480   6
   2  10   7 18041.1 430.424   5
  -2  10  -7 17970.6 358.384   3
  -2 -10  -8 25560.2 544.460   2
   2  10   8 25246.0 546.205   5
  -2  10  -8 26099.9 472.347   3
  -2  10  -8 25382.8 458.739   6
  -2  10  -9 14462.9 323.726   6
   2  10   9 14912.7 407.296   5
  -2  10  -9 14882.4 342.016   3
  -2 -10  -9 14735.9 400.894   2
  -2 -10 -10 8853.49 308.366   2
  -2  10 -10 8454.04 258.829   3
   2  10  10 8838.51 313.426   5
  -2 -10 -11 6973.04 282.762   2
  -2  10 -11 6698.96 235.293   3
   2  10  11 6617.30 280.159   5
   2 -10  12 3134.87 200.058   4
   2  10  12 2648.93 185.605   5
  -2 -10 -12 2762.38 185.151   2
  -2  10 -12 3201.78 169.364   3
   2  10  13 447.794 105.282   5
   2 -10  13 364.746 78.2026   4
  -2 -10 -13 342.519 77.8264   2
  -2  10 -13 409.015 73.2189   3
   2 -10  14 945.085 126.884   4
   2  10  14 643.090 118.132   5
  -2 -10 -14 688.990 105.520   2
  -2  10 -14 664.239 96.1779   3
   2  10  15-67.6406 79.5983   5
   2 -10  15 34.0230 64.6720   4
  -2 -10 -15 8.68622 74.7643   2
  -2  10 -15-77.6122 66.2910   3
   2  10  16 1424.47 163.168   5
   2 -10  16 1523.84 150.701   4
  -2 -10 -16 1627.73 169.843   2
  -2  10 -16 1487.02 142.542   3
   2 -10  17 3263.29 218.431   4
  -2 -10 -17 3440.25 239.153   3
  -2  10 -17 3345.54 214.669   3
   2  10  17 3575.40 256.832   5
  -2 -10 -18 8642.77 396.567   3
   2  10  18 8696.03 405.014   5
   2 -10  18 8183.23 353.641   4
   2  10  19 5060.21 308.697   5
   2 -10  19 4662.62 273.426   4
  -2 -10 -19 4860.31 296.171   3
   2 -10  20 7016.79 341.795   4
   2  11 -21 1603.43 184.226   3
   2 -11 -20 6869.05 345.568   3
  -2 -11  20 6397.29 346.329   4
   2  11 -20 6816.59 359.944   3
  -2 -11  19 447.742 110.132   4
   2 -11 -19 751.256 128.521   3
   2  11 -19 500.650 118.144   3
  -2  11  18 4032.66 260.790   5
   2 -11 -18 4390.89 261.013   3
   2  11 -18 4067.15 262.403   3
  -2 -11  18 3835.88 262.486   4
   2 -11 -17 742.575 120.842   3
  -2 -11  17 782.544 125.946   4
  -2  11  17 783.618 124.963   5
   2  11 -17 729.218 118.675   3
  -2  11  16 976.857 140.238   5
   2  11 -16 777.632 93.6029   1
   2 -11 -16 852.327 117.376   3
  -2 -11  16 722.450 124.304   4
   2  11 -16 969.641 131.091   3
   2  11 -15 1164.91 124.315   6
   2 -11 -15 1398.25 139.995   3
  -2  11  15 1042.20 125.824   5
  -2 -11  15 973.485 131.409   4
   2  11 -15 983.385 103.614   1
   2  11 -15 1459.44 146.294   3
   2  11 -14 139.920 63.2212   6
   2  11 -14 202.465 64.4648   1
  -2 -11  14 232.440 90.3795   4
   2 -11 -14 132.972 62.9028   3
  -2  11  14 239.529 84.7305   5
   2  11 -14 227.670 65.1514   3
  -2 -11  13 473.567 112.007   4
  -2  11  13 406.999 91.6625   5
   2  11 -13 428.852 81.2732   6
   2  11 -13 265.075 62.0202   1
   2  11 -13 360.603 81.8863   3
   2 -11 -13 540.485 93.5829   3
   2  11 -12 13073.1 363.401   1
   2  11 -12 13813.8 390.534   6
  -2 -11  12 13574.0 432.845   4
   2 -11 -12 13426.0 397.916   7
   2 -11 -12 13278.5 386.324   3
  -2  11  12 13444.6 389.674   5
   2  11 -12 14087.0 405.887   3
  -2  11  11 45.8830 58.7439   5
  -2 -11  11 233.100 77.4993   4
   2  11 -11 11.6543 52.3205   6
   2  11 -11 15.5902 54.5857   3
   2  11 -11 69.6456 49.0668   1
   2 -11 -11 173.631 71.3406   7
  -2  11  10 21377.5 474.472   5
   2  11 -10 21510.1 481.372   1
   2 -11 -10 21582.3 509.612   7
  -2 -11  10 21621.0 544.581   4
   2  11 -10 20824.7 486.301   6
   2  11 -10 21980.1 500.663   3
   2  11  -9 74.5606 54.4160   1
  -2 -11   9 31.1931 62.0099   4
   2 -11  -9 136.982 45.3299   2
   2  11  -9 94.0464 56.1299   3
  -2  11   9 73.5722 46.8475   5
   2 -11  -9-31.9561 53.9739   7
   2  11  -9 234.860 65.4221   6
   2  11  -8 41891.6 740.273   1
   2 -11  -8 43085.2 770.373   7
   2  11  -8 41635.7 744.732   3
  -2  11   8 41821.6 762.601   1
  -2  11   8 41219.0 693.945   5
   2 -11  -8 42181.9 681.807   2
  -2  11   7 922.326 102.676   1
  -2  11   7 675.616 78.4083   5
   2  11  -7 638.268 81.1030   1
   2 -11  -7 676.225 67.7257   2
   2  11  -7 756.108 89.0515   3
   2 -11  -7 880.695 100.541   7
   2 -11  -6 23495.7 509.269   7
  -2  11   6 22541.7 427.551   5
   2  11  -6 22372.6 468.178   5
   2  11  -6 22944.2 495.384   1
  -2  11   6 22766.9 506.321   1
   2 -11  -6 23664.0 420.467   2
   2  11  -5-1.33981 45.8890   5
  -2  11   5 97.1483 64.9265   1
  -2 -11   5 30.9330 35.1004   2
  -2  11   5 12.0101 35.2510   5
  -2 -11   5-59.8569 62.7060   7
   2  11  -5 69.1379 49.3574   1
   2 -11  -5 20.1387 28.2499   2
   2 -11  -5 72.7733 55.9167   7
  -2 -11   4 1208.81 110.673   7
  -2 -11   4 1048.51 86.9653   2
   2 -11  -4 1211.33 107.178   7
   2  11  -4 1361.27 99.5915   5
   2 -11  -4 1361.88 76.1576   2
   2  11  -4 1256.05 109.488   1
  -2  11   4 1329.92 113.329   1
  -2  11   4 1123.64 74.8579   5
  -2 -11   3 318.950 65.8519   7
   2 -11  -3 266.483 63.7174   7
  -2  11   3 228.925 41.6409   5
   2  11  -3 130.111 43.7328   5
   2  11  -3 296.774 70.5033   1
  -2 -11   3 235.117 54.5466   2
  -2  11   3 291.706 69.6115   1
   2 -11  -3 157.527 35.8399   2
   2 -11  -3 300.856 50.7149   3
   2 -11  -2 3655.42 177.150   7
   2  11  -2 3886.83 164.825   5
  -2 -11   2 3948.79 163.993   2
   2 -11  -2 3821.89 116.630   2
  -2  11   2 4043.90 191.389   1
   2  11  -2 3778.73 181.096   1
   2 -11  -2 3928.53 140.875   3
  -2 -11   2 3788.86 182.930   7
  -2  11   2 3967.72 126.978   5
  -2  11   1 53.6435 51.7223   1
   2 -11  -1-18.7934 25.6856   3
   2  11  -1 39.7429 53.0271   1
   2  11  -1 35.3910 45.2320   5
  -2 -11   1 32.7096 41.6346   2
   2 -11  -1 43.6709 51.5972   7
   2 -11  -1 18.5986 19.7837   2
  -2 -11   1-52.5183 51.2471   7
  -2  11   1-2.29783 25.7620   5
   2  11   0 13234.3 363.881   1
   2 -11   0 13385.5 245.921   2
   2  11   0 13678.7 327.634   5
   2 -11   0 13072.3 271.150   3
  -2  11   0 13036.3 358.614   1
  -2 -11   0 13776.4 327.846   2
   2 -11   0 13852.5 361.814   7
  -2 -11   0 13109.7 357.670   7
  -2  11   0 13642.7 258.595   5
  -2 -11  -1 501.637 80.9194   7
  -2 -11  -1 542.010 70.6158   2
   2 -11   1 652.292 90.8865   7
  -2  11  -1 617.399 87.0161   1
   2  11   1 562.864 72.3071   5
   2  11   1 642.334 86.9741   1
   2 -11   1 608.154 46.7010   2
   2 -11   1 541.473 50.3895   3
  -2  11  -1 578.614 48.4469   5
   2  11   2 40082.2 671.951   5
  -2 -11  -2 39052.1 715.305   7
  -2 -11  -2 39619.1 667.884   2
   2 -11   2 39001.1 572.838   5
   2 -11   2 36241.4 577.633   3
  -2  11  -2 39872.2 715.326   1
   2 -11   2 40166.4 558.954   2
   2 -11   2 39980.5 713.411   7
   2  11   2 38919.7 722.154   1
   2 -11   3 530.476 50.9684   5
   2  11   3 737.382 86.4878   5
   2 -11   3 571.541 56.0152   3
  -2 -11  -3 564.497 70.2354   2
   2  11   3 379.080 76.0205   1
  -2 -11  -3 473.936 75.2948   7
   2 -11   3 524.175 48.1957   2
   2  11   4 41368.4 708.694   5
   2 -11   4 40688.1 598.374   2
   2 -11   4 41408.1 610.777   3
  -2 -11  -4 41397.6 708.315   2
   2 -11   4 40392.1 608.469   5
  -2 -11  -4 40977.7 749.507   7
   2  11   5 183.991 58.3582   5
  -2 -11  -5 232.830 70.7552   7
  -2 -11  -5 205.138 57.4596   2
  -2 -11  -6 17754.6 422.076   2
   2  11   6 17032.8 417.194   5
  -2 -11  -6 17372.4 444.546   7
  -2 -11  -7 996.268 113.793   7
  -2  11  -7 978.498 77.6576   3
   2  11   7 909.585 101.360   5
  -2 -11  -7 864.274 92.5114   2
  -2  11  -7 1033.42 85.9194   6
   2  11   8 110.517 61.0090   5
  -2 -11  -8-21.9761 51.4971   2
  -2  11  -8 81.0862 43.6450   6
  -2  11  -8 17.5882 33.4895   3
  -2  11  -9 528.075 70.1032   6
  -2  11  -9 396.382 61.9105   3
   2  11   9 529.067 81.8682   5
  -2 -11  -9 581.966 87.5137   2
  -2 -11 -10 2669.02 172.246   2
   2  11  10 2565.93 174.029   5
  -2  11 -10 2724.15 143.754   3
  -2  11 -10 2609.71 132.873   6
   2  11  11 4166.48 226.937   5
  -2  11 -11 3743.66 175.212   3
  -2 -11 -11 4040.88 217.682   2
  -2  11 -12 13417.9 366.089   3
  -2 -11 -12 13157.1 416.999   2
   2  11  12 13639.5 429.135   5
  -2  11 -13 3419.23 186.447   3
   2  11  13 3576.47 226.681   5
  -2 -11 -13 3360.38 211.926   2
   2  11  14 10306.5 395.359   5
  -2  11 -14 9492.18 328.750   3
  -2 -11 -14 10583.2 390.356   2
   2  11  15 2901.54 221.686   5
  -2 -11 -15 2686.94 201.837   2
   2  11  16 11325.2 444.921   5
  -2 -11 -16 11746.2 441.059   2
  -2 -11 -17 1209.01 152.882   3
   2 -11  17 1323.31 156.673   4
   2  11  17 1043.26 162.656   5
   2  11  18 3882.47 280.715   5
   2 -11  18 3749.93 250.535   4
  -2 -11 -18 4381.48 277.842   3
   2 -11  19 438.623 110.537   4
   2 -11  20 383.029 108.839   4
  -2  12  20-35.1165 100.471   5
   2  12 -19 19.9638 91.7905   3
   2 -12 -19 235.915 80.5715   3
  -2 -12  19 135.667 104.566   4
  -2  12  19 339.188 113.559   5
   2  12 -18 2701.89 214.884   3
   2 -12 -18 2808.51 216.203   3
  -2 -12  18 2859.82 241.158   4
  -2  12  18 2546.23 216.119   5
  -2 -12  17 3473.00 257.123   4
   2  12 -17 3244.26 227.131   3
   2 -12 -17 3179.63 226.631   3
  -2  12  17 3305.69 237.817   5
  -2 -12  16 5565.08 309.566   4
  -2  12  16 5523.69 289.432   5
   2  12 -16 5531.16 245.036   1
   2 -12 -16 5674.29 284.185   3
   2  12 -16 5689.77 292.280   3
  -2 -12  15 10004.7 409.737   4
   2  12 -15 9770.56 329.712   1
   2  12 -15 10089.4 379.389   3
   2  12 -15 10334.8 363.798   6
   2 -12 -15 10540.6 380.343   7
  -2  12  15 9905.84 377.646   5
   2 -12 -15 10371.5 375.664   3
   2  12 -14 9388.89 354.367   3
   2  12 -14 8570.69 323.079   6
  -2 -12  14 9179.02 378.720   4
   2  12 -14 8750.19 307.749   1
   2 -12 -14 9521.26 348.108   3
   2 -12 -14 8513.67 337.410   7
  -2  12  14 9143.41 342.704   5
   2  12 -13 12196.0 369.099   1
  -2 -12  13 12983.0 446.438   4
   2 -12 -13 13273.8 404.416   3
   2  12 -13 12650.0 403.884   3
   2 -12 -13 12863.3 411.156   7
   2  12 -13 12535.9 389.287   6
  -2  12  13 12617.1 394.961   5
   2  12 -12 7944.84 289.739   1
   2 -12 -12 8535.72 322.786   7
  -2 -12  12 8396.58 347.526   4
   2 -12 -12 8436.51 306.988   3
  -2  12  12 8330.79 302.044   5
   2  12 -12 8471.80 305.760   6
   2  12 -12 8089.35 307.881   3
  -2  12  11 2033.36 144.977   5
  -2 -12  11 2265.89 182.599   4
   2 -12 -11 2149.29 161.544   7
   2  12 -11 2093.37 147.335   1
   2  12 -11 2427.59 167.486   3
   2  12 -11 2140.05 150.978   6
  -2  12  10 8107.18 274.856   5
   2  12 -10 8066.75 298.448   3
   2 -12 -10 8434.77 312.606   7
   2  12 -10 8123.81 288.478   1
   2  12 -10 8615.67 299.071   6
   2 -12  -9 1341.08 127.735   7
   2  12  -9 1589.27 128.415   6
  -2  12   9 1331.49 108.612   5
   2  12  -9 1216.29 111.555   1
   2  12  -9 1772.45 136.251   3
   2 -12  -9 1406.82 105.273   2
  -2  12   8 159.591 44.7617   5
   2  12  -8 6.62542 48.2320   1
   2 -12  -8 94.1577 43.4209   2
   2  12  -8 139.396 63.6835   3
   2 -12  -8 68.8261 55.0992   7
  -2  12   8 90.1503 59.5615   1
   2  12  -7 8899.90 298.149   1
  -2  12   7 8882.19 309.297   1
   2 -12  -7 8701.30 240.158   2
   2 -12  -7 8285.39 296.781   7
  -2  12   7 8668.41 250.969   5
   2  12  -6 397.535 77.1784   1
   2 -12  -6 176.540 59.3413   7
   2 -12  -6 320.454 50.1985   2
  -2  12   6 416.851 59.1013   5
  -2 -12   6 344.610 64.1150   2
  -2  12   6 429.978 88.5232   1
  -2 -12   5 20285.5 486.324   7
   2 -12  -5 21067.7 378.972   2
  -2  12   5 20767.6 395.486   5
   2  12  -5 19838.2 439.878   5
  -2  12   5 20721.0 492.241   1
  -2 -12   5 20371.8 439.113   2
   2 -12  -5 20299.2 486.179   7
   2  12  -5 20776.8 483.478   1
  -2  12   4 363.608 74.4610   1
   2  12  -4 514.678 75.6747   5
   2 -12  -4 428.665 78.6570   7
   2 -12  -4 374.986 43.9247   2
  -2 -12   4 503.322 84.9678   7
  -2 -12   4 378.055 65.5521   2
   2  12  -4 371.718 83.2653   1
  -2  12   4 366.004 51.1843   5
  -2  12   3 30296.9 623.041   1
  -2  12   3 30695.3 493.468   5
  -2 -12   3 32148.0 633.206   7
   2  12  -3 30875.3 570.779   5
   2  12  -3 30452.2 620.049   1
  -2 -12   3 30410.7 564.530   2
   2 -12  -3 30467.1 473.658   2
   2 -12  -3 31411.4 624.102   7
  -2  12   2 1223.54 114.561   1
  -2 -12   2 1350.92 123.446   7
  -2  12   2 1278.05 75.8304   5
  -2 -12   2 1440.22 105.439   2
   2  12  -2 1205.46 98.9004   5
   2 -12  -2 1201.97 115.596   7
   2 -12  -2 1126.46 65.1000   2
   2  12  -2 1303.39 120.378   1
  -2 -12   1 27834.7 587.852   7
  -2  12   1 27607.4 589.813   1
  -2  12   1 28435.2 451.948   5
   2  12  -1 28983.2 543.662   5
   2 -12  -1 28732.8 435.887   2
   2  12  -1 27932.2 593.416   1
  -2 -12   1 28762.3 538.293   2
   2 -12  -1 28405.6 588.423   7
   2 -12   0 1299.85 67.8086   2
   2  12   0 1382.75 109.316   5
  -2  12   0 1285.16 118.403   1
  -2  12   0 1418.95 76.9778   5
   2  12   0 1402.58 127.462   1
   2 -12   0 1392.87 121.183   7
  -2 -12   0 1201.22 119.586   7
  -2 -12   0 1163.13 96.9499   2
  -2  12  -1 14602.5 400.410   1
   2  12   1 14978.9 362.686   5
  -2 -12  -1 15014.3 363.223   2
  -2 -12  -1 15753.5 413.222   7
   2  12   1 13985.0 399.371   1
   2 -12   1 14688.0 396.958   7
   2 -12   1 15192.8 275.945   2
  -2  12  -2 61.8152 53.1583   1
   2  12   2 145.347 55.5976   1
   2 -12   2 207.596 34.3310   2
  -2 -12  -2 235.222 70.0195   7
   2  12   2 173.562 54.5834   5
  -2 -12  -2 268.184 55.1355   2
   2  12   3 104.617 53.4889   5
  -2 -12  -3-19.0769 54.3982   7
   2 -12   3 81.3412 32.9798   2
  -2  12  -3 73.1713 63.6817   1
  -2 -12  -3 124.353 50.7836   2
   2 -12   4 2021.62 95.3331   2
  -2  12  -4 2347.24 156.699   1
  -2 -12  -4 2210.63 155.069   7
  -2 -12  -4 2164.79 137.134   2
   2  12   4 2086.16 139.919   5
  -2 -12  -5 6530.98 244.623   2
   2 -12   5 6639.69 186.027   2
  -2 -12  -5 6976.10 275.832   7
   2  12   5 6766.59 246.972   5
   2  12   6 7768.56 274.546   5
  -2 -12  -6 7581.52 269.758   2
  -2 -12  -6 7752.12 296.179   7
  -2  12  -7 17537.3 375.763   6
   2  12   7 17847.2 446.345   5
  -2 -12  -7 17520.7 439.780   2
  -2 -12  -7 17003.7 466.285   7
   2  12   8 9368.61 319.492   5
  -2  12  -8 9754.50 265.671   6
  -2 -12  -8 10071.4 327.639   2
  -2 -12  -8 9403.50 341.144   7
  -2  12  -9 17009.4 374.451   6
  -2  12  -9 16739.1 375.643   3
  -2 -12  -9 16403.6 447.088   2
  -2 -12  -9 17471.7 482.796   7
   2  12   9 16525.9 452.898   5
  -2  12 -10 1238.44 97.1105   6
  -2 -12 -10 1651.79 142.802   2
  -2  12 -10 1493.72 108.429   3
   2  12  10 1687.39 150.792   5
   2  12  11 7313.83 305.588   5
  -2 -12 -11 6830.15 291.753   2
   2  12  12 400.524 92.0718   5
  -2 -12 -12 430.371 83.1562   2
  -2 -12 -13 1878.92 164.687   2
   2  12  13 1750.45 171.511   5
  -2 -12 -14 86.8815 79.1857   2
   2  12  14 147.922 84.7714   5
   2  12  15 564.044 115.841   5
  -2 -12 -15 562.350 114.527   2
   2  12  16 5205.67 306.786   5
  -2 -12 -16 5551.84 303.313   2
  -2 -12 -17 4781.95 296.700   3
   2  12  17 4734.43 303.826   5
   2  12  18 5124.56 318.315   5
   2 -13 -19 9332.57 402.659   3
   2 -13 -18 5446.11 298.938   7
  -2  13  18 5612.57 318.049   5
   2 -13 -18 5777.47 307.035   3
   2 -13 -17 5367.57 293.875   7
   2 -13 -17 5984.34 309.725   3
  -2 -13  17 6052.60 337.506   4
  -2  13  17 5827.22 309.440   5
   2  13 -17 6173.75 324.580   3
  -2 -13  16 3756.86 270.311   4
   2 -13 -16 4311.59 258.419   7
   2 -13 -16 4237.50 250.395   3
   2  13 -16 4241.18 253.048   3
  -2  13  16 4310.55 259.129   5
   2 -13 -15 168.399 80.9690   7
  -2  13  15 152.888 84.9977   5
   2  13 -15 247.859 85.3286   6
  -2 -13  15 236.395 99.4202   4
   2  13 -15 224.953 70.3606   1
   2 -13 -15 327.731 89.8516   3
   2  13 -15 175.280 84.7480   3
   2  13 -14 369.578 88.4093   6
   2  13 -14 241.398 72.5209   1
   2 -13 -14 246.679 83.2634   3
  -2  13  14 289.777 88.3071   5
  -2 -13  14 242.899 98.5374   4
   2  13 -14 380.296 89.5048   3
   2 -13 -14 650.556 113.208   7
   2  13 -13 2430.90 167.834   1
  -2  13  13 2214.66 167.539   5
   2 -13 -13 2269.47 167.758   3
   2  13 -13 2378.76 177.389   3
   2  13 -13 2346.16 170.488   6
   2 -13 -13 2271.86 180.496   7
   2 -13 -12 247.555 78.6363   7
   2  13 -12 92.9828 63.6835   1
  -2  13  12 114.717 69.5427   5
   2 -13 -12 145.343 53.9280   3
   2  13 -12 168.907 70.7325   3
   2  13 -12 84.8505 55.1535   6
   2  13 -11 7189.21 286.356   1
   2 -13 -11 7171.24 303.691   7
  -2  13  11 7207.70 272.690   5
   2  13 -11 7884.00 297.233   6
   2  13 -11 7693.62 301.110   3
   2  13 -10 24.6296 59.4311   1
  -2  13  10 153.888 59.3590   5
   2 -13 -10 50.1468 59.8811   7
   2  13 -10 139.959 67.1279   6
   2  13 -10 50.8102 53.3204   3
   2  13  -9 15893.3 438.375   1
   2 -13  -9 17718.8 477.813   7
  -2  13   9 16800.4 403.856   5
  -2  13   8 727.772 101.816   1
   2 -13  -8 742.147 106.118   7
   2  13  -8 831.299 103.733   1
   2 -13  -8 842.442 79.5744   2
   2  13  -7 16649.1 446.202   1
   2 -13  -7 16962.3 459.346   7
  -2  13   7 16874.7 464.831   1
  -2 -13   7 16817.5 413.190   2
   2 -13  -7 17291.2 366.697   2
  -2  13   7 17411.9 382.192   5
   2  13  -6 4758.51 224.655   1
  -2  13   6 4531.73 172.233   5
   2 -13  -6 4529.17 158.225   2
  -2  13   6 4633.79 228.733   1
  -2 -13   6 4759.76 201.267   2
   2 -13  -6 4910.50 234.042   7
   2  13  -5 3702.64 178.160   5
  -2 -13   5 4111.37 183.417   2
   2  13  -5 3705.33 200.189   1
  -2  13   5 3931.64 154.291   5
   2 -13  -5 3981.86 141.541   2
  -2  13   5 3808.17 207.584   1
   2 -13  -5 3710.65 202.540   7
  -2 -13   4 118.441 56.3862   7
  -2 -13   4 102.976 45.9821   2
  -2  13   4 101.709 61.6162   1
   2  13  -4 206.390 66.9120   1
   2 -13  -4 132.713 62.5431   7
   2 -13  -4 108.667 29.3069   2
  -2  13   4 166.249 46.2376   5
   2  13  -4 106.468 49.8811   5
   2  13  -3 356.741 73.3023   5
  -2 -13   3 360.705 62.0960   2
  -2 -13   3 374.721 79.9095   7
  -2  13   3 315.851 49.1436   5
   2  13  -3 358.726 76.7519   1
  -2  13   3 333.349 77.0276   1
   2 -13  -3 366.234 74.9698   7
   2 -13  -3 296.778 40.6461   2
  -2 -13   2 2091.46 128.363   2
   2  13  -2 2400.70 139.290   5
  -2  13   2 2425.22 106.849   5
   2 -13  -2 2330.84 94.5863   2
   2 -13  -2 2254.26 157.503   7
   2  13  -2 2207.68 157.174   1
  -2  13   2 2194.93 158.420   1
  -2 -13   2 2263.09 159.237   7
   2  13  -1 13798.8 355.054   5
  -2  13   1 14052.0 285.101   5
  -2 -13   1 13720.8 399.480   7
   2 -13  -1 14033.2 266.041   2
  -2  13   1 14327.1 408.684   1
   2  13  -1 13740.7 402.853   1
  -2 -13   1 14391.3 358.201   2
   2 -13  -1 14080.3 402.508   7
  -2 -13   0 1929.29 126.553   2
   2  13   0 2045.58 153.127   1
  -2  13   0 2034.59 151.069   1
   2 -13   0 1958.84 84.4950   2
   2  13   0 2029.51 130.110   5
  -2  13   0 2002.47 93.7949   5
   2 -13   0 2322.85 161.863   7
  -2 -13   0 2082.55 153.832   7
   2 -13   1 24070.5 552.281   7
   2  13   1 24580.9 569.035   1
  -2  13  -1 23561.5 552.563   1
   2 -13   1 23702.4 386.318   2
  -2 -13  -1 22991.8 549.317   7
  -2 -13  -1 23890.2 498.808   2
   2  13   1 24001.7 499.695   5
  -2  13  -2 102.369 64.8026   1
  -2 -13  -2 10.6443 63.1156   7
   2 -13   2 75.6571 27.2326   2
   2  13   2 112.794 58.3613   5
   2  13   2 138.036 66.1814   1
  -2 -13  -2 19.5843 50.1459   2
  -2 -13  -3 13480.9 360.978   2
  -2  13  -3 14500.8 414.327   1
   2  13   3 13841.1 367.303   5
  -2 -13  -3 14574.6 418.807   7
   2 -13   3 13792.4 275.492   2
   2  13   4 11.2444 50.8802   5
  -2 -13  -4 183.260 81.3273   7
   2 -13   4 41.2823 28.7789   2
  -2  13  -4 131.293 79.6167   1
  -2 -13  -4 16.8200 47.0549   2
   2 -13   5 11104.3 254.874   2
  -2 -13  -5 11351.3 373.251   7
   2  13   5 11047.8 335.494   5
  -2  13  -5 11160.6 363.719   1
  -2 -13  -5 10597.8 326.693   2
   2  13   6 33.9243 52.0451   5
  -2  13  -6 32.1076 56.4659   1
   2 -13   6 36.0765 31.0799   2
  -2 -13  -6 60.1495 45.2032   2
  -2 -13  -6 66.9717 67.4391   7
  -2  13  -7 2656.11 136.816   6
  -2 -13  -7 3003.51 198.183   7
   2  13   7 2839.49 173.259   5
  -2 -13  -7 2723.26 167.445   2
  -2 -13  -8 1347.58 139.259   7
   2  13   8 1433.50 130.337   5
  -2 -13  -8 1194.95 117.167   2
  -2 -13  -9 1169.72 117.930   2
   2  13   9 1370.43 137.835   5
  -2 -13  -9 1157.93 138.812   7
  -2 -13 -10 4601.63 254.113   7
   2  13  10 5067.91 252.012   5
  -2 -13 -10 4830.69 243.004   2
   2  13  11 8811.62 342.598   5
  -2 -13 -11 8326.41 328.545   2
  -2 -13 -11 8427.11 352.766   7
   2  13  12 4961.76 264.071   5
  -2 -13 -12 5570.52 292.191   7
  -2 -13 -12 5179.80 266.779   2
   2  13  13 14920.1 486.916   5
  -2 -13 -13 15252.3 484.089   2
  -2 -13 -14 5974.75 303.743   2
   2  13  14 6134.24 314.034   5
  -2 -13 -15 12160.4 448.135   2
   2  13  15 12669.1 470.431   5
   2  13  16 7418.15 366.999   5
   2  13  17 4172.80 286.071   5
   2 -14 -18 1547.41 173.705   3
   2 -14 -17 1033.28 134.706   7
   2 -14 -17 1222.24 150.457   3
   2 -14 -16 5813.16 300.977   3
   2 -14 -15 1034.86 129.958   3
   2 -14 -15 1166.19 137.443   7
   2  14 -15 1144.95 130.970   1
   2 -14 -14 10440.7 401.400   7
   2  14 -14 10451.8 372.817   6
   2  14 -14 10959.2 398.679   3
   2  14 -14 9937.34 363.755   1
   2 -14 -14 10481.3 381.582   3
   2  14 -13 1856.55 157.460   1
   2  14 -13 2088.17 174.627   3
   2 -14 -13 1832.48 159.094   3
   2  14 -13 1904.18 160.142   6
   2 -14 -13 2027.21 178.551   7
   2  14 -12 5425.90 259.554   1
   2 -14 -12 5644.79 259.600   3
   2  14 -12 5278.57 261.074   3
   2 -14 -12 5423.11 277.076   7
   2  14 -11 1201.80 125.702   1
   2 -14 -11 1413.83 131.295   3
   2 -14 -11 1533.46 155.652   7
   2  14 -11 1268.38 130.088   6
   2  14 -10 386.677 84.8591   6
   2  14 -10 525.166 101.533   1
   2 -14 -10 437.139 95.5077   7
   2  14  -9 1342.18 127.557   6
   2  14  -9 1442.36 138.432   1
  -2 -14   9 1370.35 121.577   2
   2 -14  -9 1508.22 149.065   7
   2  14  -8 4014.38 219.648   1
  -2 -14   8 3983.29 197.320   2
   2 -14  -8 4349.83 237.223   7
  -2  14   8 4102.51 229.592   1
  -2  14   7 502.864 93.0660   1
  -2 -14   7 533.698 76.1214   2
   2  14  -7 508.213 88.9116   1
   2 -14  -7 703.034 103.058   7
  -2  14   6 13194.4 415.537   1
   2  14  -6 12765.0 399.522   1
   2 -14  -6 12865.0 407.414   7
  -2 -14   6 12799.2 357.871   2
  -2  14   5 581.089 100.164   1
  -2 -14   5 581.913 75.1374   2
   2  14  -5 462.768 76.9337   5
   2 -14  -5 614.158 97.2367   7
   2  14  -5 606.328 100.028   1
   2 -14  -4 28976.3 641.958   7
   2  14  -4 28666.4 637.287   1
  -2 -14   4 27489.8 630.309   7
  -2 -14   4 27835.8 563.540   2
  -2  14   4 28319.9 643.223   1
   2  14  -4 27791.6 567.718   5
  -2 -14   3 2018.75 131.921   2
   2 -14  -3 2207.80 166.559   7
   2  14  -3 2235.21 165.170   1
  -2 -14   3 2565.95 176.284   7
  -2  14   3 2102.84 166.451   1
   2  14  -3 2170.27 140.828   5
   2 -14  -2 38586.0 755.208   7
   2  14  -2 36024.9 667.055   5
  -2  14   2 36297.3 748.303   1
  -2 -14   2 35642.3 738.295   7
  -2 -14   2 35216.2 658.153   2
   2  14  -2 35013.9 737.033   1
   2  14  -1 159.811 80.0368   1
  -2 -14   1 47.3374 45.9622   2
  -2 -14   1-16.0935 61.7925   7
   2  14  -1-21.4440 52.8465   5
  -2  14   1 78.6465 69.2908   1
   2 -14  -1 73.3039 70.2632   7
   2 -14   0 20633.3 522.338   7
   2  14   0 20177.8 461.283   5
  -2 -14   0 20216.1 459.666   2
  -2  14   0 20599.8 527.909   1
  -2 -14   0 20151.6 519.463   7
   2  14   0 20089.1 527.332   1
   2  14   1 248.281 73.7236   1
  -2 -14  -1 204.835 74.2538   7
  -2  14  -1-20.2769 64.6708   1
   2 -14   1 322.865 84.3271   7
  -2 -14  -1 156.413 52.2784   2
   2  14   1 192.794 56.3373   5
   2  14   2 1630.49 124.176   5
  -2 -14  -2 1925.89 159.910   7
  -2  14  -2 1904.71 158.111   1
   2  14   2 1759.07 154.782   1
  -2 -14  -2 1480.36 119.850   2
  -2  14  -3 1638.90 146.876   1
  -2 -14  -3 1419.89 138.935   7
  -2 -14  -3 1592.65 124.377   2
   2  14   3 1513.33 122.875   5
  -2  14  -4 548.932 98.1526   1
   2  14   4 530.850 84.8143   5
  -2 -14  -4 452.039 70.8190   2
  -2 -14  -4 598.024 103.415   7
  -2  14  -5 1248.96 132.953   1
   2  14   5 1058.36 115.025   5
  -2 -14  -5 1191.63 112.819   2
  -2 -14  -5 1295.43 136.544   7
  -2 -14  -6 6750.95 266.992   2
   2  14   6 6489.75 266.830   5
  -2  14  -6 6222.63 282.279   1
  -2 -14  -6 7049.11 303.236   7
  -2 -14  -7 4655.82 254.158   7
  -2 -14  -7 4765.26 227.022   2
  -2  14  -7 4803.95 247.646   1
   2  14   7 4496.48 224.433   5
  -2 -14  -8 14755.7 468.781   7
   2  14   8 14840.5 432.789   5
  -2 -14  -8 14482.3 425.867   2
  -2  14  -8 14746.5 452.083   1
  -2  14  -9 1223.90 137.237   1
  -2 -14  -9 1335.40 151.178   7
  -2 -14  -9 1509.30 144.469   2
   2  14   9 1498.54 144.639   5
   2  14  10 7891.72 323.154   5
  -2 -14 -10 8513.56 357.813   7
  -2 -14 -10 7460.13 311.951   2
  -2  14 -10 7883.89 331.874   1
  -2 -14 -11 1939.94 180.237   7
   2  14  11 2339.59 184.963   5
  -2 -14 -11 1964.02 167.308   2
  -2  14 -11 1926.75 170.972   1
  -2 -14 -12 3666.05 245.547   7
   2  14  12 3610.21 238.546   5
  -2 -14 -12 3810.40 232.904   2
   2  14  13 1080.06 143.101   5
  -2 -14 -13 653.316 104.293   2
  -2 -14 -13 1041.96 150.936   7
  -2 -14 -14 298.837 87.4361   7
   2  14  14 423.737 111.750   5
  -2 -14 -14 338.342 102.558   2
   2  14  15-14.8552 92.9303   5
  -2 -14 -15-213.877 98.1394   2
   2  14  16 2769.26 240.926   5
   2 -15 -15 1005.80 144.729   7
   2 -15 -14 110.341 82.6211   7
   2  15 -14-1.06060 64.1537   1
   2 -15 -13 72.4208 72.0980   7
   2  15 -13 25.3920 61.2780   1
   2 -15 -12 4246.58 229.090   3
   2  15 -12 3705.99 226.711   1
   2 -15 -12 4340.61 260.918   7
   2  15 -12 3939.14 225.228   6
   2 -15 -11 1440.36 152.027   7
   2  15 -11 1764.53 156.479   6
   2  15 -11 1901.44 165.559   1
   2 -15 -11 1686.14 140.789   3
   2  15 -10 8468.39 326.920   6
   2 -15 -10 8003.65 344.263   7
  -2 -15  10 8826.09 316.633   2
   2  15 -10 8704.94 343.382   1
  -2 -15   9 3304.11 188.932   2
   2  15  -9 3073.97 204.254   1
   2 -15  -9 3105.85 212.576   7
   2  15  -9 3276.32 201.706   6
  -2 -15   8 11060.8 345.405   2
   2  15  -8 10042.6 371.308   1
   2 -15  -8 11382.5 402.764   7
  -2  15   7 4195.09 244.755   1
   2 -15  -7 4045.85 237.560   7
   2  15  -7 4072.73 231.719   1
  -2 -15   7 4134.87 201.930   2
  -2 -15   6 4392.41 204.604   2
  -2  15   6 4582.16 252.555   1
   2  15  -6 4654.14 244.694   1
   2 -15  -6 4584.77 246.776   7
  -2  15   5 2067.15 168.703   1
   2 -15  -5 2290.36 177.247   7
   2  15  -5 2150.19 173.199   1
  -2 -15   5 2384.28 150.551   2
  -2 -15   4 3785.39 225.966   7
  -2 -15   4 3941.88 192.103   2
  -2  15   4 4368.33 243.244   1
   2 -15  -4 4192.18 236.344   7
   2  15  -4 4024.93 229.173   1
   2  15  -4 4345.04 203.533   5
   2  15  -3 48.1391 50.4631   5
   2 -15  -3 34.4231 61.7114   7
  -2 -15   3 127.603 80.7701   7
  -2 -15   3-3.90869 45.3467   2
   2  15  -3 22.1766 61.8945   1
  -2  15   3-17.5926 60.4482   1
   2  15  -2 339.579 89.9860   1
  -2 -15   2 366.448 88.8964   7
  -2  15   2 244.528 80.3221   1
  -2 -15   2 260.862 63.1716   2
   2  15  -2 262.640 70.6793   5
   2 -15  -2 289.458 84.4131   7
  -2  15   1 119.339 67.7150   1
  -2 -15   1 20.3955 44.6717   2
   2 -15  -1 14.9897 70.5792   7
   2  15  -1 67.0442 69.2782   1
   2  15  -1 68.7553 55.5751   5
  -2 -15   1 182.126 86.4780   7
   2 -15   0 6705.93 295.796   7
   2  15   0 7087.83 260.240   5
   2  15   0 7124.40 309.523   1
  -2  15   0 6264.81 290.445   1
  -2 -15   0 6431.14 291.981   7
  -2 -15   0 6722.70 251.345   2
   2  15   1 1087.66 131.234   1
  -2 -15  -1 1147.47 134.998   7
  -2 -15  -1 871.575 95.1667   2
  -2  15  -1 914.715 124.160   1
   2  15   1 1041.04 111.094   5
  -2 -15  -2 12265.7 355.198   2
  -2  15  -2 12211.5 412.008   1
  -2 -15  -2 11817.9 406.656   7
   2  15   2 11376.6 346.339   5
   2  15   3 2260.59 152.054   5
  -2  15  -3 2531.49 189.133   1
  -2 -15  -3 2270.01 150.295   2
  -2 -15  -3 2344.06 184.888   7
   2  15   4 5054.90 228.165   5
  -2 -15  -4 4731.21 221.388   2
  -2 -15  -4 4706.15 256.566   7
  -2  15  -4 4661.46 251.402   1
  -2 -15  -5 3377.91 223.740   7
   2  15   5 3505.67 194.456   5
  -2 -15  -5 3355.00 189.109   2
  -2  15  -5 3576.18 221.757   1
  -2  15  -6 2141.30 178.147   1
   2  15   6 1954.42 153.355   5
  -2 -15  -6 2036.75 178.143   7
  -2 -15  -6 2224.97 157.436   2
  -2 -15  -7-34.1087 72.2422   7
   2  15   7-43.6112 59.2407   5
  -2  15  -7 115.582 76.9282   1
  -2 -15  -7 12.2369 47.0613   2
  -2 -15  -8 73.4947 66.3762   7
  -2  15  -8 175.907 83.6168   1
  -2 -15  -8 94.0095 63.3935   2
   2  15   8 55.0874 58.3497   5
  -2 -15  -9 2176.38 191.502   7
  -2 -15  -9 2328.57 175.351   2
   2  15   9 2142.22 172.305   5
  -2  15  -9 2234.39 185.702   1
   2  15  10 1938.89 166.854   5
  -2  15 -10 1845.50 172.244   1
  -2 -15 -10 1990.22 165.707   2
  -2 -15 -10 1888.90 178.755   7
  -2  15 -11 2007.60 182.999   1
   2  15  11 2584.11 204.242   5
  -2 -15 -11 2341.12 202.134   7
  -2 -15 -11 2285.22 180.583   2
  -2 -15 -12 12569.3 472.446   7
   2  15  12 11806.0 432.430   5
  -2  15 -12 12363.4 443.394   1
   2  15  13 4012.15 255.961   5
  -2  15 -13 4456.09 267.360   1
  -2 -15 -13 3918.29 271.643   7
   2  15  14 10412.8 426.295   5
  -2  15 -14 10379.8 413.074   1
  -2  15 -15 4916.72 285.153   1
   2  16 -14 69.9374 80.0567   1
   2  16 -13 7199.18 331.960   1
   2 -16 -13 7245.61 348.890   7
   2  16 -12 234.810 75.3028   1
   2 -16 -12 367.081 100.657   7
   2 -16 -11 1635.74 168.830   7
   2  16 -11 1497.71 158.149   1
   2  16 -10 129.620 75.7295   1
   2 -16 -10 129.107 84.8710   7
   2  16 -10 44.7406 73.2077   6
   2  16  -9 88.1610 71.4892   1
   2  16  -9 32.3189 63.3904   6
   2 -16  -9 260.453 95.0031   7
   2  16  -8-79.7713 76.2013   1
   2 -16  -8 137.514 84.0638   7
  -2  16   7 5618.55 296.665   1
   2 -16  -7 5853.39 294.968   7
   2  16  -7 5719.65 290.125   1
   2 -16  -6 150.321 79.6108   7
  -2  16   6 187.283 77.9279   1
   2  16  -6 180.224 91.4321   1
  -2  16   5 13539.7 460.090   1
   2  16  -5 13212.1 446.620   1
   2 -16  -5 13876.9 455.742   7
   2  16  -4 568.394 103.832   1
   2  16  -4 581.757 91.2444   5
   2 -16  -4 509.241 103.435   7
  -2  16   4 506.217 98.5161   1
   2 -16  -3 24268.3 625.189   7
  -2 -16   3 23417.7 616.887   7
   2  16  -3 24271.1 540.636   5
   2  16  -3 25218.8 639.474   1
  -2  16   3 23784.3 629.703   1
   2  16  -2 322.292 88.7966   1
  -2 -16   2 176.400 79.0760   7
  -2  16   2 309.430 89.1849   1
   2  16  -2 342.070 77.6408   5
   2 -16  -2 207.295 74.5002   7
   2  16  -1 23701.8 533.160   5
  -2 -16   1 23811.1 621.884   7
  -2  16   1 23565.3 620.911   1
   2  16  -1 23379.0 623.342   1
   2 -16  -1 24244.9 621.433   7
  -2  16   0 1270.05 145.915   1
  -2 -16   0 1145.37 143.619   7
   2  16   0 1021.33 106.311   5
   2  16   0 1220.54 146.499   1
   2 -16   0 1418.70 151.347   7
  -2  16  -1 7364.31 328.941   1
   2  16   1 7353.89 330.804   1
  -2 -16  -1 6574.79 310.741   7
  -2  16  -2 146.765 79.9003   1
  -2 -16  -2 192.174 95.3512   7
   2  16   2 236.781 70.8326   5
  -2  16  -3 9.62715 79.4347   1
  -2 -16  -3 31.7862 72.7514   7
  -2  16  -4-54.6948 71.6383   1
  -2 -16  -4-48.2137 79.6160   7
  -2  16  -5 3539.50 230.981   1
   2  16   5 3457.52 200.193   5
  -2 -16  -5 3363.79 231.914   7
   2  16   6 145.092 70.3163   5
  -2  16  -6 207.636 82.4033   1
  -2 -16  -6 138.599 73.4957   7
  -2 -16  -7 7549.27 348.699   7
  -2  16  -7 7298.14 337.846   1
   2  16   7 7652.56 309.422   5
  -2  16  -8 44.6131 71.0975   1
  -2 -16  -8 18.2027 68.5351   7
   2  16   8 79.2462 66.0760   5
  -2 -16  -9 8281.46 373.289   7
   2  16   9 7764.67 328.111   5
  -2  16  -9 8278.34 364.906   1
   2  16  10 189.664 92.3902   5
  -2  16 -10 90.2054 82.1964   1
  -2 -16 -11 4782.97 297.395   7
   2  16  11 4221.09 255.172   5
  -2  16 -11 4350.51 271.581   1
  -2  16 -12 121.049 75.4516   1
   2  17 -12 197.484 92.4085   1
   2  17 -11 1571.57 165.250   1
   2 -17 -10 4485.45 269.137   7
   2  17 -10 4476.45 266.088   1
   2  17  -9 5787.96 306.778   1
   2 -17  -9 6198.70 319.694   7
   2 -17  -8 3772.82 247.374   7
   2  17  -8 3638.50 239.896   1
   2 -17  -7 4880.19 280.880   7
   2  17  -7 4271.37 263.000   1
   2 -17  -6 2404.19 199.902   7
  -2  17   6 2598.68 211.014   1
   2  17  -6 2365.68 198.202   1
   2  17  -5 2537.77 203.135   1
   2 -17  -5 2720.14 208.439   7
  -2  17   5 2409.24 207.093   1
  -2  17   4 65.9546 85.2464   1
   2  17  -4 151.756 77.5912   1
   2 -17  -4 247.364 94.1084   7
   2  17  -3 429.581 102.787   1
  -2  17   3 557.839 116.862   1
  -2 -17   3 811.279 127.664   7
   2 -17  -3 349.220 94.4647   7
   2  17  -2 1486.20 161.456   1
  -2  17   2 1605.51 174.861   1
   2 -17  -2 1678.74 167.739   7
  -2 -17   2 1394.20 153.233   7
  -2 -17   1 420.881 117.210   7
  -2  17   1 519.930 108.278   1
   2  17  -1 258.382 91.5330   1
   2 -17  -1 325.429 95.3563   7
  -2 -17   0 2398.10 199.417   7
   2  17   0 2235.90 196.627   1
  -2  17   0 2423.60 201.688   1
  -2  17  -1 2874.44 215.688   1
  -2 -17  -1 2725.50 213.665   7
  -2  17  -2 4198.44 258.502   1
  -2 -17  -2 4838.01 280.028   7
  -2  17  -3 4874.77 280.882   1
  -2  17  -4 5668.69 306.706   1
  -2 -17  -4 5578.39 300.292   7
  -2  17  -5 2354.67 202.359   1
  -2 -17  -5 2686.64 216.095   7
  -2  17  -6 4392.82 269.339   1
  -2 -17  -6 4524.63 279.789   7
  -2  17  -7 43.2135 71.2503   1
  -2 -17  -7 132.760 73.1245   7
  -2  17  -8-75.9421 75.4085   1
  -2 -17  -8 123.864 93.7473   7
  -2  17  -9 816.318 129.018   1
   2 -18  -6 8222.81 377.050   7
   2  18  -6 6916.29 347.340   1
   2 -18  -5 595.906 120.124   7
   2  18  -5 579.328 113.254   1
  -2  18   5 637.635 123.297   1
  -2  18   4 13296.4 495.476   1
   2 -18  -4 13948.4 497.283   7
   2  18  -4 12840.5 481.054   1
  -2  18   3 626.127 120.934   1
   2 -18  -3 442.908 112.629   7
   2  18  -3 410.754 116.084   1
  -2 -18   2 16430.0 544.755   7
  -2  18   2 15241.6 528.505   1
   2  18  -2 16068.3 543.235   1
   2 -18  -2 15642.2 528.054   7
  -2 -18   1 39.6913 76.7057   7
   2 -18  -1 152.490 100.048   7
   2  18  -1-27.4553 75.3212   1
  -2  18   1-106.129 78.8544   1
  -2  18   0 9002.13 399.243   1
  -2 -18   0 9181.38 402.464   7
  -2  18  -1 854.642 138.345   1
  -2 -18  -1 978.767 142.190   7
  -2 -18  -2 2148.07 197.136   7
  -2  18  -2 1833.92 186.412   1
  -2 -18  -3 300.589 96.5262   7
  -2  18  -3 265.149 101.257   1
   3   0 -24 1070.89 149.352   3
   3   0 -23-66.2454 90.5292   3
   3   0 -22 2664.09 214.523   3
   3   0 -21 29.0482 65.5684   3
   3   0 -20 14762.8 472.282   3
   3   0 -19 46.5138 76.6265   3
   3   0 -18 540.919 96.3438   3
   3   0 -17 98.6631 71.6650   3
   3   0 -16 5126.61 234.340   3
   3   0 -16 4485.52 121.685   1
   3   0 -15 31.5819 55.4268   3
   3   0 -15 20.6226 18.6547   1
   3   0 -14 28816.5 584.482   3
   3   0 -13 21.4540 44.5375   3
   3   0 -12 58549.6 909.045   3
   3   0 -11 110.795 52.5379   3
   3   0 -10 92982.4 1249.77   3
   3   0 -10 91301.5 1068.67   1
   3   0  -9 159.414 46.9153   3
   3   0  -9 5.13620 7.69001   1
  -3   0   8 84206.3 1115.16   3
  -3   0   8 82991.7 1127.24   6
   3   0  -8 83101.1 1113.06   3
  -3   0   7 222.756 52.5053   6
  -3   0   7 251.474 53.2954   3
   3   0  -7 221.772 51.4822   3
  -3   0   6 53306.8 737.401   6
   3   0  -6 51770.2 721.269   3
  -3   0   6 52877.9 723.859   3
   3   0  -5 147.668 38.4347   3
  -3   0   5 65.3560 37.6583   5
  -3   0   5 181.257 41.9875   6
  -3   0   5 347.971 45.3186   3
   3   0  -5 215.143 44.0967   6
  -3   0   4 5111.65 125.949   5
   3   0  -4 4956.14 127.022   3
  -3   0   4 5201.70 129.283   3
   3   0  -4 5283.12 134.386   6
  -3   0   4 5352.79 135.235   6
   3   0  -3 13.7011 26.0114   5
  -3   0   3 33.9230 25.1152   5
   3   0  -3 46.9112 36.1679   6
   3   0  -3 51.2896 32.0694   3
  -3   0   3 28.8440 31.3935   3
   3   0  -2 66772.1 823.241   5
  -3   0   2 66620.6 825.165   3
  -3   0   2 66964.2 822.640   5
   3   0  -2 68935.9 827.320   3
  -3   0   1 11.4342 20.5283   3
  -3   0   1 42.0806 21.8929   2
   3   0  -1 14.6256 25.3698   5
   3   0  -1 37.5912 24.4457   3
  -3   0   1 22.2857 20.0434   5
   3   0   0 74784.8 900.917   5
  -3   0   0 74790.5 905.081   2
  -3   0   0 74030.6 900.809   3
  -3   0   0 74690.0 902.455   5
   3   0   0 73951.5 902.387   2
   3   0   1 7.72431 26.6075   5
  -3   0  -1 38.2906 27.4077   2
   3   0   1 4.68380 21.9608   2
  -3   0  -2 21013.6 327.323   2
   3   0   2 20775.3 323.145   2
   3   0   2 21049.0 320.502   5
   3   0   3-17.7982 38.1950   2
  -3   0  -3 73.3491 33.5379   2
   3   0   4 88307.4 1119.07   2
  -3   0  -4 87119.5 1122.03   2
  -3   0  -5 363.273 55.2630   2
   3   0   5 368.251 53.6640   2
   3   0   6 3646.65 135.566   2
  -3   0  -6 3445.76 137.203   2
   3   0   7 139.802 42.2696   2
  -3   0  -7 251.640 57.4080   2
  -3   0  -8 74.3040 42.9707   2
  -3   0  -9 15.6615 47.1236   2
  -3   0 -10 15136.1 351.187   3
  -3   0 -10 14285.8 363.043   2
  -3   0 -11-6.74719 52.2587   2
  -3   0 -11-55.6831 43.4514   3
  -3   0 -12 32733.4 621.016   3
  -3   0 -13 8.58221 49.6725   3
  -3   0 -14 11339.7 346.217   3
  -3   0 -15 43.1328 64.0702   3
  -3   0 -16 956.846 114.859   3
  -3   0 -17 0.55610 61.2136   3
  -3   0 -18 2544.80 187.536   3
  -3   0 -19 26.0358 69.8564   3
  -3   0 -20 7029.82 332.019   3
  -3   0 -21 8.81716 91.5798   3
  -3   0 -22 7576.20 370.434   3
  -3   0 -23-118.297 89.4362   3
   3  -1 -24 1226.43 157.377   3
   3   1 -24 1105.64 155.799   3
   3  -1 -23 1773.53 178.131   3
   3   1 -23 1651.89 176.860   3
   3   1 -22 231.196 87.4778   3
   3  -1 -22 160.680 79.1336   3
   3   1 -21 27.3528 70.9462   3
   3  -1 -21 57.0085 76.7715   3
   3  -1 -20 792.414 118.540   3
   3   1 -20 917.259 124.361   3
   3   1 -19 4950.12 260.307   3
   3  -1 -19 5185.23 262.931   3
   3  -1 -18 15364.8 452.121   3
   3   1 -18 14461.4 441.097   3
   3   1 -17 15008.4 433.970   3
   3  -1 -17 15304.5 435.034   3
   3  -1 -16 24354.1 381.124   1
   3   1 -16 25142.0 567.187   3
   3  -1 -16 25441.7 567.671   3
   3  -1 -15 8457.30 292.944   3
   3   1 -15 8565.78 296.279   3
   3  -1 -15 8259.95 175.375   1
   3  -1 -14 20609.6 464.827   3
   3   1 -14 20730.8 466.679   3
   3  -1 -14 18727.0 302.979   1
   3  -1 -13 12578.1 339.246   3
   3  -1 -13 12435.7 215.854   1
   3   1 -13 13090.8 345.475   3
   3   1 -12 29382.3 559.931   3
   3  -1 -12 29878.5 558.824   3
   3  -1 -12 29484.2 404.524   1
   3  -1 -11 5000.33 190.464   3
   3   1 -11 5463.27 197.856   3
   3  -1 -11 5339.02 110.974   1
   3  -1 -10 25250.4 340.134   1
   3  -1 -10 26088.7 475.724   3
   3   1 -10 26307.3 480.935   3
   3   1  -9 7131.32 208.016   3
   3  -1  -9 6912.99 118.122   1
   3  -1  -9 7350.40 209.889   3
  -3  -1   8 1302.53 86.3377   6
  -3   1   8 1245.54 86.7316   6
   3  -1  -8 1202.07 81.7620   3
   3   1  -8 1288.88 87.8639   3
  -3  -1   8 1242.10 81.7924   3
  -3   1   8 1266.97 82.9945   3
   3   1  -7 17069.6 325.712   6
   3   1  -7 15503.2 308.772   3
  -3  -1   7 16081.4 314.938   3
  -3   1   7 16074.9 307.403   3
  -3  -1   7 16033.0 309.524   5
  -3  -1   7 15700.0 317.661   6
  -3   1   7 15938.5 318.073   6
   3  -1  -7 16514.7 309.238   3
  -3  -1   6 1270.16 78.5013   3
   3   1  -6 1315.36 78.3633   6
   3   1  -6 1348.29 75.9208   3
  -3   1   6 1311.47 73.2970   3
  -3  -1   6 1372.96 79.2281   6
  -3  -1   6 1366.40 75.8691   5
   3  -1  -6 1311.87 73.6250   3
  -3   1   6 1324.27 76.7537   6
  -3   1   5 61777.7 812.102   3
  -3  -1   5 62240.8 826.253   3
  -3  -1   5 63334.7 822.470   5
  -3   1   5 61813.2 728.622   1
  -3   1   5 62643.6 826.049   6
   3   1  -5 62478.7 831.304   6
   3  -1  -5 63208.8 808.327   3
   3   1  -5 63508.4 826.367   3
   3   1  -4 33895.9 485.737   6
   3  -1  -4 33445.0 462.272   3
  -3   1   4 32596.0 462.976   3
   3   1  -4 32649.2 472.097   5
  -3   1   4 32862.2 473.617   6
  -3  -1   4 33613.3 402.350   1
  -3  -1   4 33622.4 475.752   5
   3   1  -4 33317.9 413.116   7
  -3  -1   4 32825.3 478.828   3
   3   1  -4 33894.6 481.687   3
  -3   1   4 33690.3 457.755   5
  -3  -1   3 15653.6 262.449   3
  -3   1   3 15842.7 241.100   5
   3   1  -3 15833.4 206.261   7
  -3  -1   3 15891.3 261.510   5
   3  -1  -3 15827.6 244.269   3
   3   1  -3 15799.4 265.788   3
   3   1  -3 16157.5 260.462   5
  -3   1   3 15695.6 253.861   6
  -3   1   3 15813.8 246.850   3
   3  -1  -3 16084.1 256.633   6
  -3   1   2 19533.2 279.901   3
  -3  -1   2 20318.4 302.681   5
  -3  -1   2 19789.9 303.819   3
  -3   1   2 19791.1 275.661   5
   3  -1  -2 20245.9 276.154   5
   3  -1  -2 19934.1 278.336   3
   3   1  -2 19562.8 305.119   3
  -3   1   2 19666.0 284.528   6
   3  -1  -2 19871.7 286.983   6
   3   1  -2 19931.0 300.863   5
  -3  -1   2 20143.5 251.967   7
   3  -1  -1 3302.93 72.8098   5
   3  -1  -1 3343.93 74.8762   6
  -3  -1   1 3176.23 91.2983   5
  -3  -1   1 3446.18 93.4016   2
   3   1  -1 3363.78 93.4445   5
  -3   1   1 3217.99 72.6298   5
   3   1  -1 3485.17 94.6768   3
  -3   1   1 3371.37 75.7982   2
   3  -1  -1 3180.16 73.4656   3
  -3  -1   1 3137.31 92.8232   3
  -3   1   1 3315.45 73.7785   3
  -3  -1   0 204.710 33.9511   2
   3  -1   0 272.314 25.6502   2
  -3  -1   0 214.091 32.3656   3
   3  -1   0 184.857 23.3281   5
   3   1   0 211.563 35.4474   5
  -3  -1   0 210.735 31.5825   5
   3   1   0 190.071 30.9166   2
  -3   1   0 177.960 20.9246   2
  -3  -1   0 177.460 17.9934   4
  -3   1   0 201.695 22.1681   3
  -3   1   0 193.881 20.5924   5
  -3   1  -1 2252.56 70.6949   2
   3   1   1 2379.18 82.2277   5
   3  -1   1 2387.92 67.2210   5
   3   1   1 2349.25 81.6829   2
  -3  -1  -1 2273.45 82.5597   2
   3  -1   1 2335.67 69.4864   2
  -3  -1  -1 2156.09 79.7549   5
   3   1   2 61.5060 36.1861   5
  -3   1  -2 91.6452 29.2982   2
  -3  -1  -2 144.417 34.1784   2
  -3   1  -2 79.9031 13.9368   4
   3   1   2 85.1474 31.6309   2
   3  -1   2 101.934 27.6318   2
  -3   1  -3 22644.6 358.233   2
   3  -1   3 22813.2 353.630   2
   3   1   3 22574.7 370.704   2
   3  -1   3 23471.5 297.122   4
  -3  -1  -3 22518.3 370.559   2
  -3   1  -4 11787.0 239.165   2
   3   1   4 11900.0 247.336   2
  -3  -1  -4 12158.6 250.980   2
   3  -1   4 12091.3 184.206   4
   3  -1   4 11524.9 231.839   2
  -3  -1  -5 89418.6 1201.99   2
   3  -1   5 94037.5 1190.81   2
   3   1   5 93370.7 1205.10   2
   3  -1   5 93276.6 1110.49   4
  -3   1  -5 92135.6 1194.39   2
  -3  -1  -6 30801.1 512.756   2
   3   1   6 30315.3 504.951   2
  -3   1  -6 30632.3 501.801   2
   3  -1   6 29781.5 494.343   2
   3  -1   7 41292.7 641.987   2
  -3   1  -7 40258.8 649.194   2
  -3  -1  -7 42003.3 660.142   2
  -3   1  -8 17010.1 343.616   3
  -3   1  -8 16352.7 360.091   2
  -3  -1  -8 16144.5 362.495   2
  -3   1  -9 23214.3 470.412   2
  -3   1  -9 23143.4 445.065   3
  -3  -1  -9 24129.9 481.904   2
  -3   1 -10 6425.09 214.111   3
  -3  -1 -10 6208.98 229.020   2
  -3   1 -11 9160.89 272.002   3
  -3  -1 -11 9318.03 281.870   3
  -3  -1 -11 8976.62 290.601   2
  -3  -1 -12 417.200 69.3083   3
  -3   1 -12 308.035 61.9433   3
  -3  -1 -12 482.628 80.9470   2
  -3  -1 -13 45.1976 48.4290   3
  -3   1 -13 127.847 62.0781   3
  -3   1 -14 5151.74 225.444   3
  -3  -1 -14 5226.39 230.104   3
  -3   1 -15 6330.78 260.946   3
  -3  -1 -15 6396.06 266.971   3
  -3  -1 -16 12749.4 399.245   3
  -3   1 -16 12346.8 390.789   3
  -3   1 -17 7130.76 300.146   3
  -3  -1 -17 7527.52 310.147   3
  -3  -1 -18 7707.53 325.755   3
  -3   1 -18 7214.37 313.652   3
  -3  -1 -19 12911.7 444.979   3
  -3   1 -19 12656.8 435.625   3
  -3   1 -20 10242.6 403.065   3
  -3  -1 -20 10893.8 420.201   3
  -3   1 -21 7796.75 364.021   3
  -3  -1 -21 7490.63 358.943   3
  -3   1 -22 3511.50 254.382   3
  -3  -1 -22 3428.07 246.692   3
  -3   1 -23 351.311 101.505   3
   3  -2 -24 238.724 100.547   3
   3   2 -24 248.354 108.590   3
   3   2 -23 6729.44 341.758   3
   3  -2 -23 5972.34 323.399   3
   3   2 -22 171.052 84.2129   3
   3  -2 -22 254.193 93.0595   3
   3   2 -21 15497.9 506.919   3
   3  -2 -21 16170.4 509.708   3
   3   2 -20 1618.90 156.395   3
   3  -2 -20 1404.28 150.850   3
   3   2 -19 7646.67 322.041   3
   3  -2 -19 7571.96 320.082   3
   3   2 -18 228.258 76.3146   3
   3  -2 -18 320.441 83.1752   3
   3  -2 -17 74.9092 63.3354   3
   3   2 -17 176.781 70.0354   3
   3   2 -16 442.090 87.1875   3
   3  -2 -16 293.234 75.8645   3
   3  -2 -15 4902.60 219.773   3
   3  -2 -15 4923.76 134.431   1
   3   2 -15 4795.63 219.127   3
   3  -2 -14 2114.87 141.006   3
   3  -2 -14 2062.43 80.9892   1
   3   2 -14 1863.10 134.635   3
   3  -2 -13 16711.0 278.765   1
   3  -2 -13 16711.0 401.219   3
   3   2 -13 17372.8 413.185   3
   3   2 -12 97.2940 53.2307   3
   3  -2 -12 99.3332 23.9203   1
   3  -2 -12 96.8672 49.2863   3
   3   2 -11 67800.0 1011.70   3
   3  -2 -11 69658.8 856.425   1
   3  -2 -11 67367.6 1000.81   3
   3   2 -10 7948.05 234.597   3
   3  -2 -10 8056.70 151.825   1
   3  -2 -10 8129.07 230.605   3
   3   2  -9 78433.3 1081.33   3
   3  -2  -9 78263.5 943.850   1
   3  -2  -9 76463.1 1066.18   3
   3   2  -9 79554.2 1089.70   6
  -3   2   9 78136.6 1077.62   2
   3  -2  -8 1776.86 94.3506   3
  -3  -2   8 1597.01 94.9964   3
   3   2  -8 1847.54 102.382   6
  -3   2   8 1873.14 100.457   3
   3   2  -8 1775.40 99.6962   3
   3   2  -7 41566.8 633.761   3
  -3  -2   7 43861.9 642.120   3
   3   2  -7 42423.6 518.227   1
  -3   2   7 42468.2 625.194   3
   3   2  -7 42112.6 639.240   6
  -3  -2   7 41906.7 632.432   5
   3  -2  -7 43283.8 620.162   3
  -3  -2   6 569.646 54.7937   3
   3   2  -6 557.315 58.2207   6
  -3  -2   6 578.312 53.3699   5
  -3   2   6 552.258 52.5778   3
   3  -2  -6 533.168 48.8522   3
  -3   2   6 520.520 32.6388   1
   3   2  -6 573.974 27.6793   1
   3   2  -6 458.517 51.5693   3
   3   2  -5 14281.1 277.770   3
  -3  -2   5 14642.9 278.765   3
  -3   2   5 14788.6 219.554   1
   3  -2  -5 14768.6 259.986   3
  -3  -2   5 14495.9 275.438   5
   3   2  -5 15188.6 211.509   1
   3   2  -5 15708.0 280.790   5
   3   2  -5 14897.0 232.720   7
   3   2  -5 15129.5 285.648   6
  -3   2   5 14474.8 260.389   3
   3   2  -4 2186.80 63.3025   7
  -3  -2   4 2227.37 59.4363   1
  -3  -2   4 2171.57 87.5989   5
   3   2  -4 2155.12 87.9037   5
   3  -2  -4 2192.62 74.4287   3
   3   2  -4 2327.66 94.3494   3
  -3   2   4 2165.51 75.6141   3
  -3  -2   4 2169.64 87.5560   3
   3  -2  -3 2641.52 64.9218   7
  -3  -2   3 2530.13 89.6069   5
   3  -2  -3 2730.77 74.9703   3
   3   2  -3 2700.43 97.0740   3
   3   2  -3 2736.30 68.0649   7
  -3  -2   3 2688.99 93.9864   3
  -3  -2   3 2715.24 68.9462   7
  -3   2   3 2730.60 84.2342   6
  -3   2   3 2605.03 69.7636   5
  -3  -2   3 2756.19 71.7505   1
  -3   2   3 2644.93 75.2383   3
   3   2  -3 2669.37 92.5955   5
   3  -2  -2 7.70716 16.2887   7
  -3  -2   2 39.8831 29.2873   3
   3   2  -2 54.5580 34.5491   5
  -3   2   2 38.9030 16.5730   6
  -3   2   2 25.0536 13.6955   3
  -3  -2   2 8.84625 25.6449   4
  -3  -2   2 17.4562 21.7743   1
  -3  -2   2 31.2705 27.0135   5
   3  -2  -2 16.3815 17.1955   3
   3   2  -2 26.1385 32.7913   3
  -3   2   2 16.9290 16.2882   7
  -3   2   2 3.96618 14.1095   5
  -3  -2   2 24.0857 18.9356   7
  -3   2   1 127515. 1467.67   7
  -3  -2   1 123512. 1482.30   4
   3  -2  -1 127070. 1439.07   5
   3   2  -1 128638. 1512.55   5
  -3  -2   1 126890. 1511.41   2
  -3   2   1 125831. 1439.68   5
  -3   2   1 124505. 1442.04   3
  -3  -2   1 126089. 1514.45   5
   3   2  -1 127126. 1518.17   3
  -3  -2   1 123515. 1516.36   3
   3  -2  -1 127208. 1440.82   3
  -3   2   1 125842. 1452.61   6
  -3  -2   0 39805.2 546.418   2
  -3  -2   0 39613.8 548.201   5
   3   2   0 41212.4 547.427   2
   3  -2   0 39618.5 478.052   5
   3  -2   0 39975.5 485.655   2
   3   2   0 37434.9 541.414   5
  -3  -2   0 40270.5 504.960   4
  -3   2   0 39952.2 488.722   2
  -3  -2   0 39316.3 547.994   3
   3   2   0 40847.8 507.556   4
   3  -2   1 31145.8 388.865   5
  -3  -2  -1 29706.2 447.100   5
   3  -2   1 30666.7 397.092   2
   3   2   1 30761.2 446.481   2
  -3   2  -1 30576.6 401.384   2
   3   2   1 30201.5 393.410   4
   3   2   1 31122.4 447.674   5
  -3  -2  -1 30380.3 448.043   2
  -3   2  -2 2751.10 71.6305   4
   3  -2   2 2619.95 78.4490   2
   3   2   2 2733.50 99.6746   5
   3   2   2 2713.62 98.6881   2
  -3   2  -2 2683.78 83.0042   2
  -3  -2  -2 2796.51 102.807   2
  -3  -2  -3 44225.7 625.612   2
   3  -2   3 43389.0 584.708   2
   3   2   3 41997.4 616.084   2
  -3   2  -3 44403.9 557.735   4
   3  -2   3 43849.6 554.028   4
  -3   2  -3 43779.0 591.601   2
   3   2   3 43921.2 620.107   5
   3   2   4 2301.69 100.592   2
   3  -2   4 2944.93 84.0809   4
  -3   2  -4 2260.42 92.8575   2
  -3  -2  -4 2049.26 103.428   2
   3  -2   4 2113.78 86.8012   2
   3  -2   5 58217.0 801.969   2
   3   2   5 58406.6 828.741   2
  -3   2  -5 59664.5 782.379   3
   3  -2   5 59463.1 749.036   4
  -3  -2  -5 59184.5 833.840   2
  -3   2  -5 58497.8 808.356   2
   3   2   6 4415.34 157.986   2
  -3  -2  -6 4825.74 168.305   2
  -3   2  -6 4689.44 142.749   3
   3  -2   6 4746.27 123.290   4
  -3   2  -6 4714.33 155.767   2
   3  -2   6 4659.44 151.288   2
   3  -2   7 90.1488 33.7631   2
  -3  -2  -7 87.0676 46.5380   2
  -3   2  -7 114.417 37.5459   3
   3  -2   7 91.9754 25.4895   4
  -3  -2  -8 24213.1 473.481   2
   3  -2   8 24166.3 397.175   4
  -3   2  -8 24709.7 437.606   3
  -3   2  -9 3505.19 146.476   3
   3  -2   9 3595.40 129.300   4
  -3  -2  -9 3830.54 174.316   2
   3  -2  10 2948.08 122.585   4
  -3   2 -10 2866.72 140.132   3
  -3  -2 -10 3070.07 158.825   2
  -3   2 -11 24539.6 490.026   3
  -3  -2 -11 24811.6 529.271   2
  -3  -2 -12 1406.99 123.888   2
  -3   2 -12 1326.86 104.393   3
  -3   2 -13 14946.2 386.629   3
  -3  -2 -13 14675.6 399.298   3
  -3  -2 -13 15425.8 422.858   2
  -3  -2 -14 8847.91 308.398   3
  -3   2 -14 8543.41 294.541   3
  -3   2 -15 4816.13 226.848   3
   3  -2  15 4643.20 192.820   4
  -3  -2 -15 4599.63 228.112   3
  -3  -2 -16 575.746 97.5151   3
   3  -2  16 624.702 81.1097   4
  -3   2 -16 586.122 87.5831   3
  -3  -2 -17 116.355 63.5412   3
   3  -2  17 159.082 57.3857   4
  -3   2 -17 75.2828 55.3379   3
  -3   2 -18 60.6766 59.4725   3
  -3  -2 -18 10.8185 65.3774   3
   3  -2  18 2.65704 47.2474   4
  -3   2 -19 1822.54 163.077   3
  -3  -2 -19 1383.38 151.974   3
   3  -2  19 1572.20 133.513   4
  -3   2 -20 248.008 79.4223   3
  -3  -2 -20 168.381 72.7313   3
   3  -2  20 312.501 77.0451   4
  -3   2 -21 9566.24 401.288   3
  -3  -2 -21 9331.83 404.568   3
  -3   2 -22 616.034 119.870   3
  -3  -2 -22 507.523 111.817   3
  -3   2 -23 15304.4 543.347   3
  -3  -3  25 4419.69 294.447   4
   3   3 -24 1784.84 190.332   3
   3  -3 -24 1681.58 179.366   3
   3   3 -23 278.913 94.4292   3
   3  -3 -23 108.117 74.4761   3
   3  -3 -22 52.6262 67.0826   3
   3   3 -22 213.893 102.106   3
   3  -3 -21 48.3220 74.0768   3
   3   3 -21-11.6214 67.6382   3
   3   3 -20 1333.86 147.866   3
   3  -3 -20 1586.45 158.437   3
   3   3 -19 2932.78 200.496   3
   3  -3 -19 3021.41 203.469   3
   3   3 -18 15447.1 461.330   3
   3  -3 -18 15741.9 458.082   3
   3   3 -17 7601.25 303.381   3
   3  -3 -17 7784.23 301.868   3
   3   3 -16 23323.9 548.669   3
   3  -3 -16 22846.5 538.267   3
   3   3 -15 26838.1 583.640   3
   3  -3 -15 26937.9 430.891   1
   3  -3 -15 27787.0 582.645   3
   3  -3 -14 29823.0 462.206   1
   3  -3 -14 31054.3 607.317   3
   3   3 -14 31450.8 619.660   3
   3  -3 -13 7469.98 253.208   3
   3  -3 -13 6885.04 166.395   1
   3   3 -13 7127.94 252.395   3
   3   3 -12 9031.67 276.767   3
   3  -3 -12 8962.44 189.767   1
   3  -3 -12 9006.17 270.722   3
   3  -3 -11 4762.84 182.294   3
   3   3 -11 4752.27 187.183   3
   3  -3 -11 4535.05 122.635   1
   3   3 -10 289.552 53.9491   3
   3  -3 -10 464.716 68.7379   3
   3  -3 -10 414.039 37.9909   1
   3   3 -10 354.803 57.4384   6
   3   3  -9 1126.68 85.0088   3
   3   3  -9 1004.38 83.7623   6
   3  -3  -9 1003.78 80.3050   3
  -3   3   9 1149.75 82.9831   2
   3  -3  -8 45693.8 681.632   3
   3   3  -8 45234.0 701.048   6
  -3   3   8 45990.9 685.978   2
   3   3  -8 44711.8 701.244   3
   3   3  -8 47318.9 589.569   1
   3  -3  -7 39.8893 34.7447   3
  -3   3   7 75.0442 23.7858   1
   3   3  -7 47.1631 17.0615   1
   3   3  -7 139.180 44.1373   3
   3   3  -7 61.3589 39.1354   6
  -3   3   7 64.1863 32.3546   2
   3   3  -7 76.5664 26.0913   7
  -3  -3   7 23.3763 30.6059   5
  -3  -3   7 92.4458 38.6467   3
   3  -3  -6 38898.7 552.071   3
  -3  -3   6 36718.7 571.941   5
  -3  -3   6 38932.6 583.566   3
  -3   3   6 37550.2 549.147   2
  -3   3   6 38124.1 511.045   1
   3   3  -6 37252.9 527.846   7
   3   3  -6 38573.5 582.538   3
   3   3  -6 38026.3 495.861   1
   3   3  -6 39147.1 587.001   6
   3  -3  -5 36041.7 506.172   3
   3   3  -5 35155.8 491.047   7
  -3   3   5 36493.1 484.847   1
   3   3  -5 35690.3 543.658   3
   3   3  -5 36416.5 537.850   5
  -3   3   5 35490.0 502.800   2
   3   3  -5 35849.4 473.322   1
  -3  -3   5 36806.7 545.653   3
  -3  -3   5 35644.5 539.022   5
   3   3  -4 49561.2 631.082   1
   3   3  -4 49090.5 637.490   7
  -3  -3   4 48705.7 681.638   5
  -3  -3   4 49106.5 628.010   1
   3  -3  -4 50355.1 638.284   3
   3   3  -4 49762.0 681.155   5
  -3  -3   4 47976.0 686.039   4
  -3  -3   4 48909.3 636.915   7
   3   3  -4 48860.4 686.622   3
  -3  -3   4 50676.8 691.640   3
   3  -3  -4 49830.6 631.383   7
   3  -3  -3 1976.52 61.3145   3
  -3  -3   3 1981.46 84.1055   5
  -3  -3   3 1934.18 70.1393   1
  -3  -3   3 1955.43 68.8598   7
  -3  -3   3 1962.61 85.0777   4
   3   3  -3 1963.08 87.4241   3
   3   3  -3 1972.56 67.7010   7
   3  -3  -3 1838.75 64.0593   7
   3   3  -3 1887.34 87.3812   5
  -3  -3   3 2012.78 88.9215   3
   3   3  -3 1998.23 71.6492   1
   3  -3  -2 59296.7 702.688   3
  -3   3   2 58208.7 692.395   5
   3  -3  -2 59566.1 735.634   7
  -3  -3   2 58091.3 741.030   7
  -3  -3   2 60522.9 769.217   4
  -3  -3   2 58053.8 778.273   5
  -3   3   2 59089.0 736.582   7
   3   3  -2 60668.9 787.072   3
   3   3  -2 58984.0 776.482   5
  -3  -3   2 59495.9 753.951   1
  -3  -3   2 59823.6 788.883   3
  -3  -3   1 9943.00 204.722   5
   3  -3  -1 9736.05 177.383   7
  -3  -3   1 9809.67 201.795   2
  -3  -3   1 9787.01 186.832   4
  -3   3   1 9801.07 177.427   7
   3   3  -1 10037.4 203.066   5
  -3  -3   1 9658.09 192.466   1
   3   3  -1 10084.5 189.590   4
  -3  -3   1 9851.48 207.105   3
  -3  -3   0 46447.1 641.781   5
   3   3   0 45711.7 633.620   2
   3   3   0 46442.9 637.713   5
  -3  -3   0 46256.7 606.010   4
   3   3   0 47807.9 608.944   4
  -3  -3   0 46227.7 638.792   2
  -3  -3   0 47648.7 647.793   3
  -3   3   0 46831.0 610.675   7
  -3  -3  -1 57075.6 771.837   5
  -3   3  -1 58212.4 694.242   2
   3   3   1 58373.4 771.018   5
   3  -3   1 58177.9 689.496   2
  -3  -3  -1 56525.5 767.980   2
  -3   3  -1 57174.0 745.132   7
   3   3   1 56249.4 723.478   4
   3   3   1 57360.3 766.797   2
  -3   3  -2 7401.90 152.294   4
  -3  -3  -2 7842.55 185.108   2
  -3   3  -2 7498.65 122.804   3
  -3   3  -2 7642.39 146.193   2
   3   3   2 7590.26 180.396   2
   3   3   2 7349.83 180.840   5
   3  -3   2 7525.10 140.955   2
  -3  -3  -3 20474.9 364.359   2
   3   3   3 20837.6 365.422   5
  -3   3  -3 21070.2 298.042   3
   3   3   3 21040.2 363.572   2
   3  -3   3 20413.7 317.360   2
  -3   3  -3 21295.6 321.175   4
   3   3   4 31159.0 503.198   2
   3  -3   4 32065.4 467.116   2
  -3   3  -4 31649.6 454.588   4
   3  -3   4 31534.7 414.149   6
  -3   3  -4 31726.6 443.519   3
   3   3   4 32842.6 513.982   5
   3  -3   4 31781.1 451.162   4
  -3  -3  -4 32589.7 512.721   2
   3  -3   5 7695.68 186.641   2
   3   3   5 8018.75 212.415   2
  -3   3  -5 7736.13 174.306   3
   3  -3   5 7761.42 170.265   4
  -3  -3  -5 8108.54 218.354   2
   3  -3   5 7836.11 155.839   6
   3  -3   6 94401.3 1169.25   6
  -3   3  -6 92661.0 1192.98   3
   3  -3   6 96272.1 1225.19   2
   3  -3   6 93462.8 1177.65   4
  -3  -3  -6 95466.9 1267.80   2
  -3  -3  -7 9856.39 266.438   2
   3  -3   7 9889.55 245.278   2
  -3   3  -7 10030.7 231.633   3
   3  -3   7 9701.83 213.436   4
   3  -3   7 10068.7 217.765   6
   3  -3   8 11371.5 254.689   6
  -3  -3  -8 11823.1 308.779   2
   3  -3   8 12098.8 252.037   4
  -3   3  -8 11786.6 270.672   3
   3  -3   9 11942.3 278.296   6
  -3   3  -9 12965.0 296.996   3
  -3  -3  -9 12067.9 325.763   2
   3  -3   9 12418.4 268.555   4
   3  -3  10 6516.41 204.458   6
  -3  -3 -10 7113.66 248.934   2
  -3   3 -10 6636.58 215.429   3
   3  -3  10 6702.04 195.760   4
   3  -3  11 13.6493 33.8036   4
  -3  -3 -11 78.9646 55.8898   2
  -3   3 -11 115.275 47.2926   3
   3  -3  12 2799.35 134.900   4
  -3   3 -12 2933.90 155.436   3
  -3  -3 -12 2867.91 171.624   2
  -3   3 -13 1563.58 121.254   3
  -3  -3 -13 1667.99 139.337   2
   3  -3  13 1668.93 109.967   4
  -3   3 -14 3485.25 186.595   3
  -3  -3 -14 3757.57 203.211   3
   3  -3  14 3510.06 164.824   4
  -3  -3 -14 3488.15 205.748   2
  -3  -3 -15 3905.97 214.233   3
   3  -3  15 3942.59 180.608   4
  -3   3 -15 3999.93 209.561   3
  -3   3 -16 20825.6 527.766   3
  -3  -3 -16 21345.3 548.391   3
   3  -3  16 21857.1 483.938   4
  -3   3 -17 8586.00 331.336   3
  -3  -3 -17 8894.15 345.665   3
   3  -3  17 9032.13 298.517   4
   3  -3  18 16503.7 435.013   4
  -3  -3 -18 16199.7 497.614   3
  -3   3 -18 16519.5 488.111   3
  -3   3 -19 8172.76 344.564   3
  -3  -3 -19 8814.80 370.089   3
   3  -3  19 8511.32 309.745   4
  -3   3 -20 8572.53 365.956   3
  -3  -3 -20 8507.22 375.168   3
   3  -3  20 8322.68 316.311   4
  -3   3 -21 4388.71 271.020   3
  -3  -3 -21 5040.60 295.123   3
  -3   3 -22 2493.55 210.666   3
  -3  -3 -22 2738.75 229.811   3
  -3   3 -23 2333.87 214.087   3
  -3  -4  24 2520.85 218.953   4
   3  -4 -24 2670.76 225.632   3
   3   4 -24 2526.61 223.793   3
   3  -4 -23 3076.33 237.188   3
  -3  -4  23 3363.43 249.976   4
   3   4 -23 3647.82 262.630   3
   3   4 -22 14426.1 507.544   3
   3  -4 -22 14435.0 502.974   3
  -3  -4  22 14612.5 512.731   4
   3   4 -21 4039.41 255.186   3
  -3  -4  21 4132.90 261.436   4
   3  -4 -21 3789.43 242.799   3
   3  -4 -20 8090.85 344.239   3
   3   4 -20 7527.60 337.879   3
   3  -4 -19 5685.44 278.578   3
   3   4 -19 5657.73 280.982   3
   3   4 -18 2290.48 174.330   3
   3  -4 -18 2628.14 182.973   3
   3  -4 -17 4380.48 226.444   3
   3   4 -17 4553.63 234.869   3
   3   4 -16 591.959 92.7811   3
   3  -4 -16 836.806 108.224   3
   3   4 -15 284.223 70.3930   3
   3  -4 -15 294.729 67.8701   3
   3   4 -14 2924.11 170.962   3
   3  -4 -14 2897.80 114.224   1
   3  -4 -14 2860.64 164.524   3
   3  -4 -13 112.872 52.6713   3
   3  -4 -13 51.2667 31.2866   1
   3   4 -13-2.12694 52.5343   3
   3  -4 -12 23257.7 480.822   3
   3   4 -12 23334.5 492.168   3
   3  -4 -12 23835.2 389.578   1
   3  -4 -11 2206.07 125.069   3
   3   4 -11 2357.44 134.294   3
   3   4 -11 2572.27 139.169   6
   3  -4 -11 2355.15 94.4337   1
   3   4 -10 50621.3 793.988   3
   3  -4 -10 50814.2 775.587   3
   3   4 -10 49986.7 789.810   6
   3   4  -9 10029.0 235.567   7
   3  -4  -9 10380.3 256.620   3
  -3   4   9 10155.7 258.677   2
   3   4  -9 10127.0 270.248   3
   3   4  -9 10370.1 270.602   6
   3   4  -8 40464.4 639.695   6
   3   4  -8 40376.1 638.394   3
   3   4  -8 38816.3 585.688   7
   3   4  -8 39470.1 539.385   1
  -3  -4   8 39528.8 656.085   4
  -3   4   8 38651.4 609.332   2
  -3   4   8 40269.2 561.941   1
   3  -4  -8 39731.0 610.684   3
   3  -4  -7 17109.9 319.758   3
   3   4  -7 17479.9 349.198   6
   3   4  -7 17207.0 278.304   1
   3   4  -7 16988.8 308.264   7
  -3  -4   7 17208.0 359.411   4
  -3   4   7 17455.8 321.272   2
  -3   4   7 16988.5 291.267   1
   3   4  -7 16046.8 341.578   3
   3   4  -6 12295.0 273.000   3
   3   4  -6 12009.5 217.601   1
   3  -4  -6 11441.7 242.521   3
  -3  -4   6 12233.3 268.777   3
  -3   4   6 12105.3 228.560   1
  -3   4   6 12140.0 239.636   2
   3   4  -6 12351.3 268.612   5
  -3  -4   6 12078.9 267.058   5
   3   4  -6 12014.0 238.052   7
  -3  -4   6 12587.3 281.876   4
  -3  -4   5 91.1944 35.1590   5
   3   4  -5 61.5068 38.8686   5
  -3  -4   5 84.4026 35.0061   3
  -3   4   5 43.4005 25.8542   1
  -3   4   5 45.2891 22.9015   2
   3  -4  -5 40.4456 25.2940   3
  -3  -4   5 115.604 38.9351   4
   3   4  -5 40.2373 35.3554   3
   3   4  -5 65.3528 27.3826   1
   3   4  -5 95.5874 26.2584   7
   3   4  -4 19070.1 336.353   5
   3   4  -4 18483.8 307.809   7
  -3  -4   4 18305.1 334.014   5
  -3  -4   4 18800.5 342.121   4
   3  -4  -4 18583.3 292.902   3
  -3   4   4 19114.9 282.332   2
   3   4  -4 18345.9 300.721   1
   3   4  -4 19375.6 344.874   3
  -3  -4   4 19341.9 343.786   3
  -3  -4   4 18832.3 308.602   7
   3  -4  -4 18689.8 302.461   7
  -3   4   3 1000.71 38.4744   2
   3   4  -3 1012.51 69.7026   3
  -3  -4   3 956.345 56.1428   1
   3   4  -3 1073.27 57.3476   7
  -3  -4   3 1069.81 67.6478   4
  -3  -4   3 1020.24 66.1467   5
   3  -4  -3 1078.98 46.1029   3
  -3  -4   3 949.922 66.6208   3
   3   4  -3 957.973 58.6887   1
  -3  -4   3 959.373 56.4983   7
   3  -4  -3 979.209 55.5162   7
   3   4  -3 996.208 66.9626   5
   3   4  -2 17461.8 309.688   5
  -3  -4   2 17732.2 314.012   5
   3  -4  -2 17606.7 237.642   3
  -3  -4   2 17337.5 296.092   1
   3   4  -2 17407.3 298.115   1
  -3  -4   2 17354.3 304.691   4
   3   4  -2 18141.1 310.542   4
   3   4  -2 17253.4 315.201   3
  -3  -4   2 17765.5 319.299   3
  -3   4   2 17217.9 284.483   7
  -3  -4   2 16281.2 284.467   7
   3  -4  -2 17825.5 285.667   7
  -3  -4   1 63.6719 29.5869   5
  -3  -4   1 91.3975 30.8646   7
  -3   4   1 101.133 23.1873   7
   3   4  -1 77.9985 38.6584   5
  -3  -4   1 29.8181 33.2373   2
  -3  -4   1 85.2871 31.0520   4
  -3  -4   1 112.202 32.1259   1
  -3  -4   1 95.2196 31.5463   3
   3  -4  -1 145.113 31.2459   7
   3   4  -1 70.6326 26.0528   4
  -3  -4   0 114412. 1431.57   5
   3   4   0 113662. 1400.81   4
   3   4   0 118804. 1429.98   5
  -3  -4   0 113135. 1421.65   1
  -3  -4   0 113449. 1434.87   3
  -3  -4   0 118634. 1431.98   2
  -3   4   0 114598. 1403.57   7
   3   4   1 1512.72 69.7217   4
  -3  -4  -1 1637.63 83.8773   5
   3   4   1 1630.67 83.9373   5
  -3  -4  -1 1567.21 81.1792   1
  -3  -4  -1 1614.09 82.7494   2
  -3   4  -1 1561.89 73.7593   7
   3   4   1 1435.14 75.9235   2
   3  -4   1 1628.20 43.1712   2
  -3   4  -2 105983. 1259.95   7
   3  -4   2 99945.0 1178.59   2
   3   4   2 101124. 1271.39   5
  -3  -4  -2 96583.3 1266.61   1
  -3  -4  -2 97928.4 1271.37   5
  -3   4  -2 98222.1 1148.31   3
  -3   4  -2 98596.0 1229.37   4
   3   4   2 99179.1 1263.97   2
  -3  -4  -2 101678. 1269.44   2
  -3   4  -3 3675.67 84.9352   3
   3   4   3 3593.28 133.283   5
   3   4   3 3642.49 129.314   2
   3  -4   3 3399.27 97.1852   2
  -3  -4  -3 3908.56 138.860   2
  -3   4  -3 3576.85 112.322   4
   3   4   4 54042.1 776.515   5
  -3   4  -4 53905.1 684.988   3
  -3  -4  -4 52668.1 771.779   2
   3  -4   4 52244.1 712.546   2
   3   4   4 54224.5 772.467   2
  -3   4  -4 53665.1 724.412   4
   3  -4   5 412.427 47.8988   4
  -3   4  -5 141.740 29.9093   3
   3  -4   5 368.345 42.3360   2
   3   4   5 156.716 50.6476   5
  -3  -4  -5 227.359 48.4736   2
  -3   4  -5 141.430 31.2899   4
   3  -4   6 5626.11 157.792   4
  -3   4  -6 5506.70 151.618   3
   3  -4   6 5935.61 169.558   2
  -3  -4  -6 5429.66 188.432   2
   3  -4   7 2128.33 105.417   2
  -3   4  -7 1903.89 94.8039   3
   3  -4   7 1951.82 93.1396   4
  -3  -4  -7 1957.54 117.296   2
   3  -4   7 1952.82 84.7715   6
   3  -4   8 3512.29 125.704   6
   3  -4   8 3583.35 133.333   4
  -3  -4  -8 3356.31 158.501   2
  -3   4  -8 3396.21 137.015   3
  -3   4  -9 8597.72 237.581   3
   3  -4   9 8842.58 225.774   6
   3  -4   9 9171.57 231.809   4
  -3  -4  -9 8901.12 278.311   2
   3  -4  10 20302.7 403.070   6
  -3   4 -10 20608.4 420.657   3
   3  -4  10 20737.5 400.078   4
  -3  -4 -10 20823.9 469.369   2
  -3   4 -11 5840.55 211.223   3
   3  -4  11 5511.07 189.000   4
  -3  -4 -11 5773.57 235.840   2
  -3   4 -12 20694.4 455.446   3
   3  -4  12 20208.9 420.998   4
  -3  -4 -12 21094.5 501.666   2
  -3  -4 -13 18643.6 484.979   2
  -3   4 -13 18652.7 443.468   3
   3  -4  13 18878.4 411.567   4
  -3   4 -14 16372.6 426.626   3
   3  -4  14 16866.2 394.688   4
  -3  -4 -14 16059.5 457.651   2
  -3  -4 -15 12461.6 398.729   3
  -3  -4 -15 12086.4 405.890   2
   3  -4  15 12693.1 345.962   4
  -3   4 -15 12972.2 383.479   3
   3  -4  16 11648.8 338.828   4
  -3  -4 -16 11582.9 391.629   3
  -3   4 -16 11471.8 372.845   3
   3  -4  17 856.108 96.7059   4
  -3  -4 -17 729.247 105.963   3
  -3   4 -17 814.195 115.060   3
  -3   4 -18 98.3377 75.3338   3
   3  -4  18 35.6138 50.6114   4
  -3  -4 -18 91.3020 73.6089   3
  -3  -4 -19 416.143 96.5482   3
  -3   4 -19 549.606 103.120   3
   3  -4  19 557.536 93.2165   4
  -3   4 -20 4386.68 262.974   3
  -3  -4 -20 4553.15 275.903   3
   3  -4  20 4352.61 229.957   4
  -3  -4 -21-26.9713 81.7415   3
  -3   4 -21 74.7959 72.2320   3
  -3  -4 -22 4580.04 292.324   3
  -3   4 -22 5033.24 297.157   3
  -3   4 -23 976.435 154.197   3
  -3  -5  24 85.9868 79.8493   4
   3   5 -24 122.582 90.2774   3
   3   5 -23 974.854 148.085   3
   3  -5 -23 885.910 144.394   3
  -3  -5  23 1244.85 159.605   4
   3   5 -22 1010.83 152.919   3
   3  -5 -22 859.105 130.074   3
  -3  -5  22 1143.02 154.732   4
   3   5 -21-39.5548 79.6784   3
   3  -5 -21-29.0174 73.6597   3
  -3  -5  21-3.69726 69.9251   4
   3  -5 -20 410.211 99.3425   3
  -3  -5  20 428.273 102.121   4
   3   5 -20 378.276 92.5557   3
  -3  -5  19 6547.19 315.733   4
   3  -5 -19 6734.74 304.194   3
   3   5 -19 6415.35 305.421   3
  -3  -5  18 1877.86 163.097   4
   3   5 -18 1779.30 157.228   3
   3  -5 -18 1932.29 161.276   3
   3  -5 -17 9053.35 330.533   3
  -3  -5  17 9108.20 354.640   4
   3   5 -17 8890.47 335.216   3
  -3  -5  16 6739.42 292.636   4
   3  -5 -16 6573.27 269.516   3
   3   5 -16 6183.66 268.046   3
   3  -5 -15 34040.7 673.346   3
  -3  -5  15 33441.8 710.319   4
   3   5 -15 32812.6 678.416   3
   3   5 -14 9730.76 316.784   3
  -3  -5  14 8910.86 321.829   4
   3  -5 -14 9672.90 305.772   3
   3  -5 -13 12615.0 344.522   3
  -3  -5  13 12261.0 371.137   4
   3  -5 -13 12205.8 270.094   1
   3   5 -13 12687.0 355.284   3
   3  -5 -12 5782.73 215.770   3
  -3  -5  12 5496.53 234.004   4
   3   5 -12 5969.55 228.488   3
   3   5 -12 6307.87 230.111   6
   3   5 -11 114.696 51.4251   6
   3  -5 -11 290.709 61.6468   3
  -3  -5  11 209.749 56.6507   4
   3   5 -11 159.679 50.5258   3
   3  -5 -10 104.963 43.4174   3
   3   5 -10 87.5006 45.9836   3
   3   5 -10 146.828 54.5113   6
  -3  -5  10 151.454 53.8970   4
   3  -5  -9 15890.0 337.688   3
  -3   5   9 16507.1 345.497   2
  -3  -5   9 15859.5 377.505   4
   3   5  -9 16391.8 361.615   6
   3   5  -9 15967.8 286.637   1
   3   5  -9 15549.9 357.322   3
   3   5  -8 149.004 51.0112   6
  -3   5   8 104.712 31.5180   1
   3   5  -8 146.049 29.4241   1
   3  -5  -8 171.871 42.5928   3
  -3   5   8 125.310 38.5077   2
   3   5  -8 67.2340 40.3742   3
  -3  -5   8 99.3566 47.4892   4
   3   5  -7 45351.9 624.279   1
  -3   5   7 44010.4 649.651   2
  -3  -5   7 45160.6 714.463   4
   3  -5  -7 45451.4 656.168   3
   3   5  -7 45088.3 657.375   7
  -3   5   7 43939.4 637.111   1
   3   5  -7 44695.6 694.647   3
   3   5  -6 5557.03 173.571   5
   3  -5  -6 5699.27 154.173   3
   3   5  -6 5663.20 179.534   3
  -3  -5   6 5447.34 182.561   4
  -3   5   6 5443.93 152.860   1
  -3   5   6 5362.39 146.450   2
   3   5  -6 5693.69 147.334   1
   3   5  -6 5503.15 158.052   7
   3   5  -5 84419.6 1098.12   5
   3   5  -5 83219.6 1050.79   1
   3  -5  -5 82932.9 1061.39   7
  -3   5   5 82463.4 1061.64   1
   3   5  -5 82563.2 1105.00   3
  -3  -5   5 84497.2 1068.69   7
   3  -5  -5 82226.8 1041.64   3
  -3  -5   5 83647.0 1113.36   4
  -3  -5   5 83299.3 1098.73   5
  -3   5   5 79598.6 1020.66   2
   3   5  -5 80988.3 1063.04   7
  -3  -5   5 80674.3 1097.33   3
  -3   5   4 1503.09 56.3400   2
  -3  -5   4 1401.18 84.9231   3
   3   5  -4 1532.65 90.5783   3
   3  -5  -4 1559.76 77.6431   7
   3   5  -4 1494.24 85.2601   5
   3  -5  -4 1549.48 65.8515   3
  -3  -5   4 1583.78 90.5005   4
   3   5  -4 1589.54 78.8471   1
   3   5  -4 1484.97 75.9956   7
  -3   5   4 1628.13 80.5541   1
  -3  -5   4 1520.64 84.9542   5
  -3  -5   4 1582.74 80.4065   7
   3   5  -3 63639.1 880.524   3
   3   5  -3 65587.8 853.609   1
   3   5  -3 65399.7 873.617   5
  -3  -5   3 63718.8 873.095   5
   3  -5  -3 65275.8 793.595   3
  -3  -5   3 64053.1 878.856   4
   3   5  -3 64125.9 884.524   4
  -3   5   3 63215.4 761.480   2
  -3  -5   3 63478.4 852.008   1
   3   5  -3 62559.7 848.159   7
  -3  -5   3 62337.5 878.800   3
   3  -5  -3 66149.0 845.592   7
  -3  -5   3 65491.7 852.297   7
   3   5  -2 511.587 52.7656   1
  -3  -5   2 448.262 50.9082   3
  -3  -5   2 542.743 52.5147   5
  -3  -5   2 460.088 52.6774   2
   3   5  -2 568.302 56.7662   5
   3  -5  -2 433.078 27.9261   3
  -3   5   2 428.985 21.6079   5
  -3  -5   2 436.489 53.9843   4
   3   5  -2 462.756 49.4754   4
   3  -5  -2 457.426 47.3808   7
  -3   5   2 451.483 43.0147   7
  -3  -5   2 440.195 48.3004   7
   3   5  -2 534.480 60.0245   3
  -3  -5   2 524.857 50.6289   1
  -3  -5   1 76038.5 971.755   7
   3   5  -1 76988.0 987.062   5
   3   5  -1 76005.1 983.514   1
  -3   5   1 75965.6 967.554   7
  -3  -5   1 77567.6 986.247   2
   3  -5  -1 71853.2 863.978   3
  -3  -5   1 74803.1 995.115   3
   3  -5  -1 75632.7 963.888   7
  -3  -5   1 72640.4 985.068   5
   3   5  -1 76243.7 982.745   4
  -3  -5   1 73905.2 980.734   1
   3   5   0 182.980 42.3180   5
  -3  -5   0 163.570 37.1522   5
  -3  -5   0 186.430 40.8239   7
   3   5   0 222.803 39.2301   4
  -3  -5   0 178.293 41.3390   3
  -3  -5   0 140.162 38.5265   1
   3  -5   0 136.934 37.3382   7
  -3   5   0 176.000 30.6146   7
  -3  -5   0 174.974 39.6996   2
  -3  -5  -1 11302.6 252.854   1
  -3  -5  -1 11740.0 253.749   2
  -3   5  -1 11237.8 241.659   7
   3  -5   1 11022.7 164.530   2
   3   5   1 11363.8 236.866   4
   3   5   1 11970.1 256.315   5
  -3  -5  -1 11316.3 255.235   5
   3   5   2 12816.6 252.466   4
  -3   5  -2 12771.7 266.559   7
   3  -5   2 12868.3 189.849   5
   3   5   2 12868.7 276.783   5
  -3  -5  -2 13260.3 276.519   2
  -3   5  -2 12893.0 257.570   4
   3   5   2 12983.7 273.192   2
  -3  -5  -2 12989.0 278.554   1
   3  -5   2 13133.7 202.708   2
  -3   5  -2 12725.2 181.201   3
  -3  -5  -2 13029.7 278.937   5
  -3   5  -3 6583.45 121.244   3
   3   5   3 6611.61 191.799   5
   3  -5   3 6364.64 129.272   5
   3   5   3 6367.83 184.118   2
  -3   5  -3 6425.18 114.847   6
  -3   5  -3 6545.37 171.435   4
   3  -5   3 6704.98 142.011   2
  -3   5  -3 6339.55 180.502   7
  -3  -5  -3 6328.49 188.769   2
  -3   5  -4 20115.3 301.301   3
  -3  -5  -4 19877.7 386.188   2
  -3   5  -4 20282.7 358.267   4
   3  -5   4 20077.9 329.442   2
   3   5   4 19828.7 386.357   5
  -3   5  -5 23268.4 360.182   3
  -3   5  -5 23620.8 408.606   4
   3  -5   5 23829.9 390.147   2
   3   5   5 23826.0 444.965   5
  -3  -5  -5 23185.5 438.331   2
  -3  -5  -6 19261.8 402.842   2
   3  -5   6 19827.3 362.974   4
   3  -5   6 20033.2 360.704   2
  -3   5  -6 19215.8 333.182   3
   3   5   6 19624.5 405.659   5
   3  -5   7 26855.7 466.708   2
  -3  -5  -7 26890.1 510.267   2
  -3   5  -7 26836.8 441.497   3
   3  -5   7 26799.6 455.365   4
   3   5   7 25751.6 503.793   5
  -3   5  -8 6498.77 190.158   3
  -3  -5  -8 6841.16 234.659   2
   3  -5   8 6982.08 200.592   4
  -3   5  -9 18843.0 383.978   3
  -3  -5  -9 19779.0 445.547   2
   3  -5   9 19572.9 386.695   4
  -3   5 -10 3374.50 151.103   3
  -3  -5 -10 3330.38 177.743   2
   3  -5  10 3127.23 140.150   4
  -3   5 -11 2191.69 129.958   3
   3  -5  11 2478.74 129.580   4
  -3  -5 -11 2476.91 157.406   2
   3  -5  12 1087.59 91.4378   4
  -3   5 -12 1041.23 97.8120   3
  -3  -5 -12 1071.79 114.503   2
   3  -5  13 1215.64 99.6666   4
  -3   5 -13 1245.31 109.838   3
  -3  -5 -13 1188.65 123.826   2
  -3   5 -14 977.794 105.088   3
   3  -5  14 736.770 82.2197   4
  -3  -5 -14 920.161 117.163   2
  -3   5 -15 7564.79 290.015   3
  -3  -5 -15 7822.55 321.336   3
   3  -5  15 7918.23 271.778   4
  -3  -5 -15 7646.06 320.992   2
   3  -5  16 3635.93 187.552   4
  -3  -5 -16 4178.40 234.752   3
  -3   5 -16 3856.16 214.739   3
  -3   5 -17 16660.6 480.082   3
   3  -5  17 17231.2 446.187   4
  -3  -5 -17 16536.8 501.299   3
   3  -5  18 6041.76 258.805   4
  -3   5 -18 5892.16 286.050   3
  -3  -5 -18 5875.14 295.443   3
   3  -5  19 12740.6 397.488   4
  -3  -5 -19 13159.1 467.353   3
  -3   5 -19 12432.1 434.556   3
  -3   5 -20 2634.03 203.212   3
  -3  -5 -20 2296.96 205.067   3
   3  -5  20 2569.93 181.038   4
  -3  -5 -21 4350.39 280.446   3
  -3   5 -21 4106.77 261.620   3
  -3   5 -22 292.202 104.904   3
  -3   5 -23 337.102 108.086   3
   3  -6 -23 9380.77 415.489   3
  -3  -6  23 10807.7 450.076   4
   3   6 -23 9275.19 423.498   3
  -3  -6  22 7289.43 364.215   4
   3  -6 -22 7141.07 350.253   3
   3   6 -22 6767.25 352.738   3
   3   6 -21 11055.7 438.547   3
   3  -6 -21 10797.4 421.793   3
  -3  -6  21 11620.8 450.934   4
   3  -6 -20 10800.1 406.172   3
   3   6 -20 10364.2 411.982   3
  -3  -6  20 10701.2 423.145   4
   3  -6 -19 6322.48 299.450   3
  -3  -6  19 6597.76 321.001   4
   3   6 -19 6260.99 306.178   3
   3   6 -18 8655.46 348.615   3
   3  -6 -18 8577.09 334.281   3
  -3  -6  18 8834.71 362.217   4
   3   6 -17 4350.81 235.319   3
  -3  -6  17 4105.72 239.008   4
   3  -6 -17 4666.73 235.415   3
   3   6 -16 1288.39 131.780   3
  -3  -6  16 1248.29 133.966   4
   3  -6 -16 1290.97 126.074   3
   3   6 -15 932.008 112.775   3
   3  -6 -15 1011.30 111.266   3
  -3  -6  15 996.286 117.748   4
   3  -6 -14 218.998 58.4825   3
   3   6 -14 152.457 60.5571   3
  -3  -6  14 220.684 67.3143   4
   3   6 -13 15187.9 395.304   6
   3   6 -13 14996.5 398.527   3
   3  -6 -13 15251.4 388.689   3
  -3  -6  13 15389.8 423.631   4
   3   6 -12 4417.36 200.405   3
   3  -6 -12 4171.51 184.468   3
  -3  -6  12 4457.13 213.428   4
   3   6 -12 4491.59 196.225   6
   3   6 -11 25429.1 519.992   3
  -3  -6  11 25578.8 543.766   4
   3   6 -11 25402.5 514.495   6
   3  -6 -11 26071.0 504.014   3
   3   6 -11 25418.0 427.362   1
   3  -6 -10 3170.69 146.408   3
   3   6 -10 3404.27 161.412   6
  -3  -6  10 3077.10 165.853   4
   3   6 -10 3302.92 122.833   1
   3   6 -10 3224.33 158.208   3
   3   6  -9 37952.8 569.172   1
  -3   6   9 37846.4 590.357   1
   3   6  -9 38218.6 647.044   6
   3  -6  -9 38478.9 618.990   3
  -3  -6   9 37763.2 671.344   4
   3   6  -9 38089.3 650.044   3
  -3   6   9 36755.9 613.532   2
   3   6  -8 11583.6 290.955   6
  -3   6   8 10862.2 256.725   2
   3   6  -8 11151.8 242.019   1
   3   6  -8 11456.4 293.407   3
   3  -6  -8 11082.8 262.739   3
  -3   6   8 10868.3 252.009   1
  -3  -6   8 11011.7 300.007   4
  -3   6   7 7214.78 195.299   1
   3   6  -7 7315.56 187.063   1
  -3   6   7 7625.44 191.335   2
  -3  -6   7 7460.77 233.400   4
   3   6  -7 7826.94 228.400   3
   3  -6  -7 7139.50 199.694   3
  -3   6   6 16238.8 293.212   2
  -3  -6   6 16877.3 362.618   4
   3   6  -6 16861.8 314.197   1
   3   6  -6 16637.7 351.194   3
   3  -6  -6 16656.9 309.746   3
   3   6  -6 16727.0 344.375   5
   3  -6  -6 16818.6 324.829   7
  -3   6   6 16491.2 321.619   1
   3   6  -5 5151.03 155.141   1
  -3   6   5 5331.33 127.960   2
   3  -6  -5 4659.66 141.841   3
   3   6  -5 5064.11 167.579   5
  -3  -6   5 5197.43 179.296   4
  -3   6   5 5100.02 157.967   1
   3   6  -5 5297.63 175.137   3
   3  -6  -5 5070.56 156.488   7
  -3  -6   5 5120.05 159.445   7
  -3   6   4 333.351 28.0804   2
  -3  -6   4 348.209 48.4785   7
  -3   6   4 275.529 44.1338   1
   3   6  -4 337.574 56.4011   5
   3   6  -4 327.035 42.6471   7
   3   6  -4 327.934 45.0893   1
   3  -6  -4 387.223 49.3272   7
   3   6  -4 304.670 47.8672   3
  -3  -6   4 440.239 67.2588   4
  -3  -6   4 231.358 42.4367   3
  -3  -6   3 3478.92 133.900   3
  -3   6   3 3437.63 83.7720   5
   3   6  -3 3482.81 126.563   7
   3   6  -3 3190.90 132.692   3
   3   6  -3 3400.94 130.826   5
  -3  -6   3 3352.90 138.393   4
  -3  -6   3 3350.19 129.120   5
   3  -6  -3 3349.87 122.088   7
   3   6  -3 3536.87 129.364   1
  -3  -6   3 3566.06 127.198   7
  -3   6   3 3245.77 71.0774   2
   3   6  -2 175.841 40.6843   5
   3   6  -2 187.766 37.6743   4
  -3  -6   2 200.215 42.4905   3
  -3  -6   2 193.164 41.9060   5
  -3   6   2 182.694 17.5595   5
  -3  -6   2 265.796 46.4457   2
  -3  -6   2 170.121 38.1022   1
   3   6  -2 246.255 47.4928   1
  -3   6   2 212.847 36.7615   7
  -3  -6   2 134.234 38.1502   7
   3  -6  -2 214.946 40.9232   7
  -3  -6   1 48215.1 689.861   2
  -3  -6   1 48142.4 686.738   7
   3   6  -1 46955.2 688.681   5
  -3  -6   1 47032.9 692.714   1
   3   6  -1 48274.9 697.476   1
   3   6  -1 47763.2 694.041   4
  -3  -6   1 45954.5 692.491   5
   3  -6  -1 46916.9 575.787   3
  -3  -6   1 48170.0 703.531   3
  -3   6   1 46377.6 675.791   7
   3  -6  -1 46040.1 674.311   7
   3   6   0 11675.9 256.268   5
  -3  -6   0 10847.3 253.816   1
  -3  -6   0 11400.4 262.603   3
   3  -6   0 10932.0 243.915   7
   3  -6   0 10452.4 155.200   3
  -3  -6   0 10688.7 245.429   7
  -3  -6   0 11072.5 254.384   5
   3   6   0 11396.7 249.721   4
  -3   6   0 11217.3 245.665   7
  -3  -6   0 11369.2 251.917   2
   3   6   1 82019.0 1043.34   5
  -3   6  -1 79075.6 1029.01   4
  -3  -6  -1 80115.8 1047.79   5
  -3  -6  -1 79834.9 1055.68   3
   3   6   1 81735.8 1028.06   4
   3   6   1 79888.9 1031.88   2
   3  -6   1 74459.8 894.735   2
   3  -6   1 74150.9 889.929   3
  -3   6  -1 80208.9 1032.40   7
  -3  -6  -1 79130.0 1039.12   2
   3  -6   1 74452.1 889.380   5
   3   6   2 14767.1 311.085   5
   3  -6   2 14514.4 206.648   3
   3   6   2 14542.7 293.912   4
   3  -6   2 14760.7 213.070   5
   3   6   2 14604.6 303.789   2
   3  -6   2 14590.3 224.142   2
  -3  -6  -2 14788.0 308.278   2
  -3   6  -2 14361.1 297.751   4
  -3  -6  -3 16177.0 335.675   2
   3  -6   3 15536.3 244.087   5
   3  -6   3 16115.5 259.238   2
   3   6   3 15958.9 335.697   5
  -3   6  -3 15574.1 316.232   4
   3  -6   3 15629.4 235.825   3
  -3   6  -3 16293.7 239.075   3
   3  -6   4 96.6917 26.8516   2
  -3   6  -4 57.7232 21.0199   3
   3   6   4 134.620 51.0870   5
  -3  -6  -4 28.8094 38.5113   2
  -3   6  -4 41.7292 31.9835   4
   3  -6   4 48.3306 20.3507   5
  -3   6  -4 78.9764 20.0174   6
   3  -6   4 52.1101 18.7322   3
   3   6   5 12912.9 311.759   5
   3  -6   5 12703.9 243.121   5
  -3   6  -5 13021.2 235.269   3
   3  -6   5 13074.5 259.855   2
  -3  -6  -5 13295.7 313.794   2
  -3   6  -5 13191.2 220.270   6
  -3   6  -6 3599.54 117.370   3
   3  -6   6 3970.55 136.505   2
   3   6   6 3841.68 169.400   5
  -3  -6  -6 3597.50 159.331   2
  -3  -6  -7 866.683 89.0012   2
   3   6   7 1049.49 100.298   5
   3  -6   7 1294.83 93.2909   4
   3  -6   7 1051.52 76.1085   2
  -3   6  -7 1073.90 69.8216   3
  -3   6  -8 6551.68 189.756   3
   3   6   8 6554.42 238.167   5
   3  -6   8 6586.28 206.910   4
  -3  -6  -8 6466.42 233.289   2
  -3   6  -9 10345.9 262.539   3
   3  -6   9 10666.3 277.059   4
  -3  -6  -9 10931.3 319.489   2
   3  -6  10 7477.57 235.192   4
  -3  -6 -10 7728.73 275.339   2
  -3   6 -10 7772.25 234.956   3
   3  -6  11 38117.9 662.764   4
  -3  -6 -11 38610.1 738.585   2
  -3   6 -11 39240.5 672.616   3
   3  -6  12 25822.7 516.179   4
  -3   6 -12 25342.5 524.247   3
  -3  -6 -12 26198.4 585.733   2
  -3   6 -13 19942.3 471.205   3
   3  -6  13 21106.9 462.474   4
  -3  -6 -13 20595.5 524.521   2
   3  -6  14 20492.0 463.255   4
  -3  -6 -14 19747.0 526.358   2
  -3   6 -14 19106.9 475.563   3
  -3  -6 -15 16467.6 489.293   2
   3  -6  15 16376.0 418.597   4
  -3   6 -15 16123.6 442.754   3
  -3  -6 -16 5866.50 283.156   3
  -3   6 -16 5559.96 257.799   3
   3  -6  16 5608.70 239.553   4
  -3  -6 -16 5546.64 282.834   2
  -3   6 -17 1443.45 145.123   3
  -3  -6 -17 1284.91 148.873   3
   3  -6  17 1376.35 126.425   4
  -3   6 -18 416.720 96.5214   3
  -3  -6 -18 407.249 102.083   3
   3  -6  18 435.075 80.5964   4
   3  -6  19 3.07192 49.9869   4
  -3   6 -19-12.2389 77.4750   3
   3  -6  20 73.3071 62.6127   4
  -3   6 -20 100.657 68.7550   3
  -3  -6 -20 282.253 98.7626   3
  -3  -6 -21 4211.93 283.677   3
  -3   6 -21 3782.43 256.980   3
  -3   6 -22 273.892 90.5042   3
   3   7 -23-29.3817 81.1539   3
   3  -7 -23 9.04043 70.4900   3
  -3  -7  23 14.4171 75.9963   4
   3  -7 -22 57.3970 73.5761   3
   3   7 -22 187.696 85.7367   3
  -3  -7  22 188.251 85.1908   4
   3   7 -21 161.717 86.4848   3
   3  -7 -21 80.0589 80.0124   3
  -3  -7  21 30.8108 81.1225   4
   3   7 -20 673.549 121.915   3
   3  -7 -20 669.930 118.576   3
  -3  -7  20 710.593 122.274   4
   3  -7 -19 78.4090 69.4775   3
  -3  -7  19-58.4926 67.8756   4
   3   7 -19 2.31269 66.5419   3
   3   7 -18 4363.77 248.811   3
  -3  -7  18 4816.86 268.468   4
   3  -7 -18 4539.01 244.449   3
   3   7 -17 190.407 64.6832   3
   3  -7 -17 254.501 77.4802   3
  -3  -7  17 191.025 83.6204   4
   3   7 -16 19028.1 512.301   3
   3  -7 -16 20570.3 512.890   3
  -3  -7  16 18598.0 527.845   4
   3   7 -15 194.057 73.7116   3
  -3  -7  15 193.791 69.8602   4
   3  -7 -15 282.272 76.0125   3
   3   7 -14 10009.7 322.187   6
   3  -7 -14 9161.88 306.571   3
  -3  -7  14 9308.49 337.494   4
   3   7 -14 8783.12 312.479   3
   3   7 -14 9434.87 241.905   1
  -3  -7  13 272.734 68.4389   4
   3   7 -13 242.195 70.8032   6
   3   7 -13 246.092 64.3081   3
   3  -7 -13 327.048 68.0164   3
   3   7 -13 232.677 44.9282   1
   3   7 -12 141.053 58.2268   3
   3   7 -12 94.7713 36.9165   1
  -3  -7  12 188.155 68.3202   4
   3  -7 -12 177.929 53.9145   3
   3   7 -12 97.7890 53.6181   6
   3   7 -11 152.000 56.9104   6
   3  -7 -11 123.964 47.7399   3
  -3  -7  11 260.359 71.3256   4
   3   7 -11 109.384 36.7924   1
   3   7 -11 113.044 56.0143   3
   3   7 -10 2286.90 133.900   6
   3  -7 -10 2136.14 122.112   3
   3   7 -10 2156.31 107.034   1
  -3  -7  10 2036.69 138.536   4
   3   7 -10 2205.67 134.877   3
   3   7  -9 86.2831 52.8026   6
  -3   7   9 61.2188 39.9698   1
   3   7  -9-12.9353 31.0390   1
   3  -7  -9 40.5017 37.6976   3
  -3  -7   9 26.4375 53.2489   4
  -3   7   9 76.3516 38.1600   2
   3   7  -9 65.4839 49.5477   3
  -3   7   8 29466.3 497.424   2
   3   7  -8 30396.5 500.048   1
   3  -7  -8 29186.1 510.589   3
  -3  -7   8 29893.2 572.641   4
  -3   7   8 29772.6 513.461   1
   3   7  -8 31207.1 558.497   3
   3   7  -7 901.501 71.1569   1
   3   7  -7 845.798 81.1864   3
  -3  -7   7 849.059 90.8271   4
  -3   7   7 819.680 61.0264   2
  -3   7   7 908.764 78.1536   1
   3  -7  -7 877.180 76.1409   7
   3  -7  -7 984.236 73.2216   3
  -3   7   6 63616.9 852.660   2
  -3   7   6 66810.1 923.196   1
   3  -7  -6 64618.9 918.279   7
   3   7  -6 65596.2 937.787   5
  -3  -7   6 64658.1 965.923   4
   3   7  -6 65733.3 908.785   1
   3   7  -6 65308.2 948.537   3
  -3  -7   5 3951.65 149.415   7
  -3   7   5 4253.36 123.509   5
   3   7  -5 3752.57 150.057   5
  -3   7   5 4034.24 110.203   2
   3   7  -5 3972.40 145.147   1
  -3  -7   5 4091.68 168.131   4
   3  -7  -5 4033.19 149.145   7
   3   7  -5 3829.78 156.549   3
  -3   7   5 4243.67 153.991   1
  -3  -7   4 77294.6 1068.47   7
  -3   7   4 77809.8 953.023   2
   3  -7  -4 79714.7 1065.25   7
   3   7  -4 78115.7 1072.59   5
  -3   7   4 78398.7 1071.48   1
  -3   7   4 80230.8 979.062   5
   3   7  -4 78423.1 1062.70   1
   3   7  -4 80413.2 1092.68   3
  -3  -7   4 77340.1 1102.12   4
  -3   7   3 253.407 28.8687   5
  -3   7   3 310.002 53.9523   1
   3   7  -3 54.8441 44.4401   5
   3   7  -3 16.3887 36.8000   1
   3  -7  -3 314.167 49.3807   7
  -3  -7   3 3.25019 39.6832   4
  -3  -7   3 34.7081 36.7886   7
  -3  -7   2 100071. 1298.98   7
   3   7  -2 96906.5 1294.01   5
  -3   7   2 98591.4 1162.82   5
   3  -7  -2 100322. 1293.94   7
  -3  -7   2 100365. 1298.54   2
   3   7  -2 100160. 1307.59   1
   3   7  -1 268.168 50.6245   5
  -3  -7   1 293.263 47.4616   2
   3  -7  -1 448.261 30.3342   3
  -3   7   1 350.360 22.5061   5
   3   7  -1 298.898 55.0606   1
  -3  -7   1 273.719 48.3865   7
   3  -7  -1 377.407 51.3175   7
   3  -7   0 31511.4 412.379   3
   3   7   0 32476.4 545.871   1
   3   7   0 31451.3 528.828   5
  -3  -7   0 32854.7 537.160   7
  -3  -7   0 32956.4 532.576   2
   3  -7   0 33611.9 534.908   7
   3  -7   1 4398.19 86.7893   2
  -3  -7  -1 5079.17 168.280   2
   3  -7   1 4985.83 92.4092   5
   3   7   1 5091.32 169.602   5
   3  -7   1 4676.28 94.9710   3
   3  -7   1 4681.03 91.5963   2
  -3  -7  -1 4916.71 169.466   7
   3  -7   2 40.1563 14.0281   5
   3  -7   2 61.5244 14.3623   3
  -3  -7  -2 8.71752 39.4655   2
   3   7   2 38.5981 44.2585   5
   3  -7   2 42.3798 16.1904   2
   3  -7   3 1381.70 55.0826   5
   3   7   3 1343.77 96.6216   5
  -3   7  -3 1338.05 53.7449   3
   3  -7   3 1371.76 52.8235   3
  -3  -7  -3 1328.14 92.3278   2
   3  -7   3 1309.41 59.6704   2
  -3  -7  -4 2213.41 121.637   2
   3  -7   4 2100.97 77.5843   5
  -3   7  -4 2262.18 76.6309   3
   3  -7   4 2194.99 85.7372   2
   3   7   4 2231.30 123.500   5
  -3   7  -4 2171.47 75.3964   6
   3  -7   4 2131.26 73.4104   3
   3  -7   5 334.861 37.7275   5
   3   7   5 236.131 58.2671   5
  -3   7  -5 371.891 35.9530   6
   3  -7   5 369.499 36.9796   3
  -3   7  -5 310.458 37.0514   3
  -3  -7  -5 142.296 46.9582   2
   3  -7   5 412.583 46.5574   2
  -3  -7  -6 17964.9 397.445   2
   3   7   6 17387.6 395.904   5
   3  -7   6 16769.4 315.630   5
   3  -7   6 17913.2 309.231   3
   3  -7   6 17137.7 334.925   2
  -3   7  -6 17780.6 293.589   6
  -3   7  -6 17385.0 308.503   3
   3   7   7 1871.72 124.805   5
  -3  -7  -7 1783.00 123.166   2
   3  -7   7 2026.12 99.9204   5
   3  -7   7 2215.25 109.590   2
  -3   7  -7 1995.08 94.5042   3
   3   7   8 17270.4 417.783   5
  -3  -7  -8 17370.1 414.258   2
   3  -7   8 17007.2 379.029   4
  -3   7  -8 17637.6 343.372   3
  -3  -7  -9 86.7111 56.3493   2
  -3   7  -9 105.266 43.1183   3
   3  -7   9 215.908 64.5743   4
   3   7   9 178.711 70.1454   5
   3  -7  10 2571.32 141.995   4
  -3   7 -10 2369.55 127.134   3
   3   7  10 2467.23 163.547   5
  -3  -7 -10 2804.26 167.739   2
   3   7  11 32.1863 63.0271   5
  -3   7 -11 52.9744 44.1886   3
  -3  -7 -11 115.883 67.2523   2
   3  -7  11 91.7401 53.1742   4
  -3   7 -12 329.051 65.1065   3
   3  -7  12 208.559 63.8766   4
  -3  -7 -12 324.596 80.1937   2
  -3   7 -13 1332.50 116.299   3
   3  -7  13 1533.75 125.122   4
  -3  -7 -13 1491.79 141.642   2
   3  -7  14 1453.08 119.936   4
  -3  -7 -14 1303.34 136.879   2
  -3   7 -14 1549.47 127.984   3
  -3   7 -15 90.5309 51.8941   3
   3  -7  15 288.223 70.2176   4
  -3  -7 -15 183.572 77.2761   2
  -3   7 -16 10599.2 368.472   3
  -3  -7 -16 11840.2 415.603   3
  -3  -7 -16 12181.6 430.087   2
   3  -7  16 11483.6 361.195   4
  -3   7 -17 761.204 112.878   3
  -3  -7 -17 746.746 116.561   3
   3  -7  17 953.872 113.583   4
   3  -7  18 16146.0 462.384   4
  -3  -7 -18 15704.8 515.063   3
  -3   7 -18 15802.3 487.984   3
  -3   7 -19 381.765 100.536   3
  -3  -7 -19 593.580 115.650   3
   3  -7  19 632.803 103.717   4
   3  -7  20 6445.23 294.295   4
  -3   7 -20 6322.98 321.029   3
  -3  -7 -20 5791.37 324.439   3
  -3   7 -21 219.078 97.3629   3
  -3   7 -22 605.919 109.978   3
   3   8 -23 8071.93 398.753   3
   3  -8 -22 10217.2 427.257   3
   3   8 -22 10680.5 448.933   3
  -3  -8  22 10425.7 448.873   4
   3   8 -21 6900.18 348.375   3
   3  -8 -21 6718.74 335.096   3
  -3  -8  21 6430.84 343.560   4
  -3  -8  20 11603.5 453.097   4
   3  -8 -20 10585.2 414.150   3
   3   8 -20 11643.1 444.592   3
   3   8 -19 7331.93 338.553   3
   3  -8 -19 7164.95 324.742   3
  -3  -8  19 7618.94 354.483   4
   3  -8 -18 9153.83 354.858   3
  -3  -8  18 8666.13 369.061   4
   3   8 -18 8631.73 357.712   3
   3  -8 -17 3937.84 223.014   3
   3   8 -17 3311.94 148.798   1
  -3  -8  17 3511.15 228.214   4
   3   8 -17 3666.18 222.066   3
   3   8 -16 653.471 100.920   3
   3   8 -16 698.364 72.6199   1
   3  -8 -16 671.914 100.310   3
  -3  -8  16 632.267 108.341   4
   3   8 -15 77.6369 41.3325   1
   3  -8 -15 118.111 60.4062   3
  -3  -8  15 81.9161 67.3613   4
   3   8 -15 144.301 66.4002   3
   3  -8 -14 5580.26 238.454   3
   3   8 -14 5731.13 254.906   3
  -3  -8  14 5958.93 271.348   4
   3   8 -14 5522.94 190.922   1
   3   8 -14 5806.69 245.089   6
   3   8 -13 2422.88 155.341   6
   3  -8 -13 2489.98 154.595   3
   3   8 -13 2385.06 122.613   1
  -3  -8  13 2465.64 171.177   4
   3   8 -13 2300.07 160.482   3
   3   8 -12 10569.6 321.241   6
  -3  -8  12 10331.2 342.116   4
   3  -8 -12 10248.0 306.188   3
   3   8 -12 10015.5 262.941   1
   3   8 -12 9911.22 318.943   3
   3   8 -11 5524.85 225.730   3
   3   8 -11 5128.87 214.482   6
   3   8 -11 5376.08 184.991   1
  -3  -8  11 5501.96 239.626   4
   3  -8 -11 5852.50 215.989   3
   3   8 -10 15320.4 380.486   6
   3   8 -10 14686.6 327.642   1
  -3  -8  10 14659.5 396.781   4
   3  -8 -10 15357.3 359.321   3
   3   8 -10 15122.3 384.181   3
   3   8  -9 12736.5 336.843   3
   3   8  -9 12798.6 297.130   1
   3  -8  -9 12599.3 308.485   3
  -3   8   9 12228.6 307.793   1
  -3  -8   9 12713.8 354.844   4
   3   8  -9 12188.9 328.667   6
   3  -8  -8 14939.0 350.025   7
   3  -8  -8 15622.7 337.717   3
  -3   8   8 15041.2 315.313   2
  -3   8   8 15812.9 350.992   1
   3   8  -8 15719.5 337.031   1
   3   8  -8 15494.1 371.044   3
  -3  -8   8 15916.6 392.998   4
   3  -8  -7 3915.20 160.948   7
  -3   8   7 3776.42 129.171   2
  -3   8   7 4010.45 161.963   1
  -3  -8   7 4175.98 186.997   4
   3   8  -7 3817.10 165.857   5
   3   8  -7 3890.05 169.301   3
   3   8  -7 3926.80 153.809   1
  -3   8   6 11742.2 248.995   5
  -3  -8   6 11274.6 312.773   4
   3   8  -6 11322.9 288.527   5
  -3   8   6 11257.4 228.592   2
   3   8  -6 11774.4 281.228   1
   3   8  -6 11417.5 298.478   3
  -3   8   6 11582.2 288.642   1
   3  -8  -6 11783.7 288.514   7
  -3   8   5 177.251 27.7725   2
  -3   8   5 133.917 45.3647   1
   3   8  -5 145.295 48.6720   1
   3   8  -5 163.036 49.3549   5
   3  -8  -5 145.939 44.8939   7
  -3   8   5 145.589 31.8112   5
  -3  -8   5 164.021 51.9873   4
   3   8  -5 193.902 52.0783   3
  -3  -8   5 231.586 55.4771   7
   3  -8  -4 69.9107 35.4727   7
  -3   8   4 78.2306 19.3377   2
  -3   8   4 71.3485 23.3073   5
   3   8  -4 85.8372 51.0849   1
  -3  -8   4 4.62106 46.4757   4
   3  -8  -4 70.8416 19.5312   2
   3   8  -4 99.3464 41.0219   3
   3   8  -4 84.8243 40.8681   5
  -3   8   4 66.3067 43.4648   1
  -3  -8   4 95.9775 42.5427   7
  -3   8   3 1623.84 61.9099   5
  -3  -8   3 1715.51 100.192   2
   3   8  -3 1554.89 98.1245   5
  -3   8   3 1562.30 99.4188   1
   3  -8  -3 1575.81 98.9823   7
   3   8  -3 1582.11 99.2286   1
  -3  -8   3 1592.27 101.485   7
   3  -8  -3 1572.01 53.4286   2
  -3  -8   2 6258.39 192.196   2
   3   8  -2 6287.83 197.128   5
  -3   8   2 6335.88 122.417   5
  -3  -8   2 6141.83 197.738   7
   3  -8  -2 5980.96 192.680   7
   3  -8  -2 5893.79 104.144   2
   3   8  -2 6108.77 200.099   1
   3  -8  -2 6129.93 138.461   3
  -3  -8   1 2241.48 118.415   7
   3   8  -1 1953.91 108.994   5
  -3   8   1 1961.65 57.9118   5
   3   8  -1 2181.78 119.998   1
  -3  -8   1 2279.17 114.779   2
   3  -8  -1 2118.39 114.795   7
   3  -8  -1 2054.07 69.9361   3
   3  -8   0 24960.4 446.698   7
  -3  -8   0 24720.3 450.041   7
   3   8   0 25220.7 443.396   5
   3   8   0 24875.3 459.988   1
  -3  -8   0 24863.3 441.850   2
   3  -8   0 24903.3 325.800   3
  -3  -8  -1 16227.2 352.885   7
   3  -8   1 15965.0 343.375   7
  -3  -8  -1 15704.7 337.776   2
   3  -8   1 14914.7 227.541   5
   3   8   1 15770.5 338.375   5
   3  -8   1 14825.4 217.457   2
   3  -8   1 15436.9 234.416   3
   3  -8   2 9338.23 165.708   5
  -3  -8  -2 9545.86 262.981   7
   3   8   2 9469.59 254.980   5
  -3  -8  -2 9450.75 255.284   2
   3  -8   2 9453.56 165.540   3
   3   8   3 459.664 61.1173   5
  -3  -8  -3 475.534 60.5458   2
   3  -8   3 508.169 39.1344   2
   3  -8   3 407.340 32.8475   3
   3  -8   3 525.272 36.5842   5
   3  -8   4 6886.93 154.960   5
   3  -8   4 6837.86 150.830   3
   3  -8   4 7428.03 169.805   2
  -3   8  -4 7083.23 154.276   3
  -3  -8  -4 6787.00 222.472   2
   3   8   4 7058.98 228.442   5
  -3  -8  -5 81.9967 50.8482   2
  -3   8  -5 22.5599 21.2631   6
   3   8   5 86.7616 52.6067   5
   3  -8   5 42.0040 22.5163   5
   3  -8   5 78.4901 23.6162   3
   3  -8   5 34.3719 24.6961   2
  -3   8  -5 92.1726 30.0691   3
   3  -8   6 105.771 34.2006   2
  -3  -8  -6 36.8779 40.5887   2
   3  -8   6 129.581 31.5225   3
  -3   8  -6 106.374 31.6847   3
   3  -8   6 101.680 27.0082   5
   3   8   6 99.2099 50.6194   5
  -3   8  -6 91.6192 29.4585   6
   3   8   7 2178.50 139.583   5
   3  -8   7 2122.73 94.1770   3
  -3  -8  -7 2173.89 136.674   2
   3  -8   7 2011.19 98.5084   5
  -3   8  -7 1912.30 85.8415   6
  -3   8  -7 1908.45 94.5593   3
   3  -8   7 1822.86 101.495   2
  -3  -8  -8 5468.60 222.665   2
  -3   8  -8 5169.15 167.607   3
   3   8   8 5760.89 230.082   5
  -3   8  -9 10887.1 270.035   3
   3   8   9 11071.2 339.065   5
  -3  -8  -9 10652.0 330.054   2
  -3   8 -10 29492.7 534.259   3
  -3  -8 -10 29119.1 616.181   2
   3  -8  10 28970.1 572.886   4
   3   8  10 30145.4 629.568   5
  -3  -8 -11 22788.9 541.481   2
   3  -8  11 22991.5 500.815   4
  -3   8 -11 23052.4 473.282   3
   3   8  11 22512.8 544.502   5
   3   8  12 19976.9 519.364   5
  -3   8 -12 19548.9 447.722   3
   3  -8  12 20077.4 468.034   4
  -3  -8 -12 19101.2 504.096   2
   3   8  13 15942.5 470.011   5
  -3   8 -13 15667.0 411.098   3
  -3  -8 -13 16670.1 474.106   2
   3  -8  13 16613.3 428.337   4
   3  -8  14 16414.9 438.182   4
  -3  -8 -14 16506.1 488.848   2
  -3   8 -14 15927.1 431.978   3
   3   8  14 17584.2 505.620   5
  -3   8 -15 4631.14 232.357   3
   3   8  15 4919.42 268.714   5
   3  -8  15 4761.65 231.369   4
  -3  -8 -15 4838.35 262.214   2
   3   8  16 2696.25 206.776   5
  -3   8 -16 3033.67 195.900   3
   3  -8  16 2897.31 187.150   4
  -3  -8 -16 2875.82 210.336   2
  -3   8 -17 1331.87 139.196   3
  -3  -8 -17 1095.85 144.926   3
  -3  -8 -17 1253.75 146.425   2
   3  -8  17 1182.46 125.678   4
   3   8  17 956.148 142.730   5
   3   8  18 169.729 90.7410   5
  -3  -8 -18 507.436 116.651   3
   3  -8  18 505.004 99.2179   4
  -3   8 -18 338.902 86.6510   3
  -3   8 -19 28.4556 78.5780   3
   3   8  19 195.091 102.811   5
  -3  -8 -19 7.18095 73.2704   3
   3  -8  19 34.7936 65.3151   4
  -3   8 -20 1322.78 161.570   3
   3  -8  20 1464.76 158.394   4
   3   8  20 1250.53 189.054   5
  -3  -8 -20 1377.42 170.298   3
   3   9 -22 1179.42 161.621   3
  -3  -9  22 1361.44 170.300   4
   3  -9 -22 1102.71 152.258   3
  -3  -9  21 143.745 76.8818   4
   3  -9 -21 246.443 91.8764   3
   3   9 -21 148.357 85.8604   3
   3  -9 -20 332.101 95.3244   3
  -3  -9  20 511.062 117.263   4
   3   9 -20 390.041 103.286   3
   3   9 -19 4054.07 260.312   3
  -3  -9  19 4471.15 278.449   4
   3  -9 -19 4404.70 263.095   3
   3  -9 -18 222.878 74.1824   3
  -3  -9  18 191.841 75.6145   4
   3   9 -18 195.066 82.4575   3
   3  -9 -17 8077.41 326.187   3
  -3  -9  17 7992.66 351.643   4
   3   9 -17 7736.51 333.135   3
   3  -9 -16 1051.33 119.254   3
  -3  -9  16 1269.33 142.552   4
   3   9 -16 1184.81 96.6769   1
   3   9 -16 1383.56 140.401   3
   3   9 -15 23513.1 578.700   3
   3  -9 -15 22739.1 549.435   3
  -3  -9  15 23048.5 598.308   4
   3   9 -15 23216.3 557.154   6
   3   9 -15 23049.8 467.679   1
   3   9 -14 853.065 81.9613   1
  -3  -9  14 866.914 109.038   4
   3  -9 -14 831.189 103.109   3
   3   9 -14 984.350 113.218   6
   3   9 -14 813.486 102.785   3
   3   9 -13 13769.9 335.130   1
  -3  -9  13 13866.1 423.058   4
   3   9 -13 13311.0 396.088   3
   3  -9 -13 13604.9 380.514   3
   3   9 -13 13699.5 389.044   6
   3   9 -12 1864.32 140.615   3
   3  -9 -12 1900.65 131.116   3
   3   9 -12 1886.54 135.384   6
  -3  -9  12 1882.28 151.977   4
   3   9 -12 1858.94 115.618   1
   3   9 -11 924.868 99.9682   6
   3   9 -11 988.582 85.0029   1
   3   9 -11 1089.03 108.212   3
  -3  -9  11 1023.31 113.350   4
   3  -9 -11 865.725 87.4452   3
   3   9 -10 28.1750 49.0634   6
   3  -9 -10 8.53004 49.5270   7
   3  -9 -10 64.7678 48.1321   3
   3   9 -10 31.3611 36.2364   1
  -3  -9  10 42.2236 54.0136   4
   3   9 -10 2.68170 43.2574   3
   3   9  -9 15672.8 388.050   6
   3  -9  -9 15916.0 363.298   3
  -3  -9   9 15329.3 410.224   4
  -3   9   9 15735.1 373.934   1
   3   9  -9 15776.9 390.127   3
   3  -9  -9 15419.0 375.131   7
   3   9  -9 15141.3 352.046   1
  -3   9   8 283.859 58.0741   5
  -3   9   8 265.510 60.5460   1
   3   9  -8 284.061 54.7668   1
  -3  -9   8 272.612 75.4282   4
   3   9  -8 281.180 62.0235   3
   3  -9  -8 365.412 66.4526   7
  -3   9   8 252.790 42.9341   2
   3   9  -7 26596.2 521.267   3
   3   9  -7 26229.4 493.284   1
  -3   9   7 25252.6 447.984   5
   3   9  -7 26518.3 509.423   5
  -3  -9   7 25245.5 540.428   4
  -3   9   7 24944.6 423.188   2
  -3   9   7 25752.4 502.917   1
   3  -9  -7 26944.4 512.059   7
  -3   9   6 52.0083 24.3766   2
  -3  -9   6 110.876 55.7225   4
  -3   9   6 85.1353 31.0228   5
   3  -9  -6 83.0468 46.7384   7
   3   9  -6 129.473 48.6709   5
  -3   9   6 46.8262 42.1755   1
   3   9  -6 52.1550 45.4173   1
   3   9  -6 40.4055 47.4851   3
   3  -9  -5 50312.8 799.653   7
  -3   9   5 49962.2 674.453   2
  -3  -9   5 52488.4 848.752   4
  -3   9   5 52024.2 710.063   5
   3   9  -5 51908.8 800.835   5
   3   9  -5 51525.6 801.218   1
  -3   9   5 51465.7 810.706   1
   3  -9  -5 52700.3 688.899   2
   3   9  -5 50490.4 811.848   3
  -3  -9   5 49970.0 804.684   7
  -3  -9   4 1095.61 85.7833   2
   3   9  -4 1223.20 92.7230   5
  -3  -9   4 1182.34 96.9921   7
   3  -9  -4 1118.08 92.4281   7
   3   9  -4 1252.93 97.3773   1
  -3   9   4 1350.95 65.6444   5
  -3   9   4 1401.23 102.775   1
   3  -9  -4 1271.27 56.9581   2
   3  -9  -3 67211.0 1003.99   7
  -3   9   3 70175.7 872.357   5
   3   9  -3 71242.3 1004.80   5
  -3  -9   3 69325.3 995.566   2
   3  -9  -3 69173.9 848.172   2
  -3   9   3 69823.8 1021.40   1
   3   9  -3 68773.1 1016.41   1
  -3  -9   3 69560.4 1015.78   7
   3  -9  -2 213.768 52.6023   7
   3   9  -2 237.980 54.6510   1
  -3   9   2 217.470 26.5128   5
  -3  -9   2 261.656 55.1550   7
   3   9  -2 229.683 52.3144   5
   3  -9  -2 221.249 31.6849   3
  -3  -9   2 213.453 50.4484   2
   3  -9  -2 212.195 19.6262   2
  -3   9   2 201.319 55.5017   1
   3   9  -1 36964.4 630.855   1
   3   9  -1 36449.9 602.623   5
  -3  -9   1 36429.4 621.334   7
   3  -9  -1 34960.5 490.805   3
   3  -9  -1 34307.7 440.393   2
  -3  -9   1 36372.7 601.206   2
   3  -9  -1 36110.0 612.160   7
  -3   9   1 36103.6 467.429   5
   3  -9   0 248.667 27.8845   3
   3  -9   0 143.107 16.0255   2
   3   9   0 119.799 43.7792   5
   3   9   0 119.478 55.7831   1
  -3  -9   0 181.388 51.6173   2
  -3  -9   0 292.841 62.1174   7
   3  -9   0 135.105 50.1628   7
   3  -9   1 1040.76 92.1177   7
  -3  -9  -1 1118.08 89.8452   2
   3  -9   1 1022.74 48.9292   3
   3   9   1 932.980 86.5422   5
   3  -9   1 924.415 39.4670   2
  -3  -9  -1 1045.88 92.9081   7
   3  -9   2 20.8688 14.6832   5
   3  -9   2 2.88479 14.1456   2
   3   9   2 33.9127 44.8577   5
  -3  -9  -2-7.64629 43.8767   2
  -3  -9  -2 29.7966 48.5945   7
   3  -9   2 41.5437 16.9811   3
  -3  -9  -3 2095.54 123.533   2
   3   9   3 2072.66 124.560   5
   3  -9   3 1815.60 76.6242   3
   3  -9   3 2339.74 81.9653   5
  -3  -9  -3 2026.23 127.567   7
   3  -9   4 1439.25 67.5330   5
   3  -9   4 1570.48 68.5758   3
   3  -9   4 1552.14 75.1498   2
   3   9   4 1581.31 111.566   5
  -3  -9  -4 1438.03 109.585   2
   3  -9   5 14401.8 284.152   2
   3   9   5 13949.0 356.315   5
   3  -9   5 13560.6 262.767   5
  -3  -9  -5 14293.6 357.596   2
   3  -9   5 14180.8 259.581   3
  -3   9  -5 14952.7 267.420   3
  -3   9  -5 13869.8 266.335   6
  -3   9  -6 39.1525 31.0148   3
  -3  -9  -6 29.7154 43.4819   2
  -3   9  -6 19.6563 25.2371   6
   3  -9   6 42.8196 22.7266   3
   3   9   6 30.0078 50.7991   5
   3  -9   6 18.2694 26.0407   2
   3  -9   6 5.10525 24.0410   5
  -3   9  -7 24447.9 400.350   6
   3  -9   7 23217.0 416.992   5
   3  -9   7 24046.0 409.271   3
  -3  -9  -7 23622.1 512.133   2
   3  -9   7 23542.6 440.354   2
   3   9   7 24156.7 516.959   5
  -3   9  -7 23876.6 412.469   3
   3   9   8 1128.79 113.366   5
  -3  -9  -8 1306.66 115.149   2
   3  -9   8 1096.54 78.3267   3
  -3   9  -8 1143.72 80.0406   3
   3   9   9 18913.7 473.709   5
  -3   9  -9 19553.9 389.992   3
  -3  -9  -9 19709.0 480.814   2
  -3   9 -10 224.307 71.7451   3
   3   9  10 121.406 61.6218   5
  -3  -9 -10 237.368 71.1018   2
  -3   9 -11 3944.05 171.787   3
   3   9  11 3673.50 208.317   5
  -3  -9 -11 3509.42 200.317   2
   3   9  12 21.9670 68.6724   5
  -3  -9 -12-13.6024 55.3192   2
   3  -9  12-101.082 66.7645   4
  -3   9 -12-31.5321 50.1067   3
  -3  -9 -13 404.348 87.4263   2
   3  -9  13 477.424 84.5678   4
  -3   9 -13 476.566 79.9944   3
   3   9  13 321.610 93.6374   5
   3   9  14 263.979 84.6057   5
  -3   9 -14 247.166 65.3882   3
   3  -9  14 145.165 59.4039   4
  -3  -9 -14 90.6299 68.1808   2
  -3   9 -15 2421.96 167.259   3
   3   9  15 2943.41 217.338   5
  -3  -9 -15 2681.27 203.704   2
   3  -9  15 2375.45 168.716   4
   3   9  16 1167.24 153.818   5
   3  -9  16 1281.50 134.450   4
  -3   9 -16 1556.52 147.122   3
  -3  -9 -16 1378.67 154.348   2
  -3  -9 -17 14505.9 500.949   2
  -3   9 -17 13429.4 438.657   3
   3  -9  17 14321.3 446.056   4
  -3  -9 -17 13667.3 482.469   3
   3   9  17 13456.3 512.460   5
   3   9  18 1484.71 188.787   5
  -3  -9 -18 1978.81 190.975   3
   3  -9  18 2050.53 176.910   4
  -3  -9 -19 12327.0 475.666   3
   3   9  19 11015.6 487.854   5
   3  -9  19 12065.4 427.425   4
   3  10 -22 5561.46 332.897   3
   3  10 -21 3619.43 265.955   3
  -3 -10  21 3512.23 263.830   4
   3 -10 -21 3462.30 248.745   3
  -3 -10  20 5477.28 320.002   4
   3 -10 -20 5813.25 314.822   3
   3  10 -20 5549.75 315.873   3
   3 -10 -19 5052.51 283.714   3
   3  10 -19 4772.52 284.642   3
  -3 -10  19 4839.58 296.958   4
   3 -10 -18 2113.35 177.374   3
  -3 -10  18 1915.64 187.670   4
   3  10 -18 1755.95 171.457   3
   3 -10 -17 3440.08 216.766   3
  -3 -10  17 3590.06 240.313   4
   3  10 -17 3836.82 239.064   3
   3 -10 -16 74.4083 60.6976   3
   3  10 -16 56.9384 42.1699   1
  -3 -10  16-96.5416 78.4378   4
   3  10 -16 43.3420 63.0397   3
   3  10 -15-47.5263 68.7031   6
   3  10 -15-10.0137 56.6919   3
   3 -10 -15 43.9283 58.2987   3
  -3 -10  15 64.2807 74.2793   4
   3  10 -15-10.3186 41.8065   1
   3  10 -14 2661.86 146.770   1
   3  10 -14 2479.22 167.837   6
   3 -10 -14 2619.26 170.746   3
  -3 -10  14 2753.73 197.437   4
   3  10 -14 2746.96 182.853   3
   3  10 -13 2281.46 158.490   6
  -3 -10  13 2303.30 179.268   4
   3 -10 -13 2391.57 158.311   3
   3  10 -13 2256.59 135.194   1
   3  10 -13 2345.93 166.180   3
   3 -10 -12 7376.63 270.730   7
  -3 -10  12 7156.34 299.650   4
   3  10 -12 7138.18 273.741   6
   3 -10 -12 6885.14 256.057   3
   3  10 -12 6897.97 273.630   3
   3  10 -12 6908.83 237.772   1
   3  10 -11 6938.74 262.750   6
   3  10 -11 6641.57 263.183   3
   3  10 -11 6369.03 226.353   1
   3 -10 -11 6630.61 243.785   3
  -3  10  11 6400.09 238.196   5
  -3 -10  11 6414.24 275.717   4
   3 -10 -11 6435.51 247.238   7
  -3  10  10 13911.0 352.776   5
   3  10 -10 14031.0 353.842   1
  -3 -10  10 14302.4 417.297   4
   3  10 -10 14493.6 391.367   3
   3 -10 -10 14967.6 370.304   3
   3  10 -10 15098.5 396.541   6
   3 -10 -10 14105.8 378.626   7
  -3  10   9 10059.9 276.565   5
   3  10  -9 10313.1 291.564   1
   3  10  -9 10417.8 317.121   3
   3 -10  -9 10262.9 287.655   3
  -3 -10   9 9830.96 333.991   4
  -3  10   9 10049.5 304.867   1
   3 -10  -9 9474.53 299.032   7
   3  10  -8 13533.6 343.709   1
  -3  10   8 13298.7 309.752   5
   3 -10  -8 14236.0 363.316   7
  -3  10   8 13814.6 358.594   1
  -3 -10   8 13246.8 386.144   4
   3  10  -8 13481.0 361.324   3
  -3  10   7 14050.0 304.239   5
  -3  10   7 13996.6 282.932   2
   3  10  -7 13989.1 353.978   5
   3 -10  -7 14936.2 369.219   7
   3  10  -7 14178.8 366.363   3
  -3  10   7 14070.9 361.367   1
   3  10  -7 13975.6 350.139   1
  -3 -10   7 14137.6 390.993   4
   3  10  -6 4279.27 183.435   1
  -3  10   6 4456.96 191.276   1
  -3  10   6 4518.67 149.585   5
   3  10  -6 4356.86 183.749   5
   3  10  -6 4327.04 190.867   3
   3 -10  -6 4465.66 188.311   7
  -3  10   6 4229.74 127.922   2
  -3 -10   5 50.5860 50.8537   7
  -3  10   5 69.2902 35.0284   5
   3 -10  -5 83.8367 46.5168   7
   3  10  -5 78.2516 55.2890   1
  -3 -10   5-5.17826 38.3396   2
   3  10  -5 59.5958 41.0921   5
  -3  10   5 76.4957 52.5874   1
   3 -10  -5 76.5346 28.0346   2
  -3  10   4 2675.06 98.7778   5
   3  10  -4 2552.49 136.230   5
  -3 -10   4 2704.90 137.622   2
   3 -10  -4 2764.96 89.0609   2
   3 -10  -4 2766.35 146.289   7
   3  10  -4 2492.36 144.009   1
  -3  10   4 2815.08 152.767   1
  -3 -10   4 2667.26 147.454   7
   3 -10  -3 885.697 60.5547   3
  -3  10   3 934.119 53.2962   5
   3  10  -3 869.821 89.4035   1
   3  10  -3 872.118 84.4601   5
  -3 -10   3 900.593 81.9419   2
   3 -10  -3 860.614 44.5464   2
  -3 -10   3 884.863 88.8623   7
   3 -10  -3 953.028 91.1155   7
  -3  10   3 882.334 91.0935   1
  -3 -10   2 8431.18 249.110   2
   3 -10  -2 8815.30 266.060   7
  -3 -10   2 8752.23 267.377   7
  -3  10   2 8806.00 272.591   1
  -3  10   2 8813.56 171.516   5
   3  10  -2 8493.65 268.923   1
   3 -10  -2 8532.95 150.040   2
   3 -10  -2 8596.97 191.192   3
   3  10  -2 8642.92 252.953   5
   3 -10  -1 3854.52 175.085   7
  -3 -10   1 3900.97 174.236   7
   3  10  -1 3944.03 165.662   5
  -3  10   1 3916.04 101.380   5
   3 -10  -1 3874.70 83.9146   2
  -3  10   1 4038.58 182.044   1
  -3 -10   1 4212.39 170.725   2
   3  10  -1 3962.94 180.468   1
   3 -10  -1 3918.54 114.407   3
   3 -10   0 8325.56 168.415   3
   3  10   0 7669.04 237.462   5
  -3 -10   0 7474.76 248.837   7
   3 -10   0 7621.70 248.872   7
   3  10   0 7444.14 255.141   1
  -3 -10   0 7659.95 235.941   2
   3 -10   0 7268.78 130.348   2
  -3 -10  -1 5395.28 197.351   2
   3 -10   1 5544.60 210.516   7
   3  10   1 5044.63 193.008   5
   3  10   1 5628.17 219.488   1
   3 -10   1 5154.79 128.159   3
   3 -10   1 4962.02 108.250   2
  -3 -10  -1 5513.27 212.778   7
   3 -10   2 20152.9 317.366   3
   3 -10   2 19371.3 299.187   2
  -3 -10  -2 20898.3 436.448   2
   3 -10   2 20111.3 311.518   5
  -3 -10  -2 20401.4 453.538   7
   3  10   2 21549.9 441.407   5
   3 -10   3 1216.38 58.0500   2
   3 -10   3 1358.80 63.7231   3
  -3 -10  -3 1254.52 102.694   2
   3  10   3 1284.94 103.334   5
  -3 -10  -3 1285.18 112.388   7
   3 -10   3 1203.23 59.1305   5
   3 -10   4 9959.77 205.068   5
   3 -10   4 9991.57 202.746   3
   3 -10   4 10153.9 215.426   2
   3  10   4 9776.87 292.873   5
  -3 -10  -4 9939.63 294.382   2
  -3 -10  -4 9413.55 299.447   7
   3  10   5 897.979 100.748   5
  -3 -10  -5 884.448 94.7544   2
   3 -10   5 740.330 52.9883   3
  -3  10  -5 765.968 59.6624   6
   3 -10   5 713.773 57.8725   2
   3 -10   5 745.758 56.9524   5
  -3 -10  -5 701.403 93.4939   7
  -3 -10  -6 292.579 65.3995   2
   3  10   6 419.588 79.5006   5
   3 -10   6 262.593 40.4008   5
  -3  10  -6 246.711 40.1452   3
   3 -10   6 429.677 47.5622   3
  -3  10  -6 299.835 50.3358   6
   3 -10   6 398.526 53.3068   2
  -3  10  -7 4123.64 140.706   6
   3  10   7 4567.66 209.617   5
  -3  10  -7 4386.31 149.341   3
  -3 -10  -7 4733.84 212.678   2
   3 -10   7 4763.65 149.262   3
  -3  10  -8 2492.96 111.543   6
   3  10   8 3052.60 178.618   5
  -3 -10  -8 2595.30 161.128   2
  -3  10  -8 2408.15 115.066   3
  -3 -10  -9 7313.85 282.450   2
  -3  10  -9 7191.82 216.804   3
   3  10   9 7209.41 280.695   5
  -3 -10 -10 12810.5 391.965   2
  -3  10 -10 12630.8 314.494   3
   3  10  10 12375.0 388.987   5
  -3  10 -11 11399.1 308.285   3
   3  10  11 10676.7 370.294   5
  -3 -10 -11 10637.8 365.769   2
   3  10  12 11013.0 383.796   5
  -3  10 -12 10641.5 312.440   3
  -3 -10 -12 10283.1 372.562   2
   3  10  13 12275.5 420.175   5
  -3 -10 -13 11472.4 403.191   2
  -3  10 -13 11843.5 346.412   3
   3  10  14 7539.10 336.371   5
  -3  10 -14 7416.83 282.043   3
  -3 -10 -14 7891.21 337.755   2
   3  10  15 10836.5 419.721   5
  -3 -10 -15 10909.9 416.134   2
   3 -10  16 1372.44 145.789   4
  -3 -10 -16 1623.33 169.485   2
   3  10  16 1623.19 185.569   5
   3 -10  17 1212.56 141.534   4
  -3 -10 -17 1345.09 166.771   2
  -3 -10 -17 1273.12 166.379   3
   3  10  17 1209.75 163.475   5
  -3 -10 -18 14.9323 77.1174   3
   3 -10  18 50.4155 77.3526   4
   3 -10  19 190.405 84.6184   4
   3  10  19-158.784 99.8810   5
   3  11 -21 383.465 110.084   3
   3  11 -20 997.826 144.434   3
  -3 -11  20 892.794 151.409   4
   3 -11 -20 966.695 140.643   3
  -3 -11  19 218.499 85.3592   4
   3  11 -19 380.016 110.582   3
   3 -11 -19 295.873 91.7925   3
   3 -11 -18 4190.81 254.153   3
  -3 -11  18 4714.13 291.229   4
   3  11 -18 4451.30 272.164   3
   3 -11 -17 1512.42 151.090   3
  -3 -11  17 1290.94 165.502   4
   3  11 -17 1418.89 157.874   3
   3  11 -16 9998.08 365.764   6
   3 -11 -16 9389.99 355.539   3
   3  11 -16 9714.97 378.754   3
   3  11 -16 9238.20 299.059   1
  -3 -11  16 9454.03 395.150   4
   3  11 -15 551.467 89.2361   6
  -3  11  15 462.468 97.9555   5
   3  11 -15 603.888 80.7273   1
   3 -11 -15 588.035 97.5589   3
  -3 -11  15 491.480 95.3448   4
   3  11 -15 642.927 107.618   3
   3  11 -14 11052.4 329.247   1
  -3  11  14 11265.8 373.887   5
   3 -11 -14 11805.3 376.191   3
  -3 -11  14 11182.8 412.515   4
   3  11 -14 12012.4 398.182   3
   3 -11 -14 11255.7 370.131   7
   3  11 -14 11570.5 376.831   6
  -3  11  13 846.034 109.649   5
  -3 -11  13 716.913 113.939   4
   3 -11 -13 794.758 101.078   3
   3  11 -13 526.805 85.7149   6
   3  11 -13 809.960 107.225   3
   3  11 -13 791.780 89.6603   1
   3 -11 -13 728.398 100.349   7
  -3  11  12 1473.73 127.497   5
   3  11 -12 1549.83 120.833   1
   3 -11 -12 1362.08 120.209   3
   3  11 -12 1490.99 130.941   6
   3 -11 -12 1684.74 145.827   7
   3  11 -12 1582.06 138.321   3
  -3 -11  12 1374.23 141.881   4
   3  11 -11 204.436 67.5895   6
  -3  11  11 145.487 60.9796   5
   3  11 -11 155.862 57.2247   1
   3  11 -11 137.118 63.5117   3
   3 -11 -11 135.719 53.1340   3
  -3 -11  11 160.141 70.2539   4
   3 -11 -11 304.431 75.4464   7
   3  11 -10 3161.67 181.192   6
  -3  11  10 2848.23 152.764   5
  -3 -11  10 3077.41 198.091   4
   3  11 -10 3054.84 179.964   3
   3 -11 -10 3050.62 159.677   3
   3  11 -10 2909.00 158.561   1
   3 -11 -10 3189.44 180.561   7
  -3  11   9 880.116 99.3587   1
   3 -11  -9 1121.07 102.747   3
   3  11  -9 1134.35 102.978   1
  -3 -11   9 879.733 116.544   4
  -3  11   9 903.062 85.6954   5
   3  11  -9 863.498 102.771   3
   3 -11  -9 839.151 98.5480   7
  -3 -11   8 28499.1 626.391   4
  -3  11   8 28266.4 509.715   5
   3  11  -8 28241.0 565.681   1
  -3  11   8 28614.8 586.039   1
   3 -11  -8 27511.8 578.439   7
   3  11  -8 28648.2 588.099   3
   3 -11  -7-55.3176 55.6809   7
   3  11  -7 52.9490 48.6376   5
  -3  11   7 70.1350 56.8621   1
  -3  11   7-4.53576 33.7964   5
   3  11  -7-9.23087 47.7122   3
   3  11  -7 48.8837 50.9524   1
   3 -11  -6 30002.5 592.452   7
   3  11  -6 29267.9 567.744   5
   3  11  -6 29453.4 581.919   1
  -3  11   6 29346.4 593.140   1
  -3  11   6 29761.0 489.421   5
  -3 -11   5 73.6653 46.8187   7
   3  11  -5 34.6419 44.0657   5
  -3  11   5 60.0209 31.0530   5
  -3  11   5 28.4085 54.5119   1
  -3 -11   5 72.7311 38.7097   2
   3  11  -5 55.1387 52.4180   1
   3 -11  -5 54.0768 22.3767   2
   3 -11  -5 165.105 65.2745   7
   3 -11  -4 47582.8 808.550   7
   3  11  -4 46853.9 779.771   5
  -3 -11   4 46757.3 809.509   7
  -3  11   4 47432.4 817.202   1
   3 -11  -4 48015.0 635.630   2
   3 -11  -4 47858.2 704.816   3
   3  11  -4 47202.1 809.301   1
  -3 -11   4 47479.7 777.786   2
  -3  11   4 48489.6 664.501   5
  -3  11   3 653.355 48.2984   5
   3  11  -3 535.064 73.9265   5
   3  11  -3 631.739 87.9677   1
  -3  11   3 674.654 88.0670   1
   3 -11  -3 587.966 37.3808   2
  -3 -11   3 540.534 81.6199   7
   3 -11  -3 612.427 58.1505   3
  -3 -11   3 582.326 72.9855   2
   3 -11  -3 617.586 83.2468   7
  -3  11   2 50693.5 850.288   1
  -3 -11   2 51029.2 847.720   7
   3  11  -2 51943.7 817.008   5
  -3  11   2 51357.2 666.718   5
   3  11  -2 50774.0 851.758   1
   3 -11  -2 49278.1 630.038   2
  -3 -11   2 50924.9 809.940   2
   3 -11  -2 50818.6 841.664   7
   3 -11  -2 48809.4 697.937   3
  -3  11   1 1265.72 58.7405   5
   3 -11  -1 1500.57 72.8326   3
  -3  11   1 1484.71 122.676   1
   3  11  -1 1782.25 131.091   1
  -3 -11   1 1333.10 102.146   2
   3 -11  -1 1386.07 113.812   7
  -3 -11   1 1433.48 116.745   7
   3 -11  -1 1319.14 47.7136   2
   3  11  -1 1261.80 99.2677   5
   3 -11   0 14989.7 266.565   3
   3 -11   0 14041.8 219.924   2
   3  11   0 15567.3 366.586   5
  -3 -11   0 15009.7 361.613   2
   3  11   0 14906.5 393.084   1
  -3  11   0 15435.9 392.890   1
  -3 -11   0 15426.6 391.075   7
   3 -11   0 14910.2 382.692   7
   3 -11   1 5057.62 133.226   3
  -3 -11  -1 5395.59 204.796   2
   3  11   1 5260.75 224.661   1
  -3  11  -1 4861.68 214.124   1
  -3 -11  -1 5139.68 217.749   7
   3 -11   1 5319.39 216.928   7
   3 -11   1 4975.76 111.286   2
   3  11   1 5477.77 206.289   5
   3  11   2 306.835 62.3392   5
   3 -11   2 346.741 36.9167   3
  -3 -11  -2 337.374 65.4075   2
   3 -11   2 402.668 36.9920   5
   3 -11   2 345.841 31.0791   2
  -3 -11  -2 418.223 72.8572   7
   3 -11   3 2890.83 97.8254   5
  -3 -11  -3 2647.39 149.893   2
   3 -11   3 2711.12 96.0819   3
   3 -11   3 2842.54 93.3431   2
  -3 -11  -3 2596.79 159.833   7
   3  11   3 2985.55 157.145   5
   3  11   4 10806.3 316.822   5
   3 -11   4 10922.9 217.049   2
   3 -11   4 10918.0 226.537   2
  -3 -11  -4 10498.3 312.862   2
   3 -11   4 9959.63 214.552   3
  -3 -11  -4 11423.5 341.891   7
  -3 -11  -5 3928.23 188.400   2
   3  11   5 3704.70 183.936   5
  -3 -11  -5 3493.41 192.635   7
  -3  11  -6 33423.5 533.060   6
   3  11   6 32986.5 652.953   5
  -3 -11  -6 33644.8 677.901   7
  -3 -11  -6 33405.8 654.878   2
  -3  11  -7 3695.43 137.720   6
  -3 -11  -7 3959.90 199.793   2
  -3  11  -7 3654.78 133.842   3
   3  11   7 3634.03 195.436   5
   3  11   8 31282.2 654.932   5
  -3  11  -8 31911.7 520.630   6
  -3 -11  -8 31138.2 651.861   2
  -3  11  -8 31564.0 526.398   3
   3  11   9 1985.72 154.280   5
  -3 -11  -9 2286.02 162.603   2
  -3  11  -9 1996.66 109.977   3
   3  11  10 11954.7 390.217   5
  -3 -11 -10 12189.4 389.462   2
  -3  11 -10 12076.9 304.747   3
   3  11  11 130.240 69.3271   5
  -3 -11 -11 53.0832 59.9905   2
  -3  11 -11 71.6587 39.9369   3
   3  11  12 466.107 101.113   5
  -3 -11 -12 653.054 125.963   2
  -3 -11 -13 1035.72 133.605   2
   3  11  13 1603.61 161.784   5
   3  11  14 148.950 80.2560   5
  -3 -11 -14 148.223 77.8458   2
   3  11  15 41.9428 86.8983   5
  -3 -11 -15 133.742 69.5588   2
   3  11  16 4116.15 275.890   5
  -3 -11 -16 4362.54 271.400   2
   3  11  17 780.107 146.610   5
  -3 -11 -17 440.224 106.838   3
  -3 -11 -17 264.727 88.1204   2
  -3 -11 -18 8710.60 404.456   3
   3  11  18 9169.72 426.425   5
   3 -12 -20 4931.01 289.743   3
   3  12 -20 4885.88 307.675   3
   3 -12 -19 3206.10 235.421   3
  -3  12  19 3308.09 250.333   5
   3  12 -19 2779.50 236.945   3
  -3  12  18 2241.02 207.563   5
   3 -12 -18 2328.25 192.711   3
  -3 -12  18 2231.10 217.001   4
   3 -12 -18 1951.32 177.235   7
   3  12 -18 1847.06 189.436   3
   3  12 -17 43.7132 87.2811   3
   3 -12 -17 101.457 68.7449   7
  -3 -12  17 216.089 102.222   4
  -3  12  17 108.544 82.1883   5
   3 -12 -17 230.232 79.1276   3
  -3  12  16 540.551 107.645   5
   3 -12 -16 246.957 72.6320   7
   3  12 -16 432.881 100.957   6
   3  12 -16 490.374 106.970   3
  -3 -12  16 314.027 113.989   4
   3 -12 -16 328.133 81.1359   3
   3 -12 -15 3008.15 200.048   3
   3  12 -15 3754.38 230.395   3
  -3 -12  15 3290.58 239.340   4
   3 -12 -15 3314.54 209.887   7
  -3  12  15 3254.26 209.759   5
   3  12 -15 3210.47 180.645   1
   3  12 -15 3446.46 212.996   6
   3  12 -14 106.706 66.2772   6
   3  12 -14 17.1248 47.4208   1
   3 -12 -14-99.3077 69.3396   3
  -3 -12  14 105.679 92.8341   4
   3  12 -14 25.5707 54.2395   3
  -3  12  14 73.6228 74.7944   5
   3 -12 -14 73.9646 67.5068   7
   3 -12 -13 10836.0 353.432   3
  -3  12  13 10547.0 349.015   5
   3  12 -13 10785.1 366.544   6
   3  12 -13 9900.10 324.129   1
  -3 -12  13 10531.4 404.374   4
   3  12 -13 10376.1 369.830   3
   3 -12 -13 10639.3 364.535   7
  -3  12  12 971.355 102.075   5
   3 -12 -12 1152.62 113.646   3
   3  12 -12 1030.93 115.826   6
   3  12 -12 940.944 117.483   3
   3  12 -12 1027.33 105.601   1
   3 -12 -12 1017.02 113.685   7
  -3 -12  12 912.660 127.681   4
   3  12 -11 18645.0 460.838   1
   3  12 -11 19221.8 496.782   3
   3 -12 -11 19133.0 464.497   3
  -3 -12  11 19591.9 543.165   4
   3 -12 -11 19496.8 495.588   7
  -3  12  11 18509.3 443.062   5
   3  12 -11 19315.1 492.629   6
   3  12 -10 3347.46 183.004   1
  -3  12  10 3548.86 170.150   5
   3  12 -10 3240.86 189.436   6
  -3 -12  10 3720.08 223.652   4
   3 -12 -10 3675.74 200.843   7
   3 -12 -10 3367.49 173.479   3
   3  12 -10 3412.75 192.601   3
   3 -12  -9 27849.9 601.717   7
  -3  12   9 27467.7 522.280   5
   3 -12  -9 27049.7 548.926   3
  -3  12   9 27106.3 596.695   1
   3  12  -9 27054.0 593.321   3
   3  12  -9 26567.8 571.474   1
  -3  12   8 3272.70 186.892   1
  -3  12   8 3269.09 147.214   5
   3  12  -8 2970.13 171.174   1
   3 -12  -8 3173.86 183.057   7
  -3 -12   7 21158.7 478.949   2
   3 -12  -7 21897.3 508.417   7
  -3  12   7 21948.2 416.274   5
  -3  12   7 20857.3 503.534   1
   3  12  -7 21659.1 497.605   1
   3 -12  -6 3617.81 189.193   7
  -3  12   6 3667.61 193.417   1
   3  12  -6 3709.35 179.758   5
  -3 -12   6 3709.27 178.493   2
   3  12  -6 3741.80 191.229   1
  -3  12   6 3655.29 139.326   5
  -3  12   5 4845.21 149.718   5
   3 -12  -5 5145.43 223.824   7
  -3  12   5 5017.26 224.729   1
   3  12  -5 5292.81 213.727   5
  -3 -12   5 4913.81 204.618   2
   3  12  -5 4719.22 214.204   1
  -3 -12   5 4827.48 219.844   7
   3 -12  -4 392.677 72.2308   7
  -3 -12   4 314.698 65.2607   2
   3  12  -4 290.818 57.8513   5
   3 -12  -4 337.907 34.5644   2
  -3  12   4 443.381 83.3083   1
  -3 -12   4 505.590 81.0050   7
   3  12  -4 407.931 78.6073   1
  -3  12   4 361.738 43.5626   5
  -3  12   3 6492.35 256.900   1
  -3  12   3 6641.37 162.288   5
   3 -12  -3 6426.49 249.795   7
   3 -12  -3 6456.46 137.068   2
   3  12  -3 6538.61 255.579   1
   3  12  -3 6553.59 233.932   5
  -3 -12   3 6937.99 239.139   2
  -3 -12   3 6193.13 247.884   7
  -3  12   2 3.50617 53.0017   1
   3  12  -2 41.0823 46.1561   5
  -3 -12   2 37.0443 51.7673   7
   3 -12  -2 29.4644 12.5132   2
  -3 -12   2-16.0049 44.2443   2
   3  12  -2 14.9357 52.1522   1
   3 -12  -2 60.3232 53.0945   7
   3  12  -1 17899.5 411.795   5
  -3  12   1 17488.8 441.987   1
  -3  12   1 17610.3 286.707   5
   3 -12  -1 16477.5 247.866   2
  -3 -12   1 17844.4 409.348   2
   3  12  -1 17264.6 444.020   1
  -3 -12   1 17685.2 440.891   7
   3 -12  -1 17412.4 433.470   7
   3 -12   0 1145.30 114.738   7
   3  12   0 913.550 93.2906   5
   3 -12   0 773.891 38.1381   2
  -3 -12   0 1010.58 107.901   7
   3  12   0 847.933 102.687   1
  -3 -12   0 1007.38 95.9875   2
  -3  12   0 1054.11 111.192   1
   3 -12   1 19975.0 296.717   2
   3  12   1 21720.2 468.302   5
  -3 -12  -1 21274.7 497.575   7
  -3 -12  -1 21118.0 462.141   2
  -3  12  -1 21880.1 504.588   1
  -3 -12  -2 2154.02 153.907   7
   3  12   2 2013.00 132.665   5
  -3 -12  -2 2229.70 141.954   2
   3 -12   2 1914.72 69.4443   2
  -3  12  -2 1994.21 147.661   1
  -3 -12  -3 14339.8 404.773   7
   3  12   3 14437.6 379.470   5
  -3 -12  -3 14449.6 380.131   2
   3 -12   3 14152.4 250.077   2
   3 -12   4 2091.61 84.7790   2
  -3 -12  -4 1969.14 134.100   2
   3  12   4 2027.65 141.517   5
  -3 -12  -4 2054.69 152.039   7
  -3 -12  -5 10349.4 346.439   7
   3  12   5 10418.0 328.533   5
   3 -12   5 10926.5 230.989   2
  -3 -12  -5 10662.0 331.644   2
  -3 -12  -6 2020.06 148.202   2
   3  12   6 1996.95 146.226   5
  -3 -12  -6 1928.41 155.400   7
  -3  12  -6 1876.53 101.317   6
  -3 -12  -7 1309.90 122.050   2
  -3  12  -7 1299.20 86.3256   6
   3  12   7 1413.44 127.137   5
  -3 -12  -7 1078.23 118.742   7
   3  12   8 5788.26 257.673   5
  -3 -12  -8 6384.93 267.554   2
  -3 -12  -8 5972.10 272.151   7
   3  12   9 3452.99 206.343   5
  -3 -12  -9 3107.02 194.835   2
   3  12  10 3901.46 225.815   5
  -3 -12 -10 3986.62 223.340   2
   3  12  11 11892.7 407.745   5
  -3 -12 -11 11167.4 392.856   2
   3  12  12 5983.88 293.173   5
  -3 -12 -12 6202.18 298.797   2
  -3 -12 -13 10633.5 403.391   2
   3  12  13 10587.5 406.119   5
  -3 -12 -14 5301.69 287.461   2
   3  12  14 5710.46 303.892   5
   3  12  15 4910.36 294.974   5
  -3 -12 -15 4693.45 279.829   2
   3  12  16 1407.07 174.543   5
  -3 -12 -16 1943.18 187.698   2
  -3 -12 -17 1005.35 148.991   2
   3  12  17 937.754 158.905   5
  -3 -12 -17 925.108 143.141   3
   3 -13 -19 5413.81 300.066   3
   3 -13 -19 5311.35 293.373   7
   3 -13 -18 2115.76 187.115   3
   3  13 -18 2330.18 211.131   3
   3 -13 -18 2165.56 193.150   7
   3 -13 -17 5781.22 297.530   7
  -3 -13  17 5915.95 344.417   4
   3 -13 -17 6932.02 320.661   3
   3  13 -17 6448.84 329.162   3
   3  13 -16 5251.39 276.633   6
   3 -13 -16 5518.59 278.488   3
  -3 -13  16 4977.09 312.426   4
   3  13 -16 5397.64 295.253   3
   3 -13 -16 4975.82 268.039   7
  -3 -13  15 12552.0 476.032   4
   3 -13 -15 11944.2 412.196   3
   3  13 -15 12770.8 441.868   3
   3  13 -15 12093.1 378.758   1
   3 -13 -15 11977.9 416.664   7
   3  13 -15 11593.9 408.448   6
  -3 -13  14 3942.04 259.305   4
   3 -13 -14 3469.64 207.741   3
   3  13 -14 3941.34 210.013   1
  -3  13  14 3942.44 219.793   5
   3  13 -14 3840.82 226.019   6
   3  13 -14 3691.90 228.297   3
   3 -13 -14 3545.43 219.572   7
   3  13 -13 11089.7 359.654   1
   3  13 -13 11248.2 386.044   6
   3 -13 -13 10956.6 383.636   7
   3 -13 -13 11444.0 372.438   3
  -3 -13  13 11103.0 430.856   4
  -3  13  13 11283.4 362.464   5
   3  13 -13 11543.4 398.839   3
   3  13 -12 3835.42 228.084   3
   3  13 -12 4129.70 226.253   6
   3 -13 -12 4445.16 238.333   7
   3 -13 -12 4140.77 210.951   3
   3  13 -12 4218.46 214.581   1
  -3  13  12 4112.84 202.971   5
  -3  13  11 872.912 99.2530   5
   3  13 -11 723.035 101.115   6
   3 -13 -11 680.881 90.3682   3
   3  13 -11 484.277 83.8013   1
   3  13 -11 680.277 99.5833   3
   3 -13 -11 583.633 103.800   7
   3 -13 -10 2483.18 152.472   3
   3  13 -10 2680.30 179.666   3
   3 -13 -10 2638.72 180.140   7
  -3  13  10 2815.66 154.477   5
   3  13 -10 2494.14 168.688   1
   3  13 -10 2907.18 182.927   6
  -3  13   9 2884.01 148.035   5
   3  13  -9 2610.75 169.050   1
  -3  13   9 2972.75 190.063   1
   3 -13  -9 2749.41 159.037   3
   3 -13  -9 2917.15 183.573   7
  -3  13   8 1738.25 110.319   5
  -3  13   8 1781.62 148.793   1
   3  13  -8 1661.95 138.849   1
   3 -13  -8 1771.82 149.452   7
  -3 -13   8 1615.80 129.483   2
  -3  13   7 7686.71 299.615   1
  -3  13   7 7967.94 227.182   5
   3  13  -7 7412.22 286.480   1
   3 -13  -7 8578.23 312.120   7
  -3 -13   7 8324.00 284.135   2
   3 -13  -6-4.11486 53.7927   7
  -3 -13   6-45.9155 43.2318   2
  -3  13   6 5.95154 59.1960   1
   3  13  -6 28.7228 52.8512   1
   3  13  -6-35.2242 49.5327   5
  -3  13   6 32.8636 37.8002   5
  -3 -13   5 19617.5 491.524   7
  -3  13   5 19325.9 356.100   5
  -3  13   5 19265.0 492.155   1
  -3 -13   5 18641.4 445.720   2
   3 -13  -5 19021.8 482.233   7
   3  13  -5 18973.2 483.634   1
   3  13  -5 19101.3 452.428   5
  -3 -13   4 371.966 81.9022   7
  -3 -13   4 272.974 61.7087   2
   3 -13  -4 335.518 79.4271   7
   3  13  -4 353.091 73.0238   5
  -3  13   4 314.020 71.5971   1
   3  13  -4 422.344 82.1971   1
   3  13  -3 22312.8 529.347   1
  -3 -13   3 21938.6 522.254   7
   3  13  -3 20489.8 470.514   5
   3 -13  -3 21783.4 518.377   7
  -3 -13   3 21680.3 480.007   2
  -3  13   3 21813.7 527.369   1
  -3 -13   2 789.294 104.550   7
   3  13  -2 920.505 100.326   5
  -3  13   2 699.670 98.1409   1
   3  13  -2 811.477 104.684   1
  -3 -13   2 716.953 85.9998   2
   3 -13  -2 667.545 95.7763   7
  -3  13   1 7395.39 286.812   1
  -3 -13   1 7005.39 280.437   7
   3  13  -1 7349.98 259.454   5
  -3 -13   1 7233.30 257.372   2
   3  13  -1 7332.58 290.403   1
   3 -13  -1 7491.37 284.235   7
   3  13   0 3771.15 183.955   5
  -3 -13   0 3658.69 201.272   7
  -3  13   0 3488.04 198.507   1
  -3 -13   0 3634.19 180.603   2
   3  13   0 3701.12 207.601   1
   3 -13   0 3661.67 199.353   7
  -3 -13  -1 119.149 58.1704   2
  -3 -13  -1 133.498 65.5176   7
  -3  13  -1 75.6831 55.5062   1
   3  13   1 152.941 62.1670   5
  -3 -13  -2 1527.83 141.372   7
  -3  13  -2 1685.06 140.154   1
   3  13   2 1542.49 126.621   5
  -3 -13  -2 1628.95 126.153   2
   3  13   3 3487.23 185.453   5
  -3 -13  -3 3247.73 197.314   7
  -3  13  -3 3231.00 192.109   1
  -3 -13  -3 3182.96 176.221   2
   3  13   4 3368.82 183.951   5
  -3 -13  -4 3443.01 185.499   2
  -3 -13  -4 3625.19 208.835   7
  -3  13  -4 4018.57 217.932   1
  -3 -13  -5 15184.3 448.027   7
   3  13   5 15670.5 425.361   5
  -3 -13  -5 15933.0 427.384   2
   3  13   6 6034.57 257.331   5
  -3 -13  -6 5902.14 273.798   7
  -3 -13  -6 6018.57 257.207   2
  -3 -13  -7 16433.6 452.891   2
  -3 -13  -7 16758.0 483.403   7
   3  13   7 16831.5 459.083   5
  -3 -13  -8 6956.55 306.162   7
   3  13   8 7079.62 294.748   5
  -3 -13  -8 7006.60 289.874   2
  -3 -13  -9 14475.8 459.203   7
  -3 -13  -9 14782.8 442.603   2
   3  13   9 13347.5 424.970   5
   3  13  10 1456.10 143.575   5
  -3 -13 -10 1216.42 139.406   7
  -3 -13 -10 1331.54 138.283   2
   3  13  11 1783.42 166.018   5
  -3 -13 -11 1688.19 161.698   2
  -3 -13 -11 1827.74 170.751   7
   3  13  12 18.1755 76.1525   5
  -3 -13 -12 153.796 74.4123   2
   3  13  13 552.832 119.482   5
  -3 -13 -13 594.718 111.441   2
   3  13  14 225.801 97.0134   5
  -3 -13 -14 126.490 86.9605   2
  -3 -13 -15 4430.06 278.582   2
   3  13  15 4044.15 269.633   5
  -3 -13 -16 686.963 123.736   2
   3  13  16 528.668 116.689   5
   3 -14 -17 1008.31 135.669   3
   3 -14 -17 922.412 134.549   7
   3  14 -16 227.891 87.3244   6
   3 -14 -16 87.7155 69.6794   7
   3 -14 -16 230.168 99.3888   3
   3  14 -16 88.0368 77.6415   3
   3 -14 -15 16.5798 69.8298   7
   3 -14 -15 32.7234 61.3864   3
   3  14 -15 96.4794 89.5905   3
   3  14 -15 16.6277 69.9232   6
   3 -14 -14 5591.47 268.308   3
   3  14 -14 5558.03 279.601   6
   3  14 -14 5445.35 259.594   1
   3  14 -14 5571.26 287.885   3
   3 -14 -14 5924.82 295.574   7
   3  14 -13 72.7825 64.1738   6
   3 -14 -13 133.297 71.1411   3
   3  14 -13-26.0376 61.0687   1
   3  14 -13 34.5607 70.8184   3
   3  14 -12 14699.8 451.733   6
   3 -14 -12 14916.1 424.261   3
   3 -14 -12 13977.4 452.278   7
   3  14 -12 14268.0 452.558   3
   3  14 -12 14337.8 432.097   1
   3  14 -11 601.457 102.497   6
   3 -14 -11 601.404 89.3921   3
   3  14 -11 557.467 97.7342   1
   3 -14 -11 447.443 97.9197   7
   3 -14 -10 19969.7 531.424   7
   3 -14 -10 19149.5 466.933   3
   3  14 -10 19206.7 515.582   6
   3  14 -10 18508.8 499.276   1
  -3 -14   9 272.211 69.0081   2
  -3  14   9 384.291 91.7346   1
   3 -14  -9 462.731 77.5056   3
   3  14  -9 378.254 84.0278   1
   3 -14  -9 306.387 83.5480   7
  -3  14   8 17077.1 484.716   1
   3  14  -8 16450.9 461.680   1
   3 -14  -8 16415.6 471.999   7
  -3 -14   8 16013.4 431.665   2
  -3  14   7 31.8260 56.6195   1
  -3 -14   7 14.9847 47.6346   2
   3  14  -7 4.71678 54.7477   1
   3 -14  -7 101.721 63.7373   7
[truncated: 824,339 more chars]
