# Supplementary material
Source: MDPI journal article supplement (https://www.mdpi.com/2304-6740/10/4/41)
Supplement: s1 [file s1 › 2dyfe.cif]

 
data_2DyFe
 
_audit_creation_method            'SHELXL-2016/6'
_shelx_SHELXL_version_number      '2016/6'
_chemical_name_systematic         ?
_chemical_name_common             ?
_chemical_melting_point           ?
_chemical_formula_moiety          
 'C17 H19 Dy Fe N13 O4, 3(H2 O)' 
_chemical_formula_sum
 'C17 H25 Dy Fe N13 O7' 
_chemical_formula_weight          741.85

loop_
 _atom_type_symbol
 _atom_type_description
 _atom_type_scat_dispersion_real
 _atom_type_scat_dispersion_imag
 _atom_type_scat_source
 'C'  'C'   0.0033   0.0016
 'International Tables Vol C Tables 4.2.6.8 and 6.1.1.4'
 'Fe'  'Fe'   0.3463   0.8444
 'International Tables Vol C Tables 4.2.6.8 and 6.1.1.4'
 'H'  'H'   0.0000   0.0000
 'International Tables Vol C Tables 4.2.6.8 and 6.1.1.4'
 'Dy'  'Dy'  -0.1892   4.4098
 'International Tables Vol C Tables 4.2.6.8 and 6.1.1.4'
 'N'  'N'   0.0061   0.0033
 'International Tables Vol C Tables 4.2.6.8 and 6.1.1.4'
 'O'  'O'   0.0106   0.0060
 'International Tables Vol C Tables 4.2.6.8 and 6.1.1.4'
 
_space_group_crystal_system       monoclinic
_space_group_IT_number            14
_space_group_name_H-M_alt         'P 21/c'
_space_group_name_Hall            '-P 2ybc'
 
_shelx_space_group_comment
;
The symmetry employed for this shelxl refinement is uniquely defined
by the following loop, which should always be used as a source of
symmetry information in preference to the above space-group names.
They are only intended as comments.
;
 
loop_
 _space_group_symop_operation_xyz
 'x, y, z'
 '-x, y+1/2, -z+1/2'
 '-x, -y, -z'
 'x, -y-1/2, z-1/2'
 
_cell_length_a                    12.6415(8)
_cell_length_b                    12.5812(7)
_cell_length_c                    17.0894(13)
_cell_angle_alpha                 90
_cell_angle_beta                  103.484(6)
_cell_angle_gamma                 90
_cell_volume                      2643.1(3)
_cell_formula_units_Z             4
_cell_measurement_temperature     150(1)
_cell_measurement_reflns_used     3930
_cell_measurement_theta_min       3.7240
_cell_measurement_theta_max       30.4680
 
_exptl_crystal_description        needle
_exptl_crystal_colour             orange
_exptl_crystal_density_meas       ?
_exptl_crystal_density_method     ?
_exptl_crystal_density_diffrn     1.864          
_exptl_crystal_F_000              1464
_exptl_transmission_factor_min    ?
_exptl_transmission_factor_max    ?
_exptl_crystal_size_max           0.337
_exptl_crystal_size_mid           0.038
_exptl_crystal_size_min           0.024
_exptl_absorpt_coefficient_mu     3.418
_shelx_estimated_absorpt_T_min    0.392
_shelx_estimated_absorpt_T_max    0.922
_exptl_absorpt_correction_T_min   0.83222
_exptl_absorpt_correction_T_max   1.00000
_exptl_absorpt_correction_type    multi-scan
_exptl_absorpt_process_details
;
CrysAlisPro 1.171.38.43d (Rigaku Oxford Diffraction, 2015)
Empirical absorption correction using spherical harmonics,
 implemented in SCALE3 ABSPACK scaling algorithm.
;
_oxdiff_exptl_absorpt_empirical_full_min           0.861
_oxdiff_exptl_absorpt_empirical_full_max           1.159
_oxdiff_exptl_absorpt_empirical_details
;
Empirical correction (ABSPACK) includes:
- Absorption correction using spherical harmonics
- Frame scaling
;
_diffrn_ambient_temperature       150(1)
_diffrn_ambient_environment       'N~2~'
_diffrn_source                    'fine-focus sealed X-ray tube'
_diffrn_source_type               'Enhance (Mo) X-ray Source'
_diffrn_radiation_probe           x-ray
_diffrn_radiation_type            'Mo K\a'
_diffrn_radiation_wavelength      0.71073
_diffrn_radiation_monochromator   graphite
_diffrn_measurement_device        'four-circle diffractometer'
_diffrn_measurement_device_type   'Xcalibur, AtlasS2, Gemini'
_diffrn_detector                  'CCD plate'
_diffrn_detector_type             'AtlasS2'
_diffrn_detector_area_resol_mean  10.4566
_diffrn_reflns_number             10290
_diffrn_reflns_av_unetI/netI      0.1181
_diffrn_reflns_av_R_equivalents   ?
_diffrn_reflns_limit_h_min        -16
_diffrn_reflns_limit_h_max        16
_diffrn_reflns_limit_k_min        -16
_diffrn_reflns_limit_k_max        16
_diffrn_reflns_limit_l_min        -22
_diffrn_reflns_limit_l_max        18
_diffrn_reflns_theta_min          3.264
_diffrn_reflns_theta_max          28.282
_diffrn_reflns_theta_full         28.282
_diffrn_measured_fraction_theta_max   0.998
_diffrn_measured_fraction_theta_full  0.998
_diffrn_reflns_Laue_measured_fraction_max    0.998
_diffrn_reflns_Laue_measured_fraction_full   0.998
_diffrn_reflns_point_group_measured_fraction_max   0.998
_diffrn_reflns_point_group_measured_fraction_full  0.998
_reflns_number_total              10290
_reflns_number_gt                 6968
_reflns_threshold_expression      'I > 2\s(I)'
_reflns_Friedel_coverage          0.000
_reflns_Friedel_fraction_max      .
_reflns_Friedel_fraction_full     .
 
_reflns_special_details
;
 _reflns_Friedel_fraction is defined as the number of unique
 Friedel pairs measured divided by the number that would be
 possible theoretically, ignoring centric projections and
 systematic absences.
;
 
_computing_data_collection       'CrysAlisPro 1.171.38.43 (Rigaku OD, 2015)'
_computing_cell_refinement       'CrysAlisPro 1.171.38.43 (Rigaku OD, 2015)'
_computing_data_reduction        'CrysAlisPro 1.171.38.43 (Rigaku OD, 2015)'
_computing_structure_solution    'SHELXS-97 (Sheldrick, 2008)'
_computing_structure_refinement  'SHELXL-2016/6 (Sheldrick, 2016)'
_computing_molecular_graphics    'DIAMOND 3.1 (Crystal Impact GbR 2005)'
_computing_publication_material  'WinGX publication routines (Farrugia, 1999)'

_refine_special_details
;
 Refined as a 2-component twin using HKLF5 reflection file. 
 Twin fraction was refined to 0.4728(9).
;
_oxdiff_twin_integration_method simultaneous
_twin_special_details
;
Component 2 rotated by 179.9883\% 
 around [-0.17 0.00 0.99] (reciprocal) or [0.00 0.00 1.00] (direct)
;
_refine_ls_structure_factor_coef  Fsqd
_refine_ls_matrix_type            full
_refine_ls_weighting_scheme       calc
_refine_ls_weighting_details
'w=1/[\s^2^(Fo^2^)+(0.0503P)^2^+4.5884P] where P=(Fo^2^+2Fc^2^)/3'
_atom_sites_solution_primary      direct
_atom_sites_solution_secondary    difmap
_atom_sites_solution_hydrogens    mixed
_refine_ls_hydrogen_treatment     mixed
_refine_ls_extinction_method      none
_refine_ls_extinction_coef        .
_refine_ls_number_reflns          10290
_refine_ls_number_parameters      403
_refine_ls_number_restraints      157
_refine_ls_R_factor_all           0.0793
_refine_ls_R_factor_gt            0.0496
_refine_ls_wR_factor_ref          0.1209
_refine_ls_wR_factor_gt           0.1157
_refine_ls_goodness_of_fit_ref    1.001
_refine_ls_restrained_S_all       0.997
_refine_ls_shift/su_max           0.002
_refine_ls_shift/su_mean          0.000
 
loop_
 _atom_site_label
 _atom_site_type_symbol
 _atom_site_fract_x
 _atom_site_fract_y
 _atom_site_fract_z
 _atom_site_U_iso_or_equiv
 _atom_site_adp_type
 _atom_site_occupancy
 _atom_site_site_symmetry_order  
 _atom_site_calc_flag
 _atom_site_refinement_flags_posn
 _atom_site_refinement_flags_adp
 _atom_site_refinement_flags_occupancy
 _atom_site_disorder_assembly
 _atom_site_disorder_group
Dy1 Dy 0.68326(3) 0.61018(3) 0.20620(3) 0.00806(10) Uani 1 1 d . . . . .
N5 N 0.8607(5) 0.5157(5) 0.2632(5) 0.0137(16) Uani 1 1 d . . . . .
N6 N 0.6305(5) 0.7625(5) 0.2890(4) 0.0087(15) Uani 1 1 d . U . . .
N7 N 0.7516(5) 0.6053(6) 0.3556(4) 0.0132(15) Uani 1 1 d . . . . .
O1 O 0.7814(4) 0.5594(5) 0.1136(4) 0.0135(13) Uani 1 1 d . . . . .
O2 O 0.5980(4) 0.7577(5) 0.1330(4) 0.0127(13) Uani 1 1 d . . . . .
O3 O 0.8277(4) 0.7329(5) 0.2213(4) 0.0178(15) Uani 1 1 d D . . . .
H3WA H 0.808(7) 0.787(5) 0.234(6) 0.027 Uiso 1 1 d D U . . .
H3WB H 0.889(3) 0.728(8) 0.242(6) 0.027 Uiso 1 1 d D U . . .
O4 O 0.5669(4) 0.5437(5) 0.0887(4) 0.0152(14) Uani 1 1 d D . . . .
H4WA H 0.518(5) 0.575(7) 0.062(5) 0.023 Uiso 1 1 d D U . . .
H4WB H 0.593(7) 0.504(6) 0.064(5) 0.023 Uiso 1 1 d D U . . .
C1 C 0.8737(7) 0.5184(7) 0.1313(6) 0.0163(14) Uani 1 1 d . U . . .
C2 C 0.5570(6) 0.8327(6) 0.1634(6) 0.0145(13) Uani 1 1 d . U . . .
C3 C 0.9822(6) 0.4094(7) 0.3686(6) 0.0179(16) Uani 1 1 d . U . . .
H3A H 0.967551 0.339693 0.342664 0.027 Uiso 1 1 calc R U . . .
H3B H 0.991295 0.401508 0.426801 0.027 Uiso 1 1 calc R U . . .
H3C H 1.048854 0.439032 0.357407 0.027 Uiso 1 1 calc R U . . .
C4 C 0.8878(6) 0.4834(7) 0.3358(6) 0.0156(13) Uani 1 1 d . U . . .
C5 C 0.8185(6) 0.5246(6) 0.3882(6) 0.0151(12) Uani 1 1 d . U . . .
C6 C 0.8240(6) 0.4892(7) 0.4668(6) 0.0158(12) Uani 1 1 d . U . . .
H6 H 0.868120 0.430075 0.488197 0.019 Uiso 1 1 calc R U . . .
C7 C 0.7637(6) 0.5422(7) 0.5127(6) 0.0160(12) Uani 1 1 d . U . . .
H7 H 0.762512 0.516819 0.564889 0.019 Uiso 1 1 calc R U . . .
C8 C 0.7055(6) 0.6316(6) 0.4829(5) 0.0151(12) Uani 1 1 d . U . . .
H8 H 0.669003 0.671941 0.515556 0.018 Uiso 1 1 calc R U . . .
C9 C 0.7011(6) 0.6621(7) 0.4029(5) 0.0131(12) Uani 1 1 d . U . . .
C10 C 0.6414(6) 0.7572(6) 0.3645(6) 0.0133(13) Uani 1 1 d . U . . .
C11 C 0.6006(6) 0.8381(7) 0.4149(6) 0.0165(16) Uani 1 1 d . U . . .
H11A H 0.619552 0.909537 0.399850 0.025 Uiso 1 1 calc R U . . .
H11B H 0.634204 0.825484 0.471869 0.025 Uiso 1 1 calc R U . . .
H11C H 0.521391 0.832054 0.405929 0.025 Uiso 1 1 calc R U . . .
N1 N 0.9299(6) 0.5000(7) 0.0763(5) 0.0225(15) Uani 1 1 d D U . . .
H1A H 0.897(7) 0.509(8) 0.031(3) 0.027 Uiso 1 1 d D U . . .
H1B H 0.993(4) 0.489(7) 0.091(6) 0.027 Uiso 1 1 d D U . . .
N2 N 0.4929(6) 0.9055(6) 0.1201(5) 0.0193(15) Uani 1 1 d D U . . .
H2A H 0.468(7) 0.887(8) 0.076(3) 0.023 Uiso 1 1 d D U . . .
H2B H 0.472(6) 0.955(5) 0.140(5) 0.023 Uiso 1 1 d D U . . .
N3 N 0.9186(5) 0.4887(6) 0.2085(5) 0.0157(14) Uani 1 1 d D U . . .
H3 H 0.975(4) 0.462(7) 0.226(6) 0.019 Uiso 1 1 d D U . . .
N4 N 0.5738(5) 0.8421(6) 0.2454(5) 0.0126(13) Uani 1 1 d D U . . .
H4 H 0.541(6) 0.890(5) 0.257(5) 0.015 Uiso 1 1 d D U . . .
Fe1 Fe 0.72019(8) 0.17417(9) 0.23614(8) 0.0094(3) Uani 1 1 d . . . . .
C12 C 0.6793(6) 0.3237(6) 0.2336(5) 0.0114(14) Uani 1 1 d . U . . .
C13 C 0.4161(6) 0.6228(7) 0.2440(5) 0.0122(14) Uani 1 1 d . U . . .
C14 C 0.7720(7) 0.0300(7) 0.2393(6) 0.0191(18) Uani 1 1 d . U . . .
C15 C 0.8588(7) 0.2122(6) 0.2151(6) 0.0144(19) Uani 1 1 d . . . . .
C16 C 0.6500(6) 0.1639(6) 0.1208(6) 0.0126(19) Uani 1 1 d . . . . .
C17 C 0.7802(6) 0.1837(7) 0.3504(6) 0.014(2) Uani 1 1 d . . . . .
N12 N 0.6621(5) 0.4134(5) 0.2307(4) 0.0123(13) Uani 1 1 d . U . . .
N13 N 0.4976(5) 0.5920(5) 0.2347(4) 0.0120(13) Uani 1 1 d . U . . .
N14 N 0.8109(6) -0.0521(6) 0.2421(5) 0.0223(17) Uani 1 1 d . U . . .
N15 N 0.9446(6) 0.2262(6) 0.2041(5) 0.025(2) Uani 1 1 d . . . . .
N16 N 0.6065(6) 0.1577(6) 0.0545(5) 0.0197(18) Uani 1 1 d . . . . .
N17 N 0.8162(6) 0.1877(7) 0.4188(5) 0.026(2) Uani 1 1 d . . . . .
O5 O 0.3716(5) 0.6227(5) 0.0064(4) 0.0212(15) Uani 1 1 d D . . . .
H5WA H 0.381(8) 0.680(4) -0.009(7) 0.032 Uiso 1 1 d D U . . .
H5WB H 0.319(5) 0.608(9) 0.020(6) 0.032 Uiso 1 1 d D U . . .
O6 O 1.1359(5) 0.3926(7) 0.0796(4) 0.0297(16) Uani 1 1 d D . . . .
H6WA H 1.106(8) 0.338(5) 0.072(8) 0.045 Uiso 1 1 d D U . . .
H6WB H 1.164(8) 0.392(10) 0.125(3) 0.045 Uiso 1 1 d D U . . .
O7 O 0.9926(6) 0.2754(6) 0.5456(5) 0.0318(18) Uani 1 1 d D . . . .
H7WA H 0.954(8) 0.236(8) 0.517(6) 0.048 Uiso 1 1 d D U . . .
H7WB H 0.974(9) 0.276(10) 0.586(4) 0.048 Uiso 1 1 d D U . . .
 
loop_
 _atom_site_aniso_label
 _atom_site_aniso_U_11
 _atom_site_aniso_U_22
 _atom_site_aniso_U_33
 _atom_site_aniso_U_23
 _atom_site_aniso_U_13
 _atom_site_aniso_U_12
Dy1 0.00907(15) 0.00694(16) 0.00865(18) -0.0005(2) 0.00302(13) 0.00039(17)
N5 0.015(3) 0.011(4) 0.017(5) 0.001(3) 0.008(3) -0.004(3)
N6 0.010(3) 0.007(3) 0.010(4) -0.003(3) 0.004(3) 0.000(2)
N7 0.017(3) 0.012(3) 0.009(4) -0.001(3) -0.002(3) -0.003(3)
O1 0.011(3) 0.021(3) 0.010(3) 0.000(3) 0.004(2) 0.002(2)
O2 0.015(3) 0.013(3) 0.010(4) -0.005(3) 0.002(2) 0.001(2)
O3 0.011(3) 0.011(3) 0.030(4) -0.001(3) 0.004(3) -0.003(2)
O4 0.013(3) 0.022(4) 0.010(4) -0.001(3) 0.002(2) 0.000(3)
C1 0.015(3) 0.020(3) 0.016(3) 0.000(3) 0.007(2) 0.003(2)
C2 0.017(3) 0.011(3) 0.015(3) -0.001(3) 0.003(2) 0.002(2)
C3 0.017(3) 0.017(3) 0.018(4) 0.002(3) 0.002(3) 0.002(3)
C4 0.016(2) 0.014(3) 0.016(3) 0.000(2) 0.003(2) -0.003(2)
C5 0.016(2) 0.013(2) 0.015(3) -0.001(2) 0.000(2) -0.003(2)
C6 0.016(2) 0.014(2) 0.015(3) 0.000(2) 0.000(2) -0.003(2)
C7 0.016(2) 0.017(2) 0.015(3) -0.001(2) 0.002(2) -0.002(2)
C8 0.014(2) 0.016(2) 0.015(3) -0.005(2) 0.002(2) 0.001(2)
C9 0.011(2) 0.015(2) 0.013(3) -0.004(2) 0.003(2) 0.003(2)
C10 0.011(2) 0.015(3) 0.015(3) -0.002(2) 0.003(2) 0.003(2)
C11 0.016(3) 0.016(3) 0.016(4) -0.001(3) 0.002(3) 0.005(3)
N1 0.018(3) 0.030(3) 0.021(4) 0.001(3) 0.008(3) 0.011(3)
N2 0.025(3) 0.015(3) 0.017(3) -0.002(3) 0.003(3) 0.012(3)
N3 0.014(3) 0.018(3) 0.015(3) -0.001(3) 0.004(2) 0.003(2)
N4 0.015(3) 0.010(3) 0.013(3) -0.002(3) 0.004(2) 0.004(2)
Fe1 0.0088(5) 0.0067(6) 0.0126(7) 0.0001(5) 0.0021(5) 0.0000(5)
C12 0.006(2) 0.013(3) 0.016(3) -0.001(3) 0.004(2) -0.002(3)
C13 0.012(3) 0.011(3) 0.013(3) -0.001(3) 0.002(2) -0.001(3)
C14 0.022(3) 0.011(3) 0.026(5) -0.002(3) 0.007(3) 0.001(3)
C15 0.019(4) 0.009(4) 0.015(5) 0.004(4) 0.002(4) 0.006(3)
C16 0.020(4) 0.005(4) 0.015(5) 0.001(4) 0.007(4) 0.001(3)
C17 0.012(4) 0.015(4) 0.016(6) 0.002(4) 0.004(4) 0.002(3)
N12 0.006(2) 0.014(3) 0.016(3) -0.001(2) 0.002(2) -0.001(2)
N13 0.011(2) 0.011(3) 0.014(3) -0.002(2) 0.003(2) -0.001(2)
N14 0.027(3) 0.013(3) 0.028(4) -0.003(3) 0.009(3) 0.003(3)
N15 0.018(4) 0.026(5) 0.030(5) 0.002(4) 0.005(4) 0.004(3)
N16 0.024(4) 0.014(4) 0.021(5) -0.005(4) 0.006(4) 0.005(3)
N17 0.026(4) 0.039(5) 0.013(5) -0.009(4) 0.004(4) 0.001(4)
O5 0.022(3) 0.022(4) 0.019(4) 0.004(3) 0.004(3) 0.003(3)
O6 0.026(4) 0.037(4) 0.026(4) 0.002(4) 0.005(3) 0.000(3)
O7 0.045(5) 0.032(4) 0.018(5) -0.001(4) 0.006(4) -0.007(3)
 
_geom_special_details
;
 All esds (except the esd in the dihedral angle between two l.s. planes)
 are estimated using the full covariance matrix.  The cell esds are taken
 into account individually in the estimation of esds in distances, angles
 and torsion angles; correlations between esds in cell parameters are only
 used when they are defined by crystal symmetry.  An approximate (isotropic)
 treatment of cell esds is used for estimating esds involving l.s. planes.
;
 
loop_
 _geom_bond_atom_site_label_1
 _geom_bond_atom_site_label_2
 _geom_bond_distance
 _geom_bond_site_symmetry_2
 _geom_bond_publ_flag
Dy1 O1 2.317(6) . ?
Dy1 O4 2.349(6) . ?
Dy1 O2 2.354(6) . ?
Dy1 O3 2.359(6) . ?
Dy1 N7 2.499(7) . ?
Dy1 N13 2.516(7) . ?
Dy1 N5 2.525(7) . ?
Dy1 N12 2.536(7) . ?
Dy1 N6 2.560(7) . ?
N5 C4 1.274(11) . ?
N5 N3 1.357(10) . ?
N6 C10 1.267(11) . ?
N6 N4 1.350(9) . ?
N7 C9 1.345(11) . ?
N7 C5 1.356(11) . ?
O1 C1 1.246(10) . ?
O2 C2 1.246(10) . ?
O3 H3WA 0.77(3) . ?
O3 H3WB 0.78(3) . ?
O4 H4WA 0.78(3) . ?
O4 H4WB 0.78(3) . ?
C1 N1 1.325(12) . ?
C1 N3 1.361(12) . ?
C2 N2 1.328(11) . ?
C2 N4 1.373(12) . ?
C3 C4 1.515(11) . ?
C3 H3A 0.9800 . ?
C3 H3B 0.9800 . ?
C3 H3C 0.9800 . ?
C4 C5 1.485(13) . ?
C5 C6 1.401(13) . ?
C6 C7 1.386(13) . ?
C6 H6 0.9500 . ?
C7 C8 1.375(12) . ?
C7 H7 0.9500 . ?
C8 C9 1.408(12) . ?
C8 H8 0.9500 . ?
C9 C10 1.484(11) . ?
C10 C11 1.501(12) . ?
C11 H11A 0.9800 . ?
C11 H11B 0.9800 . ?
C11 H11C 0.9800 . ?
N1 H1A 0.79(4) . ?
N1 H1B 0.79(4) . ?
N2 H2A 0.79(4) . ?
N2 H2B 0.78(4) . ?
N3 H3 0.78(4) . ?
N4 H4 0.78(4) . ?
Fe1 C14 1.925(9) . ?
Fe1 C17 1.927(10) . ?
Fe1 C15 1.930(9) . ?
Fe1 C13 1.942(8) 2_645 ?
Fe1 C12 1.949(8) . ?
Fe1 C16 1.968(9) . ?
C12 N12 1.148(10) . ?
C13 N13 1.146(10) . ?
C14 N14 1.140(11) . ?
C15 N15 1.156(11) . ?
C16 N16 1.141(11) . ?
C17 N17 1.152(11) . ?
O5 H5WA 0.78(3) . ?
O5 H5WB 0.78(3) . ?
O6 H6WA 0.78(3) . ?
O6 H6WB 0.78(3) . ?
O7 H7WA 0.78(4) . ?
O7 H7WB 0.78(4) . ?
 
loop_
 _geom_angle_atom_site_label_1
 _geom_angle_atom_site_label_2
 _geom_angle_atom_site_label_3
 _geom_angle
 _geom_angle_site_symmetry_1
 _geom_angle_site_symmetry_3
 _geom_angle_publ_flag
O1 Dy1 O4 69.3(2) . . ?
O1 Dy1 O2 96.1(2) . . ?
O4 Dy1 O2 73.1(2) . . ?
O1 Dy1 O3 74.4(2) . . ?
O4 Dy1 O3 129.8(2) . . ?
O2 Dy1 O3 77.83(19) . . ?
O1 Dy1 N7 125.4(2) . . ?
O4 Dy1 N7 149.7(2) . . ?
O2 Dy1 N7 124.6(2) . . ?
O3 Dy1 N7 80.2(2) . . ?
O1 Dy1 N13 141.2(2) . . ?
O4 Dy1 N13 72.9(2) . . ?
O2 Dy1 N13 80.9(2) . . ?
O3 Dy1 N13 140.5(2) . . ?
N7 Dy1 N13 85.2(2) . . ?
O1 Dy1 N5 64.2(2) . . ?
O4 Dy1 N5 119.0(2) . . ?
O2 Dy1 N5 146.3(2) . . ?
O3 Dy1 N5 70.7(2) . . ?
N7 Dy1 N5 62.0(2) . . ?
N13 Dy1 N5 131.9(2) . . ?
O1 Dy1 N12 86.4(2) . . ?
O4 Dy1 N12 74.0(2) . . ?
O2 Dy1 N12 143.58(19) . . ?
O3 Dy1 N12 136.9(2) . . ?
N7 Dy1 N12 80.3(2) . . ?
N13 Dy1 N12 74.9(2) . . ?
N5 Dy1 N12 66.1(2) . . ?
O1 Dy1 N6 146.5(2) . . ?
O4 Dy1 N6 123.2(2) . . ?
O2 Dy1 N6 63.7(2) . . ?
O3 Dy1 N6 75.2(2) . . ?
N7 Dy1 N6 61.7(2) . . ?
N13 Dy1 N6 65.6(2) . . ?
N5 Dy1 N6 117.5(2) . . ?
N12 Dy1 N6 126.0(2) . . ?
C4 N5 N3 121.6(7) . . ?
C4 N5 Dy1 122.6(6) . . ?
N3 N5 Dy1 115.2(5) . . ?
C10 N6 N4 121.2(7) . . ?
C10 N6 Dy1 122.9(5) . . ?
N4 N6 Dy1 115.1(5) . . ?
C9 N7 C5 119.3(8) . . ?
C9 N7 Dy1 120.1(5) . . ?
C5 N7 Dy1 118.2(6) . . ?
C1 O1 Dy1 124.6(6) . . ?
C2 O2 Dy1 124.0(6) . . ?
Dy1 O3 H3WA 108(7) . . ?
Dy1 O3 H3WB 132(7) . . ?
H3WA O3 H3WB 107(10) . . ?
Dy1 O4 H4WA 125(7) . . ?
Dy1 O4 H4WB 115(7) . . ?
H4WA O4 H4WB 113(10) . . ?
O1 C1 N1 121.7(9) . . ?
O1 C1 N3 120.3(8) . . ?
N1 C1 N3 117.9(7) . . ?
O2 C2 N2 123.3(9) . . ?
O2 C2 N4 120.6(7) . . ?
N2 C2 N4 116.1(8) . . ?
C4 C3 H3A 109.5 . . ?
C4 C3 H3B 109.5 . . ?
H3A C3 H3B 109.5 . . ?
C4 C3 H3C 109.5 . . ?
H3A C3 H3C 109.5 . . ?
H3B C3 H3C 109.5 . . ?
N5 C4 C5 114.5(8) . . ?
N5 C4 C3 124.4(9) . . ?
C5 C4 C3 121.1(8) . . ?
N7 C5 C6 121.2(8) . . ?
N7 C5 C4 114.4(8) . . ?
C6 C5 C4 124.3(8) . . ?
C7 C6 C5 118.6(8) . . ?
C7 C6 H6 120.7 . . ?
C5 C6 H6 120.7 . . ?
C8 C7 C6 120.1(9) . . ?
C8 C7 H7 120.0 . . ?
C6 C7 H7 120.0 . . ?
C7 C8 C9 118.7(8) . . ?
C7 C8 H8 120.7 . . ?
C9 C8 H8 120.7 . . ?
N7 C9 C8 121.4(7) . . ?
N7 C9 C10 115.2(8) . . ?
C8 C9 C10 123.4(8) . . ?
N6 C10 C9 114.6(7) . . ?
N6 C10 C11 125.4(8) . . ?
C9 C10 C11 120.0(8) . . ?
C10 C11 H11A 109.5 . . ?
C10 C11 H11B 109.5 . . ?
H11A C11 H11B 109.5 . . ?
C10 C11 H11C 109.5 . . ?
H11A C11 H11C 109.5 . . ?
H11B C11 H11C 109.5 . . ?
C1 N1 H1A 115(7) . . ?
C1 N1 H1B 118(8) . . ?
H1A N1 H1B 126(10) . . ?
C2 N2 H2A 113(7) . . ?
C2 N2 H2B 122(7) . . ?
H2A N2 H2B 124(10) . . ?
N5 N3 C1 115.3(7) . . ?
N5 N3 H3 116(7) . . ?
C1 N3 H3 129(7) . . ?
N6 N4 C2 115.8(7) . . ?
N6 N4 H4 132(7) . . ?
C2 N4 H4 111(7) . . ?
C14 Fe1 C17 88.8(4) . . ?
C14 Fe1 C15 85.4(4) . . ?
C17 Fe1 C15 90.8(4) . . ?
C14 Fe1 C13 89.5(4) . 2_645 ?
C17 Fe1 C13 90.0(4) . 2_645 ?
C15 Fe1 C13 174.9(3) . 2_645 ?
C14 Fe1 C12 175.6(3) . . ?
C17 Fe1 C12 90.1(4) . . ?
C15 Fe1 C12 90.3(3) . . ?
C13 Fe1 C12 94.8(3) 2_645 . ?
C14 Fe1 C16 92.1(4) . . ?
C17 Fe1 C16 176.5(3) . . ?
C15 Fe1 C16 92.6(4) . . ?
C13 Fe1 C16 86.7(3) 2_645 . ?
C12 Fe1 C16 89.2(3) . . ?
N12 C12 Fe1 175.1(7) . . ?
N13 C13 Fe1 177.9(8) . 2_655 ?
N14 C14 Fe1 174.5(8) . . ?
N15 C15 Fe1 174.2(8) . . ?
N16 C16 Fe1 178.0(8) . . ?
N17 C17 Fe1 178.9(9) . . ?
C12 N12 Dy1 160.2(6) . . ?
C13 N13 Dy1 154.9(6) . . ?
H5WA O5 H5WB 122(10) . . ?
H6WA O6 H6WB 103(10) . . ?
H7WA O7 H7WB 106(10) . . ?
 
loop_
 _geom_hbond_atom_site_label_D 
 _geom_hbond_atom_site_label_H 
 _geom_hbond_atom_site_label_A 
 _geom_hbond_distance_DH 
 _geom_hbond_distance_HA 
 _geom_hbond_distance_DA 
 _geom_hbond_angle_DHA 
 _geom_hbond_site_symmetry_A 
O3 H3WA N14  0.77(3) 2.03(6) 2.743(9) 153(11) 1_565
O3 H3WB N15  0.78(3) 2.09(4) 2.864(9) 176(10) 2_755
O4 H4WA O5  0.78(3) 1.97(4) 2.728(8) 164(10) .
O4 H4WB O5  0.78(3) 2.10(4) 2.866(10) 166(10) 3_665
N1 H1A O6  0.79(4) 2.22(6) 2.928(11) 149(10) 3_765
N1 H1B O6  0.79(4) 2.22(6) 2.923(10) 148(10) .
N2 H2A N16  0.79(4) 2.28(4) 3.060(12) 177(10) 3_665
N3 H3 N14  0.78(4) 2.64(5) 3.365(10) 155(9) 2_755
N4 H4 N12  0.78(4) 2.63(7) 3.230(9) 134(8) 2_655
N4 H4 N13  0.78(4) 2.60(6) 3.311(10) 151(8) 2_655
O5 H5WA N16  0.78(3) 2.21(4) 2.988(10) 175(10) 3_665
O5 H5WB N17  0.78(3) 2.42(8) 3.058(11) 140(11) 2_655
O6 H6WA O7  0.78(3) 2.00(5) 2.756(11) 163(12) 4_565
O6 H6WB N14  0.78(3) 2.32(6) 3.044(12) 154(12) 2_755
O7 H7WA N17  0.78(4) 2.21(6) 2.938(11) 157(12) .
O7 H7WB N15  0.78(4) 2.14(4) 2.911(12) 172(12) 4_566
C3 H3B O7  0.98 2.57 3.440(12) 147.3 .
C6 H6 O7  0.95 2.55 3.500(12) 178.0 .
C8 H8 O2  0.95 2.54 3.464(11) 163.7 4_576
 
_refine_diff_density_max    2.644
_refine_diff_density_min   -1.052
_refine_diff_density_rms    0.238

_shelx_res_file
;
TITL c99_1_cr2_150k
    shelx.res
    created by SHELXL-2016/6 at 19:08:00 on 24-Feb-2022
CELL 0.71073  12.6415  12.5812  17.0894  90.0000 103.484  90.0000
ZERR    4.00   0.0008   0.0007   0.0013   0.0000   0.006   0.0000
LATT   1
SYMM  - X, 1/2 + Y, 1/2 - Z
SFAC  C    Fe  H    Dy   N    O
UNIT  68   4   100  4    52   28
MERG   0
rem OMIT     0.00 180.00
shel 10 0.75
OMIT    -2  -5   5
OMIT     7 -11 -13
OMIT   -11   2 -13
OMIT    12  -8 -15
OMIT     9 -10 -14
OMIT     4   6  11
OMIT     9  -9 -14
OMIT     6 -12 -12
OMIT    16   4  -6
OMIT    14  -4 -14
OMIT     4   6  12
OMIT     9 -11 -14
OMIT    -1  -2   4
OMIT    11  -9 -15
OMIT    12  -7 -15
OMIT     2   9  -5
OMIT     0  11 -10
OMIT     2   5  11

OMIT    -2   2  -2
OMIT     4   6  10
OMIT    10  -7 -14
OMIT    15   2  -9
OMIT    15  -5  -4

OMIT     9  -7   4
OMIT    -3  12 -13
OMIT    13  -4 -14
OMIT    16   2  -9
OMIT   -11   1   2
OMIT    12  -5  -4
OMIT     3  -3 -10
OMIT     0   9 -10
OMIT    14  -5  -4
OMIT     6  -8 -12
OMIT   -14   5  -4
OMIT   -13   5  -4
OMIT     5  -7 -11
OMIT     0 -10  -6
OMIT     0 -10  -7
OMIT    12  -5 -14
omit    14  -4 -13

eqiv $1   -x+1, y+1/2, -z+1/2
eqiv $2   -x+1, y-1/2, -z+1/2
eqiv $3   x, y+1, z
eqiv $4   -x+2, y+1/2, -z+1/2
eqiv $5   -x+1, -y+1, -z
eqiv $6   x, -y+1/2, z-1/2
eqiv $7   x, -y+1/2, z+1/2
eqiv $8   x, -y+3/2, z+1/2
eqiv $9   2-x, 1-y, -z
htab
htab O3 n14_$3
htab O3 n15_$4
htab O4 O5
htab O4 O5_$5
htab N1 O6_$9
htab N1 O6
htab N2 N16_$5
htab N3 N14_$4
htab N4 N12_$1
htab N4 N13_$1
htab O5 N16_$5
htab O5 N17_$1
htab O6 O7_$6
htab O6 N14_$4
htab O7 N17
htab O7 N15_$7
htab C3 O7
htab c6 O7
htab C8 O2_$8

flat c2 n2 h2a h2b
FMAP   2
PLAN   20
ACTA   62
BOND   $H
temp -123
simu 0.002 0.003 c1 > n4 C12 > N14
isor 0.005 n6
rem isor 0.005 c5 n2 N6 c8 c12
rem delu 0.002 0.003 n1 > n4
rem isor 0.01 N4 c16 c8
rem isor 0.01 n6 n2
rem twin 1 0 0.345 0 -1 0 0 0 -1 2
rtab M...M dy1 fe1
rtab M...M dy1 fe1_$1
rtab ang fe1 Dy1 fe1_$1
rtab ang Dy1 fe1 Dy1_$2
size 0.024 0.038 0.337
acta 58
L.S.  20
sadi o3 h3wa o3 h3wb o4 h4wa o4 h4wb o5 h5wa o5 h5wb o6 h6wa o6 h6wb =
          O7 H7WA O7 H7WB
sadi n1 h1a n1 h1b n2 h2a n2 h2b n3 h3 n4 h4
rem WGHT    0.015700   47.561501
WGHT    0.050300    4.588400
BASF   0.47278
FVAR       0.34416
MOLE    1
DY1   4    0.683260    0.610181    0.206203    11.00000    0.00907    0.00694 =
         0.00865   -0.00046    0.00302    0.00039
N5    5    0.860704    0.515709    0.263171    11.00000    0.01519    0.01133 =
         0.01674    0.00130    0.00793   -0.00438
N6    5    0.630522    0.762461    0.288959    11.00000    0.00971    0.00708 =
         0.01020   -0.00348    0.00433    0.00010
N7    5    0.751590    0.605334    0.355644    11.00000    0.01650    0.01238 =
         0.00851   -0.00130   -0.00178   -0.00301
O1    6    0.781412    0.559381    0.113610    11.00000    0.01091    0.02083 =
         0.00980    0.00000    0.00430    0.00175
O2    6    0.597966    0.757697    0.133036    11.00000    0.01489    0.01314 =
         0.00955   -0.00464    0.00174    0.00112
O3    6    0.827745    0.732860    0.221255    11.00000    0.01130    0.01121 =
         0.03044   -0.00076    0.00372   -0.00293
H3WA  3    0.808326    0.786630    0.234397    11.00000   -1.50000
H3WB  3    0.889361    0.727862    0.241735    11.00000   -1.50000
O4    6    0.566916    0.543687    0.088674    11.00000    0.01337    0.02214 =
         0.00971   -0.00063    0.00172    0.00023
H4WA  3    0.518177    0.574664    0.062451    11.00000   -1.50000
H4WB  3    0.593483    0.503830    0.063895    11.00000   -1.50000
MOLE    3
C1    1    0.873680    0.518435    0.131334    11.00000    0.01498    0.01992 =
         0.01563   -0.00005    0.00676    0.00335
C2    1    0.557013    0.832716    0.163400    11.00000    0.01684    0.01138 =
         0.01516   -0.00136    0.00339    0.00248
C3    1    0.982199    0.409373    0.368556    11.00000    0.01719    0.01719 =
         0.01840    0.00214    0.00208    0.00203
AFIX 137
H3A   3    0.967551    0.339693    0.342664    11.00000   -1.50000
H3B   3    0.991295    0.401508    0.426801    11.00000   -1.50000
H3C   3    1.048854    0.439032    0.357407    11.00000   -1.50000
AFIX   0
C4    1    0.887752    0.483392    0.335780    11.00000    0.01626    0.01359 =
         0.01620    0.00039    0.00257   -0.00307
C5    1    0.818528    0.524615    0.388243    11.00000    0.01610    0.01287 =
         0.01466   -0.00099    0.00030   -0.00342
C6    1    0.823999    0.489188    0.466836    11.00000    0.01604    0.01439 =
         0.01536   -0.00033    0.00047   -0.00256
AFIX  43
H6    3    0.868120    0.430075    0.488197    11.00000   -1.20000
AFIX   0
C7    1    0.763662    0.542235    0.512747    11.00000    0.01560    0.01673 =
         0.01518   -0.00136    0.00229   -0.00160
AFIX  43
H7    3    0.762512    0.516819    0.564889    11.00000   -1.20000
AFIX   0
C8    1    0.705499    0.631575    0.482891    11.00000    0.01387    0.01603 =
         0.01457   -0.00474    0.00182    0.00145
AFIX  43
H8    3    0.669003    0.671941    0.515556    11.00000   -1.20000
AFIX   0
C9    1    0.701101    0.662059    0.402924    11.00000    0.01129    0.01485 =
         0.01335   -0.00360    0.00305    0.00250
C10   1    0.641439    0.757200    0.364467    11.00000    0.01073    0.01461 =
         0.01478   -0.00243    0.00325    0.00254
C11   1    0.600604    0.838086    0.414905    11.00000    0.01637    0.01604 =
         0.01644   -0.00085    0.00248    0.00485
AFIX 137
H11A  3    0.619552    0.909537    0.399850    11.00000   -1.50000
H11B  3    0.634204    0.825484    0.471869    11.00000   -1.50000
H11C  3    0.521391    0.832054    0.405929    11.00000   -1.50000
AFIX   0
N1    5    0.929903    0.500015    0.076252    11.00000    0.01838    0.03007 =
         0.02087    0.00118    0.00807    0.01110
rem AFIX  93
H1A   3    0.897364    0.508518    0.031174    11.00000   -1.20000
H1B   3    0.993085    0.488589    0.091000    11.00000   -1.20000
rem AFIX   0
N2    5    0.492930    0.905492    0.120064    11.00000    0.02489    0.01477 =
         0.01742   -0.00247    0.00298    0.01168
rem AFIX  93
H2A   3    0.467721    0.886858    0.075802    11.00000   -1.20000
H2B   3    0.472317    0.955005    0.139819    11.00000   -1.20000
rem AFIX   0
N3    5    0.918614    0.488682    0.208527    11.00000    0.01396    0.01839 =
         0.01509   -0.00084    0.00433    0.00272
rem AFIX  43
H3    3    0.975172    0.462128    0.226223    11.00000   -1.20000
rem AFIX   0
N4    5    0.573843    0.842084    0.245416    11.00000    0.01476    0.01007 =
         0.01324   -0.00183    0.00392    0.00396
rem AFIX  43
H4    3    0.540629    0.889590    0.257321    11.00000   -1.20000
rem AFIX   0
MOLE    2
FE1   2    0.720191    0.174174    0.236144    11.00000    0.00880    0.00674 =
         0.01257    0.00007    0.00207    0.00001
C12   1    0.679266    0.323680    0.233597    11.00000    0.00602    0.01331 =
         0.01575   -0.00105    0.00407   -0.00236
C13   1    0.416064    0.622834    0.243968    11.00000    0.01174    0.01130 =
         0.01318   -0.00148    0.00238   -0.00058
C14   1    0.772021    0.029988    0.239258    11.00000    0.02157    0.01083 =
         0.02552   -0.00175    0.00655    0.00121
C15   1    0.858801    0.212171    0.215051    11.00000    0.01860    0.00912 =
         0.01456    0.00379    0.00197    0.00564
C16   1    0.650032    0.163932    0.120814    11.00000    0.01952    0.00478 =
         0.01465    0.00108    0.00660    0.00120
C17   1    0.780231    0.183668    0.350399    11.00000    0.01198    0.01493 =
         0.01561    0.00184    0.00416    0.00201
N12   5    0.662088    0.413395    0.230735    11.00000    0.00622    0.01410 =
         0.01634   -0.00098    0.00228   -0.00114
N13   5    0.497598    0.592024    0.234663    11.00000    0.01089    0.01079 =
         0.01414   -0.00153    0.00258   -0.00125
N14   5    0.810912   -0.052135    0.242144    11.00000    0.02694    0.01268 =
         0.02833   -0.00270    0.00882    0.00307
N15   5    0.944586    0.226177    0.204142    11.00000    0.01838    0.02587 =
         0.03032    0.00240    0.00480    0.00383
N16   5    0.606537    0.157731    0.054505    11.00000    0.02361    0.01445 =
         0.02147   -0.00538    0.00605    0.00454
N17   5    0.816174    0.187667    0.418796    11.00000    0.02622    0.03886 =
         0.01348   -0.00852    0.00368    0.00117
MOLE    3
O5    6    0.371577    0.622670    0.006355    11.00000    0.02227    0.02225 =
         0.01851    0.00397    0.00356    0.00290
H5WA  3    0.381034    0.679576   -0.008543    11.00000   -1.50000
H5WB  3    0.318807    0.607904    0.019788    11.00000   -1.50000
O6    6    1.135889    0.392590    0.079560    11.00000    0.02590    0.03657 =
         0.02641    0.00229    0.00537    0.00013
H6WA  3    1.106426    0.337751    0.072354    11.00000   -1.50000
H6WB  3    1.163882    0.391583    0.125498    11.00000   -1.50000
O7    6    0.992558    0.275359    0.545622    11.00000    0.04459    0.03221 =
         0.01796   -0.00094    0.00605   -0.00732
H7WA  3    0.953546    0.235949    0.517491    11.00000   -1.50000
H7WB  3    0.973590    0.275813    0.585774    11.00000   -1.50000
HKLF    5


REM  c99_1_cr2_150k
REM R1 =  0.0496 for    6968 Fo > 4sig(Fo)  and  0.0793 for all   10290 data
REM    403 parameters refined using    157 restraints

END

WGHT      0.0561      0.0000

REM Instructions for potential hydrogen bonds
HTAB O3 N6
HTAB O3 N14_$3
HTAB O3 N15_$4
HTAB O4 O5
HTAB O4 O5_$5
HTAB C3 O7
HTAB C6 O7
HTAB C8 O2_$8
HTAB N1 O6_$9
HTAB N1 O6
HTAB N2 N16_$5
HTAB N3 N14_$4
HTAB N4 N12_$1
HTAB N4 N13_$1
HTAB O5 N16_$5
HTAB O5 N17_$1
HTAB O6 O7_$6
HTAB O6 N14_$4
HTAB O7 N17
HTAB O7 N15_$7

REM Highest difference peak  2.644,  deepest hole -1.052,  1-sigma level  0.238
Q1    1   0.7621  0.6133  0.2156  11.00000  0.05    2.64
Q2    1   0.5962  0.6178  0.1911  11.00000  0.05    2.61
Q3    1   0.6398  0.1737  0.2221  11.00000  0.05    1.69
Q4    1   0.6801  0.6070  0.5500  11.00000  0.05    1.24
Q5    1   0.7659  0.1768  0.2883  11.00000  0.05    1.06
Q6    1   0.6585  0.9023  0.4093  11.00000  0.05    1.01
Q7    1   0.6842  0.6949  0.2101  11.00000  0.05    1.01
Q8    1   0.6858  0.8808  0.3623  11.00000  0.05    0.98
Q9    1   0.4821  0.6211  0.1736  11.00000  0.05    0.96
Q10   1   1.0990  0.3406  0.6522  11.00000  0.05    0.90
Q11   1   0.4996  0.6607  0.1399  11.00000  0.05    0.88
Q12   1   0.9202  0.3958  0.4348  11.00000  0.05    0.85
Q13   1   0.3680  0.7781  0.0009  11.00000  0.05    0.85
Q14   1   0.6405  0.6143  0.1469  11.00000  0.05    0.84
Q15   1   0.5838  0.9340  0.3709  11.00000  0.05    0.83
Q16   1   0.4334  0.8232  0.2169  11.00000  0.05    0.81
Q17   1   0.6965  0.6049  0.4947  11.00000  0.05    0.81
Q18   1   0.9049  0.3776  0.4958  11.00000  0.05    0.80
Q19   1   0.8598  0.1802  0.2859  11.00000  0.05    0.79
Q20   1   0.5622  0.6102  0.1287  11.00000  0.05    0.78
;
_shelx_res_checksum   96108

_shelx_hkl_file
;
   0   0  -4 3624.49 58.7536   1
   2   0  -6 4822.27 98.3312  -2
   0   0  -6 4822.27 98.3312   1
   0   0  -8 504.798 55.9234   1
   0   0 -10 782.291 61.9622   1
   4   0 -12 1168.59 91.1510  -2
   0   0 -12 1168.59 91.1510   1
   5   0 -14 2915.76 116.788  -2
   0   0 -14 2915.76 116.788   1
   0   0 -16 91.5807 68.5772   1
   6   0 -18 375.492 107.092  -2
   0   0 -18 375.492 107.092   1
   7   0 -20 570.621 128.169  -2
   0   0 -20 570.621 128.169   1
   0   0 -22 420.062 100.112   1
   1   1  -3 1178.57 34.5628  -2
   0  -1  -3 1178.57 34.5628   1
   0  -1  -4 1396.82 32.5869   1
   0   1  -5 690.808 29.4393   1
   2   1  -6 2350.89 52.3306  -2
   0  -1  -6 2350.89 52.3306   1
   0   1  -7 3591.33 53.8769   1
   0  -1  -8 59.1095 32.3169   1
   3  -1  -9 877.897 50.8876  -2
   0   1  -9 877.897 50.8876   1
   0  -1 -10 22.5868 33.6387   1
   0   1 -11 93.7530 37.6816   1
   4   1 -12 740.318 60.0875  -2
   0  -1 -12 740.318 60.0875   1
   0  -1 -13 120.324 42.9720   1
   5  -1 -14 802.475 65.3551  -2
   0   1 -14 802.475 65.3551   1
   5   1 -15 1491.20 74.5709  -2
   0  -1 -15 1491.20 74.5709   1
   0   1 -16 708.740 57.2526   1
   6  -1 -17 1162.17 80.6609  -2
   0   1 -17 1162.17 80.6609   1
   6   1 -18 568.424 78.7790  -2
   0  -1 -18 568.424 78.7790   1
   0  -1 -19 367.081 61.2623   1
   7  -1 -20 806.581 93.7879  -2
   0   1 -20 806.581 93.7879   1
   0   1 -21 210.359 92.8469   1
   7   1 -21 527.124 129.710  -2
   0  -1 -21 527.124 129.710   1
   0   1 -22 98.0849 64.2890   1
   0  -2  -1 6422.69 29.6222   1
   0  -2  -2 129.117 10.7988   1
   1  -2  -3 3392.68 33.9991  -2
   0   2  -3 3392.68 33.9991   1
   0   2  -4 78.2879 17.5731   1
   0   2  -5 784.301 22.8242   1
  -2  -2   6 60.7561 27.0482  -2
   0   2   6 60.7561 27.0482   1
   0  -2  -7 139.387 32.6825   1
   0   2  -8 0.50840 31.7208   1
   3  -2  -9 3265.01 67.0708  -2
   0   2  -9 3265.01 67.0708   1
   0   2 -10 246.840 28.7568   1
   0  -2 -11 1659.62 76.3952   1
   4  -2 -11 2500.89 99.3459  -2
   0   2 -11 2500.89 99.3459   1
   4  -2 -12 107.168 55.5699  -2
   0   2 -12 107.168 55.5699   1
   0  -2 -13 860.600 52.3816   1
   5  -2 -14 454.895 64.6645  -2
   0   2 -14 454.895 64.6645   1
   5   2 -15 1609.50 77.1240  -2
   0  -2 -15 1609.50 77.1240   1
   0  -2 -16 0.14366 48.3626   1
   6   2 -17 152.145 70.7906  -2
   0  -2 -17 152.145 70.7906   1
   6   2 -18 164.947 73.4855  -2
   0  -2 -18 164.947 73.4855   1
   0  -2 -19 217.119 59.7448   1
   7  -2 -20-2.44735 82.9662  -2
   0   2 -20-2.44735 82.9662   1
   7   2 -21 686.944 91.5500  -2
   0  -2 -21 686.944 91.5500   1
   0   2 -22 82.4131 65.3294   1
   0  -3  -1 8.83694 11.2360   1
   0  -3  -2 1710.03 17.5354   1
   1   3  -3 554.265 20.3778  -2
   0  -3  -3 554.265 20.3778   1
   0   3   4 1890.13 29.1281   1
   0  -3  -5 853.426 25.9901   1
   2  -3  -6 3592.82 44.3024  -2
   0   3  -6 3592.82 44.3024   1
   0  -3  -7 197.354 23.9090   1
   0  -3  -8 1326.99 27.1252   1
  -3  -3   9 70.3513 26.8203  -2
   0   3   9 70.3513 26.8203   1
   0   3 -10 592.214 25.8409   1
   0  -3 -11 110.138 51.9804   1
   4  -3 -11 396.318 45.4091  -2
   0   3 -11 396.318 45.4091   1
  -4  -3  12 1703.41 50.6727  -2
   0   3  12 1703.41 50.6727   1
   0  -3 -13 24.7382 42.0948   1
   5  -3 -14 576.242 64.3616  -2
   0   3 -14 576.242 64.3616   1
   5   3 -15 406.736 67.9347  -2
   0  -3 -15 406.736 67.9347   1
   0  -3 -16 580.476 55.4993   1
   6   3 -17 472.867 75.1114  -2
   0  -3 -17 472.867 75.1114   1
   6   3 -18 757.375 83.2666  -2
   0  -3 -18 757.375 83.2666   1
   0   3 -19 179.214 59.8564   1
   7   3 -20 626.968 92.5565  -2
   0  -3 -20 626.968 92.5565   1
   0   3 -21 145.594 93.5151   1
   7   3 -21 436.385 126.372  -2
   0  -3 -21 436.385 126.372   1
   0  -3 -22 110.724 93.0409   1
   0   4   0 3816.47 62.7313  -2
   0  -4   0 3816.47 62.7313   1
   0  -4  -1 33.0325 12.4903   1
   0  -4  -2 1162.22 17.2404   1
   1   4  -3 35.5968 15.1113  -2
   0  -4  -3 35.5968 15.1113   1
   0  -4  -4 843.942 16.1562   1
   0   4   5 338.113 19.2233   1
   2   4  -6 1908.80 38.5936  -2
   0  -4  -6 1908.80 38.5936   1
   0   4   7 59.0192 19.7463   1
   0   4   8 159.874 19.6486   1
  -3  -4   9 827.178 32.7153  -2
   0   4   9 827.178 32.7153   1
   0   4  10 1070.33 34.2133   1
   0  -4 -11 264.387 55.6136   1
   4  -4 -11 421.507 45.1453  -2
   0   4 -11 421.507 45.1453   1
   4   4 -12 285.955 40.9865  -2
   0  -4 -12 285.955 40.9865   1
   0  -4 -13 129.935 44.2206   1
   5   4 -14 1220.40 73.0127  -2
   0  -4 -14 1220.40 73.0127   1
   5  -4 -15 144.280 65.1957  -2
   0   4 -15 144.280 65.1957   1
   0   4 -16 36.1879 50.7252   1
   6  -4 -17 174.750 74.4015  -2
   0   4 -17 174.750 74.4015   1
   6  -4 -18 345.374 79.4085  -2
   0   4 -18 345.374 79.4085   1
   0  -4 -19 31.2446 59.2750   1
   7  -4 -20 440.571 90.5400  -2
   0   4 -20 440.571 90.5400   1
   7  -4 -21 119.143 88.2276  -2
   0   4 -21 119.143 88.2276   1
   0  -5   1 288.872 16.6301   1
   0  -5  -2 157.081 13.5087   1
   1   5  -3 4650.03 41.4596  -2
   0  -5  -3 4650.03 41.4596   1
   0   5   4 812.794 16.5221   1
   0  -5  -5 4078.10 28.2493   1
  -2  -5   6 547.445 29.2893  -2
   0   5   6 547.445 29.2893   1
   0   5   7 3060.58 34.0721   1
   0   5   8 8.50264 17.5946   1
   3   5  -9 1824.33 43.4990  -2
   0  -5  -9 1824.33 43.4990   1
   0   5  10 10.5205 26.6930   1
   4   5 -11 1702.90 53.6422  -2
   0  -5 -11 1702.90 53.6422   1
   4   5 -12 231.144 44.7863  -2
   0  -5 -12 231.144 44.7863   1
   0  -5 -13 169.063 59.9325   1
   5   5 -14 556.818 95.9557  -2
   0  -5 -14 556.818 95.9557   1
   5  -5 -15 155.045 66.1620  -2
   0   5 -15 155.045 66.1620   1
   0  -5 -16 260.043 53.6048   1
   6   5 -17 1175.44 122.671  -2
   0  -5 -17 1175.44 122.671   1
   6   5 -18 426.947 117.753  -2
   0  -5 -18 426.947 117.753   1
   0  -5 -19 306.404 87.8089   1
   7   5 -20 366.379 129.369  -2
   0  -5 -20 366.379 129.369   1
   7   5 -21 261.312 129.624  -2
   0  -5 -21 261.312 129.624   1
   0   6   0 171.099 37.2637  -2
   0  -6   0 171.099 37.2637   1
   0  -6   1 658.805 20.8614   1
   0   6   2 294.859 15.6524   1
   1   6  -3 1445.44 29.3934  -2
   0  -6  -3 1445.44 29.3934   1
   0  -6  -4 28.4773 13.7189   1
   0  -6  -5 9.02605 12.1013   1
  -2   6   6 429.555 25.0819  -2
   0  -6   6 429.555 25.0819   1
   0  -6   7 870.737 22.9161   1
   0   6   8 222.663 21.3991   1
  -3  -6   9 1444.36 48.6364  -2
   0   6   9 1444.36 48.6364   1
   0  -6 -10 884.781 36.2815   1
   4   6 -11 1107.37 47.7796  -2
   0  -6 -11 1107.37 47.7796   1
  -4  -6  12 1523.88 56.1496  -2
   0   6  12 1523.88 56.1496   1
   0  -6 -13 633.493 40.2269   1
   5   6 -14 584.153 96.4393  -2
   0  -6 -14 584.153 96.4393   1
   5   6 -15 740.279 102.167  -2
   0  -6 -15 740.279 102.167   1
   0  -6 -16 12.0126 71.8618   1
   6   6 -17 60.9315 107.857  -2
   0  -6 -17 60.9315 107.857   1
   6   6 -18 335.585 117.410  -2
   0  -6 -18 335.585 117.410   1
   0  -6 -19 150.599 88.3472   1
   7   6 -20 174.889 126.969  -2
   0  -6 -20 174.889 126.969   1
   7   6 -21 416.718 133.776  -2
   0  -6 -21 416.718 133.776   1
   0  -7  -1 6.36356 16.0216   1
   0  -7  -2 574.154 21.0529   1
   1   7  -3 5.50314 18.7042  -2
   0  -7  -3 5.50314 18.7042   1
   0   7   4 2223.45 27.0539   1
   0  -7   5 46.6893 13.6364   1
   2   7  -6 4181.01 39.4854  -2
   0  -7  -6 4181.01 39.4854   1
   0   7   7 11.3580 17.5144   1
   0   7   8 2502.52 43.0743   1
   3   7  -9-3.22710 31.5145  -2
   0  -7  -9-3.22710 31.5145   1
   0   7  10 1071.12 36.9801   1
  -4  -7  11 70.5487 37.8656  -2
   0   7  11 70.5487 37.8656   1
  -4  -7  12 958.521 50.5250  -2
   0   7  12 958.521 50.5250   1
   0  -7 -13 88.2867 33.1849   1
   5   7 -14 331.071 96.4679  -2
   0  -7 -14 331.071 96.4679   1
   5   7 -15 360.869 96.5523  -2
   0  -7 -15 360.869 96.5523   1
   0  -7 -16 159.626 77.4693   1
   6   7 -17 4.91452 109.958  -2
   0  -7 -17 4.91452 109.958   1
   6   7 -18 513.746 124.278  -2
   0  -7 -18 513.746 124.278   1
   0  -7 -19 17.7669 89.6089   1
   7   7 -20 213.155 128.863  -2
   0  -7 -20 213.155 128.863   1
   0   8   0 2397.20 71.8430  -2
   0  -8   0 2397.20 71.8430   1
   0  -8  -1 467.286 21.2578   1
   0  -8   2 255.253 19.4509   1
  -1   8   3 841.901 32.6675  -2
   0  -8   3 841.901 32.6675   1
   0  -8  -4 132.156 15.7014   1
   0   8   5 28.8423 14.8980   1
   2   8  -6 430.603 24.5573  -2
   0  -8  -6 430.603 24.5573   1
   0  -8  -7 826.478 29.1378   1
   0  -8  -8 497.586 27.6102   1
  -3  -8   9 1027.63 43.5866  -2
   0   8   9 1027.63 43.5866   1
   0   8  10 864.859 34.6177   1
   4   8 -11 395.698 40.6564  -2
   0  -8 -11 395.698 40.6564   1
   4   8 -12 1139.92 52.9284  -2
   0  -8 -12 1139.92 52.9284   1
   0  -8 -13 385.255 71.9777   1
   5   8 -14 1047.61 103.374  -2
   0  -8 -14 1047.61 103.374   1
   5   8 -15 518.056 105.691  -2
   0  -8 -15 518.056 105.691   1
   0  -8 -16 71.0610 76.9679   1
   6   8 -17 107.725 113.220  -2
   0  -8 -17 107.725 113.220   1
   6   8 -18 399.673 122.461  -2
   0  -8 -18 399.673 122.461   1
   0  -8 -19 100.966 92.8885   1
   7   8 -20 442.268 135.241  -2
   0  -8 -20 442.268 135.241   1
   0  -9   1 212.400 20.5620   1
   0  -9   2 11.8721 18.9695   1
  -1   9   3 3439.94 53.6021  -2
   0  -9   3 3439.94 53.6021   1
   0  -9  -4-10.9104 18.7362   1
   0  -9  -5 2490.73 31.2905   1
  -2  -9   6 174.737 22.5891  -2
   0   9   6 174.737 22.5891   1
   0   9   7 2106.81 40.1388   1
   0  -9  -8 0.61618 21.6070   1
  -3  -9   9 1663.19 49.4524  -2
   0   9   9 1663.19 49.4524   1
   0   9  10 3.10206 23.7448   1
   4   9 -11 997.578 43.8508  -2
   0  -9 -11 997.578 43.8508   1
   4   9 -12-22.1409 85.3997  -2
   0  -9 -12-22.1409 85.3997   1
   0  -9 -13 141.972 68.4508   1
   5   9 -14 34.0267 96.5646  -2
   0  -9 -14 34.0267 96.5646   1
   5   9 -15 384.000 105.316  -2
   0  -9 -15 384.000 105.316   1
   0  -9 -16 100.816 81.9745   1
   6   9 -17 1035.29 132.184  -2
   0  -9 -17 1035.29 132.184   1
   6   9 -18 30.0729 120.838  -2
   0  -9 -18 30.0729 120.838   1
   0  -9 -19 261.128 96.8828   1
   0  10   0 1495.90 69.3152  -2
   0 -10   0 1495.90 69.3152   1
   0 -10  -1 433.511 24.1170   1
   0 -10   2 716.325 25.8857   1
   1  10  -3 336.573 30.8997  -2
   0 -10  -3 336.573 30.8997   1
   0 -10  -4 210.375 21.8291   1
   0 -10   5 8.70072 20.3272   1
   2  10  -6 792.765 38.7818  -2
   0 -10  -6 792.765 38.7818   1
   0 -10  -7 123.118 22.4385   1
   0 -10  -8 399.222 26.5290   1
  -3 -10   9 561.487 38.6985  -2
   0  10   9 561.487 38.6985   1
   0 -10 -10 569.514 69.8686   1
   4  10 -11 515.970 92.7445  -2
   0 -10 -11 515.970 92.7445   1
   4  10 -12 640.959 98.4368  -2
   0 -10 -12 640.959 98.4368   1
   0 -10 -13 230.569 72.1713   1
   5  10 -14 799.163 111.697  -2
   0 -10 -14 799.163 111.697   1
   5  10 -15 383.842 109.599  -2
   0 -10 -15 383.842 109.599   1
   0 -10 -16 84.4719 78.6467   1
   6  10 -17 222.661 120.609  -2
   0 -10 -17 222.661 120.609   1
   6  10 -18 245.698 126.794  -2
   0 -10 -18 245.698 126.794   1
   0 -10 -19 52.5829 92.9374   1
   0 -11  -1 0.06178 20.6857   1
   0 -11   2 460.181 25.2564   1
  -1  11   3 17.5505 28.9641  -2
   0 -11   3 17.5505 28.9641   1
   0 -11  -4 768.236 27.8478   1
   0 -11   5 69.8874 21.3709   1
   2  11  -6 2246.13 44.4768  -2
   0 -11  -6 2246.13 44.4768   1
   0 -11   7 43.6958 35.8092   1
   0 -11  -8 709.610 72.7937   1
   3  11  -9 61.4540 86.1319  -2
   0 -11  -9 61.4540 86.1319   1
   0 -11 -10 192.377 66.6566   1
   4  11 -11 14.8330 88.8902  -2
   0 -11 -11 14.8330 88.8902   1
   4  11 -12 531.293 102.353  -2
   0 -11 -12 531.293 102.353   1
   0 -11 -13 18.9047 74.3169   1
   5  11 -14 226.628 108.299  -2
   0 -11 -14 226.628 108.299   1
   5  11 -15 155.633 112.954  -2
   0 -11 -15 155.633 112.954   1
   0 -11 -16 441.215 94.0772   1
   6  11 -17 121.549 120.549  -2
   0 -11 -17 121.549 120.549   1
   6  11 -18 411.403 133.088  -2
   0 -11 -18 411.403 133.088   1
   0  12   0 41.1184 41.0007  -2
   0 -12   0 41.1184 41.0007   1
   0 -12   1 1478.76 34.9994   1
   0 -12  -2-4.05725 22.4382   1
   1  12  -3 926.476 41.4401  -2
   0 -12  -3 926.476 41.4401   1
   0 -12   4 40.1896 22.1461   1
   0 -12  -5 57.9644 24.1923   1
  -2  12   5 985.022 78.0448  -2
   0 -12   5 985.022 78.0448   1
   2  12  -6 364.430 31.2621  -2
   0 -12  -6 364.430 31.2621   1
   0 -12  -7 64.7020 39.7154   1
   0 -12  -8 238.075 69.3855   1
  -3  12   8 305.725 78.2092  -2
   0 -12   8 305.725 78.2092   1
   3  12  -9 1071.70 108.787  -2
   0 -12  -9 1071.70 108.787   1
   0 -12 -10 475.885 77.8591   1
   4  12 -11 540.078 104.633  -2
   0 -12 -11 540.078 104.633   1
   4  12 -12 52.2109 99.0108  -2
   0 -12 -12 52.2109 99.0108   1
   0 -12 -13 368.633 83.8405   1
   5  12 -14 241.336 111.496  -2
   0 -12 -14 241.336 111.496   1
   5  12 -15 513.576 121.030  -2
   0 -12 -15 513.576 121.030   1
   0 -12 -16-57.0421 87.3603   1
   6  12 -17 65.2926 124.151  -2
   0 -12 -17 65.2926 124.151   1
   0 -13  -1 189.706 23.6628   1
   0 -13  -2 18.0809 23.0525   1
  -1  13   3 820.157 41.9007  -2
   0 -13   3 820.157 41.9007   1
   0 -13  -4 99.2144 35.9906   1
   0 -13  -5 482.947 43.4449   1
   2  13  -6 308.054 59.0923  -2
   0 -13  -6 308.054 59.0923   1
   0 -13   7 543.944 48.9008   1
   0 -13  -8-3.46988 66.8858   1
  -3  13   8 110.031 78.0536  -2
   0 -13   8 110.031 78.0536   1
  -3  13   9 255.647 65.2755  -2
   0 -13   9 255.647 65.2755   1
   0 -13  10 6.35389 46.2162   1
  -4  13  11 605.416 74.1629  -2
   0 -13  11 605.416 74.1629   1
   4  13 -12 236.446 108.181  -2
   0 -13 -12 236.446 108.181   1
   0 -13 -13 187.713 85.2440   1
   5  13 -14 187.429 119.859  -2
   0 -13 -14 187.429 119.859   1
   5  13 -15 352.663 126.162  -2
   0 -13 -15 352.663 126.162   1
   0 -13 -16 274.972 94.6739   1
   0  14   0 3899.94 93.6190  -2
   0 -14   0 3899.94 93.6190   1
   0 -14   1 38.2154 29.6460   1
   0 -14   2 1121.49 42.6435   1
  -1  14   3 8.13564 42.1321  -2
   0 -14   3 8.13564 42.1321   1
   0 -14   4 266.186 41.3987   1
   0 -14  -5 29.1214 39.7390   1
  -2  14   6 614.760 67.4695  -2
   0 -14   6 614.760 67.4695   1
   0 -14  -7 52.9739 44.3419   1
   0 -14  -8 24.6226 72.8070   1
  -3  14   8 713.800 91.8834  -2
   0 -14   8 713.800 91.8834   1
   3  14  -9 50.8166 69.9784  -2
   0 -14  -9 50.8166 69.9784   1
   0 -14 -10 260.019 55.0114   1
   4  14 -11 121.124 73.5328  -2
   0 -14 -11 121.124 73.5328   1
  -4  14  12 364.682 78.9096  -2
   0 -14  12 364.682 78.9096   1
   0 -14  13 22.2132 56.4799   1
   5  14 -14 762.350 88.2472  -2
   0 -14 -14 762.350 88.2472   1
   0 -15  -1 14.9956 43.9944   1
   0 -15   2 181.732 48.9973   1
   1  15  -3 88.1268 90.9795  -2
   0 -15  -3 88.1268 90.9795   1
   0 -15  -4 316.758 73.5064   1
   0 -15  -5 268.085 46.4469   1
  -2  15   6 587.834 70.8340  -2
   0 -15   6 587.834 70.8340   1
   0 -15  -7 251.327 49.4901   1
   0 -15  -8 243.374 81.5385   1
  -3  15   8 485.970 92.6378  -2
   0 -15   8 485.970 92.6378   1
  -3  15   9 55.0609 70.3597  -2
   0 -15   9 55.0609 70.3597   1
   0 -15 -10 18.0061 52.5548   1
   4  15 -11 88.8924 76.7077  -2
   0 -15 -11 88.8924 76.7077   1
  -4  15  12 285.850 81.7461  -2
   0 -15  12 285.850 81.7461   1
   0 -15 -13 43.3256 57.6704   1
   0  16   0-39.5177 91.1793  -2
   0 -16   0-39.5177 91.1793   1
   0 -16  -1 965.635 61.8669   1
   0 -16  -2-25.0343 49.0146   1
   1  16  -3 593.133 80.6317  -2
   0 -16  -3 593.133 80.6317   1
   0 -16  -4 21.7750 73.8730   1
   0 -16  -5 168.284 80.7702   1
   2  16  -6 32.2610 108.480  -2
   0 -16  -6 32.2610 108.480   1
   0 -16  -7 60.8067 82.1500   1
   0 -16  -8 58.0192 83.2770   1
   3  16  -9 651.476 128.664  -2
   0 -16  -9 651.476 128.664   1
   0 -16 -10-45.3932 83.0761   1
   4  16 -11 401.792 129.704  -2
   0 -16 -11 401.792 129.704   1
   0 -17   1 17.7361 52.6219   1
   0 -17  -2 41.8782 54.9747   1
   1  17  -3 207.592 78.8197  -2
   0 -17  -3 207.592 78.8197   1
   0 -17   4 218.106 59.0575   1
   0 -17  -5 166.063 58.7299   1
   2  17  -6 341.508 124.563  -2
   0 -17  -6 341.508 124.563   1
   0 -17  -7 131.508 86.6647   1
   0 -17  -8 208.458 93.9366   1
   0  18   0 1621.97 154.466  -2
   0 -18   0 1621.97 154.466   1
   0 -18   1-2.41051 56.7570   1
   0 -18   2 357.418 82.2635   1
  -1  18   3-24.0629 113.205  -2
   0 -18   3-24.0629 113.205   1
   1   0 -22 29.8831 88.0018   1
   6   0 -20 437.619 125.015  -2
   1   0 -20 437.619 125.015   1
   5   0 -18 495.034 105.809  -2
   1   0 -18 495.034 105.809   1
   1   0 -16 93.3484 66.2767   1
   4   0 -14 194.039 87.2239  -2
   1   0 -14 194.039 87.2239   1
   3   0 -12 2457.53 102.357  -2
   1   0 -12 2457.53 102.357   1
   1   0 -10 2808.93 82.5972   1
   1   0  -8 2667.67 75.0044   1
   1   0  -6 9617.56 118.209  -2
   1   0  -6 9617.56 118.209   1
   1   0  -4 3390.21 55.2262   1
  -1   0  -2 2760.21 37.9228   1
  -1   0  -4 7267.16 77.3339   1
   3   0  -6 7496.20 109.661  -2
  -1   0  -6 7496.20 109.661   1
  -1   0  -8 5163.63 95.1028   1
  -1   0 -10 732.370 57.3017   1
   5   0 -12 716.883 83.3443  -2
  -1   0 -12 716.883 83.3443   1
   6   0 -14 838.006 91.8657  -2
  -1   0 -14 838.006 91.8657   1
  -1   0 -16 123.228 70.1011   1
   7   0 -18 682.826 111.875  -2
  -1   0 -18 682.826 111.875   1
   8   0 -20 81.5182 116.281  -2
  -1   0 -20 81.5182 116.281   1
  -1   0 -22-21.8880 92.5922   1
   1  -1 -22 262.666 67.9327   1
   6  -1 -21 322.238 87.2883  -2
   1   1 -21 322.238 87.2883   1
   6   1 -20 98.9794 81.3616  -2
   1  -1 -20 98.9794 81.3616   1
   1  -1 -19 77.4263 56.7245   1
   5  -1 -18 1041.58 81.9403  -2
   1   1 -18 1041.58 81.9403   1
   5  -1 -17 679.476 77.5026  -2
   1   1 -17 679.476 77.5026   1
   1  -1 -16 324.181 52.7559   1
   4   1 -15 952.752 70.8679  -2
   1  -1 -15 952.752 70.8679   1
   4  -1 -14 1046.33 68.1109  -2
   1   1 -14 1046.33 68.1109   1
   1  -1 -13 907.988 52.3922   1
   3  -1 -12 2368.36 73.6803  -2
   1   1 -12 2368.36 73.6803   1
  -1   1  11 1732.05 42.1606   1
   1  -1 -10 1030.26 34.6695   1
   2   1  -9 1983.42 47.0262  -2
   1  -1  -9 1983.42 47.0262   1
   1  -1  -8 442.419 28.6463   1
  -1   1   7 8.07249 21.8976   1
   1   1  -6 20.0263 37.3440  -2
   1  -1  -6 20.0263 37.3440   1
   1   1  -5 254.886 27.7731   1
   1  -1  -4-26.0434 23.4047   1
   0   1  -3 1263.26 26.3450  -2
   1  -1  -3 1263.26 26.3450   1
  -1  -1  -2 9.02844 20.6007   1
   2  -1  -3 61.4837 28.2465  -2
  -1   1  -3 61.4837 28.2465   1
  -1   1  -4 870.628 29.2215   1
  -1  -1  -5 1551.41 35.8759   1
   3  -1  -6 1090.82 46.1461  -2
  -1   1  -6 1090.82 46.1461   1
  -1   1  -7 931.217 38.1689   1
  -1  -1  -8 742.622 40.0150   1
   4  -1  -9 2026.81 62.2013  -2
  -1   1  -9 2026.81 62.2013   1
  -1   1 -10 1490.36 38.5841   1
  -1   1 -11 1880.94 55.1819   1
   5   1 -12 764.328 60.5019  -2
  -1  -1 -12 764.328 60.5019   1
  -1  -1 -13 782.953 50.1048   1
   6   1 -14 497.232 62.7263  -2
  -1  -1 -14 497.232 62.7263   1
   6  -1 -15 720.460 70.6779  -2
  -1   1 -15 720.460 70.6779   1
  -1  -1 -16-11.7878 47.2354   1
   7   1 -17 148.539 69.8012  -2
  -1  -1 -17 148.539 69.8012   1
   7  -1 -18 377.533 76.6970  -2
  -1   1 -18 377.533 76.6970   1
  -1   1 -19 248.066 60.8824   1
   8   1 -20 475.357 88.8788  -2
  -1  -1 -20 475.357 88.8788   1
  -1   1 -21 159.270 91.8064   1
   8   1 -21 351.798 127.653  -2
  -1  -1 -21 351.798 127.653   1
  -1  -1 -22 340.963 100.025   1
   1   2 -22 46.3514 63.4427   1
   1   2 -21 404.392 97.4159   1
   6   2 -21 564.350 128.500  -2
   1  -2 -21 564.350 128.500   1
   6  -2 -20 172.886 84.0388  -2
   1   2 -20 172.886 84.0388   1
   1  -2 -19 493.640 62.8350   1
   5  -2 -18 77.5375 73.1453  -2
   1   2 -18 77.5375 73.1453   1
   5   2 -17 971.747 80.8973  -2
   1  -2 -17 971.747 80.8973   1
   1   2 -16 90.8418 49.7076   1
   4  -2 -15 928.342 71.7619  -2
   1   2 -15 928.342 71.7619   1
   4  -2 -14 379.344 62.9932  -2
   1   2 -14 379.344 62.9932   1
   1   2 -13 13.9380 41.6247   1
   3  -2 -12 33.1522 54.3367  -2
   1   2 -12 33.1522 54.3367   1
   1   2 -11 710.398 39.9577   1
   3   2 -11 2944.91 101.170  -2
   1  -2 -11 2944.91 101.170   1
   1  -2 -10-4.40576 24.0954   1
  -2  -2   9 1953.38 44.7085  -2
  -1   2   9 1953.38 44.7085   1
   1  -2  -8 420.658 25.9765   1
  -1   2   7 5250.32 47.8737   1
   1  -2  -6 16.2176 27.3438  -2
   1   2  -6 16.2176 27.3438   1
  -1   2   5 594.028 22.0042   1
  -1   2   4 388.392 17.4020   1
   0   2  -3 3229.35 35.8703  -2
   1  -2  -3 3229.35 35.8703   1
   1  -2  -2 221.170 18.0360   1
   1  -2  -1 186.091 17.0837   1
  -1   2   0 1146.91 41.9407  -2
   1  -2   0 1146.91 41.9407   1
   1  -2   1 1164.65 20.5406   1
  -1  -2  -2 19.6598 23.1880   1
   2   2  -3 6163.92 78.4003  -2
  -1  -2  -3 6163.92 78.4003   1
  -1  -2  -4 52.4548 18.7446   1
  -1   2  -5 2615.59 33.7429   1
   3   2  -6 23.7985 28.2297  -2
  -1  -2  -6 23.7985 28.2297   1
  -1  -2  -7 3262.98 43.1991   1
  -1  -2  -8 55.5004 25.3075   1
  -4  -2   9 1381.96 44.9654  -2
   1   2   9 1381.96 44.9654   1
  -1  -2 -10 263.482 28.6655   1
  -1  -2 -11 28.0971 50.1917   1
   5  -2 -11 929.706 84.5550  -2
  -1   2 -11 929.706 84.5550   1
   5   2 -12 282.405 57.2850  -2
  -1  -2 -12 282.405 57.2850   1
  -1  -2 -13 647.239 49.5026   1
   6   2 -14 368.480 63.2242  -2
  -1  -2 -14 368.480 63.2242   1
   6   2 -15 810.744 70.8595  -2
  -1  -2 -15 810.744 70.8595   1
  -1   2 -16 396.373 53.8627   1
   7  -2 -17 1395.70 86.6352  -2
  -1   2 -17 1395.70 86.6352   1
   7   2 -18 141.046 73.3414  -2
  -1  -2 -18 141.046 73.3414   1
  -1  -2 -19 116.977 58.3112   1
   8  -2 -20 49.8981 83.4996  -2
  -1   2 -20 49.8981 83.4996   1
   8   2 -21 138.229 88.5174  -2
  -1  -2 -21 138.229 88.5174   1
  -1  -2 -22 66.5267 91.6651   1
   1   3 -22 331.615 70.9173   1
   6   3 -21 167.572 88.8668  -2
   1  -3 -21 167.572 88.8668   1
   6  -3 -20 169.593 84.9886  -2
   1   3 -20 169.593 84.9886   1
   1  -3 -19 27.7786 57.6585   1
   5   3 -18 585.103 79.3773  -2
   1  -3 -18 585.103 79.3773   1
   5  -3 -17 330.722 72.4816  -2
   1   3 -17 330.722 72.4816   1
   1  -3 -16 334.970 51.9961   1
   4   3 -15 654.324 70.0013  -2
   1  -3 -15 654.324 70.0013   1
   4   3 -14 1088.74 70.9846  -2
   1  -3 -14 1088.74 70.9846   1
   1  -3 -13 505.729 48.4235   1
   3  -3 -12 1054.65 63.2523  -2
   1   3 -12 1054.65 63.2523   1
   1   3 -11 730.730 63.5612   1
   3   3 -11 884.345 48.2809  -2
   1  -3 -11 884.345 48.2809   1
   1  -3 -10 999.937 29.2876   1
   2  -3  -9 579.936 35.9241  -2
   1   3  -9 579.936 35.9241   1
  -1   3   8 59.1434 23.9741   1
   1  -3  -7 157.574 22.4732   1
  -1  -3   6 1036.66 34.6303  -2
  -1   3   6 1036.66 34.6303   1
  -1   3   5 38.8831 15.7926   1
   1  -3  -4 597.105 19.8810   1
   0   3   3 623.646 22.2195  -2
  -1  -3   3 623.646 22.2195   1
   1  -3  -2 1505.34 21.3663   1
  -1   3   1 450.813 20.1760   1
  -1   3   0 7164.46 85.8406  -2
   1  -3   0 7164.46 85.8406   1
   1  -3   1 341.387 19.6483   1
   1   3   2 356.245 20.1774   1
  -2  -3   3 282.046 17.1445  -2
   1   3   3 282.046 17.1445   1
   1   3   4 104.549 14.2103   1
  -1  -3  -5 875.440 21.1633   1
  -3  -3   6 1602.35 34.8109  -2
   1   3   6 1602.35 34.8109   1
  -1   3  -7 1257.52 32.3486   1
   1   3   8 2301.30 40.1969   1
   4  -3  -9 1160.96 45.1313  -2
  -1   3  -9 1160.96 45.1313   1
  -1   3 -10 1488.06 40.7043   1
  -1  -3 -11 669.013 45.7938   1
  -5  -3  12 838.380 46.0464  -2
   1   3  12 838.380 46.0464   1
  -1   3 -13 98.9283 42.0549   1
   6   3 -14 2077.97 79.7623  -2
  -1  -3 -14 2077.97 79.7623   1
   6  -3 -15 197.154 64.7085  -2
  -1   3 -15 197.154 64.7085   1
  -1   3 -16 28.2631 49.3926   1
   7   3 -17 147.009 72.2657  -2
  -1  -3 -17 147.009 72.2657   1
   7   3 -18 441.039 79.4285  -2
  -1  -3 -18 441.039 79.4285   1
  -1  -3 -19 123.137 60.3153   1
   8   3 -20 613.333 91.9286  -2
  -1  -3 -20 613.333 91.9286   1
   8  -3 -21 245.337 89.6386  -2
  -1   3 -21 245.337 89.6386   1
   1  -4 -22 240.115 97.8368   1
   6   4 -21 427.153 92.8423  -2
   1  -4 -21 427.153 92.8423   1
   6  -4 -20 711.058 95.8437  -2
   1   4 -20 711.058 95.8437   1
   1   4 -19 397.395 63.8568   1
   5   4 -18 568.580 79.9327  -2
   1  -4 -18 568.580 79.9327   1
   5  -4 -17 446.600 76.6948  -2
   1   4 -17 446.600 76.6948   1
   1   4 -16 196.219 51.0343   1
   4  -4 -15 275.354 67.1019  -2
   1   4 -15 275.354 67.1019   1
   4  -4 -14 539.283 66.4867  -2
   1   4 -14 539.283 66.4867   1
   1   4 -13 118.254 43.2301   1
   3  -4 -12 904.204 45.6244  -2
   1   4 -12 904.204 45.6244   1
   3  -4 -11 275.572 38.3633  -2
   1   4 -11 275.572 38.3633   1
  -1   4  10 819.097 32.1936   1
  -2  -4   9 56.4796 25.3860  -2
  -1   4   9 56.4796 25.3860   1
   1   4  -8 1434.42 32.1241   1
   1  -4  -7 92.1489 19.2246   1
  -1   4   6 2551.38 36.7675  -2
  -1  -4   6 2551.38 36.7675   1
  -1   4   5 380.512 17.9633   1
  -1  -4   4 123.074 15.0423   1
   0   4  -3 28.5865 20.1057  -2
   1  -4  -3 28.5865 20.1057   1
  -1   4   2 267.917 16.6313   1
   1  -4  -1 290.014 19.1878   1
  -1   4   0 9543.97 107.256  -2
   1  -4   0 9543.97 107.256   1
  -1  -4  -1 1339.30 16.0529   1
   1   4   2 1858.60 30.0100   1
  -2  -4   3 337.097 16.1754  -2
   1   4   3 337.097 16.1754   1
   1   4   4 6585.83 36.6851   1
   1   4   5 19.4579 14.9846   1
   3   4  -6 3116.71 39.7849  -2
  -1  -4  -6 3116.71 39.7849   1
  -1  -4  -7 17.1719 17.6239   1
   1   4   8 770.562 24.8876   1
   4   4  -9 432.175 31.5764  -2
  -1  -4  -9 432.175 31.5764   1
   1   4  10 85.8379 25.0387   1
   1   4  11 263.995 31.0964   1
   5  -4 -11 399.231 81.6254  -2
  -1   4 -11 399.231 81.6254   1
  -5  -4  12 1736.47 50.5878  -2
   1   4  12 1736.47 50.5878   1
  -1  -4 -13 306.751 46.4210   1
   6  -4 -14 904.181 71.3113  -2
  -1   4 -14 904.181 71.3113   1
   6   4 -15 599.227 69.7824  -2
  -1  -4 -15 599.227 69.7824   1
  -1   4 -16 296.566 54.0934   1
   7  -4 -17 512.279 80.0151  -2
  -1   4 -17 512.279 80.0151   1
   7  -4 -18 709.376 84.7737  -2
  -1   4 -18 709.376 84.7737   1
  -1  -4 -19 58.8899 59.5359   1
   8   4 -20 158.430 120.151  -2
  -1  -4 -20 158.430 120.151   1
   8   4 -21 183.191 125.743  -2
  -1  -4 -21 183.191 125.743   1
   6   5 -21 326.361 129.857  -2
   1  -5 -21 326.361 129.857   1
   6   5 -20 0.70079 85.8423  -2
   1  -5 -20 0.70079 85.8423   1
   1  -5 -19 39.1582 59.1378   1
   5   5 -18 243.286 79.2126  -2
   1  -5 -18 243.286 79.2126   1
   5  -5 -17 431.891 77.1166  -2
   1   5 -17 431.891 77.1166   1
   1  -5 -16 204.749 52.8335   1
   4   5 -15 1446.84 78.8747  -2
   1  -5 -15 1446.84 78.8747   1
   4   5 -14 100.755 63.8140  -2
   1  -5 -14 100.755 63.8140   1
   1  -5 -13 856.519 52.2880   1
   3   5 -12 312.040 41.7837  -2
   1  -5 -12 312.040 41.7837   1
   3   5 -11 672.899 40.9913  -2
   1  -5 -11 672.899 40.9913   1
  -1   5  10 220.901 30.3167   1
  -2  -5   9 2422.19 59.4381  -2
  -1   5   9 2422.19 59.4381   1
  -1   5   8 996.518 25.5420   1
  -1  -5   7 76.4343 15.5428   1
  -1   5   6 300.797 24.2868  -2
  -1  -5   6 300.797 24.2868   1
  -1   5   5 1100.20 21.9483   1
  -1   5   4 315.931 16.5006   1
   0   5  -3 4428.48 47.7030  -2
   1  -5  -3 4428.48 47.7030   1
  -1   5   2 139.766 16.4693   1
  -1   5   1 4396.50 41.7477   1
   1   5   0 1227.23 32.2968  -2
  -1  -5   0 1227.23 32.2968   1
   1  -5   1 3182.06 26.0666   1
   1  -5   2 18.7590 10.5425   1
  -2  -5   3 619.695 14.0429  -2
   1   5   3 619.695 14.0429   1
  -1  -5  -4 389.407 14.6501   1
   1   5   5 146.814 14.9894   1
  -3  -5   6 485.197 26.2357  -2
   1   5   6 485.197 26.2357   1
  -1  -5  -7 574.228 21.9472   1
   1   5   8 657.898 24.3220   1
   4   5  -9 1416.36 39.1424  -2
  -1  -5  -9 1416.36 39.1424   1
   1   5  10 321.948 29.9949   1
  -1  -5 -11 1084.98 69.4786   1
  -5  -5  11 1756.44 64.9176  -2
   1   5  11 1756.44 64.9176   1
   5   5 -12 100.373 41.8764  -2
  -1  -5 -12 100.373 41.8764   1
  -1  -5 -13 898.837 43.8674   1
   6   5 -14 143.688 90.8975  -2
  -1  -5 -14 143.688 90.8975   1
   6   5 -15 818.126 101.285  -2
  -1  -5 -15 818.126 101.285   1
  -1  -5 -16-11.6251 71.7346   1
   7   5 -17 76.7132 101.053  -2
  -1  -5 -17 76.7132 101.053   1
   7   5 -18 28.9954 113.505  -2
  -1  -5 -18 28.9954 113.505   1
  -1  -5 -19 184.785 86.8403   1
   8   5 -20 151.664 120.421  -2
  -1  -5 -20 151.664 120.421   1
   8   5 -21 626.887 131.721  -2
  -1  -5 -21 626.887 131.721   1
   1  -6 -21 259.038 95.1853   1
   6   6 -20 583.530 134.684  -2
   1  -6 -20 583.530 134.684   1
   1  -6 -19 457.638 96.0425   1
   5   6 -18 551.316 120.106  -2
   1  -6 -18 551.316 120.106   1
   5   6 -17 946.641 121.683  -2
   1  -6 -17 946.641 121.683   1
   1  -6 -16 292.929 75.9948   1
   4   6 -15 1070.27 109.890  -2
   1  -6 -15 1070.27 109.890   1
   4   6 -14 166.047 89.1183  -2
   1  -6 -14 166.047 89.1183   1
   1  -6 -13 88.6041 63.8680   1
  -3  -6  12 186.032 44.6257  -2
  -1   6  12 186.032 44.6257   1
  -3  -6  11 992.335 48.8380  -2
  -1   6  11 992.335 48.8380   1
   1  -6 -10 184.701 30.7193   1
   2   6  -9 420.362 39.5119  -2
   1  -6  -9 420.362 39.5119   1
  -1   6   8 211.658 22.8047   1
  -1   6   7 1705.44 25.0427   1
   1   6  -6 680.525 24.4462  -2
   1  -6  -6 680.525 24.4462   1
  -1   6   5 319.692 15.8418   1
   1  -6  -4 218.142 17.8422   1
   0   6  -3 1346.66 33.5095  -2
   1  -6  -3 1346.66 33.5095   1
  -1   6   2 4.71777 15.8895   1
   1  -6  -1 523.692 34.8339   1
  -1   6   0 373.986 27.3062  -2
   1  -6   0 373.986 27.3062   1
   1  -6   1 1198.28 20.9403   1
  -1  -6  -2 747.099 17.2853   1
   2   6  -3 2454.23 33.4003  -2
  -1  -6  -3 2454.23 33.4003   1
   1   6   4 130.129 9.59530   1
   1   6   5 1175.37 20.9215   1
   3   6  -6 609.818 26.2125  -2
  -1  -6  -6 609.818 26.2125   1
   1   6   7 654.339 21.8982   1
   1   6   8 106.594 19.2789   1
   4   6  -9 381.521 36.1577  -2
  -1  -6  -9 381.521 36.1577   1
  -1  -6 -10 125.774 25.6900   1
   5   6 -11 945.420 45.5540  -2
  -1  -6 -11 945.420 45.5540   1
  -5  -6  12 707.905 47.5944  -2
   1   6  12 707.905 47.5944   1
  -1  -6 -13 766.188 42.0569   1
   6   6 -14 510.138 96.4462  -2
  -1  -6 -14 510.138 96.4462   1
   6   6 -15 872.425 103.337  -2
  -1  -6 -15 872.425 103.337   1
  -1  -6 -16 322.681 79.6344   1
   7   6 -17 847.534 118.976  -2
  -1  -6 -17 847.534 118.976   1
   7   6 -18 514.121 118.233  -2
  -1  -6 -18 514.121 118.233   1
  -1  -6 -19 227.166 89.8848   1
   8   6 -20 291.053 127.999  -2
  -1  -6 -20 291.053 127.999   1
   8   6 -21 228.377 127.352  -2
  -1  -6 -21 228.377 127.352   1
   6   7 -20 167.432 135.178  -2
   1  -7 -20 167.432 135.178   1
   1  -7 -19-58.2662 88.6908   1
   5   7 -18 458.223 122.184  -2
   1  -7 -18 458.223 122.184   1
   5   7 -17 7.86843 105.392  -2
   1  -7 -17 7.86843 105.392   1
   1  -7 -16 374.764 79.5928   1
   4   7 -15 3.58381 98.0281  -2
   1  -7 -15 3.58381 98.0281   1
   4   7 -14 1835.36 119.910  -2
   1  -7 -14 1835.36 119.910   1
   1  -7 -13 8.57404 62.6956   1
   3   7 -12 875.231 52.5196  -2
   1  -7 -12 875.231 52.5196   1
   3   7 -11 116.094 39.8624  -2
   1  -7 -11 116.094 39.8624   1
   1  -7 -10 164.385 30.4257   1
  -2  -7   9 5.26535 34.5986  -2
  -1   7   9 5.26535 34.5986   1
   1  -7  -8 26.2334 20.2445   1
   1  -7  -7 330.997 19.1362   1
   1   7  -6 1034.94 28.2199  -2
   1  -7  -6 1034.94 28.2199   1
   1  -7  -5 7.31316 15.1626   1
  -1   7   4 1561.79 27.8730   1
   0   7  -3 10.0526 18.8174  -2
   1  -7  -3 10.0526 18.8174   1
   1  -7  -2 5613.93 44.5626   1
   1  -7  -1 11.4526 18.9541   1
  -1   7   0 9620.81 83.4453  -2
   1  -7   0 9620.81 83.4453   1
   1  -7   1 214.793 16.6449   1
  -1  -7  -2 1800.01 24.8211   1
   2   7  -3 10.4606 16.2532  -2
  -1  -7  -3 10.4606 16.2532   1
   1   7   4 297.665 11.6710   1
   1   7   5-0.54256 12.0659   1
  -3  -7   6 2422.79 37.9871  -2
   1   7   6 2422.79 37.9871   1
   1   7   7 10.4316 15.4029   1
  -1  -7  -8 776.831 58.4616   1
  -4  -7   8 1086.60 38.7744  -2
   1   7   8 1086.60 38.7744   1
   4   7  -9 100.374 31.6990  -2
  -1  -7  -9 100.374 31.6990   1
  -1  -7 -10 719.761 32.3460   1
   5   7 -11-11.2182 35.8000  -2
  -1  -7 -11-11.2182 35.8000   1
   5   7 -12 1309.92 53.3662  -2
  -1  -7 -12 1309.92 53.3662   1
   1   7  13 33.4608 30.4742   1
   6   7 -14 993.260 100.844  -2
  -1  -7 -14 993.260 100.844   1
   6   7 -15 21.3483 93.6142  -2
  -1  -7 -15 21.3483 93.6142   1
  -1  -7 -16 17.5338 74.2385   1
   7   7 -17-51.0481 111.985  -2
  -1  -7 -17-51.0481 111.985   1
   7   7 -18 257.319 117.448  -2
  -1  -7 -18 257.319 117.448   1
  -1  -7 -19 40.6097 89.3408   1
   8   7 -20 1069.02 146.282  -2
  -1  -7 -20 1069.02 146.282   1
   6   8 -20 916.928 145.818  -2
   1  -8 -20 916.928 145.818   1
   1  -8 -19 521.106 100.300   1
   5   8 -18 850.129 128.923  -2
   1  -8 -18 850.129 128.923   1
   5   8 -17 834.262 127.615  -2
   1  -8 -17 834.262 127.615   1
   1  -8 -16 812.373 92.7350   1
   4   8 -15 693.046 108.419  -2
   1  -8 -15 693.046 108.419   1
   4   8 -14 449.102 100.160  -2
   1  -8 -14 449.102 100.160   1
   1  -8 -13 145.980 67.0313   1
  -3  -8  12 212.882 43.4483  -2
  -1   8  12 212.882 43.4483   1
   3   8 -11 154.788 39.6077  -2
   1  -8 -11 154.788 39.6077   1
   1  -8 -10 30.2364 26.1421   1
   2   8  -9 552.147 41.5746  -2
   1  -8  -9 552.147 41.5746   1
  -1   8   8 276.830 22.5057   1
   1  -8  -7 731.705 25.0704   1
  -1  -8   6 1402.82 37.3374  -2
  -1   8   6 1402.82 37.3374   1
   1  -8  -5 796.432 21.9725   1
   1  -8  -4 356.547 20.2156   1
   0   8  -3 832.114 32.3766  -2
   1  -8  -3 832.114 32.3766   1
  -1  -8   2 17.5158 18.3021   1
   1  -8  -1 26.9723 20.4589   1
  -1   8   0 115.417 27.2039  -2
   1  -8   0 115.417 27.2039   1
  -1  -8  -1 197.211 17.7372   1
   1  -8   2 306.887 17.8031   1
   2   8  -3 934.205 28.2650  -2
  -1  -8  -3 934.205 28.2650   1
   1  -8   4 676.300 19.1795   1
   1   8   5 659.012 19.6697   1
   3   8  -6 409.527 24.3102  -2
  -1  -8  -6 409.527 24.3102   1
   1   8   7 583.151 22.3672   1
  -1  -8  -8 222.862 20.6026   1
   4   8  -9 293.538 31.2757  -2
  -1  -8  -9 293.538 31.2757   1
  -1  -8 -10 213.628 25.1252   1
   5   8 -11 233.391 36.1438  -2
  -1  -8 -11 233.391 36.1438   1
  -5  -8  12 705.464 45.0715  -2
   1   8  12 705.464 45.0715   1
  -1  -8 -13 235.926 68.0601   1
   6   8 -14 1067.60 108.414  -2
  -1  -8 -14 1067.60 108.414   1
   6   8 -15 506.132 104.286  -2
  -1  -8 -15 506.132 104.286   1
  -1  -8 -16 669.471 91.5191   1
   7   8 -17 687.031 125.234  -2
  -1  -8 -17 687.031 125.234   1
   7   8 -18 541.101 123.430  -2
  -1  -8 -18 541.101 123.430   1
  -1  -8 -19 262.825 91.6330   1
   8   8 -20 235.083 132.259  -2
  -1  -8 -20 235.083 132.259   1
   1  -9 -19 31.4470 88.1995   1
   5   9 -18 85.2834 122.481  -2
   1  -9 -18 85.2834 122.481   1
   5   9 -17 345.919 119.726  -2
   1  -9 -17 345.919 119.726   1
   1  -9 -16 11.2544 79.9468   1
   4   9 -15 1000.63 116.508  -2
   1  -9 -15 1000.63 116.508   1
   4   9 -14 8.24587 98.5447  -2
   1  -9 -14 8.24587 98.5447   1
   1  -9 -13 658.476 80.3733   1
   3   9 -12 48.8176 90.4803  -2
   1  -9 -12 48.8176 90.4803   1
   1  -9 -11 178.078 66.0759   1
  -3  -9  11 139.865 43.5009  -2
  -1   9  11 139.865 43.5009   1
   1  -9 -10 13.2743 26.6150   1
  -2  -9   9 1931.73 55.5079  -2
  -1   9   9 1931.73 55.5079   1
   1  -9  -8 129.159 20.7746   1
  -1   9   7 54.0581 19.3864   1
   1   9  -6 100.916 27.0302  -2
   1  -9  -6 100.916 27.0302   1
  -1   9   5 1878.46 32.1326   1
   1  -9  -4 0.64604 18.0075   1
   0   9  -3 3517.85 57.0020  -2
   1  -9  -3 3517.85 57.0020   1
   1  -9  -2 83.2908 20.2616   1
   1  -9  -1 4239.23 44.8628   1
   1   9   0 793.511 33.5201  -2
  -1  -9   0 793.511 33.5201   1
   1  -9   1 2714.31 35.0538   1
  -1  -9  -2 49.1395 16.3339   1
   2   9  -3 672.744 28.0431  -2
  -1  -9  -3 672.744 28.0431   1
  -1  -9  -4 14.0719 14.1157   1
   1  -9   5 208.520 33.7789   1
   3   9  -6 83.6869 66.4947  -2
  -1  -9  -6 83.6869 66.4947   1
   1   9   7 365.278 19.1442   1
   1   9   8 49.8385 16.7558   1
  -4  -9   9 1051.81 37.1755  -2
   1   9   9 1051.81 37.1755   1
   1   9  10 17.7668 20.8082   1
   5   9 -11 1482.90 99.3457  -2
  -1  -9 -11 1482.90 99.3457   1
   5   9 -12 20.6524 82.6431  -2
  -1  -9 -12 20.6524 82.6431   1
  -1  -9 -13 235.353 68.9583   1
   6   9 -14-14.0429 96.4006  -2
  -1  -9 -14-14.0429 96.4006   1
   6   9 -15 828.680 111.931  -2
  -1  -9 -15 828.680 111.931   1
  -1  -9 -16-0.28952 79.5499   1
   7   9 -17 96.6551 112.868  -2
  -1  -9 -17 96.6551 112.868   1
   7   9 -18-69.0357 119.725  -2
  -1  -9 -18-69.0357 119.725   1
  -1  -9 -19 366.767 97.6091   1
   1 -10 -19 361.108 101.488   1
   5  10 -18 359.271 127.703  -2
   1 -10 -18 359.271 127.703   1
   5  10 -17 632.969 129.097  -2
   1 -10 -17 632.969 129.097   1
   1 -10 -16 360.075 87.9570   1
   4  10 -15 310.777 109.757  -2
   1 -10 -15 310.777 109.757   1
   4  10 -14 300.338 106.376  -2
   1 -10 -14 300.338 106.376   1
   1 -10 -13 157.723 74.2280   1
   3  10 -12 293.009 96.1941  -2
   1 -10 -12 293.009 96.1941   1
   3  10 -11 234.105 89.8392  -2
   1 -10 -11 234.105 89.8392   1
   1 -10 -10 326.201 68.4480   1
  -2 -10   9 163.574 38.7863  -2
  -1  10   9 163.574 38.7863   1
  -1  10   8 736.402 27.2393   1
   1 -10  -7 622.767 25.6925   1
  -1 -10   6 1992.70 43.6745  -2
  -1  10   6 1992.70 43.6745   1
   1 -10  -5 381.992 22.7578   1
   1 -10  -4 253.820 23.2698   1
   0  10  -3 381.188 33.5138  -2
   1 -10  -3 381.188 33.5138   1
   1 -10  -2 61.7721 21.3955   1
   1 -10  -1 15.2569 20.0202   1
   1  10   0 5.19180 23.8754  -2
  -1 -10   0 5.19180 23.8754   1
   1 -10   1 67.1538 18.9433   1
  -1 -10  -2 429.902 21.2363   1
   2  10  -3 978.238 32.4959  -2
  -1 -10  -3 978.238 32.4959   1
  -1 -10  -4 1370.60 25.7002   1
   1 -10   5 309.591 35.8630   1
   3  10  -6 726.284 57.8292  -2
  -1 -10  -6 726.284 57.8292   1
  -1 -10  -7 213.921 54.3374   1
  -1 -10  -8 331.845 18.0528   1
   4  10  -9 52.3462 74.7787  -2
  -1 -10  -9 52.3462 74.7787   1
  -1 -10 -10 18.2841 59.3393   1
   5  10 -11 212.315 86.5743  -2
  -1 -10 -11 212.315 86.5743   1
   5  10 -12 633.049 99.0529  -2
  -1 -10 -12 633.049 99.0529   1
  -1 -10 -13 81.8051 66.1685   1
   6  10 -14 233.112 105.481  -2
  -1 -10 -14 233.112 105.481   1
   6  10 -15 529.576 112.985  -2
  -1 -10 -15 529.576 112.985   1
  -1 -10 -16 387.916 89.7548   1
   7  10 -17 625.501 126.533  -2
  -1 -10 -17 625.501 126.533   1
   7  10 -18 699.427 134.763  -2
  -1 -10 -18 699.427 134.763   1
  -1 -10 -19 117.747 95.7956   1
   5  11 -18 310.645 131.132  -2
   1 -11 -18 310.645 131.132   1
   5  11 -17-16.8232 120.098  -2
   1 -11 -17-16.8232 120.098   1
   1 -11 -16 207.098 88.4435   1
   4  11 -15 134.078 116.481  -2
   1 -11 -15 134.078 116.481   1
   4  11 -14 1025.48 125.351  -2
   1 -11 -14 1025.48 125.351   1
   1 -11 -13 115.275 76.7565   1
   3  11 -12 859.947 112.760  -2
   1 -11 -12 859.947 112.760   1
   3  11 -11 112.786 92.9886  -2
   1 -11 -11 112.786 92.9886   1
   1 -11 -10 230.399 73.9000   1
   2  11  -9 63.2412 87.6307  -2
   1 -11  -9 63.2412 87.6307   1
   1 -11  -8 29.3594 29.6868   1
   1 -11  -7 83.4758 21.3155   1
   1  11  -6 668.580 46.7942  -2
   1 -11  -6 668.580 46.7942   1
   1 -11  -5 15.7159 27.7553   1
  -1  11   5 46.1142 58.2043  -2
  -1 -11   5 46.1142 58.2043   1
   1 -11  -4 738.823 29.5392   1
   0  11  -3 7.54948 28.3073  -2
   1 -11  -3 7.54948 28.3073   1
   1 -11  -2 1651.77 35.5514   1
   1 -11  -1 4.48887 21.2655   1
   1  11   0 2095.37 50.0569  -2
  -1 -11   0 2095.37 50.0569   1
  -1 -11  -1 62.8902 20.0694   1
  -1 -11  -2 363.826 21.8839   1
   2  11  -3 13.2176 23.7910  -2
  -1 -11  -3 13.2176 23.7910   1
  -1 -11  -4 29.7287 15.5166   1
   1 -11   5 47.1490 35.7975   1
  -3  11   6 1222.24 67.2843  -2
   1 -11   6 1222.24 67.2843   1
   1 -11   7 79.6004 39.3791   1
  -1 -11  -8 969.997 73.7053   1
  -4  11   8 1194.48 89.2181  -2
   1 -11   8 1194.48 89.2181   1
   4  11  -9 136.056 83.7386  -2
  -1 -11  -9 136.056 83.7386   1
  -1 -11 -10 801.362 77.1917   1
   5  11 -11 162.323 90.6130  -2
  -1 -11 -11 162.323 90.6130   1
   5  11 -12 593.060 100.521  -2
  -1 -11 -12 593.060 100.521   1
  -1 -11 -13 77.9487 74.2371   1
   6  11 -14 716.152 114.949  -2
  -1 -11 -14 716.152 114.949   1
   6  11 -15 0.33358 110.613  -2
  -1 -11 -15 0.33358 110.613   1
  -1 -11 -16 39.3209 84.6769   1
   7  11 -17 47.0099 121.952  -2
  -1 -11 -17 47.0099 121.952   1
   7  11 -18 122.721 126.741  -2
  -1 -11 -18 122.721 126.741   1
   5  12 -17 398.084 131.347  -2
   1 -12 -17 398.084 131.347   1
   1 -12 -16 151.727 87.4816   1
   4  12 -15 309.328 117.222  -2
   1 -12 -15 309.328 117.222   1
   4  12 -14 287.751 115.687  -2
   1 -12 -14 287.751 115.687   1
   1 -12 -13 61.7129 78.9620   1
   3  12 -12 138.708 104.604  -2
   1 -12 -12 138.708 104.604   1
   3  12 -11 948.560 114.184  -2
   1 -12 -11 948.560 114.184   1
   1 -12 -10 62.0594 70.7461   1
   2  12  -9 521.679 101.251  -2
   1 -12  -9 521.679 101.251   1
   1 -12  -8 88.5880 31.0294   1
   1 -12  -7 1101.18 35.5931   1
   1  12  -6 303.778 37.5582  -2
   1 -12  -6 303.778 37.5582   1
   1 -12  -5 525.854 35.1855   1
  -1  12   5 1193.21 74.7673  -2
  -1 -12   5 1193.21 74.7673   1
   1 -12  -4 14.3073 23.8831   1
   0  12  -3 873.152 42.6957  -2
   1 -12  -3 873.152 42.6957   1
  -1 -12   2 43.0758 23.1446   1
  -1 -12   1 209.570 22.7039   1
  -1  12   0 6.03873 26.1250  -2
   1 -12   0 6.03873 26.1250   1
  -1 -12  -1 574.113 26.5269   1
   1 -12   2 26.6294 19.5458   1
  -2  12   3 1857.01 42.4451  -2
   1 -12   3 1857.01 42.4451   1
  -1 -12  -4 113.003 16.1768   1
  -1 -12  -5 1039.58 49.3195   1
  -3  12   6 136.764 54.2352  -2
   1 -12   6 136.764 54.2352   1
   1 -12   7 392.723 45.7783   1
  -1 -12  -8-8.84889 60.9690   1
  -4  12   8-19.7986 77.7655  -2
   1 -12   8-19.7986 77.7655   1
  -4  12   9 458.471 65.1340  -2
   1 -12   9 458.471 65.1340   1
  -1 -12 -10 143.073 46.3302   1
  -5  12  11 575.292 70.8747  -2
   1 -12  11 575.292 70.8747   1
   5  12 -12 294.160 101.107  -2
  -1 -12 -12 294.160 101.107   1
  -1 -12 -13 293.450 82.4650   1
   6  12 -14 274.485 112.344  -2
  -1 -12 -14 274.485 112.344   1
   6  12 -15 276.164 118.782  -2
  -1 -12 -15 276.164 118.782   1
  -1 -12 -16 308.323 97.2733   1
   7  12 -17 645.955 134.382  -2
  -1 -12 -17 645.955 134.382   1
   1 -13 -16 56.3260 91.6834   1
   4  13 -15 478.311 126.816  -2
   1 -13 -15 478.311 126.816   1
   4  13 -14 298.258 122.093  -2
   1 -13 -14 298.258 122.093   1
   1 -13 -13 605.811 94.4914   1
   3  13 -12 579.940 118.782  -2
   1 -13 -12 579.940 118.782   1
   3  13 -11 550.982 112.364  -2
   1 -13 -11 550.982 112.364   1
   1 -13 -10 243.333 76.8469   1
  -2  13   9 644.176 69.4334  -2
  -1 -13   9 644.176 69.4334   1
   1 -13  -8 101.735 70.6141   1
  -2  13   8 164.295 75.4603  -2
  -1 -13   8 164.295 75.4603   1
  -1 -13   7-16.6197 40.7682   1
   1  13  -6 50.1953 50.9371  -2
   1 -13  -6 50.1953 50.9371   1
   1 -13  -5 80.5417 26.1256   1
   1 -13  -4 22.6597 25.2616   1
   0  13  -3 825.613 43.8856  -2
   1 -13  -3 825.613 43.8856   1
  -1 -13   2 2.92362 24.3891   1
   1 -13  -1 767.094 28.5486   1
   1  13   0 16.3514 25.4028  -2
  -1 -13   0 16.3514 25.4028   1
   1 -13   1 374.037 24.3692   1
  -1 -13  -2-3.68257 34.2954   1
  -2  13   3 14.5295 41.5406  -2
   1 -13   3 14.5295 41.5406   1
  -1 -13  -4 155.645 38.2897   1
   1 -13   5 173.053 41.6558   1
   3  13  -6 126.097 56.5749  -2
  -1 -13  -6 126.097 56.5749   1
  -1 -13  -7 378.163 48.6176   1
  -1 -13  -8 295.911 68.2245   1
  -4  13   8 468.900 89.6666  -2
   1 -13   8 468.900 89.6666   1
  -4  13   9 1005.76 76.3070  -2
   1 -13   9 1005.76 76.3070   1
  -1 -13 -10 304.011 52.7885   1
   5  13 -11 737.739 76.3948  -2
  -1 -13 -11 737.739 76.3948   1
  -5  13  12 110.783 71.0315  -2
   1 -13  12 110.783 71.0315   1
   1 -13  13 358.160 60.1784   1
   6  13 -14 159.216 78.4616  -2
  -1 -13 -14 159.216 78.4616   1
   6  13 -15 481.893 126.058  -2
  -1 -13 -15 481.893 126.058   1
  -1 -13 -16-37.2652 86.1592   1
   4  14 -14 159.520 119.594  -2
   1 -14 -14 159.520 119.594   1
   1 -14 -13 52.4268 84.8552   1
  -3  14  12 787.360 83.2283  -2
  -1 -14  12 787.360 83.2283   1
   3  14 -11 48.2571 71.3126  -2
   1 -14 -11 48.2571 71.3126   1
   1 -14 -10 584.853 56.9952   1
  -2  14   9 60.6636 65.0756  -2
  -1 -14   9 60.6636 65.0756   1
   1 -14  -8 876.248 93.6951   1
  -2  14   8 1118.54 93.2990  -2
  -1 -14   8 1118.54 93.2990   1
  -1 -14   7 0.61182 43.4617   1
  -1  14   6 1726.82 80.9665  -2
  -1 -14   6 1726.82 80.9665   1
   1 -14  -5 22.1264 40.1051   1
  -1 -14   4 392.877 42.1939   1
   0  14  -3-17.2519 47.9774  -2
   1 -14  -3-17.2519 47.9774   1
  -1 -14   2 48.4274 29.8338   1
   1 -14  -1 77.0699 29.7508   1
  -1  14   0 744.707 52.0464  -2
   1 -14   0 744.707 52.0464   1
   1 -14   1 32.0899 31.2857   1
  -1 -14  -2 624.156 45.4887   1
  -2  14   3 140.655 54.7960  -2
   1 -14   3 140.655 54.7960   1
   1 -14   4 934.232 51.3213   1
   1 -14   5 45.6004 41.0984   1
  -3  14   6 1204.67 78.0475  -2
   1 -14   6 1204.67 78.0475   1
  -1 -14  -7 25.1256 44.1556   1
  -1 -14  -8 339.983 75.1551   1
  -4  14   8 1262.52 104.003  -2
   1 -14   8 1262.52 104.003   1
   4  14  -9 10.5168 66.5874  -2
  -1 -14  -9 10.5168 66.5874   1
   1 -14  10 85.1262 51.4377   1
   5  14 -11 109.883 73.8385  -2
  -1 -14 -11 109.883 73.8385   1
  -5  14  12 488.288 81.5223  -2
   1 -14  12 488.288 81.5223   1
  -1 -14 -13 70.9238 57.4576   1
   6  14 -14 257.312 123.026  -2
  -1 -14 -14 257.312 123.026   1
   1 -15 -13 231.629 62.1924   1
   3  15 -12 690.802 86.9891  -2
   1 -15 -12 690.802 86.9891   1
  -3  15  11 239.710 78.5944  -2
  -1 -15  11 239.710 78.5944   1
  -1 -15  10 390.743 58.9780   1
  -2  15   9 238.106 72.9999  -2
  -1 -15   9 238.106 72.9999   1
   1 -15  -8 188.854 82.8863   1
  -2  15   8 491.023 90.1490  -2
  -1 -15   8 491.023 90.1490   1
   1 -15  -7 6.84119 45.0784   1
   1  15  -6 43.5469 104.598  -2
   1 -15  -6 43.5469 104.598   1
   1 -15  -5 10.7113 72.4598   1
   1 -15  -4 88.3827 68.2300   1
   0  15  -3 114.276 64.8674  -2
   1 -15  -3 114.276 64.8674   1
  -1 -15   2 309.560 49.6647   1
   1 -15  -1 71.7907 45.6043   1
  -1  15   0 721.106 61.8315  -2
   1 -15   0 721.106 61.8315   1
  -1 -15  -1 14.1586 44.1754   1
  -1 -15  -2 87.9047 46.2398   1
   2  15  -3 19.9084 54.9233  -2
  -1 -15  -3 19.9084 54.9233   1
   1 -15   4-9.69636 44.8638   1
  -1 -15  -5 71.5937 44.3063   1
  -3  15   6 424.739 68.9721  -2
   1 -15   6 424.739 68.9721   1
   1 -15   7 242.785 50.9470   1
  -1 -15  -8 326.068 78.9902   1
  -4  15   8 431.512 96.4376  -2
   1 -15   8 431.512 96.4376   1
  -4  15   9 306.786 74.9115  -2
   1 -15   9 306.786 74.9115   1
   1 -15  10 373.820 59.6754   1
   5  15 -11 270.912 79.4103  -2
  -1 -15 -11 270.912 79.4103   1
   5  15 -12 342.902 83.7599  -2
  -1 -15 -12 342.902 83.7599   1
   3  16 -11 579.746 131.540  -2
   1 -16 -11 579.746 131.540   1
   1 -16 -10 75.3870 85.3430   1
   2  16  -9 835.630 134.235  -2
   1 -16  -9 835.630 134.235   1
   1 -16  -8-12.9206 82.6268   1
   1 -16  -7 809.742 100.278   1
   1  16  -6-1.59390 109.661  -2
   1 -16  -6-1.59390 109.661   1
   1 -16  -5 408.327 87.4030   1
   1 -16  -4-0.83391 51.5594   1
   0  16  -3 653.031 78.9388  -2
   1 -16  -3 653.031 78.9388   1
   1 -16  -2-22.9258 48.8815   1
  -1 -16   1 17.4633 49.7760   1
  -1  16   0-10.1882 66.8499  -2
   1 -16   0-10.1882 66.8499   1
   1 -16   1 320.336 53.0355   1
  -1 -16  -2 1.09502 48.8388   1
   2  16  -3 1466.31 94.9738  -2
  -1 -16  -3 1466.31 94.9738   1
  -1 -16  -4-29.8834 71.9628   1
  -1 -16  -5 753.923 89.5227   1
   3  16  -6 76.2413 105.064  -2
  -1 -16  -6 76.2413 105.064   1
  -1 -16  -7 781.283 94.8974   1
  -1 -16  -8 12.8023 80.9131   1
   1 -16   9 288.432 83.2550   1
   4  16  -9 638.700 126.896  -2
  -1 -16  -9 638.700 126.896   1
   1 -16  10-8.56256 59.1910   1
   1 -17  -8 13.6995 86.7694   1
   1 -17  -7 28.8510 83.0410   1
   1  17  -6-14.7543 114.527  -2
   1 -17  -6-14.7543 114.527   1
   1 -17  -5 74.3791 56.3035   1
   1 -17  -4 160.525 56.1822   1
   0  17   3 226.430 77.0823  -2
  -1 -17   3 226.430 77.0823   1
   1 -17  -2 288.891 57.6462   1
   1 -17  -1 44.2952 54.7518   1
   1  17   0 497.653 83.5593  -2
  -1 -17   0 497.653 83.5593   1
  -1 -17  -1 3.66199 52.6079   1
  -1 -17  -2 69.8480 51.5724   1
   2  17  -3-9.46300 67.1759  -2
  -1 -17  -3-9.46300 67.1759   1
  -1 -17  -4 30.5195 55.4825   1
  -1 -17  -5 6.50789 80.9332   1
   1 -18  -2 212.072 84.5723   1
   1 -18  -1-4.50158 82.6451   1
   2   0 -22 191.386 92.0523   1
   5   0 -20 201.572 118.722  -2
   2   0 -20 201.572 118.722   1
   4   0 -18 740.590 110.194  -2
   2   0 -18 740.590 110.194   1
   2   0 -16 404.245 75.7183   1
   3   0 -14 1969.05 107.605  -2
   2   0 -14 1969.05 107.605   1
   2   0 -12 323.806 78.2726  -2
   2   0 -12 323.806 78.2726   1
   2   0 -10 441.269 56.3568   1
   2   0  -8 1144.71 58.8296   1
   0   0  -6 4720.72 92.6828  -2
   2   0  -6 4720.72 92.6828   1
   2   0  -4 4455.85 44.9947   1
   2   0  -2 8026.59 41.8447   1
  -2   0   0 9378.53 80.9607  -2
   2   0   0 9378.53 80.9607   1
  -2   0  -2 366.767 27.1984   1
  -2   0  -4 356.524 33.9804   1
   4   0  -6 5344.96 103.992  -2
  -2   0  -6 5344.96 103.992   1
   2   0   8 241.364 31.4781   1
  -2   0 -10 967.812 63.9883   1
   6   0 -12 3120.08 110.826  -2
  -2   0 -12 3120.08 110.826   1
   7   0 -14 145.953 84.4729  -2
  -2   0 -14 145.953 84.4729   1
  -2   0 -16 17.4509 66.6461   1
   8   0 -18 289.130 106.889  -2
  -2   0 -18 289.130 106.889   1
   9   0 -20 804.258 136.056  -2
  -2   0 -20 804.258 136.056   1
   2   1 -22 420.144 71.9512   1
   5  -1 -21 796.380 91.6494  -2
   2   1 -21 796.380 91.6494   1
   5  -1 -20 1329.06 99.2553  -2
   2   1 -20 1329.06 99.2553   1
   2  -1 -19 900.229 68.4081   1
   4   1 -18 1378.64 85.6747  -2
   2  -1 -18 1378.64 85.6747   1
   4  -1 -17 327.590 69.9376  -2
   2   1 -17 327.590 69.9376   1
   2   1 -16 149.910 49.7435   1
   3   1 -15 387.548 63.6830  -2
   2  -1 -15 387.548 63.6830   1
   3   1 -14 832.064 65.4945  -2
   2  -1 -14 832.064 65.4945   1
   2  -1 -13 56.8679 41.3809   1
   2   1 -12 196.121 54.0474  -2
   2  -1 -12 196.121 54.0474   1
   2   1 -11 547.696 37.6549   1
   2   1 -11 935.666 80.1576  -2
   2  -1 -11 935.666 80.1576   1
  -2   1  10 408.084 28.2350   1
  -1  -1   9 2049.54 44.9334  -2
  -2   1   9 2049.54 44.9334   1
   2  -1  -8 900.873 40.5579   1
   2  -1  -7 539.435 33.7886   1
   0  -1  -6 2201.27 51.7803  -2
   2   1  -6 2201.27 51.7803   1
   2   1  -5 32.1041 20.0786   1
   2  -1  -4 413.238 21.5352   1
  -1   1  -3 77.9160 22.6567  -2
   2  -1  -3 77.9160 22.6567   1
   2  -1  -2 389.038 12.8599   1
   2   1  -1 198.619 14.1037   1
  -2  -1   0 2432.47 26.4253  -2
   2   1   0 2432.47 26.4253   1
  -2  -1  -1 92.9439 8.99892   1
   2   1   2 771.972 19.8387   1
   3   1  -3 3424.61 47.8090  -2
  -2  -1  -3 3424.61 47.8090   1
  -2  -1  -4 26.9071 17.9288   1
  -2   1  -5 486.482 23.2911   1
   4  -1  -6 565.158 34.5153  -2
  -2   1  -6 565.158 34.5153   1
   2   1   7 22.4337 24.2537   1
   2   1   8 177.374 24.8083   1
   5  -1  -9 798.664 41.6396  -2
  -2   1  -9 798.664 41.6396   1
  -2  -1 -10 1041.68 36.6014   1
  -2   1 -11 413.903 41.7239   1
   6  -1 -12 1424.99 67.2330  -2
  -2   1 -12 1424.99 67.2330   1
  -2   1 -13 1360.87 56.1360   1
   7   1 -14 1449.61 71.8685  -2
  -2  -1 -14 1449.61 71.8685   1
   7  -1 -15 1381.24 75.9715  -2
  -2   1 -15 1381.24 75.9715   1
  -2  -1 -16 875.693 60.0635   1
   8   1 -17 825.148 79.0283  -2
  -2  -1 -17 825.148 79.0283   1
   8   1 -18 526.865 80.3044  -2
  -2  -1 -18 526.865 80.3044   1
  -2   1 -19 68.8027 59.3525   1
   9   1 -20 56.8057 84.7941  -2
  -2  -1 -20 56.8057 84.7941   1
   9   1 -21 143.765 87.6797  -2
  -2  -1 -21 143.765 87.6797   1
   2   2 -22 45.5330 62.8327   1
   5  -2 -21 73.8471 87.3463  -2
   2   2 -21 73.8471 87.3463   1
   5   2 -20 69.8678 83.7076  -2
   2  -2 -20 69.8678 83.7076   1
   2   2 -19 79.4307 56.0621   1
   4   2 -18 214.988 73.8429  -2
   2  -2 -18 214.988 73.8429   1
   4  -2 -17 1176.12 83.2510  -2
   2   2 -17 1176.12 83.2510   1
   2  -2 -16-9.29849 47.2591   1
   3   2 -15 1396.39 75.6041  -2
   2  -2 -15 1396.39 75.6041   1
   3   2 -14 58.5186 57.9593  -2
   2  -2 -14 58.5186 57.9593   1
   2   2 -13 1261.80 55.6654   1
   2   2 -12 720.558 59.0375  -2
   2  -2 -12 720.558 59.0375   1
  -2   2  11 330.153 35.4288   1
   2   2 -11 672.827 77.6778  -2
   2  -2 -11 672.827 77.6778   1
   2  -2 -10 6.22307 20.9450   1
  -1  -2   9 1863.46 44.9120  -2
  -2   2   9 1863.46 44.9120   1
   2   2  -8 93.5967 20.4727   1
   2   2  -7 2697.12 33.5005   1
   0   2  -6 61.3577 21.8768  -2
   2  -2  -6 61.3577 21.8768   1
   2  -2  -5 370.132 18.5300   1
  -2  -2   4 393.733 17.6564   1
  -1  -2  -3 6165.03 40.3696  -2
   2   2  -3 6165.03 40.3696   1
   2   2  -2 26.7799 11.4187   1
  -2  -2   1 5777.15 35.5426   1
  -2   2   0 43.0295 12.3818  -2
   2  -2   0 43.0295 12.3818   1
   2   2   1 4443.57 22.9241   1
   2   2   2 333.778 11.4418   1
  -3  -2   3 628.279 29.4106  -2
   2   2   3 628.279 29.4106   1
  -2  -2  -4 125.171 20.8554   1
  -2  -2  -5 752.285 28.5525   1
   4   2  -6 1168.32 38.5331  -2
  -2  -2  -6 1168.32 38.5331   1
  -2  -2  -7 1320.37 33.0033   1
  -2  -2  -8 286.488 25.5901   1
   5  -2  -9 1032.25 42.8136  -2
  -2   2  -9 1032.25 42.8136   1
   2   2  10 60.9208 28.1532   1
  -2  -2 -11 955.454 66.1708   1
   6  -2 -11 2538.20 100.690  -2
  -2   2 -11 2538.20 100.690   1
   6  -2 -12 132.668 56.5060  -2
  -2   2 -12 132.668 56.5060   1
  -2   2 -13 41.1589 42.0389   1
   7   2 -14 79.1561 60.3438  -2
  -2  -2 -14 79.1561 60.3438   1
   7  -2 -15 1302.38 74.8876  -2
  -2   2 -15 1302.38 74.8876   1
  -2   2 -16 25.5009 47.8238   1
   8  -2 -17 669.095 77.5583  -2
  -2   2 -17 669.095 77.5583   1
   8  -2 -18 100.711 76.9224  -2
  -2   2 -18 100.711 76.9224   1
  -2   2 -19 602.187 66.7382   1
   9   2 -20 185.810 85.3660  -2
  -2  -2 -20 185.810 85.3660   1
   9   2 -21 677.510 94.3466  -2
  -2  -2 -21 677.510 94.3466   1
   2   3 -22 349.610 70.9681   1
   5   3 -21 501.673 92.2535  -2
   2  -3 -21 501.673 92.2535   1
   5  -3 -20 1142.41 100.627  -2
   2   3 -20 1142.41 100.627   1
   2  -3 -19 338.260 62.5463   1
   4  -3 -18 505.487 78.9929  -2
   2   3 -18 505.487 78.9929   1
   4   3 -17 175.120 71.2969  -2
   2  -3 -17 175.120 71.2969   1
   2  -3 -16 44.0868 48.6985   1
   3   3 -15 1001.65 71.9688  -2
   2  -3 -15 1001.65 71.9688   1
   3   3 -14 986.181 68.8872  -2
   2  -3 -14 986.181 68.8872   1
   2   3 -13 58.9959 40.5894   1
   2  -3 -12 332.936 55.4866  -2
   2   3 -12 332.936 55.4866   1
   2  -3 -11 621.303 41.8166  -2
   2   3 -11 621.303 41.8166   1
  -2   3  10 1082.42 29.8367   1
  -1   3   9 587.998 31.8698  -2
  -2  -3   9 587.998 31.8698   1
  -2   3   8 2516.06 34.8226   1
   2   3  -7 944.413 22.5457   1
   0  -3   6 3434.81 37.4081  -2
  -2   3   6 3434.81 37.4081   1
   2   3  -5 389.087 16.6584   1
   2  -3  -4 112.047 14.3317   1
   1   3   3 276.490 21.6021  -2
  -2  -3   3 276.490 21.6021   1
   2  -3  -2 869.557 20.5437   1
  -2  -3   1-5.21101 16.0271   1
   2   3   0 45.5585 19.8132  -2
  -2  -3   0 45.5585 19.8132   1
   2  -3   1 1745.90 19.5300   1
  -2  -3  -2 482.654 16.2343   1
  -3  -3   3 259.324 27.5466  -2
   2   3   3 259.324 27.5466   1
   2   3   4 2170.54 33.8912   1
  -2  -3  -5 80.5230 23.8813   1
   4   3  -6 424.633 38.6743  -2
  -2  -3  -6 424.633 38.6743   1
  -2  -3  -7 3.13049 26.7983   1
   2   3   8 33.0229 27.6597   1
   5  -3  -9 669.165 42.1602  -2
  -2   3  -9 669.165 42.1602   1
  -2  -3 -10 319.274 38.2380   1
  -2  -3 -11 677.598 62.0322   1
   6  -3 -11 1261.05 93.6448  -2
  -2   3 -11 1261.05 93.6448   1
   6  -3 -12 1159.93 66.2080  -2
  -2   3 -12 1159.93 66.2080   1
  -2   3 -13 646.393 50.2007   1
   7   3 -14 947.476 71.5303  -2
  -2  -3 -14 947.476 71.5303   1
   7   3 -15 806.059 71.3407  -2
  -2  -3 -15 806.059 71.3407   1
  -2  -3 -16 733.634 59.1278   1
   8  -3 -17 522.378 78.0159  -2
  -2   3 -17 522.378 78.0159   1
   8  -3 -18 670.233 83.0341  -2
  -2   3 -18 670.233 83.0341   1
  -2   3 -19 96.7243 59.7916   1
   9   3 -20 64.8088 85.0463  -2
  -2  -3 -20 64.8088 85.0463   1
   9   3 -21 116.151 87.6044  -2
  -2  -3 -21 116.151 87.6044   1
   2   4 -22 123.820 67.9191   1
   5  -4 -21 45.1370 88.7528  -2
   2   4 -21 45.1370 88.7528   1
   5  -4 -20 50.3123 83.9035  -2
   2   4 -20 50.3123 83.9035   1
   2   4 -19 92.8995 60.1793   1
   4   4 -18 577.708 80.0123  -2
   2  -4 -18 577.708 80.0123   1
   4   4 -17 466.510 75.3381  -2
   2  -4 -17 466.510 75.3381   1
   2   4 -16 1052.66 62.8157   1
   3  -4 -15 49.2490 63.7105  -2
   2   4 -15 49.2490 63.7105   1
   3   4 -14 2031.86 77.5802  -2
   2  -4 -14 2031.86 77.5802   1
   2  -4 -13 824.987 50.6876   1
   2  -4 -12 630.887 59.3260  -2
   2   4 -12 630.887 59.3260   1
  -2   4  11 793.372 50.5391   1
   2  -4 -11 1542.02 64.1665  -2
   2   4 -11 1542.02 64.1665   1
   2   4 -10 154.388 23.9690   1
   1   4  -9 84.3533 28.7822  -2
   2  -4  -9 84.3533 28.7822   1
  -2   4   8 283.873 19.0416   1
   2  -4  -7 34.2663 17.2484   1
   0  -4   6 1857.39 32.9926  -2
  -2   4   6 1857.39 32.9926   1
  -2  -4   5 1.55750 16.6485   1
   2  -4  -4 3170.83 29.5279   1
   1   4   3 326.747 22.6329  -2
  -2  -4   3 326.747 22.6329   1
  -2   4   2 2696.39 31.3648   1
   2  -4  -1 170.178 22.1492   1
  -2   4   0 3216.51 55.4732  -2
   2  -4   0 3216.51 55.4732   1
  -2  -4  -1 34.6573 17.9704   1
   2  -4   2 67.5774 15.3937   1
  -3  -4   3 679.395 31.9237  -2
   2   4   3 679.395 31.9237   1
  -2  -4  -4 814.969 15.7181   1
   2   4   5 1573.36 22.8103   1
  -4  -4   6 3610.16 43.3403  -2
   2   4   6 3610.16 43.3403   1
   2   4   7 826.515 24.0123   1
  -2  -4  -8 3755.26 49.7517   1
  -5  -4   8 3772.94 86.0495  -2
   2   4   8 3772.94 86.0495   1
  -5  -4   9 580.784 34.0391  -2
   2   4   9 580.784 34.0391   1
   2   4  10 1563.71 43.2932   1
  -2  -4 -11 346.892 58.6074   1
  -6  -4  11 402.780 53.4245  -2
   2   4  11 402.780 53.4245   1
  -6  -4  12 1593.17 57.9222  -2
   2   4  12 1593.17 57.9222   1
  -2  -4 -13 155.501 59.9044   1
   7   4 -14 615.877 93.4961  -2
  -2  -4 -14 615.877 93.4961   1
   7   4 -15 121.409 92.6951  -2
  -2  -4 -15 121.409 92.6951   1
  -2  -4 -16 243.752 74.0672   1
   8   4 -17 113.102 102.387  -2
  -2  -4 -17 113.102 102.387   1
   8   4 -18 645.078 114.430  -2
  -2  -4 -18 645.078 114.430   1
  -2  -4 -19 150.348 85.3805   1
   9   4 -20 1006.50 133.695  -2
  -2  -4 -20 1006.50 133.695   1
   9   4 -21 232.158 124.334  -2
  -2  -4 -21 232.158 124.334   1
   5   5 -21 701.600 94.3564  -2
   2  -5 -21 701.600 94.3564   1
   5   5 -20 174.793 88.3940  -2
   2  -5 -20 174.793 88.3940   1
   2  -5 -19 320.064 64.4578   1
   4   5 -18 184.540 78.3544  -2
   2  -5 -18 184.540 78.3544   1
   4  -5 -17 205.064 76.2308  -2
   2   5 -17 205.064 76.2308   1
   2  -5 -16 97.2789 50.3282   1
   3  -5 -15 1192.90 75.9610  -2
   2   5 -15 1192.90 75.9610   1
   3   5 -14 434.860 65.0153  -2
   2  -5 -14 434.860 65.0153   1
   2   5 -13 244.971 44.0893   1
   2  -5 -12-2.15011 55.6087  -2
   2   5 -12-2.15011 55.6087   1
  -2  -5  11 1761.55 48.7090  -2
  -2   5  11 1761.55 48.7090   1
  -2   5  10 5.31941 24.7635   1
  -1  -5   9 2593.44 46.6661  -2
  -2   5   9 2593.44 46.6661   1
  -2   5   8 70.2894 19.4618   1
   2  -5  -7 1768.28 28.7429   1
   0  -5   6 545.728 27.3982  -2
  -2   5   6 545.728 27.3982   1
  -2  -5   5 187.502 18.1649   1
   2  -5  -4 7.64515 16.4965   1
  -1   5  -3 777.627 31.8893  -2
   2  -5  -3 777.627 31.8893   1
   2  -5  -2 243.921 20.8857   1
  -2   5   1 1889.59 34.9317   1
   2  -5   0 22.9426 30.6191  -2
  -2   5   0 22.9426 30.6191   1
   2  -5   1 4633.48 46.1541   1
   2  -5   2 133.815 22.7813   1
  -3  -5   3 4567.79 53.7157  -2
   2   5   3 4567.79 53.7157   1
  -2  -5  -4 76.7837 21.3179   1
   2   5   5 1332.52 19.4076   1
  -4  -5   6 43.9162 20.0350  -2
   2   5   6 43.9162 20.0350   1
  -2  -5  -7 744.037 21.8124   1
  -2  -5  -8 8.22571 17.6809   1
   5   5  -9 2523.00 45.5225  -2
  -2  -5  -9 2523.00 45.5225   1
  -2  -5 -10 350.371 29.0075   1
  -2  -5 -11 336.769 55.2945   1
  -6  -5  11 1492.18 57.9296  -2
   2   5  11 1492.18 57.9296   1
   6   5 -12 382.627 43.8323  -2
  -2  -5 -12 382.627 43.8323   1
  -2  -5 -13 1041.52 44.3904   1
   7   5 -14 175.133 87.3749  -2
  -2  -5 -14 175.133 87.3749   1
   7   5 -15 829.731 104.211  -2
  -2  -5 -15 829.731 104.211   1
  -2  -5 -16 313.311 74.6845   1
   8   5 -17 829.344 115.831  -2
  -2  -5 -17 829.344 115.831   1
   8   5 -18 233.980 113.333  -2
  -2  -5 -18 233.980 113.333   1
  -2  -5 -19 53.2777 83.1737   1
   9   5 -20 69.2091 121.865  -2
  -2  -5 -20 69.2091 121.865   1
   9   5 -21 5.01375 123.702  -2
  -2  -5 -21 5.01375 123.702   1
   5   6 -21 256.843 128.461  -2
   2  -6 -21 256.843 128.461   1
   5   6 -20 175.294 127.600  -2
   2  -6 -20 175.294 127.600   1
   2  -6 -19 46.8314 89.6956   1
   4   6 -18 729.841 124.702  -2
   2  -6 -18 729.841 124.702   1
   4   6 -17 876.399 119.942  -2
   2  -6 -17 876.399 119.942   1
   2  -6 -16 722.790 84.8441   1
   3   6 -15 1197.37 111.652  -2
   2  -6 -15 1197.37 111.652   1
   3   6 -14 814.255 102.029  -2
   2  -6 -14 814.255 102.029   1
   2  -6 -13 1313.74 84.1953   1
   2   6 -12 1004.59 95.4204  -2
   2  -6 -12 1004.59 95.4204   1
   2   6 -11 481.655 47.2905  -2
   2  -6 -11 481.655 47.2905   1
   2  -6 -10 587.150 35.6465   1
   1   6  -9 393.850 33.8942  -2
   2  -6  -9 393.850 33.8942   1
  -2   6   8 106.454 19.0002   1
   2  -6  -7 55.4597 16.5885   1
   0   6  -6 381.228 26.1447  -2
   2  -6  -6 381.228 26.1447   1
  -2   6   5 1195.35 24.0340   1
   2  -6  -4 13.8349 15.9626   1
   1  -6   3 2566.38 46.2237  -2
  -2   6   3 2566.38 46.2237   1
   2  -6  -2 65.1447 18.8322   1
   2  -6  -1 459.236 25.4312   1
  -2   6   0 87.0376 20.6457  -2
   2  -6   0 87.0376 20.6457   1
  -2  -6  -1 397.621 11.5385   1
   2  -6   2-9.54302 22.4150   1
   3   6  -3 534.272 40.0624  -2
  -2  -6  -3 534.272 40.0624   1
   2   6   4 118.257 22.4620   1
   2   6   5 557.486 12.4597   1
  -4  -6   6 690.913 23.1234  -2
   2   6   6 690.913 23.1234   1
   2   6   7 1720.33 27.0628   1
   2   6   8 1238.74 27.1036   1
   5   6  -9 1145.21 42.3880  -2
  -2  -6  -9 1145.21 42.3880   1
   2   6  10 300.621 27.7902   1
   6   6 -11 1398.02 48.8391  -2
  -2  -6 -11 1398.02 48.8391   1
  -6  -6  12 21.5203 39.8339  -2
   2   6  12 21.5203 39.8339   1
  -2  -6 -13-4.19930 31.8746   1
   7   6 -14 310.167 94.0946  -2
  -2  -6 -14 310.167 94.0946   1
   7   6 -15 170.390 95.7864  -2
  -2  -6 -15 170.390 95.7864   1
  -2  -6 -16 216.846 76.6351   1
   8   6 -17 382.608 109.176  -2
  -2  -6 -17 382.608 109.176   1
   8   6 -18 187.792 116.850  -2
  -2  -6 -18 187.792 116.850   1
  -2  -6 -19 592.037 99.0022   1
   9   6 -20 254.527 125.686  -2
  -2  -6 -20 254.527 125.686   1
   5   7 -20 272.254 134.256  -2
   2  -7 -20 272.254 134.256   1
   2  -7 -19 61.5063 87.6485   1
   4   7 -18 307.341 118.657  -2
   2  -7 -18 307.341 118.657   1
   4   7 -17 2.33043 110.620  -2
   2  -7 -17 2.33043 110.620   1
   2  -7 -16 88.0686 78.0027   1
   3   7 -15 14.8196 98.9387  -2
   2  -7 -15 14.8196 98.9387   1
   3   7 -14 328.774 97.8617  -2
   2  -7 -14 328.774 97.8617   1
   2  -7 -13 47.3357 63.0486   1
   2   7 -12 3096.14 122.312  -2
   2  -7 -12 3096.14 122.312   1
  -2  -7  11 31.9460 41.1583  -2
  -2   7  11 31.9460 41.1583   1
   2  -7 -10 1020.59 40.7807   1
   1   7  -9 10.5378 29.7740  -2
   2  -7  -9 10.5378 29.7740   1
   2  -7  -8 1725.35 34.2156   1
   2  -7  -7 5.84064 17.5306   1
   0  -7   6 4190.99 50.8243  -2
  -2   7   6 4190.99 50.8243   1
   2  -7  -5 333.970 19.4826   1
   2  -7  -4 338.638 21.3949   1
  -1   7  -3 4.99932 24.2227  -2
   2  -7  -3 4.99932 24.2227   1
  -2   7   2 791.764 25.2685   1
   2  -7  -1 48.7177 34.8851   1
   2   7   0 2699.09 39.1316  -2
  -2  -7   0 2699.09 39.1316   1
  -2  -7  -1 672.488 15.4820   1
   2  -7   2 2634.85 45.2391   1
   3   7  -3 1.50850 32.4126  -2
  -2  -7  -3 1.50850 32.4126   1
   2  -7   4 2064.64 45.4435   1
  -2  -7  -5-3.96336 25.3796   1
  -4  -7   6 1433.23 24.2842  -2
   2   7   6 1433.23 24.2842   1
   2   7   7 21.0148 12.1547   1
  -2  -7  -8 796.666 39.9745   1
  -5  -7   8 3795.42 49.6946  -2
   2   7   8 3795.42 49.6946   1
   5   7  -9 84.4880 28.8052  -2
  -2  -7  -9 84.4880 28.8052   1
  -2  -7 -10 78.2283 23.7197   1
  -2  -7 -11 158.230 53.4562   1
  -6  -7  11 170.204 41.8765  -2
   2   7  11 170.204 41.8765   1
  -6  -7  12 1385.52 52.9523  -2
   2   7  12 1385.52 52.9523   1
  -2  -7 -13 10.5399 59.3863   1
   7   7 -14 1071.72 105.381  -2
  -2  -7 -14 1071.72 105.381   1
   7   7 -15 29.8922 97.3049  -2
  -2  -7 -15 29.8922 97.3049   1
  -2  -7 -16 62.7526 72.1816   1
   8   7 -17 16.6825 108.520  -2
  -2  -7 -17 16.6825 108.520   1
   8   7 -18 933.647 126.199  -2
  -2  -7 -18 933.647 126.199   1
  -2  -7 -19-1.74859 87.3718   1
   9   7 -20 98.5166 122.160  -2
  -2  -7 -20 98.5166 122.160   1
   5   8 -20 221.546 131.703  -2
   2  -8 -20 221.546 131.703   1
   2  -8 -19 121.363 90.7410   1
   4   8 -18 745.400 129.822  -2
   2  -8 -18 745.400 129.822   1
   4   8 -17 952.094 129.283  -2
   2  -8 -17 952.094 129.283   1
   2  -8 -16 351.751 84.1897   1
   3   8 -15 670.223 111.166  -2
   2  -8 -15 670.223 111.166   1
   3   8 -14 1076.86 108.914  -2
   2  -8 -14 1076.86 108.914   1
   2  -8 -13 938.473 82.2618   1
   2   8 -12 1475.94 105.810  -2
   2  -8 -12 1475.94 105.810   1
  -2  -8  11 975.710 48.7716  -2
  -2   8  11 975.710 48.7716   1
  -2   8  10 394.685 33.8054   1
   1   8  -9 558.313 34.9327  -2
   2  -8  -9 558.313 34.9327   1
   2  -8  -8 115.355 22.0031   1
   2  -8  -7 126.685 22.7184   1
   0   8   6 333.763 28.3326  -2
  -2  -8   6 333.763 28.3326   1
  -2  -8   5 116.884 18.2727   1
  -2   8   4 368.707 22.7675   1
  -1   8  -3 898.363 36.6383  -2
   2  -8  -3 898.363 36.6383   1
   2  -8  -2 143.759 21.5776   1
   2  -8  -1 13.5984 18.9708   1
  -2   8   0 11.8916 17.0534  -2
   2  -8   0 11.8916 17.0534   1
  -2  -8  -1 34.1977 12.6435   1
  -2  -8  -2 9.91347 8.02446   1
   3   8  -3 300.393 41.1481  -2
  -2  -8  -3 300.393 41.1481   1
   2  -8   4 219.357 30.3308   1
   2  -8   5 1025.52 41.0545   1
   4   8  -6 1244.62 80.6897  -2
  -2  -8  -6 1244.62 80.6897   1
  -2  -8  -7 399.795 52.8444   1
   2   8   8 795.373 21.3266   1
  -5  -8   9 401.984 27.3909  -2
   2   8   9 401.984 27.3909   1
  -2  -8 -10 486.276 25.4828   1
  -6  -8  11 394.774 34.5718  -2
   2   8  11 394.774 34.5718   1
   6   8 -12 206.613 83.8960  -2
  -2  -8 -12 206.613 83.8960   1
  -2  -8 -13 67.7213 61.9045   1
   7   8 -14 116.518 93.1691  -2
  -2  -8 -14 116.518 93.1691   1
   7   8 -15 113.301 100.300  -2
  -2  -8 -15 113.301 100.300   1
  -2  -8 -16-36.4317 77.1847   1
   8   8 -17 383.198 118.173  -2
  -2  -8 -17 383.198 118.173   1
   8   8 -18 266.685 121.487  -2
  -2  -8 -18 266.685 121.487   1
  -2  -8 -19 240.398 94.2598   1
   9   8 -20 646.886 138.036  -2
  -2  -8 -20 646.886 138.036   1
   2  -9 -19 278.940 98.7974   1
   4   9 -18-6.89777 121.478  -2
   2  -9 -18-6.89777 121.478   1
   4   9 -17 153.215 117.449  -2
   2  -9 -17 153.215 117.449   1
   2  -9 -16 34.2182 80.7888   1
   3   9 -15 736.048 114.434  -2
   2  -9 -15 736.048 114.434   1
   3   9 -14 39.6882 98.4900  -2
   2  -9 -14 39.6882 98.4900   1
   2  -9 -13 246.114 73.0700   1
   2   9 -12 18.9353 92.0225  -2
   2  -9 -12 18.9353 92.0225   1
   2   9 -11 1661.60 55.7067  -2
   2  -9 -11 1661.60 55.7067   1
  -2   9  10 9.55732 27.5910   1
   1   9  -9 2082.05 48.0932  -2
   2  -9  -9 2082.05 48.0932   1
   2  -9  -8-2.97289 21.8121   1
   2  -9  -7 1929.17 37.3394   1
   0   9  -6 39.4538 27.3555  -2
   2  -9  -6 39.4538 27.3555   1
   2  -9  -5 509.319 25.5582   1
  -2   9   4 20.3100 20.4855   1
  -1   9  -3 620.395 31.6583  -2
   2  -9  -3 620.395 31.6583   1
   2  -9  -2 30.2096 20.2491   1
   2  -9  -1 403.491 24.7602   1
   2   9   0 30.9518 21.8575  -2
  -2  -9   0 30.9518 21.8575   1
  -2  -9  -1 1377.94 23.8947   1
  -2  -9  -2 9.08348 9.61546   1
  -3   9   3 4023.12 81.8618  -2
   2  -9   3 4023.12 81.8618   1
   2  -9   4 2.22739 30.6036   1
   2  -9   5 1308.86 45.7648   1
   4   9  -6 43.3999 45.4906  -2
  -2  -9  -6 43.3999 45.4906   1
  -2  -9  -7 508.113 41.3441   1
  -2  -9  -8 4.46084 49.9210   1
   5   9  -9 1513.88 95.3950  -2
  -2  -9  -9 1513.88 95.3950   1
  -2  -9 -10 49.8341 53.9074   1
   6   9 -11 552.641 83.9027  -2
  -2  -9 -11 552.641 83.9027   1
   6   9 -12 97.7677 83.6865  -2
  -2  -9 -12 97.7677 83.6865   1
  -2  -9 -13 615.749 76.1788   1
   7   9 -14-28.6253 94.8703  -2
  -2  -9 -14-28.6253 94.8703   1
   7   9 -15 536.709 110.122  -2
  -2  -9 -15 536.709 110.122   1
  -2  -9 -16 12.2123 79.4357   1
   8   9 -17 632.124 126.725  -2
  -2  -9 -17 632.124 126.725   1
   8   9 -18 158.449 122.226  -2
  -2  -9 -18 158.449 122.226   1
  -2  -9 -19 14.4824 89.8609   1
   4  10 -18 444.598 131.165  -2
   2 -10 -18 444.598 131.165   1
   4  10 -17 543.761 128.764  -2
   2 -10 -17 543.761 128.764   1
   2 -10 -16 418.074 92.2289   1
   3  10 -15 235.102 114.611  -2
   2 -10 -15 235.102 114.611   1
   3  10 -14 483.686 111.412  -2
   2 -10 -14 483.686 111.412   1
   2 -10 -13 562.962 84.2590   1
   2  10 -12 538.062 101.624  -2
   2 -10 -12 538.062 101.624   1
   2  10 -11 647.906 97.0555  -2
   2 -10 -11 647.906 97.0555   1
   2 -10 -10 15.6495 64.6588   1
   1  10  -9 162.386 33.6126  -2
   2 -10  -9 162.386 33.6126   1
   2 -10  -8 2.56302 23.0142   1
   2 -10  -7 19.4860 22.2993   1
   0  10  -6 372.032 33.8802  -2
   2 -10  -6 372.032 33.8802   1
   2 -10  -5 89.8873 22.5671   1
   2 -10  -4 815.661 38.4820   1
  -1  10  -3 987.430 40.7809  -2
   2 -10  -3 987.430 40.7809   1
   2 -10  -2 881.927 28.9754   1
   2 -10  -1-3.96939 19.7563   1
   2  10   0 564.684 30.7708  -2
  -2 -10   0 564.684 30.7708   1
   2 -10   1 41.9273 15.0784   1
  -2 -10  -2 17.3258 11.2557   1
   3  10  -3 88.9091 43.0920  -2
  -2 -10  -3 88.9091 43.0920   1
  -2 -10  -4 186.053 33.1993   1
   2 -10   5 299.638 37.1603   1
  -4  10   6 1631.11 68.9396  -2
   2 -10   6 1631.11 68.9396   1
   2 -10   7 655.062 45.1607   1
  -2 -10  -8 1110.56 70.5556   1
  -5  10   8 888.939 86.2724  -2
   2 -10   8 888.939 86.2724   1
   5  10  -9 571.636 81.4489  -2
  -2 -10  -9 571.636 81.4489   1
  -2 -10 -10 375.782 64.4242   1
   6  10 -11 285.819 84.4267  -2
  -2 -10 -11 285.819 84.4267   1
   6  10 -12 296.308 91.8282  -2
  -2 -10 -12 296.308 91.8282   1
  -2 -10 -13 29.7018 67.5744   1
   7  10 -14 414.847 103.982  -2
  -2 -10 -14 414.847 103.982   1
   7  10 -15 276.139 107.683  -2
  -2 -10 -15 276.139 107.683   1
  -2 -10 -16 53.1920 80.3108   1
   8  10 -17 26.5540 118.335  -2
  -2 -10 -17 26.5540 118.335   1
   8  10 -18 260.043 128.546  -2
  -2 -10 -18 260.043 128.546   1
   4  11 -18 191.113 130.557  -2
   2 -11 -18 191.113 130.557   1
   4  11 -17 132.122 124.764  -2
   2 -11 -17 132.122 124.764   1
   2 -11 -16 38.9491 86.3870   1
   3  11 -15 50.8523 115.380  -2
   2 -11 -15 50.8523 115.380   1
   3  11 -14 316.273 113.061  -2
   2 -11 -14 316.273 113.061   1
   2 -11 -13 4.64581 75.8149   1
   2  11 -12 1086.96 113.896  -2
   2 -11 -12 1086.96 113.896   1
   2  11 -11 31.8255 93.9739  -2
   2 -11 -11 31.8255 93.9739   1
   2 -11 -10 816.638 81.8344   1
   1  11  -9 13.1969 46.0003  -2
   2 -11  -9 13.1969 46.0003   1
   2 -11  -8 1369.55 36.3761   1
   2 -11  -7 30.9125 23.9509   1
   0  11  -6 1988.75 50.4880  -2
   2 -11  -6 1988.75 50.4880   1
   2 -11  -5 2.28944 30.8888   1
  -2 -11   4 40.2857 23.2155   1
  -1  11  -3 23.3510 29.5275  -2
   2 -11  -3 23.3510 29.5275   1
   2 -11  -2 172.242 23.4773   1
   2 -11  -1 24.4866 18.8351   1
  -2  11   0 1029.95 37.3260  -2
   2 -11   0 1029.95 37.3260   1
   2 -11   1 50.2957 16.2013   1
  -2 -11  -2 1344.80 22.6313   1
  -3  11   3 78.2803 45.9711  -2
   2 -11   3 78.2803 45.9711   1
  -2 -11  -4 1392.26 49.8925   1
  -2 -11  -5-19.5746 47.8209   1
  -4  11   5 133.639 69.4412  -2
   2 -11   5 133.639 69.4412   1
   4  11  -6 542.661 58.0234  -2
  -2 -11  -6 542.661 58.0234   1
  -2 -11  -7 39.9573 38.1213   1
  -2 -11  -8 10.9793 56.0262   1
  -5  11   8 1011.27 92.2057  -2
   2 -11   8 1011.27 92.2057   1
  -5  11   9 12.5286 54.9383  -2
   2 -11   9 12.5286 54.9383   1
   2 -11  10 90.5989 43.5673   1
  -6  11  11 185.263 63.9529  -2
   2 -11  11 185.263 63.9529   1
   6  11 -12 761.616 102.163  -2
  -2 -11 -12 761.616 102.163   1
  -2 -11 -13 132.846 73.9665   1
   7  11 -14 779.675 113.039  -2
  -2 -11 -14 779.675 113.039   1
   7  11 -15 296.732 110.141  -2
  -2 -11 -15 296.732 110.141   1
  -2 -11 -16 381.739 91.4876   1
   8  11 -17 108.639 121.344  -2
  -2 -11 -17 108.639 121.344   1
   8  11 -18 596.369 135.091  -2
  -2 -11 -18 596.369 135.091   1
   4  12 -17 582.861 134.044  -2
   2 -12 -17 582.861 134.044   1
   2 -12 -16 142.983 90.8357   1
   3  12 -15 533.877 126.457  -2
   2 -12 -15 533.877 126.457   1
   3  12 -14 301.882 119.056  -2
   2 -12 -14 301.882 119.056   1
   2 -12 -13 586.217 92.7374   1
   2  12 -12 465.953 112.418  -2
   2 -12 -12 465.953 112.418   1
   2  12 -11 219.617 102.070  -2
   2 -12 -11 219.617 102.070   1
   2 -12 -10 261.488 76.6285   1
   1  12  -9 563.817 54.0869  -2
   2 -12  -9 563.817 54.0869   1
   2 -12  -8 7.48416 34.0237   1
   2 -12  -7 329.539 36.7886   1
   0  12   6 151.396 37.8324  -2
  -2 -12   6 151.396 37.8324   1
   2 -12  -5 850.282 42.9689   1
   0  12   5 1091.11 70.5605  -2
  -2 -12   5 1091.11 70.5605   1
   2 -12  -4 21.6043 24.8632   1
  -1  12  -3 1929.35 53.7380  -2
   2 -12  -3 1929.35 53.7380   1
   2 -12  -2 37.0636 22.9212   1
  -2 -12   1 1218.76 29.6614   1
  -2  12   0 112.541 21.0605  -2
   2 -12   0 112.541 21.0605   1
  -2 -12  -1 632.366 22.9748   1
   2 -12   2 10.8687 11.6255   1
   3  12  -3 329.951 51.5540  -2
  -2 -12  -3 329.951 51.5540   1
   2 -12   4 66.8726 37.2878   1
   2 -12   5 328.774 41.4819   1
   4  12  -6 239.904 56.7243  -2
  -2 -12  -6 239.904 56.7243   1
  -2 -12  -7 624.798 48.1999   1
  -2 -12  -8 288.810 67.7721   1
  -5  12   8 418.982 88.3908  -2
   2 -12   8 418.982 88.3908   1
  -5  12   9 872.320 71.6289  -2
   2 -12   9 872.320 71.6289   1
  -2 -12 -10 55.5627 45.3134   1
  -6  12  11 855.620 75.0418  -2
   2 -12  11 855.620 75.0418   1
  -6  12  12 22.3783 67.0907  -2
   2 -12  12 22.3783 67.0907   1
  -2 -12 -13 70.9570 51.5602   1
   7  12 -14 263.196 77.4626  -2
  -2 -12 -14 263.196 77.4626   1
  -7  12  15 338.746 80.5525  -2
   2 -12  15 338.746 80.5525   1
  -2 -12 -16 131.645 90.6168   1
   3  13 -15 406.362 127.275  -2
   2 -13 -15 406.362 127.275   1
   3  13 -14 188.013 124.459  -2
   2 -13 -14 188.013 124.459   1
   2 -13 -13 134.845 85.8276   1
   2  13 -12 19.6382 112.458  -2
   2 -13 -12 19.6382 112.458   1
   2  13 -11 496.350 117.806  -2
   2 -13 -11 496.350 117.806   1
   2 -13 -10 25.6728 77.0259   1
   1  13  -9 618.829 112.735  -2
   2 -13  -9 618.829 112.735   1
   2 -13  -8 138.529 73.2893   1
  -1  13   8 200.335 74.0062  -2
  -2 -13   8 200.335 74.0062   1
  -2 -13   7 506.953 47.1147   1
   0  13   6 277.193 41.1467  -2
  -2 -13   6 277.193 41.1467   1
   2 -13  -5 113.372 35.5588   1
   0  13   5 536.212 66.9058  -2
  -2 -13   5 536.212 66.9058   1
  -2 -13   4 14.6806 26.0195   1
   1  13   3 19.6290 34.6464  -2
  -2 -13   3 19.6290 34.6464   1
  -2 -13   2 64.7742 21.7999   1
   2 -13  -1 732.995 27.3647   1
  -2  13   0 92.6916 41.4104  -2
   2 -13   0 92.6916 41.4104   1
   2 -13   1 1069.80 47.3537   1
  -2 -13  -2 24.9026 35.1540   1
  -3  13   3 1201.78 68.2551  -2
   2 -13   3 1201.78 68.2551   1
  -2 -13  -4-1.69457 37.4873   1
  -2 -13  -5 444.897 45.3451   1
  -4  13   6 28.1249 57.4195  -2
   2 -13   6 28.1249 57.4195   1
   2 -13   7 107.316 44.7794   1
  -2 -13  -8 74.3327 64.2430   1
  -5  13   8 96.1466 89.9873  -2
   2 -13   8 96.1466 89.9873   1
   5  13  -9 638.074 71.7488  -2
  -2 -13  -9 638.074 71.7488   1
   2 -13  10 247.547 50.6584   1
  -6  13  11 479.196 73.8687  -2
   2 -13  11 479.196 73.8687   1
  -6  13  12 298.518 76.7684  -2
   2 -13  12 298.518 76.7684   1
   2 -13  13 588.521 63.3748   1
   7  13 -14 324.155 79.9585  -2
  -2 -13 -14 324.155 79.9585   1
   7  13 -15 456.841 125.245  -2
  -2 -13 -15 456.841 125.245   1
   3  14 -14 740.510 134.201  -2
   2 -14 -14 740.510 134.201   1
   2 -14 -13-32.2658 87.3130   1
   2  14 -12 321.880 120.471  -2
   2 -14 -12 321.880 120.471   1
   2  14 -11 51.6098 117.574  -2
   2 -14 -11 51.6098 117.574   1
  -2 -14  10 9.87175 47.5360   1
   1  14  -9 66.1379 63.7649  -2
   2 -14  -9 66.1379 63.7649   1
   2 -14  -8 287.335 84.7372   1
  -1  14   8 1074.64 90.0956  -2
  -2 -14   8 1074.64 90.0956   1
   2 -14  -7 28.5660 42.4838   1
   0  14   6 656.740 66.9804  -2
  -2 -14   6 656.740 66.9804   1
   2 -14  -5 69.1575 67.9499   1
   0  14   5 119.750 64.1991  -2
  -2 -14   5 119.750 64.1991   1
   2 -14  -4 1221.70 89.2518   1
   1  14   3 116.439 43.6240  -2
  -2 -14   3 116.439 43.6240   1
   2 -14  -2 1695.37 47.0474   1
   2 -14  -1 5.62699 30.8377   1
  -2  14   0 1761.75 66.3701  -2
   2 -14   0 1761.75 66.3701   1
  -2 -14  -1-0.46415 31.8725   1
  -2 -14  -2 124.635 39.5427   1
  -3  14   3 104.558 55.5525  -2
   2 -14   3 104.558 55.5525   1
  -2 -14  -4 31.8586 40.7391   1
   2 -14   5 32.1529 42.1701   1
  -4  14   6 1238.59 78.7375  -2
   2 -14   6 1238.59 78.7375   1
  -2 -14  -7 128.316 46.0342   1
  -2 -14  -8 503.784 75.8427   1
  -5  14   8 542.495 97.8345  -2
   2 -14   8 542.495 97.8345   1
   5  14  -9 69.7265 67.0441  -2
  -2 -14  -9 69.7265 67.0441   1
   2 -14  10 265.345 54.4848   1
  -6  14  11 173.355 74.4889  -2
   2 -14  11 173.355 74.4889   1
   6  14 -12 653.114 83.1007  -2
  -2 -14 -12 653.114 83.1007   1
   2 -14  13 48.7665 58.0244   1
  -2 -15  13 31.5722 80.0094   1
  -2  15  12 329.140 81.4884  -2
  -2 -15  12 329.140 81.4884   1
  -2  15  11 249.508 76.5770  -2
  -2 -15  11 249.508 76.5770   1
   2 -15 -10 287.160 92.5100   1
   1  15  -9 322.657 119.803  -2
   2 -15  -9 322.657 119.803   1
   2 -15  -8 328.752 85.9671   1
   2 -15  -7 167.582 81.4733   1
   0  15  -6 527.348 119.656  -2
   2 -15  -6 527.348 119.656   1
   2 -15  -5 53.2441 72.4380   1
   2 -15  -4 163.423 73.9728   1
   1  15   3-29.2422 62.5475  -2
  -2 -15   3-29.2422 62.5475   1
  -2 -15   2 17.6458 43.3054   1
  -2 -15   1 4.05365 43.3534   1
   2  15   0 355.857 67.8027  -2
  -2 -15   0 355.857 67.8027   1
  -2 -15  -1 68.5485 33.7824   1
   2 -15   2 348.599 37.9760   1
   3  15  -3 238.463 59.7639  -2
  -2 -15  -3 238.463 59.7639   1
  -2 -15  -4 120.976 44.3012   1
   2 -15   5 174.624 46.7083   1
  -4  15   6 28.1812 59.6786  -2
   2 -15   6 28.1812 59.6786   1
   2 -15   7 10.1520 47.7393   1
  -2 -15  -8 5.09557 71.3747   1
  -5  15   8 320.197 104.091  -2
   2 -15   8 320.197 104.091   1
   5  15  -9 160.316 72.8852  -2
  -2 -15  -9 160.316 72.8852   1
   2 -15  10 65.4047 54.4282   1
  -6  15  11 145.834 108.344  -2
   2 -15  11 145.834 108.344   1
   2 -16 -10-20.3212 82.4432   1
   1  16  -9 776.465 134.471  -2
   2 -16  -9 776.465 134.471   1
   2 -16  -8 1.61444 84.5644   1
   2 -16  -7 242.184 89.1662   1
   0  16  -6 20.7820 114.164  -2
   2 -16  -6 20.7820 114.164   1
   2 -16  -5 724.177 96.4144   1
   2 -16  -4 1.21799 50.2847   1
  -1  16  -3 1522.47 93.4938  -2
   2 -16  -3 1522.47 93.4938   1
  -2 -16   2 35.5387 49.9701   1
  -2 -16   1 944.403 61.7518   1
   2  16   0 53.3321 51.9207  -2
  -2 -16   0 53.3321 51.9207   1
   2 -16   1 340.846 53.7260   1
  -2 -16  -2-0.37617 50.3507   1
  -3  16   3 154.368 72.9753  -2
   2 -16   3 154.368 72.9753   1
  -2 -16  -4 20.4294 69.3338   1
  -2 -16  -5 155.995 74.6740   1
   4  16  -6 17.9153 79.3305  -2
  -2 -16  -6 17.9153 79.3305   1
   2 -16   7 259.930 77.2542   1
  -5  16   8 50.0966 104.609  -2
   2 -16   8 50.0966 104.609   1
  -5  16   9 259.579 113.909  -2
   2 -16   9 259.579 113.909   1
   2 -16  10-20.5291 87.3691   1
   2 -17  -7 75.5084 88.3587   1
  -2 -17   6 163.380 77.6138   1
   0  17  -6 342.414 125.926  -2
   2 -17  -6 342.414 125.926   1
  -2 -17   5 50.3585 54.6289   1
   2 -17  -4 49.7683 53.2091   1
  -1  17  -3 105.480 113.022  -2
   2 -17  -3 105.480 113.022   1
   2 -17  -2 113.573 83.0743   1
   2 -17  -1-14.6590 79.3806   1
  -2  17   0 239.462 111.921  -2
   2 -17   0 239.462 111.921   1
   2 -17   1 56.9386 78.5754   1
   2 -17   2 243.189 80.5489   1
  -3  17   3 215.776 113.761  -2
   2 -17   3 215.776 113.761   1
   2 -17   4 238.064 81.0720   1
   3   0 -22 141.971 92.6443   1
   4   0 -20 646.629 127.357  -2
   3   0 -20 646.629 127.357   1
   3   0 -18-0.77462 103.997  -2
   3   0 -18-0.77462 103.997   1
   3   0 -16 179.311 70.4083   1
   2   0 -14 2207.08 112.073  -2
   3   0 -14 2207.08 112.073   1
   1   0 -12 2585.36 103.559  -2
   3   0 -12 2585.36 103.559   1
   3   0 -10 3185.53 85.9878   1
   3   0  -8 2860.26 75.6279   1
  -1   0  -6 7122.11 75.6230  -2
   3   0  -6 7122.11 75.6230   1
   3   0  -4 265.808 19.3892   1
  -3   0   2 2525.56 23.2314   1
  -3   0   0 5480.30 80.2705  -2
   3   0   0 5480.30 80.2705   1
   3   0   2 833.734 26.3504   1
   3   0   4 3459.76 43.0909   1
  -5   0   6 265.771 43.4834  -2
   3   0   6 265.771 43.4834   1
  -3   0  -8 1.70985 29.3610   1
  -3   0 -10 307.178 52.6054   1
   7   0 -12 1215.91 92.8598  -2
  -3   0 -12 1215.91 92.8598   1
   8   0 -14 1011.36 99.4143  -2
  -3   0 -14 1011.36 99.4143   1
  -3   0 -16 27.0822 68.2586   1
   9   0 -18 390.289 114.064  -2
  -3   0 -18 390.289 114.064   1
  10   0 -20 545.021 132.083  -2
  -3   0 -20 545.021 132.083   1
   3  -1 -22 57.2138 65.6392   1
   4   1 -21 470.909 87.4717  -2
   3  -1 -21 470.909 87.4717   1
   4  -1 -20 575.192 89.9431  -2
   3   1 -20 575.192 89.9431   1
   3   1 -19 327.573 60.4143   1
   3  -1 -18 1247.58 84.3604  -2
   3   1 -18 1247.58 84.3604   1
   3  -1 -17 1084.41 79.9479  -2
   3   1 -17 1084.41 79.9479   1
   3  -1 -16 932.353 60.1002   1
   2   1 -15 349.783 65.3247  -2
   3  -1 -15 349.783 65.3247   1
   2   1 -14 853.199 66.3310  -2
   3  -1 -14 853.199 66.3310   1
   3   1 -13 511.240 46.5628   1
   1   1 -12 2408.89 70.9555  -2
   3  -1 -12 2408.89 70.9555   1
   1   1 -11 1800.02 63.1613  -2
   3  -1 -11 1800.02 63.1613   1
   3  -1 -10 771.345 27.4473   1
   0   1   9 879.606 39.3138  -2
  -3  -1   9 879.606 39.3138   1
   3   1  -8 55.7760 24.3883   1
   3  -1  -7 705.389 24.5911   1
  -1  -1  -6 1007.97 29.4547  -2
   3   1  -6 1007.97 29.4547   1
  -3  -1   5 2010.42 25.5466   1
   3   1  -4 948.647 17.5529   1
  -2   1  -3 3220.01 28.4076  -2
   3  -1  -3 3220.01 28.4076   1
   3  -1  -2 761.134 13.1005   1
   3   1  -1 57.9372 20.3340   1
  -3   1   0 119.800 20.4478  -2
   3  -1   0 119.800 20.4478   1
   3   1   1 137.185 11.8701   1
   3   1   2 14.5439 12.1244   1
  -4   1   3 2820.06 29.8953  -2
   3  -1   3 2820.06 29.8953   1
   3   1   4 521.701 21.6598   1
   3   1   5 3534.90 34.0120   1
   5   1  -6 1781.01 39.7215  -2
  -3  -1  -6 1781.01 39.7215   1
  -3  -1  -7 1455.04 28.9395   1
  -3  -1  -8 618.780 25.3140   1
  -6   1   9 870.727 37.5317  -2
   3  -1   9 870.727 37.5317   1
  -3   1 -10 216.337 35.5033   1
  -3  -1 -11 320.835 57.0222   1
   7  -1 -11 788.469 85.3002  -2
  -3   1 -11 788.469 85.3002   1
   7  -1 -12 70.7116 54.2659  -2
  -3   1 -12 70.7116 54.2659   1
  -3   1 -13 12.5834 39.9677   1
   8  -1 -14 407.597 63.4353  -2
  -3   1 -14 407.597 63.4353   1
   8   1 -15 606.333 68.9319  -2
  -3  -1 -15 606.333 68.9319   1
  -3   1 -16 535.915 54.1159   1
   9  -1 -17 464.486 77.4257  -2
  -3   1 -17 464.486 77.4257   1
   9   1 -18 367.497 78.7626  -2
  -3  -1 -18 367.497 78.7626   1
  -3   1 -19 485.308 65.9069   1
  10   1 -20 726.025 93.6563  -2
  -3  -1 -20 726.025 93.6563   1
  10  -1 -21 490.400 91.0315  -2
  -3   1 -21 490.400 91.0315   1
   3   2 -22 68.9832 64.7801   1
   4   2 -21 811.487 93.1015  -2
   3  -2 -21 811.487 93.1015   1
   4  -2 -20 153.710 85.5672  -2
   3   2 -20 153.710 85.5672   1
   3   2 -19 218.085 58.8226   1
   3  -2 -18-31.3234 72.6031  -2
   3   2 -18-31.3234 72.6031   1
   3  -2 -17 69.8040 69.7310  -2
   3   2 -17 69.8040 69.7310   1
   3  -2 -16 18.1690 48.3901   1
   2  -2 -15 1214.26 72.7362  -2
   3   2 -15 1214.26 72.7362   1
   2   2 -14 135.407 57.7846  -2
   3  -2 -14 135.407 57.7846   1
   3  -2 -13 755.462 49.0108   1
   1   2 -12 80.8226 53.6155  -2
   3  -2 -12 80.8226 53.6155   1
  -3   2  11 2566.64 73.9913   1
   1  -2 -11 3178.68 71.2649  -2
   3   2 -11 3178.68 71.2649   1
   3   2 -10 301.760 24.0191   1
   0  -2  -9 3234.34 45.4265  -2
   3   2  -9 3234.34 45.4265   1
   3  -2  -8 86.3577 18.8719   1
   3   2  -7 1276.00 26.6880   1
  -1  -2  -6 27.2995 24.3378  -2
   3   2  -6 27.2995 24.3378   1
   3  -2  -5 335.734 18.4458   1
   3  -2  -4 55.1119 14.9313   1
  -2  -2  -3 427.272 16.6619  -2
   3   2  -3 427.272 16.6619   1
   3   2  -2 42.8840 9.39754   1
  -3  -2   1 4583.50 29.6487   1
   3   2   0 2504.92 25.6342  -2
  -3  -2   0 2504.92 25.6342   1
  -3  -2  -1 1205.41 10.9406   1
   3   2   2 135.536 11.1964   1
   4   2  -3 4967.83 38.0006  -2
  -3  -2  -3 4967.83 38.0006   1
  -3  -2  -4 66.0502 20.5073   1
   3   2   5 2231.67 37.8684   1
  -5  -2   6 343.183 37.1634  -2
   3   2   6 343.183 37.1634   1
   3   2   7 1.30600 21.6654   1
   3   2   8 873.026 27.1602   1
   6   2  -9 3292.14 58.9150  -2
  -3  -2  -9 3292.14 58.9150   1
  -3  -2 -10 160.101 37.5991   1
  -3  -2 -11 669.113 44.6630   1
   7   2 -12 108.870 53.7771  -2
  -3  -2 -12 108.870 53.7771   1
  -3  -2 -13 563.961 49.0671   1
   8  -2 -14 336.278 61.8693  -2
  -3   2 -14 336.278 61.8693   1
   8  -2 -15 1111.19 75.6059  -2
  -3   2 -15 1111.19 75.6059   1
  -3  -2 -16 53.4298 47.9659   1
   9   2 -17 439.928 75.9845  -2
  -3  -2 -17 439.928 75.9845   1
   9   2 -18 31.4385 76.2904  -2
  -3  -2 -18 31.4385 76.2904   1
  -3   2 -19 73.8629 59.5311   1
  10  -2 -20 78.1747 85.2080  -2
  -3   2 -20 78.1747 85.2080   1
  10   2 -21 495.283 92.7031  -2
  -3  -2 -21 495.283 92.7031   1
   3   3 -22 43.0664 64.4545   1
   3  -3 -21 54.6656 91.1780   1
   4  -3 -21 372.519 122.332  -2
   3   3 -21 372.519 122.332   1
   4  -3 -20 305.161 87.9985  -2
   3   3 -20 305.161 87.9985   1
   3  -3 -19 139.736 59.3934   1
   3   3 -18 1295.10 86.2425  -2
   3  -3 -18 1295.10 86.2425   1
   3   3 -17 488.717 74.7926  -2
   3  -3 -17 488.717 74.7926   1
   3   3 -16 837.126 59.5261   1
   2   3 -15 968.700 70.9965  -2
   3  -3 -15 968.700 70.9965   1
   2   3 -14 1088.25 68.5691  -2
   3  -3 -14 1088.25 68.5691   1
   3   3 -13 297.290 43.8376   1
   1   3 -12 884.070 60.3506  -2
   3  -3 -12 884.070 60.3506   1
   1   3 -11 820.642 42.3293  -2
   3  -3 -11 820.642 42.3293   1
  -3  -3  10 28.5831 21.7591   1
   0  -3  -9 66.2825 28.4041  -2
   3   3  -9 66.2825 28.4041   1
  -3   3   8 1686.06 27.3080   1
   3  -3  -7 3.24404 16.8519   1
  -1  -3  -6 1706.92 30.7796  -2
   3   3  -6 1706.92 30.7796   1
  -3  -3   5 1171.49 18.5525   1
   3  -3  -4 1620.32 20.3375   1
  -2   3  -3 310.813 20.0751  -2
   3  -3  -3 310.813 20.0751   1
   3  -3  -2 1986.42 19.6053   1
   3  -3  -1 228.374 10.4277   1
   3   3   0 2781.57 21.3048  -2
  -3  -3   0 2781.57 21.3048   1
   3   3   1 1732.79 11.5782   1
   3   3   2 251.637 9.91870   1
  -4  -3   3 815.418 20.0996  -2
   3   3   3 815.418 20.0996   1
   3   3   4 1249.92 28.6842   1
   3   3   5 349.620 24.6425   1
  -5  -3   6 3472.28 63.4027  -2
   3   3   6 3472.28 63.4027   1
  -3  -3  -7 395.647 29.4851   1
  -3  -3  -8 472.181 35.8015   1
  -6  -3   8 440.118 56.3633  -2
   3   3   8 440.118 56.3633   1
   6   3  -9 462.039 47.9363  -2
  -3  -3  -9 462.039 47.9363   1
  -3  -3 -10 266.529 52.7874   1
  -3  -3 -11 15.8289 56.5683   1
   7   3 -12 1154.56 66.3955  -2
  -3  -3 -12 1154.56 66.3955   1
  -3  -3 -13 40.0038 42.3577   1
   8   3 -14 236.363 63.1774  -2
  -3  -3 -14 236.363 63.1774   1
   8   3 -15 428.398 68.1634  -2
  -3  -3 -15 428.398 68.1634   1
  -3  -3 -16 794.900 60.4265   1
   9   3 -17 294.577 103.104  -2
  -3  -3 -17 294.577 103.104   1
   9   3 -18 810.679 118.954  -2
  -3  -3 -18 810.679 118.954   1
  -3  -3 -19 302.098 90.4647   1
  10   3 -20 630.054 135.318  -2
  -3  -3 -20 630.054 135.318   1
  10   3 -21 410.487 129.187  -2
  -3  -3 -21 410.487 129.187   1
   3  -4 -22 513.436 73.8219   1
   3  -4 -21 222.661 97.5279   1
   4  -4 -21 189.053 125.189  -2
   3   4 -21 189.053 125.189   1
   4  -4 -20 584.094 95.4830  -2
   3   4 -20 584.094 95.4830   1
   3  -4 -19 338.986 63.9200   1
   3   4 -18 163.298 78.5560  -2
   3  -4 -18 163.298 78.5560   1
   3  -4 -17 312.426 73.6360  -2
   3   4 -17 312.426 73.6360   1
   3   4 -16 52.1906 49.6067   1
   2  -4 -15 105.240 63.7444  -2
   3   4 -15 105.240 63.7444   1
   2  -4 -14 1809.87 76.7900  -2
   3   4 -14 1809.87 76.7900   1
   3  -4 -13 19.9634 40.5283   1
   1   4 -12 1020.13 63.8619  -2
   3  -4 -12 1020.13 63.8619   1
  -3   4  11 147.729 42.7276   1
   1  -4 -11 265.933 54.1583  -2
   3   4 -11 265.933 54.1583   1
   3  -4 -10 1756.86 35.2557   1
   0  -4   9 780.728 29.9157  -2
  -3   4   9 780.728 29.9157   1
  -3  -4   8 1177.09 24.7839   1
  -3   4   7 603.060 20.8717   1
  -1   4  -6 2914.16 36.9306  -2
   3  -4  -6 2914.16 36.9306   1
  -3   4   5 0.82911 16.6104   1
   3  -4  -4 836.178 20.7493   1
   2  -4   3 572.479 20.7805  -2
  -3   4   3 572.479 20.7805   1
   3  -4  -2 692.088 14.9356   1
   3  -4  -1 7.95074 16.0862   1
   3   4   0 8356.30 38.7133  -2
  -3  -4   0 8356.30 38.7133   1
  -3  -4  -1 57.1685 17.1799   1
   3  -4   2 3686.93 29.8414   1
  -4  -4   3 146.701 22.4818  -2
   3   4   3 146.701 22.4818   1
   3  -4   4 1764.36 19.0969   1
  -3  -4  -5 20.5701 21.6129   1
  -5  -4   6 854.803 41.2762  -2
   3   4   6 854.803 41.2762   1
   3   4   7 74.0614 25.7830   1
  -3  -4  -8 149.798 45.2866   1
  -6  -4   8 1504.46 67.6072  -2
   3   4   8 1504.46 67.6072   1
   6   4  -9 434.731 47.3777  -2
  -3  -4  -9 434.731 47.3777   1
  -3  -4 -10 757.888 61.9187   1
  -3  -4 -11 328.355 58.5804   1
   7   4 -12 936.164 86.4968  -2
  -3  -4 -12 936.164 86.4968   1
  -3  -4 -13 584.379 68.7605   1
   8   4 -14 1186.66 102.540  -2
  -3  -4 -14 1186.66 102.540   1
   8   4 -15 594.174 96.1079  -2
  -3  -4 -15 594.174 96.1079   1
  -3  -4 -16 315.873 76.4126   1
   9   4 -17 132.312 100.119  -2
  -3  -4 -17 132.312 100.119   1
   9   4 -18 485.221 113.852  -2
  -3  -4 -18 485.221 113.852   1
  -3  -4 -19 48.2016 82.0117   1
  10   4 -20 366.727 129.376  -2
  -3  -4 -20 366.727 129.376   1
  10   4 -21-27.9038 122.555  -2
  -3  -4 -21-27.9038 122.555   1
   3   5 -22 98.6460 96.7235   1
   3   5 -21 18.3581 90.5896   1
   4   5 -21 90.4353 131.541  -2
   3  -5 -21 90.4353 131.541   1
   4  -5 -20 67.6257 88.1735  -2
   3   5 -20 67.6257 88.1735   1
   3  -5 -19 290.332 63.9089   1
   3  -5 -18 222.657 77.2894  -2
   3   5 -18 222.657 77.2894   1
   3  -5 -17 836.812 80.9877  -2
   3   5 -17 836.812 80.9877   1
   3  -5 -16 185.702 51.7846   1
   2  -5 -15 1241.15 75.8603  -2
   3   5 -15 1241.15 75.8603   1
   2  -5 -14 595.324 66.4790  -2
   3   5 -14 595.324 66.4790   1
   3   5 -13 324.449 45.3601   1
   1  -5 -12 320.388 57.7474  -2
   3   5 -12 320.388 57.7474   1
   1   5 -11 519.449 55.2516  -2
   3  -5 -11 519.449 55.2516   1
   3  -5 -10 16.0074 21.9288   1
   0   5  -9 1749.31 35.9053  -2
   3  -5  -9 1749.31 35.9053   1
   3   5  -8 9.73561 17.3843   1
  -3  -5   7 1839.97 30.7083   1
   1   5   6 430.366 27.5635  -2
  -3  -5   6 430.366 27.5635   1
   3  -5  -5 2887.32 32.6015   1
   3  -5  -4 5.32092 16.3928   1
   2   5   3 4599.46 48.2347  -2
  -3  -5   3 4599.46 48.2347   1
   3  -5  -2 88.3754 15.9981   1
   3  -5  -1 2643.96 27.4636   1
  -3   5   0 36.9425 12.1843  -2
   3  -5   0 36.9425 12.1843   1
   3  -5   1 470.897 22.6424   1
   3  -5   2 462.418 24.9517   1
  -4   5   3 2872.43 43.1987  -2
   3  -5   3 2872.43 43.1987   1
   3  -5   4 622.941 21.9690   1
   3   5   5 738.687 11.5685   1
   5   5  -6 690.184 22.2506  -2
  -3  -5  -6 690.184 22.2506   1
   3   5   7 949.906 23.1261   1
  -3  -5  -8 212.771 20.1740   1
   6   5  -9 663.230 33.2969  -2
  -3  -5  -9 663.230 33.2969   1
   3   5  10 112.080 26.9852   1
  -3  -5 -11 43.8388 54.0924   1
  -7  -5  11 1410.33 61.6106  -2
   3   5  11 1410.33 61.6106   1
  -7  -5  12 77.9482 41.1124  -2
   3   5  12 77.9482 41.1124   1
  -3  -5 -13 54.7266 32.7616   1
   8   5 -14 89.9506 87.3539  -2
  -3  -5 -14 89.9506 87.3539   1
   8   5 -15 768.892 102.449  -2
  -3  -5 -15 768.892 102.449   1
  -3  -5 -16 143.798 70.3127   1
   9   5 -17 900.049 116.463  -2
  -3  -5 -17 900.049 116.463   1
   9   5 -18 234.684 110.910  -2
  -3  -5 -18 234.684 110.910   1
  -3  -5 -19 563.287 95.6271   1
  10   5 -20 186.817 122.709  -2
  -3  -5 -20 186.817 122.709   1
   4   6 -21 458.345 137.051  -2
   3  -6 -21 458.345 137.051   1
   4   6 -20 772.904 141.901  -2
   3  -6 -20 772.904 141.901   1
   3   6 -19 271.062 64.6522   1
   3   6 -18 671.575 86.7256  -2
   3  -6 -18 671.575 86.7256   1
   3  -6 -17 314.300 77.2375  -2
   3   6 -17 314.300 77.2375   1
   3  -6 -16 37.5762 49.0986   1
   2  -6 -15 993.551 76.0041  -2
   3   6 -15 993.551 76.0041   1
   2   6 -14 745.807 70.3911  -2
   3  -6 -14 745.807 70.3911   1
   3  -6 -13 477.705 49.0839   1
   1   6 -12 191.032 87.2827  -2
   3  -6 -12 191.032 87.2827   1
   1   6 -11 1147.63 91.8987  -2
   3  -6 -11 1147.63 91.8987   1
   3  -6 -10 144.100 27.4118   1
   0  -6   9 1672.73 39.8541  -2
  -3   6   9 1672.73 39.8541   1
   3  -6  -8 447.799 23.2975   1
   3  -6  -7 221.517 21.2771   1
  -1   6  -6 628.581 30.2508  -2
   3  -6  -6 628.581 30.2508   1
   3  -6  -5 148.758 18.2327   1
  -3  -6   4 15.6174 16.8824   1
   2  -6   3 526.326 26.8984  -2
  -3   6   3 526.326 26.8984   1
   3  -6  -2 6.26443 20.2145   1
  -3  -6   1 1666.20 25.5688   1
  -3   6   0 632.226 19.3470  -2
   3  -6   0 632.226 19.3470   1
  -3  -6  -1 2654.95 39.5932   1
   3  -6   2 555.136 27.5563   1
   4   6  -3 1243.68 45.9662  -2
  -3  -6  -3 1243.68 45.9662   1
  -3  -6  -4 5.74426 18.0187   1
   3  -6   5 389.603 22.5285   1
  -5  -6   6 392.724 38.4639  -2
   3   6   6 392.724 38.4639   1
  -3  -6  -7 27.0772 13.1352   1
  -3  -6  -8 304.856 30.6220   1
  -6  -6   8 352.066 31.2664  -2
   3   6   8 352.066 31.2664   1
   6   6  -9 1394.67 43.3216  -2
  -3  -6  -9 1394.67 43.3216   1
   3   6  10 397.477 29.0113   1
  -3  -6 -11 1455.28 75.0908   1
  -7  -6  11 1307.46 55.9047  -2
   3   6  11 1307.46 55.9047   1
   7   6 -12 1023.91 49.7648  -2
  -3  -6 -12 1023.91 49.7648   1
  -3  -6 -13 693.089 70.9749   1
   8   6 -14 802.839 95.5816  -2
  -3  -6 -14 802.839 95.5816   1
   8   6 -15 741.136 102.820  -2
  -3  -6 -15 741.136 102.820   1
  -3  -6 -16 313.396 76.6237   1
   9   6 -17 325.942 108.975  -2
  -3  -6 -17 325.942 108.975   1
   9   6 -18 185.608 116.835  -2
  -3  -6 -18 185.608 116.835   1
  -3  -6 -19-18.7232 86.6647   1
  10   6 -20 20.5769 120.107  -2
  -3  -6 -20 20.5769 120.107   1
   4   7 -20 252.089 129.744  -2
   3  -7 -20 252.089 129.744   1
   3  -7 -19-23.7773 88.9004   1
   3   7 -18 350.042 122.149  -2
   3  -7 -18 350.042 122.149   1
   3   7 -17-96.3473 109.366  -2
   3  -7 -17-96.3473 109.366   1
   3  -7 -16 747.937 89.8545   1
   2   7 -15 5.18039 98.0315  -2
   3  -7 -15 5.18039 98.0315   1
   2   7 -14 481.864 96.4029  -2
   3  -7 -14 481.864 96.4029   1
   3  -7 -13 15.9849 66.7181   1
   1   7 -12 745.766 94.9665  -2
   3  -7 -12 745.766 94.9665   1
   1   7 -11 193.056 84.1425  -2
   3  -7 -11 193.056 84.1425   1
   3  -7 -10 216.605 28.3406   1
   0   7  -9 92.8422 32.9680  -2
   3  -7  -9 92.8422 32.9680   1
  -3  -7   8 1269.78 30.2199   1
   3  -7  -7 18.4694 19.4888   1
  -1   7  -6 2552.63 44.4716  -2
   3  -7  -6 2552.63 44.4716   1
  -3   7   5 100.862 19.3992   1
   3  -7  -4 2985.82 35.0218   1
  -2   7  -3 32.8232 29.2939  -2
   3  -7  -3 32.8232 29.2939   1
   3  -7  -2 3521.86 43.7904   1
   3  -7  -1 15.5405 24.6605   1
  -3   7   0 2143.46 24.2286  -2
   3  -7   0 2143.46 24.2286   1
  -3  -7  -1 162.839 23.6113   1
  -3  -7  -2 16.5545 23.1145   1
   4   7  -3 3.83944 35.6309  -2
  -3  -7  -3 3.83944 35.6309   1
  -3  -7  -4 88.3482 27.8568   1
   3  -7   5-4.77116 20.6045   1
   5   7  -6 2507.23 52.5675  -2
  -3  -7  -6 2507.23 52.5675   1
   3   7   7 26.7200 7.56239   1
   3   7   8 589.093 35.9122   1
  -6  -7   8 810.405 25.6274  -2
   3   7   8 810.405 25.6274   1
   6   7  -9 8.61806 24.0914  -2
  -3  -7  -9 8.61806 24.0914   1
  -3  -7 -10 91.9955 22.5098   1
   7   7 -11 70.5205 33.5367  -2
  -3  -7 -11 70.5205 33.5367   1
   7   7 -12 1346.85 94.7725  -2
  -3  -7 -12 1346.85 94.7725   1
  -3  -7 -13 57.4837 59.9553   1
   8   7 -14 146.238 89.5368  -2
  -3  -7 -14 146.238 89.5368   1
   8   7 -15-16.0889 95.7940  -2
  -3  -7 -15-16.0889 95.7940   1
  -3  -7 -16 355.577 79.0745   1
   9   7 -17 64.3263 109.619  -2
  -3  -7 -17 64.3263 109.619   1
   9   7 -18 803.989 124.021  -2
  -3  -7 -18 803.989 124.021   1
  -3  -7 -19 48.7128 86.6561   1
  10   7 -20 409.101 126.454  -2
  -3  -7 -20 409.101 126.454   1
   4   8 -20 975.934 150.458  -2
   3  -8 -20 975.934 150.458   1
   3  -8 -19 366.004 97.1747   1
   3   8 -18 786.777 130.295  -2
   3  -8 -18 786.777 130.295   1
   3   8 -17 200.924 117.901  -2
   3  -8 -17 200.924 117.901   1
   3  -8 -16 51.2745 77.3023   1
   2   8 -15 616.749 111.360  -2
   3  -8 -15 616.749 111.360   1
   2   8 -14 1002.88 110.644  -2
   3  -8 -14 1002.88 110.644   1
   3  -8 -13 103.201 69.9179   1
   1   8 -12 410.873 94.0550  -2
   3  -8 -12 410.873 94.0550   1
   1   8 -11 325.957 87.3605  -2
   3  -8 -11 325.957 87.3605   1
  -3   8  10 490.144 29.9294   1
   0  -8   9 1018.25 42.4275  -2
  -3   8   9 1018.25 42.4275   1
   3  -8  -8 450.405 28.0923   1
   3  -8  -7 226.482 22.8131   1
  -1   8  -6 453.677 30.9806  -2
   3  -8  -6 453.677 30.9806   1
   3  -8  -5 21.0558 19.5075   1
   3  -8  -4 7.65059 18.1599   1
  -2   8  -3 219.053 32.4779  -2
   3  -8  -3 219.053 32.4779   1
   3  -8  -2 198.864 24.2584   1
  -3  -8   1 47.9181 18.0549   1
  -3   8   0 1511.38 23.1158  -2
   3  -8   0 1511.38 23.1158   1
   3  -8   1 493.355 29.3468   1
   3  -8   2 262.208 27.4120   1
  -4   8   3 20.1870 34.1194  -2
   3  -8   3 20.1870 34.1194   1
  -3  -8  -4 163.447 29.7241   1
  -3  -8  -5-14.7896 29.6635   1
  -5   8   6 30.5283 32.9064  -2
   3  -8   6 30.5283 32.9064   1
   3  -8   7 77.9463 25.4136   1
  -3  -8  -8 227.216 48.2263   1
   6   8  -9 911.222 81.7320  -2
  -3  -8  -9 911.222 81.7320   1
   3   8  10 1087.79 27.2119   1
   7   8 -11 919.061 86.7891  -2
  -3  -8 -11 919.061 86.7891   1
   7   8 -12 887.135 92.7552  -2
  -3  -8 -12 887.135 92.7552   1
  -3  -8 -13 632.675 74.4525   1
   8   8 -14 547.514 102.702  -2
  -3  -8 -14 547.514 102.702   1
   8   8 -15 245.060 101.474  -2
  -3  -8 -15 245.060 101.474   1
  -3  -8 -16 151.938 78.7550   1
   9   8 -17 100.376 114.968  -2
  -3  -8 -17 100.376 114.968   1
   9   8 -18 333.849 122.996  -2
  -3  -8 -18 333.849 122.996   1
  -3  -8 -19-3.96977 89.1369   1
   3  -9 -19 201.173 94.0659   1
   3   9 -18 78.0806 124.860  -2
   3  -9 -18 78.0806 124.860   1
   3   9 -17 660.120 129.831  -2
   3  -9 -17 660.120 129.831   1
   3  -9 -16 110.524 83.0918   1
   2   9 -15 779.925 115.006  -2
   3  -9 -15 779.925 115.006   1
   2   9 -14 78.2232 103.436  -2
   3  -9 -14 78.2232 103.436   1
   3  -9 -13 445.845 78.2786   1
   1   9 -12 158.363 94.8853  -2
   3  -9 -12 158.363 94.8853   1
   3  -9 -11 3.93476 45.9216   1
   1   9 -11 234.374 89.7661  -2
   3  -9 -11 234.374 89.7661   1
   3  -9 -10 7.54170 35.7272   1
   0  -9   9 1676.44 49.3392  -2
  -3   9   9 1676.44 49.3392   1
   3  -9  -8 8.16400 23.5866   1
  -3   9   7 1202.05 34.6794   1
  -1   9  -6 84.8009 28.7368  -2
   3  -9  -6 84.8009 28.7368   1
   3  -9  -5 2020.24 34.4503   1
  -3   9   4 53.3404 20.2019   1
   2  -9   3 3811.79 66.9448  -2
  -3   9   3 3811.79 66.9448   1
   3  -9  -2 8.60732 30.4818   1
   3  -9  -1 1399.11 26.6314   1
  -3   9   0 7.20791 13.8706  -2
   3  -9   0 7.20791 13.8706   1
   3  -9   1 67.0235 28.1629   1
   3  -9   2 29.3613 27.6398   1
   4   9  -3 874.100 52.7661  -2
  -3  -9  -3 874.100 52.7661   1
   3  -9   4 72.3974 30.6143   1
   3  -9   5 513.294 37.1290   1
  -5   9   6 39.9344 44.5716  -2
   3  -9   6 39.9344 44.5716   1
   3  -9   7 879.957 44.7925   1
  -3  -9  -8 38.8778 47.6893   1
  -6   9   8 34.0554 75.4735  -2
   3  -9   8 34.0554 75.4735   1
  -6   9   9 839.831 62.5582  -2
   3  -9   9 839.831 62.5582   1
  -3  -9 -10-38.0794 54.7515   1
  -3  -9 -11 93.6240 56.4039   1
   7   9 -12-44.1031 81.7394  -2
  -3  -9 -12-44.1031 81.7394   1
  -3  -9 -13 36.1371 64.3335   1
   8   9 -14 31.7419 95.8183  -2
  -3  -9 -14 31.7419 95.8183   1
   8   9 -15 235.669 103.494  -2
  -3  -9 -15 235.669 103.494   1
  -3  -9 -16 134.392 80.1648   1
   9   9 -17 839.073 126.395  -2
  -3  -9 -17 839.073 126.395   1
   9   9 -18 73.1853 120.873  -2
  -3  -9 -18 73.1853 120.873   1
  -3  -9 -19 556.654 99.9104   1
   3  10 -18 166.327 123.523  -2
   3 -10 -18 166.327 123.523   1
   3  10 -17 190.598 120.350  -2
   3 -10 -17 190.598 120.350   1
   3 -10 -16 92.7545 86.2151   1
   2  10 -15 315.509 116.303  -2
   3 -10 -15 315.509 116.303   1
   2  10 -14 435.173 112.117  -2
   3 -10 -14 435.173 112.117   1
   3 -10 -13 63.6133 72.3948   1
   1  10 -12 344.744 101.167  -2
   3 -10 -12 344.744 101.167   1
   3 -10 -11 190.606 50.8394   1
   1  10 -11 225.888 93.9333  -2
   3 -10 -11 225.888 93.9333   1
   3 -10 -10 551.144 42.8154   1
   0  10  -9 510.777 54.9595  -2
   3 -10  -9 510.777 54.9595   1
   3 -10  -8 395.532 29.3978   1
  -3  10   7 422.972 29.2716   1
  -1  10  -6 713.146 41.3060  -2
   3 -10  -6 713.146 41.3060   1
   3 -10  -5 22.1010 24.0257   1
   3 -10  -4 139.971 25.2044   1
  -2  10  -3 74.8545 43.7764  -2
   3 -10  -3 74.8545 43.7764   1
  -3 -10   2 506.746 24.9168   1
   3 -10  -1 131.514 17.5163   1
   3  10   0 730.866 25.6375  -2
  -3 -10   0 730.866 25.6375   1
   3 -10   1 113.094 29.0824   1
   3 -10   2 954.127 39.3735   1
   4  10  -3 44.6479 39.7052  -2
  -3 -10  -3 44.6479 39.7052   1
   3 -10   4 436.515 36.7682   1
  -3 -10  -5 4.80311 32.9960   1
   5  10  -6 280.391 51.1420  -2
  -3 -10  -6 280.391 51.1420   1
  -3 -10  -7 215.106 38.8964   1
  -3 -10  -8 68.9024 51.4572   1
  -6  10   8 405.616 84.8751  -2
   3 -10   8 405.616 84.8751   1
  -6  10   9 337.263 58.0119  -2
   3 -10   9 337.263 58.0119   1
  -3 -10 -10 474.617 47.9502   1
  -3 -10 -11 317.498 64.0338   1
  -7  10  11 442.263 94.7681  -2
   3 -10  11 442.263 94.7681   1
   7  10 -12 514.075 92.4650  -2
  -3 -10 -12 514.075 92.4650   1
  -3 -10 -13 338.442 73.6190   1
   8  10 -14 828.457 124.766  -2
  -3 -10 -14 828.457 124.766   1
   8  10 -15 367.573 109.608  -2
  -3 -10 -15 367.573 109.608   1
  -3 -10 -16 60.5177 80.9189   1
   9  10 -17 249.829 121.874  -2
  -3 -10 -17 249.829 121.874   1
   9  10 -18 176.459 124.169  -2
  -3 -10 -18 176.459 124.169   1
   3  11 -17 80.1642 124.704  -2
   3 -11 -17 80.1642 124.704   1
   3 -11 -16 369.441 92.2088   1
   2  11 -15 87.3792 118.091  -2
   3 -11 -15 87.3792 118.091   1
   2  11 -14 521.511 117.968  -2
   3 -11 -14 521.511 117.968   1
   3 -11 -13 31.5605 75.8808   1
   1  11 -12 518.016 111.157  -2
   3 -11 -12 518.016 111.157   1
   3 -11 -11 5.14934 48.8819   1
   1  11 -11 51.8531 99.7126  -2
   3 -11 -11 51.8531 99.7126   1
   3 -11 -10 144.664 39.1185   1
   0  11  -9-22.6761 50.5037  -2
   3 -11  -9-22.6761 50.5037   1
   3 -11  -8 1039.21 48.6341   1
   3 -11  -7 1.64114 35.2371   1
  -1  11  -6 1199.12 63.3687  -2
   3 -11  -6 1199.12 63.3687   1
   3 -11  -5 9.18381 33.9970   1
   3 -11  -4 1686.97 52.4205   1
   2  11   3 60.7419 31.5836  -2
  -3 -11   3 60.7419 31.5836   1
   3 -11  -2 1733.80 35.6685   1
  -3 -11   1 68.6008 17.3719   1
   3  11   0 830.023 21.8883  -2
  -3 -11   0 830.023 21.8883   1
   3 -11   1 236.356 33.1949   1
  -3 -11  -2 78.5300 31.7171   1
   4  11  -3 125.486 46.0833  -2
  -3 -11  -3 125.486 46.0833   1
   3 -11   4 456.175 39.8617   1
  -3 -11  -5 231.061 51.6877   1
  -5  11   5 133.779 73.3937  -2
   3 -11   5 133.779 73.3937   1
  -5  11   6 1481.01 70.8460  -2
   3 -11   6 1481.01 70.8460   1
  -3 -11  -7 177.892 39.7048   1
  -3 -11  -8 1021.97 69.9692   1
  -6  11   8 1190.14 99.4107  -2
   3 -11   8 1190.14 99.4107   1
  -6  11   9 80.4032 57.4187  -2
   3 -11   9 80.4032 57.4187   1
   3 -11  10 363.252 49.1474   1
   7  11 -11 24.9914 62.6885  -2
  -3 -11 -11 24.9914 62.6885   1
   7  11 -12 538.747 72.6886  -2
  -3 -11 -12 538.747 72.6886   1
   3 -11  13 46.7123 50.1624   1
  -8  11  14 84.8981 72.6089  -2
   3 -11  14 84.8981 72.6089   1
   8  11 -15 5.43926 75.0417  -2
  -3 -11 -15 5.43926 75.0417   1
  -3 -11 -16 176.387 88.9078   1
   9  11 -17-16.4934 123.931  -2
  -3 -11 -17-16.4934 123.931   1
   3 -12 -16 54.9966 86.4853   1
   2  12 -15 459.568 126.298  -2
   3 -12 -15 459.568 126.298   1
   2  12 -14 218.838 118.589  -2
   3 -12 -14 218.838 118.589   1
   3 -12 -13 405.343 90.9795   1
   1  12 -12 55.2212 110.552  -2
   3 -12 -12 55.2212 110.552   1
   1  12 -11 980.781 120.707  -2
   3 -12 -11 980.781 120.707   1
   3 -12 -10 158.288 41.3108   1
   0  12  -9 1089.26 63.6925  -2
   3 -12  -9 1089.26 63.6925   1
   3 -12  -8 72.9897 38.4193   1
   3 -12  -7 745.336 46.1894   1
  -1  12  -6 148.896 48.7809  -2
   3 -12  -6 148.896 48.7809   1
   3 -12  -5 141.716 36.9407   1
   1  12   5 1216.68 68.6865  -2
  -3 -12   5 1216.68 68.6865   1
   3 -12  -4 3.34483 25.0424   1
  -2  12  -3 307.835 36.9385  -2
   3 -12  -3 307.835 36.9385   1
  -3 -12   2 8.90472 19.9356   1
   3 -12  -1 750.900 23.9297   1
   3  12   0 22.5689 14.4528  -2
  -3 -12   0 22.5689 14.4528   1
  -3 -12  -1 846.088 43.3110   1
  -3 -12  -2 84.0740 33.3819   1
  -4  12   3 1291.46 67.7348  -2
   3 -12   3 1291.46 67.7348   1
   3 -12   4 59.9049 36.3442   1
  -3 -12  -5 417.588 57.8117   1
  -5  12   5 857.356 90.0916  -2
   3 -12   5 857.356 90.0916   1
  -5  12   6 75.2159 54.1523  -2
   3 -12   6 75.2159 54.1523   1
   3 -12   7 61.8708 40.7897   1
  -3 -12  -8 191.058 59.7170   1
  -6  12   8 415.248 91.2651  -2
   3 -12   8 415.248 91.2651   1
  -6  12   9 1239.33 75.3144  -2
   3 -12   9 1239.33 75.3144   1
   3 -12  10 153.534 48.9367   1
   7  12 -11 436.298 71.2476  -2
  -3 -12 -11 436.298 71.2476   1
   7  12 -12 318.861 73.2306  -2
  -3 -12 -12 318.861 73.2306   1
  -3 -12 -13 441.736 59.2308   1
  -8  12  14 116.109 76.2900  -2
   3 -12  14 116.109 76.2900   1
   8  12 -15 349.313 119.087  -2
  -3 -12 -15 349.313 119.087   1
   2  13 -15 405.979 131.408  -2
   3 -13 -15 405.979 131.408   1
   2  13 -14 244.992 125.933  -2
   3 -13 -14 244.992 125.933   1
   3 -13 -13 277.704 89.2718   1
   1  13 -12 700.520 125.555  -2
   3 -13 -12 700.520 125.555   1
   1  13 -11 423.747 116.216  -2
   3 -13 -11 423.747 116.216   1
   3 -13 -10 147.729 82.4367   1
   0  13  -9 237.255 111.724  -2
   3 -13  -9 237.255 111.724   1
   3 -13  -8 75.5145 39.5015   1
   3 -13  -7 361.620 33.9472   1
  -1  13  -6 151.826 40.7129  -2
   3 -13  -6 151.826 40.7129   1
   3 -13  -5 674.789 45.7250   1
   1  13   5 1042.27 69.0922  -2
  -3 -13   5 1042.27 69.0922   1
   3 -13  -4 5.03773 26.1515   1
   2  13   3 1159.33 43.0358  -2
  -3 -13   3 1159.33 43.0358   1
   3 -13  -2 25.7844 28.9912   1
   3 -13  -1 116.824 30.4403   1
  -3  13   0 236.913 44.3980  -2
   3 -13   0 236.913 44.3980   1
  -3 -13  -1 32.3235 34.8765   1
  -3 -13  -2 106.118 37.5585   1
   4  13  -3 531.410 59.4859  -2
  -3 -13  -3 531.410 59.4859   1
  -3 -13  -4 147.127 39.9350   1
   3 -13   5 684.465 48.8416   1
   5  13  -6 201.428 59.4978  -2
  -3 -13  -6 201.428 59.4978   1
  -3 -13  -7 692.144 52.6259   1
  -3 -13  -8 332.149 65.9414   1
  -6  13   8 272.219 94.8340  -2
   3 -13   8 272.219 94.8340   1
   6  13  -9 540.555 70.2597  -2
  -3 -13  -9 540.555 70.2597   1
   3 -13  10 13.6432 48.7713   1
  -3 -13 -11 134.561 70.5990   1
  -7  13  11 825.310 113.234  -2
   3 -13  11 825.310 113.234   1
   7  13 -12-19.0612 71.0869  -2
  -3 -13 -12-19.0612 71.0869   1
   3 -13  13-5.22109 54.6991   1
   3 -14 -13-21.2878 87.3837   1
   1  14 -12 765.138 129.898  -2
   3 -14 -12 765.138 129.898   1
   1  14 -11 19.1399 116.646  -2
   3 -14 -11 19.1399 116.646   1
   3 -14 -10 744.519 96.7637   1
   0  14   9 82.3682 63.7237  -2
  -3 -14   9 82.3682 63.7237   1
   3 -14  -8 595.256 91.3277   1
   0  14   8 648.047 80.5701  -2
  -3 -14   8 648.047 80.5701   1
  -3 -14   7 12.1767 41.4471   1
  -1  14  -6 1130.94 125.203  -2
   3 -14  -6 1130.94 125.203   1
   3 -14  -5 18.0168 39.9631   1
   3 -14  -4 64.0232 40.2217   1
  -2  14  -3 97.5057 44.2665  -2
   3 -14  -3 97.5057 44.2665   1
   3 -14  -2 634.279 38.4358   1
  -3 -14   1 35.9097 31.8976   1
   3  14   0 1872.69 60.1590  -2
  -3 -14   0 1872.69 60.1590   1
  -3 -14  -1 163.129 34.0026   1
   3 -14   2 1069.37 52.0785   1
   4  14  -3 168.939 51.8299  -2
  -3 -14  -3 168.939 51.8299   1
  -3 -14  -4 668.347 50.3474   1
  -3 -14  -5 12.2426 41.7277   1
   5  14  -6 511.816 68.5809  -2
  -3 -14  -6 511.816 68.5809   1
   3 -14   7 17.1034 45.7659   1
  -3 -14  -8 9.94161 63.1995   1
  -6  14   8 901.133 110.517  -2
   3 -14   8 901.133 110.517   1
   6  14  -9 20.1735 65.2152  -2
  -3 -14  -9 20.1735 65.2152   1
   3 -14  10 85.7693 71.7401   1
  -7  14  11 52.5140 108.559  -2
   3 -14  11 52.5140 108.559   1
  -7  14  12 319.246 111.126  -2
   3 -14  12 319.246 111.126   1
   1  15 -11 273.444 122.044  -2
   3 -15 -11 273.444 122.044   1
   3 -15 -10 29.5048 87.2797   1
   0  15  -9 48.7697 115.570  -2
   3 -15  -9 48.7697 115.570   1
   3 -15  -8 93.9712 81.9118   1
   3 -15  -7 1.98967 81.0006   1
  -1  15  -6 524.270 119.021  -2
   3 -15  -6 524.270 119.021   1
   3 -15  -5 40.9751 76.5430   1
   3 -15  -4 326.544 49.2577   1
   2  15   3 152.303 63.6986  -2
  -3 -15   3 152.303 63.6986   1
  -3 -15   2 153.545 46.9702   1
  -3 -15   1 34.0304 33.6263   1
  -3  15   0-6.12919 46.1198  -2
   3 -15   0-6.12919 46.1198   1
  -3 -15  -1 9.41756 34.5748   1
   3 -15   2 83.7462 36.2584   1
  -4  15   3 262.239 54.2284  -2
   3 -15   3 262.239 54.2284   1
  -3 -15  -4 111.213 44.6532   1
  -3 -15  -5 272.587 48.3913   1
  -5  15   6 472.996 62.1697  -2
   3 -15   6 472.996 62.1697   1
   3 -15   7 176.306 75.6103   1
  -6  15   8 141.754 104.904  -2
   3 -15   8 141.754 104.904   1
  -6  15   9 115.434 104.566  -2
   3 -15   9 115.434 104.566   1
   3 -15  10 109.480 76.0149   1
   0  16  -9 584.123 131.590  -2
   3 -16  -9 584.123 131.590   1
   3 -16  -8 55.0111 85.3294   1
   3 -16  -7 147.217 87.4640   1
  -1  16  -6 51.8042 117.787  -2
   3 -16  -6 51.8042 117.787   1
   3 -16  -5-10.6650 49.8606   1
   3 -16  -4 19.7257 48.8126   1
  -2  16  -3 177.832 113.622  -2
   3 -16  -3 177.832 113.622   1
   3 -16  -2-49.5888 79.2332   1
   3 -16  -1 512.458 90.0801   1
  -3  16   0 4.93384 109.821  -2
   3 -16   0 4.93384 109.821   1
   3 -16   1 674.816 91.4794   1
   3 -16   2 5.03477 78.5513   1
  -4  16   3 1090.17 136.537  -2
   3 -16   3 1090.17 136.537   1
   3 -16   4-11.8101 63.5226   1
   3 -16   5 279.293 73.4531   1
  -5  16   6-58.6304 96.2402  -2
   3 -16   6-58.6304 96.2402   1
   3 -16   7 27.1323 73.4766   1
  -6  16   8 55.3947 109.643  -2
   3 -16   8 55.3947 109.643   1
  -6  16   9 673.337 124.650  -2
   3 -16   9 673.337 124.650   1
   3 -17  -5 95.7939 88.2019   1
   3 -17  -4 110.815 81.9486   1
  -2  17  -3 183.927 118.951  -2
   3 -17  -3 183.927 118.951   1
   3 -17  -2 40.3379 77.2028   1
   3 -17  -1-4.45749 77.7599   1
  -3  17   0 8.17146 78.9247  -2
   3 -17   0 8.17146 78.9247   1
   3 -17   1-51.4762 78.2683   1
   3 -17   2-32.5960 82.0328   1
   4   0 -22 26.0331 89.8393   1
   3   0 -20 621.531 128.911  -2
   4   0 -20 621.531 128.911   1
   2   0 -18 788.849 113.386  -2
   4   0 -18 788.849 113.386   1
   4   0 -16 684.801 78.9812   1
   1   0 -14 120.437 85.3939  -2
   4   0 -14 120.437 85.3939   1
   0   0 -12 1042.42 90.0633  -2
   4   0 -12 1042.42 90.0633   1
   4   0 -10 1535.71 46.5258   1
   4   0  -8 4814.81 61.0474   1
  -2   0  -6 6012.76 56.4691  -2
   4   0  -6 6012.76 56.4691   1
   4   0  -4 2349.70 29.1748   1
   4   0  -2 1079.60 25.4291   1
  -4   0   0 408.115 47.9174  -2
   4   0   0 408.115 47.9174   1
  -4   0  -2 905.033 22.2683   1
   4   0   4 2425.30 41.0814   1
  -6   0   6 4169.93 72.0232  -2
   4   0   6 4169.93 72.0232   1
   4   0   8 1057.98 40.8472   1
  -4   0 -10 54.6026 47.4136   1
   8   0 -12 1856.14 97.6287  -2
  -4   0 -12 1856.14 97.6287   1
   9   0 -14 893.028 95.8947  -2
  -4   0 -14 893.028 95.8947   1
  -4   0 -16 624.504 80.4119   1
  10   0 -18 775.833 118.981  -2
  -4   0 -18 775.833 118.981   1
  11   0 -20 262.193 126.647  -2
  -4   0 -20 262.193 126.647   1
   4   1 -22 566.570 72.4123   1
   3  -1 -21 607.291 91.4723  -2
   4   1 -21 607.291 91.4723   1
   3   1 -20 503.601 88.3556  -2
   4  -1 -20 503.601 88.3556   1
   4   1 -19 260.502 60.0674   1
   2   1 -18 1213.41 83.4413  -2
   4  -1 -18 1213.41 83.4413   1
   2   1 -17 286.898 70.9963  -2
   4  -1 -17 286.898 70.9963   1
   4  -1 -16 18.4277 47.0730   1
   1   1 -15 930.882 70.7471  -2
   4  -1 -15 930.882 70.7471   1
   1  -1 -14 1015.47 69.0585  -2
   4   1 -14 1015.47 69.0585   1
   4  -1 -13 455.340 46.6305   1
   0   1 -12 769.095 59.8834  -2
   4  -1 -12 769.095 59.8834   1
   0  -1 -11 509.738 53.5051  -2
   4   1 -11 509.738 53.5051   1
   4   1 -10 722.529 27.0596   1
   1  -1   9 1800.94 44.3127  -2
  -4   1   9 1800.94 44.3127   1
  -4   1   8 1272.81 25.8214   1
  -4   1   7 231.339 18.2112   1
  -2   1  -6 333.624 22.0291  -2
   4  -1  -6 333.624 22.0291   1
   4   1  -5 511.005 15.5729   1
   4   1  -4 17.6454 12.0061   1
   3  -1   3 2851.01 25.2963  -2
  -4   1   3 2851.01 25.2963   1
   4  -1  -2 206.669 10.0176   1
   4   1  -1 5359.90 26.2266   1
  -4   1   0 19.3581 18.5634  -2
   4  -1   0 19.3581 18.5634   1
   4   1   1 1062.04 17.0828   1
   4   1   2 43.3356 15.5849   1
   5   1  -3 1825.26 28.1502  -2
  -4  -1  -3 1825.26 28.1502   1
  -4  -1  -4 58.9694 14.6490   1
   4   1   5 110.270 17.4079   1
   6   1  -6 874.036 37.6892  -2
  -4  -1  -6 874.036 37.6892   1
  -4  -1  -7 305.383 22.1529   1
   4  -1   8 730.040 26.7400   1
   7   1  -9 1660.77 51.4112  -2
  -4  -1  -9 1660.77 51.4112   1
  -4  -1 -10 1246.49 47.7555   1
  -4   1 -11 578.445 43.7822   1
   8  -1 -12 750.738 63.3920  -2
  -4   1 -12 750.738 63.3920   1
  -4   1 -13 768.492 51.3079   1
   9  -1 -14 557.519 65.5038  -2
  -4   1 -14 557.519 65.5038   1
   9   1 -15 592.473 70.1909  -2
  -4  -1 -15 592.473 70.1909   1
  -4  -1 -16 144.530 51.2815   1
  10  -1 -17 174.933 74.8011  -2
  -4   1 -17 174.933 74.8011   1
  10   1 -18 160.815 78.1561  -2
  -4  -1 -18 160.815 78.1561   1
  -4  -1 -19 41.9844 61.1284   1
  11   1 -20 106.281 86.8021  -2
  -4  -1 -20 106.281 86.8021   1
  11   1 -21 304.952 129.073  -2
  -4  -1 -21 304.952 129.073   1
   4  -2 -22 82.2457 65.2506   1
   3  -2 -21 721.829 92.8090  -2
   4   2 -21 721.829 92.8090   1
   3   2 -20 128.094 83.3609  -2
   4  -2 -20 128.094 83.3609   1
   4  -2 -19 259.325 59.0218   1
   2  -2 -18 184.717 72.6586  -2
   4   2 -18 184.717 72.6586   1
   2  -2 -17 1223.82 82.8422  -2
   4   2 -17 1223.82 82.8422   1
   4  -2 -16 18.0583 48.0608   1
   1   2 -15 943.905 69.5990  -2
   4  -2 -15 943.905 69.5990   1
   1   2 -14 408.649 62.1923  -2
   4  -2 -14 408.649 62.1923   1
   4  -2 -13-22.5604 40.1925   1
   0  -2 -12 109.343 52.1702  -2
   4   2 -12 109.343 52.1702   1
   4   2 -11 897.915 42.9972   1
   0   2 -11 2266.32 95.3202  -2
   4  -2 -11 2266.32 95.3202   1
   4  -2 -10 0.06500 19.0338   1
  -1  -2  -9 1427.01 33.2521  -2
   4   2  -9 1427.01 33.2521   1
   4  -2  -8 112.484 20.5139   1
   4   2  -7 3042.55 35.1199   1
  -2   2  -6 1045.45 29.9504  -2
   4  -2  -6 1045.45 29.9504   1
   4  -2  -5 4899.13 31.7954   1
   4   2  -4-3.17085 11.5946   1
   3   2   3 4948.50 30.7785  -2
  -4  -2   3 4948.50 30.7785   1
   4   2  -2 29.4375 7.73193   1
   4  -2  -1 494.344 17.6966   1
  -4  -2   0 14.7071 16.3400  -2
   4   2   0 14.7071 16.3400   1
   4  -2   1 79.2304 9.81973   1
   4   2   2 99.4002 11.3582   1
  -5  -2   3 7007.29 47.0209  -2
   4   2   3 7007.29 47.0209   1
  -4  -2  -4 477.273 16.3097   1
   4   2   5 1681.14 23.3666   1
  -6  -2   6 195.001 29.9039  -2
   4   2   6 195.001 29.9039   1
   4  -2   7 753.711 28.5207   1
  -4  -2  -8-6.72056 24.7630   1
  -7  -2   9 772.722 51.6159  -2
   4   2   9 772.722 51.6159   1
  -4  -2 -10 216.519 50.6021   1
  -4  -2 -11 29.0852 37.6860   1
   8  -2 -12 75.6328 54.0149  -2
  -4   2 -12 75.6328 54.0149   1
  -4  -2 -13 313.714 45.7122   1
   9   2 -14 76.6239 61.8289  -2
  -4  -2 -14 76.6239 61.8289   1
   9   2 -15 537.836 69.3995  -2
  -4  -2 -15 537.836 69.3995   1
  -4   2 -16 112.268 50.2935   1
  10   2 -17 1536.63 125.620  -2
  -4  -2 -17 1536.63 125.620   1
  10   2 -18 129.384 110.599  -2
  -4  -2 -18 129.384 110.599   1
  -4  -2 -19 329.369 89.1641   1
  11   2 -20 106.398 121.480  -2
  -4  -2 -20 106.398 121.480   1
  11   2 -21 433.486 129.100  -2
  -4  -2 -21 433.486 129.100   1
   4   3 -22 375.851 70.2968   1
   3   3 -21 251.372 87.6146  -2
   4  -3 -21 251.372 87.6146   1
   3  -3 -20 313.708 87.0158  -2
   4   3 -20 313.708 87.0158   1
   4  -3 -19 165.024 59.3023   1
   2  -3 -18 326.783 77.4352  -2
   4   3 -18 326.783 77.4352   1
   2  -3 -17 201.622 71.2119  -2
   4   3 -17 201.622 71.2119   1
   4   3 -16 343.589 52.4519   1
   1  -3 -15 604.783 67.9666  -2
   4   3 -15 604.783 67.9666   1
   1  -3 -14 1077.10 68.4050  -2
   4   3 -14 1077.10 68.4050   1
   4  -3 -13 14.7615 40.8280   1
   0  -3 -12 1714.32 69.0301  -2
   4   3 -12 1714.32 69.0301   1
   0  -3 -11 395.780 50.3246  -2
   4   3 -11 395.780 50.3246   1
  -4  -3  10 1154.03 27.6156   1
  -1   3  -9 1069.47 28.2402  -2
   4  -3  -9 1069.47 28.2402   1
   4  -3  -8 916.062 23.1754   1
  -4  -3   7 49.2923 15.7086   1
   2   3   6 483.520 24.1892  -2
  -4  -3   6 483.520 24.1892   1
  -4  -3   5 68.1536 14.7097   1
   4   3  -4 2208.07 21.8576   1
  -3   3  -3 650.064 17.3756  -2
   4  -3  -3 650.064 17.3756   1
   4  -3  -2 868.500 11.8683   1
   4   3  -1 1147.78 20.2189   1
  -4   3   0 3130.24 35.6866  -2
   4  -3   0 3130.24 35.6866   1
   4   3   1 242.759 7.24558   1
  -4  -3  -2 2643.56 20.2141   1
  -5   3   3 283.779 18.0719  -2
   4  -3   3 283.779 18.0719   1
   4  -3   4 195.118 13.6002   1
   4  -3   5 78.4370 13.9229   1
  -6  -3   6 768.410 34.9960  -2
   4   3   6 768.410 34.9960   1
   4   3   7 274.564 23.8358   1
  -4  -3  -8 445.915 46.7651   1
  -7  -3   8 1022.28 65.2763  -2
   4   3   8 1022.28 65.2763   1
   7   3  -9 727.622 51.3347  -2
  -4  -3  -9 727.622 51.3347   1
  -4  -3 -10 634.881 56.5534   1
  -4  -3 -11 434.554 57.5325   1
   8   3 -12 983.704 89.5312  -2
  -4  -3 -12 983.704 89.5312   1
  -4  -3 -13 290.092 58.8140   1
   9   3 -14 1197.85 101.271  -2
  -4  -3 -14 1197.85 101.271   1
   9   3 -15 439.166 93.9639  -2
  -4  -3 -15 439.166 93.9639   1
  -4  -3 -16-3.25281 66.6628   1
  10   3 -17 120.979 105.149  -2
  -4  -3 -17 120.979 105.149   1
  10   3 -18 260.679 111.720  -2
  -4  -3 -18 260.679 111.720   1
  -4  -3 -19-1.36680 84.4701   1
  11   3 -20 575.420 131.009  -2
  -4  -3 -20 575.420 131.009   1
   4  -4 -22 58.3550 66.9825   1
   3  -4 -21 302.841 91.0656  -2
   4   4 -21 302.841 91.0656   1
   3  -4 -20 569.720 93.4804  -2
   4   4 -20 569.720 93.4804   1
   4  -4 -19 275.600 62.4210   1
   2   4 -18 537.222 80.2943  -2
   4  -4 -18 537.222 80.2943   1
   2  -4 -17 522.239 74.5511  -2
   4   4 -17 522.239 74.5511   1
   4   4 -16 711.672 56.6756   1
   1   4 -15 217.546 65.3876  -2
   4  -4 -15 217.546 65.3876   1
   1   4 -14 620.456 65.3210  -2
   4  -4 -14 620.456 65.3210   1
   4   4 -13 236.434 44.0396   1
   0  -4 -12 280.266 56.7348  -2
   4   4 -12 280.266 56.7348   1
   0   4 -11 273.088 54.4149  -2
   4  -4 -11 273.088 54.4149   1
   4   4 -10 885.594 25.7517   1
  -1  -4  -9 260.270 24.5558  -2
   4   4  -9 260.270 24.5558   1
   4  -4  -8 2982.40 30.4290   1
  -4   4   7 23.3653 14.8268   1
  -2   4  -6 3516.08 35.2741  -2
   4  -4  -6 3516.08 35.2741   1
  -4  -4   5 115.613 13.7505   1
  -4  -4   4 1264.95 20.5126   1
   3   4   3 154.163 19.5215  -2
  -4  -4   3 154.163 19.5215   1
  -4  -4   2 2113.83 21.0078   1
   4  -4  -1 219.526 7.66533   1
   4   4   0 361.370 12.8326  -2
  -4  -4   0 361.370 12.8326   1
  -4  -4  -1 30.7860 7.39055   1
  -4  -4  -2 5.13416 8.26778   1
  -5   4   3 80.0682 14.0596  -2
   4  -4   3 80.0682 14.0596   1
   4  -4   4 3351.23 44.7961   1
   4   4   5 554.728 16.9282   1
  -6   4   6 2631.56 37.3437  -2
   4  -4   6 2631.56 37.3437   1
  -4  -4  -7 240.326 27.7720   1
  -4  -4  -8 569.979 47.6141   1
  -7  -4   8 854.145 62.8333  -2
   4   4   8 854.145 62.8333   1
   7   4  -9 142.452 43.7640  -2
  -4  -4  -9 142.452 43.7640   1
  -4  -4 -10 96.7760 50.0012   1
  -4  -4 -11 7.37799 48.6791   1
   8   4 -12 1017.74 86.6181  -2
  -4  -4 -12 1017.74 86.6181   1
  -4  -4 -13 92.4418 55.3051   1
   9   4 -14 263.351 83.5818  -2
  -4  -4 -14 263.351 83.5818   1
   9   4 -15 214.929 89.9067  -2
  -4  -4 -15 214.929 89.9067   1
  -4  -4 -16 368.552 75.9487   1
  10   4 -17 141.305 101.341  -2
  -4  -4 -17 141.305 101.341   1
  10   4 -18 657.339 116.124  -2
  -4  -4 -18 657.339 116.124   1
  -4  -4 -19 139.897 81.9642   1
  11   4 -20 362.090 124.894  -2
  -4  -4 -20 362.090 124.894   1
   4   5 -22 184.717 96.8134   1
   3   5 -21 271.780 91.5544  -2
   4  -5 -21 271.780 91.5544   1
   3  -5 -20 92.1605 84.4455  -2
   4   5 -20 92.1605 84.4455   1
   4  -5 -19 62.3590 59.7136   1
   2   5 -18 132.411 75.7812  -2
   4  -5 -18 132.411 75.7812   1
   2  -5 -17 207.297 72.7994  -2
   4   5 -17 207.297 72.7994   1
   4  -5 -16 3.83146 49.0163   1
   1  -5 -15 1252.59 75.4234  -2
   4   5 -15 1252.59 75.4234   1
   1   5 -14 111.427 61.3256  -2
   4  -5 -14 111.427 61.3256   1
   4   5 -13 881.541 51.5719   1
   0  -5 -12 257.284 56.0287  -2
   4   5 -12 257.284 56.0287   1
   0  -5 -11 1957.18 53.9361  -2
   4   5 -11 1957.18 53.9361   1
   4  -5 -10 113.166 24.0266   1
   1   5   9 1460.85 35.1221  -2
  -4  -5   9 1460.85 35.1221   1
  -4   5   8 2.16206 16.3495   1
  -4  -5   7 297.851 18.9816   1
   2   5   6 54.4356 22.0882  -2
  -4  -5   6 54.4356 22.0882   1
   4  -5  -5 296.078 16.6863   1
  -4   5   4 74.5835 14.0959   1
  -3   5  -3 2970.27 35.0439  -2
   4  -5  -3 2970.27 35.0439   1
   4  -5  -2 11.4965 12.2631   1
  -4  -5   1 3918.73 26.3941   1
   4   5   0 1444.66 23.7413  -2
  -4  -5   0 1444.66 23.7413   1
  -4  -5  -1 1675.65 29.5788   1
   4  -5   2 8.49058 18.8746   1
   5   5  -3 1753.26 34.5143  -2
  -4  -5  -3 1753.26 34.5143   1
   4   5   4 169.937 17.4317   1
  -4  -5  -5 361.373 12.9034   1
  -6   5   6 90.4833 18.2579  -2
   4  -5   6 90.4833 18.2579   1
   4   5   7 1.15375 15.4268   1
  -4  -5  -8 365.603 45.2835   1
  -7  -5   8 317.915 56.7366  -2
   4   5   8 317.915 56.7366   1
   7   5  -9 1640.87 60.3008  -2
  -4  -5  -9 1640.87 60.3008   1
  -4  -5 -10 976.441 62.8287   1
  -4  -5 -11 924.799 65.6712   1
   8   5 -12 259.776 78.8439  -2
  -4  -5 -12 259.776 78.8439   1
  -4  -5 -13 473.482 67.2456   1
   9   5 -14 228.056 88.4314  -2
  -4  -5 -14 228.056 88.4314   1
   9   5 -15 854.056 100.595  -2
  -4  -5 -15 854.056 100.595   1
  -4  -5 -16 16.8842 70.2998   1
  10   5 -17 78.8046 100.887  -2
  -4  -5 -17 78.8046 100.887   1
  10   5 -18-18.0288 109.107  -2
  -4  -5 -18-18.0288 109.107   1
  -4  -5 -19 210.869 88.1804   1
  11   5 -20-68.9225 120.321  -2
  -4  -5 -20-68.9225 120.321   1
   3  -6 -21 542.359 94.8150  -2
   4   6 -21 542.359 94.8150   1
   3  -6 -20 843.544 98.9005  -2
   4   6 -20 843.544 98.9005   1
   4   6 -19 449.463 66.3094   1
   2   6 -18 743.821 85.4610  -2
   4  -6 -18 743.821 85.4610   1
   2  -6 -17 833.463 84.0750  -2
   4   6 -17 833.463 84.0750   1
   4   6 -16 203.597 54.3025   1
   1   6 -15 917.590 76.0467  -2
   4  -6 -15 917.590 76.0467   1
   1   6 -14 209.917 63.7959  -2
   4  -6 -14 209.917 63.7959   1
   4   6 -13 140.395 43.7064   1
   0  -6 -12 1468.15 70.4907  -2
   4   6 -12 1468.15 70.4907   1
   0   6 -11 975.252 60.1533  -2
   4  -6 -11 975.252 60.1533   1
   4  -6 -10 88.8370 34.7311   1
  -1   6  -9 436.705 33.4159  -2
   4  -6  -9 436.705 33.4159   1
   4  -6  -8 27.3905 20.7446   1
   4  -6  -7 1488.70 30.2307   1
   2   6   6 672.390 31.5938  -2
  -4  -6   6 672.390 31.5938   1
   4  -6  -5 1002.01 21.3712   1
   4  -6  -4 14.1818 14.4248   1
  -3   6  -3 1259.60 27.3258  -2
   4  -6  -3 1259.60 27.3258   1
  -4   6   2 236.868 17.0133   1
  -4  -6   1 9.51211 11.5297   1
  -4   6   0 3.29440 10.8655  -2
   4  -6   0 3.29440 10.8655   1
  -4  -6  -1 196.257 21.0663   1
   4  -6   2 307.162 23.4155   1
   5   6  -3 1881.72 50.9149  -2
  -4  -6  -3 1881.72 50.9149   1
  -4  -6  -4 1092.09 26.1260   1
   4   6   5 1188.65 28.6023   1
  -6   6   6 438.583 10.9429  -2
   4  -6   6 438.583 10.9429   1
  -4  -6  -7 1086.13 19.9924   1
  -4  -6  -8 95.5497 12.4800   1
   7   6  -9 797.882 32.1967  -2
  -4  -6  -9 797.882 32.1967   1
   4   6  10 352.451 27.6129   1
  -4  -6 -11 9.27486 53.6995   1
  -8  -6  11 1546.55 55.3451  -2
   4   6  11 1546.55 55.3451   1
  -8  -6  12 753.690 45.8836  -2
   4   6  12 753.690 45.8836   1
  -4  -6 -13 169.021 60.3139   1
   9   6 -14 421.628 93.5277  -2
  -4  -6 -14 421.628 93.5277   1
   9   6 -15 286.750 95.6610  -2
  -4  -6 -15 286.750 95.6610   1
  -4  -6 -16 278.842 76.9198   1
  10   6 -17 794.335 114.837  -2
  -4  -6 -17 794.335 114.837   1
  10   6 -18 400.361 114.417  -2
  -4  -6 -18 400.361 114.417   1
  -4  -6 -19 272.224 87.1131   1
  11   6 -20 375.948 125.849  -2
  -4  -6 -20 375.948 125.849   1
   3   7 -20 85.1727 128.681  -2
   4  -7 -20 85.1727 128.681   1
   4  -7 -19-18.9820 89.8919   1
   2   7 -18 256.400 122.162  -2
   4  -7 -18 256.400 122.162   1
   2   7 -17-30.3976 109.518  -2
   4  -7 -17-30.3976 109.518   1
   4  -7 -16 238.047 79.0296   1
   1   7 -15 71.9595 99.2344  -2
   4  -7 -15 71.9595 99.2344   1
   1   7 -14 1602.05 118.024  -2
   4  -7 -14 1602.05 118.024   1
   4  -7 -13-45.5537 66.2160   1
   0   7 -12 1045.78 101.347  -2
   4  -7 -12 1045.78 101.347   1
   4  -7 -11 34.2757 47.9703   1
   0   7 -11 126.737 82.6819  -2
   4  -7 -11 126.737 82.6819   1
   4  -7 -10 1066.77 47.1472   1
   1   7   9 48.0839 38.7200  -2
  -4  -7   9 48.0839 38.7200   1
   4  -7  -8 392.134 24.5271   1
  -4   7   7 32.6401 21.4017   1
   2  -7   6 1281.47 37.4376  -2
  -4   7   6 1281.47 37.4376   1
   4  -7  -5 19.1642 18.7886   1
  -4  -7   4 841.714 21.3055   1
   3   7   3 51.8092 19.3288  -2
  -4  -7   3 51.8092 19.3288   1
  -4   7   2 2684.07 31.1639   1
   4  -7  -1 128.103 13.0732   1
   4   7   0 5965.14 40.2531  -2
  -4  -7   0 5965.14 40.2531   1
  -4  -7  -1 146.393 22.9913   1
   4  -7   2 2335.38 42.2327   1
  -5   7   3 14.4781 32.4525  -2
   4  -7   3 14.4781 32.4525   1
   4  -7   4 836.242 34.5884   1
   4  -7   5 11.8238 19.7699   1
   6   7  -6 912.179 38.8034  -2
  -4  -7  -6 912.179 38.8034   1
   4  -7   7 11.7881 23.1261   1
  -4  -7  -8 2.81949 9.56468   1
  -7  -7   9 227.694 17.4335  -2
   4   7   9 227.694 17.4335   1
  -4  -7 -10 527.012 26.1694   1
  -4  -7 -11-1.37759 52.6120   1
   8   7 -12 227.557 82.5179  -2
  -4  -7 -12 227.557 82.5179   1
  -4  -7 -13 25.5669 59.5678   1
   9   7 -14 1509.25 111.386  -2
  -4  -7 -14 1509.25 111.386   1
   9   7 -15 30.9231 93.5609  -2
  -4  -7 -15 30.9231 93.5609   1
  -4  -7 -16-1.95155 73.2125   1
  10   7 -17 0.64046 107.281  -2
  -4  -7 -17 0.64046 107.281   1
  10   7 -18 230.774 114.839  -2
  -4  -7 -18 230.774 114.839   1
  -4  -7 -19 19.6811 83.7520   1
  11   7 -20 566.300 132.056  -2
  -4  -7 -20 566.300 132.056   1
   3   8 -20 853.502 145.699  -2
   4  -8 -20 853.502 145.699   1
   4  -8 -19 261.790 93.4598   1
   2   8 -18 738.075 130.461  -2
   4  -8 -18 738.075 130.461   1
   2   8 -17 931.513 133.948  -2
   4  -8 -17 931.513 133.948   1
   4  -8 -16 574.021 90.1045   1
   1   8 -15 641.674 110.390  -2
   4  -8 -15 641.674 110.390   1
   1   8 -14 475.636 103.592  -2
   4  -8 -14 475.636 103.592   1
   4  -8 -13 331.637 75.8227   1
   0   8 -12 1093.54 66.1958  -2
   4  -8 -12 1093.54 66.1958   1
   4  -8 -11-25.1950 47.8542   1
   0   8 -11 554.622 96.9727  -2
   4  -8 -11 554.622 96.9727   1
   4  -8 -10 1.36018 34.9880   1
  -1   8  -9 272.296 51.9558  -2
   4  -8  -9 272.296 51.9558   1
  -4  -8   8 100.927 27.4628   1
   4  -8  -7 402.150 24.8532   1
  -2   8  -6 1190.37 38.4914  -2
   4  -8  -6 1190.37 38.4914   1
   4  -8  -5 344.471 22.7387   1
  -4   8   4 160.791 20.9846   1
   3  -8   3 36.7023 21.6671  -2
  -4   8   3 36.7023 21.6671   1
  -4  -8   2 99.2366 16.8635   1
   4  -8  -1 29.1144 12.6083   1
  -4   8   0 1431.51 49.6704  -2
   4  -8   0 1431.51 49.6704   1
   4  -8   1 264.252 26.2161   1
   4  -8   2 863.210 34.1778   1
  -5   8   3 1317.75 52.7377  -2
   4  -8   3 1317.75 52.7377   1
   4  -8   4 759.121 35.7106   1
   4  -8   5 503.291 35.1168   1
  -6   8   6 1038.02 42.3198  -2
   4  -8   6 1038.02 42.3198   1
   4   8   7 769.970 31.6827   1
  -4  -8  -8 853.816 57.8114   1
  -7   8   8 1147.86 91.6941  -2
   4  -8   8 1147.86 91.6941   1
  -7   8   9 124.475 51.3716  -2
   4  -8   9 124.475 51.3716   1
  -4  -8 -10 9.65718 11.3049   1
  -4  -8 -11 6.92286 16.3735   1
   8   8 -12 451.239 85.8694  -2
  -4  -8 -12 451.239 85.8694   1
  -4  -8 -13 96.7453 63.2079   1
   9   8 -14 461.142 98.0394  -2
  -4  -8 -14 461.142 98.0394   1
   9   8 -15 407.711 102.145  -2
  -4  -8 -15 407.711 102.145   1
  -4  -8 -16 235.518 79.0442   1
  10   8 -17 633.089 119.773  -2
  -4  -8 -17 633.089 119.773   1
  10   8 -18 492.471 121.214  -2
  -4  -8 -18 492.471 121.214   1
  -4  -8 -19 105.730 86.6455   1
   4  -9 -19 95.9863 89.6985   1
   2   9 -18 34.2246 123.052  -2
   4  -9 -18 34.2246 123.052   1
   2   9 -17 123.454 122.572  -2
   4  -9 -17 123.454 122.572   1
   4  -9 -16-14.4107 80.5153   1
   1   9 -15 1072.28 122.840  -2
   4  -9 -15 1072.28 122.840   1
   1   9 -14 59.6969 102.211  -2
   4  -9 -14 59.6969 102.211   1
   4  -9 -13 1452.07 96.8889   1
   0   9 -12 44.6188 57.1701  -2
   4  -9 -12 44.6188 57.1701   1
   4  -9 -11 986.060 65.3820   1
   0   9 -11 1211.25 106.308  -2
   4  -9 -11 1211.25 106.308   1
   4  -9 -10 89.2072 39.1595   1
  -1   9  -9 1101.01 61.5117  -2
   4  -9  -9 1101.01 61.5117   1
   4  -9  -8-2.43785 35.4672   1
   4  -9  -7 99.4220 27.7818   1
  -2   9  -6 62.3030 35.7761  -2
   4  -9  -6 62.3030 35.7761   1
   4  -9  -5 49.4054 25.7234   1
   4  -9  -4 55.5947 25.1848   1
  -3   9  -3 994.773 40.8555  -2
   4  -9  -3 994.773 40.8555   1
  -4  -9   2 58.0484 19.6803   1
  -4  -9   1 2434.86 23.2747   1
  -4   9   0 27.2922 28.9589  -2
   4  -9   0 27.2922 28.9589   1
  -4  -9  -1 911.254 35.9433   1
  -4  -9  -2 19.7197 27.7384   1
  -5   9   3 1068.08 53.5171  -2
   4  -9   3 1068.08 53.5171   1
   4  -9   4 39.2161 29.4247   1
  -4  -9  -5 103.875 31.5307   1
   6   9  -6 219.924 47.0361  -2
  -4  -9  -6 219.924 47.0361   1
   4  -9   7-2.48839 33.3763   1
  -4  -9  -8 75.0319 48.3265   1
  -7   9   8 56.8084 80.5436  -2
   4  -9   8 56.8084 80.5436   1
   7   9  -9 1369.10 67.5803  -2
  -4  -9  -9 1369.10 67.5803   1
   4  -9  10 31.3746 39.3785   1
  -4  -9 -11 863.382 70.3773   1
  -8   9  11 994.533 105.192  -2
   4  -9  11 994.533 105.192   1
   8   9 -12 34.4980 62.7590  -2
  -4  -9 -12 34.4980 62.7590   1
  -4  -9 -13 221.705 50.5844   1
  -9   9  14 70.2067 68.7583  -2
   4  -9  14 70.2067 68.7583   1
   9   9 -15 932.903 112.364  -2
  -4  -9 -15 932.903 112.364   1
  -4  -9 -16 4.81615 74.8497   1
  10   9 -17 318.013 120.541  -2
  -4  -9 -17 318.013 120.541   1
  10   9 -18 13.3113 119.504  -2
  -4  -9 -18 13.3113 119.504   1
   2  10 -18 262.028 125.540  -2
   4 -10 -18 262.028 125.540   1
   2  10 -17 525.888 132.897  -2
   4 -10 -17 525.888 132.897   1
   4 -10 -16 280.756 90.7710   1
   1  10 -15 418.639 120.251  -2
   4 -10 -15 418.639 120.251   1
   1  10 -14 173.349 110.299  -2
   4 -10 -14 173.349 110.299   1
   4 -10 -13 353.636 82.1677   1
   0  10 -12 537.439 64.7434  -2
   4 -10 -12 537.439 64.7434   1
   4 -10 -11 42.7369 49.9947   1
   0  10 -11 591.989 102.938  -2
   4 -10 -11 591.989 102.938   1
   4 -10 -10 333.847 43.8643   1
  -1  10  -9 56.5147 53.7417  -2
   4 -10  -9 56.5147 53.7417   1
   4 -10  -8 926.834 48.9380   1
   4 -10  -7 29.0844 35.7936   1
  -2  10  -6 1501.08 67.8495  -2
   4 -10  -6 1501.08 67.8495   1
  -4 -10   5 7.55804 26.3123   1
   4 -10  -4 213.054 28.2003   1
  -3  10  -3 8.63690 26.6373  -2
   4 -10  -3 8.63690 26.6373   1
  -4 -10   2 601.198 18.0650   1
  -4 -10   1 49.4902 10.8851   1
  -4  10   0-13.3805 37.7522  -2
   4 -10   0-13.3805 37.7522   1
  -4 -10  -1 240.252 30.6174   1
  -4 -10  -2 681.393 36.7643   1
  -5  10   3 974.065 55.9511  -2
   4 -10   3 974.065 55.9511   1
  -4 -10  -4 868.281 41.6741   1
  -4 -10  -5 580.760 40.1750   1
   6  10  -6 985.915 60.4182  -2
  -4 -10  -6 985.915 60.4182   1
  -4 -10  -7 605.261 43.4352   1
  -4 -10  -8 372.129 53.8983   1
  -7  10   8 542.993 90.1236  -2
   4 -10   8 542.993 90.1236   1
  -7  10   9 255.132 58.0629  -2
   4 -10   9 255.132 58.0629   1
   4 -10  10 5.73621 42.4400   1
  -4 -10 -11 9.19856 58.0969   1
  -8  10  11-11.0327 92.9014  -2
   4 -10  11-11.0327 92.9014   1
  -8  10  12 382.366 68.1964  -2
   4 -10  12 382.366 68.1964   1
  -4 -10 -13 88.0339 50.7724   1
   9  10 -14 81.5559 71.7161  -2
  -4 -10 -14 81.5559 71.7161   1
  -9  10  15 237.950 76.9704  -2
   4 -10  15 237.950 76.9704   1
  -4 -10 -16 385.359 89.3751   1
  -4 -10 -17 131.355 92.5800   1
   2  11 -17-43.2166 125.048  -2
   4 -11 -17-43.2166 125.048   1
   4 -11 -16 78.6705 89.4876   1
   1  11 -15 222.230 120.943  -2
   4 -11 -15 222.230 120.943   1
   1  11 -14 1195.77 132.769  -2
   4 -11 -14 1195.77 132.769   1
   4 -11 -13 148.942 81.4942   1
   0  11 -12 617.762 67.5681  -2
   4 -11 -12 617.762 67.5681   1
   4 -11 -11 12.0790 49.9783   1
   0  11 -11 125.522 101.665  -2
   4 -11 -11 125.522 101.665   1
   4 -11 -10 443.806 45.9705   1
  -1  11  -9 135.301 55.7887  -2
   4 -11  -9 135.301 55.7887   1
   4 -11  -8 209.332 41.7346   1
   4 -11  -7 7.03423 36.7335   1
  -2  11  -6 457.254 57.6746  -2
   4 -11  -6 457.254 57.6746   1
   4 -11  -5 116.116 38.0287   1
   4 -11  -4 527.831 41.9711   1
   3  11   3 110.657 25.7142  -2
  -4 -11   3 110.657 25.7142   1
  -4 -11   2 1879.38 25.1824   1
   4 -11  -1 54.8707 10.6861   1
   4  11   0 3481.88 83.2416  -2
  -4 -11   0 3481.88 83.2416   1
  -4 -11  -1 80.0892 31.1284   1
  -4 -11  -2 923.021 42.1934   1
   5  11  -3 130.117 47.2437  -2
  -4 -11  -3 130.117 47.2437   1
  -4 -11  -4 384.987 38.9640   1
   4 -11   5 11.5001 34.4929   1
  -6  11   6 631.277 58.5137  -2
   4 -11   6 631.277 58.5137   1
  -4 -11  -7 37.9054 37.8181   1
  -4 -11  -8 21.6323 49.9572   1
  -7  11   8 523.084 95.0282  -2
   4 -11   8 523.084 95.0282   1
   7  11  -9 399.085 62.3771  -2
  -4 -11  -9 399.085 62.3771   1
   4 -11  10 401.342 49.3527   1
  -4 -11 -11 162.706 63.6466   1
  -8  11  11 147.650 101.831  -2
   4 -11  11 147.650 101.831   1
  -8  11  12 398.956 71.5716  -2
   4 -11  12 398.956 71.5716   1
  -4 -11 -13 166.652 53.2438   1
  -9  11  14 922.660 84.7054  -2
   4 -11  14 922.660 84.7054   1
   9  11 -15 139.524 112.633  -2
  -4 -11 -15 139.524 112.633   1
   4 -12 -16 116.497 89.2957   1
   1  12 -15 325.132 125.474  -2
   4 -12 -15 325.132 125.474   1
   1  12 -14 208.209 120.403  -2
   4 -12 -14 208.209 120.403   1
   4 -12 -13-20.1114 84.5523   1
   0  12 -12 127.545 65.1815  -2
   4 -12 -12 127.545 65.1815   1
   4 -12 -11 151.997 54.9573   1
   0  12 -11 428.861 115.550  -2
   4 -12 -11 428.861 115.550   1
   4 -12 -10 7.17717 41.5276   1
  -1  12  -9 519.344 63.3526  -2
   4 -12  -9 519.344 63.3526   1
   4 -12  -8-4.93259 40.4076   1
   4 -12  -7 801.161 49.5783   1
  -2  12  -6 260.195 57.1731  -2
   4 -12  -6 260.195 57.1731   1
   4 -12  -5 773.287 48.4786   1
   4 -12  -4 26.6476 24.2990   1
   3  12   3 1210.23 40.9010  -2
  -4 -12   3 1210.23 40.9010   1
   4 -12  -2 3.08189 17.9742   1
   4 -12  -1 126.690 28.0853   1
  -4  12   0 14.6568 44.4883  -2
   4 -12   0 14.6568 44.4883   1
  -4 -12  -1 74.5105 33.3732   1
   4 -12   2 149.077 35.8999   1
   5  12  -3 1162.56 65.7683  -2
  -4 -12  -3 1162.56 65.7683   1
   4 -12   4 344.622 40.2917   1
  -4 -12  -5 412.902 54.9546   1
  -6  12   5 521.625 87.5953  -2
   4 -12   5 521.625 87.5953   1
  -6  12   6 132.098 54.7901  -2
   4 -12   6 132.098 54.7901   1
   4 -12   7 530.758 47.1098   1
  -4 -12  -8 19.0561 54.7593   1
  -7  12   8 42.1747 93.0178  -2
   4 -12   8 42.1747 93.0178   1
   7  12  -9 346.274 64.6423  -2
  -4 -12  -9 346.274 64.6423   1
   4 -12  10-1.10564 46.5368   1
  -4 -12 -11 26.7232 63.9213   1
  -8  12  11 482.464 112.506  -2
   4 -12  11 482.464 112.506   1
  -8  12  12 73.9817 70.5522  -2
   4 -12  12 73.9817 70.5522   1
   4 -12  13 61.1830 78.0548   1
   1  13 -15 432.636 132.856  -2
   4 -13 -15 432.636 132.856   1
   1  13 -14 343.498 127.253  -2
   4 -13 -14 343.498 127.253   1
   4 -13 -13 407.941 94.1649   1
   0  13 -12 146.784 119.269  -2
   4 -13 -12 146.784 119.269   1
   0  13 -11 644.463 123.058  -2
   4 -13 -11 644.463 123.058   1
   4 -13 -10 145.467 81.3035   1
  -1  13  -9 852.986 70.6256  -2
   4 -13  -9 852.986 70.6256   1
   4 -13  -8 104.879 43.9263   1
   4 -13  -7 130.604 43.7038   1
   2  13   6 13.0217 37.4092  -2
  -4 -13   6 13.0217 37.4092   1
   4 -13  -5 86.7609 41.3388   1
   2  13   5 534.525 59.9055  -2
  -4 -13   5 534.525 59.9055   1
   4 -13  -4 28.1221 39.3817   1
   3  13   3 518.432 48.4164  -2
  -4 -13   3 518.432 48.4164   1
   4 -13  -2-10.7319 29.6072   1
  -4 -13   1 841.305 38.5831   1
   4  13   0-16.2215 42.2638  -2
  -4 -13   0-16.2215 42.2638   1
  -4 -13  -1 588.535 42.0442   1
  -4 -13  -2 16.7886 36.3564   1
   5  13  -3 586.876 61.5318  -2
  -4 -13  -3 586.876 61.5318   1
  -4 -13  -4 12.2275 38.5796   1
  -4 -13  -5-19.0334 54.8148   1
  -6  13   5 552.680 94.1229  -2
   4 -13   5 552.680 94.1229   1
  -6  13   6 175.709 58.8827  -2
   4 -13   6 175.709 58.8827   1
   4 -13   7 89.3460 43.7494   1
  -4 -13  -8 194.572 61.8132   1
  -7  13   8 204.927 99.8494  -2
   4 -13   8 204.927 99.8494   1
   7  13  -9 742.285 72.8778  -2
  -4 -13  -9 742.285 72.8778   1
   4 -13  10 248.609 78.3848   1
  -8  13  11 570.631 115.808  -2
   4 -13  11 570.631 115.808   1
  -8  13  12 160.610 110.126  -2
   4 -13  12 160.610 110.126   1
   4 -14 -13 23.1059 85.7423   1
   0  14 -12 263.606 126.752  -2
   4 -14 -12 263.606 126.752   1
   0  14 -11 61.7935 121.213  -2
   4 -14 -11 61.7935 121.213   1
   4 -14 -10 510.230 94.8774   1
  -1  14  -9 95.8137 114.294  -2
   4 -14  -9 95.8137 114.294   1
   4 -14  -8 963.953 100.387   1
   4 -14  -7 35.6351 76.7542   1
  -2  14  -6 1300.39 76.9093  -2
   4 -14  -6 1300.39 76.9093   1
   4 -14  -5 11.0106 43.4032   1
   4 -14  -4 1001.33 42.9681   1
   3  14   3 138.039 46.9928  -2
  -4 -14   3 138.039 46.9928   1
   4 -14  -2 382.313 36.4605   1
   4 -14  -1 17.1746 31.9118   1
   4  14   0 8.70904 40.0780  -2
  -4 -14   0 8.70904 40.0780   1
  -4 -14  -1 25.9928 33.8628   1
  -4 -14  -2 71.7476 40.9353   1
   5  14  -3 98.5852 51.2730  -2
  -4 -14  -3 98.5852 51.2730   1
   4 -14   4 372.603 46.2275   1
   4 -14   5 201.073 45.0388   1
  -6  14   6 840.900 110.307  -2
   4 -14   6 840.900 110.307   1
   4 -14   7 75.5715 71.4528   1
  -7  14   8 539.501 105.771  -2
   4 -14   8 539.501 105.771   1
  -7  14   9 95.8790 104.742  -2
   4 -14   9 95.8790 104.742   1
   4 -14  10 73.3983 75.3440   1
  -8  14  11 50.3252 107.101  -2
   4 -14  11 50.3252 107.101   1
   0  15 -11 71.0712 121.584  -2
   4 -15 -11 71.0712 121.584   1
   4 -15 -10 188.477 90.8711   1
  -1  15  -9 398.071 128.748  -2
   4 -15  -9 398.071 128.748   1
   4 -15  -8 14.7120 82.3579   1
   4 -15  -7-34.0568 81.5746   1
  -2  15  -6-8.59724 110.020  -2
   4 -15  -6-8.59724 110.020   1
   4 -15  -5 20.1392 44.9342   1
   4 -15  -4 95.9577 44.9741   1
  -3  15  -3 278.011 108.184  -2
   4 -15  -3 278.011 108.184   1
   4 -15  -2 306.574 49.1954   1
   4 -15  -1 145.521 46.1806   1
  -4  15   0 615.936 76.3804  -2
   4 -15   0 615.936 76.3804   1
   4 -15   1 26.0865 45.2063   1
   4 -15   2 254.638 50.4567   1
  -5  15   3 1.94962 71.2121  -2
   4 -15   3 1.94962 71.2121   1
   4 -15   4 0.96027 65.5487   1
   4 -15   5-60.1208 69.0976   1
  -6  15   6 172.953 103.706  -2
   4 -15   6 172.953 103.706   1
   4 -15   7 175.936 77.3968   1
  -7  15   8 499.854 113.446  -2
   4 -15   8 499.854 113.446   1
  -7  15   9 349.672 117.880  -2
   4 -15   9 349.672 117.880   1
   4 -15  10 490.060 89.5699   1
   4 -16  -8-3.33489 85.5716   1
   4 -16  -7 739.668 99.3764   1
  -2  16  -6 5.27443 115.882  -2
   4 -16  -6 5.27443 115.882   1
   4 -16  -5 954.870 100.129   1
   4 -16  -4-21.0882 81.6188   1
  -3  16  -3 1034.29 137.956  -2
   4 -16  -3 1034.29 137.956   1
   4 -16  -2-78.5148 80.4022   1
   4 -16  -1 121.931 78.8923   1
  -4  16   0-28.7471 105.983  -2
   4 -16   0-28.7471 105.983   1
   4 -16   1-13.3531 76.7270   1
   4 -16   2 29.1752 49.3411   1
  -5  16   3 1083.92 90.6503  -2
   4 -16   3 1083.92 90.6503   1
   4 -16   4-8.27878 68.0062   1
   4 -16   5 543.128 85.4050   1
  -6  16   6 1.86358 97.8435  -2
   4 -16   6 1.86358 97.8435   1
   4 -16   7 204.317 76.8071   1
  -7  16   8 71.4862 105.909  -2
   4 -16   8 71.4862 105.909   1
   5   0 -22 314.356 98.4579   1
   2   0 -20-62.3171 113.847  -2
   5   0 -20-62.3171 113.847   1
   1   0 -18 466.325 109.641  -2
   5   0 -18 466.325 109.641   1
   5   0 -16 863.798 82.7086   1
   0   0 -14 2889.52 118.844  -2
   5   0 -14 2889.52 118.844   1
  -1   0 -12 796.019 82.0527  -2
   5   0 -12 796.019 82.0527   1
  -5   0  10 548.313 36.9534   1
   5   0  -8 208.214 24.6923   1
   3   0   6 234.000 30.5165  -2
  -5   0   6 234.000 30.5165   1
   5   0  -4 4995.24 39.2914   1
   5   0  -2 3357.64 37.9219   1
   5   0   0 2138.27 50.8068  -2
  -5   0   0 2138.27 50.8068   1
  -5   0  -2 3958.23 38.2567   1
   5   0   4 18.4748 23.9440   1
  -7   0   6 4909.17 74.2158  -2
   5   0   6 4909.17 74.2158   1
   5   0   8 650.376 39.1390   1
  -5   0 -10 1520.17 73.2446   1
   9   0 -12 1196.81 90.5315  -2
  -5   0 -12 1196.81 90.5315   1
  10   0 -14 770.824 99.9197  -2
  -5   0 -14 770.824 99.9197   1
  -5   0 -16-9.73103 73.0130   1
  11   0 -18 346.852 115.706  -2
  -5   0 -18 346.852 115.706   1
  12   0 -20 1118.64 144.112  -2
  -5   0 -20 1118.64 144.112   1
   5  -1 -22 213.204 67.4940   1
   2  -1 -21 777.052 92.6021  -2
   5   1 -21 777.052 92.6021   1
   2  -1 -20 1295.54 99.7888  -2
   5   1 -20 1295.54 99.7888   1
   5  -1 -19 392.671 60.5156   1
   1   1 -18 852.888 80.1936  -2
   5  -1 -18 852.888 80.1936   1
   1  -1 -17 713.562 77.4710  -2
   5   1 -17 713.562 77.4710   1
   5   1 -16 266.045 51.3878   1
   0   1 -15 1364.86 72.9435  -2
   5  -1 -15 1364.86 72.9435   1
   0  -1 -14 733.408 64.7637  -2
   5   1 -14 733.408 64.7637   1
   5   1 -13 61.9065 41.5011   1
  -1  -1 -12 591.395 56.6556  -2
   5   1 -12 591.395 56.6556   1
  -5  -1  11 449.520 52.7870   1
  -1   1 -11 2090.26 65.0941  -2
   5  -1 -11 2090.26 65.0941   1
   5  -1 -10 34.4205 21.8494   1
   2  -1   9 699.705 29.1873  -2
  -5   1   9 699.705 29.1873   1
   5  -1  -8 283.173 21.0253   1
  -2   1  -8 433.627 60.0530  -2
   5  -1  -8 433.627 60.0530   1
  -5   1   7 1604.32 23.8880   1
   3   1   6 1421.23 27.3827  -2
  -5  -1   6 1421.23 27.3827   1
  -5  -1   5 547.627 16.1515   1
  -5  -1   4 5.93490 11.1725   1
   4   1   3 1646.58 22.8136  -2
  -5  -1   3 1646.58 22.8136   1
   5   1  -2 781.572 15.5835   1
   5   1  -1 403.352 13.6539   1
  -5  -1   0 1328.58 34.9168  -2
   5   1   0 1328.58 34.9168   1
   5   1   1 1199.60 19.7178   1
   5   1   2 1164.54 18.9391   1
  -6   1   3 5085.25 49.8567  -2
   5  -1   3 5085.25 49.8567   1
   5  -1   4 810.924 21.9302   1
  -5  -1  -5 2362.59 27.4242   1
  -7   1   6 1033.87 30.5768  -2
   5  -1   6 1033.87 30.5768   1
  -5  -1  -7 740.218 22.6909   1
  -5  -1  -8-3.04121 24.9018   1
  -8  -1   9 706.495 52.6183  -2
   5   1   9 706.495 52.6183   1
  -5  -1 -10 108.728 35.9675   1
  -5  -1 -11-6.56291 51.6166   1
   9   1 -12 842.561 61.0763  -2
  -5  -1 -12 842.561 61.0763   1
  -5   1 -13 323.291 47.5210   1
  10  -1 -14 975.869 71.3877  -2
  -5   1 -14 975.869 71.3877   1
  10  -1 -15 488.890 69.1160  -2
  -5   1 -15 488.890 69.1160   1
  -5   1 -16 348.124 55.8771   1
  11   1 -17 906.139 118.373  -2
  -5  -1 -17 906.139 118.373   1
  11   1 -18 297.530 111.924  -2
  -5  -1 -18 297.530 111.924   1
  -5  -1 -19 132.887 85.1309   1
  12   1 -20 152.573 122.448  -2
  -5  -1 -20 152.573 122.448   1
   5  -2 -22-3.19502 65.9372   1
   2  -2 -21 129.373 87.7863  -2
   5   2 -21 129.373 87.7863   1
   2  -2 -20 26.3982 82.3215  -2
   5   2 -20 26.3982 82.3215   1
   5   2 -19 38.8918 56.3087   1
   1  -2 -18 79.6095 72.6762  -2
   5   2 -18 79.6095 72.6762   1
   1   2 -17 993.979 79.5869  -2
   5  -2 -17 993.979 79.5869   1
   5   2 -16 57.4629 46.7655   1
   0  -2 -15 1791.29 79.3882  -2
   5   2 -15 1791.29 79.3882   1
   0   2 -14 487.128 62.9587  -2
   5  -2 -14 487.128 62.9587   1
   5   2 -13 1129.70 52.6322   1
  -1  -2 -12 244.257 54.1662  -2
   5   2 -12 244.257 54.1662   1
  -5  -2  11 960.017 57.7592   1
  -1   2 -11 1001.20 56.3720  -2
   5  -2 -11 1001.20 56.3720   1
  -5  -2  10 9.36405 22.1340   1
  -2   2  -9 937.656 30.6878  -2
   5  -2  -9 937.656 30.6878   1
  -5  -2   8 356.248 21.9266   1
  -2  -2  -8 607.672 58.4318  -2
   5   2  -8 607.672 58.4318   1
  -5  -2   7 65.0573 15.0327   1
  -3  -2  -6 283.353 19.7278  -2
   5   2  -6 283.353 19.7278   1
   5  -2  -5 1432.94 18.4495   1
   5   2  -4 62.7356 12.0675   1
  -4  -2  -3 7074.97 35.9630  -2
   5   2  -3 7074.97 35.9630   1
  -5  -2   2 0.30572 8.27339   1
   5   2  -1 3623.27 34.7415   1
  -5  -2   0 558.048 26.7305  -2
   5   2   0 558.048 26.7305   1
   5  -2   1 1820.90 19.0705   1
  -5  -2  -2 43.0668 12.9781   1
  -6   2   3 684.051 23.7490  -2
   5  -2   3 684.051 23.7490   1
  -5  -2  -4 411.773 16.0465   1
  -5  -2  -5 0.27213 14.5023   1
  -7   2   6 293.135 23.5590  -2
   5  -2   6 293.135 23.5590   1
  -5  -2  -7 279.381 19.0595   1
  -5  -2  -8 186.366 29.6812   1
  -8  -2   9 1821.84 61.1979  -2
   5   2   9 1821.84 61.1979   1
  -5  -2 -10 53.3630 50.4880   1
  -5  -2 -11 702.022 61.5337   1
   9   2 -12 194.795 75.9040  -2
  -5  -2 -12 194.795 75.9040   1
  -5  -2 -13 47.3145 58.2493   1
  10   2 -14 81.1408 86.5719  -2
  -5  -2 -14 81.1408 86.5719   1
  10   2 -15 1390.91 107.203  -2
  -5  -2 -15 1390.91 107.203   1
  -5  -2 -16 10.4015 69.5099   1
  11   2 -17 538.040 109.753  -2
  -5  -2 -17 538.040 109.753   1
  11   2 -18 51.2293 107.151  -2
  -5  -2 -18 51.2293 107.151   1
  -5  -2 -19 631.461 95.2394   1
  12   2 -20 127.191 121.230  -2
  -5  -2 -20 127.191 121.230   1
   5   3 -22 231.272 68.8533   1
   2  -3 -21 451.579 89.8659  -2
   5   3 -21 451.579 89.8659   1
   2   3 -20 1079.18 99.0151  -2
   5  -3 -20 1079.18 99.0151   1
   5   3 -19 573.650 65.1191   1
   1  -3 -18 563.435 79.2725  -2
   5   3 -18 563.435 79.2725   1
   1  -3 -17 251.288 70.7989  -2
   5   3 -17 251.288 70.7989   1
   5  -3 -16 333.141 51.3117   1
   0  -3 -15 428.170 66.3172  -2
   5   3 -15 428.170 66.3172   1
   0  -3 -14 688.039 64.0152  -2
   5   3 -14 688.039 64.0152   1
   5  -3 -13 185.820 42.2269   1
  -1   3 -12 927.885 61.0238  -2
   5  -3 -12 927.885 61.0238   1
  -5  -3  11 1.18385 40.8332   1
  -1   3 -11 637.168 45.4882  -2
   5  -3 -11 637.168 45.4882   1
   5  -3 -10 750.080 28.2364   1
   2   3   9 478.662 23.4323  -2
  -5  -3   9 478.662 23.4323   1
  -5   3   8 2110.64 27.0203   1
  -2  -3  -8 2118.49 67.2735  -2
   5   3  -8 2118.49 67.2735   1
  -5  -3   7 39.7198 15.5525   1
  -3   3  -6 3370.08 34.9795  -2
   5  -3  -6 3370.08 34.9795   1
   5   3  -5 6.26202 12.6824   1
   5   3  -4 1501.73 17.7559   1
   4   3   3 295.848 12.1499  -2
  -5  -3   3 295.848 12.1499   1
   5  -3  -2 32.0424 14.1302   1
   5   3  -1 890.885 20.4695   1
  -5   3   0 8.43459 19.2490  -2
   5  -3   0 8.43459 19.2490   1
  -5  -3  -1 247.514 15.3064   1
  -5  -3  -2 1256.86 15.9314   1
  -6  -3   3 1348.18 25.8192  -2
   5   3   3 1348.18 25.8192   1
  -5  -3  -4 1955.17 22.3374   1
   5  -3   5 610.375 17.6204   1
  -7  -3   6 1217.03 29.8521  -2
   5   3   6 1217.03 29.8521   1
   5  -3   7 196.977 19.0293   1
  -5  -3  -8 173.190 20.1782   1
  -8  -3   9 154.464 44.5981  -2
   5   3   9 154.464 44.5981   1
  -5  -3 -10 3.83107 46.7367   1
  -5  -3 -11 15.5550 49.0227   1
   9   3 -12 958.443 86.4412  -2
  -5  -3 -12 958.443 86.4412   1
  -5  -3 -13 214.899 61.3989   1
  10   3 -14 804.559 92.9632  -2
  -5  -3 -14 804.559 92.9632   1
  10   3 -15 318.689 94.2743  -2
  -5  -3 -15 318.689 94.2743   1
  -5  -3 -16 350.603 75.6313   1
  11   3 -17 205.374 104.659  -2
  -5  -3 -17 205.374 104.659   1
  11   3 -18 691.044 119.306  -2
  -5  -3 -18 691.044 119.306   1
  -5  -3 -19 53.1645 84.3441   1
  12   3 -20 189.513 124.355  -2
  -5  -3 -20 189.513 124.355   1
   5  -4 -22 250.731 70.0219   1
   5   4 -21 92.8000 90.1945   1
   2   4 -21 23.1556 132.258  -2
   5  -4 -21 23.1556 132.258   1
   2   4 -20 4.96671 84.4447  -2
   5  -4 -20 4.96671 84.4447   1
   5  -4 -19 19.7203 57.7855   1
   1  -4 -18 475.392 79.5858  -2
   5   4 -18 475.392 79.5858   1
   1  -4 -17 401.945 74.2092  -2
   5   4 -17 401.945 74.2092   1
   5   4 -16 714.379 58.1999   1
   0  -4 -15 152.033 64.7358  -2
   5   4 -15 152.033 64.7358   1
   0  -4 -14 1330.92 71.6804  -2
   5   4 -14 1330.92 71.6804   1
   5  -4 -13 224.928 44.6288   1
  -1  -4 -12 1532.31 66.3589  -2
   5   4 -12 1532.31 66.3589   1
  -1   4 -11 252.084 42.0449  -2
   5  -4 -11 252.084 42.0449   1
   5   4 -10 313.643 25.2610   1
  -2   4  -9 631.509 29.7485  -2
   5  -4  -9 631.509 29.7485   1
  -5   4   8 37.3074 15.4446   1
  -2   4  -8 3098.97 89.4299  -2
   5  -4  -8 3098.97 89.4299   1
   5   4  -7 144.611 15.6464   1
  -3   4  -6 909.229 23.8422  -2
   5  -4  -6 909.229 23.8422   1
   5  -4  -5 270.414 14.8793   1
  -5  -4   4 1741.59 23.9181   1
   4   4   3 56.0303 14.1131  -2
  -5  -4   3 56.0303 14.1131   1
  -5  -4   2 3615.13 31.4732   1
   5   4  -1 50.9149 14.2063   1
   5   4   0 5345.22 49.0097  -2
  -5  -4   0 5345.22 49.0097   1
   5  -4   1-1.35942 11.6356   1
   5   4   2 58.1416 8.70201   1
  -6   4   3 443.680 18.2554  -2
   5  -4   3 443.680 18.2554   1
   5   4   4 11.3135 12.0628   1
   5   4   5 208.560 14.5728   1
   7   4  -6 1485.39 31.6881  -2
  -5  -4  -6 1485.39 31.6881   1
   5   4   7 813.022 22.7050   1
   5   4   8 728.570 23.8769   1
   8   4  -9 241.872 44.9877  -2
  -5  -4  -9 241.872 44.9877   1
  -5  -4 -10 1373.68 68.1270   1
  -5  -4 -11 137.980 52.7992   1
   9   4 -12 1179.41 91.8709  -2
  -5  -4 -12 1179.41 91.8709   1
  -5  -4 -13 306.281 62.8574   1
  10   4 -14 441.976 90.4538  -2
  -5  -4 -14 441.976 90.4538   1
  10   4 -15 109.961 89.0107  -2
  -5  -4 -15 109.961 89.0107   1
  -5  -4 -16 9.58251 69.5630   1
  11   4 -17 100.343 104.382  -2
  -5  -4 -17 100.343 104.382   1
  11   4 -18 339.315 114.127  -2
  -5  -4 -18 339.315 114.127   1
  -5  -4 -19 58.3054 85.8137   1
  12   4 -20 735.032 135.006  -2
  -5  -4 -20 735.032 135.006   1
   5   5 -22 57.8200 92.5642   1
   2  -5 -21 350.191 92.1315  -2
   5   5 -21 350.191 92.1315   1
   2  -5 -20 196.683 86.9848  -2
   5   5 -20 196.683 86.9848   1
   5  -5 -19 363.752 64.9643   1
   1  -5 -18 169.068 76.5665  -2
   5   5 -18 169.068 76.5665   1
   1  -5 -17 582.538 77.2803  -2
   5   5 -17 582.538 77.2803   1
   5  -5 -16 154.825 51.4726   1
   0  -5 -15 20.6869 63.9127  -2
   5   5 -15 20.6869 63.9127   1
   0  -5 -14 460.833 65.9000  -2
   5   5 -14 460.833 65.9000   1
   5   5 -13 437.691 46.6342   1
  -1   5 -12 81.1671 43.7412  -2
   5  -5 -12 81.1671 43.7412   1
   5  -5 -11 829.038 62.4129   1
  -1  -5 -11 1882.74 67.1315  -2
   5   5 -11 1882.74 67.1315   1
  -5  -5  10 6.36787 22.6298   1
  -2   5  -9 2745.49 47.0154  -2
   5  -5  -9 2745.49 47.0154   1
   5  -5  -8 175.802 17.5504   1
   5  -5  -7 2841.56 32.7406   1
  -3   5  -6 526.316 25.7344  -2
   5  -5  -6 526.316 25.7344   1
  -5  -5   5 1261.61 22.0039   1
   5  -5  -4 19.6352 13.2693   1
  -4   5  -3 1592.51 26.4770  -2
   5  -5  -3 1592.51 26.4770   1
  -5  -5   2 49.9554 9.36330   1
  -5  -5   1 2.24791 5.46620   1
   5   5   0-0.89697 10.0972  -2
  -5  -5   0-0.89697 10.0972   1
   5   5   1 137.945 7.90324   1
  -5  -5  -2 25.2357 8.63249   1
  -6   5   3 4723.73 34.4184  -2
   5  -5   3 4723.73 34.4184   1
  -5  -5  -4 90.4885 10.1757   1
   5   5   5 1517.85 21.0935   1
  -7  -5   6 103.682 19.7864  -2
   5   5   6 103.682 19.7864   1
   5   5   7 815.105 21.6766   1
   5   5   8-0.12301 19.3029   1
  -8  -5   8 30.1716 51.2414  -2
   5   5   8 30.1716 51.2414   1
  -8  -5   9 665.961 30.6356  -2
   5   5   9 665.961 30.6356   1
  -5  -5 -10 71.1378 25.3687   1
  -5  -5 -11 216.765 53.4151   1
   9   5 -12 104.935 74.5023  -2
  -5  -5 -12 104.935 74.5023   1
  -5  -5 -13 180.318 59.1166   1
  10   5 -14 209.045 88.8212  -2
  -5  -5 -14 209.045 88.8212   1
  10   5 -15 610.639 99.4038  -2
  -5  -5 -15 610.639 99.4038   1
  -5  -5 -16 223.349 75.5594   1
  11   5 -17 1214.96 122.224  -2
  -5  -5 -17 1214.96 122.224   1
  11   5 -18 40.7817 110.240  -2
  -5  -5 -18 40.7817 110.240   1
  -5  -5 -19 20.4546 86.9578   1
  12   5 -20-15.8022 121.090  -2
  -5  -5 -20-15.8022 121.090   1
   5   6 -22 363.231 103.119   1
   5   6 -21 231.052 90.6402   1
   2   6 -21 169.917 131.781  -2
   5  -6 -21 169.917 131.781   1
   2   6 -20 210.573 87.9806  -2
   5  -6 -20 210.573 87.9806   1
   5  -6 -19 55.1825 61.8549   1
   1  -6 -18 569.152 83.6876  -2
   5   6 -18 569.152 83.6876   1
   1   6 -17 776.684 84.3688  -2
   5  -6 -17 776.684 84.3688   1
   5   6 -16 19.4950 49.0003   1
   0   6 -15 713.123 71.9401  -2
   5  -6 -15 713.123 71.9401   1
   0   6 -14 513.829 67.2224  -2
   5  -6 -14 513.829 67.2224   1
   5   6 -13 636.005 51.0880   1
  -1  -6 -12 702.144 50.6299  -2
   5   6 -12 702.144 50.6299   1
   5  -6 -11 762.878 58.9315   1
  -1  -6 -11 1037.71 61.9066  -2
   5   6 -11 1037.71 61.9066   1
   5  -6 -10 122.103 29.4186   1
   2   6   9 1119.36 46.3969  -2
  -5  -6   9 1119.36 46.3969   1
   5  -6  -8 26.1462 21.5967   1
   5  -6  -7 152.568 18.0900   1
   3   6   6 391.589 25.4731  -2
  -5  -6   6 391.589 25.4731   1
  -5  -6   5 110.233 15.7938   1
   5  -6  -4 348.757 16.5427   1
   4   6   3 1883.01 30.7513  -2
  -5  -6   3 1883.01 30.7513   1
   5  -6  -2 68.2175 12.6935   1
  -5  -6   1 1522.02 18.7466   1
   5   6   0 24.3572 11.9108  -2
  -5  -6   0 24.3572 11.9108   1
   5  -6   1 538.703 21.2720   1
   5  -6   2 48.2182 20.1326   1
  -6   6   3 138.807 31.7652  -2
   5  -6   3 138.807 31.7652   1
   5   6   4 165.641 22.5667   1
  -5  -6  -5 26.6686 18.4394   1
  -7  -6   6 878.152 20.2885  -2
   5   6   6 878.152 20.2885   1
   5  -6   7 1008.29 20.0311   1
   5   6   8 1101.68 18.8388   1
   8   6  -9 1253.45 28.6564  -2
  -5  -6  -9 1253.45 28.6564   1
  -5  -6 -10 662.829 28.3041   1
  -5  -6 -11 730.619 33.4475   1
  -9   6  11 1234.07 46.5541  -2
   5  -6  11 1234.07 46.5541   1
   9   6 -12 410.014 81.3273  -2
  -5  -6 -12 410.014 81.3273   1
  -5  -6 -13 200.508 61.4827   1
  10   6 -14 219.643 86.1276  -2
  -5  -6 -14 219.643 86.1276   1
  10   6 -15 510.924 97.3922  -2
  -5  -6 -15 510.924 97.3922   1
  -5  -6 -16 30.0971 71.3934   1
  11   6 -17 104.768 104.085  -2
  -5  -6 -17 104.768 104.085   1
  11   6 -18 120.798 112.017  -2
  -5  -6 -18 120.798 112.017   1
  -5  -6 -19 155.177 87.4380   1
   2   7 -20 527.032 136.555  -2
   5  -7 -20 527.032 136.555   1
   5  -7 -19 62.4928 89.0377   1
   1   7 -18 490.129 126.049  -2
   5  -7 -18 490.129 126.049   1
   1   7 -17 9.62397 105.691  -2
   5  -7 -17 9.62397 105.691   1
   5  -7 -16 41.8878 75.8156   1
   0   7 -15 182.426 99.9251  -2
   5  -7 -15 182.426 99.9251   1
   0   7 -14 277.690 99.2201  -2
   5  -7 -14 277.690 99.2201   1
   5  -7 -13 74.8858 44.9658   1
  -1   7 -12 1310.90 69.8368  -2
   5  -7 -12 1310.90 69.8368   1
   5  -7 -11 503.310 58.8265   1
  -1   7 -11 1.66690 84.6857  -2
   5  -7 -11 1.66690 84.6857   1
   5  -7 -10 1981.02 59.8799   1
  -2   7  -9 92.2343 38.1753  -2
   5  -7  -9 92.2343 38.1753   1
  -5  -7   8 3509.33 52.3569   1
   5  -7  -7 0.50570 20.4677   1
  -3   7  -6 2693.04 44.2246  -2
   5  -7  -6 2693.04 44.2246   1
   5  -7  -5 0.87262 15.8247   1
   5  -7  -4 1344.85 23.4527   1
   4  -7   3 6.62879 19.0904  -2
  -5   7   3 6.62879 19.0904   1
  -5  -7   2 199.274 14.1750   1
  -5  -7   1 42.3134 11.9596   1
  -5   7   0 1163.02 40.2722  -2
   5  -7   0 1163.02 40.2722   1
   5  -7   1 91.8541 20.9488   1
   5  -7   2 863.490 29.6799   1
  -6   7   3 124.912 33.6913  -2
   5  -7   3 124.912 33.6913   1
   5  -7   4 1023.87 35.2859   1
   5   7   5-6.69713 19.5999   1
  -7   7   6 1622.09 45.3061  -2
   5  -7   6 1622.09 45.3061   1
  -5  -7  -7 119.273 23.4744   1
   5  -7   8 202.325 10.7781   1
  -8  -7   9 35.6152 13.9470  -2
   5   7   9 35.6152 13.9470   1
  -5  -7 -10 25.7631 17.0976   1
  -5  -7 -11-1.69902 20.7744   1
  -9   7  11 31.3196 86.6295  -2
   5  -7  11 31.3196 86.6295   1
  -9   7  12 1618.87 44.9810  -2
   5  -7  12 1618.87 44.9810   1
  -5  -7 -13 52.1654 44.5909   1
 -10   7  14 586.770 71.8121  -2
   5  -7  14 586.770 71.8121   1
  10   7 -15 85.2278 94.6145  -2
  -5  -7 -15 85.2278 94.6145   1
  -5  -7 -16 339.287 76.7336   1
  11   7 -17 103.759 107.056  -2
  -5  -7 -17 103.759 107.056   1
  11   7 -18 574.716 121.880  -2
  -5  -7 -18 574.716 121.880   1
  -5  -7 -19 35.9580 89.3302   1
   2   8 -20 82.9744 130.295  -2
   5  -8 -20 82.9744 130.295   1
   5  -8 -19 49.5218 94.3424   1
   1   8 -18 727.460 132.399  -2
   5  -8 -18 727.460 132.399   1
   1   8 -17 776.581 132.530  -2
   5  -8 -17 776.581 132.530   1
   5  -8 -16 122.418 80.3591   1
   0   8 -15 415.735 111.624  -2
   5  -8 -15 415.735 111.624   1
   0   8 -14 962.188 114.765  -2
   5  -8 -14 962.188 114.765   1
   5  -8 -13 420.296 49.2206   1
  -1   8 -12 737.760 65.9409  -2
   5  -8 -12 737.760 65.9409   1
  -1   8 -11 757.772 61.9951  -2
   5  -8 -11 757.772 61.9951   1
   5  -8 -10 439.151 44.5353   1
  -2   8  -9 394.044 54.6688  -2
   5  -8  -9 394.044 54.6688   1
  -5  -8   8 80.2486 28.1345   1
   5  -8  -7 43.0325 21.0898   1
  -3   8  -6 39.7241 26.9796  -2
   5  -8  -6 39.7241 26.9796   1
   5  -8  -5 201.336 20.5297   1
   5  -8  -4 102.991 18.7972   1
   4   8   3 1236.95 33.6259  -2
  -5  -8   3 1236.95 33.6259   1
  -5  -8   2 312.536 14.2840   1
  -5  -8   1 403.714 14.7708   1
   5   8   0 765.772 32.1529  -2
  -5  -8   0 765.772 32.1529   1
   5  -8   1 233.310 25.5901   1
   5  -8   2 17.4261 24.2063   1
  -6   8   3 185.955 37.6980  -2
   5  -8   3 185.955 37.6980   1
   5  -8   4 181.938 29.0258   1
  -5  -8  -5 283.790 31.5037   1
  -7  -8   6 848.425 39.6195  -2
   5   8   6 848.425 39.6195   1
   5   8   7 939.130 32.5016   1
   5   8   8 999.637 35.0509   1
  -8   8   9 1157.77 64.3791  -2
   5  -8   9 1157.77 64.3791   1
  -5  -8 -10 821.917 49.6416   1
  -5  -8 -11 490.770 62.8927   1
  -9   8  11 612.377 97.0144  -2
   5  -8  11 612.377 97.0144   1
   9   8 -12 349.459 64.2186  -2
  -5  -8 -12 349.459 64.2186   1
  -5  -8 -13 516.543 53.7926   1
 -10   8  14 463.039 72.2419  -2
   5  -8  14 463.039 72.2419   1
  10   8 -15 115.667 71.5791  -2
  -5  -8 -15 115.667 71.5791   1
   5  -8  16 12.6427 52.6964   1
  11   8 -17 107.408 109.291  -2
  -5  -8 -17 107.408 109.291   1
  11   8 -18 367.386 121.495  -2
  -5  -8 -18 367.386 121.495   1
   5  -9 -19 263.174 97.6950   1
   1   9 -18 42.5892 122.209  -2
   5  -9 -18 42.5892 122.209   1
   1   9 -17 555.172 129.092  -2
   5  -9 -17 555.172 129.092   1
   5  -9 -16 47.7543 84.1891   1
   0   9 -15 385.912 116.162  -2
   5  -9 -15 385.912 116.162   1
   0   9 -14 49.9040 106.505  -2
   5  -9 -14 49.9040 106.505   1
   5  -9 -13 96.3306 45.3378   1
  -1   9 -12 44.6722 58.0223  -2
   5  -9 -12 44.6722 58.0223   1
  -1   9 -11 1581.37 69.9666  -2
   5  -9 -11 1581.37 69.9666   1
   5  -9 -10 1.21793 40.2639   1
  -2   9  -9 1594.43 71.1650  -2
   5  -9  -9 1594.43 71.1650   1
   5  -9  -8-4.61792 28.6750   1
   5  -9  -7 1606.73 38.2278   1
   3   9   6 40.6588 28.5772  -2
  -5  -9   6 40.6588 28.5772   1
   5  -9  -5 649.122 24.7989   1
   5  -9  -4 6.63404 18.6896   1
  -4   9  -3 969.062 33.2374  -2
   5  -9  -3 969.062 33.2374   1
   5  -9  -2 16.8574 15.0194   1
  -5  -9   1 21.4015 8.32612   1
  -5   9   0 23.8727 26.8565  -2
   5  -9   0 23.8727 26.8565   1
   5  -9   1 710.013 32.9991   1
  -5  -9  -2 64.9751 26.7987   1
   6   9  -3 3758.80 77.3859  -2
  -5  -9  -3 3758.80 77.3859   1
   5  -9   4-6.07996 28.0449   1
  -5  -9  -5 574.858 36.8659   1
   7   9  -6 51.5621 44.3793  -2
  -5  -9  -6 51.5621 44.3793   1
  -5  -9  -7 592.612 41.9219   1
  -5  -9  -8 15.9139 45.6314   1
  -8   9   8 56.2398 83.8969  -2
   5  -9   8 56.2398 83.8969   1
  -8   9   9 795.388 61.6976  -2
   5  -9   9 795.388 61.6976   1
  -5  -9 -10 5.95574 40.7268   1
  -5  -9 -11 184.163 59.4810   1
  -9   9  11 910.189 109.296  -2
   5  -9  11 910.189 109.296   1
  -9   9  12 16.4984 63.6309  -2
   5  -9  12 16.4984 63.6309   1
   5  -9  13 364.511 53.2622   1
  10   9 -14-17.5056 68.8041  -2
  -5  -9 -14-17.5056 68.8041   1
  10   9 -15 332.940 76.2897  -2
  -5  -9 -15 332.940 76.2897   1
   5  -9  16 34.3056 55.5101   1
   1  10 -18 287.729 130.126  -2
   5 -10 -18 287.729 130.126   1
   1  10 -17 460.975 129.863  -2
   5 -10 -17 460.975 129.863   1
   5 -10 -16 293.068 93.5012   1
   0  10 -15 219.264 118.586  -2
   5 -10 -15 219.264 118.586   1
   0  10 -14 948.379 125.825  -2
   5 -10 -14 948.379 125.825   1
   5 -10 -13 316.889 51.6095   1
  -1  10 -12 671.691 66.7553  -2
   5 -10 -12 671.691 66.7553   1
  -1  10 -11 242.027 59.4817  -2
   5 -10 -11 242.027 59.4817   1
   5 -10 -10 81.6651 42.6501   1
  -2  10  -9 463.652 62.9069  -2
   5 -10  -9 463.652 62.9069   1
   5 -10  -8 9.34519 39.6999   1
   5 -10  -7 10.0414 37.8916   1
  -3  10  -6 244.887 33.3483  -2
   5 -10  -6 244.887 33.3483   1
  -5 -10   5 75.8612 20.8856   1
   5 -10  -4 807.953 26.3679   1
   4  10   3 884.556 34.6355  -2
  -5 -10   3 884.556 34.6355   1
  -5 -10   2 1588.79 26.2338   1
  -5 -10   1 58.7886 9.61063   1
  -5  10   0 2812.24 57.1050  -2
   5 -10   0 2812.24 57.1050   1
  -5 -10  -1 4.00895 27.7824   1
   5 -10   2 201.938 30.6373   1
   6  10  -3 183.200 44.1176  -2
  -5 -10  -3 183.200 44.1176   1
   5 -10   4 47.5623 31.1990   1
   5 -10   5 494.707 38.5359   1
   7  10  -6 447.326 52.0098  -2
  -5 -10  -6 447.326 52.0098   1
   5 -10   7 824.813 45.8352   1
  -5 -10  -8 392.413 52.7287   1
  -8  10   8 527.876 93.5450  -2
   5 -10   8 527.876 93.5450   1
  -8  10   9 753.502 64.7936  -2
   5 -10   9 753.502 64.7936   1
   5 -10  10 596.314 50.7552   1
  -5 -10 -11 806.102 72.8052   1
  -9  10  11 893.972 112.648  -2
   5 -10  11 893.972 112.648   1
   9  10 -12 426.000 71.3363  -2
  -5 -10 -12 426.000 71.3363   1
  -5 -10 -13 336.655 54.5320   1
  -5 -10 -14 72.8080 72.7978   1
 -10  10  14 430.925 114.474  -2
   5 -10  14 430.925 114.474   1
 -10  10  15 136.384 110.281  -2
   5 -10  15 136.384 110.281   1
   1  11 -17 40.0429 124.887  -2
   5 -11 -17 40.0429 124.887   1
   5 -11 -16 182.831 90.4148   1
   0  11 -15 274.127 123.333  -2
   5 -11 -15 274.127 123.333   1
   0  11 -14 339.880 122.503  -2
   5 -11 -14 339.880 122.503   1
   5 -11 -13 28.7590 49.8417   1
  -1  11 -12 585.397 68.6385  -2
   5 -11 -12 585.397 68.6385   1
  -1  11 -11 227.943 61.9770  -2
   5 -11 -11 227.943 61.9770   1
   5 -11 -10 712.546 53.4257   1
  -2  11  -9 28.9562 55.5319  -2
   5 -11  -9 28.9562 55.5319   1
   5 -11  -8 950.065 53.2637   1
   5 -11  -7 30.2955 40.9969   1
  -3  11  -6 1366.79 74.3376  -2
   5 -11  -6 1366.79 74.3376   1
   5 -11  -5-1.78268 38.3901   1
  -5 -11   4 663.251 35.6596   1
  -4  11  -3 67.4692 30.6139  -2
   5 -11  -3 67.4692 30.6139   1
  -5 -11   2 24.8698 15.2496   1
  -5 -11   1 79.0493 26.3784   1
  -5  11   0 570.396 39.4958  -2
   5 -11   0 570.396 39.4958   1
   5 -11   1 175.270 31.8810   1
   5 -11   2 1121.51 42.9311   1
  -6  11   3 129.958 43.7184  -2
   5 -11   3 129.958 43.7184   1
  -5 -11  -4 965.761 44.6774   1
  -5 -11  -5 181.380 37.0799   1
  -7  11   6 596.842 57.2699  -2
   5 -11   6 596.842 57.2699   1
   5 -11   7 70.1872 38.5796   1
  -5 -11  -8 197.047 51.5917   1
  -8  11   8 1012.08 106.516  -2
   5 -11   8 1012.08 106.516   1
   8  11  -9 55.0948 59.1727  -2
  -5 -11  -9 55.0948 59.1727   1
   5 -11  10 33.3890 44.4738   1
  -9  11  11 78.9696 103.644  -2
   5 -11  11 78.9696 103.644   1
  -9  11  12 945.190 120.529  -2
   5 -11  12 945.190 120.529   1
   5 -11  13 28.9491 78.9370   1
   5 -12 -16 13.6517 92.3957   1
   0  12 -15 531.512 131.536  -2
   5 -12 -15 531.512 131.536   1
   0  12 -14 219.810 122.735  -2
   5 -12 -14 219.810 122.735   1
   5 -12 -13 808.498 62.3368   1
  -1  12 -12 294.802 68.1059  -2
   5 -12 -12 294.802 68.1059   1
  -1  12 -11 1117.17 72.8364  -2
   5 -12 -11 1117.17 72.8364   1
   5 -12 -10 48.6964 45.6965   1
  -2  12  -9 752.596 70.0641  -2
   5 -12  -9 752.596 70.0641   1
   5 -12  -8 68.4559 43.2439   1
   5 -12  -7 10.4511 42.0408   1
  -3  12  -6 88.7188 57.3251  -2
   5 -12  -6 88.7188 57.3251   1
   5 -12  -5 468.145 47.4971   1
  -5 -12   4 22.7152 24.8944   1
   4  12   3 1162.15 54.3126  -2
  -5 -12   3 1162.15 54.3126   1
  -5 -12   2 2.92456 27.4845   1
  -5 -12   1 722.881 34.9615   1
   5  12   0 0.33456 35.1408  -2
  -5 -12   0 0.33456 35.1408   1
   5 -12   1 302.550 35.7587   1
  -5 -12  -2 19.6116 33.1264   1
  -6  12   3 80.0529 48.5422  -2
   5 -12   3 80.0529 48.5422   1
   5 -12   4 242.483 37.7104   1
  -5 -12  -5 1.41677 45.1762   1
  -7  12   5 708.401 95.4192  -2
   5 -12   5 708.401 95.4192   1
  -7  12   6 496.915 60.3014  -2
   5 -12   6 496.915 60.3014   1
  -5 -12  -7 200.229 43.1586   1
  -5 -12  -8 328.547 59.2072   1
  -8  12   8 353.045 100.535  -2
   5 -12   8 353.045 100.535   1
  -8  12   9 620.443 109.791  -2
   5 -12   9 620.443 109.791   1
   5 -12  10 236.381 76.7378   1
  -9  12  11 819.214 117.068  -2
   5 -12  11 819.214 117.068   1
  -9  12  12 367.892 115.578  -2
   5 -12  12 367.892 115.578   1
   5 -12  13 27.0833 81.9116   1
   0  13 -14 267.751 126.130  -2
   5 -13 -14 267.751 126.130   1
   5 -13 -13 42.4562 87.6384   1
  -1  13 -12 152.719 121.973  -2
   5 -13 -12 152.719 121.973   1
  -1  13 -11 503.810 123.453  -2
   5 -13 -11 503.810 123.453   1
   5 -13 -10 19.9617 48.0069   1
  -2  13  -9 604.913 71.6732  -2
   5 -13  -9 604.913 71.6732   1
   5 -13  -8-20.2810 45.0650   1
   5 -13  -7 732.506 54.7964   1
  -3  13  -6 222.916 63.2312  -2
   5 -13  -6 222.916 63.2312   1
   5 -13  -5 422.694 48.4228   1
   5 -13  -4-7.41397 30.2795   1
  -4  13  -3 538.858 48.8919  -2
   5 -13  -3 538.858 48.8919   1
   5 -13  -2 17.9880 29.0918   1
   5 -13  -1 65.6337 29.7008   1
   5  13   0 396.220 47.6432  -2
  -5 -13   0 396.220 47.6432   1
   5 -13   1 178.697 37.2032   1
   5 -13   2 280.221 39.6198   1
  -6  13   3 1303.45 69.7149  -2
   5 -13   3 1303.45 69.7149   1
   5 -13   4 175.521 67.7232   1
   5 -13   5 414.388 73.9274   1
  -7  13   6 133.767 95.9209  -2
   5 -13   6 133.767 95.9209   1
   5 -13   7 301.628 75.7720   1
  -8  13   8 7.78562 103.889  -2
   5 -13   8 7.78562 103.889   1
  -8  13   9 303.789 107.345  -2
   5 -13   9 303.789 107.345   1
   5 -13  10 11.0779 76.8885   1
  -9  13  11 364.643 112.090  -2
   5 -13  11 364.643 112.090   1
  -1  14 -12 466.589 130.085  -2
   5 -14 -12 466.589 130.085   1
  -1  14 -11 89.2700 121.398  -2
   5 -14 -11 89.2700 121.398   1
   5 -14 -10 89.2583 87.1840   1
  -2  14  -9 72.4704 115.867  -2
   5 -14  -9 72.4704 115.867   1
   5 -14  -8-2.69013 82.5599   1
   5 -14  -7 14.6407 46.5050   1
  -3  14  -6 510.218 70.9644  -2
   5 -14  -6 510.218 70.9644   1
   5 -14  -5 36.8498 45.7841   1
   5 -14  -4 751.866 54.9999   1
  -4  14  -3 54.1160 63.6483  -2
   5 -14  -3 54.1160 63.6483   1
   5 -14  -2 897.150 57.7059   1
   5 -14  -1-26.7179 44.9984   1
  -5  14   0 1242.58 88.1642  -2
   5 -14   0 1242.58 88.1642   1
   5 -14   1-50.2233 46.5624   1
   5 -14   2 297.881 66.5397   1
  -6  14   3 27.5936 72.0104  -2
   5 -14   3 27.5936 72.0104   1
   5 -14   4 92.8734 67.9864   1
   5 -14   5 13.4911 69.2223   1
  -7  14   6 992.449 118.352  -2
   5 -14   6 992.449 118.352   1
   5 -14   7 141.853 75.7021   1
  -8  14   8 351.858 110.220  -2
   5 -14   8 351.858 110.220   1
  -8  14   9 138.332 107.125  -2
   5 -14   9 138.332 107.125   1
   5 -14  10 241.844 82.9443   1
   5 -15 -10 35.0963 89.9151   1
  -2  15  -9 164.031 126.051  -2
   5 -15  -9 164.031 126.051   1
   5 -15  -8 275.179 91.6795   1
   5 -15  -7-4.99076 86.0018   1
  -3  15  -6 703.046 130.561  -2
   5 -15  -6 703.046 130.561   1
   5 -15  -5 9.07915 77.2631   1
   5 -15  -4 26.5560 47.4182   1
  -4  15  -3 22.3344 59.8640  -2
   5 -15  -3 22.3344 59.8640   1
   5 -15  -2 87.2133 47.8734   1
   5 -15  -1 129.926 49.1392   1
  -5  15   0 278.874 54.3566  -2
   5 -15   0 278.874 54.3566   1
   5 -15   1 261.613 52.6192   1
   5 -15   2 216.297 52.2880   1
  -6  15   3 385.190 101.748  -2
   5 -15   3 385.190 101.748   1
   5 -15   4 538.381 81.9215   1
   5 -15   5 300.189 77.4676   1
  -7  15   6 290.716 111.298  -2
   5 -15   6 290.716 111.298   1
   5 -15   7-15.6045 75.3068   1
  -8  15   8 157.403 106.388  -2
   5 -15   8 157.403 106.388   1
  -3  16  -6 80.0631 115.431  -2
   5 -16  -6 80.0631 115.431   1
   5 -16  -5 312.774 88.4039   1
   5 -16  -4 15.6061 82.5881   1
  -4  16  -3 1055.64 141.170  -2
   5 -16  -3 1055.64 141.170   1
   5 -16  -2-24.7511 81.6442   1
   5 -16  -1 936.602 100.010   1
  -5  16   0-25.5228 112.802  -2
   5 -16   0-25.5228 112.802   1
   5 -16   1 508.451 60.6223   1
   5 -16   2-0.40793 52.0710   1
  -6  16   3 3.80456 100.328  -2
   5 -16   3 3.80456 100.328   1
   5 -16   4 37.6993 70.8406   1
   5 -16   5 7.91488 76.2789   1
  -7  16   6-19.0520 98.6564  -2
   5 -16   6-19.0520 98.6564   1
   5 -16   7 60.4335 68.1047   1
   6   0 -22 402.838 97.1641   1
   1   0 -20 542.473 126.950  -2
   6   0 -20 542.473 126.950   1
   0   0 -18 280.049 106.761  -2
   6   0 -18 280.049 106.761   1
   6   0 -16 27.8290 68.0382   1
  -1   0 -14 631.186 93.1168  -2
   6   0 -14 631.186 93.1168   1
  -2   0 -12 3336.47 113.722  -2
   6   0 -12 3336.47 113.722   1
  -6   0  10 2690.59 56.1280   1
  -6   0   8 1852.91 36.2243   1
   4   0   6 3739.23 50.4414  -2
  -6   0   6 3739.23 50.4414   1
  -6   0   4 354.870 19.8819   1
   6   0  -2 338.957 19.2395   1
  -6   0   0 3057.46 62.5710  -2
   6   0   0 3057.46 62.5710   1
   6   0   2 1813.29 30.6309   1
   6   0   4 3099.87 48.7322   1
  -8   0   6 851.555 50.7875  -2
   6   0   6 851.555 50.7875   1
   6   0   8 45.3197 32.1903   1
   6   0  10 201.787 48.8624   1
  10   0 -12 1935.85 104.750  -2
  -6   0 -12 1935.85 104.750   1
   6   1 -22 110.648 64.7073   1
   1  -1 -21 282.253 88.1578  -2
   6   1 -21 282.253 88.1578   1
   1  -1 -20 22.5145 82.2945  -2
   6   1 -20 22.5145 82.2945   1
   6   1 -19 43.5944 54.8389   1
   0  -1 -18 404.927 76.7288  -2
   6   1 -18 404.927 76.7288   1
   0  -1 -17 1062.69 83.6726  -2
   6   1 -17 1062.69 83.6726   1
   6  -1 -16 395.101 51.7823   1
  -1  -1 -15 802.082 71.5191  -2
   6   1 -15 802.082 71.5191   1
  -1  -1 -14 544.167 63.1786  -2
   6   1 -14 544.167 63.1786   1
   6   1 -13 114.993 40.6005   1
  -2  -1 -12 1211.84 64.0389  -2
   6   1 -12 1211.84 64.0389   1
  -2   1 -11 414.860 52.0073  -2
   6  -1 -11 414.860 52.0073   1
  -6  -1  10 216.501 21.7440   1
   3   1   9 790.278 29.5024  -2
  -6  -1   9 790.278 29.5024   1
   6  -1  -8 21.5429 16.7253   1
  -3   1  -8 569.307 63.5581  -2
   6  -1  -8 569.307 63.5581   1
  -6  -1   7 131.836 15.4327   1
  -4  -1  -6 788.763 21.6774  -2
   6   1  -6 788.763 21.6774   1
   6  -1  -5 2189.49 21.2549   1
   6  -1  -4 398.251 14.3252   1
  -5  -1  -3 4486.75 41.1657  -2
   6   1  -3 4486.75 41.1657   1
   6   1  -2-6.10669 12.8963   1
  -6  -1   1 466.045 16.2527   1
   6  -1   0 564.595 27.9833  -2
  -6   1   0 564.595 27.9833   1
   6  -1   1 528.246 16.6293   1
   6   1   2 403.079 16.3668   1
  -7  -1   3 424.329 25.9643  -2
   6   1   3 424.329 25.9643   1
   6   1   4 697.250 21.9402   1
   6  -1   5 1318.91 27.0816   1
  -8  -1   6 2193.55 43.2504  -2
   6   1   6 2193.55 43.2504   1
   6  -1   7 1175.24 26.1566   1
   6  -1   8 1784.87 34.3591   1
  -9  -1   9 676.815 41.4605  -2
   6   1   9 676.815 41.4605   1
   6   1  10 534.930 32.5495   1
  -6  -1 -11 491.154 41.5026   1
 -10  -1  11 968.180 75.3691  -2
   6   1  11 968.180 75.3691   1
  10   1 -12 278.788 81.5179  -2
  -6  -1 -12 278.788 81.5179   1
  -6  -1 -13 131.459 58.9359   1
  11   1 -14 235.209 92.3122  -2
  -6  -1 -14 235.209 92.3122   1
  11   1 -15 142.860 95.0715  -2
  -6  -1 -15 142.860 95.0715   1
  -6  -1 -16 144.399 77.5566   1
  12   1 -17 275.223 111.312  -2
  -6  -1 -17 275.223 111.312   1
  12   1 -18 233.165 116.141  -2
  -6  -1 -18 233.165 116.141   1
  -6  -1 -19 385.152 93.7323   1
   6   2 -22 39.5558 65.3605   1
   1  -2 -21 703.927 93.5639  -2
   6   2 -21 703.927 93.5639   1
   1  -2 -20 127.142 84.6695  -2
   6   2 -20 127.142 84.6695   1
   6  -2 -19 219.063 57.4424   1
   0  -2 -18 88.9864 74.6774  -2
   6   2 -18 88.9864 74.6774   1
   0   2 -17 141.892 69.1950  -2
   6  -2 -17 141.892 69.1950   1
   6   2 -16 140.900 49.1314   1
  -1  -2 -15 720.037 67.8702  -2
   6   2 -15 720.037 67.8702   1
  -1   2 -14 462.406 62.0899  -2
   6  -2 -14 462.406 62.0899   1
   6  -2 -13 829.424 50.3640   1
  -2  -2 -12 96.2741 53.2747  -2
   6   2 -12 96.2741 53.2747   1
  -6  -2  11 1718.91 51.1920   1
  -2   2 -11 2575.96 68.7116  -2
   6  -2 -11 2575.96 68.7116   1
   6   2 -10 52.4170 21.7958   1
   3  -2   9 3573.34 43.9936  -2
  -6   2   9 3573.34 43.9936   1
  -6   2   8 180.956 16.7116   1
  -6  -2   7 2477.08 25.1053   1
   4   2   6 147.927 18.0450  -2
  -6  -2   6 147.927 18.0450   1
  -6  -2   5 867.566 16.2788   1
   6  -2  -4 131.311 12.1456   1
  -5   2  -3 532.407 19.9045  -2
   6  -2  -3 532.407 19.9045   1
   6  -2  -2 202.982 10.1760   1
  -6  -2   1 284.452 20.5997   1
  -6  -2   0 6.33152 12.4846  -2
   6   2   0 6.33152 12.4846   1
   6   2   1 1061.64 18.1810   1
   6   2   2 93.3542 13.5218   1
  -7  -2   3 4475.02 48.6597  -2
   6   2   3 4475.02 48.6597   1
   6  -2   4-1.97302 16.0115   1
   6  -2   5 1280.35 22.9127   1
  -8   2   6 216.100 24.1854  -2
   6  -2   6 216.100 24.1854   1
   6   2   7 76.6021 19.8980   1
   6   2   8-4.63117 20.7844   1
   9   2  -9 1671.34 41.0120  -2
  -6  -2  -9 1671.34 41.0120   1
   6   2  10-8.11981 25.7377   1
   6  -2  11 637.520 41.5513   1
  10   2 -11 993.874 83.8659  -2
  -6  -2 -11 993.874 83.8659   1
  10   2 -12 268.057 80.3021  -2
  -6  -2 -12 268.057 80.3021   1
  -6  -2 -13 328.559 63.6855   1
  11   2 -14 117.860 85.9490  -2
  -6  -2 -14 117.860 85.9490   1
  11   2 -15 788.910 100.891  -2
  -6  -2 -15 788.910 100.891   1
  -6  -2 -16 31.6347 72.4007   1
  12   2 -17 779.625 118.948  -2
  -6  -2 -17 779.625 118.948   1
  12   2 -18 136.976 113.391  -2
  -6  -2 -18 136.976 113.391   1
  -6  -2 -19 3.81891 87.5117   1
  13   2 -20 115.708 124.055  -2
  -6  -2 -20 115.708 124.055   1
   6  -3 -22-24.6516 64.9067   1
   1   3 -21 117.424 86.8919  -2
   6  -3 -21 117.424 86.8919   1
   1   3 -20 99.0051 83.1820  -2
   6  -3 -20 99.0051 83.1820   1
   6  -3 -19-21.2585 55.7322   1
   0  -3 -18 702.930 80.0586  -2
   6   3 -18 702.930 80.0586   1
   0  -3 -17 564.592 74.7967  -2
   6   3 -17 564.592 74.7967   1
   6  -3 -16 697.733 56.8238   1
  -1  -3 -15 216.255 64.3395  -2
   6   3 -15 216.255 64.3395   1
  -1  -3 -14 2266.97 78.0341  -2
   6   3 -14 2266.97 78.0341   1
   6  -3 -13 206.309 41.8450   1
  -2   3 -12 918.650 49.9247  -2
   6  -3 -12 918.650 49.9247   1
  -6  -3  11 273.178 43.4119   1
  -2  -3 -11 866.540 46.0788  -2
   6   3 -11 866.540 46.0788   1
   6  -3 -10 44.6377 23.2183   1
  -3   3  -9 407.795 32.0102  -2
   6  -3  -9 407.795 32.0102   1
  -6   3   8 24.6017 16.3986   1
  -3   3  -8 354.340 68.8885  -2
   6  -3  -8 354.340 68.8885   1
   6  -3  -7 194.257 15.5260   1
  -4   3  -6 802.211 23.2279  -2
   6  -3  -6 802.211 23.2279   1
  -6  -3   5 166.330 12.8676   1
  -6  -3   4 2195.35 18.7004   1
  -5   3  -3 962.927 18.1600  -2
   6  -3  -3 962.927 18.1600   1
   6  -3  -2 2253.04 28.9689   1
   6  -3  -1 93.4165 16.7182   1
  -6   3   0 2481.48 42.3936  -2
   6  -3   0 2481.48 42.3936   1
   6   3   1 285.942 18.0153   1
   6  -3   2 6.95953 10.6072   1
  -7  -3   3 1661.14 34.6774  -2
   6   3   3 1661.14 34.6774   1
   6  -3   4 179.098 14.0976   1
  -6  -3  -5 729.174 19.0867   1
  -8   3   6 1741.48 35.8339  -2
   6  -3   6 1741.48 35.8339   1
   6   3   7 1599.55 29.3075   1
   6  -3   8 428.462 23.3934   1
  -9  -3   9 1080.65 37.9982  -2
   6   3   9 1080.65 37.9982   1
  -6  -3 -10 919.905 34.4115   1
   6  -3  11 807.058 34.8607   1
  10   3 -12 998.992 87.7793  -2
  -6  -3 -12 998.992 87.7793   1
  -6  -3 -13 144.317 60.1466   1
  11   3 -14 229.501 87.0357  -2
  -6  -3 -14 229.501 87.0357   1
  11   3 -15 14.7466 90.8322  -2
  -6  -3 -15 14.7466 90.8322   1
  -6  -3 -16 256.462 75.6738   1
  12   3 -17 87.7320 103.599  -2
  -6  -3 -17 87.7320 103.599   1
  12   3 -18 494.539 117.436  -2
  -6  -3 -18 494.539 117.436   1
  -6  -3 -19 139.980 87.0830   1
  13   3 -20 859.307 140.188  -2
  -6  -3 -20 859.307 140.188   1
   6  -4 -22 264.751 71.2141   1
   1   4 -21 229.200 88.7547  -2
   6  -4 -21 229.200 88.7547   1
   1  -4 -20 657.929 93.4200  -2
   6   4 -20 657.929 93.4200   1
   6   4 -19 160.995 59.8225   1
   0  -4 -18 315.756 77.0984  -2
   6   4 -18 315.756 77.0984   1
   0  -4 -17 136.410 70.5384  -2
   6   4 -17 136.410 70.5384   1
   6  -4 -16 12.1462 48.1938   1
  -1  -4 -15 477.852 66.8955  -2
   6   4 -15 477.852 66.8955   1
  -1  -4 -14 839.005 68.1767  -2
   6   4 -14 839.005 68.1767   1
   6  -4 -13-5.98072 40.9297   1
  -2   4 -12 1545.39 54.8503  -2
   6  -4 -12 1545.39 54.8503   1
  -6  -4  11 12.6216 31.8438   1
  -2  -4 -11 385.083 54.4634  -2
   6   4 -11 385.083 54.4634   1
   6  -4 -10 2025.46 36.9653   1
  -3   4  -9 418.209 31.8120  -2
   6  -4  -9 418.209 31.8120   1
   6  -4  -8 1437.31 28.4291   1
  -3   4  -8 1440.95 84.1705  -2
   6  -4  -8 1440.95 84.1705   1
   6  -4  -7 201.333 16.1066   1
  -4   4  -6 2390.31 30.9429  -2
   6  -4  -6 2390.31 30.9429   1
   6  -4  -5 6.75423 12.3286   1
  -6  -4   4 539.482 15.5065   1
  -5  -4  -3 472.345 26.2656  -2
   6   4  -3 472.345 26.2656   1
  -6  -4   2 268.429 16.5712   1
   6   4  -1 4.38669 14.7097   1
  -6   4   0 2167.75 38.4206  -2
   6  -4   0 2167.75 38.4206   1
  -6  -4  -1 233.389 15.5843   1
   6   4   2 1120.08 17.1094   1
  -7   4   3 647.556 20.2334  -2
   6  -4   3 647.556 20.2334   1
   6  -4   4 1214.51 20.2533   1
   6   4   5 99.5517 14.8549   1
   8   4  -6 455.097 25.7921  -2
  -6  -4  -6 455.097 25.7921   1
   6   4   7 6.12788 16.9788   1
   6   4   8 10.9988 21.1357   1
  -9  -4   8 792.772 60.8953  -2
   6   4   8 792.772 60.8953   1
  -9  -4   9 154.520 28.8178  -2
   6   4   9 154.520 28.8178   1
   6   4  10 604.663 30.5507   1
   6   4  11 296.027 29.0029   1
 -10   4  12 761.768 44.3254  -2
   6  -4  12 761.768 44.3254   1
   6   4  13 254.691 31.6505   1
 -11  -4  14 968.179 49.8159  -2
   6   4  14 968.179 49.8159   1
  11   4 -15 194.074 94.3246  -2
  -6  -4 -15 194.074 94.3246   1
   6   4  16 228.194 41.7336   1
  12   4 -17 63.0918 105.308  -2
  -6  -4 -17 63.0918 105.308   1
  12   4 -18 509.820 117.618  -2
  -6  -4 -18 509.820 117.618   1
  -6  -4 -19 99.7162 85.7179   1
  13   4 -20 6.40502 123.227  -2
  -6  -4 -20 6.40502 123.227   1
   6   5 -22 76.6874 91.0869   1
   1   5 -21 250.569 89.9989  -2
   6  -5 -21 250.569 89.9989   1
   1  -5 -20 127.295 83.8593  -2
   6   5 -20 127.295 83.8593   1
   6   5 -19 240.999 61.5960   1
   0  -5 -18 301.079 78.2417  -2
   6   5 -18 301.079 78.2417   1
   0  -5 -17 1038.25 85.0165  -2
   6   5 -17 1038.25 85.0165   1
   6   5 -16 98.2243 49.6733   1
  -1  -5 -15 830.418 71.0797  -2
   6   5 -15 830.418 71.0797   1
  -1   5 -14 217.064 62.8196  -2
   6  -5 -14 217.064 62.8196   1
   6  -5 -13 588.355 39.8517   1
  -2   5 -12 196.133 44.3404  -2
   6  -5 -12 196.133 44.3404   1
  -2  -5 -11 852.773 46.4256  -2
   6   5 -11 852.773 46.4256   1
  -6  -5  10 120.881 24.5414   1
  -3  -5  -9 572.637 33.0480  -2
   6   5  -9 572.637 33.0480   1
   6  -5  -8 7.67707 17.6766   1
   6  -5  -7 698.425 20.9242   1
  -4   5  -6 82.2683 24.5796  -2
   6  -5  -6 82.2683 24.5796   1
   6  -5  -5 2291.82 26.6571   1
   6  -5  -4 69.5826 11.5567   1
   5   5   3 4130.67 27.7919  -2
  -6  -5   3 4130.67 27.7919   1
   6  -5  -2 68.0645 20.7442   1
  -6  -5   1 1367.34 23.6766   1
   6   5   0 587.336 23.6690  -2
  -6  -5   0 587.336 23.6690   1
  -6  -5  -1 38.9577 12.0579   1
  -6  -5  -2 294.096 12.1922   1
  -7   5   3 134.336 14.3993  -2
   6  -5   3 134.336 14.3993   1
   6   5   4 99.1445 11.7774   1
   6   5   5 300.154 14.8599   1
  -8   5   6 368.789 23.7251  -2
   6  -5   6 368.789 23.7251   1
   6   5   7 1226.89 25.0743   1
   6   5   8 136.292 18.7321   1
  -9  -5   9 892.169 34.3611  -2
   6   5   9 892.169 34.3611   1
   6   5  10 196.381 25.2998   1
  -6  -5 -11 469.200 44.7711   1
 -10  -5  11 1902.33 66.8806  -2
   6   5  11 1902.33 66.8806   1
 -10  -5  12 81.5133 36.7768  -2
   6   5  12 81.5133 36.7768   1
   6  -5  13-6.35799 27.7156   1
 -11   5  14 9.95301 40.6828  -2
   6  -5  14 9.95301 40.6828   1
 -11   5  15 725.845 50.7654  -2
   6  -5  15 725.845 50.7654   1
  -6  -5 -16 42.8281 50.7223   1
 -12   5  17 707.231 81.8205  -2
   6  -5  17 707.231 81.8205   1
 -12   5  18 4.00442 76.4974  -2
   6  -5  18 4.00442 76.4974   1
  -6  -5 -19 298.123 92.3880   1
   6   6 -22 109.025 92.6484   1
   6   6 -21 389.360 97.9804   1
   1   6 -21 467.893 141.356  -2
   6  -6 -21 467.893 141.356   1
   1  -6 -20 621.452 94.7293  -2
   6   6 -20 621.452 94.7293   1
   6   6 -19 674.382 68.3237   1
   0  -6 -18 252.463 80.0625  -2
   6   6 -18 252.463 80.0625   1
   0  -6 -17 211.128 74.8333  -2
   6   6 -17 211.128 74.8333   1
   6   6 -16 161.414 52.2164   1
  -1  -6 -15 646.929 69.9023  -2
   6   6 -15 646.929 69.9023   1
  -1   6 -14 446.431 65.5392  -2
   6  -6 -14 446.431 65.5392   1
   6  -6 -13 26.0474 34.2559   1
  -2  -6 -12 44.0689 43.5745  -2
   6   6 -12 44.0689 43.5745   1
  -2  -6 -11 1340.77 50.7839  -2
   6   6 -11 1340.77 50.7839   1
   6  -6 -10 20.5590 27.5502   1
  -3   6  -9 1517.86 48.9728  -2
   6  -6  -9 1517.86 48.9728   1
  -6  -6   8 157.893 22.3582   1
   6  -6  -7 629.049 24.9824   1
   4   6   6 491.816 28.7029  -2
  -6  -6   6 491.816 28.7029   1
   6  -6  -5 186.340 17.6066   1
   6  -6  -4 232.662 15.9579   1
   5   6   3 179.675 15.8152  -2
  -6  -6   3 179.675 15.8152   1
  -6  -6   2 558.067 8.55826   1
  -6  -6   1 451.438 22.2379   1
   6   6   0 2534.49 45.0638  -2
  -6  -6   0 2534.49 45.0638   1
   6  -6   1 644.533 11.8972   1
   6  -6   2 800.619 21.9309   1
   7   6  -3 2103.88 47.4554  -2
  -6  -6  -3 2103.88 47.4554   1
   6  -6   4 743.364 21.5432   1
   6   6   5 631.031 13.7033   1
  -8  -6   6 338.900 18.4690  -2
   6   6   6 338.900 18.4690   1
   6  -6   7 169.507 14.5703   1
  -6  -6  -8 24.3531 26.8964   1
  -9   6   8 163.278 28.3329  -2
   6  -6   8 163.278 28.3329   1
  -9  -6   9 971.256 32.5371  -2
   6   6   9 971.256 32.5371   1
   6   6  10 112.960 23.0626   1
  -6  -6 -11 375.857 55.7264   1
 -10   6  11 432.641 40.1462  -2
   6  -6  11 432.641 40.1462   1
 -10  -6  12 321.863 37.7065  -2
   6   6  12 321.863 37.7065   1
  -6  -6 -13 510.726 32.6813   1
 -11   6  14 593.064 70.5444  -2
   6  -6  14 593.064 70.5444   1
 -11   6  15 582.018 73.8410  -2
   6  -6  15 582.018 73.8410   1
   6  -6  16 207.706 54.4990   1
  12   6 -17 570.592 81.9019  -2
  -6  -6 -17 570.592 81.9019   1
  12   6 -18 147.371 115.086  -2
  -6  -6 -18 147.371 115.086   1
  -6  -6 -19 26.6735 88.3347   1
   1   7 -20 242.447 132.738  -2
   6  -7 -20 242.447 132.738   1
   6  -7 -19 53.6420 89.5781   1
   0   7 -18 463.026 126.155  -2
   6  -7 -18 463.026 126.155   1
   0   7 -17 114.103 117.707  -2
   6  -7 -17 114.103 117.707   1
   6  -7 -16 446.789 87.3403   1
  -1   7 -15 13.8333 104.290  -2
   6  -7 -15 13.8333 104.290   1
  -1   7 -14 940.807 111.751  -2
   6  -7 -14 940.807 111.751   1
   6  -7 -13 11.6670 45.6547   1
  -2   7 -12 1730.84 74.1527  -2
   6  -7 -12 1730.84 74.1527   1
  -2   7 -11 148.993 58.1426  -2
   6  -7 -11 148.993 58.1426   1
   6  -7 -10 27.1119 29.2423   1
  -3   7  -9 11.0554 37.0948  -2
   6  -7  -9 11.0554 37.0948   1
   6  -7  -8 282.296 28.9581   1
   6  -7  -7 6.50262 20.0926   1
   4   7   6 936.187 33.3400  -2
  -6  -7   6 936.187 33.3400   1
   6  -7  -5-10.3454 17.2336   1
   6  -7  -4 3372.45 34.1772   1
   5   7   3 107.907 19.9057  -2
  -6  -7   3 107.907 19.9057   1
  -6  -7   2 2138.60 18.6922   1
  -6  -7   1 2.62503 7.64750   1
   6   7   0 1603.10 33.5709  -2
  -6  -7   0 1603.10 33.5709   1
   6  -7   1 13.6200 14.5741   1
  -6  -7  -2 16.3244 17.6160   1
  -7   7   3 75.2214 30.5490  -2
   6  -7   3 75.2214 30.5490   1
   6  -7   4 13.6202 24.7701   1
   6  -7   5 2.03634 18.7394   1
   8   7  -6 1730.80 44.3194  -2
  -6  -7  -6 1730.80 44.3194   1
  -6  -7  -7-1.96849 22.0128   1
   6   7   8 601.257 30.2612   1
  -9  -7   8 500.742 16.7956  -2
   6   7   8 500.742 16.7956   1
  -9  -7   9 32.8955 18.0216  -2
   6   7   9 32.8955 18.0216   1
  -6  -7 -10 671.945 47.3215   1
  -6  -7 -11 27.9100 51.3439   1
 -10   7  11 79.8338 90.3066  -2
   6  -7  11 79.8338 90.3066   1
 -10   7  12 681.217 64.8864  -2
   6  -7  12 681.217 64.8864   1
   6  -7  13 23.3485 46.4087   1
  11   7 -14 440.760 70.6728  -2
  -6  -7 -14 440.760 70.6728   1
 -11   7  15 30.0456 67.1964  -2
   6  -7  15 30.0456 67.1964   1
   6  -7  16 308.986 56.9083   1
  12   7 -17-65.9636 106.916  -2
  -6  -7 -17-65.9636 106.916   1
   6  -8 -19 299.475 95.1240   1
   0   8 -18 410.919 127.035  -2
   6  -8 -18 410.919 127.035   1
   0   8 -17 124.727 116.127  -2
   6  -8 -17 124.727 116.127   1
   6  -8 -16 53.9675 81.3863   1
  -1   8 -15 386.311 110.008  -2
   6  -8 -15 386.311 110.008   1
  -1   8 -14 863.604 75.0137  -2
   6  -8 -14 863.604 75.0137   1
   6  -8 -13 71.1607 46.4586   1
  -2   8 -12 788.738 66.9025  -2
   6  -8 -12 788.738 66.9025   1
  -2   8 -11 385.699 62.3573  -2
   6  -8 -11 385.699 62.3573   1
   6  -8 -10 604.997 49.1711   1
  -3   8  -9 807.383 46.9418  -2
   6  -8  -9 807.383 46.9418   1
   6  -8  -8 314.547 31.2879   1
   6  -8  -7 517.230 25.5486   1
  -4   8  -6 894.557 35.0050  -2
   6  -8  -6 894.557 35.0050   1
   6  -8  -5 32.4821 18.8294   1
   6  -8  -4-9.59538 16.9784   1
   5   8   3 193.779 18.8910  -2
  -6  -8   3 193.779 18.8910   1
   6  -8  -2 137.808 11.4586   1
  -6  -8   1 158.980 10.4979   1
  -6   8   0 1042.02 37.9043  -2
   6  -8   0 1042.02 37.9043   1
  -6  -8  -1 596.472 25.0684   1
   6  -8   2 430.065 25.3272   1
  -7   8   3 1314.03 47.6514  -2
   6  -8   3 1314.03 47.6514   1
   6  -8   4 574.495 64.2380   1
  -6  -8  -5 563.263 34.5402   1
   8   8  -6 218.515 44.8888  -2
  -6  -8  -6 218.515 44.8888   1
  -6  -8  -7 10.0527 23.0920   1
   6  -8   8 15.2043 35.0721   1
  -9   8   9 290.199 54.0485  -2
   6  -8   9 290.199 54.0485   1
   6  -8  10 127.817 40.7473   1
  -6  -8 -11 230.092 57.5860   1
 -10   8  11 169.852 94.7895  -2
   6  -8  11 169.852 94.7895   1
  10   8 -12 777.675 69.6830  -2
  -6  -8 -12 777.675 69.6830   1
  -6  -8 -13 355.981 51.5746   1
  11   8 -14 676.606 73.5900  -2
  -6  -8 -14 676.606 73.5900   1
  11   8 -15 266.797 72.7630  -2
  -6  -8 -15 266.797 72.7630   1
   6  -8  16 340.095 88.4840   1
   0   9 -18 50.3741 124.250  -2
   6  -9 -18 50.3741 124.250   1
   0   9 -17 863.261 136.174  -2
   6  -9 -17 863.261 136.174   1
   6  -9 -16 39.2310 84.7079   1
  -1   9 -15 837.949 124.484  -2
   6  -9 -15 837.949 124.484   1
  -1   9 -14 25.8482 68.6361  -2
   6  -9 -14 25.8482 68.6361   1
   6  -9 -13 591.101 55.6002   1
  -2   9 -12 345.922 62.7347  -2
   6  -9 -12 345.922 62.7347   1
  -2   9 -11 538.677 65.6434  -2
   6  -9 -11 538.677 65.6434   1
   6  -9 -10 7.46136 41.9033   1
  -3   9  -9 662.473 67.7668  -2
   6  -9  -9 662.473 67.7668   1
   6  -9  -8 23.9960 29.4813   1
   6  -9  -7 307.517 24.1899   1
  -4   9  -6 189.598 30.6340  -2
   6  -9  -6 189.598 30.6340   1
  -6  -9   5 761.021 25.7901   1
   6  -9  -4 120.854 19.1671   1
  -5   9  -3 3887.08 42.3133  -2
   6  -9  -3 3887.08 42.3133   1
  -6  -9   2 29.9697 11.7757   1
   6  -9  -1 1487.58 35.4456   1
  -6   9   0 16.4149 24.9854  -2
   6  -9   0 16.4149 24.9854   1
   6  -9   1 560.197 62.2392   1
   6  -9   2 95.6698 24.7426   1
   7   9  -3 114.870 36.2204  -2
  -6  -9  -3 114.870 36.2204   1
  -6  -9  -4 108.971 28.8303   1
   6  -9   5 205.156 32.1041   1
   8   9  -6 88.1344 44.4834  -2
  -6  -9  -6 88.1344 44.4834   1
   6  -9   7 484.635 39.8225   1
  -6  -9  -8 45.9593 44.1512   1
  -9   9   8 97.8516 87.4846  -2
   6  -9   8 97.8516 87.4846   1
  -9   9   9 637.567 61.3125  -2
   6  -9   9 637.567 61.3125   1
  -6  -9 -10 26.1573 41.3634   1
  -6  -9 -11 177.845 58.8906   1
 -10   9  11 1061.40 115.084  -2
   6  -9  11 1061.40 115.084   1
  10   9 -12 57.4937 64.4164  -2
  -6  -9 -12 57.4937 64.4164   1
   6  -9  13 13.6642 48.0275   1
 -11   9  14 91.2584 108.900  -2
   6  -9  14 91.2584 108.900   1
 -11   9  15 930.845 124.808  -2
   6  -9  15 930.845 124.808   1
   0  10 -17 65.5228 124.417  -2
   6 -10 -17 65.5228 124.417   1
   6 -10 -16 59.4076 88.6084   1
  -1  10 -15 285.201 132.740  -2
   6 -10 -15 285.201 132.740   1
  -1  10 -14 257.054 73.1851  -2
   6 -10 -14 257.054 73.1851   1
   6 -10 -13 23.0355 48.6609   1
  -2  10 -12 364.052 67.0236  -2
   6 -10 -12 364.052 67.0236   1
  -2  10 -11 218.644 64.4177  -2
   6 -10 -11 218.644 64.4177   1
   6 -10 -10 825.470 56.0512   1
  -3  10  -9 377.892 64.7567  -2
   6 -10  -9 377.892 64.7567   1
   6 -10  -8 353.985 46.8413   1
   6 -10  -7 1.29081 29.6655   1
  -4  10  -6 845.739 38.6230  -2
   6 -10  -6 845.739 38.6230   1
   6 -10  -5 12.8249 20.9083   1
  -6 -10   4 2.68270 19.5981   1
   5  10   3 154.288 21.4570  -2
  -6 -10   3 154.288 21.4570   1
   6 -10  -2 80.8765 17.9310   1
  -6 -10   1 241.703 27.0881   1
  -6  10   0 1901.38 47.0842  -2
   6 -10   0 1901.38 47.0842   1
   6 -10   1 836.113 35.1150   1
   6 -10   2 727.231 35.0660   1
  -7  10   3 607.637 47.8564  -2
   6 -10   3 607.637 47.8564   1
   6 -10   4 585.783 36.1889   1
  -6 -10  -5 51.8076 31.9243   1
  -8  10   6 261.655 50.0014  -2
   6 -10   6 261.655 50.0014   1
   6 -10   7 12.5954 35.3618   1
  -6 -10  -8 26.5897 47.0981   1
  -9  10   8 601.942 101.785  -2
   6 -10   8 601.942 101.785   1
   9  10  -9 23.3613 56.5352  -2
  -6 -10  -9 23.3613 56.5352   1
  -6 -10 -10 56.2329 43.6038   1
 -10  10  11 451.506 109.428  -2
   6 -10  11 451.506 109.428   1
 -10  10  12 566.313 115.633  -2
   6 -10  12 566.313 115.633   1
   6 -10  13 610.450 93.3645   1
 -11  10  14 626.525 124.273  -2
   6 -10  14 626.525 124.273   1
   6 -11 -16 462.013 98.0700   1
  -1  11 -15-82.4774 122.273  -2
   6 -11 -15-82.4774 122.273   1
  -1  11 -14 940.968 82.0037  -2
   6 -11 -14 940.968 82.0037   1
   6 -11 -13 12.1156 51.6876   1
  -2  11 -12 1240.92 79.4450  -2
   6 -11 -12 1240.92 79.4450   1
  -2  11 -11 106.762 66.8463  -2
   6 -11 -11 106.762 66.8463   1
   6 -11 -10 2.52224 45.9344   1
  -3  11  -9 35.4778 64.7470  -2
   6 -11  -9 35.4778 64.7470   1
   6 -11  -8 229.562 46.8727   1
   6 -11  -7 24.3885 40.9533   1
  -4  11  -6 607.324 67.0784  -2
   6 -11  -6 607.324 67.0784   1
   6 -11  -5 13.3372 41.5462   1
  -6 -11   4 1514.66 40.0370   1
  -5  11  -3 120.685 35.7425  -2
   6 -11  -3 120.685 35.7425   1
  -6 -11   2 1304.41 37.0309   1
  -6 -11   1 16.7528 25.3097   1
   6  11   0 1492.92 47.8028  -2
  -6 -11   0 1492.92 47.8028   1
   6 -11   1 44.5467 28.9781   1
   6 -11   2 39.7770 29.0931   1
  -7  11   3 248.416 45.8785  -2
   6 -11   3 248.416 45.8785   1
  -6 -11  -4 56.8801 32.0892   1
  -6 -11  -5 217.384 43.4402   1
  -8  11   5 329.115 90.3699  -2
   6 -11   5 329.115 90.3699   1
  -8  11   6 1155.69 63.3861  -2
   6 -11   6 1155.69 63.3861   1
   6 -11   7 256.635 41.1557   1
  -9  11   8 323.602 101.274  -2
   6 -11   8 323.602 101.274   1
  -9  11   9 110.842 101.639  -2
   6 -11   9 110.842 101.639   1
   6 -11  10 454.134 84.8811   1
 -10  11  11 17.9040 108.257  -2
   6 -11  11 17.9040 108.257   1
 -10  11  12 875.310 121.227  -2
   6 -11  12 875.310 121.227   1
   6 -11  13 165.637 85.3898   1
  -1  12 -15 182.047 129.008  -2
   6 -12 -15 182.047 129.008   1
  -1  12 -14 221.937 77.6982  -2
   6 -12 -14 221.937 77.6982   1
   6 -12 -13 162.035 55.2985   1
  -2  12 -12 1092.27 79.3356  -2
   6 -12 -12 1092.27 79.3356   1
  -2  12 -11 756.872 75.9270  -2
   6 -12 -11 756.872 75.9270   1
   6 -12 -10 29.8187 49.6510   1
  -3  12  -9 1421.73 82.5271  -2
   6 -12  -9 1421.73 82.5271   1
   6 -12  -8 269.081 49.3950   1
   6 -12  -7 660.993 54.9142   1
  -4  12  -6 127.365 62.2138  -2
   6 -12  -6 127.365 62.2138   1
   6 -12  -5 166.887 45.4189   1
   6 -12  -4 4.68738 27.3940   1
   5  12   3 60.0448 37.4209  -2
  -6 -12   3 60.0448 37.4209   1
   6 -12  -2 46.6450 26.4876   1
   6 -12  -1 29.9686 27.9240   1
   6  12   0 177.546 36.9575  -2
  -6 -12   0 177.546 36.9575   1
  -6 -12  -1 782.307 59.3114   1
   6 -12   2 199.672 65.0900   1
  -7  12   3 1419.92 118.988  -2
   6 -12   3 1419.92 118.988   1
   6 -12   4 67.8984 64.3322   1
   6 -12   5 271.439 72.5793   1
  -8  12   6 20.3996 82.9209  -2
   6 -12   6 20.3996 82.9209   1
   6 -12   7 22.7314 72.0164   1
  -9  12   8 128.969 104.224  -2
   6 -12   8 128.969 104.224   1
  -9  12   9 658.458 116.269  -2
   6 -12   9 658.458 116.269   1
   6 -12  10 99.5558 78.7988   1
 -10  12  11 231.925 110.066  -2
   6 -12  11 231.925 110.066   1
   6 -13 -13 387.528 99.1608   1
  -2  13 -12 308.216 129.320  -2
   6 -13 -12 308.216 129.320   1
  -2  13 -11 376.350 73.4014  -2
   6 -13 -11 376.350 73.4014   1
   6 -13 -10-1.08630 50.4580   1
  -3  13  -9 557.684 75.8653  -2
   6 -13  -9 557.684 75.8653   1
   6 -13  -8-4.06675 48.7097   1
   6 -13  -7 170.434 50.3154   1
  -4  13  -6 180.921 67.0282  -2
   6 -13  -6 180.921 67.0282   1
   6 -13  -5 449.923 52.0150   1
   6 -13  -4-2.72534 45.8527   1
  -5  13  -3 1212.37 84.1470  -2
   6 -13  -3 1212.37 84.1470   1
   6 -13  -2 48.6949 45.8953   1
   6 -13  -1 465.155 52.0665   1
  -6  13   0-33.6723 62.7258  -2
   6 -13   0-33.6723 62.7258   1
   6 -13   1 18.4688 61.6062   1
   6 -13   2-14.3436 64.6297   1
  -7  13   3 116.747 93.5541  -2
   6 -13   3 116.747 93.5541   1
   6 -13   4 108.364 69.4194   1
  -8  13   5 784.929 107.228  -2
   6 -13   5 784.929 107.228   1
  -8  13   6 397.309 108.852  -2
   6 -13   6 397.309 108.852   1
   6 -13   7 415.130 82.2369   1
  -9  13   8 287.984 109.489  -2
   6 -13   8 287.984 109.489   1
  -9  13   9 380.084 116.108  -2
   6 -13   9 380.084 116.108   1
   6 -13  10 205.076 84.5115   1
  -2  14 -11 115.179 124.505  -2
   6 -14 -11 115.179 124.505   1
   6 -14 -10 941.226 106.626   1
  -3  14  -9 113.493 120.925  -2
   6 -14  -9 113.493 120.925   1
   6 -14  -8 793.915 62.0860   1
   6 -14  -7 146.588 51.0820   1
  -4  14  -6 867.849 79.2565  -2
   6 -14  -6 867.849 79.2565   1
   6 -14  -5 33.1118 47.5146   1
   6 -14  -4 51.1959 47.2781   1
  -5  14  -3-24.7182 65.1852  -2
   6 -14  -3-24.7182 65.1852   1
   6 -14  -2 13.9334 48.0499   1
   6 -14  -1 19.7992 48.5459   1
  -6  14   0 475.260 66.8678  -2
   6 -14   0 475.260 66.8678   1
   6 -14   1 51.9487 49.4020   1
   6 -14   2 628.013 81.3754   1
  -7  14   3 97.5337 94.7919  -2
   6 -14   3 97.5337 94.7919   1
   6 -14   4 452.246 78.7689   1
   6 -14   5 38.7973 74.5439   1
  -8  14   6 163.391 95.3108  -2
   6 -14   6 163.391 95.3108   1
   6 -14   7-53.8716 77.2839   1
  -9  14   8 733.353 120.023  -2
   6 -14   8 733.353 120.023   1
  -9  14   9 47.8086 108.427  -2
   6 -14   9 47.8086 108.427   1
   6 -15  -8-20.2581 85.7169   1
   6 -15  -7 73.9603 85.2671   1
  -4  15  -6 125.864 113.690  -2
   6 -15  -6 125.864 113.690   1
   6 -15  -5 258.719 54.7107   1
   6 -15  -4 292.721 55.5462   1
  -5  15  -3 457.119 78.6665  -2
   6 -15  -3 457.119 78.6665   1
   6 -15  -2 63.5091 52.5593   1
   6 -15  -1 104.553 51.8208   1
  -6  15   0 32.4313 60.5431  -2
   6 -15   0 32.4313 60.5431   1
   6 -15   1 18.8287 52.0524   1
   6 -15   2-14.1686 53.4476   1
  -7  15   3 235.514 102.625  -2
   6 -15   3 235.514 102.625   1
   6 -15   4 215.938 80.3456   1
   6 -15   5 336.721 84.4669   1
  -8  15   6 618.890 120.156  -2
   6 -15   6 618.890 120.156   1
   6 -15   7 290.906 79.0637   1
   6 -16  -1-63.2759 72.2322   1
  -6  16   0 27.5624 72.1186  -2
   6 -16   0 27.5624 72.1186   1
   6 -16   1 213.861 77.3720   1
   6 -16   2-51.4393 73.4898   1
  -7  16   3 807.716 124.448  -2
   6 -16   3 807.716 124.448   1
   6 -16   4 15.8097 73.3364   1
   6 -16   5 228.653 82.8530   1
   7   0 -22 60.8672 89.3938   1
   0   0 -20 492.160 128.464  -2
   7   0 -20 492.160 128.464   1
  -1   0 -18 782.334 113.434  -2
   7   0 -18 782.334 113.434   1
   7   0 -16 1140.60 90.9103   1
  -2   0 -14 117.625 83.9985  -2
   7   0 -14 117.625 83.9985   1
  -3   0 -12 1042.32 86.4299  -2
   7   0 -12 1042.32 86.4299   1
  -7   0  10 358.625 29.6905   1
  -7   0   8 1388.96 51.5519   1
  -4   0  -8 2384.67 58.0090  -2
   7   0  -8 2384.67 58.0090   1
   5   0   6 5197.99 53.7074  -2
  -7   0   6 5197.99 53.7074   1
   7   0  -4 5453.62 48.7839   1
   7   0  -2 1452.81 27.8933   1
   7   0   0 839.996 45.3647  -2
  -7   0   0 839.996 45.3647   1
   7   0   2 6.23584 18.6651   1
   7   0   4 1018.22 35.6109   1
  -9   0   6 3384.13 74.5645  -2
   7   0   6 3384.13 74.5645   1
   7   0   8 1056.10 63.0590   1
   7   0  10 5.08835 48.5455   1
 -11   0  12 1362.54 91.5543  -2
   7   0  12 1362.54 91.5543   1
 -12   0  14 698.281 93.2299  -2
   7   0  14 698.281 93.2299   1
   7   0  16 465.828 72.7806   1
 -13   0  18 1127.07 114.262  -2
   7   0  18 1127.07 114.262   1
   7   1 -22 660.512 74.2469   1
   0  -1 -21 505.823 90.8139  -2
   7   1 -21 505.823 90.8139   1
   0   1 -20 752.763 93.6220  -2
   7  -1 -20 752.763 93.6220   1
   7   1 -19 159.904 58.6228   1
  -1   1 -18 253.050 75.6081  -2
   7  -1 -18 253.050 75.6081   1
  -1  -1 -17 45.0256 70.3765  -2
   7   1 -17 45.0256 70.3765   1
   7  -1 -16 44.8371 46.8007   1
  -2  -1 -15 1101.42 73.0915  -2
   7   1 -15 1101.42 73.0915   1
  -2  -1 -14 1451.79 72.1782  -2
   7   1 -14 1451.79 72.1782   1
   7   1 -13 98.4744 41.9084   1
  -3   1 -12 101.185 52.1992  -2
   7  -1 -12 101.185 52.1992   1
  -3   1 -11 910.999 46.8689  -2
   7  -1 -11 910.999 46.8689   1
  -7  -1  10 285.368 25.2488   1
   4   1   9 1520.70 32.1164  -2
  -7  -1   9 1520.70 32.1164   1
  -7   1   8 185.511 16.7915   1
   7  -1  -7 41.7844 13.5028   1
   5   1   6 875.538 22.6640  -2
  -7  -1   6 875.538 22.6640   1
   7  -1  -5 684.524 16.9241   1
   7  -1  -4 158.068 15.3535   1
  -6   1  -3 415.196 22.0394  -2
   7  -1  -3 415.196 22.0394   1
   7   1  -2 654.654 15.7329   1
   7   1  -1 1439.29 20.9280   1
   7   1   0 1148.65 25.8224  -2
  -7  -1   0 1148.65 25.8224   1
  -7  -1  -1 1099.12 20.7777   1
  -7   1  -2 763.414 17.5001   1
  -8  -1   3 761.780 30.5906  -2
   7   1   3 761.780 30.5906   1
   7  -1   4 1167.31 26.5283   1
   7  -1   5 139.996 20.2506   1
  -9   1   6 299.322 30.6742  -2
   7  -1   6 299.322 30.6742   1
   7   1   7 25.2053 24.5682   1
   7  -1   8 220.021 27.8211   1
 -10  -1   9 936.531 55.2253  -2
   7   1   9 936.531 55.2253   1
   7  -1  10 434.174 39.9821   1
 -11   1  11 1102.26 59.8287  -2
   7  -1  11 1102.26 59.8287   1
 -11  -1  12 399.748 56.6576  -2
   7   1  12 399.748 56.6576   1
   7   1  13 592.773 47.3426   1
 -12  -1  14 549.886 61.6384  -2
   7   1  14 549.886 61.6384   1
 -12  -1  15 414.590 62.1967  -2
   7   1  15 414.590 62.1967   1
   7   1  16 285.258 48.5953   1
 -13  -1  17 169.080 66.0182  -2
   7   1  17 169.080 66.0182   1
 -13  -1  18 136.595 68.3995  -2
   7   1  18 136.595 68.3995   1
   7   1  19 12.5201 52.3435   1
   7   2 -22 23.3483 65.1730   1
   0  -2 -21 460.696 90.2950  -2
   7   2 -21 460.696 90.2950   1
   0   2 -20 23.4132 82.6357  -2
   7  -2 -20 23.4132 82.6357   1
   7   2 -19 491.958 64.7587   1
  -1   2 -18 67.9956 72.9817  -2
   7  -2 -18 67.9956 72.9817   1
  -1  -2 -17 1469.56 85.9002  -2
   7   2 -17 1469.56 85.9002   1
   7   2 -16 42.2944 46.1549   1
  -2   2 -15 1375.94 75.4704  -2
   7  -2 -15 1375.94 75.4704   1
  -2  -2 -14 77.5650 59.1195  -2
   7   2 -14 77.5650 59.1195   1
   7   2 -13 451.236 45.4507   1
  -3   2 -12 57.3438 42.8829  -2
   7  -2 -12 57.3438 42.8829   1
  -7  -2  11 7.51877 38.8404   1
  -3   2 -11 545.701 45.1005  -2
   7  -2 -11 545.701 45.1005   1
  -7  -2  10 144.258 23.1841   1
   4  -2   9 769.338 29.9193  -2
  -7   2   9 769.338 29.9193   1
  -7  -2   8 5.21726 17.2691   1
  -4   2  -8 38.7981 60.9984  -2
   7  -2  -8 38.7981 60.9984   1
  -7  -2   7 811.923 18.1800   1
  -5   2  -6 274.123 20.1646  -2
   7  -2  -6 274.123 20.1646   1
   7  -2  -5 3757.81 27.4145   1
   7  -2  -4 91.2725 14.1839   1
  -6   2  -3 4026.29 37.8481  -2
   7  -2  -3 4026.29 37.8481   1
   7   2  -2 23.0222 9.62930   1
   7   2  -1 557.189 10.3239   1
  -7  -2   0 316.051 12.3795  -2
   7   2   0 316.051 12.3795   1
   7   2   1 70.4773 12.3165   1
   7  -2   2 62.2162 13.7724   1
  -8  -2   3 344.907 25.8727  -2
   7   2   3 344.907 25.8727   1
   7  -2   4 351.972 20.2141   1
   7  -2   5 591.995 23.2061   1
  -9  -2   6 163.399 31.2592  -2
   7   2   6 163.399 31.2592   1
   7   2   7 351.837 26.3051   1
   7  -2   8 82.9167 24.7187   1
  10   2  -9 455.421 39.5998  -2
  -7  -2  -9 455.421 39.5998   1
   7   2  10 0.04254 27.5985   1
   7   2  11 127.245 30.6106   1
 -11  -2  12 31.4791 41.4451  -2
   7   2  12 31.4791 41.4451   1
   7  -2  13 182.833 33.8554   1
 -12  -2  14 8.04216 46.8756  -2
   7   2  14 8.04216 46.8756   1
 -12  -2  15 989.552 58.1950  -2
   7   2  15 989.552 58.1950   1
  -7  -2 -16 14.9929 37.5502   1
 -13  -2  17 1182.88 79.2121  -2
   7   2  17 1182.88 79.2121   1
 -13  -2  18 22.4733 64.9120  -2
   7   2  18 22.4733 64.9120   1
   7  -2  19 405.933 88.3146   1
   7  -3 -22 505.536 73.0758   1
   0   3 -21 537.020 92.1800  -2
   7  -3 -21 537.020 92.1800   1
   0  -3 -20 536.532 90.3411  -2
   7   3 -20 536.532 90.3411   1
   7  -3 -19 180.903 60.6598   1
  -1  -3 -18 448.071 77.5765  -2
   7   3 -18 448.071 77.5765   1
  -1  -3 -17 178.148 70.1339  -2
   7   3 -17 178.148 70.1339   1
   7   3 -16 18.2804 47.0747   1
  -2   3 -15 664.128 67.5719  -2
   7  -3 -15 664.128 67.5719   1
  -2   3 -14 855.487 66.9060  -2
   7  -3 -14 855.487 66.9060   1
   7  -3 -13 14.8784 33.1075   1
  -3   3 -12 1219.88 53.2975  -2
   7  -3 -12 1219.88 53.2975   1
  -7  -3  11 32.5716 40.0855   1
  -3   3 -11 155.732 41.6426  -2
   7  -3 -11 155.732 41.6426   1
   7   3 -10 834.524 29.1074   1
  -4   3  -9 584.891 32.9603  -2
   7  -3  -9 584.891 32.9603   1
   7   3  -8 649.205 24.1182   1
  -7  -3   7 11.4701 13.7833   1
  -5   3  -6 1070.70 24.9704  -2
   7  -3  -6 1070.70 24.9704   1
  -7  -3   5 298.581 12.8579   1
   7   3  -4 170.813 9.25275   1
  -6  -3  -3 1547.80 37.4552  -2
   7   3  -3 1547.80 37.4552   1
  -7  -3   2 1145.95 24.6210   1
  -7  -3   1 1349.76 28.4793   1
  -7  -3   0 3021.48 50.7321  -2
   7   3   0 3021.48 50.7321   1
   7  -3   1 600.509 22.9297   1
   7   3   2 713.990 16.4481   1
  -8  -3   3 502.797 27.3522  -2
   7   3   3 502.797 27.3522   1
   7   3   4 510.109 20.1023   1
   7   3   5 26.2720 18.7627   1
  -9  -3   6 224.498 26.1676  -2
   7   3   6 224.498 26.1676   1
   7  -3   7 2.29567 18.6829   1
  -7  -3  -8 261.121 22.2820   1
 -10   3   9 352.110 37.5067  -2
   7  -3   9 352.110 37.5067   1
   7  -3  10 820.784 34.8033   1
  -7  -3 -11 256.157 57.3394   1
 -11  -3  11 330.157 49.4320  -2
   7   3  11 330.157 49.4320   1
  11   3 -12 644.073 47.2496  -2
  -7  -3 -12 644.073 47.2496   1
   7   3  13 530.216 37.3480   1
  12   3 -14 892.750 53.7322  -2
  -7  -3 -14 892.750 53.7322   1
  12   3 -15 348.379 50.7109  -2
  -7  -3 -15 348.379 50.7109   1
   7   3  16 8.84671 36.2360   1
 -13   3  17 86.0380 73.8209  -2
   7  -3  17 86.0380 73.8209   1
 -13   3  18 313.509 79.7429  -2
   7  -3  18 313.509 79.7429   1
  -7  -3 -19 50.3470 89.4318   1
   7   4 -22 70.8786 89.7999   1
   0  -4 -21-8.23472 89.6452  -2
   7   4 -21-8.23472 89.6452   1
   0  -4 -20 409.846 88.9258  -2
   7   4 -20 409.846 88.9258   1
   7   4 -19 31.7544 58.0682   1
  -1  -4 -18 588.128 79.6625  -2
   7   4 -18 588.128 79.6625   1
  -1   4 -17 330.454 73.1407  -2
   7  -4 -17 330.454 73.1407   1
   7  -4 -16 1022.49 62.2580   1
  -2  -4 -15 263.243 64.6373  -2
   7   4 -15 263.243 64.6373   1
  -2  -4 -14 658.346 64.5675  -2
   7   4 -14 658.346 64.5675   1
   7   4 -13 26.8128 32.9338   1
  -3  -4 -12 709.533 49.2641  -2
   7   4 -12 709.533 49.2641   1
  -7  -4  11 12.5965 40.7602   1
  -3  -4 -11 253.221 41.8572  -2
   7   4 -11 253.221 41.8572   1
   7  -4 -10 81.7929 23.4744   1
  -4   4  -9 141.842 29.1398  -2
   7  -4  -9 141.842 29.1398   1
   7   4  -8 309.362 23.6267   1
  -4   4  -8 778.451 78.3606  -2
   7  -4  -8 778.451 78.3606   1
   7  -4  -7 54.3987 15.6744   1
   5   4   6 1556.35 28.9466  -2
  -7  -4   6 1556.35 28.9466   1
  -7  -4   5 15.5521 10.7072   1
  -7  -4   4 1455.10 16.0799   1
  -6   4  -3 632.549 29.1138  -2
   7  -4  -3 632.549 29.1138   1
  -7  -4   2 1588.70 26.4190   1
  -7  -4   1 3.53113 16.1083   1
  -7   4   0 550.666 25.4925  -2
   7  -4   0 550.666 25.4925   1
   7  -4   1 321.497 18.6548   1
   7   4   2 80.1608 8.54124   1
  -8  -4   3 447.642 23.0900  -2
   7   4   3 447.642 23.0900   1
   7   4   4 449.809 19.8340   1
   7  -4   5 626.575 19.5526   1
  -9   4   6 1203.10 32.9338  -2
   7  -4   6 1203.10 32.9338   1
   7  -4   7 552.428 22.0606   1
   7  -4   8 758.949 29.4474   1
 -10  -4   8 752.989 61.0658  -2
   7   4   8 752.989 61.0658   1
 -10  -4   9 297.173 31.2786  -2
   7   4   9 297.173 31.2786   1
  -7  -4 -10 404.133 30.5726   1
  -7  -4 -11 20.4566 51.5797   1
 -11   4  11 44.9241 43.9862  -2
   7  -4  11 44.9241 43.9862   1
 -11  -4  12 1049.47 48.0184  -2
   7   4  12 1049.47 48.0184   1
   7   4  13 26.3622 29.5090   1
  12   4 -14 237.761 45.9117  -2
  -7  -4 -14 237.761 45.9117   1
  12   4 -15 70.4420 45.3318  -2
  -7  -4 -15 70.4420 45.3318   1
   7  -4  16 502.518 58.7964   1
 -13   4  17 82.8833 74.8006  -2
   7  -4  17 82.8833 74.8006   1
 -13   4  18 655.398 85.5381  -2
   7  -4  18 655.398 85.5381   1
  -7  -4 -19 12.9110 86.2896   1
   7   5 -22 97.3345 87.3149   1
   7   5 -21 389.082 94.8353   1
   0   5 -21 510.805 139.180  -2
   7  -5 -21 510.805 139.180   1
   0  -5 -20 366.516 89.6482  -2
   7   5 -20 366.516 89.6482   1
   7   5 -19 153.468 58.1881   1
  -1  -5 -18 118.664 76.9240  -2
   7   5 -18 118.664 76.9240   1
  -1  -5 -17 149.008 73.6330  -2
   7   5 -17 149.008 73.6330   1
   7  -5 -16 0.32653 48.2025   1
  -2  -5 -15 710.373 68.8477  -2
   7   5 -15 710.373 68.8477   1
  -2  -5 -14 154.801 49.7538  -2
   7   5 -14 154.801 49.7538   1
   7   5 -13 1055.28 44.3835   1
  -3  -5 -12 265.223 44.5906  -2
   7   5 -12 265.223 44.5906   1
  -7  -5  11 1518.54 62.2002   1
  -3  -5 -11 1585.78 51.9038  -2
   7   5 -11 1585.78 51.9038   1
   7  -5 -10 7.89863 21.9634   1
  -4   5  -9 1661.05 41.0666  -2
   7  -5  -9 1661.05 41.0666   1
   7  -5  -8 8.10471 20.7273   1
  -4   5  -8 252.142 74.2628  -2
   7  -5  -8 252.142 74.2628   1
   7  -5  -7 1219.26 27.4059   1
   5   5   6 94.0789 23.5688  -2
  -7  -5   6 94.0789 23.5688   1
   7  -5  -5 14.9208 12.6490   1
  -7  -5   4 63.5103 21.8164   1
  -6   5  -3 106.664 29.5618  -2
   7  -5  -3 106.664 29.5618   1
  -7  -5   2 129.163 16.8390   1
   7  -5  -1 914.857 23.0404   1
  -7   5   0 635.962 27.6673  -2
   7  -5   0 635.962 27.6673   1
   7  -5   1 1777.08 26.6561   1
   7  -5   2 7.30556 20.1750   1
  -8  -5   3 2466.92 34.5630  -2
   7   5   3 2466.92 34.5630   1
   7   5   4 26.7154 12.0062   1
   7   5   5 170.140 15.1328   1
  -9  -5   6 159.247 22.3730  -2
   7   5   6 159.247 22.3730   1
   7   5   7-0.30539 16.7392   1
  -7  -5  -8 99.9357 23.7461   1
 -10  -5   8 68.0651 43.7725  -2
   7   5   8 68.0651 43.7725   1
 -10   5   9 1390.32 38.6432  -2
   7  -5   9 1390.32 38.6432   1
   7  -5  10 139.995 25.2528   1
  -7  -5 -11 447.901 56.9738   1
 -11  -5  11 507.565 45.6629  -2
   7   5  11 507.565 45.6629   1
  11   5 -12 331.353 40.8920  -2
  -7  -5 -12 331.353 40.8920   1
   7   5  13 382.602 33.4694   1
 -12   5  14 227.576 66.6539  -2
   7  -5  14 227.576 66.6539   1
  12   5 -15 582.285 73.5816  -2
  -7  -5 -15 582.285 73.5816   1
  -7  -5 -16 13.5213 51.4245   1
  13   5 -17 475.998 82.2497  -2
  -7  -5 -17 475.998 82.2497   1
  13   5 -18-19.9000 116.752  -2
  -7  -5 -18-19.9000 116.752   1
   7   6 -22 76.8746 93.7664   1
   7   6 -21 43.4061 86.3991   1
   0   6 -20 139.648 87.2547  -2
   7  -6 -20 139.648 87.2547   1
   7  -6 -19 198.992 61.9338   1
  -1  -6 -18 451.036 81.8928  -2
   7   6 -18 451.036 81.8928   1
  -1  -6 -17 698.290 81.7890  -2
   7   6 -17 698.290 81.7890   1
   7   6 -16 232.925 52.4081   1
  -2  -6 -15 312.895 66.4815  -2
   7   6 -15 312.895 66.4815   1
  -2  -6 -14 357.331 52.4472  -2
   7   6 -14 357.331 52.4472   1
   7  -6 -13 145.361 35.7391   1
  -3  -6 -12 1006.29 52.4712  -2
   7   6 -12 1006.29 52.4712   1
  -7  -6  11 24.7268 42.0679   1
  -3   6 -11 1211.79 50.4116  -2
   7  -6 -11 1211.79 50.4116   1
   7  -6 -10 8.54311 27.0644   1
  -4   6  -9 656.254 41.5773  -2
   7  -6  -9 656.254 41.5773   1
   7  -6  -8 9.52186 24.3956   1
   7  -6  -7 435.587 22.5581   1
  -5   6  -6 825.574 29.9710  -2
   7  -6  -6 825.574 29.9710   1
   7  -6  -5 417.190 16.8946   1
  -7  -6   4 7.94872 8.43432   1
   6   6   3 2012.66 49.9022  -2
  -7  -6   3 2012.66 49.9022   1
   7  -6  -2 47.1763 20.4224   1
  -7  -6   1 87.2370 20.5244   1
   7   6   0 522.043 31.6135  -2
  -7  -6   0 522.043 31.6135   1
   7  -6   1 85.9782 12.1788   1
   7  -6   2 1160.75 24.5566   1
  -8  -6   3 1358.23 24.4607  -2
   7   6   3 1358.23 24.4607   1
   7   6   4 772.103 14.9870   1
   7  -6   5 1138.37 18.8924   1
  -9  -6   6 1675.35 31.0775  -2
   7   6   6 1675.35 31.0775   1
   7  -6   7 793.502 20.6830   1
   7   6   8 1257.86 39.3774   1
 -10   6   8 1497.18 41.4644  -2
   7  -6   8 1497.18 41.4644   1
 -10   6   9 493.286 33.8932  -2
   7  -6   9 493.286 33.8932   1
  -7  -6 -10 377.336 25.7225   1
  -7  -6 -11 114.701 50.6740   1
 -11   6  11 682.581 44.4824  -2
   7  -6  11 682.581 44.4824   1
  11   6 -12 123.574 58.7969  -2
  -7  -6 -12 123.574 58.7969   1
   7  -6  13 29.7641 47.4414   1
  12   6 -14 42.5503 66.2999  -2
  -7  -6 -14 42.5503 66.2999   1
 -12   6  15 364.930 72.7737  -2
   7  -6  15 364.930 72.7737   1
   7  -6  16 73.2605 54.6381   1
   0   7 -20 12.6666 118.482  -2
   7  -7 -20 12.6666 118.482   1
   7  -7 -19 10.9373 91.3763   1
  -1   7 -18 139.030 123.273  -2
   7  -7 -18 139.030 123.273   1
  -1   7 -17-26.4476 115.348  -2
   7  -7 -17-26.4476 115.348   1
   7  -7 -16 83.5819 81.5313   1
  -2   7 -15-39.9737 104.621  -2
   7  -7 -15-39.9737 104.621   1
  -2   7 -14 949.377 75.9086  -2
   7  -7 -14 949.377 75.9086   1
   7  -7 -13 132.421 48.2954   1
  -3   7 -12 1449.13 76.8796  -2
   7  -7 -12 1449.13 76.8796   1
  -3   7 -11 56.7474 58.7651  -2
   7  -7 -11 56.7474 58.7651   1
   7  -7 -10 2414.55 49.5993   1
  -4   7  -9 215.137 39.1335  -2
   7  -7  -9 215.137 39.1335   1
   7  -7  -8 1188.09 36.1581   1
   7  -7  -7 2.68131 18.7953   1
  -5   7  -6 1376.01 35.5348  -2
   7  -7  -6 1376.01 35.5348   1
   7  -7  -5 133.833 16.0178   1
  -7  -7   4 32.8058 11.4837   1
  -6   7  -3 50.6271 29.9469  -2
   7  -7  -3 50.6271 29.9469   1
  -7  -7   2 360.304 22.9101   1
  -7  -7   1 31.4669 18.2790   1
  -7   7   0 1410.01 35.8643  -2
   7  -7   0 1410.01 35.8643   1
   7  -7   1 38.8145 53.1930   1
   7  -7   2 549.030 14.6037   1
   8   7  -3 18.4146 21.1822  -2
  -7  -7  -3 18.4146 21.1822   1
  -7  -7  -4 1235.71 32.4007   1
  -7  -7  -5 12.1539 24.7619   1
  -9   7   6 190.436 29.3597  -2
   7  -7   6 190.436 29.3597   1
   7   7   7-6.57644 21.4249   1
  -7  -7  -8 98.3932 39.9829   1
 -10   7   8 1502.84 107.930  -2
   7  -7   8 1502.84 107.930   1
  10   7  -9 11.9706 48.9431  -2
  -7  -7  -9 11.9706 48.9431   1
   7  -7  10 390.049 43.3652   1
  -7  -7 -11 8.58171 50.1171   1
 -11   7  11 29.0604 94.6712  -2
   7  -7  11 29.0604 94.6712   1
 -11   7  12 326.054 63.8349  -2
   7  -7  12 326.054 63.8349   1
  -7  -7 -13 27.2028 45.2267   1
  -7  -7 -14 332.598 71.6503   1
 -12   7  14 1200.20 127.121  -2
   7  -7  14 1200.20 127.121   1
 -12   7  15 155.177 108.124  -2
   7  -7  15 155.177 108.124   1
   7  -8 -19 174.374 97.0510   1
  -1   8 -18 634.663 131.174  -2
   7  -8 -18 634.663 131.174   1
  -1   8 -17 669.098 130.927  -2
   7  -8 -17 669.098 130.927   1
   7  -8 -16 329.337 90.9728   1
  -2   8 -15 145.307 73.3558  -2
   7  -8 -15 145.307 73.3558   1
  -2   8 -14 39.5897 68.5853  -2
   7  -8 -14 39.5897 68.5853   1
   7  -8 -13 204.681 50.1479   1
  -3   8 -12 748.220 70.5808  -2
   7  -8 -12 748.220 70.5808   1
  -3   8 -11 769.551 69.3697  -2
   7  -8 -11 769.551 69.3697   1
   7  -8 -10 4.86277 30.1637   1
  -4   8  -9 183.920 41.0150  -2
   7  -8  -9 183.920 41.0150   1
   7  -8  -8 386.828 30.7966   1
   7  -8  -7 183.064 21.9054   1
  -5   8  -6 788.955 32.7701  -2
   7  -8  -6 788.955 32.7701   1
  -7  -8   5 187.378 18.7184   1
  -7  -8   4 316.293 12.8188   1
   6   8   3 1161.59 18.9341  -2
  -7  -8   3 1161.59 18.9341   1
   7  -8  -2 55.0152 7.76315   1
  -7  -8   1 187.701 16.5392   1
  -7   8   0-18.5763 70.6279  -2
   7  -8   0-18.5763 70.6279   1
   7  -8   1 106.600 10.1196   1
   7  -8   2 200.532 16.0257   1
  -8   8   3 1082.43 37.9846  -2
   7  -8   3 1082.43 37.9846   1
  -7  -8  -4 847.200 32.2301   1
  -7  -8  -5 624.867 34.0334   1
  -9   8   6 1116.05 53.9891  -2
   7  -8   6 1116.05 53.9891   1
   7  -8   7 669.059 40.4829   1
  -7  -8  -8 536.697 48.4844   1
 -10   8   8 638.976 97.5771  -2
   7  -8   8 638.976 97.5771   1
  10   8  -9 273.791 54.5628  -2
  -7  -8  -9 273.791 54.5628   1
  -7  -8 -10 84.1987 40.0017   1
  -7  -8 -11 180.653 54.5449   1
 -11   8  11 506.658 107.565  -2
   7  -8  11 506.658 107.565   1
 -11   8  12 174.740 62.6359  -2
   7  -8  12 174.740 62.6359   1
   7  -8  13 5.42389 74.9217   1
 -12   8  14 172.448 108.015  -2
   7  -8  14 172.448 108.015   1
 -12   8  15 290.175 115.726  -2
   7  -8  15 290.175 115.726   1
  -1   9 -18 16.6044 124.848  -2
   7  -9 -18 16.6044 124.848   1
  -1   9 -17 155.313 124.755  -2
   7  -9 -17 155.313 124.755   1
   7  -9 -16 51.0613 89.3064   1
  -2   9 -15 511.362 79.4923  -2
   7  -9 -15 511.362 79.4923   1
  -2   9 -14 9.74515 72.0119  -2
   7  -9 -14 9.74515 72.0119   1
   7  -9 -13 950.465 63.0341   1
  -3   9 -12-29.5554 65.6858  -2
   7  -9 -12-29.5554 65.6858   1
  -3   9 -11 1548.86 78.4754  -2
   7  -9 -11 1548.86 78.4754   1
   7  -9 -10 21.7995 43.3977   1
  -4   9  -9 1420.64 77.6345  -2
   7  -9  -9 1420.64 77.6345   1
   7  -9  -8 11.3206 28.8564   1
   7  -9  -7 336.514 25.5227   1
  -5   9  -6 8.70964 27.8240  -2
   7  -9  -6 8.70964 27.8240   1
   7  -9  -5-12.6723 19.0267   1
  -7  -9   4 19.2163 12.6002   1
   6   9   3 107.603 15.2594  -2
  -7  -9   3 107.603 15.2594   1
  -7  -9   2 54.8923 9.53570   1
   7  -9  -1 732.122 11.0901   1
  -7   9   0 21.5130 13.5013  -2
   7  -9   0 21.5130 13.5013   1
   7  -9   1 700.846 22.9966   1
   7  -9   2 51.4654 18.3998   1
  -8   9   3 2101.89 52.4352  -2
   7  -9   3 2101.89 52.4352   1
   7  -9   4 17.7554 24.8228   1
   7  -9   5 120.590 29.8835   1
  -9   9   6 8.48178 42.2246  -2
   7  -9   6 8.48178 42.2246   1
   7  -9   7 5.62250 33.5369   1
  -7  -9  -8 68.7801 43.6116   1
 -10   9   8 54.7853 93.7565  -2
   7  -9   8 54.7853 93.7565   1
 -10   9   9 1135.08 65.5894  -2
   7  -9   9 1135.08 65.5894   1
   7  -9  10 14.5611 72.5091   1
 -11   9  11 573.738 111.806  -2
   7  -9  11 573.738 111.806   1
 -11   9  12 138.953 105.712  -2
   7  -9  12 138.953 105.712   1
   7  -9  13 407.177 86.9648   1
  -1  10 -17 496.848 134.404  -2
   7 -10 -17 496.848 134.404   1
   7 -10 -16 349.402 96.5547   1
  -2  10 -15 194.001 78.3291  -2
   7 -10 -15 194.001 78.3291   1
  -2  10 -14 386.888 75.5487  -2
   7 -10 -14 386.888 75.5487   1
   7 -10 -13 445.158 59.6145   1
  -3  10 -12 473.834 74.5181  -2
   7 -10 -12 473.834 74.5181   1
  -3  10 -11 346.868 69.8503  -2
   7 -10 -11 346.868 69.8503   1
   7 -10 -10 8.28217 47.4027   1
  -4  10  -9 258.775 66.3038  -2
   7 -10  -9 258.775 66.3038   1
   7 -10  -8 210.577 48.9124   1
   7 -10  -7 221.151 45.3513   1
  -5  10  -6 431.236 63.9274  -2
   7 -10  -6 431.236 63.9274   1
   7 -10  -5 208.977 44.1130   1
  -7 -10   4 553.365 26.8854   1
   6  10   3 493.848 33.0355  -2
  -7 -10   3 493.848 33.0355   1
  -7 -10   2 322.138 22.1820   1
   7 -10  -1 101.025 19.2267   1
  -7  10   0 20.4115 25.6625  -2
   7 -10   0 20.4115 25.6625   1
   7 -10   1 30.9057 19.5451   1
   7 -10   2 91.1582 22.3284   1
  -8  10   3 900.290 44.8604  -2
   7 -10   3 900.290 44.8604   1
   7 -10   4 411.568 32.2805   1
   7 -10   5 712.347 79.1009   1
  -9  10   6 991.659 112.157  -2
   7 -10   6 991.659 112.157   1
   7 -10   7 831.489 85.4015   1
 -10  10   8 315.617 102.545  -2
   7 -10   8 315.617 102.545   1
 -10  10   9 294.536 106.377  -2
   7 -10   9 294.536 106.377   1
   7 -10  10 111.680 80.2089   1
 -11  10  11 165.575 106.973  -2
   7 -10  11 165.575 106.973   1
 -11  10  12 334.043 112.500  -2
   7 -10  12 334.043 112.500   1
   7 -10  13 40.7417 79.3747   1
   7 -11 -16 93.5001 94.0287   1
  -2  11 -15 218.666 79.8865  -2
   7 -11 -15 218.666 79.8865   1
  -2  11 -14 708.367 83.3416  -2
   7 -11 -14 708.367 83.3416   1
   7 -11 -13 1513.84 74.7396   1
  -3  11 -12 567.245 78.1817  -2
   7 -11 -12 567.245 78.1817   1
  -3  11 -11-32.1782 68.3711  -2
   7 -11 -11-32.1782 68.3711   1
   7 -11 -10 892.454 62.0065   1
  -4  11  -9 284.549 69.9827  -2
   7 -11  -9 284.549 69.9827   1
   7 -11  -8 509.375 53.6946   1
   7 -11  -7 88.9434 46.8730   1
  -5  11  -6 517.617 68.7324  -2
   7 -11  -6 517.617 68.7324   1
  -7 -11   5 60.7227 24.4333   1
   7 -11  -4 33.9615 21.4951   1
  -6  11  -3 328.340 32.2905  -2
   7 -11  -3 328.340 32.2905   1
  -7 -11   2 517.502 27.6694   1
   7 -11  -1 66.2921 42.7343   1
  -7  11   0 1533.37 117.826  -2
   7 -11   0 1533.37 117.826   1
   7 -11   1 58.8012 60.5576   1
   7 -11   2 772.609 74.6866   1
  -8  11   3 82.6002 75.8222  -2
   7 -11   3 82.6002 75.8222   1
   7 -11   4 294.478 73.5291   1
  -9  11   5 84.8833 93.1165  -2
   7 -11   5 84.8833 93.1165   1
  -9  11   6 15.9706 93.9765  -2
   7 -11   6 15.9706 93.9765   1
   7 -11   7 60.1900 72.1011   1
 -10  11   8 819.369 114.314  -2
   7 -11   8 819.369 114.314   1
 -10  11   9 153.795 106.941  -2
   7 -11   9 153.795 106.941   1
   7 -11  10 487.762 87.0640   1
 -11  11  11 199.566 110.451  -2
   7 -11  11 199.566 110.451   1
 -11  11  12 518.250 120.495  -2
   7 -11  12 518.250 120.495   1
  -2  12 -14 266.340 80.8194  -2
   7 -12 -14 266.340 80.8194   1
   7 -12 -13 356.787 60.6264   1
  -3  12 -12 312.142 76.9000  -2
   7 -12 -12 312.142 76.9000   1
  -3  12 -11 305.454 77.0498  -2
   7 -12 -11 305.454 77.0498   1
   7 -12 -10 11.2156 51.8357   1
  -4  12  -9 245.713 74.4609  -2
   7 -12  -9 245.713 74.4609   1
   7 -12  -8-1.37729 48.9382   1
   7 -12  -7 664.794 56.8782   1
  -5  12  -6 506.369 72.7922  -2
   7 -12  -6 506.369 72.7922   1
   7 -12  -5 723.165 55.9665   1
   7 -12  -4-23.8569 45.0091   1
  -6  12  -3 1344.48 86.2687  -2
   7 -12  -3 1344.48 86.2687   1
   7 -12  -2 38.9169 46.2842   1
   7 -12  -1 227.550 48.9734   1
  -7  12   0 4.72682 60.2974  -2
   7 -12   0 4.72682 60.2974   1
   7 -12   1 1.63062 59.5618   1
   7 -12   2 77.1679 65.2501   1
  -8  12   3 206.063 99.2972  -2
   7 -12   3 206.063 99.2972   1
   7 -12   4 147.185 67.5826   1
   7 -12   5 409.536 80.7150   1
  -9  12   6 323.007 105.594  -2
   7 -12   6 323.007 105.594   1
   7 -12   7 153.432 76.9349   1
 -10  12   8 274.921 109.426  -2
   7 -12   8 274.921 109.426   1
 -10  12   9 106.400 109.387  -2
   7 -12   9 106.400 109.387   1
   7 -12  10 164.797 80.9227   1
   7 -13 -13 255.128 96.9763   1
  -3  13 -12 43.8260 76.7868  -2
   7 -13 -12 43.8260 76.7868   1
  -3  13 -11 736.699 82.9614  -2
   7 -13 -11 736.699 82.9614   1
   7 -13 -10 111.623 53.8577   1
  -4  13  -9 734.810 81.7914  -2
   7 -13  -9 734.810 81.7914   1
   7 -13  -8 20.7240 51.4311   1
   7 -13  -7 355.105 54.1997   1
  -5  13  -6 186.510 69.5603  -2
   7 -13  -6 186.510 69.5603   1
   7 -13  -5-9.87596 47.7081   1
   7 -13  -4-2.34852 48.7949   1
  -6  13  -3 166.478 69.2472  -2
   7 -13  -3 166.478 69.2472   1
   7 -13  -2 64.3458 49.4271   1
   7 -13  -1 269.990 53.3130   1
  -7  13   0 160.002 72.4336  -2
   7 -13   0 160.002 72.4336   1
   7 -13   1 632.404 78.6126   1
   7 -13   2 183.562 71.5840   1
  -8  13   3 654.632 117.128  -2
   7 -13   3 654.632 117.128   1
   7 -13   4 78.0584 73.9716   1
   7 -13   5 68.9858 75.3294   1
  -9  13   6 41.4812 90.4677  -2
   7 -13   6 41.4812 90.4677   1
   7 -13   7-67.4001 72.3451   1
 -10  13   8 255.476 111.003  -2
   7 -13   8 255.476 111.003   1
 -10  13   9 677.129 121.036  -2
   7 -13   9 677.129 121.036   1
   7 -14 -10 3.01636 91.0978   1
  -4  14  -9 32.0970 75.3511  -2
   7 -14  -9 32.0970 75.3511   1
   7 -14  -8 265.816 57.3928   1
   7 -14  -7 70.0807 52.1841   1
  -5  14  -6 1202.12 88.4700  -2
   7 -14  -6 1202.12 88.4700   1
   7 -14  -5 8.81936 52.6421   1
   7 -14  -4 746.568 61.8141   1
  -6  14  -3 108.995 71.1274  -2
   7 -14  -3 108.995 71.1274   1
   7 -14  -2 439.008 56.3496   1
   7 -14  -1-0.53196 51.1637   1
  -7  14   0 209.357 74.4270  -2
   7 -14   0 209.357 74.4270   1
   7 -14   1-34.3579 51.7238   1
   7 -14   2 2.90202 66.1532   1
  -8  14   3 69.6063 101.979  -2
   7 -14   3 69.6063 101.979   1
   7 -14   4 293.616 83.5615   1
   7 -14   5 68.6097 77.7270   1
  -9  14   6 890.730 127.473  -2
   7 -14   6 890.730 127.473   1
   7 -14   7-5.54732 80.9446   1
  -5  15  -6 388.391 82.2058  -2
   7 -15  -6 388.391 82.2058   1
   7 -15  -5 57.8504 54.9112   1
   7 -15  -4 138.557 54.6026   1
  -6  15  -3 283.973 80.9734  -2
   7 -15  -3 283.973 80.9734   1
   7 -15  -2 267.452 59.1302   1
   7 -15  -1 200.783 57.8864   1
  -7  15   0 771.556 89.5125  -2
   7 -15   0 771.556 89.5125   1
   7 -15   1 408.974 60.4828   1
   7 -15   2 305.331 61.8690   1
  -8  15   3 65.5677 105.148  -2
   7 -15   3 65.5677 105.148   1
   7 -15   4 194.804 81.7173   1
   7 -15   5-41.9653 70.5419   1
   7 -16  -2-80.4524 74.8467   1
   7 -16  -1 230.602 82.0136   1
  -7  16   0-10.9045 103.918  -2
   7 -16   0-10.9045 103.918   1
   7 -16   1 29.6600 75.7176   1
   7 -16   2 43.2334 73.9841   1
  -8  16   3 341.362 113.578  -2
   7 -16   3 341.362 113.578   1
   8   0 -22 442.544 100.574   1
  -1   0 -20 94.7308 115.348  -2
   8   0 -20 94.7308 115.348   1
  -2   0 -18 333.722 111.777  -2
   8   0 -18 333.722 111.777   1
   8   0 -16 644.531 80.1958   1
  -3   0 -14 1226.32 102.556  -2
   8   0 -14 1226.32 102.556   1
  -4   0 -12 2158.15 100.521  -2
   8   0 -12 2158.15 100.521   1
  -8   0  10 1807.02 40.9571   1
  -8   0   8 568.546 40.9320   1
  -5   0  -8 1051.99 50.3793  -2
   8   0  -8 1051.99 50.3793   1
  -6   0  -6 674.018 46.3864  -2
   8   0  -6 674.018 46.3864   1
   8   0  -4 377.335 23.1352   1
   8   0  -2 2120.66 33.5234   1
  -8   0   0 2751.14 69.4427  -2
   8   0   0 2751.14 69.4427   1
  -8   0  -2 1191.73 30.0980   1
   8   0   4 578.317 33.3332   1
 -10   0   6 946.090 55.0883  -2
   8   0   6 946.090 55.0883   1
   8   0   8 1031.30 65.6715   1
   8   0  10 1078.42 71.2750   1
 -12   0  12 84.1458 78.5915  -2
   8   0  12 84.1458 78.5915   1
 -13   0  14 1325.07 105.495  -2
   8   0  14 1325.07 105.495   1
   8   0  16 2.70948 66.5065   1
 -14   0  18 419.665 109.247  -2
   8   0  18 419.665 109.247   1
   8  -1 -22 89.1732 65.8640   1
  -1   1 -21 410.435 89.2858  -2
   8  -1 -21 410.435 89.2858   1
  -1  -1 -20 479.682 88.1707  -2
   8   1 -20 479.682 88.1707   1
   8   1 -19 335.757 62.7825   1
  -2   1 -18 448.772 78.4370  -2
   8  -1 -18 448.772 78.4370   1
  -2  -1 -17 725.626 79.3235  -2
   8   1 -17 725.626 79.3235   1
   8   1 -16 391.427 53.4527   1
  -3  -1 -15 642.828 68.1997  -2
   8   1 -15 642.828 68.1997   1
  -3  -1 -14 322.332 62.4076  -2
   8   1 -14 322.332 62.4076   1
   8  -1 -13-4.20214 39.2966   1
  -4   1 -12 708.766 49.5100  -2
   8  -1 -12 708.766 49.5100   1
  -4   1 -11 577.977 44.6367  -2
   8  -1 -11 577.977 44.6367   1
  -8  -1  10 70.9318 21.1380   1
   5   1   9 759.509 27.5508  -2
  -8  -1   9 759.509 27.5508   1
  -8  -1   8 515.587 22.8540   1
  -5  -1  -8 745.702 44.6788  -2
   8   1  -8 745.702 44.6788   1
   8   1  -7 839.579 20.0109   1
  -6   1  -6 1971.19 31.6348  -2
   8  -1  -6 1971.19 31.6348   1
   8  -1  -5 432.079 19.3667   1
  -8   1   4 16.1515 14.0840   1
  -7  -1  -3 742.407 24.0381  -2
   8   1  -3 742.407 24.0381   1
   8   1  -2 50.5321 12.7444   1
   8   1  -1 52.9439 13.8976   1
  -8  -1   0 281.605 23.0986  -2
   8   1   0 281.605 23.0986   1
   8  -1   1 745.870 20.3681   1
  -8   1  -2 1328.17 21.9723   1
  -9  -1   3 2019.48 42.4514  -2
   8   1   3 2019.48 42.4514   1
   8   1   4 1366.12 28.6811   1
   8   1   5 1210.06 29.4627   1
 -10   1   6 1231.58 41.3209  -2
   8  -1   6 1231.58 41.3209   1
   8   1   7 1099.07 35.9466   1
   8  -1   8 361.860 37.6060   1
 -11  -1   9 403.289 53.7055  -2
   8   1   9 403.289 53.7055   1
   8   1  10 52.6828 36.5666   1
 -12  -1  11 268.955 53.3450  -2
   8   1  11 268.955 53.3450   1
 -12  -1  12 95.5691 53.7132  -2
   8   1  12 95.5691 53.7132   1
   8   1  13 88.5151 42.0583   1
 -13  -1  14 137.483 58.3246  -2
   8   1  14 137.483 58.3246   1
 -13  -1  15 306.106 63.9933  -2
   8   1  15 306.106 63.9933   1
   8   1  16 193.323 49.6492   1
 -14  -1  17 538.146 74.7297  -2
   8   1  17 538.146 74.7297   1
 -14  -1  18 298.273 74.0342  -2
   8   1  18 298.273 74.0342   1
   8   2 -22 92.3730 66.0588   1
  -1  -2 -21 121.234 87.6701  -2
   8   2 -21 121.234 87.6701   1
  -1  -2 -20 129.538 84.0723  -2
   8   2 -20 129.538 84.0723   1
   8   2 -19-6.45254 56.0086   1
  -2  -2 -18 74.0197 75.7455  -2
   8   2 -18 74.0197 75.7455   1
  -2  -2 -17 513.735 75.6646  -2
   8   2 -17 513.735 75.6646   1
   8  -2 -16 24.7537 47.0676   1
  -3  -2 -15 1155.06 72.7647  -2
   8   2 -15 1155.06 72.7647   1
  -3  -2 -14 317.503 60.9489  -2
   8   2 -14 317.503 60.9489   1
   8   2 -13 2091.40 53.5878   1
  -4   2 -12 37.6186 43.8156  -2
   8  -2 -12 37.6186 43.8156   1
  -8  -2  11 2545.60 73.9823   1
  -4   2 -11 2561.98 57.0606  -2
   8  -2 -11 2561.98 57.0606   1
  -8  -2  10 100.502 23.8424   1
   5   2   9 1919.74 38.4908  -2
  -8  -2   9 1919.74 38.4908   1
  -8  -2   8 0.38691 19.5759   1
  -5   2  -8 148.282 39.7993  -2
   8  -2  -8 148.282 39.7993   1
   8  -2  -7 249.072 17.7184   1
  -6   2  -6 205.555 20.5106  -2
   8  -2  -6 205.555 20.5106   1
   8  -2  -5 20.6230 15.5521   1
   8  -2  -4 88.9550 14.2750   1
  -7   2  -3 368.429 20.3113  -2
   8  -2  -3 368.429 20.3113   1
  -8  -2   2 155.944 12.0445   1
   8   2  -1 876.200 13.7779   1
   8   2   0 79.9126 12.6006  -2
  -8  -2   0 79.9126 12.6006   1
   8   2   1 1165.14 21.9971   1
   8   2   2 176.257 16.6539   1
  -9   2   3 617.113 30.1092  -2
   8  -2   3 617.113 30.1092   1
   8   2   4 50.0332 18.4825   1
   8   2   5 23.3083 22.2508   1
 -10   2   6 50.6204 31.0609  -2
   8  -2   6 50.6204 31.0609   1
   8  -2   7 65.7302 24.2139   1
   8  -2   8 260.966 27.6612   1
 -11  -2   9 2208.59 70.0246  -2
   8   2   9 2208.59 70.0246   1
   8   2  10 466.088 40.6314   1
 -12  -2  11 790.929 57.9097  -2
   8   2  11 790.929 57.9097   1
 -12   2  12 327.631 56.9243  -2
   8  -2  12 327.631 56.9243   1
   8   2  13 113.503 39.8496   1
 -13   2  14 73.5088 56.4547  -2
   8  -2  14 73.5088 56.4547   1
 -13  -2  15 825.699 67.1986  -2
   8   2  15 825.699 67.1986   1
   8  -2  16 51.0521 46.0140   1
 -14  -2  17 98.4082 66.1676  -2
   8   2  17 98.4082 66.1676   1
 -14   2  18-5.36064 104.093  -2
   8  -2  18-5.36064 104.093   1
   8   3 -22 45.8221 67.3290   1
  -1  -3 -21 176.731 87.8047  -2
   8   3 -21 176.731 87.8047   1
  -1  -3 -20 569.725 92.1440  -2
   8   3 -20 569.725 92.1440   1
   8   3 -19 123.561 58.9095   1
  -2  -3 -18 757.801 81.2448  -2
   8   3 -18 757.801 81.2448   1
  -2   3 -17 521.422 82.0374  -2
   8  -3 -17 521.422 82.0374   1
   8   3 -16 687.328 56.5699   1
  -3  -3 -15 365.551 66.3285  -2
   8   3 -15 365.551 66.3285   1
  -3  -3 -14 231.913 61.4847  -2
   8   3 -14 231.913 61.4847   1
   8  -3 -13 269.835 36.8950   1
  -4  -3 -12 803.850 49.0595  -2
   8   3 -12 803.850 49.0595   1
  -8  -3  11 8.37680 39.2543   1
  -4  -3 -11 381.274 43.3115  -2
   8   3 -11 381.274 43.3115   1
  -8  -3  10 86.3035 23.0098   1
   5   3   9 135.346 29.4876  -2
  -8  -3   9 135.346 29.4876   1
   8   3  -8 760.692 24.2334   1
  -5   3  -8 898.458 83.7892  -2
   8  -3  -8 898.458 83.7892   1
   8  -3  -7-3.44411 15.7499   1
  -6   3  -6 1726.82 27.9165  -2
   8  -3  -6 1726.82 27.9165   1
   8  -3  -5 153.119 11.8076   1
   8  -3  -4 945.151 17.2135   1
  -7   3  -3 514.649 30.9490  -2
   8  -3  -3 514.649 30.9490   1
   8  -3  -2 167.708 19.8726   1
  -8  -3   1 370.063 22.9712   1
  -8  -3   0 30.8049 25.6886  -2
   8   3   0 30.8049 25.6886   1
   8   3   1 463.984 23.7877   1
   8  -3   2 299.649 14.5149   1
  -9   3   3 1428.02 36.5150  -2
   8  -3   3 1428.02 36.5150   1
   8  -3   4 467.164 22.3581   1
   8  -3   5 1207.18 30.3326   1
 -10   3   6 821.613 38.8273  -2
   8  -3   6 821.613 38.8273   1
   8   3   7 626.683 28.9559   1
   8  -3   8 468.390 29.2139   1
 -11   3   9 323.823 48.0240  -2
   8  -3   9 323.823 48.0240   1
   8   3  10-1.95624 32.3435   1
 -12  -3  11 312.569 50.7356  -2
   8   3  11 312.569 50.7356   1
 -12   3  12 1102.01 62.5612  -2
   8  -3  12 1102.01 62.5612   1
   8  -3  13 106.912 39.3880   1
 -13   3  14 303.730 56.6998  -2
   8  -3  14 303.730 56.6998   1
 -13   3  15 56.8796 56.1976  -2
   8  -3  15 56.8796 56.1976   1
   8  -3  16 418.366 82.7243   1
 -14   3  17 90.5335 103.878  -2
   8  -3  17 90.5335 103.878   1
   8   4 -22 139.083 91.3063   1
  -1  -4 -21 208.735 89.1005  -2
   8   4 -21 208.735 89.1005   1
  -1  -4 -20 250.501 86.9103  -2
   8   4 -20 250.501 86.9103   1
   8  -4 -19 7.01972 56.8299   1
  -2  -4 -18 481.574 79.2982  -2
   8   4 -18 481.574 79.2982   1
  -2  -4 -17 101.107 71.1088  -2
   8   4 -17 101.107 71.1088   1
   8   4 -16 380.756 52.5142   1
  -3  -4 -15 319.558 64.3402  -2
   8   4 -15 319.558 64.3402   1
  -3   4 -14 1095.16 57.6869  -2
   8  -4 -14 1095.16 57.6869   1
   8  -4 -13 22.4653 33.6839   1
  -4  -4 -12 1370.14 54.1003  -2
   8   4 -12 1370.14 54.1003   1
  -8  -4  11 4.71760 38.6354   1
  -4  -4 -11 60.2388 40.1002  -2
   8   4 -11 60.2388 40.1002   1
   8  -4 -10 420.267 25.8213   1
  -5   4  -9 198.549 29.2630  -2
   8  -4  -9 198.549 29.2630   1
   8  -4  -8 194.438 20.1381   1
   8  -4  -7 29.6852 16.4895   1
  -6  -4  -6 377.442 18.9752  -2
   8   4  -6 377.442 18.9752   1
   8  -4  -5 95.7919 8.97532   1
  -8  -4   4 796.657 25.2079   1
  -7   4  -3 417.881 29.5927  -2
   8  -4  -3 417.881 29.5927   1
   8  -4  -2 2447.18 33.5201   1
   8   4  -1 277.616 21.4834   1
   8   4   0 1910.59 44.8578  -2
  -8  -4   0 1910.59 44.8578   1
   8   4   1 129.158 19.3074   1
   8  -4   2 645.548 31.8047   1
  -9  -4   3 48.6160 18.0007  -2
   8   4   3 48.6160 18.0007   1
   8   4   4 94.7526 17.0546   1
   8   4   5 42.8147 18.7410   1
 -10  -4   6 1257.29 40.2704  -2
   8   4   6 1257.29 40.2704   1
   8  -4   7 199.289 23.5616   1
   8  -4   8 399.377 38.1872   1
 -11  -4   8 1046.89 43.9770  -2
   8   4   8 1046.89 43.9770   1
  11   4  -9 252.004 36.7431  -2
  -8  -4  -9 252.004 36.7431   1
  -8  -4 -10 525.854 31.5653   1
  -8  -4 -11 370.766 56.8618   1
 -12   4  11 398.864 49.8786  -2
   8  -4  11 398.864 49.8786   1
 -12   4  12 592.623 46.4971  -2
   8  -4  12 592.623 46.4971   1
   8  -4  13 203.272 33.2236   1
   8   4  14 76.7728 49.8823   1
 -13   4  14 677.790 74.2275  -2
   8  -4  14 677.790 74.2275   1
 -13   4  15 100.561 69.8870  -2
   8  -4  15 100.561 69.8870   1
   8  -4  16 25.0153 53.0985   1
   8   5 -22 28.4440 87.4347   1
   8   5 -21 312.441 92.5821   1
  -1   5 -21 547.622 137.290  -2
   8  -5 -21 547.622 137.290   1
  -1  -5 -20 209.283 88.0141  -2
   8   5 -20 209.283 88.0141   1
   8  -5 -19 663.642 66.9375   1
  -2  -5 -18 92.5760 76.8304  -2
   8   5 -18 92.5760 76.8304   1
  -2  -5 -17 859.219 81.3991  -2
   8   5 -17 859.219 81.3991   1
   8  -5 -16 83.6261 49.1603   1
  -3  -5 -15 687.751 69.0742  -2
   8   5 -15 687.751 69.0742   1
  -3  -5 -14 127.549 49.8809  -2
   8   5 -14 127.549 49.8809   1
   8  -5 -13 248.192 35.8427   1
  -4  -5 -12 205.847 44.3726  -2
   8   5 -12 205.847 44.3726   1
  -8  -5  11 223.873 43.1203   1
  -4  -5 -11 1012.31 48.3489  -2
   8   5 -11 1012.31 48.3489   1
   8   5 -10 79.8376 22.4629   1
  -5   5  -9 757.796 33.8593  -2
   8  -5  -9 757.796 33.8593   1
   8  -5  -8 2.55047 18.5085   1
   8  -5  -7 608.042 26.4434   1
   6   5   6 338.315 22.2489  -2
  -8  -5   6 338.315 22.2489   1
  -8  -5   5 1195.38 33.8855   1
   8  -5  -4-8.68785 18.6700   1
  -7  -5  -3 2306.60 45.1031  -2
   8   5  -3 2306.60 45.1031   1
   8  -5  -2 155.095 18.1892   1
   8  -5  -1 8.85466 18.0164   1
   8   5   0 131.087 24.8960  -2
  -8  -5   0 131.087 24.8960   1
   8  -5   1 85.1672 17.5480   1
   8  -5   2 573.933 29.7065   1
  -9  -5   3 1743.07 25.8971  -2
   8   5   3 1743.07 25.8971   1
   8   5   4 553.432 18.3346   1
   8   5   5 553.443 21.5621   1
 -10   5   6 208.068 27.7932  -2
   8  -5   6 208.068 27.7932   1
   8   5   7 269.452 19.9169   1
   8   5   8 29.2321 26.6382   1
 -11  -5   8 69.8349 37.1677  -2
   8   5   8 69.8349 37.1677   1
  11   5  -9 360.750 36.3219  -2
  -8  -5  -9 360.750 36.3219   1
   8   5  10 79.9826 25.4535   1
  -8  -5 -11 7.10222 50.6092   1
 -12  -5  11 833.320 50.9496  -2
   8   5  11 833.320 50.9496   1
 -12   5  12 22.0063 58.2642  -2
   8  -5  12 22.0063 58.2642   1
  -8  -5 -13 475.220 51.8061   1
 -13   5  14 64.4448 66.8785  -2
   8  -5  14 64.4448 66.8785   1
 -13   5  15 616.454 76.1168  -2
   8  -5  15 616.454 76.1168   1
   8  -5  16 49.2816 79.0067   1
   8   6 -22 352.415 100.451   1
   8   6 -21 160.335 92.6360   1
  -1  -6 -20 305.348 88.8592  -2
   8   6 -20 305.348 88.8592   1
   8   6 -19 36.2330 58.1300   1
  -2   6 -18 159.023 76.8259  -2
   8  -6 -18 159.023 76.8259   1
  -2  -6 -17 327.974 77.2829  -2
   8   6 -17 327.974 77.2829   1
   8   6 -16 26.5553 49.6761   1
  -3  -6 -15 587.740 57.5594  -2
   8   6 -15 587.740 57.5594   1
  -3  -6 -14 664.525 54.8588  -2
   8   6 -14 664.525 54.8588   1
   8   6 -13 606.660 41.2748   1
  -4  -6 -12 129.321 45.3954  -2
   8   6 -12 129.321 45.3954   1
  -8  -6  11 424.084 46.5421   1
  -4   6 -11 528.936 46.1050  -2
   8  -6 -11 528.936 46.1050   1
   8  -6 -10 104.248 28.6162   1
  -5   6  -9 1046.55 44.2838  -2
   8  -6  -9 1046.55 44.2838   1
   8  -6  -8 44.2141 23.6743   1
   8  -6  -7 6.99681 20.2818   1
   6   6   6 291.681 21.2813  -2
  -8  -6   6 291.681 21.2813   1
  -8  -6   5 590.568 30.2009   1
   8  -6  -4 374.553 27.1033   1
  -7   6  -3 1447.78 47.2312  -2
   8  -6  -3 1447.78 47.2312   1
   8  -6  -2 289.453 24.3729   1
  -8  -6   1 1056.03 25.9122   1
   8   6   0 88.0758 22.7089  -2
  -8  -6   0 88.0758 22.7089   1
   8  -6   1 816.156 20.8049   1
   8  -6   2 331.434 23.3957   1
  -9   6   3 420.721 31.6480  -2
   8  -6   3 420.721 31.6480   1
   8   6   4 12.8451 17.9202   1
   8   6   5 11.7622 12.1746   1
 -10   6   6 387.736 22.8743  -2
   8  -6   6 387.736 22.8743   1
   8   6   7 289.495 17.6967   1
  -8  -6  -8 281.849 35.8074   1
 -11  -6   8 228.107 36.4613  -2
   8   6   8 228.107 36.4613   1
  11   6  -9 791.791 38.1614  -2
  -8  -6  -9 791.791 38.1614   1
  -8  -6 -10 322.519 42.4822   1
  -8  -6 -11 544.846 60.0919   1
 -12   6  11 645.575 104.312  -2
   8  -6  11 645.575 104.312   1
  12   6 -12 453.737 65.3882  -2
  -8  -6 -12 453.737 65.3882   1
  -8  -6 -13 430.154 52.2328   1
 -13   6  14 175.286 109.934  -2
   8  -6  14 175.286 109.934   1
 -13   6  15 652.748 119.245  -2
   8  -6  15 652.748 119.245   1
   8  -7 -19 87.6425 91.4138   1
  -2   7 -18 1222.15 140.859  -2
   8  -7 -18 1222.15 140.859   1
  -2   7 -17 19.9410 119.301  -2
   8  -7 -17 19.9410 119.301   1
   8  -7 -16 597.470 95.7187   1
  -3   7 -15-12.1754 71.8905  -2
   8  -7 -15-12.1754 71.8905   1
  -3   7 -14 336.748 71.3215  -2
   8  -7 -14 336.748 71.3215   1
   8  -7 -13 316.694 53.4793   1
  -4   7 -12 234.947 66.8711  -2
   8  -7 -12 234.947 66.8711   1
  -4   7 -11 25.7411 62.6458  -2
   8  -7 -11 25.7411 62.6458   1
   8  -7 -10 491.989 34.2720   1
  -5   7  -9 25.5033 37.4338  -2
   8  -7  -9 25.5033 37.4338   1
   8  -7  -8 1248.59 35.4620   1
   8  -7  -7 109.489 22.2222   1
  -6   7  -6 1698.11 31.7021  -2
   8  -7  -6 1698.11 31.7021   1
  -8  -7   5 18.3236 24.7978   1
   8  -7  -4 1768.81 38.8429   1
  -7   7  -3 12.1413 28.6479  -2
   8  -7  -3 12.1413 28.6479   1
   8  -7  -2 340.117 24.2099   1
  -8  -7   1 88.0555 20.8530   1
   8   7   0 4.80567 23.7223  -2
  -8  -7   0 4.80567 23.7223   1
   8  -7   1-1.47943 55.9660   1
   8  -7   2 353.809 62.0315   1
  -9   7   3 335.528 86.8492  -2
   8  -7   3 335.528 86.8492   1
   8  -7   4 469.802 20.4471   1
  -8  -7  -5 89.3976 22.0542   1
  10   7  -6 1197.53 50.3319  -2
  -8  -7  -6 1197.53 50.3319   1
  -8  -7  -7 75.5406 30.5450   1
  -8  -7  -8 188.662 40.2004   1
 -11   7   8 455.592 98.3900  -2
   8  -7   8 455.592 98.3900   1
 -11   7   9 37.7770 49.0452  -2
   8  -7   9 37.7770 49.0452   1
  -8  -7 -10 46.1803 39.2467   1
 -12   7  11 78.4616 97.9237  -2
   8  -7  11 78.4616 97.9237   1
 -12   7  12 873.093 115.740  -2
   8  -7  12 873.093 115.740   1
   8  -7  13 65.5389 77.2432   1
 -13   7  14 576.648 118.490  -2
   8  -7  14 576.648 118.490   1
   8  -8 -19-14.1893 97.4736   1
  -2   8 -18 396.616 128.148  -2
   8  -8 -18 396.616 128.148   1
  -2   8 -17 266.144 125.561  -2
   8  -8 -17 266.144 125.561   1
   8  -8 -16-3.61944 84.5409   1
  -3   8 -15 261.955 79.1706  -2
   8  -8 -15 261.955 79.1706   1
  -3   8 -14 573.696 75.4848  -2
   8  -8 -14 573.696 75.4848   1
   8  -8 -13 338.535 54.2654   1
  -4   8 -12 544.177 72.8268  -2
   8  -8 -12 544.177 72.8268   1
  -4   8 -11 371.553 67.9874  -2
   8  -8 -11 371.553 67.9874   1
   8  -8 -10 336.552 51.6216   1
  -5   8  -9 999.012 73.6219  -2
   8  -8  -9 999.012 73.6219   1
   8  -8  -8 88.5607 26.6978   1
   8  -8  -7 15.1792 21.9611   1
   6   8   6 155.310 21.7589  -2
  -8  -8   6 155.310 21.7589   1
  -8  -8   5 119.022 8.90022   1
   8  -8  -4 443.424 28.2848   1
  -7   8  -3 1044.26 42.9955  -2
   8  -8  -3 1044.26 42.9955   1
  -8  -8   2 438.520 24.5865   1
  -8  -8   1 875.443 25.8246   1
  -8   8   0 632.870 92.4148  -2
   8  -8   0 632.870 92.4148   1
   8  -8   1 640.797 70.0607   1
   8  -8   2 370.516 64.3803   1
  -9   8   3 352.650 90.4308  -2
   8  -8   3 352.650 90.4308   1
  -8  -8  -4 29.4525 15.1123   1
   8  -8   5 9.02501 21.1003   1
  10   8  -6 387.426 41.3994  -2
  -8  -8  -6 387.426 41.3994   1
   8  -8   7 94.9576 66.5391   1
 -11   8   8 517.273 99.8522  -2
   8  -8   8 517.273 99.8522   1
 -11   8   9 365.654 104.331  -2
   8  -8   9 365.654 104.331   1
   8  -8  10 623.785 85.2421   1
 -12   8  11 417.201 110.294  -2
   8  -8  11 417.201 110.294   1
 -12   8  12 855.830 118.366  -2
   8  -8  12 855.830 118.366   1
   8  -8  13 429.048 86.8400   1
   8  -8  14 210.836 89.1045   1
  -2   9 -18 99.1004 129.052  -2
   8  -9 -18 99.1004 129.052   1
  -2   9 -17 700.280 136.070  -2
   8  -9 -17 700.280 136.070   1
   8  -9 -16 102.815 85.8760   1
  -3   9 -15 240.171 79.1114  -2
   8  -9 -15 240.171 79.1114   1
  -3   9 -14 42.1917 73.7784  -2
   8  -9 -14 42.1917 73.7784   1
   8  -9 -13-16.8415 51.8487   1
  -4   9 -12 25.3494 69.7562  -2
   8  -9 -12 25.3494 69.7562   1
  -4   9 -11 958.516 76.3057  -2
   8  -9 -11 958.516 76.3057   1
   8  -9 -10 5.97089 48.1974   1
  -5   9  -9 729.425 73.9339  -2
   8  -9  -9 729.425 73.9339   1
   8  -9  -8 40.9766 45.8144   1
   8  -9  -7 1541.01 62.5189   1
  -6   9  -6 22.5695 53.9934  -2
   8  -9  -6 22.5695 53.9934   1
  -8  -9   5 1523.45 24.2025   1
  -8  -9   4 1.18202 7.18712   1
  -7   9  -3 2047.62 51.9522  -2
   8  -9  -3 2047.62 51.9522   1
  -8  -9   2 30.0045 17.4187   1
   8  -9  -1 15.6636 56.8817   1
  -8   9   0 192.654 83.9028  -2
   8  -9   0 192.654 83.9028   1
   8  -9   1 42.4773 58.8822   1
   8  -9   2 52.0577 60.0336   1
  -9   9   3 1545.31 120.606  -2
   8  -9   3 1545.31 120.606   1
   8  -9   4 17.4280 62.0753   1
   8  -9   5 391.365 72.1713   1
 -10   9   6 235.254 94.1303  -2
   8  -9   6 235.254 94.1303   1
   8  -9   7 262.057 74.1006   1
 -11   9   8 62.6086 100.414  -2
   8  -9   8 62.6086 100.414   1
 -11   9   9 38.2150 101.660  -2
   8  -9   9 38.2150 101.660   1
   8  -9  10 6.67430 78.1345   1
 -12   9  11 737.456 117.589  -2
   8  -9  11 737.456 117.589   1
 -12   9  12 11.6195 106.430  -2
   8  -9  12 11.6195 106.430   1
   8  -9  13 279.344 86.8629   1
  -2  10 -17 77.4790 132.280  -2
   8 -10 -17 77.4790 132.280   1
   8 -10 -16 111.735 91.6634   1
  -3  10 -15 324.967 84.0324  -2
   8 -10 -15 324.967 84.0324   1
  -3  10 -14 918.481 84.7791  -2
   8 -10 -14 918.481 84.7791   1
   8 -10 -13-2.64373 53.1896   1
  -4  10 -12 462.207 77.4867  -2
   8 -10 -12 462.207 77.4867   1
  -4  10 -11 47.5041 70.6728  -2
   8 -10 -11 47.5041 70.6728   1
   8 -10 -10 381.864 56.0962   1
  -5  10  -9 634.807 75.7329  -2
   8 -10  -9 634.807 75.7329   1
   8 -10  -8 162.983 48.8048   1
   8 -10  -7-2.66275 45.9924   1
  -6  10  -6 218.136 65.0499  -2
   8 -10  -6 218.136 65.0499   1
   8 -10  -5 154.315 46.5307   1
   8 -10  -4 324.726 48.1626   1
  -7  10  -3 927.047 76.7773  -2
   8 -10  -3 927.047 76.7773   1
   8 -10  -2 402.935 50.4837   1
   8 -10  -1 668.452 54.3406   1
  -8  10   0 676.543 98.7755  -2
   8 -10   0 676.543 98.7755   1
   8 -10   1 422.443 69.9451   1
   8 -10   2 141.799 67.3140   1
  -9  10   3 248.332 90.8249  -2
   8 -10   3 248.332 90.8249   1
   8 -10   4 42.7744 67.0301   1
   8 -10   5-14.9105 66.3795   1
 -10  10   6 480.149 107.818  -2
   8 -10   6 480.149 107.818   1
   8 -10   7 139.533 77.0327   1
 -11  10   8 528.120 112.096  -2
   8 -10   8 528.120 112.096   1
 -11  10   9 421.949 112.654  -2
   8 -10   9 421.949 112.654   1
   8 -10  10 508.107 88.7447   1
 -12  10  11 478.738 117.546  -2
   8 -10  11 478.738 117.546   1
  -3  11 -15-1.60229 83.8605  -2
   8 -11 -15-1.60229 83.8605   1
  -3  11 -14 185.083 79.6732  -2
   8 -11 -14 185.083 79.6732   1
   8 -11 -13 22.4378 55.2486   1
  -4  11 -12 350.940 79.3349  -2
   8 -11 -12 350.940 79.3349   1
  -4  11 -11 139.298 73.7979  -2
   8 -11 -11 139.298 73.7979   1
   8 -11 -10 280.861 55.6214   1
  -5  11  -9 97.3237 68.5281  -2
   8 -11  -9 97.3237 68.5281   1
   8 -11  -8 784.693 78.5140   1
  -5  11  -8 979.450 116.922  -2
   8 -11  -8 979.450 116.922   1
   8 -11  -7 65.6035 48.6149   1
  -6  11  -6 1114.38 84.1188  -2
   8 -11  -6 1114.38 84.1188   1
   8 -11  -5 13.8440 45.7266   1
   8 -11  -4 492.296 52.3261   1
  -7  11  -3 21.9926 62.1065  -2
   8 -11  -3 21.9926 62.1065   1
   8 -11  -2 116.687 46.7426   1
   8 -11  -1 39.0571 46.9002   1
  -8  11   0 24.6449 85.2842  -2
   8 -11   0 24.6449 85.2842   1
   8 -11   1 120.529 65.7754   1
   8 -11   2 172.857 69.3163   1
  -9  11   3 509.743 106.912  -2
   8 -11   3 509.743 106.912   1
   8 -11   4 401.256 77.5893   1
   8 -11   5 222.201 75.2406   1
 -10  11   6 1118.14 125.815  -2
   8 -11   6 1118.14 125.815   1
   8 -11   7 105.155 76.5072   1
 -11  11   8 606.395 115.204  -2
   8 -11   8 606.395 115.204   1
 -11  11   9 103.105 108.525  -2
   8 -11   9 103.105 108.525   1
   8 -11  10-31.4512 79.3407   1
  -3  12 -15 293.174 119.953  -2
   8 -12 -15 293.174 119.953   1
  -3  12 -14 217.411 82.1324  -2
   8 -12 -14 217.411 82.1324   1
   8 -12 -13 355.675 61.2661   1
  -4  12 -12 72.1382 79.3802  -2
   8 -12 -12 72.1382 79.3802   1
  -4  12 -11 582.776 80.8343  -2
   8 -12 -11 582.776 80.8343   1
   8 -12 -10-0.46606 54.5342   1
  -5  12  -9 611.467 81.8017  -2
   8 -12  -9 611.467 81.8017   1
   8 -12  -8-5.12167 50.4803   1
   8 -12  -7 30.7373 50.7365   1
  -6  12  -6 58.1457 64.2545  -2
   8 -12  -6 58.1457 64.2545   1
   8 -12  -5 77.9900 50.7976   1
   8 -12  -4 36.9461 48.5021   1
  -7  12  -3 184.252 69.9803  -2
   8 -12  -3 184.252 69.9803   1
   8 -12  -2 211.817 50.8713   1
   8 -12  -1 306.197 52.4653   1
  -8  12   0 298.182 72.6342  -2
   8 -12   0 298.182 72.6342   1
   8 -12   1 394.309 75.5689   1
   8 -12   2 98.4153 70.0454   1
  -9  12   3 98.8408 81.4546  -2
   8 -12   3 98.8408 81.4546   1
   8 -12   4 20.2054 75.1725   1
   8 -12   5-27.9509 77.1616   1
 -10  12   6 129.565 106.836  -2
   8 -12   6 129.565 106.836   1
   8 -12   7 205.560 79.8161   1
 -11  12   8 145.019 110.448  -2
   8 -12   8 145.019 110.448   1
 -11  12   9 702.397 124.411  -2
   8 -12   9 702.397 124.411   1
   8 -13 -13 1276.57 102.240   1
  -4  13 -12 240.302 111.096  -2
   8 -13 -12 240.302 111.096   1
  -4  13 -11 374.710 82.0920  -2
   8 -13 -11 374.710 82.0920   1
   8 -13 -10 6.13133 56.5349   1
  -5  13  -9 346.790 80.7816  -2
   8 -13  -9 346.790 80.7816   1
   8 -13  -8 51.6094 53.4835   1
   8 -13  -7 524.940 61.3896   1
  -6  13  -6 489.583 79.1194  -2
   8 -13  -6 489.583 79.1194   1
   8 -13  -5 500.617 59.8521   1
   8 -13  -4 63.5199 51.6556   1
  -7  13  -3 620.845 83.3628  -2
   8 -13  -3 620.845 83.3628   1
   8 -13  -2 0.92675 51.3865   1
   8 -13  -1-2.70620 50.0575   1
  -8  13   0 58.3872 70.4398  -2
   8 -13   0 58.3872 70.4398   1
   8 -13   1 102.344 73.2024   1
   8 -13   2 18.8969 72.2824   1
  -9  13   3 1154.06 133.712  -2
   8 -13   3 1154.06 133.712   1
   8 -13   4 290.168 80.9532   1
   8 -13   5 511.306 87.8514   1
 -10  13   6 175.898 110.713  -2
   8 -13   6 175.898 110.713   1
   8 -13   7 375.502 90.1607   1
   8 -14 -10 640.120 92.5635   1
  -5  14  -9 61.9090 107.205  -2
   8 -14  -9 61.9090 107.205   1
   8 -14  -8 172.751 58.7056   1
   8 -14  -7 18.5614 55.7329   1
  -6  14  -6 236.514 79.3257  -2
   8 -14  -6 236.514 79.3257   1
   8 -14  -5 127.689 56.7724   1
   8 -14  -4 127.094 55.8885   1
  -7  14  -3 136.026 75.7639  -2
   8 -14  -3 136.026 75.7639   1
   8 -14  -2 378.382 59.6659   1
   8 -14  -1 53.8200 53.5887   1
  -8  14   0 902.694 77.9732  -2
   8 -14   0 902.694 77.9732   1
   8 -14   1 21.5971 54.7215   1
   8 -14   2 400.788 84.6315   1
  -9  14   3 61.1798 84.2071  -2
   8 -14   3 61.1798 84.2071   1
   8 -14   4 78.7160 78.6408   1
   8 -14   5-3.67741 84.4838   1
 -10  14   6 321.108 115.851  -2
   8 -14   6 321.108 115.851   1
   8 -15  -7 107.278 82.2901   1
  -6  15  -6 632.710 122.996  -2
   8 -15  -6 632.710 122.996   1
   8 -15  -5 71.5664 78.9939   1
   8 -15  -4 68.8775 78.1646   1
  -7  15  -3 30.2152 105.516  -2
   8 -15  -3 30.2152 105.516   1
   8 -15  -2-22.2836 77.1694   1
   8 -15  -1-1.73185 76.2523   1
  -8  15   0 205.223 104.598  -2
   8 -15   0 205.223 104.598   1
   8 -15   1 123.377 79.6084   1
   8 -15   2 628.480 89.7891   1
  -9  15   3 408.719 112.442  -2
   8 -15   3 408.719 112.442   1
  -7  16  -3 290.827 117.308  -2
   8 -16  -3 290.827 117.308   1
   8 -16  -2-71.8954 81.4161   1
   8 -16  -1 377.763 87.1555   1
  -8  16   0 19.2783 81.2730  -2
   8 -16   0 19.2783 81.2730   1
   8 -16   1 387.235 84.7869   1
   9   0 -22 506.615 102.568   1
  -2   0 -20 943.600 138.472  -2
   9   0 -20 943.600 138.472   1
  -3   0 -18 502.995 114.177  -2
   9   0 -18 502.995 114.177   1
   9   0 -16 305.308 76.2500   1
  -4   0 -14 704.795 91.7716  -2
   9   0 -14 704.795 91.7716   1
  -5   0 -12 1095.11 67.1224  -2
   9   0 -12 1095.11 67.1224   1
   9   0 -10 1209.79 48.3703   1
  -9   0   8 2215.43 61.9681   1
  -6   0  -8 2218.47 60.3326  -2
   9   0  -8 2218.47 60.3326   1
  -7   0  -6 3276.00 73.1624  -2
   9   0  -6 3276.00 73.1624   1
   9   0  -4 1840.02 42.7409   1
   9   0  -2 246.139 26.3213   1
  -9   0   0 454.574 70.2154  -2
   9   0   0 454.574 70.2154   1
   9   0   2 1134.08 38.1263   1
   9   0   4 745.607 37.8112   1
 -11   0   6 233.487 48.3580  -2
   9   0   6 233.487 48.3580   1
   9   0   8 125.675 52.7243   1
   9   0  10 39.7531 52.3024   1
 -13   0  12 1037.71 96.5875  -2
   9   0  12 1037.71 96.5875   1
 -14   0  14 794.527 99.2623  -2
   9   0  14 794.527 99.2623   1
   9   0  16 708.538 82.2725   1
   9  -1 -22 257.202 67.9844   1
  -2  -1 -21 179.116 89.3496  -2
   9   1 -21 179.116 89.3496   1
  -2  -1 -20 25.0237 81.8223  -2
   9   1 -20 25.0237 81.8223   1
   9   1 -19 12.3288 57.4211   1
  -3  -1 -18 215.731 79.0531  -2
   9   1 -18 215.731 79.0531   1
  -3  -1 -17 508.485 76.9810  -2
   9   1 -17 508.485 76.9810   1
   9   1 -16 117.816 50.4047   1
  -4  -1 -15 658.226 68.8939  -2
   9   1 -15 658.226 68.8939   1
  -4  -1 -14 460.748 64.0434  -2
   9   1 -14 460.748 64.0434   1
   9  -1 -13 683.833 41.4021   1
  -5   1 -12 779.475 50.9571  -2
   9  -1 -12 779.475 50.9571   1
  -5  -1 -11 502.315 39.6614  -2
   9   1 -11 502.315 39.6614   1
   9   1 -10 223.951 22.0325   1
   6   1   9 646.800 31.1625  -2
  -9  -1   9 646.800 31.1625   1
  -9  -1   8 79.1715 17.3420   1
  -6   1  -8 1560.49 90.4269  -2
   9  -1  -8 1560.49 90.4269   1
  -9  -1   7 35.2089 16.9860   1
  -7   1  -6 306.851 30.0410  -2
   9  -1  -6 306.851 30.0410   1
   9  -1  -5 478.046 22.7780   1
   9  -1  -4 768.953 23.3542   1
  -8  -1  -3 1839.12 35.1687  -2
   9   1  -3 1839.12 35.1687   1
   9   1  -2 644.933 19.0543   1
   9  -1  -1 872.682 20.0404   1
  -9  -1   0 1058.14 27.5796  -2
   9   1   0 1058.14 27.5796   1
   9   1   1 155.215 19.0887   1
   9   1   2 33.1631 17.1648   1
 -10   1   3 129.134 28.6351  -2
   9  -1   3 129.134 28.6351   1
   9   1   4 78.9856 20.9724   1
   9   1   5 30.0363 21.4147   1
 -11  -1   6 734.781 43.2752  -2
   9   1   6 734.781 43.2752   1
   9   1   7 834.254 34.9954   1
   9   1   8 416.584 40.5946   1
 -12   1   9 1644.72 75.5088  -2
   9  -1   9 1644.72 75.5088   1
   9   1  10 542.948 45.3986   1
 -13  -1  11 1196.99 66.2590  -2
   9   1  11 1196.99 66.2590   1
 -13  -1  12 396.947 60.0521  -2
   9   1  12 396.947 60.0521   1
   9   1  13 19.2953 41.4414   1
 -14  -1  14 185.598 61.9326  -2
   9   1  14 185.598 61.9326   1
 -14  -1  15 271.858 64.6796  -2
   9   1  15 271.858 64.6796   1
   9   1  16 13.7132 47.3226   1
 -15  -1  17 80.5577 71.5279  -2
   9   1  17 80.5577 71.5279   1
   9  -2 -22-16.0050 64.5286   1
  -2  -2 -21 639.094 93.1916  -2
   9   2 -21 639.094 93.1916   1
  -2   2 -20 127.029 84.3205  -2
   9  -2 -20 127.029 84.3205   1
   9   2 -19 970.770 71.0452   1
  -3  -2 -18 52.5562 75.8649  -2
   9   2 -18 52.5562 75.8649   1
  -3  -2 -17 548.790 78.2538  -2
   9   2 -17 548.790 78.2538   1
   9  -2 -16 19.6057 48.0173   1
  -4  -2 -15 498.705 67.0109  -2
   9   2 -15 498.705 67.0109   1
  -4  -2 -14 94.7229 59.0889  -2
   9   2 -14 94.7229 59.0889   1
   9  -2 -13 184.946 36.2668   1
  -5   2 -12 189.791 45.6534  -2
   9  -2 -12 189.791 45.6534   1
  -9  -2  11 1029.60 53.5593   1
  -5   2 -11 1494.32 51.0296  -2
   9  -2 -11 1494.32 51.0296   1
  -9  -2  10 14.7361 20.4047   1
   6   2   9 1788.50 38.1295  -2
  -9  -2   9 1788.50 38.1295   1
  -9  -2   8 30.0857 20.7046   1
  -6   2  -8 45.0058 48.7671  -2
   9  -2  -8 45.0058 48.7671   1
  -9  -2   7 1314.06 25.2771   1
  -7   2  -6 127.538 27.2795  -2
   9  -2  -6 127.538 27.2795   1
   9  -2  -5 2366.10 32.6262   1
   9  -2  -4 82.1774 15.0507   1
   8   2   3 538.546 22.5249  -2
  -9  -2   3 538.546 22.5249   1
   9   2  -2 114.970 12.5582   1
   9   2  -1 8.38171 9.01195   1
  -9  -2   0 990.361 16.7547  -2
   9   2   0 990.361 16.7547   1
   9   2   1 117.325 16.0982   1
   9   2   2 406.723 20.0973   1
 -10   2   3 1426.48 38.8776  -2
   9  -2   3 1426.48 38.8776   1
   9  -2   4 69.8618 21.7690   1
   9  -2   5 423.026 27.1125   1
 -11  -2   6 327.150 36.6885  -2
   9   2   6 327.150 36.6885   1
   9   2   7 112.348 26.5984   1
   9   2   8 158.179 36.5293   1
 -12   2   9 697.466 56.1241  -2
   9  -2   9 697.466 56.1241   1
   9  -2  10 52.4682 36.9252   1
 -13   2  11 1284.19 65.4050  -2
   9  -2  11 1284.19 65.4050   1
 -13  -2  12 21.6888 54.1768  -2
   9   2  12 21.6888 54.1768   1
   9  -2  13 685.621 50.6303   1
 -14  -2  14 52.4306 57.1145  -2
   9   2  14 52.4306 57.1145   1
 -14   2  15 553.772 67.5854  -2
   9  -2  15 553.772 67.5854   1
   9  -2  16 32.7271 74.9779   1
 -15   2  17 1047.18 132.954  -2
   9  -2  17 1047.18 132.954   1
   9   3 -22 185.704 92.4195   1
  -2  -3 -21 136.204 88.8408  -2
   9   3 -21 136.204 88.8408   1
  -2  -3 -20 41.9121 83.5123  -2
   9   3 -20 41.9121 83.5123   1
   9   3 -19-3.65147 57.5163   1
  -3  -3 -18 658.895 80.4172  -2
   9   3 -18 658.895 80.4172   1
  -3  -3 -17 315.130 72.8593  -2
   9   3 -17 315.130 72.8593   1
   9  -3 -16 491.263 54.9617   1
  -4  -3 -15 308.267 63.6283  -2
   9   3 -15 308.267 63.6283   1
  -4   3 -14 1176.93 59.0515  -2
   9  -3 -14 1176.93 59.0515   1
   9  -3 -13 17.5303 34.1802   1
  -5  -3 -12 1239.11 53.8763  -2
   9   3 -12 1239.11 53.8763   1
  -9  -3  11 11.3879 37.8676   1
  -5  -3 -11 36.4814 41.1392  -2
   9   3 -11 36.4814 41.1392   1
   9   3 -10 410.487 25.4248   1
   6   3   9 822.440 34.0596  -2
  -9  -3   9 822.440 34.0596   1
  -9  -3   8 3.94219 23.7970   1
  -6  -3  -8 279.312 35.8174  -2
   9   3  -8 279.312 35.8174   1
   9  -3  -7 152.766 16.6073   1
  -7   3  -6 217.380 26.8819  -2
   9  -3  -6 217.380 26.8819   1
   9  -3  -5 395.147 17.1127   1
   9  -3  -4 436.544 12.4956   1
   8   3   3 1603.51 42.8493  -2
  -9  -3   3 1603.51 42.8493   1
  -9  -3   2 1545.19 31.1632   1
   9   3  -1 202.414 24.3819   1
  -9  -3   0 1679.96 48.7551  -2
   9   3   0 1679.96 48.7551   1
   9   3   1 124.995 22.9158   1
   9  -3   2 50.2377 12.5270   1
 -10   3   3 46.1836 22.5347  -2
   9  -3   3 46.1836 22.5347   1
   9   3   4 6.32586 19.1321   1
   9  -3   5 314.658 24.6468   1
 -11   3   6 1254.21 44.1959  -2
   9  -3   6 1254.21 44.1959   1
   9   3   7 414.224 28.4603   1
   9  -3   8 371.377 37.3260   1
 -12   3   9 401.054 52.0144  -2
   9  -3   9 401.054 52.0144   1
   9  -3  10 760.931 45.2431   1
 -13   3  11 596.125 56.3721  -2
   9  -3  11 596.125 56.3721   1
 -13  -3  12 276.017 56.0403  -2
   9   3  12 276.017 56.0403   1
   9   3  13 304.684 43.5836   1
 -14   3  14 139.415 99.2141  -2
   9  -3  14 139.415 99.2141   1
 -14   3  15 73.1437 101.741  -2
   9  -3  15 73.1437 101.741   1
   9  -3  16 148.553 79.2576   1
   9   4 -22 226.386 95.5386   1
  -2  -4 -21 146.261 89.2478  -2
   9   4 -21 146.261 89.2478   1
  -2  -4 -20 956.914 98.0552  -2
   9   4 -20 956.914 98.0552   1
   9  -4 -19 87.7330 57.7634   1
  -3  -4 -18 603.317 80.3127  -2
   9   4 -18 603.317 80.3127   1
  -3  -4 -17 141.233 71.2617  -2
   9   4 -17 141.233 71.2617   1
   9   4 -16 115.695 47.8019   1
  -4   4 -15 205.653 53.5586  -2
   9  -4 -15 205.653 53.5586   1
  -4  -4 -14 170.907 49.6584  -2
   9   4 -14 170.907 49.6584   1
   9  -4 -13 10.1464 33.3605   1
  -5  -4 -12 946.111 52.5336  -2
   9   4 -12 946.111 52.5336   1
  -9  -4  11-4.43530 38.3475   1
  -5  -4 -11 114.468 41.9744  -2
   9   4 -11 114.468 41.9744   1
  -9  -4  10 808.705 28.2539   1
  -6   4  -9 133.921 27.9230  -2
   9  -4  -9 133.921 27.9230   1
  -9  -4   8 1032.42 26.9176   1
  -6   4  -8 979.082 86.3195  -2
   9  -4  -8 979.082 86.3195   1
   9  -4  -7-2.27076 14.1960   1
  -7   4  -6 1200.68 31.1360  -2
   9  -4  -6 1200.68 31.1360   1
   9  -4  -5 28.7798 21.6239   1
   9  -4  -4 220.726 22.5179   1
   8   4   3 92.9959 28.4425  -2
  -9  -4   3 92.9959 28.4425   1
  -9  -4   2 72.1861 19.6351   1
   9  -4  -1 265.992 23.8290   1
  -9   4   0 601.922 36.4243  -2
   9  -4   0 601.922 36.4243   1
   9   4   1 948.513 29.3975   1
   9   4   2 1146.61 39.9903   1
 -10  -4   3 1042.40 26.9988  -2
   9   4   3 1042.40 26.9988   1
   9  -4   4 601.865 21.8930   1
   9  -4   5 496.452 23.4904   1
 -11   4   6 422.712 34.0655  -2
   9  -4   6 422.712 34.0655   1
   9   4   7 293.091 25.3028   1
   9  -4   8-2.11696 31.5469   1
 -12   4   9 257.784 46.4781  -2
   9  -4   9 257.784 46.4781   1
   9  -4  10 92.7377 34.4138   1
 -13   4  11 20.9896 48.5640  -2
   9  -4  11 20.9896 48.5640   1
 -13  -4  12 1344.98 67.3207  -2
   9   4  12 1344.98 67.3207   1
   9  -4  13 38.3378 74.3154   1
 -14   4  14 861.501 113.317  -2
   9  -4  14 861.501 113.317   1
 -14   4  15 225.841 107.535  -2
   9  -4  15 225.841 107.535   1
   9  -4  16 330.200 85.4436   1
   9   5 -22 77.3602 90.9027   1
  -2  -5 -21 18.5773 118.447  -2
   9   5 -21 18.5773 118.447   1
  -2  -5 -20 160.204 84.7869  -2
   9   5 -20 160.204 84.7869   1
   9   5 -19 105.713 58.4157   1
  -3  -5 -18 157.044 74.9979  -2
   9   5 -18 157.044 74.9979   1
  -3  -5 -17 772.076 79.3214  -2
   9   5 -17 772.076 79.3214   1
   9   5 -16-8.67396 47.1169   1
  -4  -5 -15 798.302 58.4117  -2
   9   5 -15 798.302 58.4117   1
  -4   5 -14 220.806 49.6818  -2
   9  -5 -14 220.806 49.6818   1
   9  -5 -13 797.181 41.9123   1
  -5  -5 -12 9.55064 43.4488  -2
   9   5 -12 9.55064 43.4488   1
  -9  -5  11 700.641 49.1209   1
  -5  -5 -11 903.625 48.6340  -2
   9   5 -11 903.625 48.6340   1
   9  -5 -10 18.6108 22.1651   1
  -6  -5  -9 836.196 33.0819  -2
   9   5  -9 836.196 33.0819   1
   9  -5  -8 7.92002 17.1150   1
   9  -5  -7 70.9958 17.3213   1
  -7   5  -6 200.099 54.7878  -2
   9  -5  -6 200.099 54.7878   1
   9  -5  -5 506.152 25.3087   1
   9  -5  -4 161.923 21.3220   1
  -8   5  -3 1694.80 42.9608  -2
   9  -5  -3 1694.80 42.9608   1
  -9  -5   2 106.005 19.6511   1
  -9  -5   1 729.817 26.8634   1
   9   5   0 158.525 28.4532  -2
  -9  -5   0 158.525 28.4532   1
   9  -5   1 270.744 21.5109   1
   9  -5   2-6.68506 25.8080   1
 -10  -5   3 18.9507 29.3177  -2
   9   5   3 18.9507 29.3177   1
   9   5   4 7.53350 25.1116   1
   9   5   5 61.3778 16.8359   1
 -11  -5   6 709.308 46.5740  -2
   9   5   6 709.308 46.5740   1
   9   5   7 551.499 34.8323   1
 -12  -5   8 79.0146 38.9494  -2
   9   5   8 79.0146 38.9494   1
 -12  -5   9 1004.62 55.2620  -2
   9   5   9 1004.62 55.2620   1
   9   5  10 310.448 35.7468   1
 -13   5  11 436.934 102.469  -2
   9  -5  11 436.934 102.469   1
 -13   5  12 262.809 101.451  -2
   9  -5  12 262.809 101.451   1
   9  -5  13 52.2241 77.7835   1
 -14   5  14 68.7687 103.401  -2
   9  -5  14 68.7687 103.401   1
 -14   5  15 662.061 121.911  -2
   9  -5  15 662.061 121.911   1
   9   6 -22 51.6843 93.9801   1
  -2  -6 -21 652.945 128.755  -2
   9   6 -21 652.945 128.755   1
  -2  -6 -20 294.525 89.0364  -2
   9   6 -20 294.525 89.0364   1
   9   6 -19 503.560 65.2503   1
  -3  -6 -18 183.718 76.5511  -2
   9   6 -18 183.718 76.5511   1
  -3  -6 -17 313.007 74.8812  -2
   9   6 -17 313.007 74.8812   1
   9   6 -16 191.616 50.7057   1
  -4  -6 -15 310.476 55.0973  -2
   9   6 -15 310.476 55.0973   1
  -4  -6 -14 352.028 52.1628  -2
   9   6 -14 352.028 52.1628   1
   9   6 -13 15.2728 33.2737   1
  -5  -6 -12 321.888 46.5393  -2
   9   6 -12 321.888 46.5393   1
  -5  -6 -11 1109.13 50.3194  -2
   9   6 -11 1109.13 50.3194   1
   9  -6 -10 189.334 29.7877   1
   6   6   9 975.488 42.6010  -2
  -9  -6   9 975.488 42.6010   1
   9  -6  -8 192.868 23.2400   1
  -9  -6   7 668.543 22.0184   1
  -7   6  -6 1376.86 52.6574  -2
   9  -6  -6 1376.86 52.6574   1
   9  -6  -5 490.799 30.3548   1
   9  -6  -4 28.8302 23.1663   1
  -8   6  -3 369.883 37.6327  -2
   9  -6  -3 369.883 37.6327   1
  -9  -6   2 101.205 19.6288   1
   9   6  -1 119.164 19.8141   1
  -9  -6   0 658.955 31.9962  -2
   9   6   0 658.955 31.9962   1
   9   6   1 563.909 30.6618   1
   9  -6   2 647.149 30.8144   1
 -10   6   3 2148.68 58.2883  -2
   9  -6   3 2148.68 58.2883   1
   9  -6   4 573.857 29.2049   1
   9   6   5 745.744 31.2537   1
 -11  -6   6 282.137 35.2380  -2
   9   6   6 282.137 35.2380   1
   9   6   7 161.941 25.6958   1
 -12   6   8 111.517 91.1831  -2
   9  -6   8 111.517 91.1831   1
 -12   6   9 251.457 101.903  -2
   9  -6   9 251.457 101.903   1
   9  -6  10-51.5139 69.6071   1
 -13   6  11 481.157 108.796  -2
   9  -6  11 481.157 108.796   1
 -13   6  12 108.914 104.004  -2
   9  -6  12 108.914 104.004   1
   9  -6  13 305.653 84.4948   1
 -14   6  14 197.973 107.419  -2
   9  -6  14 197.973 107.419   1
   9  -7 -19-57.5996 92.4942   1
  -3   7 -18 826.616 137.053  -2
   9  -7 -18 826.616 137.053   1
  -3   7 -17 40.3062 118.754  -2
   9  -7 -17 40.3062 118.754   1
   9  -7 -16 840.710 70.4420   1
  -4   7 -15-26.3625 75.8581  -2
   9  -7 -15-26.3625 75.8581   1
  -4   7 -14 1831.80 89.1229  -2
   9  -7 -14 1831.80 89.1229   1
   9  -7 -13 64.3654 49.3659   1
  -5   7 -12 1602.32 84.7317  -2
   9  -7 -12 1602.32 84.7317   1
  -5   7 -11 23.2964 65.6224  -2
   9  -7 -11 23.2964 65.6224   1
   9  -7 -10 585.271 55.0472   1
  -6   7  -9 63.0023 61.9042  -2
   9  -7  -9 63.0023 61.9042   1
   9  -7  -8 17.1589 21.4404   1
  -9  -7   7 0.17088 13.5331   1
  -7   7  -6 148.896 39.2414  -2
   9  -7  -6 148.896 39.2414   1
   9  -7  -5 23.4002 26.4115   1
   9  -7  -4 1038.13 35.0712   1
  -8   7  -3 183.771 34.6043  -2
   9  -7  -3 183.771 34.6043   1
  -9  -7   2 445.145 27.5413   1
  -9  -7   1 28.4477 24.2457   1
   9   7   0 1289.96 47.2030  -2
  -9  -7   0 1289.96 47.2030   1
   9  -7   1-9.39660 57.1605   1
   9  -7   2 427.527 68.1272   1
 -10  -7   3 20.1360 19.8999  -2
   9   7   3 20.1360 19.8999   1
   9  -7   4 170.946 14.4710   1
   9  -7   5 37.5478 63.6683   1
 -11   7   6 1581.72 122.037  -2
   9  -7   6 1581.72 122.037   1
   9  -7   7 117.125 68.4837   1
 -12   7   8 520.624 122.112  -2
   9  -7   8 520.624 122.112   1
 -12   7   9 74.3980 96.3620  -2
   9  -7   9 74.3980 96.3620   1
   9  -7  10 384.849 81.7044   1
 -13   7  11 70.9232 104.483  -2
   9  -7  11 70.9232 104.483   1
 -13   7  12 286.711 109.876  -2
   9  -7  12 286.711 109.876   1
   9  -7  13-26.6478 80.3858   1
  -3   8 -18 425.030 134.000  -2
   9  -8 -18 425.030 134.000   1
  -3   8 -17 236.036 124.076  -2
   9  -8 -17 236.036 124.076   1
   9  -8 -16 378.169 66.0157   1
  -4   8 -15 437.414 83.6668  -2
   9  -8 -15 437.414 83.6668   1
  -4   8 -14 1073.25 83.6398  -2
   9  -8 -14 1073.25 83.6398   1
   9  -8 -13 18.9320 52.8411   1
  -5   8 -12 264.191 72.8239  -2
   9  -8 -12 264.191 72.8239   1
  -5   8 -11 619.014 73.9333  -2
   9  -8 -11 619.014 73.9333   1
   9  -8 -10 129.497 49.2508   1
  -6   8  -9 305.251 68.2661  -2
   9  -8  -9 305.251 68.2661   1
   9  -8  -8 565.183 52.8947   1
   9  -8  -7 366.433 47.5978   1
  -7   8  -6 972.436 74.6980  -2
   9  -8  -6 972.436 74.6980   1
   9  -8  -5 110.093 27.3396   1
   9  -8  -4 27.8925 25.4475   1
  -8   8  -3 308.342 36.7436  -2
   9  -8  -3 308.342 36.7436   1
  -9  -8   2 10.7922 22.2738   1
   9  -8  -1 155.962 61.8796   1
  -9   8   0 274.973 88.2806  -2
   9  -8   0 274.973 88.2806   1
   9  -8   1 326.910 65.5823   1
   9  -8   2 1202.09 85.8337   1
 -10   8   3 1057.54 113.465  -2
   9  -8   3 1057.54 113.465   1
   9  -8   4 946.772 82.7499   1
   9  -8   5 319.782 70.2946   1
 -11   8   6 614.639 107.525  -2
   9  -8   6 614.639 107.525   1
   9  -8   7 74.6085 70.5099   1
 -12   8   8 383.450 105.196  -2
   9  -8   8 383.450 105.196   1
 -12   8   9 200.385 105.935  -2
   9  -8   9 200.385 105.935   1
   9  -8  10-14.9409 77.1299   1
 -13   8  11 136.769 109.533  -2
   9  -8  11 136.769 109.533   1
 -13   8  12 194.927 109.514  -2
   9  -8  12 194.927 109.514   1
  -3   9 -17 907.203 146.504  -2
   9  -9 -17 907.203 146.504   1
   9  -9 -16-17.8089 61.4915   1
  -4   9 -15 1283.38 93.8676  -2
   9  -9 -15 1283.38 93.8676   1
  -4   9 -14 1253.08 89.7105  -2
   9  -9 -14 1253.08 89.7105   1
   9  -9 -13 1190.36 71.7360   1
  -5   9 -12-19.1748 74.3156  -2
   9  -9 -12-19.1748 74.3156   1
  -5   9 -11 928.374 79.5305  -2
   9  -9 -11 928.374 79.5305   1
   9  -9 -10-25.6233 50.9292   1
  -6   9  -9 712.467 76.3573  -2
   9  -9  -9 712.467 76.3573   1
   9  -9  -8-4.26121 63.6129   1
  -6   9  -8-5.06018 92.3631  -2
   9  -9  -8-5.06018 92.3631   1
   9  -9  -7 19.0905 44.7375   1
  -7   9  -6 47.6660 60.9814  -2
   9  -9  -6 47.6660 60.9814   1
   9  -9  -5 695.889 53.2648   1
   9  -9  -4 154.903 46.8767   1
  -8   9  -3 1552.17 88.0279  -2
   9  -9  -3 1552.17 88.0279   1
   9  -9  -2 146.906 46.7049   1
   9  -9  -1 850.635 55.3737   1
  -9   9   0 74.0233 62.6817  -2
   9  -9   0 74.0233 62.6817   1
   9  -9   1 394.186 70.0666   1
   9  -9   2-2.16884 64.7540   1
 -10   9   3 106.968 92.1650  -2
   9  -9   3 106.968 92.1650   1
   9  -9   4-7.49246 67.8544   1
   9  -9   5 60.4864 67.3885   1
 -11   9   6 44.2622 97.6793  -2
   9  -9   6 44.2622 97.6793   1
   9  -9   7 310.982 80.5143   1
 -12   9   8 1.65017 104.459  -2
   9  -9   8 1.65017 104.459   1
 -12   9   9 935.789 128.194  -2
   9  -9   9 935.789 128.194   1
   9  -9  10-3.99545 78.6278   1
 -13   9  11 547.041 119.946  -2
   9  -9  11 547.041 119.946   1
   9 -10 -16 120.545 65.3704   1
  -4  10 -15 303.751 85.7972  -2
   9 -10 -15 303.751 85.7972   1
  -4  10 -14 1503.07 94.4571  -2
   9 -10 -14 1503.07 94.4571   1
   9 -10 -13 5.93700 57.3964   1
  -5  10 -12 343.367 81.7526  -2
   9 -10 -12 343.367 81.7526   1
  -5  10 -11 693.866 80.4709  -2
   9 -10 -11 693.866 80.4709   1
   9 -10 -10 201.617 55.3963   1
  -6  10  -9 26.4670 70.4056  -2
   9 -10  -9 26.4670 70.4056   1
   9 -10  -8 611.208 58.4685   1
   9 -10  -7 69.6638 48.0695   1
  -7  10  -6 1032.97 81.8799  -2
   9 -10  -6 1032.97 81.8799   1
   9 -10  -5 11.6726 46.8236   1
   9 -10  -4 80.7430 45.9552   1
  -8  10  -3 130.010 65.4967  -2
   9 -10  -3 130.010 65.4967   1
   9 -10  -2 38.7658 45.3334   1
   9 -10  -1 338.168 51.3578   1
  -9  10   0 366.121 101.406  -2
   9 -10   0 366.121 101.406   1
   9 -10   1 546.043 75.5781   1
   9 -10   2 597.674 78.5936   1
 -10  10   3 996.993 121.155  -2
   9 -10   3 996.993 121.155   1
   9 -10   4 467.573 77.8840   1
   9 -10   5 667.522 87.9311   1
 -11  10   6 145.410 107.339  -2
   9 -10   6 145.410 107.339   1
   9 -10   7 241.492 80.5819   1
 -12  10   8 480.905 113.610  -2
   9 -10   8 480.905 113.610   1
 -12  10   9 374.272 116.892  -2
   9 -10   9 374.272 116.892   1
   9 -10  10 24.2161 80.3147   1
   9 -11 -16 389.058 95.9501   1
  -4  11 -15 65.4226 114.973  -2
   9 -11 -15 65.4226 114.973   1
  -4  11 -14 2554.19 107.211  -2
   9 -11 -14 2554.19 107.211   1
   9 -11 -13-20.4069 58.9448   1
  -5  11 -12 873.990 90.1240  -2
   9 -11 -12 873.990 90.1240   1
  -5  11 -11 40.1915 77.9586  -2
   9 -11 -11 40.1915 77.9586   1
   9 -11 -10 270.441 58.8171   1
  -6  11  -9 113.799 74.4560  -2
   9 -11  -9 113.799 74.4560   1
   9 -11  -8 92.6122 71.4215   1
  -6  11  -8 265.514 112.344  -2
   9 -11  -8 265.514 112.344   1
   9 -11  -7 24.3534 51.4299   1
  -7  11  -6 77.5755 70.9700  -2
   9 -11  -6 77.5755 70.9700   1
   9 -11  -5 277.721 53.3958   1
   9 -11  -4 750.043 59.8901   1
  -8  11  -3 560.751 77.2145  -2
   9 -11  -3 560.751 77.2145   1
   9 -11  -2 555.593 56.4951   1
   9 -11  -1 11.7191 49.4703   1
  -9  11   0 532.003 66.5468  -2
   9 -11   0 532.003 66.5468   1
   9 -11   1-59.3483 67.6180   1
   9 -11   2 49.0295 70.2536   1
 -10  11   3 176.019 105.098  -2
   9 -11   3 176.019 105.098   1
   9 -11   4-9.91485 73.7730   1
   9 -11   5 39.0311 74.5830   1
 -11  11   6 879.116 124.303  -2
   9 -11   6 879.116 124.303   1
   9 -11   7 46.3648 75.7225   1
 -12  11   8 411.180 115.261  -2
   9 -11   8 411.180 115.261   1
 -12  11   9 193.753 114.301  -2
   9 -11   9 193.753 114.301   1
   9 -12 -16-35.8622 94.1269   1
  -4  12 -15 54.9203 119.680  -2
   9 -12 -15 54.9203 119.680   1
  -4  12 -14 4031.30 157.775  -2
   9 -12 -14 4031.30 157.775   1
   9 -12 -13 58.2892 62.4187   1
  -5  12 -12 241.155 85.1664  -2
   9 -12 -12 241.155 85.1664   1
  -5  12 -11 622.212 85.8149  -2
   9 -12 -11 622.212 85.8149   1
   9 -12 -10 42.8104 57.4983   1
  -6  12  -9 674.712 86.3766  -2
   9 -12  -9 674.712 86.3766   1
   9 -12  -8 23.4351 72.2711   1
  -6  12  -8 135.470 112.923  -2
   9 -12  -8 135.470 112.923   1
   9 -12  -7 741.516 65.1883   1
  -7  12  -6 213.651 76.1958  -2
   9 -12  -6 213.651 76.1958   1
   9 -12  -5 503.171 57.1987   1
   9 -12  -4-5.10253 51.1304   1
  -8  12  -3 161.907 74.3774  -2
   9 -12  -3 161.907 74.3774   1
   9 -12  -2 29.3456 50.9023   1
   9 -12  -1 21.8458 52.4399   1
  -9  12   0 489.213 81.8766  -2
   9 -12   0 489.213 81.8766   1
   9 -12   1 174.631 76.2017   1
   9 -12   2 120.645 74.9792   1
 -10  12   3 1137.63 132.014  -2
   9 -12   3 1137.63 132.014   1
   9 -12   4 143.316 80.5274   1
   9 -12   5 410.836 84.9787   1
 -11  12   6 203.238 110.797  -2
   9 -12   6 203.238 110.797   1
   9 -12   7 28.0358 82.2898   1
  -4  13 -14 1746.79 136.629  -2
   9 -13 -14 1746.79 136.629   1
   9 -13 -13 97.3571 86.2913   1
  -5  13 -12 110.234 115.533  -2
   9 -13 -12 110.234 115.533   1
  -5  13 -11 298.021 115.349  -2
   9 -13 -11 298.021 115.349   1
   9 -13 -10 31.0822 59.9427   1
  -6  13  -9 346.110 84.8793  -2
   9 -13  -9 346.110 84.8793   1
   9 -13  -8 43.2997 78.4918   1
  -6  13  -8 53.2949 125.813  -2
   9 -13  -8 53.2949 125.813   1
   9 -13  -7 65.3171 56.5272   1
  -7  13  -6 177.912 76.9946  -2
   9 -13  -6 177.912 76.9946   1
   9 -13  -5 337.965 58.5274   1
   9 -13  -4 259.244 58.4531   1
  -8  13  -3 1129.44 95.1475  -2
   9 -13  -3 1129.44 95.1475   1
   9 -13  -2 149.943 55.9573   1
   9 -13  -1 324.549 59.3364   1
  -9  13   0 11.5988 76.6482  -2
   9 -13   0 11.5988 76.6482   1
   9 -13   1 107.571 56.1582   1
   9 -13   2 6.14833 75.7777   1
 -10  13   3 77.2734 102.914  -2
   9 -13   3 77.2734 102.914   1
   9 -13   4 40.7360 79.4538   1
   9 -13   5 25.3194 83.3979   1
  -5  14 -11 30.1060 117.249  -2
   9 -14 -11 30.1060 117.249   1
   9 -14 -10 530.659 94.2895   1
  -6  14  -9 58.6771 111.692  -2
   9 -14  -9 58.6771 111.692   1
   9 -14  -8 709.155 95.8638   1
   9 -14  -7 82.8406 80.3135   1
  -7  14  -6 914.667 93.7307  -2
   9 -14  -6 914.667 93.7307   1
   9 -14  -5 29.7835 57.1927   1
   9 -14  -4 245.803 58.7877   1
  -8  14  -3 11.1229 78.1836  -2
   9 -14  -3 11.1229 78.1836   1
   9 -14  -2 27.3984 56.1997   1
   9 -14  -1 39.0425 55.1572   1
  -9  14   0 199.566 81.8888  -2
   9 -14   0 199.566 81.8888   1
   9 -14   1 238.862 82.6553   1
   9 -14   2 341.135 83.4433   1
 -10  14   3 242.377 97.6119  -2
   9 -14   3 242.377 97.6119   1
   9 -15  -8 64.0055 86.3982   1
   9 -15  -7 37.0618 85.4695   1
  -7  15  -6 203.644 119.563  -2
   9 -15  -6 203.644 119.563   1
   9 -15  -5 140.427 84.0341   1
   9 -15  -4 277.844 84.9508   1
  -8  15  -3 284.093 115.998  -2
   9 -15  -3 284.093 115.998   1
   9 -15  -2 215.989 82.9644   1
   9 -15  -1 127.710 81.9405   1
  -9  15   0 298.149 115.308  -2
   9 -15   0 298.149 115.308   1
   9 -15   1 28.9581 81.4785   1
  10   0 -22 12.6576 93.0656   1
  -3   0 -20 380.245 127.812  -2
  10   0 -20 380.245 127.812   1
  -4   0 -18 894.103 120.424  -2
  10   0 -18 894.103 120.424   1
  10   0 -16 811.158 83.9154   1
  -5   0 -14 898.313 95.2921  -2
  10   0 -14 898.313 95.2921   1
  -6   0 -12 1729.02 75.0076  -2
  10   0 -12 1729.02 75.0076   1
  10   0 -10 28.7891 37.1049   1
  -7   0  -8 1085.07 52.9381  -2
  10   0  -8 1085.07 52.9381   1
  -8   0  -6 927.857 52.2505  -2
  10   0  -6 927.857 52.2505   1
  10   0  -4 848.817 36.8260   1
  10   0  -2 1138.70 37.1331   1
 -10   0   0 1225.63 39.8832  -2
  10   0   0 1225.63 39.8832   1
  10   0   2 52.8032 28.7734   1
  10   0   4 95.9476 31.5807   1
 -12   0   6 799.363 87.7758  -2
  10   0   6 799.363 87.7758   1
  10   0   8 527.195 62.7542   1
  10   0  10 379.997 63.2104   1
 -14   0  12 508.234 93.0784  -2
  10   0  12 508.234 93.0784   1
 -15   0  14 578.926 101.037  -2
  10   0  14 578.926 101.037   1
  10   0  16 418.719 84.7687   1
  10  -1 -22 191.100 67.2686   1
  -3  -1 -21 390.433 91.5391  -2
  10   1 -21 390.433 91.5391   1
  -3  -1 -20 631.475 92.7902  -2
  10   1 -20 631.475 92.7902   1
  10   1 -19 211.730 61.4015   1
  -4  -1 -18 80.5002 76.6741  -2
  10   1 -18 80.5002 76.6741   1
  -4  -1 -17 135.503 72.9269  -2
  10   1 -17 135.503 72.9269   1
  10   1 -16 235.661 51.3924   1
  -5  -1 -15 429.096 66.1450  -2
  10   1 -15 429.096 66.1450   1
  -5  -1 -14 840.133 66.3358  -2
  10   1 -14 840.133 66.3358   1
  10  -1 -13 182.592 36.1169   1
  -6   1 -12 164.443 40.9022  -2
  10  -1 -12 164.443 40.9022   1
  -6  -1 -11 1171.65 44.4963  -2
  10   1 -11 1171.65 44.4963   1
 -10  -1  10 575.574 25.0266   1
   7   1   9 878.660 33.3468  -2
 -10  -1   9 878.660 33.3468   1
  10   1  -8 274.296 27.4703   1
  -7  -1  -8 374.642 77.4739  -2
  10   1  -8 374.642 77.4739   1
  10   1  -7 165.131 23.0488   1
  -8   1  -6 1037.16 38.2229  -2
  10  -1  -6 1037.16 38.2229   1
  10  -1  -5 156.542 20.6706   1
  10  -1  -4 22.5760 18.7443   1
  -9  -1  -3 110.796 25.6771  -2
  10   1  -3 110.796 25.6771   1
  10   1  -2 102.733 18.1334   1
  10   1  -1 843.037 19.3559   1
 -10  -1   0 1430.67 32.7212  -2
  10   1   0 1430.67 32.7212   1
  10   1   1 987.969 26.0815   1
  10   1   2 856.425 26.1711   1
 -11   1   3 1570.80 43.3579  -2
  10  -1   3 1570.80 43.3579   1
  10  -1   4 905.657 28.6784   1
  10  -1   5 359.845 30.0672   1
 -12  -1   6 436.207 42.9527  -2
  10   1   6 436.207 42.9527   1
  10   1   7 90.8685 38.3775   1
  10   1   8 4.56270 37.3488   1
 -13  -1   9 329.025 57.0502  -2
  10   1   9 329.025 57.0502   1
  10   1  10 39.8131 39.5026   1
 -14  -1  11 141.398 58.2089  -2
  10   1  11 141.398 58.2089   1
 -14   1  12 27.0671 58.6770  -2
  10  -1  12 27.0671 58.6770   1
  10  -1  13 351.414 48.7673   1
 -15   1  14 439.533 70.3448  -2
  10  -1  14 439.533 70.3448   1
 -15  -1  15 393.205 71.1858  -2
  10   1  15 393.205 71.1858   1
  10  -1  16 171.409 76.7952   1
  10   2 -22 86.1083 91.8748   1
  -3  -2 -21 344.347 91.4647  -2
  10   2 -21 344.347 91.4647   1
  -3  -2 -20-21.3757 84.3655  -2
  10   2 -20-21.3757 84.3655   1
  10  -2 -19 414.101 64.0202   1
  -4  -2 -18 24.9582 75.7651  -2
  10   2 -18 24.9582 75.7651   1
  -4   2 -17 1628.66 89.6092  -2
  10  -2 -17 1628.66 89.6092   1
  10  -2 -16-2.94197 48.1971   1
  -5  -2 -15 1523.34 77.0257  -2
  10   2 -15 1523.34 77.0257   1
  -5   2 -14 51.4936 49.0913  -2
  10  -2 -14 51.4936 49.0913   1
  10  -2 -13 717.632 42.0297   1
  -6   2 -12 512.201 48.3180  -2
  10  -2 -12 512.201 48.3180   1
 -10  -2  11 437.337 45.1630   1
  -6   2 -11 977.586 49.0294  -2
  10  -2 -11 977.586 49.0294   1
 -10  -2  10 13.1966 20.5369   1
  -7   2  -9 363.068 29.0300  -2
  10  -2  -9 363.068 29.0300   1
 -10  -2   8 10.6744 25.3229   1
  -7  -2  -8 339.158 36.9327  -2
  10   2  -8 339.158 36.9327   1
  10   2  -7 264.072 23.2883   1
  -8   2  -6 93.9704 27.2824  -2
  10  -2  -6 93.9704 27.2824   1
  10  -2  -5 1174.25 26.7497   1
  10  -2  -4 108.512 17.7195   1
  -9   2  -3 1298.85 31.6095  -2
  10  -2  -3 1298.85 31.6095   1
  10  -2  -2 208.554 11.9012   1
  10   2  -1 1015.62 16.2555   1
 -10  -2   0 18.1358 12.2209  -2
  10   2   0 18.1358 12.2209   1
  10   2   1 88.2695 12.8139   1
  10  -2   2 11.6767 17.6778   1
 -11   2   3 170.712 31.1197  -2
  10  -2   3 170.712 31.1197   1
  10  -2   4 11.5196 22.7309   1
  10  -2   5 73.3902 24.6206   1
 -12  -2   6 251.899 38.1878  -2
  10   2   6 251.899 38.1878   1
  10   2   7 581.298 43.2191   1
  10   2   8 88.8977 35.6082   1
 -13  -2   9 543.234 59.3534  -2
  10   2   9 543.234 59.3534   1
  10   2  10 225.306 41.9886   1
 -14  -2  11 806.976 63.0972  -2
  10   2  11 806.976 63.0972   1
 -14   2  12 67.4779 56.7810  -2
  10  -2  12 67.4779 56.7810   1
  10  -2  13 71.9854 42.6741   1
 -15   2  14-6.04620 101.045  -2
  10  -2  14-6.04620 101.045   1
 -15   2  15 1009.29 123.732  -2
  10  -2  15 1009.29 123.732   1
  10  -2  16 99.0538 79.3061   1
  10   3 -22 229.364 91.8608   1
  -3  -3 -21 331.089 91.7706  -2
  10   3 -21 331.089 91.7706   1
  -3  -3 -20 605.731 92.4459  -2
  10   3 -20 605.731 92.4459   1
  10   3 -19 84.9545 57.5989   1
  -4  -3 -18 254.922 77.2070  -2
  10   3 -18 254.922 77.2070   1
  -4  -3 -17 169.862 70.9026  -2
  10   3 -17 169.862 70.9026   1
  10   3 -16 36.6976 46.3437   1
  -5  -3 -15 259.203 54.4657  -2
  10   3 -15 259.203 54.4657   1
  -5   3 -14 720.527 55.4824  -2
  10  -3 -14 720.527 55.4824   1
  10   3 -13 58.7403 33.9374   1
  -6  -3 -12 1087.86 53.6077  -2
  10   3 -12 1087.86 53.6077   1
 -10  -3  11 98.9051 38.2532   1
  -6  -3 -11 732.105 46.9653  -2
  10   3 -11 732.105 46.9653   1
 -10  -3  10 1308.21 31.9920   1
   7   3   9 282.798 27.6583  -2
 -10  -3   9 282.798 27.6583   1
 -10  -3   8 862.156 23.2352   1
  10  -3  -7 52.6366 20.4114   1
  -8   3  -6 765.586 31.2830  -2
  10  -3  -6 765.586 31.2830   1
  10  -3  -5 144.053 14.6658   1
  10  -3  -4 16.2596 26.3188   1
  -9   3  -3 82.3425 37.0284  -2
  10  -3  -3 82.3425 37.0284   1
  10  -3  -2 152.567 22.5907   1
  10  -3  -1 543.799 26.2202   1
 -10  -3   0 2241.17 58.2803  -2
  10   3   0 2241.17 58.2803   1
  10   3   1 599.047 29.8414   1
  10   3   2 535.999 18.2738   1
 -11   3   3 1069.89 35.3296  -2
  10  -3   3 1069.89 35.3296   1
  10  -3   4 460.057 24.3793   1
  10   3   5 365.321 25.8793   1
 -12   3   6 132.583 46.4275  -2
  10  -3   6 132.583 46.4275   1
  10  -3   7 22.9851 33.5275   1
  10  -3   8 28.8005 60.0901   1
 -13  -3   8 614.460 66.7396  -2
  10   3   8 614.460 66.7396   1
 -13  -3   9 249.791 50.8967  -2
  10   3   9 249.791 50.8967   1
  10   3  10 292.568 41.6688   1
 -14   3  11 174.002 53.5442  -2
  10  -3  11 174.002 53.5442   1
 -14   3  12 521.058 60.1829  -2
  10  -3  12 521.058 60.1829   1
  10  -3  13 119.086 77.0675   1
 -15   3  14 682.045 116.706  -2
  10  -3  14 682.045 116.706   1
 -15   3  15 217.870 105.987  -2
  10  -3  15 217.870 105.987   1
  10   4 -22 4.92446 90.7570   1
  -3  -4 -21-23.1386 119.938  -2
  10   4 -21-23.1386 119.938   1
  -3  -4 -20 194.118 86.3015  -2
  10   4 -20 194.118 86.3015   1
  10   4 -19-21.4747 57.2418   1
  -4  -4 -18 538.376 78.8646  -2
  10   4 -18 538.376 78.8646   1
  -4  -4 -17 78.1237 69.4519  -2
  10   4 -17 78.1237 69.4519   1
  10   4 -16 648.353 56.4926   1
  -5  -4 -15 14.3273 52.5192  -2
  10   4 -15 14.3273 52.5192   1
  -5   4 -14 589.310 53.6005  -2
  10  -4 -14 589.310 53.6005   1
  10   4 -13 163.179 34.7337   1
  -6  -4 -12 703.870 50.2270  -2
  10   4 -12 703.870 50.2270   1
 -10  -4  11 32.5697 36.6593   1
  -6  -4 -11 215.858 42.7352  -2
  10   4 -11 215.858 42.7352   1
 -10  -4  10 144.024 22.0705   1
  -7   4  -9 255.688 28.7447  -2
  10  -4  -9 255.688 28.7447   1
  10  -4  -8 261.460 18.8238   1
  10  -4  -7 178.373 19.2303   1
  -8   4  -6 1235.14 26.7081  -2
  10  -4  -6 1235.14 26.7081   1
  10  -4  -5 463.960 34.6643   1
  10  -4  -4 2018.30 45.2379   1
   9   4   3 1175.22 41.8003  -2
 -10  -4   3 1175.22 41.8003   1
 -10  -4   2 831.914 28.1067   1
 -10  -4   1 111.680 21.4123   1
 -10   4   0 801.503 41.6934  -2
  10  -4   0 801.503 41.6934   1
  10   4   1 50.6928 22.9839   1
  10   4   2 27.1235 29.3211   1
 -11   4   3 342.208 46.6536  -2
  10  -4   3 342.208 46.6536   1
  10  -4   4 139.225 16.6843   1
  10  -4   5 119.780 31.4981   1
 -12   4   6 1298.80 62.2936  -2
  10  -4   6 1298.80 62.2936   1
  10  -4   7 224.237 34.4747   1
 -13   4   8 636.484 50.8901  -2
  10  -4   8 636.484 50.8901   1
 -13  -4   9 495.383 53.4165  -2
  10   4   9 495.383 53.4165   1
  10   4  10 357.496 40.8344   1
 -14   4  11 378.913 105.186  -2
  10  -4  11 378.913 105.186   1
 -14   4  12 580.337 110.901  -2
  10  -4  12 580.337 110.901   1
  10  -4  13 116.371 78.3018   1
 -15   4  14 404.097 112.503  -2
  10  -4  14 404.097 112.503   1
  10   5 -22-28.7884 91.8589   1
  -3  -5 -21 413.233 123.716  -2
  10   5 -21 413.233 123.716   1
  -3  -5 -20 73.7838 84.1324  -2
  10   5 -20 73.7838 84.1324   1
  10   5 -19 381.367 63.4861   1
  -4  -5 -18 53.8100 73.2105  -2
  10   5 -18 53.8100 73.2105   1
  -4  -5 -17 74.1543 69.5809  -2
  10   5 -17 74.1543 69.5809   1
  10   5 -16 14.9421 40.4590   1
  -5  -5 -15 506.065 56.9730  -2
  10   5 -15 506.065 56.9730   1
  -5  -5 -14 234.154 49.5641  -2
  10   5 -14 234.154 49.5641   1
  10   5 -13 458.572 38.8000   1
  -6  -5 -12 52.4220 43.4214  -2
  10   5 -12 52.4220 43.4214   1
  -6  -5 -11 1812.86 54.3976  -2
  10   5 -11 1812.86 54.3976   1
  10  -5 -10 2.50801 27.1943   1
  -7   5  -9 1380.29 35.4116  -2
  10  -5  -9 1380.29 35.4116   1
  10  -5  -8 3.90347 19.2461   1
  -7   5  -8 374.379 88.3464  -2
  10  -5  -8 374.379 88.3464   1
  10  -5  -7 885.336 52.7266   1
  -8   5  -6 234.598 57.9753  -2
  10  -5  -6 234.598 57.9753   1
  10   5  -5 238.586 31.0094   1
  10  -5  -4 272.477 23.3034   1
   9   5   3 228.928 31.6864  -2
 -10  -5   3 228.928 31.6864   1
 -10  -5   2 600.514 25.7469   1
  10  -5  -1 395.714 26.4336   1
  10   5   0 808.467 40.3300  -2
 -10  -5   0 808.467 40.3300   1
 -10  -5  -1 615.559 26.9940   1
  10  -5   2 230.742 31.1117   1
 -11  -5   3 1202.02 58.3876  -2
  10   5   3 1202.02 58.3876   1
  10   5   4 274.178 31.6134   1
  10   5   5 148.374 30.0788   1
 -12  -5   6 234.468 42.8300  -2
  10   5   6 234.468 42.8300   1
  10   5   7-9.20441 29.4012   1
 -13  -5   8 91.7039 42.0051  -2
  10   5   8 91.7039 42.0051   1
 -13   5   9 965.339 113.402  -2
  10  -5   9 965.339 113.402   1
  10  -5  10 41.9974 71.9981   1
 -14   5  11 650.543 109.981  -2
  10  -5  11 650.543 109.981   1
 -14   5  12 139.799 107.013  -2
  10  -5  12 139.799 107.013   1
  10  -5  13 684.851 93.8915   1
  10   6 -21-0.75267 86.7793   1
  -3  -6 -20-25.0319 111.101  -2
  10   6 -20-25.0319 111.101   1
  10   6 -19 45.5445 57.0871   1
  -4  -6 -18 259.607 75.5700  -2
  10   6 -18 259.607 75.5700   1
  -4  -6 -17 877.453 79.7125  -2
  10   6 -17 877.453 79.7125   1
  10   6 -16 16.4014 40.8204   1
  -5  -6 -15 611.022 58.6607  -2
  10   6 -15 611.022 58.6607   1
  -5  -6 -14 488.481 53.2031  -2
  10   6 -14 488.481 53.2031   1
  10   6 -13 181.718 36.2052   1
  -6  -6 -12 283.574 46.7510  -2
  10   6 -12 283.574 46.7510   1
  -6   6 -11 422.989 70.2334  -2
  10  -6 -11 422.989 70.2334   1
  10  -6 -10 37.0873 47.3183   1
  -7   6  -9 451.746 68.1180  -2
  10  -6  -9 451.746 68.1180   1
  10  -6  -8 244.168 66.1630   1
  -7   6  -8 1409.24 105.193  -2
  10  -6  -8 1409.24 105.193   1
  10  -6  -7 338.261 47.6629   1
  -8   6  -6 576.930 66.2217  -2
  10  -6  -6 576.930 66.2217   1
  10  -6  -5 1636.07 60.6591   1
  10  -6  -4 493.358 30.6682   1
  -9  -6  -3 2103.62 49.5357  -2
  10   6  -3 2103.62 49.5357   1
 -10  -6   2 317.136 23.1645   1
  10  -6  -1 584.300 25.9038   1
  10   6   0 42.2614 27.3547  -2
 -10  -6   0 42.2614 27.3547   1
  10   6   1 129.022 28.4337   1
  10  -6   2 12.5859 26.1720   1
 -11   6   3 166.070 38.2399  -2
  10  -6   3 166.070 38.2399   1
  10  -6   4 296.314 28.7297   1
  10  -6   5 531.665 32.2624   1
 -12   6   6 597.707 104.923  -2
  10  -6   6 597.707 104.923   1
  10  -6   7 461.194 74.8143   1
 -13   6   8 432.721 102.730  -2
  10  -6   8 432.721 102.730   1
 -13   6   9 594.721 109.167  -2
  10  -6   9 594.721 109.167   1
  10  -6  10 210.470 78.3045   1
 -14   6  11 494.702 113.617  -2
  10  -6  11 494.702 113.617   1
 -14   6  12 307.064 113.816  -2
  10  -6  12 307.064 113.816   1
  10  -6  13 52.3909 79.2691   1
  -4   7 -18 314.830 129.957  -2
  10  -7 -18 314.830 129.957   1
  -4   7 -17 8.06843 113.356  -2
  10  -7 -17 8.06843 113.356   1
  10  -7 -16 6.68563 60.9475   1
  -5   7 -15 15.2664 79.3718  -2
  10  -7 -15 15.2664 79.3718   1
  -5   7 -14 1481.76 89.6242  -2
  10  -7 -14 1481.76 89.6242   1
  10  -7 -13 22.1626 51.7229   1
  -6   7 -12 820.588 80.9540  -2
  10  -7 -12 820.588 80.9540   1
  -6   7 -11 43.6489 68.1671  -2
  10  -7 -11 43.6489 68.1671   1
  10  -7 -10 1513.90 67.7218   1
  -7   7  -9 56.0757 65.3388  -2
  10  -7  -9 56.0757 65.3388   1
  10  -7  -8 1500.80 65.9576   1
  10  -7  -7 112.606 45.2464   1
  -8   7  -6 1195.80 78.5642  -2
  10  -7  -6 1195.80 78.5642   1
  10  -7  -5 12.6969 41.5333   1
  10  -7  -4 142.303 26.5411   1
   9   7   3-0.07777 28.5557  -2
 -10  -7   3-0.07777 28.5557   1
  10  -7  -2 21.0849 24.3520   1
  10  -7  -1-11.8586 41.7731   1
 -10   7   0 370.490 93.6295  -2
  10  -7   0 370.490 93.6295   1
  10   7   1 4.75104 23.6529   1
  10   7   2 832.840 30.7092   1
 -11   7   3 326.538 97.3684  -2
  10  -7   3 326.538 97.3684   1
  10  -7   4 329.387 72.6682   1
  10  -7   5-4.48266 65.5663   1
 -12   7   6-6.31111 95.1496  -2
  10  -7   6-6.31111 95.1496   1
  10  -7   7 40.1642 71.5310   1
 -13   7   8 960.436 116.816  -2
  10  -7   8 960.436 116.816   1
 -13   7   9 0.55040 96.7620  -2
  10  -7   9 0.55040 96.7620   1
  10  -7  10 303.062 84.1166   1
 -14   7  11-19.5549 108.691  -2
  10  -7  11-19.5549 108.691   1
 -14   7  12 747.956 124.006  -2
  10  -7  12 747.956 124.006   1
  -4   8 -17 577.157 135.730  -2
  10  -8 -17 577.157 135.730   1
  10  -8 -16 194.910 63.0333   1
  -5   8 -15 257.071 81.0748  -2
  10  -8 -15 257.071 81.0748   1
  -5   8 -14 595.069 83.6749  -2
  10  -8 -14 595.069 83.6749   1
  10  -8 -13 87.2513 56.4101   1
  -6   8 -12 684.631 83.1408  -2
  10  -8 -12 684.631 83.1408   1
  -6   8 -11 153.604 72.9387  -2
  10  -8 -11 153.604 72.9387   1
  10  -8 -10 7.39502 51.2669   1
  -7   8  -9 202.028 69.5585  -2
  10  -8  -9 202.028 69.5585   1
  10  -8  -8 38.0756 48.5198   1
  10  -8  -7 314.689 50.7969   1
  -8   8  -6 419.722 69.1736  -2
  10  -8  -6 419.722 69.1736   1
  10  -8  -5 913.283 56.3764   1
  10  -8  -4 657.965 52.7107   1
  -9   8  -3 829.143 76.4118  -2
  10  -8  -3 829.143 76.4118   1
  10  -8  -2 255.572 46.4934   1
  10  -8  -1 186.956 45.6298   1
 -10   8   0 166.718 90.8116  -2
  10  -8   0 166.718 90.8116   1
  10  -8   1 32.8595 63.9171   1
  10  -8   2-22.7383 65.1382   1
 -11   8   3 382.922 101.099  -2
  10  -8   3 382.922 101.099   1
  10  -8   4 198.778 71.2468   1
  10  -8   5 268.109 77.0756   1
 -12   8   6 763.928 116.559  -2
  10  -8   6 763.928 116.559   1
  10  -8   7 311.088 79.3620   1
  10  -8   8 319.189 83.2528   1
 -13   8   9 381.487 115.143  -2
  10  -8   9 381.487 115.143   1
  10  -8  10 433.658 88.5294   1
 -14   8  11 311.656 116.265  -2
  10  -8  11 311.656 116.265   1
  -4   9 -17 152.998 127.124  -2
  10  -9 -17 152.998 127.124   1
  10  -9 -16-27.1367 62.5483   1
  -5   9 -15 455.059 86.5041  -2
  10  -9 -15 455.059 86.5041   1
  -5   9 -14 39.4240 80.8604  -2
  10  -9 -14 39.4240 80.8604   1
  10  -9 -13 396.499 63.8646   1
  -6   9 -12 30.3504 78.5156  -2
  10  -9 -12 30.3504 78.5156   1
  -6   9 -11 1118.02 84.7561  -2
  10  -9 -11 1118.02 84.7561   1
  10  -9 -10 7.58177 52.4587   1
  -7   9  -9 1284.29 88.5055  -2
  10  -9  -9 1284.29 88.5055   1
  10  -9  -8 15.5957 70.7700   1
  -7   9  -8 362.123 103.599  -2
  10  -9  -8 362.123 103.599   1
  10  -9  -7 1371.42 67.4752   1
  -8   9  -6 222.462 68.2865  -2
  10  -9  -6 222.462 68.2865   1
  10  -9  -5 713.371 55.7248   1
  10  -9  -4 21.1188 45.3627   1
  -9   9  -3 77.1217 63.8633  -2
  10  -9  -3 77.1217 63.8633   1
  10  -9  -2-0.18329 45.2787   1
  10  -9  -1 183.611 48.7595   1
 -10   9   0 18.2950 67.5093  -2
  10  -9   0 18.2950 67.5093   1
  10  -9   1 196.091 70.8530   1
  10  -9   2-29.2761 68.7279   1
 -11   9   3 818.792 118.731  -2
  10  -9   3 818.792 118.731   1
  10  -9   4 11.4302 73.3378   1
  10  -9   5 75.9073 75.5509   1
 -12   9   6 0.06593 85.1598  -2
  10  -9   6 0.06593 85.1598   1
  10  -9   7-27.4799 76.4486   1
 -13   9   8-0.51612 108.340  -2
  10  -9   8-0.51612 108.340   1
 -13   9   9 677.183 122.963  -2
  10  -9   9 677.183 122.963   1
  10  -9  10-27.7902 82.3308   1
  -4  10 -17 122.430 124.590  -2
  10 -10 -17 122.430 124.590   1
  10 -10 -16 166.564 92.6744   1
  -5  10 -15 413.597 88.1446  -2
  10 -10 -15 413.597 88.1446   1
  -5  10 -14 435.491 87.1472  -2
  10 -10 -14 435.491 87.1472   1
  10 -10 -13 14.0620 59.7759   1
  -6  10 -12 380.680 84.0668  -2
  10 -10 -12 380.680 84.0668   1
  -6  10 -11 368.833 83.4892  -2
  10 -10 -11 368.833 83.4892   1
  10 -10 -10 22.5439 56.3336   1
  -7  10  -9 300.392 78.6046  -2
  10 -10  -9 300.392 78.6046   1
  -7  10  -8 432.546 76.7447  -2
  10 -10  -8 432.546 76.7447   1
  10 -10  -7 159.721 52.1793   1
  -8  10  -6 441.115 77.4834  -2
  10 -10  -6 441.115 77.4834   1
  10 -10  -5 367.713 55.1963   1
  10 -10  -4 574.210 56.7061   1
  -9  10  -3 875.101 83.3474  -2
  10 -10  -3 875.101 83.3474   1
  10 -10  -2 203.322 51.1874   1
  10 -10  -1 42.3814 49.1517   1
 -10  10   0 148.716 72.5032  -2
  10 -10   0 148.716 72.5032   1
  10 -10   1 57.4311 71.1291   1
  10 -10   2 28.0179 74.2639   1
 -11  10   3 603.324 116.149  -2
  10 -10   3 603.324 116.149   1
  10 -10   4 140.761 79.0521   1
  10 -10   5 291.578 83.7365   1
 -12  10   6 1065.31 133.477  -2
  10 -10   6 1065.31 133.477   1
  10 -10   7 302.539 83.9191   1
 -13  10   8 213.127 114.381  -2
  10 -10   8 213.127 114.381   1
  10 -11 -16-19.0774 91.8677   1
  -5  11 -15 515.174 122.321  -2
  10 -11 -15 515.174 122.321   1
  -5  11 -14 562.967 123.890  -2
  10 -11 -14 562.967 123.890   1
  10 -11 -13 34.8475 62.8042   1
  -6  11 -12 694.768 91.2673  -2
  10 -11 -12 694.768 91.2673   1
  -6  11 -11 142.736 80.1127  -2
  10 -11 -11 142.736 80.1127   1
  10 -11 -10 684.971 66.8100   1
  -7  11  -9 104.994 76.2584  -2
  10 -11  -9 104.994 76.2584   1
  10 -11  -8 732.565 92.6335   1
  -7  11  -8 889.869 127.100  -2
  10 -11  -8 889.869 127.100   1
  10 -11  -7 103.927 55.1842   1
  -8  11  -6 1079.98 91.0777  -2
  10 -11  -6 1079.98 91.0777   1
  10 -11  -5 52.9443 53.1293   1
  10 -11  -4 66.9068 52.9229   1
  -9  11  -3 123.017 72.2942  -2
  10 -11  -3 123.017 72.2942   1
  10 -11  -2 65.0229 51.8879   1
  10 -11  -1 153.477 54.8630   1
 -10  11   0 786.619 73.1398  -2
  10 -11   0 786.619 73.1398   1
  10 -11   1 175.996 77.4628   1
  10 -11   2 424.209 84.6210   1
 -11  11   3 324.826 112.982  -2
  10 -11   3 324.826 112.982   1
  10 -11   4 351.051 86.5718   1
  10 -11   5 139.513 79.2420   1
 -12  11   6 107.546 114.896  -2
  10 -11   6 107.546 114.896   1
  10 -11   7 23.6528 79.5045   1
  -5  12 -15 868.026 132.839  -2
  10 -12 -15 868.026 132.839   1
  -5  12 -14 584.217 124.099  -2
  10 -12 -14 584.217 124.099   1
  10 -12 -13 272.961 90.2799   1
  -6  12 -12 193.879 118.491  -2
  10 -12 -12 193.879 118.491   1
  -6  12 -11 396.921 88.6495  -2
  10 -12 -11 396.921 88.6495   1
  10 -12 -10 0.59707 59.7491   1
  -7  12  -9 101.357 80.8074  -2
  10 -12  -9 101.357 80.8074   1
  10 -12  -8 65.4803 80.8885   1
  -7  12  -8 291.470 118.782  -2
  10 -12  -8 291.470 118.782   1
  10 -12  -7 396.157 62.4097   1
  -8  12  -6 245.035 79.8594  -2
  10 -12  -6 245.035 79.8594   1
  10 -12  -5 539.410 63.5511   1
  10 -12  -4 358.176 60.4356   1
  -9  12  -3 1137.74 97.7337  -2
  10 -12  -3 1137.74 97.7337   1
  10 -12  -2 160.214 55.9931   1
  10 -12  -1 307.037 59.6537   1
 -10  12   0 25.5977 58.0863  -2
  10 -12   0 25.5977 58.0863   1
  10 -12   1 85.2981 56.0371   1
  10 -12   2 36.7153 75.3703   1
 -11  12   3 122.386 89.8260  -2
  10 -12   3 122.386 89.8260   1
  10 -12   4-4.94802 82.1831   1
  10 -12   5 131.982 86.7139   1
  10 -13 -13 134.509 90.1025   1
  -6  13 -12 143.354 118.931  -2
  10 -13 -12 143.354 118.931   1
  -6  13 -11 456.911 125.570  -2
  10 -13 -11 456.911 125.570   1
  10 -13 -10 28.1381 89.0468   1
  -7  13  -9 635.307 124.468  -2
  10 -13  -9 635.307 124.468   1
  10 -13  -8 24.9706 60.7030   1
  10 -13  -7 305.946 63.2451   1
  -8  13  -6 192.045 82.5755  -2
  10 -13  -6 192.045 82.5755   1
  10 -13  -5 46.3671 57.8796   1
  10 -13  -4 21.2841 56.6481   1
  -9  13  -3 55.6125 78.0729  -2
  10 -13  -3 55.6125 78.0729   1
  10 -13  -2 32.6275 56.3220   1
  10 -13  -1 187.906 60.1924   1
 -10  13   0 397.521 88.9116  -2
  10 -13   0 397.521 88.9116   1
  10 -13   1 515.112 65.6122   1
  10 -13   2 269.002 84.2910   1
 -11  13   3 979.735 134.776  -2
  10 -13   3 979.735 134.776   1
  10 -14 -10-19.8333 86.8273   1
  -7  14  -9 172.168 116.457  -2
  10 -14  -9 172.168 116.457   1
  10 -14  -8 119.118 85.8172   1
  10 -14  -7 61.2155 84.3975   1
  -8  14  -6 297.693 120.498  -2
  10 -14  -6 297.693 120.498   1
  10 -14  -5 147.449 85.4502   1
  10 -14  -4 478.938 89.8436   1
  -9  14  -3 139.373 115.867  -2
  10 -14  -3 139.373 115.867   1
  10 -14  -2 495.152 92.8934   1
  10 -14  -1 64.6528 81.6537   1
 -10  14   0 260.576 115.069  -2
  10 -14   0 260.576 115.069   1
  11   0 -22 294.868 108.945   1
  -4   0 -20 239.371 126.039  -2
  11   0 -20 239.371 126.039   1
  -5   0 -18 270.328 111.733  -2
  11   0 -18 270.328 111.733   1
  11   0 -16 130.388 72.2039   1
  -6   0 -14 717.394 93.1015  -2
  11   0 -14 717.394 93.1015   1
  -7   0 -12 1270.65 70.7773  -2
  11   0 -12 1270.65 70.7773   1
  11   0 -10 1248.87 51.7512   1
  -8   0  -8 1004.02 53.5924  -2
  11   0  -8 1004.02 53.5924   1
  -9   0  -6 299.281 47.1940  -2
  11   0  -6 299.281 47.1940   1
  11   0  -4 34.9824 28.0071   1
  11   0  -2 940.601 36.3358   1
 -11   0   0 1720.82 46.3419  -2
  11   0   0 1720.82 46.3419   1
  11   0   2 438.783 35.3772   1
  11   0   4 58.0543 33.4746   1
 -13   0   6 150.749 76.9785  -2
  11   0   6 150.749 76.9785   1
  11   0   8 352.583 62.2539   1
  11   0  10 418.699 67.1639   1
 -15   0  12 391.101 96.8542  -2
  11   0  12 391.101 96.8542   1
 -16   0  14 1150.85 119.367  -2
  11   0  14 1150.85 119.367   1
  11   1 -22 28.7512 91.6394   1
  -4  -1 -21 188.954 90.6948  -2
  11   1 -21 188.954 90.6948   1
  -4  -1 -20 83.8707 87.0840  -2
  11   1 -20 83.8707 87.0840   1
  11   1 -19 137.368 59.2370   1
  -5   1 -18 233.497 78.8992  -2
  11  -1 -18 233.497 78.8992   1
  -5  -1 -17 679.075 79.8105  -2
  11   1 -17 679.075 79.8105   1
  11  -1 -16 126.194 51.0137   1
  -6   1 -15 90.4462 63.2567  -2
  11  -1 -15 90.4462 63.2567   1
  -6  -1 -14 175.030 52.3583  -2
  11   1 -14 175.030 52.3583   1
  11  -1 -13 77.9231 35.3543   1
  -7   1 -12 460.852 43.7353  -2
  11  -1 -12 460.852 43.7353   1
  -7  -1 -11 950.805 44.0693  -2
  11   1 -11 950.805 44.0693   1
 -11  -1  10 94.1727 21.9636   1
  -8  -1  -9 383.002 37.8735  -2
  11   1  -9 383.002 37.8735   1
  11   1  -8 160.373 30.2051   1
  -8  -1  -8 568.309 62.0869  -2
  11   1  -8 568.309 62.0869   1
  11   1  -7 522.714 26.8878   1
  -9   1  -6 711.070 36.2349  -2
  11  -1  -6 711.070 36.2349   1
  11  -1  -5 261.959 22.3292   1
  11  -1  -4 660.135 24.9416   1
 -10  -1  -3 1426.07 39.4424  -2
  11   1  -3 1426.07 39.4424   1
  11   1  -2 195.029 19.5628   1
  11   1  -1 87.1410 14.6783   1
 -11   1   0 41.5100 16.8670  -2
  11  -1   0 41.5100 16.8670   1
  11  -1   1 121.873 19.7644   1
  11   1   2 267.990 23.5731   1
 -12   1   3 1462.68 44.9056  -2
  11  -1   3 1462.68 44.9056   1
  11   1   4 590.678 31.8049   1
  11   1   5 709.653 46.3167   1
 -13  -1   6 519.319 59.9799  -2
  11   1   6 519.319 59.9799   1
  11  -1   7 588.460 46.4695   1
  11   1   8 322.652 43.1981   1
 -14  -1   9 202.625 56.1504  -2
  11   1   9 202.625 56.1504   1
  11   1  10 582.530 50.0123   1
 -15  -1  11 371.510 63.6162  -2
  11   1  11 371.510 63.6162   1
 -15  -1  12 328.891 65.4549  -2
  11   1  12 328.891 65.4549   1
  11   1  13-7.12526 46.7300   1
  11   1  14 21.0035 86.0077   1
 -16   1  14 51.8199 101.828  -2
  11  -1  14 51.8199 101.828   1
 -16   1  15 118.780 107.375  -2
  11  -1  15 118.780 107.375   1
  11   2 -22 86.5757 91.5065   1
  -4  -2 -21 435.907 92.7959  -2
  11   2 -21 435.907 92.7959   1
  -4  -2 -20 87.9242 85.4184  -2
  11   2 -20 87.9242 85.4184   1
  11  -2 -19 150.343 59.3477   1
  -5  -2 -18 1.84020 74.1294  -2
  11   2 -18 1.84020 74.1294   1
  -5  -2 -17 397.880 75.4452  -2
  11   2 -17 397.880 75.4452   1
  11   2 -16 24.2246 48.1664   1
  -6   2 -15 706.554 59.6770  -2
  11  -2 -15 706.554 59.6770   1
  -6  -2 -14 109.906 50.9673  -2
  11   2 -14 109.906 50.9673   1
  11  -2 -13 1117.58 46.3604   1
  -7  -2 -12 72.0700 44.2956  -2
  11   2 -12 72.0700 44.2956   1
  -7  -2 -11 1833.24 50.5479  -2
  11   2 -11 1833.24 50.5479   1
 -11  -2  10 3.12088 21.4214   1
  -8  -2  -9 1946.57 50.1203  -2
  11   2  -9 1946.57 50.1203   1
  11   2  -8 16.0358 35.3097   1
  -8  -2  -8 367.387 45.9698  -2
  11   2  -8 367.387 45.9698   1
  11   2  -7 573.853 26.8859   1
  -9   2  -6 234.179 30.0341  -2
  11  -2  -6 234.179 30.0341   1
  11  -2  -5 57.3416 18.6361   1
  11  -2  -4 89.3681 16.4953   1
 -10   2  -3 171.885 16.4764  -2
  11  -2  -3 171.885 16.4764   1
  11   2  -2 216.347 15.3105   1
  11   2  -1 554.704 14.4723   1
 -11  -2   0 419.098 19.7591  -2
  11   2   0 419.098 19.7591   1
  11   2   1 783.932 18.3848   1
  11   2   2 108.702 21.4809   1
 -12  -2   3 1031.10 43.1434  -2
  11   2   3 1031.10 43.1434   1
  11  -2   4 105.007 36.9370   1
  11  -2   5 18.3422 35.0777   1
 -13   2   6 183.956 51.3086  -2
  11  -2   6 183.956 51.3086   1
  11  -2   7 116.962 38.7320   1
  11   2   8-10.4543 37.4102   1
 -14  -2   9 1252.85 70.9669  -2
  11   2   9 1252.85 70.9669   1
  11   2  10-23.9323 39.6335   1
 -15  -2  11 259.309 59.8144  -2
  11   2  11 259.309 59.8144   1
 -15  -2  12 22.1610 54.1301  -2
  11   2  12 22.1610 54.1301   1
  11  -2  13 517.721 85.7379   1
 -16   2  14 45.5058 104.595  -2
  11  -2  14 45.5058 104.595   1
 -16   2  15 499.818 114.971  -2
  11  -2  15 499.818 114.971   1
  11   3 -22 48.0440 89.8589   1
  -4  -3 -21 84.8057 119.027  -2
  11   3 -21 84.8057 119.027   1
  -4  -3 -20 628.885 92.2415  -2
  11   3 -20 628.885 92.2415   1
  11   3 -19 37.3482 57.3666   1
  -5  -3 -18 703.037 80.3180  -2
  11   3 -18 703.037 80.3180   1
  -5  -3 -17 190.591 70.7501  -2
  11   3 -17 190.591 70.7501   1
  11   3 -16 397.950 53.2346   1
  -6   3 -15 13.3243 53.1070  -2
  11  -3 -15 13.3243 53.1070   1
  -6   3 -14 218.108 51.0821  -2
  11  -3 -14 218.108 51.0821   1
  11   3 -13 202.360 36.2018   1
  -7  -3 -12 489.601 49.0003  -2
  11   3 -12 489.601 49.0003   1
  -7  -3 -11 220.194 43.2351  -2
  11   3 -11 220.194 43.2351   1
  11   3 -10 137.060 26.9494   1
  -8  -3  -9 265.047 36.1333  -2
  11   3  -9 265.047 36.1333   1
  11   3  -8 702.306 28.5737   1
  11  -3  -7 506.849 24.5042   1
  -9   3  -6 1205.87 33.3966  -2
  11  -3  -6 1205.87 33.3966   1
  11  -3  -5 422.676 14.0207   1
  11  -3  -4 1308.15 41.5831   1
 -10   3  -3 1109.11 52.4141  -2
  11  -3  -3 1109.11 52.4141   1
  11  -3  -2 356.146 30.8089   1
  11   3  -1 12.2000 27.3340   1
 -11  -3   0 11.1883 38.1882  -2
  11   3   0 11.1883 38.1882   1
  11   3   1-4.07534 32.9014   1
  11   3   2 72.6444 10.7376   1
 -12  -3   3 716.157 58.3547  -2
  11   3   3 716.157 58.3547   1
  11  -3   4 398.183 39.4918   1
  11  -3   5 452.139 39.9786   1
 -13   3   6 1201.24 66.6258  -2
  11  -3   6 1201.24 66.6258   1
  11  -3   7 377.945 39.7559   1
  11  -3   8 606.507 77.1777   1
 -14  -3   8 597.759 68.5762  -2
  11   3   8 597.759 68.5762   1
 -14  -3   9 570.593 59.3848  -2
  11   3   9 570.593 59.3848   1
  11   3  10 93.9128 39.6061   1
 -15   3  11 368.633 102.192  -2
  11  -3  11 368.633 102.192   1
 -15   3  12 449.258 109.898  -2
  11  -3  12 449.258 109.898   1
  11  -3  13 61.3494 76.9450   1
 -16   3  14 279.752 110.116  -2
  11  -3  14 279.752 110.116   1
  -4  -4 -21 4.47644 269.662  -2
  11   4 -21 4.47644 269.662   1
  -4  -4 -20 357.360 89.4707  -2
  11   4 -20 357.360 89.4707   1
  11   4 -19 45.2388 57.8722   1
  -5  -4 -18 335.219 75.5896  -2
  11   4 -18 335.219 75.5896   1
  -5  -4 -17 108.708 68.7920  -2
  11   4 -17 108.708 68.7920   1
  11  -4 -16 60.6085 41.8156   1
  -6  -4 -15 190.838 54.3547  -2
  11   4 -15 190.838 54.3547   1
  -6   4 -14 861.099 56.2496  -2
  11  -4 -14 861.099 56.2496   1
  11   4 -13-7.83284 33.1364   1
  -7  -4 -12 1116.29 54.8249  -2
  11   4 -12 1116.29 54.8249   1
  -7  -4 -11 55.8611 41.0740  -2
  11   4 -11 55.8611 41.0740   1
  11   4 -10 591.163 34.1758   1
  -8   4  -9 193.763 36.3459  -2
  11  -4  -9 193.763 36.3459   1
  11  -4  -8 837.303 30.1846   1
  -8  -4  -8 1134.50 91.9400  -2
  11   4  -8 1134.50 91.9400   1
  11  -4  -7 223.440 16.8509   1
  -9   4  -6 468.937 46.6908  -2
  11  -4  -6 468.937 46.6908   1
  11  -4  -5 326.175 33.6596   1
  11  -4  -4 101.722 30.1123   1
 -10   4  -3 476.236 45.7434  -2
  11  -4  -3 476.236 45.7434   1
  11  -4  -2 644.477 35.4851   1
  11  -4  -1 581.599 34.9708   1
 -11   4   0 2257.73 79.2271  -2
  11  -4   0 2257.73 79.2271   1
  11  -4   1 711.729 42.1543   1
  11   4   2 675.735 41.8283   1
 -12   4   3 592.763 54.3266  -2
  11  -4   3 592.763 54.3266   1
  11  -4   4 300.927 36.8855   1
  11  -4   5 211.121 35.6267   1
 -13   4   6 227.266 50.3771  -2
  11  -4   6 227.266 50.3771   1
  11  -4   7-2.45536 34.0980   1
  11  -4   8 142.214 69.7270   1
 -14  -4   8 879.244 67.9062  -2
  11   4   8 879.244 67.9062   1
 -14   4   9 140.202 99.8556  -2
  11  -4   9 140.202 99.8556   1
  11  -4  10 659.046 85.6115   1
 -15   4  11 120.986 104.889  -2
  11  -4  11 120.986 104.889   1
 -15   4  12 596.578 113.104  -2
  11  -4  12 596.578 113.104   1
  11  -4  13 51.9237 77.4654   1
  11   5 -19 353.729 61.7958   1
  -5  -5 -18 40.7434 73.4278  -2
  11   5 -18 40.7434 73.4278   1
  -5   5 -17 1022.34 80.5620  -2
  11  -5 -17 1022.34 80.5620   1
  11  -5 -16-8.60032 40.8126   1
  -6  -5 -15 722.688 59.4321  -2
  11   5 -15 722.688 59.4321   1
  -6  -5 -14 319.583 52.2002  -2
  11   5 -14 319.583 52.2002   1
  11   5 -13 189.705 36.2243   1
  -7  -5 -12 296.577 46.3779  -2
  11   5 -12 296.577 46.3779   1
  -7  -5 -11 365.143 43.2113  -2
  11   5 -11 365.143 43.2113   1
  11  -5 -10 11.2241 26.0850   1
  -8   5  -9 378.358 69.6504  -2
  11  -5  -9 378.358 69.6504   1
  11  -5  -8 88.9901 45.5743   1
  11  -5  -7 1353.00 59.7593   1
  -9   5  -6 727.708 52.3462  -2
  11  -5  -6 727.708 52.3462   1
  11  -5  -5 1342.49 44.5040   1
  11  -5  -4 361.996 32.9310   1
 -10   5  -3 1072.93 53.2689  -2
  11  -5  -3 1072.93 53.2689   1
  11  -5  -2 61.1425 28.7729   1
  11  -5  -1 134.751 29.2710   1
 -11   5   0 6.18673 35.2921  -2
  11  -5   0 6.18673 35.2921   1
  11  -5   1 16.8645 30.6001   1
  11  -5   2 53.0872 31.0435   1
 -12   5   3 745.854 54.9697  -2
  11  -5   3 745.854 54.9697   1
  11   5   4 369.422 35.7900   1
  11   5   5 401.092 36.3723   1
 -13   5   6 342.399 49.1328  -2
  11  -5   6 342.399 49.1328   1
  11  -5   7 734.743 82.4415   1
  11  -5   8 167.778 74.5632   1
 -14   5   9 244.734 107.177  -2
  11  -5   9 244.734 107.177   1
  11  -5  10 221.188 78.9592   1
 -15   5  11 381.509 110.118  -2
  11  -5  11 381.509 110.118   1
 -15   5  12 108.124 108.943  -2
  11  -5  12 108.124 108.943   1
  11  -6 -19 80.1219 97.4244   1
  -5   6 -18 156.503 125.320  -2
  11  -6 -18 156.503 125.320   1
  -5   6 -17 26.6793 86.0140  -2
  11  -6 -17 26.6793 86.0140   1
  11  -6 -16-0.60362 61.1203   1
  -6   6 -15 564.199 84.0122  -2
  11  -6 -15 564.199 84.0122   1
  -6   6 -14 804.640 83.0809  -2
  11  -6 -14 804.640 83.0809   1
  11  -6 -13 293.932 58.9466   1
  -7   6 -12 124.917 72.0965  -2
  11  -6 -12 124.917 72.0965   1
  -7   6 -11 599.376 75.9305  -2
  11  -6 -11 599.376 75.9305   1
  11  -6 -10 53.0100 50.5252   1
  -8   6  -9 812.830 77.0090  -2
  11  -6  -9 812.830 77.0090   1
  11  -6  -8-20.9318 61.3120   1
  -8   6  -8 303.322 95.8630  -2
  11  -6  -8 303.322 95.8630   1
  11  -6  -7 219.550 48.7193   1
  -9   6  -6 322.363 62.8083  -2
  11  -6  -6 322.363 62.8083   1
  11  -6  -5 78.7416 43.3290   1
  11  -6  -4 129.496 31.1942   1
 -10  -6  -3 213.596 42.7370  -2
  11   6  -3 213.596 42.7370   1
  11  -6  -2 255.452 29.6901   1
  11  -6  -1 826.146 36.1807   1
 -11  -6   0 1136.87 59.3803  -2
  11   6   0 1136.87 59.3803   1
  11   6   1 532.910 35.9867   1
  11   6   2 499.921 35.8929   1
 -12   6   3 579.446 49.4900  -2
  11  -6   3 579.446 49.4900   1
  11  -6   4 68.2496 68.1372   1
  11  -6   5 26.2645 65.3834   1
 -13   6   6 55.7519 99.0928  -2
  11  -6   6 55.7519 99.0928   1
  11  -6   7-21.6945 71.9854   1
 -14   6   8 4.35615 104.298  -2
  11  -6   8 4.35615 104.298   1
 -14   6   9 615.143 114.677  -2
  11  -6   9 615.143 114.677   1
  11  -6  10 309.107 84.4629   1
 -15   6  11 314.734 109.933  -2
  11  -6  11 314.734 109.933   1
  -5   7 -18 827.335 140.710  -2
  11  -7 -18 827.335 140.710   1
  -5   7 -17 129.966 87.2447  -2
  11  -7 -17 129.966 87.2447   1
  11  -7 -16 623.991 71.8510   1
  -6   7 -15 278.629 83.7624  -2
  11  -7 -15 278.629 83.7624   1
  -6   7 -14 405.398 83.0125  -2
  11  -7 -14 405.398 83.0125   1
  11  -7 -13 34.2780 55.9931   1
  -7   7 -12 210.365 78.2910  -2
  11  -7 -12 210.365 78.2910   1
  -7   7 -11 5.51935 72.8269  -2
  11  -7 -11 5.51935 72.8269   1
  11  -7 -10 63.8563 50.9147   1
  -8   7  -9 82.0083 68.7957  -2
  11  -7  -9 82.0083 68.7957   1
  11  -7  -8 330.907 52.7653   1
  11  -7  -7 132.421 47.3565   1
  -9   7  -6 1443.07 84.1299  -2
  11  -7  -6 1443.07 84.1299   1
  11  -7  -5 299.187 49.2410   1
  11  -7  -4 1188.16 60.4052   1
 -10   7  -3 245.211 64.1009  -2
  11  -7  -3 245.211 64.1009   1
  11  -7  -2 552.397 50.7515   1
  11  -7  -1 17.1856 43.7448   1
 -11  -7   0 103.889 37.2704  -2
  11   7   0 103.889 37.2704   1
  11   7   1 3.95980 26.2161   1
  11  -7   2 24.0385 66.6253   1
 -12   7   3 117.560 95.6702  -2
  11  -7   3 117.560 95.6702   1
  11  -7   4 195.532 73.7060   1
  11  -7   5 23.0898 71.6230   1
 -13   7   6 1153.15 128.129  -2
  11  -7   6 1153.15 128.129   1
  11  -7   7-34.3292 71.7206   1
  11  -7   8 363.913 83.2190   1
 -14   7   9 39.3949 105.792  -2
  11  -7   9 39.3949 105.792   1
  11  -7  10-74.1547 78.3450   1
  -5   8 -17 71.9190 87.8182  -2
  11  -8 -17 71.9190 87.8182   1
  11  -8 -16 36.4985 63.6866   1
  -6   8 -15 855.836 91.1477  -2
  11  -8 -15 855.836 91.1477   1
  -6   8 -14 517.847 85.7315  -2
  11  -8 -14 517.847 85.7315   1
  11  -8 -13 141.485 60.6997   1
  -7   8 -12 184.685 80.1691  -2
  11  -8 -12 184.685 80.1691   1
  -7   8 -11 426.259 79.9098  -2
  11  -8 -11 426.259 79.9098   1
  11  -8 -10 127.020 56.0460   1
  -8   8  -9 300.324 74.2202  -2
  11  -8  -9 300.324 74.2202   1
  11  -8  -8 48.3731 51.2474   1
  11  -8  -7 42.3672 49.0651   1
  -9   8  -6 537.806 74.5656  -2
  11  -8  -6 537.806 74.5656   1
  11  -8  -5 143.117 48.9361   1
  11  -8  -4 231.700 49.1115   1
 -10   8  -3 535.998 74.1258  -2
  11  -8  -3 535.998 74.1258   1
  11  -8  -2 588.101 54.2338   1
  11  -8  -1 421.104 53.2987   1
 -11   8   0 1094.40 123.226  -2
  11  -8   0 1094.40 123.226   1
  11  -8   1 603.101 81.1527   1
  11  -8   2 696.321 83.3922   1
 -12   8   3 373.197 109.577  -2
  11  -8   3 373.197 109.577   1
  11  -8   4 131.129 76.2650   1
  11  -8   5 5.89244 73.9343   1
 -13   8   6 435.676 114.807  -2
  11  -8   6 435.676 114.807   1
  11  -8   7-51.9024 77.5743   1
 -14   8   8 258.888 109.878  -2
  11  -8   8 258.888 109.878   1
 -14   8   9 358.581 117.260  -2
  11  -8   9 358.581 117.260   1
  -5   9 -17 1078.27 150.169  -2
  11  -9 -17 1078.27 150.169   1
  11  -9 -16 5.02259 83.5629   1
  -6   9 -15 2203.83 106.492  -2
  11  -9 -15 2203.83 106.492   1
  -6   9 -14 39.2964 84.8184  -2
  11  -9 -14 39.2964 84.8184   1
  11  -9 -13 353.536 66.0938   1
  -7   9 -12 26.5870 81.6746  -2
  11  -9 -12 26.5870 81.6746   1
  -7   9 -11 540.934 85.1829  -2
  11  -9 -11 540.934 85.1829   1
  11  -9 -10 20.4330 55.1596   1
  -8   9  -9 21.7144 73.2199  -2
  11  -9  -9 21.7144 73.2199   1
  11  -9  -8 9.38181 54.2153   1
  11  -9  -7 442.896 58.1980   1
  -9   9  -6 197.897 72.1723  -2
  11  -9  -6 197.897 72.1723   1
  11  -9  -5 582.469 57.4756   1
  11  -9  -4 126.125 51.5652   1
 -10   9  -3 731.453 80.4312  -2
  11  -9  -3 731.453 80.4312   1
  11  -9  -2 7.84448 48.6611   1
  11  -9  -1 79.2361 50.4752   1
 -11   9   0 30.1752 69.1296  -2
  11  -9   0 30.1752 69.1296   1
  11  -9   1 16.5707 70.9991   1
  11  -9   2 33.3507 72.2487   1
 -12   9   3 204.016 108.000  -2
  11  -9   3 204.016 108.000   1
  11  -9   4 16.2465 74.5182   1
  11  -9   5 229.852 81.1075   1
 -13   9   6 99.1079 107.307  -2
  11  -9   6 99.1079 107.307   1
  11  -9   7 330.944 87.3970   1
 -14   9   8 78.0628 111.875  -2
  11  -9   8 78.0628 111.875   1
  11 -10 -16 17.1362 92.3698   1
  -6  10 -15 6534.17 195.702  -2
  11 -10 -15 6534.17 195.702   1
  -6  10 -14 624.577 92.0905  -2
  11 -10 -14 624.577 92.0905   1
  11 -10 -13 3.29237 61.7535   1
  -7  10 -12 334.326 87.4195  -2
  11 -10 -12 334.326 87.4195   1
  -7  10 -11 220.451 83.9403  -2
  11 -10 -11 220.451 83.9403   1
  11 -10 -10 302.560 61.8606   1
  -8  10  -9 359.405 83.1179  -2
  11 -10  -9 359.405 83.1179   1
  11 -10  -8 190.523 82.4609   1
  -8  10  -8 493.864 117.988  -2
  11 -10  -8 493.864 117.988   1
  11 -10  -7 80.3067 55.4218   1
  -9  10  -6 216.485 75.5245  -2
  11 -10  -6 216.485 75.5245   1
  11 -10  -5 263.576 55.7578   1
  11 -10  -4 185.029 54.1425   1
 -10  10  -3 683.516 84.4417  -2
  11 -10  -3 683.516 84.4417   1
  11 -10  -2 581.205 60.6000   1
  11 -10  -1 764.023 63.0295   1
 -11  10   0 1107.10 94.5944  -2
  11 -10   0 1107.10 94.5944   1
  11 -10   1 682.191 89.2984   1
  11 -10   2 571.960 87.9589   1
 -12  10   3 631.989 124.384  -2
  11 -10   3 631.989 124.384   1
  11 -10   4 139.543 80.3754   1
  11 -10   5 88.9629 79.6732   1
 -13  10   6 164.379 117.185  -2
  11 -10   6 164.379 117.185   1
  11 -10   7 32.9897 84.1723   1
  -6  11 -14 318.711 122.579  -2
  11 -11 -14 318.711 122.579   1
  11 -11 -13 1.98670 89.2804   1
  -7  11 -12 527.847 93.8033  -2
  11 -11 -12 527.847 93.8033   1
  -7  11 -11 146.276 85.8356  -2
  11 -11 -11 146.276 85.8356   1
  11 -11 -10 27.5784 59.8823   1
  -8  11  -9 174.986 84.2692  -2
  11 -11  -9 174.986 84.2692   1
  -8  11  -8 458.469 83.9069  -2
  11 -11  -8 458.469 83.9069   1
  11 -11  -7 80.6697 56.9623   1
  -9  11  -6 807.224 91.7681  -2
  11 -11  -6 807.224 91.7681   1
  11 -11  -5 211.544 59.9735   1
  11 -11  -4 840.713 66.8234   1
 -10  11  -3 272.254 81.0889  -2
  11 -11  -3 272.254 81.0889   1
  11 -11  -2 276.357 59.7348   1
  11 -11  -1-7.46638 53.5350   1
 -11  11   0 6.02428 66.2217  -2
  11 -11   0 6.02428 66.2217   1
  11 -11   1 101.765 55.7176   1
  11 -11   2 65.0872 79.6592   1
 -12  11   3 377.498 118.736  -2
  11 -11   3 377.498 118.736   1
  11 -11   4 79.4902 79.2902   1
  11 -11   5 196.769 85.2964   1
  11 -12 -13 351.663 99.7474   1
  -7  12 -12 60.6503 119.758  -2
  11 -12 -12 60.6503 119.758   1
  -7  12 -11 610.772 128.264  -2
  11 -12 -11 610.772 128.264   1
  11 -12 -10 14.1120 85.5162   1
  -8  12  -9 636.983 94.1856  -2
  11 -12  -9 636.983 94.1856   1
  -8  12  -8 225.420 85.0940  -2
  11 -12  -8 225.420 85.0940   1
  11 -12  -7 136.130 59.9376   1
  -9  12  -6 170.482 81.3761  -2
  11 -12  -6 170.482 81.3761   1
  11 -12  -5 3.32077 55.8400   1
  11 -12  -4 31.5856 56.9072   1
 -10  12  -3 169.909 81.8639  -2
  11 -12  -3 169.909 81.8639   1
  11 -12  -2 171.504 59.6294   1
  11 -12  -1 295.949 63.4397   1
 -11  12   0 607.928 69.6179  -2
  11 -12   0 607.928 69.6179   1
  11 -12   1 329.551 63.2533   1
  11 -12   2 293.518 84.5541   1
 -12  12   3 542.907 128.541  -2
  11 -12   3 542.907 128.541   1
  11 -13 -10-13.7508 90.9729   1
  -8  13  -9 274.656 120.038  -2
  11 -13  -9 274.656 120.038   1
  -8  13  -8 224.531 117.982  -2
  11 -13  -8 224.531 117.982   1
  11 -13  -7 379.349 93.2056   1
  -9  13  -6 272.026 124.215  -2
  11 -13  -6 272.026 124.215   1
  11 -13  -5 607.978 95.2737   1
  11 -13  -4 278.314 89.1477   1
 -10  13  -3 923.602 138.574  -2
  11 -13  -3 923.602 138.574   1
  11 -13  -2 7.56541 80.5859   1
  11 -13  -1-17.8474 81.3989   1
 -11  13   0 57.1261 115.042  -2
  11 -13   0 57.1261 115.042   1
  -5   0 -20 1371.23 149.050  -2
  12   0 -20 1371.23 149.050   1
  -6   0 -18 1135.64 126.533  -2
  12   0 -18 1135.64 126.533   1
  12   0 -16 933.829 88.0174   1
  -7   0 -14 751.060 74.8105  -2
  12   0 -14 751.060 74.8105   1
  -8   0 -12 101.092 58.2438  -2
  12   0 -12 101.092 58.2438   1
  12   0 -10 249.393 40.7789   1
  -9   0  -8 780.196 55.1606  -2
  12   0  -8 780.196 55.1606   1
 -10   0  -6 924.014 56.7134  -2
  12   0  -6 924.014 56.7134   1
  12   0  -4 547.995 36.1229   1
  12   0  -2 96.0415 28.6448   1
 -12   0   0 151.626 26.3899  -2
  12   0   0 151.626 26.3899   1
  12   0   2 595.577 65.4786   1
  12   0   4 694.233 70.6252   1
 -14   0   6 1223.86 106.252  -2
  12   0   6 1223.86 106.252   1
  12   0   8 22.5488 58.0150   1
  12   0  10 35.9975 61.2168   1
 -16   0  12 608.016 103.890  -2
  12   0  12 608.016 103.890   1
  -5   1 -21 280.755 90.6521  -2
  12  -1 -21 280.755 90.6521   1
  -5  -1 -20 131.390 86.8389  -2
  12   1 -20 131.390 86.8389   1
  12   1 -19 5.17989 59.4327   1
  -6  -1 -18 129.514 77.4684  -2
  12   1 -18 129.514 77.4684   1
  -6   1 -17 188.493 72.5221  -2
  12  -1 -17 188.493 72.5221   1
  12   1 -16 44.9062 48.5835   1
  -7  -1 -15 281.886 65.4664  -2
  12   1 -15 281.886 65.4664   1
  -7   1 -14 460.150 55.4745  -2
  12  -1 -14 460.150 55.4745   1
  12   1 -13 171.086 33.1996   1
  -8  -1 -12 287.403 42.6652  -2
  12   1 -12 287.403 42.6652   1
  -8   1 -11 269.080 40.0063  -2
  12  -1 -11 269.080 40.0063   1
  12  -1 -10 161.022 27.8776   1
  -9  -1  -9 1280.57 46.8366  -2
  12   1  -9 1280.57 46.8366   1
  12   1  -8 112.981 38.5678   1
  -9  -1  -8 536.781 47.0943  -2
  12   1  -8 536.781 47.0943   1
  12   1  -7 290.986 25.9452   1
 -10   1  -6 470.022 34.7864  -2
  12  -1  -6 470.022 34.7864   1
  12  -1  -5 571.712 25.6961   1
  12  -1  -4 601.784 25.8980   1
 -11  -1  -3 1517.73 41.6053  -2
  12   1  -3 1517.73 41.6053   1
  12   1  -2 499.886 19.1131   1
  12   1  -1 607.740 19.5185   1
 -12  -1   0 1041.42 29.3541  -2
  12   1   0 1041.42 29.3541   1
  12   1   1 654.826 28.7240   1
  12   1   2 118.782 38.6677   1
 -13  -1   3 222.255 55.7284  -2
  12   1   3 222.255 55.7284   1
  12   1   4 10.7761 39.4530   1
  12  -1   5 27.5101 39.5030   1
 -14   1   6 644.403 64.9534  -2
  12  -1   6 644.403 64.9534   1
  12  -1   7 318.952 44.4135   1
  12  -1   8 229.942 66.4641   1
 -15  -1   8 344.812 79.7225  -2
  12   1   8 344.812 79.7225   1
 -15  -1   9 427.405 65.3732  -2
  12   1   9 427.405 65.3732   1
  12   1  10 359.109 49.2061   1
 -16  -1  11 345.794 66.1026  -2
  12   1  11 345.794 66.1026   1
 -16  -1  12 124.734 65.3748  -2
  12   1  12 124.734 65.3748   1
  12  -1  13 298.366 78.9406   1
 -17   1  14 194.046 101.033  -2
  12  -1  14 194.046 101.033   1
  -5  -2 -21 905.568 133.776  -2
  12   2 -21 905.568 133.776   1
  -5  -2 -20 25.5711 85.3787  -2
  12   2 -20 25.5711 85.3787   1
  12   2 -19 896.142 71.5510   1
  -6  -2 -18 47.2071 73.8493  -2
  12   2 -18 47.2071 73.8493   1
  -6  -2 -17 797.664 79.2709  -2
  12   2 -17 797.664 79.2709   1
  12   2 -16 50.3060 47.5026   1
  -7   2 -15 862.322 61.9892  -2
  12  -2 -15 862.322 61.9892   1
  -7   2 -14 23.0065 50.5751  -2
  12  -2 -14 23.0065 50.5751   1
  12  -2 -13 66.9444 35.3224   1
  -8   2 -12 298.599 48.1742  -2
  12  -2 -12 298.599 48.1742   1
  -8  -2 -11 570.550 42.3809  -2
  12   2 -11 570.550 42.3809   1
  12   2 -10 32.1923 26.3716   1
  -9  -2  -9 782.054 41.4819  -2
  12   2  -9 782.054 41.4819   1
  12   2  -8 45.1534 28.1786   1
  -9  -2  -8 535.530 66.0314  -2
  12   2  -8 535.530 66.0314   1
  12   2  -7 1313.73 32.7219   1
 -10   2  -6 209.158 29.3376  -2
  12  -2  -6 209.158 29.3376   1
  12  -2  -5 807.471 24.5990   1
  12  -2  -4 113.752 16.7992   1
 -11   2  -3 735.999 20.5786  -2
  12  -2  -3 735.999 20.5786   1
  12   2  -2 4.02120 9.18124   1
  12   2  -1 19.6891 12.9033   1
 -12  -2   0 100.782 21.2247  -2
  12   2   0 100.782 21.2247   1
  12   2   1 143.439 17.7453   1
  12   2   2 72.1132 18.6318   1
 -13  -2   3 900.794 65.5019  -2
  12   2   3 900.794 65.5019   1
  12   2   4 73.4314 37.9183   1
  12   2   5 392.301 43.3492   1
 -14   2   6 148.517 56.1525  -2
  12  -2   6 148.517 56.1525   1
  12  -2   7 291.069 44.0034   1
  12  -2   8 20.8967 69.3679   1
 -15  -2   8 59.2629 67.3137  -2
  12   2   8 59.2629 67.3137   1
 -15   2   9 10.0855 51.1019  -2
  12  -2   9 10.0855 51.1019   1
  12   2  10-16.0668 41.5099   1
 -16   2  11 622.334 108.664  -2
  12  -2  11 622.334 108.664   1
 -16   2  12-13.2582 98.5329  -2
  12  -2  12-13.2582 98.5329   1
  12  -2  13 378.322 82.2421   1
  -5  -3 -20 150.628 85.4434  -2
  12   3 -20 150.628 85.4434   1
  12  -3 -19 135.724 58.3289   1
  -6  -3 -18 396.143 75.7363  -2
  12   3 -18 396.143 75.7363   1
  -6  -3 -17 64.4082 68.6126  -2
  12   3 -17 64.4082 68.6126   1
  12   3 -16 164.611 42.3471   1
  -7  -3 -15 264.678 56.1535  -2
  12   3 -15 264.678 56.1535   1
  -7  -3 -14 880.859 58.0031  -2
  12   3 -14 880.859 58.0031   1
  12  -3 -13 56.9564 35.2795   1
  -8   3 -12 1023.93 54.6609  -2
  12  -3 -12 1023.93 54.6609   1
  -8  -3 -11 342.889 43.6231  -2
  12   3 -11 342.889 43.6231   1
  12   3 -10 723.753 32.9534   1
  -9  -3  -9 287.700 35.8876  -2
  12   3  -9 287.700 35.8876   1
  12  -3  -8 107.378 25.8860   1
  -9  -3  -8 988.273 69.4978  -2
  12   3  -8 988.273 69.4978   1
  12  -3  -7 78.4336 18.5250   1
 -10   3  -6 88.8355 18.1683  -2
  12  -3  -6 88.8355 18.1683   1
  12  -3  -5 214.161 32.3182   1
  12  -3  -4 296.434 33.6098   1
 -11   3  -3 795.368 51.0485  -2
  12  -3  -3 795.368 51.0485   1
  12  -3  -2 648.344 35.7615   1
  12  -3  -1 723.990 37.1784   1
 -12   3   0 1725.74 54.5403  -2
  12  -3   0 1725.74 54.5403   1
  12  -3   1 420.652 42.4508   1
  12   3   2 462.453 42.8768   1
 -13  -3   3 172.415 52.6979  -2
  12   3   3 172.415 52.6979   1
  12   3   4 67.3473 36.2018   1
  12   3   5 0.82618 37.3127   1
 -14   3   6 690.129 63.1939  -2
  12  -3   6 690.129 63.1939   1
  12  -3   7 28.8655 37.8092   1
  12  -3   8 291.912 76.6357   1
 -15  -3   8 365.426 69.2055  -2
  12   3   8 365.426 69.2055   1
 -15   3   9 94.2323 55.2620  -2
  12  -3   9 94.2323 55.2620   1
  12  -3  10 349.508 79.7469   1
 -16   3  11 236.800 107.867  -2
  12  -3  11 236.800 107.867   1
 -16   3  12 329.423 108.675  -2
  12  -3  12 329.423 108.675   1
  12  -3  13-50.4585 79.8007   1
  12  -4 -19 35.9830 92.7995   1
  -6   4 -18 916.980 134.078  -2
  12  -4 -18 916.980 134.078   1
  -6   4 -17 195.107 117.191  -2
  12  -4 -17 195.107 117.191   1
  12   4 -16 347.462 45.4788   1
  12   4 -15-0.91565 53.2362   1
  -7   4 -15 47.5937 80.5516  -2
  12  -4 -15 47.5937 80.5516   1
  -7  -4 -14 405.674 52.9495  -2
  12   4 -14 405.674 52.9495   1
  12   4 -13-2.37717 33.3230   1
  -8  -4 -12 507.434 49.4140  -2
  12   4 -12 507.434 49.4140   1
  -8  -4 -11 344.249 43.0698  -2
  12   4 -11 344.249 43.0698   1
  12   4 -10 91.0462 27.9221   1
  -9   4  -9 267.845 54.4131  -2
  12  -4  -9 267.845 54.4131   1
  12  -4  -8 456.750 51.0078   1
  -9  -4  -8 459.131 87.2797  -2
  12   4  -8 459.131 87.2797   1
  12  -4  -7 143.520 35.9813   1
 -10   4  -6 1576.87 62.7557  -2
  12  -4  -6 1576.87 62.7557   1
  12  -4  -5 128.756 32.8563   1
  12  -4  -4 460.583 35.7404   1
 -11   4  -3 465.385 47.3757  -2
  12  -4  -3 465.385 47.3757   1
  12  -4  -2 97.3085 30.5195   1
  12  -4  -1 49.0066 29.4992   1
 -12   4   0 98.6260 34.5008  -2
  12  -4   0 98.6260 34.5008   1
  12   4   1 125.488 36.5311   1
  12   4   2 405.719 40.5574   1
 -13  -4   3 747.313 60.9446  -2
  12   4   3 747.313 60.9446   1
  12   4   4 462.782 41.6539   1
  12  -4   5 282.979 40.0414   1
 -14   4   6 673.287 62.1286  -2
  12  -4   6 673.287 62.1286   1
  12  -4   7 172.953 75.1725   1
  12  -4   8 194.597 77.4519   1
 -15   4   9 289.143 104.087  -2
  12  -4   9 289.143 104.087   1
  12  -4  10 11.3753 77.4830   1
 -16   4  11 128.472 103.840  -2
  12  -4  11 128.472 103.840   1
 -16   4  12 532.345 119.146  -2
  12  -4  12 532.345 119.146   1
  12  -5 -19 23.4546 94.4081   1
  -6   5 -18 155.873 124.763  -2
  12  -5 -18 155.873 124.763   1
  -6   5 -17 574.435 94.0831  -2
  12  -5 -17 574.435 94.0831   1
  12  -5 -16-7.43840 61.4825   1
  -7   5 -15 574.785 84.9110  -2
  12  -5 -15 574.785 84.9110   1
  -7   5 -14 965.068 85.9396  -2
  12  -5 -14 965.068 85.9396   1
  12  -5 -13 1032.20 68.7636   1
  -8   5 -12 78.5421 72.4113  -2
  12  -5 -12 78.5421 72.4113   1
  -8   5 -11 931.242 79.6172  -2
  12  -5 -11 931.242 79.6172   1
  12  -5 -10 67.1217 56.6252   1
  -9   5  -9 982.761 80.3127  -2
  12  -5  -9 982.761 80.3127   1
  12  -5  -8 32.3142 62.2375   1
  -9   5  -8 183.780 98.4231  -2
  12  -5  -8 183.780 98.4231   1
  12  -5  -7 144.080 36.2984   1
 -10   5  -6 222.659 48.1174  -2
  12  -5  -6 222.659 48.1174   1
  12  -5  -5 52.0457 32.0837   1
  12  -5  -4 416.867 35.7451   1
 -11   5  -3 649.152 51.0963  -2
  12  -5  -3 649.152 51.0963   1
  12  -5  -2 248.676 32.4775   1
  12  -5  -1 417.214 33.7995   1
 -12   5   0 462.298 47.1480  -2
  12  -5   0 462.298 47.1480   1
  12  -5   1 368.526 38.8592   1
  12  -5   2 163.568 37.8893   1
 -13  -5   3 161.757 49.2634  -2
  12   5   3 161.757 49.2634   1
  12   5   4 44.3248 34.0426   1
  12  -5   5 58.1300 72.2481   1
 -14   5   6 53.3664 87.4126  -2
  12  -5   6 53.3664 87.4126   1
  12  -5   7 279.175 80.1545   1
 -15   5   8 88.8142 103.528  -2
  12  -5   8 88.8142 103.528   1
 -15   5   9 1069.83 127.968  -2
  12  -5   9 1069.83 127.968   1
  12  -5  10 200.616 80.3198   1
  -6   6 -18 223.211 128.716  -2
  12  -6 -18 223.211 128.716   1
  -6   6 -17 518.962 94.6727  -2
  12  -6 -17 518.962 94.6727   1
  12  -6 -16 31.8489 61.9177   1
  -7   6 -15 672.253 87.5584  -2
  12  -6 -15 672.253 87.5584   1
  -7   6 -14 59.6552 78.5346  -2
  12  -6 -14 59.6552 78.5346   1
  12  -6 -13 90.4943 57.3643   1
  -8   6 -12 394.260 81.3780  -2
  12  -6 -12 394.260 81.3780   1
  -8   6 -11 580.786 78.4996  -2
  12  -6 -11 580.786 78.4996   1
  12  -6 -10 92.1951 53.8776   1
  -9   6  -9 261.843 72.3358  -2
  12  -6  -9 261.843 72.3358   1
  12  -6  -8 121.682 50.0613   1
  12  -6  -7 466.530 53.9278   1
 -10   6  -6 610.567 72.0858  -2
  12  -6  -6 610.567 72.0858   1
  12  -6  -5 516.185 53.4501   1
  12  -6  -4 239.359 34.2481   1
 -11   6  -3 510.408 49.3333  -2
  12  -6  -3 510.408 49.3333   1
  12   6  -2 93.8470 30.4904   1
  12   6  -1 26.9411 29.1942   1
 -12   6   0 345.669 44.7882  -2
  12  -6   0 345.669 44.7882   1
  12   6   1 414.111 38.0192   1
  12  -6   2 507.173 77.2383   1
 -13   6   3 1060.20 120.004  -2
  12  -6   3 1060.20 120.004   1
  12  -6   4 447.923 80.5747   1
  12  -6   5 569.775 86.3251   1
 -14   6   6 177.533 109.186  -2
  12  -6   6 177.533 109.186   1
  12  -6   7 424.602 84.8017   1
  12  -6   8 200.107 80.4712   1
 -15   6   9 303.335 111.269  -2
  12  -6   9 303.335 111.269   1
  12  -6  10 108.970 84.9191   1
  -6   7 -17 6.60313 89.7436  -2
  12  -7 -17 6.60313 89.7436   1
  12  -7 -16 308.579 68.4024   1
  -7   7 -15 1012.31 93.9346  -2
  12  -7 -15 1012.31 93.9346   1
  -7   7 -14 1195.68 95.9547  -2
  12  -7 -14 1195.68 95.9547   1
  12  -7 -13-3.57934 58.2072   1
  -8   7 -12 905.414 89.8649  -2
  12  -7 -12 905.414 89.8649   1
  -8   7 -11 60.6367 77.1935  -2
  12  -7 -11 60.6367 77.1935   1
  12  -7 -10 401.702 58.8468   1
  -9   7  -9 13.1312 72.8860  -2
  12  -7  -9 13.1312 72.8860   1
  12  -7  -8 162.636 72.7341   1
  -9   7  -8 537.735 111.324  -2
  12  -7  -8 537.735 111.324   1
  12  -7  -7 13.6841 50.1035   1
 -10   7  -6 2.81705 60.2760  -2
  12  -7  -6 2.81705 60.2760   1
  12  -7  -5 48.0213 47.1768   1
  12  -7  -4 313.606 49.9219   1
 -11   7  -3 168.467 66.3530  -2
  12  -7  -3 168.467 66.3530   1
  12  -7  -2 660.142 55.3734   1
  12  -7  -1 103.735 46.9508   1
 -12   7   0 1020.92 83.7314  -2
  12  -7   0 1020.92 83.7314   1
  12  -7   1 41.6720 70.0075   1
  12  -7   2 97.9548 73.5443   1
 -13   7   3 137.442 103.586  -2
  12  -7   3 137.442 103.586   1
  12  -7   4-8.67573 74.2508   1
  12  -7   5 4.23662 75.9520   1
 -14   7   6 368.643 115.229  -2
  12  -7   6 368.643 115.229   1
  12  -7   7 21.0578 79.0639   1
 -15   7   8 857.719 123.855  -2
  12  -7   8 857.719 123.855   1
 -15   7   9 19.5892 99.0951  -2
  12  -7   9 19.5892 99.0951   1
  12  -8 -16 109.616 66.4082   1
  -7   8 -15 1592.64 101.655  -2
  12  -8 -15 1592.64 101.655   1
  -7   8 -14 116.753 85.9015  -2
  12  -8 -14 116.753 85.9015   1
  12  -8 -13-2.46865 59.0400   1
  -8   8 -12 705.680 90.3981  -2
  12  -8 -12 705.680 90.3981   1
  -8   8 -11 255.675 82.6645  -2
  12  -8 -11 255.675 82.6645   1
  12  -8 -10 106.199 58.5125   1
  -9   8  -9 287.690 77.6754  -2
  12  -8  -9 287.690 77.6754   1
  -9   8  -8 421.460 78.6261  -2
  12  -8  -8 421.460 78.6261   1
  12  -8  -7 331.989 56.8170   1
 -10   8  -6 794.813 84.3755  -2
  12  -8  -6 794.813 84.3755   1
  12  -8  -5 155.555 51.5260   1
  12  -8  -4 221.059 52.5963   1
 -11   8  -3 325.951 73.2576  -2
  12  -8  -3 325.951 73.2576   1
  12  -8  -2 0.66547 49.6472   1
  12  -8  -1 50.3244 49.9936   1
 -12   8   0 221.057 73.9016  -2
  12  -8   0 221.057 73.9016   1
  12  -8   1 368.553 81.9138   1
  12  -8   2 519.220 86.5068   1
 -13   8   3 714.985 123.380  -2
  12  -8   3 714.985 123.380   1
  12  -8   4 506.203 88.8621   1
  12  -8   5 716.688 91.8645   1
 -14   8   6 574.910 126.088  -2
  12  -8   6 574.910 126.088   1
  12  -8   7 348.425 89.6928   1
  -7   9 -14 46.4328 87.6694  -2
  12  -9 -14 46.4328 87.6694   1
  12  -9 -13 875.979 76.3255   1
  -8   9 -12-7.12349 84.8698  -2
  12  -9 -12-7.12349 84.8698   1
  -8   9 -11 731.270 90.3987  -2
  12  -9 -11 731.270 90.3987   1
  12  -9 -10 23.5496 59.5303   1
  -9   9  -9 933.299 93.9896  -2
  12  -9  -9 933.299 93.9896   1
  12  -9  -8 10.3128 57.2378   1
  12  -9  -7 33.8938 53.9027   1
 -10   9  -6 122.193 74.6232  -2
  12  -9  -6 122.193 74.6232   1
  12  -9  -5 101.824 53.8310   1
  12  -9  -4 21.7051 53.3639   1
 -11   9  -3 171.378 75.7822  -2
  12  -9  -3 171.378 75.7822   1
  12  -9  -2 16.1500 53.2147   1
  12  -9  -1 177.063 54.4055   1
 -12   9   0 65.6002 63.3234  -2
  12  -9   0 65.6002 63.3234   1
  12  -9   1 204.612 79.7451   1
  12  -9   2-2.35893 77.0462   1
 -13   9   3 95.2599 110.832  -2
  12  -9   3 95.2599 110.832   1
  12  -9   4-31.1462 76.6230   1
  12  -9   5 28.4531 81.8488   1
 -14   9   6 37.0053 108.698  -2
  12  -9   6 37.0053 108.698   1
  -7  10 -14 73.0046 124.262  -2
  12 -10 -14 73.0046 124.262   1
  12 -10 -13-4.75769 63.2931   1
  -8  10 -12 497.963 92.0159  -2
  12 -10 -12 497.963 92.0159   1
  -8  10 -11 361.036 87.7704  -2
  12 -10 -11 361.036 87.7704   1
  12 -10 -10 88.1590 61.3171   1
  -9  10  -9 368.462 87.5182  -2
  12 -10  -9 368.462 87.5182   1
  12 -10  -8 456.467 93.8931   1
  -9  10  -8 620.327 121.962  -2
  12 -10  -8 620.327 121.962   1
  12 -10  -7 216.340 61.1956   1
 -10  10  -6 856.155 91.6290  -2
  12 -10  -6 856.155 91.6290   1
  12 -10  -5 78.2928 56.0222   1
  12 -10  -4 164.888 56.4928   1
 -11  10  -3 494.590 85.9313  -2
  12 -10  -3 494.590 85.9313   1
  12 -10  -2-1.26402 54.7589   1
  12 -10  -1 110.516 54.3121   1
 -12  10   0 157.396 66.9079  -2
  12 -10   0 157.396 66.9079   1
  12 -10   1 234.123 59.1406   1
  12 -10   2 298.843 85.3135   1
 -13  10   3 610.048 125.952  -2
  12 -10   3 610.048 125.952   1
  12 -10   4 290.755 84.7209   1
  -8  11 -11 76.9831 117.964  -2
  12 -11 -11 76.9831 117.964   1
  12 -11 -10 299.258 64.9089   1
  -9  11  -9 167.808 87.7286  -2
  12 -11  -9 167.808 87.7286   1
  -9  11  -8 600.581 88.8431  -2
  12 -11  -8 600.581 88.8431   1
  12 -11  -7 106.810 59.9121   1
 -10  11  -6 152.868 83.3941  -2
  12 -11  -6 152.868 83.3941   1
  12 -11  -5 152.094 61.3128   1
  12 -11  -4 197.025 59.5498   1
 -11  11  -3 249.374 85.7271  -2
  12 -11  -3 249.374 85.7271   1
  12 -11  -2 239.619 61.5411   1
  12 -11  -1 124.231 59.3084   1
 -12  11   0 817.912 94.7164  -2
  12 -11   0 817.912 94.7164   1
  12 -11   1 107.101 57.8648   1
  12 -11   2 305.026 91.3147   1
  -9  12  -8 274.504 124.266  -2
  12 -12  -8 274.504 124.266   1
  12 -12  -7 365.192 91.8744   1
 -10  12  -6 369.372 89.5150  -2
  12 -12  -6 369.372 89.5150   1
  12 -12  -5 364.109 67.2993   1
  12 -12  -4 91.5126 59.5702   1
 -11  12  -3 481.931 90.3736  -2
  12 -12  -3 481.931 90.3736   1
  12 -12  -2-48.8491 58.7643   1
  12 -12  -1 2.18703 59.1933   1
  -6   0 -20-10.5458 122.410  -2
  13   0 -20-10.5458 122.410   1
  -7   0 -18 917.815 122.843  -2
  13   0 -18 917.815 122.843   1
  13   0 -16 1025.99 88.6908   1
  -8   0 -14 1388.39 83.2096  -2
  13   0 -14 1388.39 83.2096   1
  -9   0 -12 927.729 69.0408  -2
  13   0 -12 927.729 69.0408   1
  13   0 -10 439.927 44.1639   1
 -10   0  -8 591.140 54.0624  -2
  13   0  -8 591.140 54.0624   1
 -11   0  -6 167.738 47.2256  -2
  13   0  -6 167.738 47.2256   1
  13   0  -4 581.757 37.2952   1
  13   0  -2 198.690 31.1905   1
 -13   0   0 440.764 46.5606  -2
  13   0   0 440.764 46.5606   1
  13   0   2 4.60970 29.1164   1
  13   0   4 61.1090 57.7020   1
 -15   0   6 1051.39 108.076  -2
  13   0   6 1051.39 108.076   1
  13   0   8 758.839 76.4867   1
  13   0  10 666.090 79.7466   1
 -17   0  12 240.924 101.905  -2
  13   0  12 240.924 101.905   1
  -6  -1 -20 441.398 93.2788  -2
  13   1 -20 441.398 93.2788   1
  13   1 -19 337.663 68.5247   1
  -7  -1 -18 75.1723 78.2057  -2
  13   1 -18 75.1723 78.2057   1
  -7  -1 -17 119.683 71.8882  -2
  13   1 -17 119.683 71.8882   1
  13   1 -16 46.3290 49.6739   1
  -8   1 -15 271.290 56.8558  -2
  13  -1 -15 271.290 56.8558   1
  -8   1 -14 53.4853 52.8403  -2
  13  -1 -14 53.4853 52.8403   1
  13   1 -13 25.8049 32.1717   1
  -9  -1 -12 536.644 45.8419  -2
  13   1 -12 536.644 45.8419   1
  -9  -1 -11 1098.69 46.8934  -2
  13   1 -11 1098.69 46.8934   1
  13   1 -10 454.215 31.6829   1
 -10  -1  -9 355.220 38.8549  -2
  13   1  -9 355.220 38.8549   1
  13   1  -8 155.944 30.5984   1
 -10  -1  -8 333.982 67.7810  -2
  13   1  -8 333.982 67.7810   1
  13   1  -7 513.404 28.3495   1
 -11  -1  -6 424.893 35.0535  -2
  13   1  -6 424.893 35.0535   1
  13  -1  -5 184.077 23.0664   1
  13  -1  -4 17.1580 20.5687   1
 -12  -1  -3 192.065 29.0163  -2
  13   1  -3 192.065 29.0163   1
  13   1  -2 120.716 20.2837   1
  13   1  -1 189.032 20.8797   1
 -13  -1   0 522.208 36.5451  -2
  13   1   0 522.208 36.5451   1
  13   1   1 591.464 34.9717   1
  13   1   2 624.611 49.9611   1
 -14  -1   3 1247.02 77.8146  -2
  13   1   3 1247.02 77.8146   1
  13   1   4 760.132 50.9723   1
  13   1   5 340.073 46.2078   1
 -15  -1   6 110.566 58.4062  -2
  13   1   6 110.566 58.4062   1
  13   1   7 68.0471 43.0898   1
  13   1   8 30.0775 57.2571   1
 -16   1   8 524.638 103.542  -2
  13  -1   8 524.638 103.542   1
 -16   1   9 198.258 64.5332  -2
  13  -1   9 198.258 64.5332   1
  13  -1  10-26.9285 45.6528   1
 -17   1  11 86.5809 101.064  -2
  13  -1  11 86.5809 101.064   1
 -17   1  12 186.278 103.099  -2
  13  -1  12 186.278 103.099   1
  -6   2 -20-109.758 128.505  -2
  13  -2 -20-109.758 128.505   1
  13  -2 -19 123.283 91.4444   1
  -7   2 -18 169.267 119.750  -2
  13  -2 -18 169.267 119.750   1
  -7   2 -17 1120.26 130.164  -2
  13  -2 -17 1120.26 130.164   1
  13   2 -16 6.27017 47.1429   1
  -8   2 -15 901.953 86.0461  -2
  13  -2 -15 901.953 86.0461   1
  -8   2 -14-9.81290 51.3269  -2
  13  -2 -14-9.81290 51.3269   1
  13   2 -13 1012.02 46.6540   1
  -9  -2 -12 41.7341 41.9544  -2
  13   2 -12 41.7341 41.9544   1
  -9  -2 -11 1092.24 47.7383  -2
  13   2 -11 1092.24 47.7383   1
  13   2 -10 3.45348 27.2379   1
 -10  -2  -9 622.124 40.8765  -2
  13   2  -9 622.124 40.8765   1
  13   2  -8 55.4665 28.2274   1
 -10  -2  -8 78.9004 65.1313  -2
  13   2  -8 78.9004 65.1313   1
  13   2  -7 16.3728 21.6452   1
 -11   2  -6 249.299 48.0966  -2
  13  -2  -6 249.299 48.0966   1
  13  -2  -5 347.191 36.2054   1
  13  -2  -4 219.396 34.1020   1
 -12   2  -3 873.380 53.1660  -2
  13  -2  -3 873.380 53.1660   1
  13   2  -2 14.9761 29.1359   1
  13   2  -1 558.069 35.1019   1
 -13  -2   0 51.8219 30.6497  -2
  13   2   0 51.8219 30.6497   1
  13   2   1 135.826 29.8623   1
  13   2   2 136.931 40.9473   1
 -14   2   3 4.15307 55.4870  -2
  13  -2   3 4.15307 55.4870   1
  13   2   4 0.60644 40.7753   1
  13   2   5 259.169 44.3841   1
 -15  -2   6 94.4579 57.4583  -2
  13   2   6 94.4579 57.4583   1
  13  -2   7 366.422 48.3557   1
  13  -2   8 95.0048 71.3815   1
 -16  -2   8-8.35029 71.3047  -2
  13   2   8-8.35029 71.3047   1
 -16   2   9 555.291 68.8239  -2
  13  -2   9 555.291 68.8239   1
  13  -2  10-11.9801 67.9887   1
 -17   2  11 398.884 111.725  -2
  13  -2  11 398.884 111.725   1
 -17   2  12 22.6018 103.184  -2
  13  -2  12 22.6018 103.184   1
  13  -3 -19-7.06017 90.7968   1
  -7   3 -18 471.560 127.709  -2
  13  -3 -18 471.560 127.709   1
  -7   3 -17 37.8595 117.269  -2
  13  -3 -17 37.8595 117.269   1
  13  -3 -16 116.953 60.8125   1
  -8   3 -15 32.0884 77.9808  -2
  13  -3 -15 32.0884 77.9808   1
  -8   3 -14 325.512 76.3031  -2
  13  -3 -14 325.512 76.3031   1
  13  -3 -13 82.1191 52.0251   1
  -9   3 -12 234.682 70.5377  -2
  13  -3 -12 234.682 70.5377   1
  -9   3 -11 668.838 77.3885  -2
  13  -3 -11 668.838 77.3885   1
  13   3 -10 441.330 42.8438   1
 -10  -3  -9 242.684 53.3727  -2
  13   3  -9 242.684 53.3727   1
  13  -3  -8 699.610 68.8946   1
 -10  -3  -8 1104.27 73.6673  -2
  13   3  -8 1104.27 73.6673   1
  13  -3  -7 64.7024 35.6996   1
 -11   3  -6 1193.34 61.1083  -2
  13  -3  -6 1193.34 61.1083   1
  13  -3  -5 70.4792 32.6927   1
  13  -3  -4 71.2774 31.9023   1
 -12   3  -3 157.527 44.8907  -2
  13  -3  -3 157.527 44.8907   1
  13  -3  -2 38.8709 30.2185   1
  13  -3  -1 393.169 35.3305   1
 -13  -3   0 198.761 45.1827  -2
  13   3   0 198.761 45.1827   1
  13   3   1 533.480 36.5280   1
  13   3   2 344.130 44.5649   1
 -14  -3   3 900.539 69.8469  -2
  13   3   3 900.539 69.8469   1
  13   3   4 467.855 45.5236   1
  13   3   5 306.030 44.3770   1
 -15  -3   6 76.7731 50.1865  -2
  13   3   6 76.7731 50.1865   1
  13  -3   7 131.418 40.8664   1
 -16   3   8 323.401 110.352  -2
  13  -3   8 323.401 110.352   1
 -16   3   9 352.400 110.901  -2
  13  -3   9 352.400 110.901   1
  13  -3  10 22.0251 76.6311   1
 -17   3  11 88.5412 106.409  -2
  13  -3  11 88.5412 106.409   1
  13  -4 -19-57.4313 101.551   1
  -7   4 -18 429.862 130.346  -2
  13  -4 -18 429.862 130.346   1
  -7   4 -17 77.7585 87.8054  -2
  13  -4 -17 77.7585 87.8054   1
  13  -4 -16 513.410 67.7010   1
  -8   4 -15 129.559 80.4354  -2
  13  -4 -15 129.559 80.4354   1
  -8   4 -14 1727.58 93.9591  -2
  13  -4 -14 1727.58 93.9591   1
  13  -4 -13 13.8988 53.7688   1
  -9   4 -12 1341.05 89.3329  -2
  13  -4 -12 1341.05 89.3329   1
  -9   4 -11 70.2434 69.2714  -2
  13  -4 -11 70.2434 69.2714   1
  13  -4 -10 370.185 54.0603   1
 -10   4  -9 370.039 58.4607  -2
  13  -4  -9 370.039 58.4607   1
  13  -4  -8-9.84101 45.9947   1
 -10  -4  -8 636.460 92.2698  -2
  13   4  -8 636.460 92.2698   1
  13  -4  -7 260.560 38.6449   1
 -11   4  -6 586.388 53.9106  -2
  13  -4  -6 586.388 53.9106   1
  13  -4  -5 363.840 37.5323   1
  13  -4  -4 173.198 35.0691   1
 -12   4  -3 653.066 52.6224  -2
  13  -4  -3 653.066 52.6224   1
  13  -4  -2 280.385 34.1944   1
  13  -4  -1 128.599 32.2546   1
 -13   4   0 434.144 49.3490  -2
  13  -4   0 434.144 49.3490   1
  13  -4   1 255.629 41.5184   1
  13   4   2 21.1530 37.4408   1
 -14  -4   3 59.1884 51.4974  -2
  13   4   3 59.1884 51.4974   1
  13   4   4 89.2193 39.1642   1
  13  -4   5 76.1916 72.7689   1
 -15   4   6 1147.49 127.749  -2
  13  -4   6 1147.49 127.749   1
  13  -4   7 33.7668 72.0777   1
  13  -4   8 596.109 90.9892   1
 -16   4   9 175.652 108.402  -2
  13  -4   9 175.652 108.402   1
  13  -4  10 201.810 81.9275   1
  -7   5 -18 37.3030 125.784  -2
  13  -5 -18 37.3030 125.784   1
  -7   5 -17 523.718 129.951  -2
  13  -5 -17 523.718 129.951   1
  13  -5 -16-23.3584 62.5561   1
  -8   5 -15 557.640 88.9361  -2
  13  -5 -15 557.640 88.9361   1
  -8   5 -14 76.9798 78.7339  -2
  13  -5 -14 76.9798 78.7339   1
  13  -5 -13 5.46089 56.5797   1
  -9   5 -12 349.160 80.4184  -2
  13  -5 -12 349.160 80.4184   1
  -9   5 -11 274.491 77.2046  -2
  13  -5 -11 274.491 77.2046   1
  13  -5 -10 45.8195 50.8804   1
 -10   5  -9 783.863 79.3968  -2
  13  -5  -9 783.863 79.3968   1
  13  -5  -8 55.8931 63.8964   1
 -10   5  -8 139.620 105.044  -2
  13  -5  -8 139.620 105.044   1
  13  -5  -7 452.478 41.4039   1
 -11   5  -6 295.993 52.3681  -2
  13  -5  -6 295.993 52.3681   1
  13  -5  -5 298.353 37.4736   1
  13  -5  -4 322.955 36.6502   1
 -12   5  -3 169.795 45.8971  -2
  13  -5  -3 169.795 45.8971   1
  13  -5  -2 4.10015 31.5946   1
  13  -5  -1 0.71363 31.5531   1
 -13   5   0 181.091 45.3280  -2
  13  -5   0 181.091 45.3280   1
  13  -5   1 254.869 40.7069   1
  13  -5   2 103.353 37.8184   1
 -14   5   3 443.188 112.807  -2
  13  -5   3 443.188 112.807   1
  13  -5   4 123.707 73.7129   1
  13  -5   5 53.9618 74.3354   1
 -15   5   6 127.779 103.877  -2
  13  -5   6 127.779 103.877   1
  13  -5   7 14.9566 74.8261   1
 -16   5   8 77.7687 108.118  -2
  13  -5   8 77.7687 108.118   1
 -16   5   9 210.316 111.607  -2
  13  -5   9 210.316 111.607   1
  -7   6 -17 320.499 129.146  -2
  13  -6 -17 320.499 129.146   1
  13  -6 -16 5.62944 63.3808   1
  -8   6 -15 1323.78 96.9849  -2
  13  -6 -15 1323.78 96.9849   1
  -8   6 -14 210.548 83.8575  -2
  13  -6 -14 210.548 83.8575   1
  13  -6 -13 404.356 64.9077   1
  -9   6 -12 69.9186 79.7492  -2
  13  -6 -12 69.9186 79.7492   1
  -9   6 -11 389.372 81.7506  -2
  13  -6 -11 389.372 81.7506   1
  13  -6 -10-16.0152 55.0386   1
 -10   6  -9 457.357 79.0136  -2
  13  -6  -9 457.357 79.0136   1
  13  -6  -8 105.257 53.5195   1
  13  -6  -7 88.6971 51.6486   1
 -11   6  -6 239.707 71.5944  -2
  13  -6  -6 239.707 71.5944   1
  13  -6  -5 464.022 40.5420   1
  13  -6  -4 347.026 37.8441   1
 -12   6  -3 898.411 58.4821  -2
  13  -6  -3 898.411 58.4821   1
  13  -6  -2 571.951 37.8606   1
  13  -6  -1 600.816 38.1041   1
 -13   6   0 233.999 61.0815  -2
  13  -6   0 233.999 61.0815   1
  13  -6   1 70.9964 74.1778   1
  13  -6   2 22.3303 72.9136   1
 -14   6   3 34.9930 101.793  -2
  13  -6   3 34.9930 101.793   1
  13  -6   4 85.5246 76.0284   1
  13  -6   5 125.006 76.6054   1
 -15   6   6 557.232 119.489  -2
  13  -6   6 557.232 119.489   1
  13  -6   7 296.151 85.6295   1
  13  -7 -16 186.303 92.1464   1
  -8   7 -15 1289.16 101.783  -2
  13  -7 -15 1289.16 101.783   1
  -8   7 -14 418.772 89.2096  -2
  13  -7 -14 418.772 89.2096   1
  13  -7 -13-17.2820 62.5548   1
  -9   7 -12 251.493 86.0354  -2
  13  -7 -12 251.493 86.0354   1
  -9   7 -11 109.670 80.7635  -2
  13  -7 -11 109.670 80.7635   1
  13  -7 -10 421.697 64.4099   1
 -10   7  -9 52.8080 74.9955  -2
  13  -7  -9 52.8080 74.9955   1
  13  -7  -8 869.240 67.9634   1
  13  -7  -7 90.4229 55.2321   1
 -11   7  -6 1144.87 89.6805  -2
  13  -7  -6 1144.87 89.6805   1
  13  -7  -5 45.8456 51.4088   1
  13  -7  -4 103.015 50.1071   1
 -12   7  -3 16.1690 69.2832  -2
  13  -7  -3 16.1690 69.2832   1
  13  -7  -2-19.8987 50.1040   1
  13  -7  -1-9.20715 48.8989   1
 -13   7   0 372.776 66.6562  -2
  13  -7   0 372.776 66.6562   1
  13  -7   1 9.12154 50.3295   1
  13  -7   2 416.901 86.6254   1
 -14   7   3-17.5461 106.489  -2
  13  -7   3-17.5461 106.489   1
  13  -7   4 305.410 81.8641   1
  13  -7   5-25.7841 77.4762   1
 -15   7   6 41.4823 97.9029  -2
  13  -7   6 41.4823 97.9029   1
  13  -7   7-25.3278 82.8848   1
  -8   8 -15 188.339 129.961  -2
  13  -8 -15 188.339 129.961   1
  -8   8 -14 368.826 89.9020  -2
  13  -8 -14 368.826 89.9020   1
  13  -8 -13 314.483 67.8105   1
  -9   8 -12 34.6056 85.5416  -2
  13  -8 -12 34.6056 85.5416   1
  -9   8 -11 152.741 83.6460  -2
  13  -8 -11 152.741 83.6460   1
  13  -8 -10-5.52688 59.2505   1
 -10   8  -9 264.783 83.3901  -2
  13  -8  -9 264.783 83.3901   1
  13  -8  -8 47.7381 84.2869   1
 -10   8  -8 448.972 114.441  -2
  13  -8  -8 448.972 114.441   1
  13  -8  -7 112.765 55.8864   1
 -11   8  -6 411.199 80.8501  -2
  13  -8  -6 411.199 80.8501   1
  13  -8  -5 194.967 58.1881   1
  13  -8  -4 638.344 63.3935   1
 -12   8  -3 592.880 84.5710  -2
  13  -8  -3 592.880 84.5710   1
  13  -8  -2 625.972 62.8579   1
  13  -8  -1 236.641 57.7173   1
 -13   8   0 662.303 73.9136  -2
  13  -8   0 662.303 73.9136   1
  13  -8   1 119.489 55.3448   1
  13  -8   2 79.8706 78.3781   1
 -14   8   3 62.8008 88.2729  -2
  13  -8   3 62.8008 88.2729   1
  13  -8   4-38.1095 81.5855   1
  13  -8   5 71.2360 79.5706   1
  13  -9 -13 38.5325 93.0027   1
  -9   9 -12 38.9368 88.0938  -2
  13  -9 -12 38.9368 88.0938   1
  -9   9 -11 467.361 91.2167  -2
  13  -9 -11 467.361 91.2167   1
  13  -9 -10-4.66498 60.9097   1
 -10   9  -9 739.506 91.6142  -2
  13  -9  -9 739.506 91.6142   1
  13  -9  -8 52.4147 57.7698   1
  13  -9  -7 642.695 66.1678   1
 -11   9  -6 50.2816 77.7031  -2
  13  -9  -6 50.2816 77.7031   1
  13  -9  -5 284.618 60.8226   1
  13  -9  -4-11.4079 54.8668   1
 -12   9  -3 13.2258 75.0430  -2
  13  -9  -3 13.2258 75.0430   1
  13  -9  -2 15.2314 53.8346   1
  13  -9  -1 55.5978 56.4379   1
 -13   9   0 6.35918 66.7417  -2
  13  -9   0 6.35918 66.7417   1
  13  -9   1 309.630 59.4174   1
  13  -9   2 5.89762 80.5998   1
 -14   9   3 617.349 128.184  -2
  13  -9   3 617.349 128.184   1
  -9  10 -11-31.3481 121.234  -2
  13 -10 -11-31.3481 121.234   1
  13 -10 -10 74.5400 63.7768   1
 -10  10  -9 335.047 88.0044  -2
  13 -10  -9 335.047 88.0044   1
 -10  10  -8 323.911 87.7222  -2
  13 -10  -8 323.911 87.7222   1
  13 -10  -7 140.487 62.5914   1
 -11  10  -6 188.062 82.8791  -2
  13 -10  -6 188.062 82.8791   1
  13 -10  -5 460.569 65.0911   1
  13 -10  -4 270.988 62.4296   1
 -12  10  -3 579.433 91.9045  -2
  13 -10  -3 579.433 91.9045   1
  13 -10  -2 265.384 60.7360   1
  13 -10  -1 214.066 60.2863   1
 -13  10   0 386.956 87.1773  -2
  13 -10   0 386.956 87.1773   1
  13 -10   1 135.265 59.9190   1
  13 -10   2 88.1705 81.3516   1
  13 -11  -7 63.3949 87.7535   1
 -11  11  -6 827.116 135.243  -2
  13 -11  -6 827.116 135.243   1
  13 -11  -5-2.82806 58.4506   1
  13 -11  -4-20.5972 59.7516   1
 -12  11  -3 42.7472 92.3689  -2
  13 -11  -3 42.7472 92.3689   1
  13 -11  -2 0.43755 83.2636   1
  13 -11  -1 54.5222 79.9181   1
 -13  11   0 165.381 119.259  -2
  13 -11   0 165.381 119.259   1
  -9   0 -14 717.204 75.8553  -2
  14   0 -14 717.204 75.8553   1
 -10   0 -12 523.767 66.0262  -2
  14   0 -12 523.767 66.0262   1
  14   0 -10 418.643 46.3860   1
 -11   0  -8 1304.08 62.4597  -2
  14   0  -8 1304.08 62.4597   1
 -12   0  -6 1283.60 124.749  -2
  14   0  -6 1283.60 124.749   1
  14   0  -4 17.7376 65.5398   1
  14   0  -2 74.3750 65.9644   1
 -14   0   0 114.243 89.2983  -2
  14   0   0 114.243 89.2983   1
  14   0   2 207.041 66.2562   1
  14   0   4 40.1079 60.6680   1
 -16   0   6 40.1612 85.2716  -2
  14   0   6 40.1612 85.2716   1
 -17   0   8 462.634 101.742  -2
  14   0   8 462.634 101.742   1
  14   0  10 437.798 78.5797   1
  14  -1 -19-32.4544 90.0216   1
  -8   1 -18 116.681 117.362  -2
  14  -1 -18 116.681 117.362   1
  -8   1 -17 575.646 117.465  -2
  14  -1 -17 575.646 117.465   1
  14  -1 -16 177.547 75.5569   1
  -9   1 -15 299.763 75.9015  -2
  14  -1 -15 299.763 75.9015   1
  -9   1 -14 189.093 71.0473  -2
  14  -1 -14 189.093 71.0473   1
  14   1 -13 143.381 42.4243   1
 -10  -1 -12 324.241 56.7907  -2
  14   1 -12 324.241 56.7907   1
 -10  -1 -11 186.091 52.7888  -2
  14   1 -11 186.091 52.7888   1
  14   1 -10 100.211 37.1151   1
 -11  -1  -9 225.497 51.4666  -2
  14   1  -9 225.497 51.4666   1
  14  -1  -8 300.539 52.4455   1
 -11  -1  -8 555.307 74.4533  -2
  14   1  -8 555.307 74.4533   1
  14   1  -7 453.260 39.4248   1
 -12  -1  -6 716.355 54.6940  -2
  14   1  -6 716.355 54.6940   1
  14   1  -5 814.076 40.8963   1
  14  -1  -4 682.891 38.5824   1
 -13   1  -3 1114.25 57.9981  -2
  14  -1  -3 1114.25 57.9981   1
  14  -1  -2 612.254 36.7927   1
  14   1  -1 108.976 30.7096   1
 -14  -1   0 379.314 45.1508  -2
  14   1   0 379.314 45.1508   1
  14   1   1 75.9191 45.3166   1
  14   1   2 13.5796 45.2387   1
 -15  -1   3 297.055 66.1503  -2
  14   1   3 297.055 66.1503   1
  14   1   4 63.4078 44.0959   1
  14   1   5 271.974 47.8604   1
 -16  -1   6 633.005 73.1480  -2
  14   1   6 633.005 73.1480   1
  14   1   7 319.632 50.9730   1
  14   1   8 299.712 50.3535   1
 -17   1   9 334.387 104.897  -2
  14  -1   9 334.387 104.897   1
  14  -1  10 209.785 76.1170   1
  14  -2 -19 338.278 97.7033   1
  -8   2 -18-19.6178 119.030  -2
  14  -2 -18-19.6178 119.030   1
  -8   2 -17 174.844 114.617  -2
  14  -2 -17 174.844 114.617   1
  14  -2 -16 9.95272 58.5789   1
  -9   2 -15 388.787 80.8012  -2
  14  -2 -15 388.787 80.8012   1
  -9   2 -14 16.8659 71.8160  -2
  14  -2 -14 16.8659 71.8160   1
  14  -2 -13 735.667 59.7572   1
 -10  -2 -12 81.0222 56.6402  -2
  14   2 -12 81.0222 56.6402   1
 -10  -2 -11 786.907 61.8272  -2
  14   2 -11 786.907 61.8272   1
  14   2 -10 42.6528 37.5978   1
 -11  -2  -9 1622.97 68.0737  -2
  14   2  -9 1622.97 68.0737   1
  14  -2  -8 54.2451 51.4757   1
 -11  -2  -8 60.9861 70.5543  -2
  14   2  -8 60.9861 70.5543   1
  14   2  -7 749.860 43.0299   1
 -12   2  -6 76.7452 47.0601  -2
  14  -2  -6 76.7452 47.0601   1
  14  -2  -5 156.249 35.3212   1
  14  -2  -4 1.41029 32.4954   1
 -13   2  -3 21.9200 38.5830  -2
  14  -2  -3 21.9200 38.5830   1
  14  -2  -2 21.7136 30.5400   1
  14   2  -1 243.122 33.1105   1
 -14  -2   0 74.2600 34.9585  -2
  14   2   0 74.2600 34.9585   1
  14   2   1 205.355 32.8780   1
  14   2   2 92.8197 32.3037   1
 -15  -2   3 381.488 66.1565  -2
  14   2   3 381.488 66.1565   1
  14   2   4 78.6736 44.6523   1
  14  -2   5 3.12512 42.9997   1
 -16  -2   6 15.3134 61.5118  -2
  14   2   6 15.3134 61.5118   1
  14   2   7-4.07589 44.6289   1
 -17   2   8 48.2140 99.8972  -2
  14  -2   8 48.2140 99.8972   1
 -17   2   9 434.472 114.450  -2
  14  -2   9 434.472 114.450   1
  14  -2  10 10.9040 75.9619   1
  14  -3 -19 42.5861 94.1813   1
  -8   3 -18 491.383 131.372  -2
  14  -3 -18 491.383 131.372   1
  -8   3 -17 48.1486 118.193  -2
  14  -3 -17 48.1486 118.193   1
  14  -3 -16 392.822 67.3693   1
  -9   3 -15 34.8002 79.1378  -2
  14  -3 -15 34.8002 79.1378   1
  -9   3 -14 552.323 79.6391  -2
  14  -3 -14 552.323 79.6391   1
  14  -3 -13-12.2410 51.6324   1
 -10   3 -12 486.417 76.5440  -2
  14  -3 -12 486.417 76.5440   1
 -10  -3 -11 153.987 57.5922  -2
  14   3 -11 153.987 57.5922   1
  14   3 -10 14.8822 40.0530   1
 -11  -3  -9 490.052 59.4474  -2
  14   3  -9 490.052 59.4474   1
  14  -3  -8 55.7607 57.0930   1
 -11  -3  -8 1289.44 78.8988  -2
  14   3  -8 1289.44 78.8988   1
  14   3  -7 655.273 43.9084   1
 -12   3  -6 623.252 56.5936  -2
  14  -3  -6 623.252 56.5936   1
  14  -3  -5 437.656 39.7803   1
  14  -3  -4 424.265 38.4998   1
 -13   3  -3 857.429 57.5113  -2
  14  -3  -3 857.429 57.5113   1
  14  -3  -2 111.232 33.2828   1
  14  -3  -1 430.632 36.7125   1
 -14  -3   0 140.624 40.3813  -2
  14   3   0 140.624 40.3813   1
  14   3   1 14.3626 31.9438   1
  14   3   2 4.48523 31.4128   1
 -15  -3   3 479.559 66.4016  -2
  14   3   3 479.559 66.4016   1
  14   3   4 170.065 43.7025   1
  14  -3   5 30.4361 72.6516   1
 -16   3   6 892.058 126.670  -2
  14  -3   6 892.058 126.670   1
  14  -3   7 76.5103 77.6612   1
 -17   3   8 184.999 107.043  -2
  14  -3   8 184.999 107.043   1
 -17   3   9 158.270 103.793  -2
  14  -3   9 158.270 103.793   1
  -8   4 -18 277.496 130.158  -2
  14  -4 -18 277.496 130.158   1
  -8   4 -17 126.826 122.646  -2
  14  -4 -17 126.826 122.646   1
  14  -4 -16 36.9044 85.0639   1
  -9   4 -15 120.354 82.9791  -2
  14  -4 -15 120.354 82.9791   1
  -9   4 -14 2144.75 113.665  -2
  14  -4 -14 2144.75 113.665   1
  14  -4 -13 122.521 56.7582   1
 -10   4 -12 547.490 80.4273  -2
  14  -4 -12 547.490 80.4273   1
 -10   4 -11 418.580 76.3024  -2
  14  -4 -11 418.580 76.3024   1
  14  -4 -10 569.557 59.8010   1
 -11  -4  -9 44.8089 54.1068  -2
  14   4  -9 44.8089 54.1068   1
  14  -4  -8 614.471 72.4902   1
 -11  -4  -8 889.955 77.4738  -2
  14   4  -8 889.955 77.4738   1
  14  -4  -7 38.1065 37.1964   1
 -12   4  -6 1037.06 62.4157  -2
  14  -4  -6 1037.06 62.4157   1
  14  -4  -5 4.21685 35.2052   1
  14  -4  -4-4.02602 34.3782   1
 -13   4  -3 16.0100 46.2606  -2
  14  -4  -3 16.0100 46.2606   1
  14  -4  -2 112.824 34.3048   1
  14  -4  -1 127.586 34.2545   1
 -14   4   0 748.143 52.3286  -2
  14  -4   0 748.143 52.3286   1
  14  -4   1 294.146 36.1275   1
  14  -4   2 553.897 49.4469   1
 -15   4   3 426.006 112.787  -2
  14  -4   3 426.006 112.787   1
  14  -4   4 244.979 81.3305   1
  14  -4   5 53.4840 73.4455   1
 -16   4   6 113.712 104.053  -2
  14  -4   6 113.712 104.053   1
  14  -4   7 2.75974 77.3494   1
  14  -4   8 121.504 80.7029   1
  -8   5 -17 1089.13 143.504  -2
  14  -5 -17 1089.13 143.504   1
  14  -5 -16 2.94837 86.9613   1
  14  -5 -15 1024.26 111.262   1
  -9   5 -15 803.727 130.013  -2
  14  -5 -15 803.727 130.013   1
  -9   5 -14 126.450 81.8058  -2
  14  -5 -14 126.450 81.8058   1
  14  -5 -13 613.740 67.8578   1
 -10   5 -12 164.516 80.1488  -2
  14  -5 -12 164.516 80.1488   1
 -10   5 -11 527.594 81.6815  -2
  14  -5 -11 527.594 81.6815   1
  14  -5 -10 33.5763 54.6214   1
 -11   5  -9 185.118 75.8761  -2
  14  -5  -9 185.118 75.8761   1
  14  -5  -8 169.220 53.8848   1
  14  -5  -7 84.3422 39.3532   1
 -12   5  -6 80.3324 51.9388  -2
  14  -5  -6 80.3324 51.9388   1
  14  -5  -5 324.732 38.7140   1
  14  -5  -4 387.220 39.4233   1
 -13   5  -3 441.172 53.3559  -2
  14  -5  -3 441.172 53.3559   1
  14  -5  -2 65.6096 33.4563   1
  14  -5  -1 214.847 35.1669   1
 -14   5   0 121.547 57.8279  -2
  14  -5   0 121.547 57.8279   1
  14  -5   1-16.3602 46.0772   1
  14  -5   2 1.48419 71.7020   1
 -15   5   3 464.787 117.313  -2
  14  -5   3 464.787 117.313   1
  14  -5   4-11.3354 79.0864   1
  14  -5   5 353.872 83.7779   1
 -16   5   6 108.301 108.802  -2
  14  -5   6 108.301 108.802   1
  14  -5   7 234.387 81.6368   1
  14  -6 -16-1.04033 90.6475   1
  -9   6 -15 385.639 126.619  -2
  14  -6 -15 385.639 126.619   1
  -9   6 -14 153.278 87.0822  -2
  14  -6 -14 153.278 87.0822   1
  14  -6 -13 145.508 63.1478   1
 -10   6 -12 171.080 84.7833  -2
  14  -6 -12 171.080 84.7833   1
 -10   6 -11 423.397 84.2309  -2
  14  -6 -11 423.397 84.2309   1
  14  -6 -10 83.7369 57.9862   1
 -11   6  -9 518.834 84.0651  -2
  14  -6  -9 518.834 84.0651   1
  14  -6  -8 38.6235 55.1137   1
  14  -6  -7 201.210 56.4216   1
 -12   6  -6 174.948 74.6888  -2
  14  -6  -6 174.948 74.6888   1
  14  -6  -5 31.5175 35.6005   1
  14  -6  -4 125.001 36.7249   1
 -13   6  -3 34.9549 63.0164  -2
  14  -6  -3 34.9549 63.0164   1
  14  -6  -2 344.675 55.3640   1
  14  -6  -1 535.600 56.4953   1
 -14   6   0 503.215 79.4861  -2
  14  -6   0 503.215 79.4861   1
  14  -6   1 546.366 56.8749   1
  14  -6   2 527.008 87.3024   1
 -15   6   3 721.093 125.939  -2
  14  -6   3 721.093 125.939   1
  14  -6   4 186.345 82.9295   1
  14  -6   5 227.143 82.7735   1
  -9   7 -15-84.1497 127.371  -2
  14  -7 -15-84.1497 127.371   1
  -9   7 -14 887.206 136.708  -2
  14  -7 -14 887.206 136.708   1
  14  -7 -13-21.6473 62.3223   1
 -10   7 -12 714.997 94.5804  -2
  14  -7 -12 714.997 94.5804   1
 -10   7 -11-65.9706 84.3505  -2
  14  -7 -11-65.9706 84.3505   1
  14  -7 -10 3.36383 60.1554   1
 -11   7  -9 28.8905 74.8645  -2
  14  -7  -9 28.8905 74.8645   1
  14  -7  -8-34.1872 75.5348   1
 -11   7  -8 323.290 120.590  -2
  14  -7  -8 323.290 120.590   1
  14  -7  -7 20.2085 56.6229   1
 -12   7  -6 473.342 82.9476  -2
  14  -7  -6 473.342 82.9476   1
  14  -7  -5 37.0911 52.1770   1
  14  -7  -4 524.909 59.9058   1
 -13   7  -3-26.1734 72.1126  -2
  14  -7  -3-26.1734 72.1126   1
  14  -7  -2 616.630 61.3576   1
  14  -7  -1-18.7297 52.9464   1
 -14   7   0 76.9670 64.9136  -2
  14  -7   0 76.9670 64.9136   1
  14  -7   1-3.35498 53.7909   1
  14  -7   2 36.7501 52.9924   1
 -15   7   3 16.2817 108.606  -2
  14  -7   3 16.2817 108.606   1
  14  -7   4 122.334 83.1669   1
  14  -8 -13 131.171 89.6923   1
 -10   8 -12 401.612 129.405  -2
  14  -8 -12 401.612 129.405   1
 -10   8 -11 313.278 89.5976  -2
  14  -8 -11 313.278 89.5976   1
  14  -8 -10 183.078 63.7007   1
 -11   8  -9 372.304 87.3905  -2
  14  -8  -9 372.304 87.3905   1
  14  -8  -8 165.351 85.7507   1
 -11   8  -8 253.095 121.694  -2
  14  -8  -8 253.095 121.694   1
  14  -8  -7 61.1705 59.8764   1
 -12   8  -6 492.726 87.4102  -2
  14  -8  -6 492.726 87.4102   1
  14  -8  -5 44.1812 56.0408   1
  14  -8  -4-29.7181 54.5595   1
 -13   8  -3-5.65860 73.9987  -2
  14  -8  -3-5.65860 73.9987   1
  14  -8  -2 237.402 59.5556   1
  14  -8  -1 176.980 57.5905   1
 -14   8   0 783.657 92.5632  -2
  14  -8   0 783.657 92.5632   1
  14  -8   1 607.252 65.3198   1
  14  -8   2 382.127 63.0868   1
 -10   9 -11 223.710 123.855  -2
  14  -9 -11 223.710 123.855   1
  14  -9 -10 5.95897 88.0803   1
 -11   9  -9-25.7501 114.352  -2
  14  -9  -9-25.7501 114.352   1
  14  -9  -8 62.0767 85.3719   1
 -11   9  -8 117.024 120.832  -2
  14  -9  -8 117.024 120.832   1
  14  -9  -7 75.1301 60.8076   1
 -12   9  -6 41.2358 81.9901  -2
  14  -9  -6 41.2358 81.9901   1
  14  -9  -5 392.583 64.5697   1
  14  -9  -4-0.26913 56.9200   1
 -13   9  -3 470.296 86.4895  -2
  14  -9  -3 470.296 86.4895   1
  14  -9  -2-13.4662 57.6446   1
  14  -9  -1 76.6162 58.2930   1
 -14   9   0 4.75090 109.084  -2
  14  -9   0 4.75090 109.084   1
  14  -9   1 2.06445 78.1079   1
  14  -9   2 65.0383 75.8260   1
  14 -10  -8 264.117 93.4728   1
  14 -10  -7-6.45775 85.0322   1
 -12  10  -6 588.170 126.373  -2
  14 -10  -6 588.170 126.373   1
  14 -10  -5 43.5834 81.7514   1
  14 -10  -4-64.0627 81.4201   1
 -13  10  -3 40.0135 113.961  -2
  14 -10  -3 40.0135 113.961   1
  14 -10  -2 78.7317 80.2821   1
  14 -10  -1 251.396 85.3898   1
 -14  10   0 522.967 97.8674  -2
  14 -10   0 522.967 97.8674   1
 -10   0 -14 644.537 133.242  -2
  15   0 -14 644.537 133.242   1
 -11   0 -12 574.629 121.114  -2
  15   0 -12 574.629 121.114   1
  15   0 -10-46.8311 81.5038   1
 -12   0  -8 366.439 110.312  -2
  15   0  -8 366.439 110.312   1
 -13   0  -6 1155.43 129.882  -2
  15   0  -6 1155.43 129.882   1
  15   0  -4 551.584 83.7895   1
  15   0  -2 9.10842 70.2082   1
 -15   0   0 42.0214 97.0144  -2
  15   0   0 42.0214 97.0144   1
  15   0   2 206.510 74.2419   1
  15   0   4 441.858 78.6745   1
 -17   0   6 685.461 113.226  -2
  15   0   6 685.461 113.226   1
  15   0   8 45.1585 70.3347   1
 -10   1 -14 331.931 127.076  -2
  15  -1 -14 331.931 127.076   1
  15   1 -13 251.958 63.6596   1
 -11  -1 -12 789.355 88.6856  -2
  15   1 -12 789.355 88.6856   1
 -11  -1 -11 530.129 81.7864  -2
  15   1 -11 530.129 81.7864   1
  15   1 -10 199.409 58.0303   1
 -12   1  -9 385.546 82.7321  -2
  15  -1  -9 385.546 82.7321   1
 -12  -1  -8 262.783 76.5282  -2
  15   1  -8 262.783 76.5282   1
  15   1  -7-6.52721 53.8177   1
 -13  -1  -6 196.522 74.2700  -2
  15   1  -6 196.522 74.2700   1
  15   1  -5 15.2994 51.6632   1
  15  -1  -4 156.545 52.9905   1
 -14   1  -3 320.365 75.4656  -2
  15  -1  -3 320.365 75.4656   1
  15   1  -2 481.335 56.1567   1
  15  -1  -1 720.015 58.4780   1
 -15  -1   0 1212.16 87.6262  -2
  15   1   0 1212.16 87.6262   1
  15   1   1 370.372 53.6141   1
  15   1   2 563.592 55.1649   1
 -16  -1   3 174.348 69.1065  -2
  15   1   3 174.348 69.1065   1
  15   1   4 123.356 49.2279   1
  15   1   5-0.16998 48.1573   1
 -17  -1   6 251.506 76.3682  -2
  15   1   6 251.506 76.3682   1
  15  -1   7-8.12077 67.4090   1
  15  -1   8-48.3203 74.5799   1
 -10   2 -14-25.9491 118.555  -2
  15  -2 -14-25.9491 118.555   1
  15  -2 -13 549.385 57.8983   1
  15  -2 -12-12.3680 60.6864   1
 -11  -2 -12 66.0095 81.6354  -2
  15   2 -12 66.0095 81.6354   1
 -11  -2 -11 294.927 58.1898  -2
  15   2 -11 294.927 58.1898   1
  15   2 -10 12.5025 39.2230   1
 -12  -2  -9 851.803 82.8886  -2
  15   2  -9 851.803 82.8886   1
  15  -2  -8 36.1876 51.0430   1
 -12  -2  -8 101.614 74.7502  -2
  15   2  -8 101.614 74.7502   1
  15   2  -7 570.717 62.1761   1
 -13  -2  -6 104.710 74.0463  -2
  15   2  -6 104.710 74.0463   1
  15   2  -5 759.739 62.1719   1
  15  -2  -4 9.54667 50.7122   1
 -14   2  -3 345.145 74.3726  -2
  15  -2  -3 345.145 74.3726   1
  15  -2  -2 47.1285 49.8647   1
  15  -2  -1-8.28026 47.6236   1
 -15  -2   0 41.5215 57.1782  -2
  15   2   0 41.5215 57.1782   1
  15   2   1 7.05045 47.1201   1
  15   2   2 33.0306 46.7727   1
 -16  -2   3 440.666 72.8363  -2
  15   2   3 440.666 72.8363   1
  15   2   4-11.5127 46.0947   1
  15  -2   5 520.422 87.4696   1
 -17   2   6 1.50493 87.5638  -2
  15  -2   6 1.50493 87.5638   1
  15  -2   7 275.043 81.7212   1
  15  -2   8 31.3822 74.8877   1
  -9   3 -17 19.8722 118.765  -2
  15  -3 -17 19.8722 118.765   1
  15  -3 -16 15.4810 84.5909   1
 -10   3 -15 32.3050 134.721  -2
  15  -3 -15 32.3050 134.721   1
 -10   3 -14 1105.95 88.9094  -2
  15  -3 -14 1105.95 88.9094   1
  15  -3 -13 84.2836 55.5978   1
 -11   3 -12 475.654 77.8342  -2
  15  -3 -12 475.654 77.8342   1
 -11  -3 -11 267.316 60.3555  -2
  15   3 -11 267.316 60.3555   1
  15   3 -10 358.542 45.6225   1
 -12  -3  -9 107.969 55.8440  -2
  15   3  -9 107.969 55.8440   1
 -12  -3  -8 734.970 58.3210  -2
  15   3  -8 734.970 58.3210   1
  15  -3  -7 21.0545 37.3646   1
 -13   3  -6 109.662 52.2525  -2
  15  -3  -6 109.662 52.2525   1
  15  -3  -5 58.0150 36.7369   1
  15  -3  -4 69.8510 35.9906   1
 -14   3  -3 429.864 54.3486  -2
  15  -3  -3 429.864 54.3486   1
  15  -3  -2 316.395 37.9594   1
  15  -3  -1 507.820 54.5003   1
 -15   3   0 1064.82 83.1174  -2
  15  -3   0 1064.82 83.1174   1
  15  -3   1 521.238 54.2678   1
  15  -3   2 576.284 54.8544   1
 -16   3   3 399.955 116.501  -2
  15  -3   3 399.955 116.501   1
  15  -3   4 65.8461 75.8728   1
  15  -3   5 182.139 79.0797   1
 -17   3   6 190.745 112.016  -2
  15  -3   6 190.745 112.016   1
  15  -3   7 2.33147 77.6060   1
  -9   4 -17 94.2048 122.487  -2
  15  -4 -17 94.2048 122.487   1
  15  -4 -16 176.078 89.0908   1
 -10   4 -15-53.7110 113.630  -2
  15  -4 -15-53.7110 113.630   1
 -10   4 -14 333.896 113.449  -2
  15  -4 -14 333.896 113.449   1
  15  -4 -13-11.2216 58.3540   1
 -11   4 -12 476.905 83.1146  -2
  15  -4 -12 476.905 83.1146   1
 -11   4 -11 82.3156 74.6335  -2
  15  -4 -11 82.3156 74.6335   1
  15  -4 -10 42.2214 53.0492   1
 -12  -4  -9 291.496 60.8549  -2
  15   4  -9 291.496 60.8549   1
  15  -4  -8 315.207 67.2005   1
 -12  -4  -8 601.388 80.4125  -2
  15   4  -8 601.388 80.4125   1
  15  -4  -7 361.904 42.8509   1
 -13   4  -6 1425.54 70.1561  -2
  15  -4  -6 1425.54 70.1561   1
  15  -4  -5 367.003 41.2803   1
  15  -4  -4 387.845 40.2323   1
 -14   4  -3 452.955 54.8842  -2
  15  -4  -3 452.955 54.8842   1
  15  -4  -2 119.850 35.4610   1
  15  -4  -1 50.3878 34.2952   1
 -15   4   0-7.18803 46.7388  -2
  15  -4   0-7.18803 46.7388   1
  15  -4   1 7.44396 44.8236   1
  15  -4   2 266.190 85.7932   1
 -16   4   3 247.740 112.576  -2
  15  -4   3 247.740 112.576   1
  15  -4   4 323.590 86.7151   1
  15  -4   5 101.147 78.0550   1
  15  -5 -16 102.447 90.9321   1
 -10   5 -15 363.421 125.806  -2
  15  -5 -15 363.421 125.806   1
 -10   5 -14 208.357 118.909  -2
  15  -5 -14 208.357 118.909   1
  15  -5 -13 414.901 90.0264   1
 -11   5 -12 99.7797 81.7942  -2
  15  -5 -12 99.7797 81.7942   1
 -11   5 -11 399.463 83.5771  -2
  15  -5 -11 399.463 83.5771   1
  15  -5 -10 21.7500 56.6233   1
 -12   5  -9 914.304 88.1016  -2
  15  -5  -9 914.304 88.1016   1
  15  -5  -8-8.31384 51.5659   1
  15  -5  -7 99.4321 41.2012   1
 -13   5  -6 140.616 54.8498  -2
  15  -5  -6 140.616 54.8498   1
  15  -5  -5 55.1659 37.3251   1
  15  -5  -4 399.690 40.9744   1
 -14   5  -3 322.163 53.1693  -2
  15  -5  -3 322.163 53.1693   1
  15  -5  -2 72.8261 47.3315   1
  15  -5  -1 182.284 49.5921   1
 -15   5   0 275.787 55.0369  -2
  15  -5   0 275.787 55.0369   1
  15  -5   1 227.987 50.8249   1
  15  -5   2 132.584 50.8772   1
 -16   5   3 176.092 111.046  -2
  15  -5   3 176.092 111.046   1
  15  -5   4-13.0962 79.8708   1
 -10   6 -15 235.642 129.297  -2
  15  -6 -15 235.642 129.297   1
 -10   6 -14 47.7792 121.180  -2
  15  -6 -14 47.7792 121.180   1
  15  -6 -13 88.8914 89.5732   1
 -11   6 -12 135.198 118.251  -2
  15  -6 -12 135.198 118.251   1
 -11   6 -11 162.566 85.9135  -2
  15  -6 -11 162.566 85.9135   1
  15  -6 -10 101.584 60.5184   1
 -12   6  -9 381.069 85.7221  -2
  15  -6  -9 381.069 85.7221   1
  15  -6  -8 255.237 79.4323   1
 -12   6  -8 520.640 124.694  -2
  15  -6  -8 520.640 124.694   1
  15  -6  -7 364.063 60.7556   1
 -13   6  -6 521.576 83.2740  -2
  15  -6  -6 521.576 83.2740   1
  15  -6  -5 405.423 58.9723   1
  15  -6  -4 185.794 54.8661   1
 -14   6  -3 551.422 81.1019  -2
  15  -6  -3 551.422 81.1019   1
  15  -6  -2 94.9450 50.3414   1
  15  -6  -1 46.4088 49.8899   1
 -15   6   0 8.72392 58.7948  -2
  15  -6   0 8.72392 58.7948   1
  15  -6   1-32.4395 52.1391   1
  15  -6   2 33.1192 52.2968   1
 -10   7 -14 565.085 136.501  -2
  15  -7 -14 565.085 136.501   1
  15  -7 -13-21.1527 89.2303   1
 -11   7 -12 559.329 137.267  -2
  15  -7 -12 559.329 137.267   1
 -11   7 -11 106.665 119.269  -2
  15  -7 -11 106.665 119.269   1
  15  -7 -10 414.753 94.6549   1
 -12   7  -9-26.1553 113.123  -2
  15  -7  -9-26.1553 113.123   1
  15  -7  -8 344.282 87.8187   1
 -12   7  -8 864.408 133.611  -2
  15  -7  -8 864.408 133.611   1
  15  -7  -7 47.3855 58.9032   1
 -13   7  -6 144.556 81.6235  -2
  15  -7  -6 144.556 81.6235   1
  15  -7  -5 21.8748 55.5570   1
  15  -7  -4 87.5964 56.5101   1
 -14   7  -3 19.0224 73.2370  -2
  15  -7  -3 19.0224 73.2370   1
  15  -7  -2 258.518 57.3782   1
  15  -7  -1 20.7691 55.6066   1
 -15   7   0 564.301 87.8983  -2
  15  -7   0 564.301 87.8983   1
  15  -7   1 9.13605 72.3455   1
  15  -7   2 143.745 77.1984   1
 -16   7   3 6.78545 102.572  -2
  15  -7   3 6.78545 102.572   1
 -11   8 -11 273.673 124.785  -2
  15  -8 -11 273.673 124.785   1
  15  -8 -10 111.928 87.5264   1
 -12   8  -9 553.360 131.758  -2
  15  -8  -9 553.360 131.758   1
  15  -8  -8 398.007 93.9258   1
  15  -8  -7 283.998 89.6833   1
 -13   8  -6 401.990 118.807  -2
  15  -8  -6 401.990 118.807   1
  15  -8  -5 367.284 86.5241   1
  15  -8  -4 413.351 87.4961   1
 -14   8  -3 477.953 119.546  -2
  15  -8  -3 477.953 119.546   1
  15  -8  -2 121.818 77.3921   1
  15  -8  -1 18.1287 75.4382   1
 -15   8   0 56.9349 80.1357  -2
  15  -8   0 56.9349 80.1357   1
  15  -8   1-22.1886 79.4048   1
  15  -8   2 57.8747 78.7603   1
 -16   8   3 481.648 123.005  -2
  15  -8   3 481.648 123.005   1
 -12   9  -9 798.605 142.908  -2
  15  -9  -9 798.605 142.908   1
  15  -9  -8 18.1994 88.4005   1
  15  -9  -7 236.104 91.9225   1
 -13   9  -6-37.3631 115.823  -2
  15  -9  -6-37.3631 115.823   1
  15  -9  -5 12.8843 83.4722   1
  15  -9  -4 37.4656 83.6504   1
 -14   9  -3 134.292 114.734  -2
  15  -9  -3 134.292 114.734   1
  15  -9  -2-24.6153 81.6956   1
  15  -9  -1 156.015 86.2463   1
 -15   9   0 38.0848 85.4647  -2
  15  -9   0 38.0848 85.4647   1
  15  -9   1 176.429 83.8978   1
 -12   0 -12 812.973 128.715  -2
  16   0 -12 812.973 128.715   1
  16   0 -10 322.954 91.0398   1
 -13   0  -8 914.642 127.627  -2
  16   0  -8 914.642 127.627   1
 -14   0  -6-35.8736 115.298  -2
  16   0  -6-35.8736 115.298   1
  16   0  -4 300.177 83.4049   1
  16   0  -2 432.983 84.4689   1
 -16   0   0 921.888 127.934  -2
  16   0   0 921.888 127.934   1
  16   0   2-5.15258 73.8485   1
  16   0   4 19.9069 77.5875   1
 -18   0   6 256.731 114.232  -2
  16   0   6 256.731 114.232   1
  16   1 -13 98.7013 65.3367   1
 -12  -1 -12 1121.45 94.9115  -2
  16   1 -12 1121.45 94.9115   1
 -12  -1 -11 517.012 86.3156  -2
  16   1 -11 517.012 86.3156   1
  16   1 -10 702.822 69.9390   1
 -13  -1  -9 242.932 85.0287  -2
  16   1  -9 242.932 85.0287   1
 -13  -1  -8 477.335 83.7893  -2
  16   1  -8 477.335 83.7893   1
  16   1  -7 408.587 63.0845   1
 -14  -1  -6 691.182 89.4124  -2
  16   1  -6 691.182 89.4124   1
  16   1  -5 215.864 58.3478   1
  16   1  -4 175.681 55.8887   1
 -15   1  -3 217.403 78.2661  -2
  16  -1  -3 217.403 78.2661   1
  16  -1  -2 41.1753 54.3974   1
  16   1  -1 7.33964 51.2919   1
 -16  -1   0-26.8558 73.3287  -2
  16   1   0-26.8558 73.3287   1
  16   1   1 213.617 55.5516   1
  16   1   2 104.135 53.7114   1
 -17  -1   3 700.538 85.7395  -2
  16   1   3 700.538 85.7395   1
  16   1   4 94.9464 52.7650   1
  16  -1   5 345.205 84.8566   1
 -18   1   6 141.322 110.044  -2
  16  -1   6 141.322 110.044   1
 -12  -2 -12-54.7257 86.8875  -2
  16   2 -12-54.7257 86.8875   1
 -12  -2 -11 741.019 92.9305  -2
  16   2 -11 741.019 92.9305   1
  16   2 -10 12.0036 58.3348   1
 -13  -2  -9 1574.60 101.276  -2
  16   2  -9 1574.60 101.276   1
 -13  -2  -8 45.3087 78.0988  -2
  16   2  -8 45.3087 78.0988   1
  16   2  -7-6.09438 55.9330   1
 -14  -2  -6-0.69208 76.5567  -2
  16   2  -6-0.69208 76.5567   1
  16   2  -5 51.5776 56.3516   1
  16  -2  -4 72.7758 67.6287   1
 -15   2  -3 364.091 80.6629  -2
  16  -2  -3 364.091 80.6629   1
  16  -2  -2 31.6287 52.4258   1
  16  -2  -1 393.809 57.6810   1
 -16  -2   0 225.850 73.8500  -2
  16   2   0 225.850 73.8500   1
  16   2   1 68.6756 51.1712   1
  16   2   2-2.31796 50.5336   1
 -17   2   3-67.9149 106.888  -2
  16  -2   3-67.9149 106.888   1
  16  -2   4-69.4710 81.2209   1
  16  -2   5-28.0788 78.5638   1
 -12  -3 -11 296.536 86.4557  -2
  16   3 -11 296.536 86.4557   1
  16   3 -10 268.357 64.9529   1
 -13  -3  -9 329.962 85.0043  -2
  16   3  -9 329.962 85.0043   1
 -13  -3  -8 965.081 86.3637  -2
  16   3  -8 965.081 86.3637   1
  16   3  -7 273.821 58.5964   1
 -14  -3  -6 825.125 88.9159  -2
  16   3  -6 825.125 88.9159   1
  16  -3  -5 271.523 58.7651   1
  16  -3  -4 159.703 54.5725   1
 -15   3  -3 347.410 76.8090  -2
  16  -3  -3 347.410 76.8090   1
  16  -3  -2-12.3543 52.4510   1
  16  -3  -1 19.2387 49.9346   1
 -16   3   0 271.191 88.2484  -2
  16  -3   0 271.191 88.2484   1
  16  -3   1 81.0763 81.7723   1
  16  -3   2 496.071 89.5479   1
 -17   3   3 255.464 120.349  -2
  16  -3   3 255.464 120.349   1
[truncated: 136,157 more chars]
