# Supplementary material
Source: MDPI journal article supplement (https://www.mdpi.com/2304-6740/10/4/41)
Supplement: s1 [file s1 › 3HoCr.cif]

 
data_3HoCr
 
_audit_creation_method            'SHELXL-2016/6'
_shelx_SHELXL_version_number      '2016/6'
_chemical_name_systematic         ?
_chemical_name_common             ?
_chemical_melting_point           ?
_chemical_formula_moiety 
 'C17 H19 Cr Ho N13 O4, 3(H2 O)' 
_chemical_formula_sum
 'C17 H25 Cr Ho N13 O7' 
_chemical_formula_weight          740.43

loop_
 _atom_type_symbol
 _atom_type_description
 _atom_type_scat_dispersion_real
 _atom_type_scat_dispersion_imag
 _atom_type_scat_source
 'C'  'C'   0.0033   0.0016
 'International Tables Vol C Tables 4.2.6.8 and 6.1.1.4'
 'Cr'  'Cr'   0.3209   0.6236
 'International Tables Vol C Tables 4.2.6.8 and 6.1.1.4'
 'H'  'H'   0.0000   0.0000
 'International Tables Vol C Tables 4.2.6.8 and 6.1.1.4'
 'Ho'  'Ho'  -0.2175   4.6783
 'International Tables Vol C Tables 4.2.6.8 and 6.1.1.4'
 'N'  'N'   0.0061   0.0033
 'International Tables Vol C Tables 4.2.6.8 and 6.1.1.4'
 'O'  'O'   0.0106   0.0060
 'International Tables Vol C Tables 4.2.6.8 and 6.1.1.4'
 
_space_group_crystal_system       monoclinic
_space_group_IT_number            14
_space_group_name_H-M_alt         'P 21/c'
_space_group_name_Hall            '-P 2ybc'
 
_shelx_space_group_comment
;
The symmetry employed for this shelxl refinement is uniquely defined
by the following loop, which should always be used as a source of
symmetry information in preference to the above space-group names.
They are only intended as comments.
;
 
loop_
 _space_group_symop_operation_xyz
 'x, y, z'
 '-x, y+1/2, -z+1/2'
 '-x, -y, -z'
 'x, -y-1/2, z-1/2'
 
_cell_length_a                    12.8518(7)
_cell_length_b                    12.8157(7)
_cell_length_c                    17.2114(10)
_cell_angle_alpha                 90
_cell_angle_beta                  103.557(6)
_cell_angle_gamma                 90
_cell_volume                      2755.8(3)
_cell_formula_units_Z             4
_cell_measurement_temperature     150(1)
_cell_measurement_reflns_used     15199
_cell_measurement_theta_min       1.4860
_cell_measurement_theta_max       32.6780
 
_exptl_crystal_description        plate
_exptl_crystal_colour             yellow
_exptl_crystal_density_meas       ?
_exptl_crystal_density_method     ?
_exptl_crystal_density_diffrn     1.785          
_exptl_crystal_F_000              1460
_exptl_transmission_factor_min    ?
_exptl_transmission_factor_max    ?
_exptl_crystal_size_max           0.321
_exptl_crystal_size_mid           0.165
_exptl_crystal_size_min           0.035
_exptl_absorpt_coefficient_mu     3.306
_shelx_estimated_absorpt_T_min    0.417
_shelx_estimated_absorpt_T_max    0.893
_exptl_absorpt_correction_T_min   0.56854
_exptl_absorpt_correction_T_max   1.00000
_exptl_absorpt_correction_type    'multi-scan'
_exptl_absorpt_process_details
;
CrysAlisPro, Agilent Technologies,
Version 1.171.37.34c (release 10-06-2014 CrysAlis171 .NET)
(compiled Jun 10 2014,17:39:53)
Empirical absorption correction using spherical harmonics,
 implemented in SCALE3 ABSPACK scaling algorithm.
;
_diffrn_ambient_temperature       150(1)
_diffrn_ambient_environment       'N~2~'
_diffrn_source                    'fine-focus sealed X-ray tube'
_diffrn_source_type               'Enhance (Mo) X-ray Source'
_diffrn_radiation_probe           x-ray
_diffrn_radiation_type            'Mo K\a'
_diffrn_radiation_wavelength      0.71073
_diffrn_radiation_monochromator   graphite
_diffrn_measurement_device        'four-circle diffractometer'
_diffrn_measurement_device_type   'Xcalibur, Ruby, Gemini'
_diffrn_detector                  'CCD plate'
_diffrn_detector_type             'Ruby'
_diffrn_detector_area_resol_mean  10.4752
_diffrn_reflns_number             22589
_diffrn_reflns_av_unetI/netI      0.0340
_diffrn_reflns_av_R_equivalents   0.0306
_diffrn_reflns_limit_h_min        -19
_diffrn_reflns_limit_h_max        18
_diffrn_reflns_limit_k_min        -19
_diffrn_reflns_limit_k_max        19
_diffrn_reflns_limit_l_min        -26
_diffrn_reflns_limit_l_max        23
_diffrn_reflns_theta_min          1.630
_diffrn_reflns_theta_max          32.863
_diffrn_reflns_theta_full         31.000
_diffrn_measured_fraction_theta_max   0.897
_diffrn_measured_fraction_theta_full  0.991
_diffrn_reflns_Laue_measured_fraction_max    0.897
_diffrn_reflns_Laue_measured_fraction_full   0.991
_diffrn_reflns_point_group_measured_fraction_max   0.897
_diffrn_reflns_point_group_measured_fraction_full  0.991
_reflns_number_total              9216
_reflns_number_gt                 8479
_reflns_threshold_expression      'I > 2\s(I)'
_reflns_Friedel_coverage          0.000
_reflns_Friedel_fraction_max      .
_reflns_Friedel_fraction_full     .
 
_reflns_special_details
;
 Reflections were merged by SHELXL according to the crystal
 class for the calculation of statistics and refinement.
 
 _reflns_Friedel_fraction is defined as the number of unique
 Friedel pairs measured divided by the number that would be
 possible theoretically, ignoring centric projections and
 systematic absences.
;
 
_computing_data_collection       'CrysAlisPro 1.171.37.34 (Rigaku OD, 2015)'
_computing_cell_refinement       'CrysAlisPro 1.171.37.34 (Rigaku OD, 2015)'
_computing_data_reduction        'CrysAlisPro 1.171.37.34 (Rigaku OD, 2015)'
_computing_structure_solution    'SHELXS-97 (Sheldrick, 2008)'
_computing_structure_refinement  'SHELXL-2016/6 (Sheldrick, 2016)'
_computing_molecular_graphics    'DIAMOND 3.1 (Crystal Impact GbR 2005)'
_computing_publication_material  'WinGX publication routines (Farrugia, 1999)'

_refine_ls_structure_factor_coef  Fsqd
_refine_ls_matrix_type            full
_refine_ls_weighting_scheme       calc
_refine_ls_weighting_details
'w=1/[\s^2^(Fo^2^)+(0.0271P)^2^+1.5615P] where P=(Fo^2^+2Fc^2^)/3'
_atom_sites_solution_primary      direct
_atom_sites_solution_secondary    difmap
_atom_sites_solution_hydrogens    mixed
_refine_ls_hydrogen_treatment     mixed
_refine_ls_extinction_method      none
_refine_ls_extinction_coef        .
_refine_ls_number_reflns          9216
_refine_ls_number_parameters      402
_refine_ls_number_restraints      45
_refine_ls_R_factor_all           0.0265
_refine_ls_R_factor_gt            0.0233
_refine_ls_wR_factor_ref          0.0575
_refine_ls_wR_factor_gt           0.0557
_refine_ls_goodness_of_fit_ref    1.008
_refine_ls_restrained_S_all       1.006
_refine_ls_shift/su_max           0.008
_refine_ls_shift/su_mean          0.000
 
loop_
 _atom_site_label
 _atom_site_type_symbol
 _atom_site_fract_x
 _atom_site_fract_y
 _atom_site_fract_z
 _atom_site_U_iso_or_equiv
 _atom_site_adp_type
 _atom_site_occupancy
 _atom_site_site_symmetry_order  
 _atom_site_calc_flag
 _atom_site_refinement_flags_posn
 _atom_site_refinement_flags_adp
 _atom_site_refinement_flags_occupancy
 _atom_site_disorder_assembly
 _atom_site_disorder_group
Ho1 Ho 0.68528(2) 0.61057(2) 0.20634(2) 0.00558(3) Uani 1 1 d . . . . .
N5 N 0.85895(12) 0.51667(11) 0.26291(9) 0.0084(3) Uani 1 1 d . . . . .
N6 N 0.63364(12) 0.75964(11) 0.28931(9) 0.0089(3) Uani 1 1 d . . . . .
N7 N 0.75195(13) 0.60490(11) 0.35554(9) 0.0095(3) Uani 1 1 d . . . . .
O1 O 0.78107(10) 0.55815(11) 0.11403(8) 0.0126(3) Uani 1 1 d . . . . .
O2 O 0.60038(11) 0.75609(10) 0.13478(8) 0.0113(2) Uani 1 1 d . . . . .
O3 O 0.82621(11) 0.73083(11) 0.22030(10) 0.0155(3) Uani 1 1 d D . . . .
H3WA H 0.823(2) 0.7931(12) 0.2227(16) 0.023 Uiso 1 1 d D U . . .
H3WB H 0.8857(14) 0.721(2) 0.2446(15) 0.023 Uiso 1 1 d D U . . .
O4 O 0.57025(11) 0.54562(11) 0.08924(8) 0.0134(3) Uani 1 1 d D . . . .
H4WA H 0.5146(15) 0.569(2) 0.0676(15) 0.020 Uiso 1 1 d D U . . .
H4WB H 0.590(2) 0.5011(16) 0.0640(14) 0.020 Uiso 1 1 d D U . . .
C1 C 0.87194(15) 0.51722(15) 0.13115(11) 0.0119(3) Uani 1 1 d . . . . .
C2 C 0.55922(15) 0.82991(14) 0.16488(11) 0.0110(3) Uani 1 1 d . . . . .
C3 C 0.97804(17) 0.41229(17) 0.36705(13) 0.0176(4) Uani 1 1 d . . . . .
H3A H 0.962652 0.343339 0.342409 0.026 Uiso 1 1 calc R U . . .
H3B H 0.988991 0.405978 0.425151 0.026 Uiso 1 1 calc R U . . .
H3C H 1.042856 0.440659 0.354269 0.026 Uiso 1 1 calc R U . . .
C4 C 0.88609(14) 0.48369(14) 0.33555(11) 0.0101(3) Uani 1 1 d . . . . .
C5 C 0.81859(14) 0.52643(14) 0.38764(10) 0.0099(3) Uani 1 1 d . . . . .
C6 C 0.82493(16) 0.49137(16) 0.46549(11) 0.0152(4) Uani 1 1 d . . . . .
H6 H 0.868215 0.433058 0.486266 0.018 Uiso 1 1 calc R U . . .
C7 C 0.76631(17) 0.54388(17) 0.51199(12) 0.0178(4) Uani 1 1 d . . . . .
H7 H 0.766310 0.519075 0.564001 0.021 Uiso 1 1 calc R U . . .
C8 C 0.70783(17) 0.63251(17) 0.48241(12) 0.0163(4) Uani 1 1 d . . . . .
H8 H 0.672631 0.672536 0.515048 0.020 Uiso 1 1 calc R U . . .
C9 C 0.70250(14) 0.66086(15) 0.40299(10) 0.0106(3) Uani 1 1 d . . . . .
C10 C 0.64389(14) 0.75511(14) 0.36550(11) 0.0106(3) Uani 1 1 d . . . . .
C11 C 0.60282(17) 0.83424(17) 0.41503(12) 0.0178(4) Uani 1 1 d . . . . .
H11A H 0.602637 0.903342 0.390605 0.027 Uiso 1 1 calc R U . . .
H11B H 0.649166 0.835390 0.469067 0.027 Uiso 1 1 calc R U . . .
H11C H 0.529785 0.815761 0.417804 0.027 Uiso 1 1 calc R U . . .
N1 N 0.92787(16) 0.49912(17) 0.07658(12) 0.0234(4) Uani 1 1 d . . . . .
H1A H 0.904(2) 0.520(2) 0.0300(18) 0.028 Uiso 1 1 d . U . . .
H1B H 0.990(2) 0.473(2) 0.0891(17) 0.028 Uiso 1 1 d . U . . .
N2 N 0.49774(17) 0.90230(14) 0.12117(12) 0.0195(4) Uani 1 1 d . . . . .
H2A H 0.476(2) 0.893(2) 0.0740(19) 0.023 Uiso 1 1 d . U . . .
H2B H 0.475(2) 0.950(2) 0.1431(16) 0.023 Uiso 1 1 d . U . . .
N3 N 0.91640(13) 0.48811(13) 0.20852(10) 0.0118(3) Uani 1 1 d . . . . .
H3 H 0.972(2) 0.4521(19) 0.2216(14) 0.014 Uiso 1 1 d . U . . .
N4 N 0.57740(13) 0.83988(12) 0.24647(9) 0.0107(3) Uani 1 1 d . . . . .
H4 H 0.543(2) 0.8832(17) 0.2687(16) 0.013 Uiso 1 1 d . U . . .
Cr1 Cr 0.72110(2) 0.17332(2) 0.23573(2) 0.00695(5) Uani 1 1 d . . . . .
C12 C 0.67677(14) 0.33029(14) 0.23274(11) 0.0105(3) Uani 1 1 d . . . . .
C13 C 0.42203(15) 0.61954(13) 0.24280(11) 0.0103(3) Uani 1 1 d . . . . .
C14 C 0.77745(15) 0.02227(15) 0.23882(11) 0.0128(3) Uani 1 1 d . . . . .
C15 C 0.86798(15) 0.21216(15) 0.21290(12) 0.0134(3) Uani 1 1 d . . . . .
C16 C 0.64842(16) 0.16169(15) 0.11490(12) 0.0143(3) Uani 1 1 d . . . . .
C17 C 0.78474(16) 0.18347(16) 0.35783(12) 0.0154(4) Uani 1 1 d . . . . .
N12 N 0.66045(13) 0.41914(13) 0.23044(10) 0.0132(3) Uani 1 1 d . . . . .
N13 N 0.50432(13) 0.59106(12) 0.23512(10) 0.0123(3) Uani 1 1 d . . . . .
N14 N 0.81671(17) -0.05886(14) 0.24252(13) 0.0242(4) Uani 1 1 d . . . . .
N15 N 0.95214(14) 0.22558(16) 0.20287(12) 0.0239(4) Uani 1 1 d . . . . .
N16 N 0.60198(17) 0.15711(16) 0.04869(11) 0.0244(4) Uani 1 1 d . . . . .
N17 N 0.81883(17) 0.18790(18) 0.42587(11) 0.0289(4) Uani 1 1 d . . . . .
O5 O 0.37419(13) 0.62009(12) 0.00613(10) 0.0196(3) Uani 1 1 d D . . . .
H5WA H 0.384(2) 0.6784(14) -0.0068(17) 0.029 Uiso 1 1 d D U . . .
H5WB H 0.3201(17) 0.623(2) 0.0202(18) 0.029 Uiso 1 1 d D U . . .
O6 O 1.13309(16) 0.39286(14) 0.07822(11) 0.0289(4) Uani 1 1 d D . . . .
H6WA H 1.109(3) 0.3350(15) 0.072(2) 0.043 Uiso 1 1 d D U . . .
H6WB H 1.159(3) 0.402(2) 0.1244(11) 0.043 Uiso 1 1 d D U . . .
O7 O 0.99642(16) 0.27694(15) 0.54400(10) 0.0307(4) Uani 1 1 d D . . . .
H7WA H 0.9445(19) 0.249(2) 0.5157(17) 0.046 Uiso 1 1 d D U . . .
H7WB H 0.979(3) 0.281(3) 0.5858(13) 0.046 Uiso 1 1 d D U . . .
 
loop_
 _atom_site_aniso_label
 _atom_site_aniso_U_11
 _atom_site_aniso_U_22
 _atom_site_aniso_U_33
 _atom_site_aniso_U_23
 _atom_site_aniso_U_13
 _atom_site_aniso_U_12
Ho1 0.00500(4) 0.00547(4) 0.00621(4) -0.00073(2) 0.00117(3) 0.00040(2)
N5 0.0077(6) 0.0090(6) 0.0094(6) -0.0012(5) 0.0036(5) -0.0005(5)
N6 0.0072(6) 0.0083(6) 0.0109(7) -0.0014(5) 0.0013(5) 0.0007(5)
N7 0.0086(7) 0.0115(7) 0.0078(7) -0.0015(5) 0.0006(5) 0.0011(5)
O1 0.0094(6) 0.0188(6) 0.0101(6) -0.0005(5) 0.0033(5) 0.0039(5)
O2 0.0150(6) 0.0088(5) 0.0104(6) 0.0002(5) 0.0034(5) 0.0042(5)
O3 0.0082(6) 0.0079(6) 0.0294(8) -0.0016(6) 0.0022(5) -0.0020(5)
O4 0.0107(6) 0.0162(6) 0.0111(6) -0.0058(5) -0.0020(5) 0.0027(5)
C1 0.0111(8) 0.0135(8) 0.0123(8) -0.0013(7) 0.0051(6) 0.0009(7)
C2 0.0103(7) 0.0103(7) 0.0124(8) -0.0006(6) 0.0024(6) -0.0004(6)
C3 0.0141(9) 0.0214(9) 0.0157(9) 0.0018(8) 0.0003(7) 0.0085(8)
C4 0.0077(7) 0.0104(7) 0.0114(8) -0.0012(6) 0.0008(6) -0.0009(6)
C5 0.0089(7) 0.0120(7) 0.0081(7) -0.0006(6) 0.0006(6) -0.0005(6)
C6 0.0167(9) 0.0169(9) 0.0107(8) 0.0029(7) 0.0006(7) 0.0018(7)
C7 0.0207(9) 0.0231(10) 0.0096(8) 0.0037(7) 0.0034(7) -0.0003(8)
C8 0.0154(9) 0.0240(9) 0.0099(8) -0.0031(7) 0.0039(7) -0.0001(8)
C9 0.0096(7) 0.0138(8) 0.0085(7) -0.0027(6) 0.0021(6) 0.0000(7)
C10 0.0079(7) 0.0125(8) 0.0106(8) -0.0042(6) 0.0009(6) 0.0007(6)
C11 0.0181(9) 0.0205(9) 0.0151(9) -0.0077(8) 0.0042(7) 0.0050(8)
N1 0.0186(9) 0.0392(11) 0.0147(8) 0.0029(8) 0.0086(7) 0.0145(8)
N2 0.0271(10) 0.0155(8) 0.0132(8) -0.0016(7) -0.0009(7) 0.0135(7)
N3 0.0089(7) 0.0149(7) 0.0127(7) 0.0007(6) 0.0045(6) 0.0062(6)
N4 0.0112(7) 0.0085(6) 0.0119(7) -0.0012(6) 0.0017(5) 0.0042(6)
Cr1 0.00555(11) 0.00584(11) 0.00944(12) 0.00065(10) 0.00171(9) 0.00013(10)
C12 0.0073(7) 0.0112(7) 0.0129(8) -0.0001(7) 0.0023(6) -0.0004(6)
C13 0.0097(8) 0.0084(7) 0.0127(8) -0.0006(6) 0.0022(6) -0.0029(6)
C14 0.0112(8) 0.0126(8) 0.0152(8) 0.0002(7) 0.0043(7) -0.0011(7)
C15 0.0123(8) 0.0131(8) 0.0147(8) 0.0014(7) 0.0028(7) 0.0011(7)
C16 0.0146(8) 0.0125(8) 0.0157(9) 0.0009(7) 0.0035(7) 0.0029(7)
C17 0.0133(8) 0.0161(9) 0.0168(9) 0.0009(7) 0.0040(7) 0.0001(7)
N12 0.0092(7) 0.0116(7) 0.0179(8) -0.0005(6) 0.0017(6) -0.0003(6)
N13 0.0112(7) 0.0107(6) 0.0157(8) -0.0025(6) 0.0048(6) -0.0014(6)
N14 0.0288(10) 0.0133(8) 0.0328(11) 0.0009(8) 0.0120(8) 0.0037(8)
N15 0.0131(8) 0.0316(10) 0.0280(10) 0.0022(8) 0.0072(7) -0.0013(8)
N16 0.0278(10) 0.0264(10) 0.0162(8) -0.0012(8) -0.0002(7) 0.0067(8)
N17 0.0293(10) 0.0404(12) 0.0146(9) 0.0001(8) 0.0005(8) 0.0019(9)
O5 0.0174(7) 0.0198(7) 0.0216(8) -0.0001(6) 0.0044(6) 0.0047(6)
O6 0.0261(9) 0.0361(10) 0.0220(9) -0.0005(8) 0.0005(7) 0.0036(8)
O7 0.0381(10) 0.0345(10) 0.0174(8) 0.0021(7) 0.0022(7) -0.0063(8)
 
_geom_special_details
;
 All esds (except the esd in the dihedral angle between two l.s. planes)
 are estimated using the full covariance matrix.  The cell esds are taken
 into account individually in the estimation of esds in distances, angles
 and torsion angles; correlations between esds in cell parameters are only
 used when they are defined by crystal symmetry.  An approximate (isotropic)
 treatment of cell esds is used for estimating esds involving l.s. planes.
;
 
loop_
 _geom_bond_atom_site_label_1
 _geom_bond_atom_site_label_2
 _geom_bond_distance
 _geom_bond_site_symmetry_2
 _geom_bond_publ_flag
Ho1 O1 2.3256(13) . ?
Ho1 O3 2.3472(14) . ?
Ho1 O4 2.3545(13) . ?
Ho1 O2 2.3570(13) . ?
Ho1 N13 2.5014(17) . ?
Ho1 N7 2.5103(16) . ?
Ho1 N12 2.5208(17) . ?
Ho1 N5 2.5217(15) . ?
Ho1 N6 2.5639(15) . ?
N5 C4 1.288(2) . ?
N5 N3 1.371(2) . ?
N6 C10 1.288(2) . ?
N6 N4 1.369(2) . ?
N7 C5 1.352(2) . ?
N7 C9 1.352(2) . ?
O1 C1 1.251(2) . ?
O2 C2 1.254(2) . ?
O3 H3WA 0.801(15) . ?
O3 H3WB 0.792(15) . ?
O4 H4WA 0.783(15) . ?
O4 H4WB 0.793(15) . ?
C1 N1 1.330(2) . ?
C1 N3 1.372(2) . ?
C2 N2 1.331(3) . ?
C2 N4 1.374(2) . ?
C3 C4 1.492(3) . ?
C3 H3A 0.9800 . ?
C3 H3B 0.9800 . ?
C3 H3C 0.9800 . ?
C4 C5 1.490(2) . ?
C5 C6 1.397(3) . ?
C6 C7 1.394(3) . ?
C6 H6 0.9500 . ?
C7 C8 1.391(3) . ?
C7 H7 0.9500 . ?
C8 C9 1.400(3) . ?
C8 H8 0.9500 . ?
C9 C10 1.488(3) . ?
C10 C11 1.498(3) . ?
C11 H11A 0.9800 . ?
C11 H11B 0.9800 . ?
C11 H11C 0.9800 . ?
N1 H1A 0.83(3) . ?
N1 H1B 0.85(3) . ?
N2 H2A 0.80(3) . ?
N2 H2B 0.81(3) . ?
N3 H3 0.84(2) . ?
N4 H4 0.86(3) . ?
Cr1 C14 2.0631(19) . ?
Cr1 C17 2.073(2) . ?
Cr1 C16 2.076(2) . ?
Cr1 C15 2.077(2) . ?
Cr1 C13 2.0770(19) 2_645 ?
Cr1 C12 2.0881(18) . ?
C12 N12 1.157(2) . ?
C13 N13 1.155(3) . ?
C14 N14 1.151(3) . ?
C15 N15 1.148(3) . ?
C16 N16 1.157(3) . ?
C17 N17 1.152(3) . ?
O5 H5WA 0.797(15) . ?
O5 H5WB 0.788(16) . ?
O6 H6WA 0.803(16) . ?
O6 H6WB 0.796(16) . ?
O7 H7WA 0.809(16) . ?
O7 H7WB 0.803(15) . ?
 
loop_
 _geom_angle_atom_site_label_1
 _geom_angle_atom_site_label_2
 _geom_angle_atom_site_label_3
 _geom_angle
 _geom_angle_site_symmetry_1
 _geom_angle_site_symmetry_3
 _geom_angle_publ_flag
O1 Ho1 O3 74.95(5) . . ?
O1 Ho1 O4 68.88(5) . . ?
O3 Ho1 O4 129.37(5) . . ?
O1 Ho1 O2 97.23(5) . . ?
O3 Ho1 O2 77.62(5) . . ?
O4 Ho1 O2 73.23(5) . . ?
O1 Ho1 N13 140.54(5) . . ?
O3 Ho1 N13 140.92(5) . . ?
O4 Ho1 N13 73.01(5) . . ?
O2 Ho1 N13 81.06(5) . . ?
O1 Ho1 N7 125.60(5) . . ?
O3 Ho1 N7 81.03(5) . . ?
O4 Ho1 N7 149.39(5) . . ?
O2 Ho1 N7 124.24(5) . . ?
N13 Ho1 N7 84.54(5) . . ?
O1 Ho1 N12 86.50(5) . . ?
O3 Ho1 N12 138.30(5) . . ?
O4 Ho1 N12 73.65(5) . . ?
O2 Ho1 N12 142.66(5) . . ?
N13 Ho1 N12 73.18(5) . . ?
N7 Ho1 N12 80.18(5) . . ?
O1 Ho1 N5 64.12(5) . . ?
O3 Ho1 N5 71.45(5) . . ?
O4 Ho1 N5 118.89(5) . . ?
O2 Ho1 N5 147.01(5) . . ?
N13 Ho1 N5 130.98(5) . . ?
N7 Ho1 N5 62.11(5) . . ?
N12 Ho1 N5 66.85(5) . . ?
O1 Ho1 N6 147.50(5) . . ?
O3 Ho1 N6 75.40(5) . . ?
O4 Ho1 N6 123.20(5) . . ?
O2 Ho1 N6 63.44(5) . . ?
N13 Ho1 N6 65.80(5) . . ?
N7 Ho1 N6 61.49(5) . . ?
N12 Ho1 N6 125.05(5) . . ?
N5 Ho1 N6 117.50(5) . . ?
C4 N5 N3 120.57(15) . . ?
C4 N5 Ho1 123.03(12) . . ?
N3 N5 Ho1 115.69(11) . . ?
C10 N6 N4 119.82(15) . . ?
C10 N6 Ho1 123.73(12) . . ?
N4 N6 Ho1 115.64(11) . . ?
C5 N7 C9 119.34(16) . . ?
C5 N7 Ho1 118.11(12) . . ?
C9 N7 Ho1 120.43(12) . . ?
C1 O1 Ho1 125.08(12) . . ?
C2 O2 Ho1 124.72(12) . . ?
Ho1 O3 H3WA 128(2) . . ?
Ho1 O3 H3WB 125(2) . . ?
H3WA O3 H3WB 101(3) . . ?
Ho1 O4 H4WA 126(2) . . ?
Ho1 O4 H4WB 120.5(19) . . ?
H4WA O4 H4WB 113(3) . . ?
O1 C1 N1 122.42(18) . . ?
O1 C1 N3 119.74(16) . . ?
N1 C1 N3 117.83(17) . . ?
O2 C2 N2 122.98(18) . . ?
O2 C2 N4 120.35(17) . . ?
N2 C2 N4 116.67(17) . . ?
C4 C3 H3A 109.5 . . ?
C4 C3 H3B 109.5 . . ?
H3A C3 H3B 109.5 . . ?
C4 C3 H3C 109.5 . . ?
H3A C3 H3C 109.5 . . ?
H3B C3 H3C 109.5 . . ?
N5 C4 C5 113.58(15) . . ?
N5 C4 C3 124.40(17) . . ?
C5 C4 C3 122.00(16) . . ?
N7 C5 C6 121.33(17) . . ?
N7 C5 C4 115.46(16) . . ?
C6 C5 C4 123.18(17) . . ?
C7 C6 C5 118.51(18) . . ?
C7 C6 H6 120.7 . . ?
C5 C6 H6 120.7 . . ?
C8 C7 C6 120.16(18) . . ?
C8 C7 H7 119.9 . . ?
C6 C7 H7 119.9 . . ?
C7 C8 C9 117.88(18) . . ?
C7 C8 H8 121.1 . . ?
C9 C8 H8 121.1 . . ?
N7 C9 C8 121.97(17) . . ?
N7 C9 C10 115.48(16) . . ?
C8 C9 C10 122.54(17) . . ?
N6 C10 C9 113.49(16) . . ?
N6 C10 C11 125.67(17) . . ?
C9 C10 C11 120.84(16) . . ?
C10 C11 H11A 109.5 . . ?
C10 C11 H11B 109.5 . . ?
H11A C11 H11B 109.5 . . ?
C10 C11 H11C 109.5 . . ?
H11A C11 H11C 109.5 . . ?
H11B C11 H11C 109.5 . . ?
C1 N1 H1A 119(2) . . ?
C1 N1 H1B 121.6(19) . . ?
H1A N1 H1B 119(3) . . ?
C2 N2 H2A 119.3(19) . . ?
C2 N2 H2B 119.8(19) . . ?
H2A N2 H2B 120(3) . . ?
N5 N3 C1 114.94(15) . . ?
N5 N3 H3 122.0(17) . . ?
C1 N3 H3 123.0(17) . . ?
N6 N4 C2 114.98(15) . . ?
N6 N4 H4 120.7(17) . . ?
C2 N4 H4 122.4(17) . . ?
C14 Cr1 C17 88.86(8) . . ?
C14 Cr1 C16 91.79(8) . . ?
C17 Cr1 C16 176.56(8) . . ?
C14 Cr1 C15 84.30(7) . . ?
C17 Cr1 C15 90.95(8) . . ?
C16 Cr1 C15 92.47(8) . . ?
C14 Cr1 C13 90.24(7) . 2_645 ?
C17 Cr1 C13 89.77(8) . 2_645 ?
C16 Cr1 C13 86.85(8) . 2_645 ?
C15 Cr1 C13 174.47(7) . 2_645 ?
C14 Cr1 C12 175.31(7) . . ?
C17 Cr1 C12 90.29(8) . . ?
C16 Cr1 C12 89.33(7) . . ?
C15 Cr1 C12 91.11(7) . . ?
C13 Cr1 C12 94.37(7) 2_645 . ?
N12 C12 Cr1 174.47(16) . . ?
N13 C13 Cr1 176.25(17) . 2_655 ?
N14 C14 Cr1 174.71(18) . . ?
N15 C15 Cr1 174.25(18) . . ?
N16 C16 Cr1 175.72(19) . . ?
N17 C17 Cr1 178.8(2) . . ?
C12 N12 Ho1 159.17(15) . . ?
C13 N13 Ho1 155.46(14) . . ?
H5WA O5 H5WB 105(3) . . ?
H6WA O6 H6WB 110(3) . . ?
H7WA O7 H7WB 102(3) . . ?
 
loop_
 _geom_hbond_atom_site_label_D 
 _geom_hbond_atom_site_label_H 
 _geom_hbond_atom_site_label_A 
 _geom_hbond_distance_DH 
 _geom_hbond_distance_HA 
 _geom_hbond_distance_DA 
 _geom_hbond_angle_DHA 
 _geom_hbond_site_symmetry_A 
O3 H3WA N14  0.801(15) 1.932(15) 2.729(2) 173(3) 1_565
O3 H3WB N15  0.792(15) 2.069(16) 2.846(2) 167(3) 2_755
O4 H4WA O5  0.783(15) 1.978(15) 2.760(2) 176(3) .
O4 H4WB O5  0.793(15) 2.084(15) 2.875(2) 174(3) 3_665
N1 H1A O6  0.83(3) 2.13(3) 2.941(3) 165(3) 3_765
N1 H1B O6  0.85(3) 2.15(3) 2.963(3) 160(3) .
N2 H2A N16  0.80(3) 2.21(3) 3.002(3) 169(3) 3_665
N3 H3 N14  0.84(2) 2.64(3) 3.389(3) 149(2) 2_755
N4 H4 N12  0.86(3) 2.66(3) 3.332(2) 137(2) 2_655
N4 H4 N13  0.86(3) 2.73(2) 3.424(2) 139(2) 2_655
O5 H5WA N16  0.797(15) 2.249(16) 3.045(3) 176(3) 3_665
O5 H5WB N17  0.788(16) 2.351(18) 3.105(3) 160(3) 2_655
O6 H6WA O7  0.803(16) 2.010(19) 2.772(3) 158(3) 4_565
O6 H6WB N14  0.796(16) 2.294(19) 3.063(3) 163(4) 2_755
O7 H7WA N17  0.809(16) 2.109(17) 2.910(3) 170(3) .
O7 H7WB N15  0.803(15) 2.124(17) 2.921(3) 171(3) 4_566
C3 H3B O7  0.98 2.61 3.465(3) 145.2 .
C6 H6 O7  0.95 2.63 3.583(3) 177.2 .
C8 H8 O2  0.95 2.62 3.538(2) 163.9 4_576
 
_refine_diff_density_max    1.371
_refine_diff_density_min   -1.085
_refine_diff_density_rms    0.123

_shelx_res_file
;
TITL c99_1_cr2_150k
    shelx.res
    created by SHELXL-2016/6 at 17:57:41 on 25-Feb-2022
CELL  0.71073  12.8518  12.8157  17.2114   90.000  103.557   90.000
ZERR     4.00   0.0007   0.0007   0.0010    0.000    0.006    0.000
LATT   1
SYMM  - X, 1/2 + Y, 1/2 - Z
SFAC  C    Cr  H    HO   N    O
UNIT  68   4   100  4    52   28
MERG   2
omit    -4  19   1
omit    -3  19   1
omit    -6  17  11
omit     7  16   9
omit    12  14   4
omit    -8  17   8
omit     4  10   4
omit   -10  15  12
omit    -8   8  12
omit    -6   1  26
omit    11   8  15
omit     5   4   3
omit    -5   3   5
omit   -10  14  14
eqiv $1   -x+1, y+1/2, -z+1/2
eqiv $2   -x+1, y-1/2, -z+1/2
eqiv $3   x, y+1, z
eqiv $4   -x+2, y+1/2, -z+1/2
eqiv $5   -x+1, -y+1, -z
eqiv $6   x, -y+1/2, z-1/2
eqiv $7   x, -y+1/2, z+1/2
eqiv $8   x, -y+3/2, z+1/2
eqiv $9   2-x, 1-y, -z
htab
htab O3 n14_$3
htab O3 n15_$4
htab O4 O5
htab O4 O5_$5
htab N1 O6_$9
htab N1 O6
htab N2 N16_$5
htab N3 N14_$4
htab N4 N12_$1
htab N4 N13_$1
htab O5 N16_$5
htab O5 N17_$1
htab O6 O7_$6
htab O6 N14_$4
htab O7 N17
htab O7 N15_$7
htab C3 O7
htab c6 O7
htab C8 O2_$8
rtab M...M ho1 Cr1
rtab M...M ho1 Cr1_$1
rtab ang Cr1 Ho1 Cr1_$1
rtab ang Ho1 Cr1 Ho1_$2
FMAP   2
PLAN   20
ACTA   62
BOND   $H
temp -123
size 0.035 0.165 0.321
L.S.  20
sadi o3 h3wa o3 h3wb o4 h4wa o4 h4wb o5 h5wa o5 h5wb o6 h6wa o6 h6wb =
          O7 H7WA O7 H7WB
WGHT    0.027100    1.561500
FVAR       1.00292
MOLE    1
HO1   4    0.685283    0.610570    0.206341    11.00000    0.00500    0.00547 =
         0.00621   -0.00073    0.00117    0.00040
N5    5    0.858951    0.516668    0.262905    11.00000    0.00771    0.00900 =
         0.00942   -0.00120    0.00364   -0.00054
N6    5    0.633642    0.759643    0.289305    11.00000    0.00723    0.00828 =
         0.01088   -0.00138    0.00134    0.00071
N7    5    0.751951    0.604899    0.355537    11.00000    0.00864    0.01151 =
         0.00781   -0.00147    0.00058    0.00109
O1    6    0.781067    0.558147    0.114026    11.00000    0.00944    0.01884 =
         0.01011   -0.00045    0.00333    0.00394
O2    6    0.600378    0.756086    0.134778    11.00000    0.01499    0.00884 =
         0.01037    0.00020    0.00336    0.00417
O3    6    0.826211    0.730831    0.220302    11.00000    0.00821    0.00790 =
         0.02935   -0.00161    0.00222   -0.00203
H3WA  3    0.822861    0.793135    0.222743    11.00000   -1.50000
H3WB  3    0.885739    0.720639    0.244606    11.00000   -1.50000
O4    6    0.570251    0.545619    0.089241    11.00000    0.01072    0.01619 =
         0.01115   -0.00581   -0.00200    0.00274
H4WA  3    0.514571    0.568782    0.067646    11.00000   -1.50000
H4WB  3    0.589841    0.501130    0.063958    11.00000   -1.50000
MOLE    3
C1    1    0.871942    0.517221    0.131146    11.00000    0.01106    0.01348 =
         0.01229   -0.00134    0.00513    0.00094
C2    1    0.559221    0.829909    0.164882    11.00000    0.01031    0.01026 =
         0.01243   -0.00059    0.00241   -0.00043
C3    1    0.978040    0.412287    0.367049    11.00000    0.01409    0.02139 =
         0.01569    0.00179    0.00029    0.00854
AFIX 137
H3A   3    0.962652    0.343339    0.342409    11.00000   -1.50000
H3B   3    0.988991    0.405978    0.425151    11.00000   -1.50000
H3C   3    1.042856    0.440659    0.354269    11.00000   -1.50000
AFIX   0
C4    1    0.886086    0.483686    0.335550    11.00000    0.00771    0.01039 =
         0.01142   -0.00115    0.00081   -0.00086
C5    1    0.818593    0.526435    0.387636    11.00000    0.00886    0.01203 =
         0.00810   -0.00061    0.00063   -0.00052
C6    1    0.824932    0.491371    0.465491    11.00000    0.01670    0.01693 =
         0.01073    0.00288    0.00060    0.00181
AFIX  43
H6    3    0.868215    0.433058    0.486266    11.00000   -1.20000
AFIX   0
C7    1    0.766314    0.543883    0.511988    11.00000    0.02068    0.02312 =
         0.00959    0.00374    0.00343   -0.00031
AFIX  43
H7    3    0.766310    0.519075    0.564001    11.00000   -1.20000
AFIX   0
C8    1    0.707834    0.632509    0.482412    11.00000    0.01542    0.02405 =
         0.00991   -0.00314    0.00394   -0.00009
AFIX  43
H8    3    0.672631    0.672536    0.515048    11.00000   -1.20000
AFIX   0
C9    1    0.702498    0.660858    0.402993    11.00000    0.00960    0.01380 =
         0.00850   -0.00265    0.00206   -0.00004
C10   1    0.643890    0.755110    0.365496    11.00000    0.00795    0.01249 =
         0.01065   -0.00418    0.00091    0.00067
C11   1    0.602818    0.834244    0.415027    11.00000    0.01814    0.02046 =
         0.01507   -0.00774    0.00419    0.00498
AFIX 137
H11A  3    0.602637    0.903342    0.390605    11.00000   -1.50000
H11B  3    0.649166    0.835390    0.469067    11.00000   -1.50000
H11C  3    0.529785    0.815761    0.417804    11.00000   -1.50000
AFIX   0
N1    5    0.927869    0.499123    0.076581    11.00000    0.01857    0.03921 =
         0.01471    0.00286    0.00861    0.01454
rem AFIX  93
H1A   3    0.904268    0.519693    0.030025    11.00000   -1.20000
H1B   3    0.990101    0.473167    0.089056    11.00000   -1.20000
rem AFIX   0
N2    5    0.497742    0.902302    0.121172    11.00000    0.02714    0.01550 =
         0.01319   -0.00155   -0.00092    0.01348
rem AFIX  93
H2A   3    0.475942    0.893123    0.073967    11.00000   -1.20000
H2B   3    0.474606    0.950143    0.143132    11.00000   -1.20000
rem AFIX   0
N3    5    0.916404    0.488109    0.208519    11.00000    0.00887    0.01485 =
         0.01270    0.00068    0.00450    0.00624
rem AFIX  43
H3    3    0.972451    0.452106    0.221559    11.00000   -1.20000
rem AFIX   0
N4    5    0.577399    0.839877    0.246473    11.00000    0.01119    0.00849 =
         0.01192   -0.00120    0.00174    0.00416
rem AFIX  43
H4    3    0.542872    0.883181    0.268748    11.00000   -1.20000
rem AFIX   0
MOLE    2
CR1   2    0.721103    0.173323    0.235734    11.00000    0.00555    0.00584 =
         0.00944    0.00065    0.00171    0.00013
C12   1    0.676766    0.330291    0.232737    11.00000    0.00725    0.01119 =
         0.01293   -0.00010    0.00227   -0.00044
C13   1    0.422026    0.619537    0.242800    11.00000    0.00974    0.00844 =
         0.01267   -0.00055    0.00225   -0.00295
C14   1    0.777447    0.022271    0.238824    11.00000    0.01122    0.01261 =
         0.01525    0.00017    0.00431   -0.00108
C15   1    0.867975    0.212160    0.212901    11.00000    0.01226    0.01310 =
         0.01469    0.00143    0.00277    0.00108
C16   1    0.648423    0.161692    0.114897    11.00000    0.01456    0.01253 =
         0.01573    0.00089    0.00352    0.00290
C17   1    0.784743    0.183475    0.357825    11.00000    0.01332    0.01613 =
         0.01684    0.00092    0.00399    0.00013
N12   5    0.660447    0.419142    0.230444    11.00000    0.00921    0.01157 =
         0.01795   -0.00046    0.00166   -0.00032
N13   5    0.504316    0.591062    0.235122    11.00000    0.01121    0.01071 =
         0.01572   -0.00255    0.00479   -0.00143
N14   5    0.816706   -0.058861    0.242524    11.00000    0.02879    0.01335 =
         0.03275    0.00087    0.01197    0.00372
N15   5    0.952141    0.225585    0.202870    11.00000    0.01312    0.03161 =
         0.02801    0.00221    0.00717   -0.00131
N16   5    0.601985    0.157108    0.048686    11.00000    0.02785    0.02639 =
         0.01619   -0.00125   -0.00016    0.00674
N17   5    0.818826    0.187900    0.425868    11.00000    0.02931    0.04037 =
         0.01464    0.00009    0.00051    0.00187
MOLE    3
O5    6    0.374191    0.620092    0.006131    11.00000    0.01744    0.01975 =
         0.02158   -0.00005    0.00440    0.00471
H5WA  3    0.383827    0.678364   -0.006838    11.00000   -1.50000
H5WB  3    0.320088    0.622719    0.020154    11.00000   -1.50000
O6    6    1.133092    0.392859    0.078224    11.00000    0.02610    0.03614 =
         0.02198   -0.00053    0.00047    0.00360
H6WA  3    1.108566    0.335035    0.071591    11.00000   -1.50000
H6WB  3    1.159473    0.402258    0.124359    11.00000   -1.50000
O7    6    0.996424    0.276938    0.544001    11.00000    0.03813    0.03448 =
         0.01743    0.00210    0.00216   -0.00630
H7WA  3    0.944460    0.249450    0.515689    11.00000   -1.50000
H7WB  3    0.978974    0.280940    0.585781    11.00000   -1.50000
HKLF    4


REM  c99_1_cr2_150k
REM R1 =  0.0233 for    8479 Fo > 4sig(Fo)  and  0.0265 for all    9216 data
REM    402 parameters refined using     45 restraints

END

WGHT      0.0263      1.3502

REM Instructions for potential hydrogen bonds
HTAB O3 N14_$3
HTAB O3 N15_$4
HTAB O4 O5
HTAB O4 O5_$5
HTAB C3 O7
HTAB C6 O7
HTAB C8 O2_$8
HTAB N1 O6_$9
HTAB N1 O6
HTAB N2 N16_$5
HTAB N3 N14_$4
HTAB N4 N12_$1
HTAB O5 N16_$5
HTAB O5 N17_$1
HTAB O6 O7_$6
HTAB O6 N14_$4
HTAB O7 N17
HTAB O7 N15_$7

REM Highest difference peak  1.371,  deepest hole -1.085,  1-sigma level  0.123
Q1    1   0.6554  0.6584  0.1865  11.00000  0.05    1.37
Q2    1   0.6546  0.5633  0.1891  11.00000  0.05    1.25
Q3    1   0.7165  0.6583  0.2219  11.00000  0.05    1.24
Q4    1   0.7167  0.5626  0.2222  11.00000  0.05    1.14
Q5    1   0.6804  0.6093  0.1517  11.00000  0.05    0.93
Q6    1   0.6851  0.6105  0.2620  11.00000  0.05    0.92
Q7    1   0.6830  0.5460  0.2074  11.00000  0.05    0.67
Q8    1   0.6546  0.6811  0.2418  11.00000  0.05    0.65
Q9    1   0.7856  0.6838  0.2115  11.00000  0.05    0.63
Q10   1   1.0547  0.3873  0.6177  11.00000  0.05    0.61
Q11   1   0.8213  0.5188  0.4268  11.00000  0.05    0.61
Q12   1   0.6666  0.7078  0.3875  11.00000  0.05    0.60
Q13   1   0.6502  0.7154  0.1529  11.00000  0.05    0.59
Q14   1   0.5961  0.5568  0.1369  11.00000  0.05    0.58
Q15   1   0.6509  0.4798  0.2289  11.00000  0.05    0.56
Q16   1   0.8515  0.4957  0.3626  11.00000  0.05    0.56
Q17   1   0.6082  0.7955  0.2669  11.00000  0.05    0.53
Q18   1   0.6505  0.7450  0.2298  11.00000  0.05    0.52
Q19   1   0.8368  0.5587  0.2460  11.00000  0.05    0.51
Q20   1   0.8161 -0.0052  0.2218  11.00000  0.05    0.51
;
_shelx_res_checksum   26065

_shelx_hkl_file
;
   0   0   2 154865. 2774.12   3
   0   0  -2 162020. 2775.63   3
   0   0  -3 9.29494 10.0924   2
   0   0  -3-1.64727 8.65416   3
   0   0  -3 22.5804 6.89812   4
   0   0   3 10.6175 7.29660   3
   0   0   4 50726.6 1099.15   3
   0   0  -4 52272.3 1086.74   4
   0   0  -4 50277.3 1096.37   2
   0   0  -4 51458.6 1102.56   3
   0   0   5 15.4876 9.65289   3
   0   0  -5 5.79588 9.55277   2
   0   0  -5 7.00295 6.12918   4
   0   0  -5-4.55234 8.68941   3
   0   0  -6 42092.4 957.064   3
   0   0   6 43171.5 953.034   3
   0   0  -6 45154.3 950.476   2
   0   0  -6 43514.9 935.458   4
   0   0  -7 21.1701 13.7989   3
   0   0  -7 15.3715 11.9428   4
   0   0  -7 3.68604 12.9592   2
   0   0  -8 5940.78 164.041   2
   0   0  -8 4954.33 166.099   3
   0   0  -8 5083.17 145.361   4
   0   0  -9-1.03046 14.0487   2
   0   0  -9 23.4774 23.0376   3
   0   0 -10 14197.3 353.694   2
   0   0 -10 12655.7 358.766   3
   0   0 -11 47.4948 20.4434   2
   0   0 -11 31.1513 19.7211   3
   0   0 -12 21807.1 561.259   3
   0   0 -13 40.3431 26.9140   3
   0   0 -14 17841.3 498.867   3
   0   0 -15 98.1272 43.5893   3
   0   0 -16 1262.68 102.026   3
   0   0 -17 9.87735 25.0570   3
   0   0 -18 1656.91 127.010   3
   0   0 -19 28.0179 19.3403   3
   0   0 -20 4445.53 233.530   3
   0   0 -21 128.155 54.6158   3
   0   0 -22 7651.95 346.495   3
   0   0 -23 47.3183 37.9325   3
   0   0 -24 9921.50 431.829   3
   0   1   1 2052.92 57.1264   3
   0  -1  -1 2057.00 57.9719   3
   0  -1  -2 1353.27 47.0121   3
   0   1   2 1417.27 46.5019   3
   0  -1  -2 1304.92 40.5958   5
   0  -1   3 14475.6 320.965   3
   0   1  -3 14448.6 320.991   3
   0  -1  -3 15568.5 337.042   3
   0  -1  -3 14266.3 327.727   4
   0  -1   3 14664.2 319.760   2
   0   1  -3 13313.4 320.449   2
   0   1   3 14390.2 333.343   3
   0   1   4 22064.5 498.734   5
   0  -1   4 22735.6 494.547   3
   0   1   4 22868.2 507.209   3
   0  -1  -4 22576.8 497.567   4
   0   1  -4 21023.9 492.408   2
   0  -1   4 19056.5 488.496   2
   0  -1  -4 23674.4 512.171   3
   0   1  -4 22938.9 495.526   3
   0   1  -5 11818.2 273.775   3
   0   1  -5 9774.85 269.923   2
   0   1   5 11436.0 274.918   5
   0  -1  -5 12299.3 291.023   3
   0  -1  -5 12252.7 273.063   4
   0  -1   5 11544.8 272.026   3
   0  -1   5 11466.2 266.651   2
   0   1   5 11778.3 284.188   3
   0  -1   5 11702.5 253.043   4
   0   1   6 350.672 31.7552   5
   0  -1  -6 482.316 37.6042   3
   0  -1  -6 477.483 31.5765   4
   0  -1   6 527.824 32.8483   3
   0   1  -6 481.172 32.6614   3
   0   1  -6 355.030 29.4790   2
   0   1   6 535.898 37.5119   3
   0   1  -7 58912.2 982.445   3
   0   1   7 55852.7 982.615   5
   0  -1  -7 60063.0 1007.34   3
   0   1  -7 60006.8 970.989   2
   0  -1  -7 58686.8 972.577   4
   0   1   8 1042.66 61.6204   5
   0  -1  -8 1285.37 71.9556   3
   0   1  -8 1036.47 58.2789   2
   0  -1  -8 893.238 60.9681   2
   0  -1  -8 1335.99 60.2427   4
   0   1  -8 1223.78 63.6146   3
   0  -1  -9 11285.9 316.903   3
   0   1  -9 10553.6 290.966   2
   0  -1  -9 11318.4 287.706   4
   0  -1  -9 12731.5 312.852   2
   0   1  -9 11000.8 297.891   3
   0   1 -10 28.8743 17.1342   3
   0   1 -10 7.35421 9.11162   2
   0  -1 -10 25.9814 11.2417   4
   0  -1 -10 0.26482 12.0131   2
   0  -1 -10 7.32703 12.9640   3
   0   1 -11 1411.43 77.2356   2
   0   1 -11 1409.78 80.8204   3
   0  -1 -11 1410.28 73.5581   4
   0  -1 -11 1426.37 89.5805   3
   0   1 -12 1513.90 80.7126   2
   0   1 -12 1368.65 85.7576   3
   0  -1 -12 1460.84 95.1835   3
   0  -1 -13 1418.47 96.8471   3
   0   1 -13 1464.71 91.8339   3
   0   1 -14 7564.19 262.440   3
   0  -1 -14 7736.34 277.516   3
   0   1 -15 17923.3 507.379   3
   0  -1 -15 18238.0 523.845   3
   0  -1 -16 14207.1 450.512   3
   0   1 -16 14352.9 435.104   3
   0   1 -17 17732.8 518.704   3
   0  -1 -17 17335.2 534.422   3
   0  -1 -18 5951.72 268.026   3
   0   1 -18 5955.91 256.617   3
   0  -1 -19 6737.97 300.904   3
   0   1 -19 7104.80 294.516   3
   0  -1 -20 5572.47 275.039   3
   0   1 -20 5850.17 268.887   3
   0   1 -21 3688.11 209.895   3
   0  -1 -21 2881.06 195.552   3
   0   1 -22 1342.98 129.755   3
   0  -1 -22 1380.01 133.961   3
   0   1 -23 590.572 73.3984   3
   0  -1 -23 489.682 73.6713   3
   0  -1 -24 51.8507 61.7922   3
   0  -1 -25 844.735 108.170   3
   0  -2   0 1453.91 42.6271   3
   0  -2   1 98379.1 2046.97   1
   0   2  -1 96865.0 2048.02   1
   0  -2  -1 96707.7 2047.49   3
   0  -2   2 914.889 34.9368   2
   0  -2  -2 1000.62 43.1799   3
   0  -2  -3 30221.1 669.482   3
   0   2   3 30183.7 665.644   3
   0  -2   3 30864.7 646.856   2
   0   2  -3 29403.0 650.161   2
   0   2   4 766.197 43.2609   3
   0   2  -4 697.847 27.9142   3
   0  -2  -4 669.629 33.3098   5
   0  -2  -4 746.983 43.3486   3
   0  -2   4 648.451 30.8256   2
   0  -2   4 657.165 27.0265   3
   0   2  -4 646.201 30.7047   2
   0  -2   5 11611.0 264.660   2
   0  -2  -5 12199.9 296.609   3
   0   2  -5 11985.0 268.779   2
   0   2  -5 11065.9 265.886   3
   0  -2   5 11295.3 264.725   3
   0  -2  -5 11212.4 281.707   4
   0  -2   6 130.084 15.7031   3
   0  -2  -6 81.0650 19.0708   3
   0   2  -6 122.992 15.8699   3
   0  -2  -6 92.3008 14.0734   4
   0  -2   6 94.1974 13.9339   2
   0   2  -6 123.462 15.9418   2
   0  -2   7 1191.86 53.3462   2
   0  -2  -7 1656.84 81.1603   3
   0   2  -7 1585.13 63.1594   3
   0  -2  -7 1543.67 69.1507   4
   0   2  -7 1504.73 60.1748   2
   0  -2  -8 48.7067 15.2057   4
   0   2  -8 59.7567 14.7492   2
   0  -2  -8 81.8090 30.6364   3
   0   2  -8 43.8970 11.5712   3
   0  -2  -9 10492.4 299.744   3
   0   2  -9 10705.4 268.890   3
   0  -2  -9 10933.9 273.069   4
   0   2  -9 10614.8 259.129   2
   0   2 -10 2942.13 105.176   2
   0  -2 -10 2954.30 136.438   3
   0   2 -10 2940.48 115.228   3
   0  -2 -10 2680.94 111.962   4
   0   2 -11 34184.7 794.565   3
   0   2 -11 34553.4 776.553   2
   0  -2 -11 34656.8 792.415   4
   0  -2 -11 32676.6 827.896   3
   0   2 -12 51.2430 30.0299   3
   0  -2 -12 46.8981 16.4528   4
   0  -2 -12 42.4099 31.3377   3
   0   2 -12 50.0147 18.7278   2
   0  -2 -13 18166.1 457.540   4
   0   2 -13 17037.9 442.120   2
   0  -2 -13 17586.8 499.049   3
   0   2 -13 17273.2 462.558   3
   0   2 -14 16.9376 16.5914   3
   0  -2 -14 21.8813 30.7601   3
   0   2 -15 4874.00 197.287   3
   0  -2 -15 4723.59 217.222   3
   0  -2 -16 24.0823 37.4161   3
   0   2 -16 34.4694 24.7913   3
   0  -2 -17 163.540 39.1263   3
   0   2 -17 146.503 39.8474   3
   0  -2 -18 55.3538 23.0432   3
   0   2 -18 34.6321 16.5444   3
   0  -2 -19 3666.54 217.590   3
   0   2 -19 3938.71 199.529   3
   0   2 -20 120.904 48.4215   3
   0  -2 -20 7.52178 50.0781   3
   0   2 -21 12078.8 423.280   3
   0  -2 -21 10638.4 438.147   3
   0  -2 -22 1352.01 142.780   3
   0   2 -22 1453.28 137.045   3
   0  -2 -23 5023.51 291.931   3
   0  -2 -24 431.665 91.2727   3
   0  -2 -25 2824.42 228.737   3
   0  -3   0 22.3955 6.69776   3
   0  -3   1 43.0617 6.75004   3
   0   3  -1 47.7298 11.4165   1
   0  -3  -1 43.8278 12.6270   3
   0  -3  -2 26688.1 593.636   3
   0  -3   2 26522.5 580.691   2
   0  -3   2 26714.0 587.829   1
   0  -3  -3 354.694 30.6867   3
   0  -3   3 399.018 25.1310   2
   0   3  -4 31089.0 686.731   2
   0  -3  -4 32000.5 718.194   3
   0  -3   4 32346.1 688.648   2
   0  -3  -5 14579.3 353.072   4
   0   3  -5 14245.5 333.426   2
   0   3  -5 14265.7 321.360   3
   0  -3   5 14432.5 326.012   2
   0  -3  -5 14360.6 362.503   3
   0  -3  -5 14650.7 339.143   5
   0   3  -6 42040.2 806.641   3
   0  -3  -6 43389.4 861.744   3
   0  -3   6 43397.9 808.554   2
   0  -3  -6 42184.5 841.677   4
   0  -3  -7 2676.58 106.718   4
   0   3  -7 2721.52 87.8247   3
   0  -3   7 2684.66 84.9794   2
   0  -3  -7 2706.96 116.458   3
   0   3  -7 2778.26 92.5445   2
   0  -3  -8 21966.6 525.339   4
   0  -3   8 20065.6 491.854   2
   0  -3  -8 22676.1 549.751   3
   0   3  -8 22563.9 504.343   2
   0   3  -8 22675.8 501.434   3
   0   3  -9 722.661 46.3844   3
   0  -3  -9 763.681 65.5254   3
   0  -3  -9 735.385 53.1459   4
   0   3  -9 784.854 46.2354   2
   0  -3 -10 9608.36 309.073   3
   0  -3 -10 9552.24 281.657   4
   0   3 -10 10296.8 264.995   2
   0   3 -10 10269.2 270.052   3
   0   3 -11 731.897 47.8632   2
   0   3 -11 786.204 54.5219   3
   0  -3 -11 758.867 71.5212   3
   0  -3 -11 685.048 57.3555   4
   0   3 -12 2089.73 98.5628   3
   0  -3 -12 2134.66 125.597   3
   0   3 -12 1989.41 90.7590   2
   0  -3 -12 2054.81 105.800   4
   0   3 -13 625.104 55.6527   3
   0   3 -13 470.092 43.0893   2
   0  -3 -13 477.003 45.7348   4
   0  -3 -13 503.433 66.9890   3
   0  -3 -14 9540.73 294.570   4
   0  -3 -14 9582.86 332.970   3
   0   3 -14 9743.93 290.328   3
   0   3 -14 8487.95 271.225   2
   0   3 -15 6430.76 227.234   3
   0  -3 -15 6043.36 260.430   3
   0  -3 -15 6143.13 225.899   4
   0  -3 -16 10179.2 374.994   3
   0   3 -16 10539.3 332.789   3
   0   3 -17 6523.04 246.498   3
   0  -3 -17 5683.94 273.135   3
   0  -3 -18 10484.7 405.608   3
   0   3 -18 11126.2 366.026   3
   0   3 -19 3189.65 176.554   3
   0  -3 -19 2906.76 196.805   3
   0   3 -20 6018.18 259.083   3
   0  -3 -20 5439.84 289.271   3
   0  -3 -21 1470.11 152.442   3
   0   3 -21 1790.01 142.783   3
   0  -3 -22 719.065 90.4931   3
   0  -3 -23-20.8409 36.8736   3
   0  -3 -24 561.934 97.6039   3
   0  -4   0 31988.7 694.401   3
   0   4  -1 310.730 28.5586   1
   0  -4   1 314.029 18.6058   3
   0  -4  -1 318.839 24.5631   3
   0   4  -2 17947.2 436.931   1
   0  -4   2 19052.2 430.785   1
   0  -4  -2 18855.7 433.316   3
   0  -4  -3 162.390 22.3188   3
   0  -4   3 220.930 20.7825   2
   0  -4   3 166.943 22.8115   1
   0  -4   4 14342.2 338.134   2
   0  -4  -4 14513.7 359.495   3
   0  -4   4 13872.2 345.037   1
   0  -4   5 4710.38 128.374   2
   0  -4  -5 4624.39 156.222   3
   0  -4  -6 82.9474 24.8925   4
   0   4  -6 49.9334 10.0084   3
   0   4  -6 42.5681 11.0012   2
   0  -4  -6 101.358 24.7181   3
   0  -4  -6 75.0621 17.7253   5
   0  -4   6 54.8645 12.5732   2
   0   4  -7 498.419 27.8592   3
   0   4  -7 458.252 31.4861   2
   0  -4   7 501.738 30.5709   2
   0  -4  -7 473.069 48.7719   3
   0  -4  -7 523.861 45.2087   4
   0  -4  -8 2748.77 128.012   3
   0  -4  -8 2712.70 115.161   4
   0  -4   8 2769.75 88.5109   2
   0   4  -8 2716.80 97.4066   2
   0   4  -8 2875.83 90.8592   3
   0  -4  -9 6661.30 213.414   4
   0   4  -9 6356.17 188.399   2
   0  -4  -9 6976.98 234.791   3
   0   4  -9 6661.87 180.247   3
   0  -4   9 6345.66 172.915   2
   0   4 -10 16058.9 399.684   2
   0  -4  10 15034.7 378.961   2
   0   4 -10 17568.5 397.766   3
   0  -4 -10 17231.8 462.472   3
   0  -4 -10 16544.5 431.447   4
   0   4 -11 3989.24 140.710   2
   0  -4 -11 4048.64 183.023   3
   0  -4 -11 4320.95 168.097   4
   0   4 -11 4190.32 141.092   3
   0   4 -12 6917.24 207.020   3
   0  -4 -12 6716.08 257.727   3
   0  -4 -12 6839.66 232.723   4
   0   4 -12 6229.48 200.961   2
   0  -4 -13 1034.39 93.5300   3
   0   4 -13 847.961 60.7688   2
   0   4 -13 1050.77 67.0204   3
   0  -4 -13 993.110 77.9149   4
   0  -4 -14 6677.77 272.631   3
   0  -4 -14 6921.70 242.411   4
   0   4 -14 6015.11 209.023   2
   0   4 -14 6849.57 221.200   3
   0  -4 -15 720.682 63.9653   4
   0  -4 -15 674.453 77.0969   3
   0   4 -15 664.161 61.1531   3
   0  -4 -16 437.505 55.9405   4
   0  -4 -16 377.959 60.2379   3
   0   4 -16 361.373 41.4078   3
   0   4 -17 1.79988 31.0077   3
   0  -4 -17-17.5134 32.4869   3
   0  -4 -18 511.528 83.5930   3
   0   4 -18 600.446 65.2142   3
   0   4 -19 798.336 78.7373   3
   0  -4 -19 605.320 100.417   3
   0  -4 -20 6197.34 320.987   3
   0  -4 -21 1394.66 147.147   3
   0  -4 -22 7622.89 377.388   3
   0  -4 -23 2357.30 207.859   3
   0  -4 -24 3320.34 261.676   3
   0  -5   0 8.89826 6.93290   3
   0   5  -1 5040.71 151.002   1
   0  -5  -1 4554.65 137.378   3
   0  -5   1 4839.36 124.566   3
   0  -5   2 2033.21 58.6777   3
   0  -5  -2 2241.45 84.9876   3
   0   5  -2 2118.58 86.0313   1
   0  -5   3 14286.8 349.320   2
   0  -5  -3 14371.4 364.317   3
   0  -5   3 15443.3 360.511   1
   0  -5   4 13766.2 339.049   2
   0  -5   4 14316.7 348.250   1
   0  -5  -4 14112.6 359.785   3
   0  -5   5 71509.2 1536.56   2
   0  -5   5 71201.2 1550.36   1
   0  -5  -5 71444.1 1568.94   3
   0  -5   6 8552.95 217.488   2
   0  -5  -6 8826.55 263.022   3
   0  -5  -6 8680.71 256.390   4
   0  -5   7 46626.6 1028.13   2
   0  -5  -7 48944.8 1097.84   3
   0  -5  -7 48227.3 1083.40   4
   0  -5  -7 49199.9 1051.07   5
   0   5  -8 173.839 21.5844   2
   0   5  -8 162.517 16.6025   3
   0  -5  -8 213.640 38.2243   4
   0  -5  -8 180.987 37.8429   3
   0  -5   8 165.033 11.6065   4
   0  -5   8 203.296 21.4846   2
   0  -5  -9 20887.9 539.870   3
   0  -5   9 20109.2 458.087   2
   0  -5  -9 19834.3 516.983   4
   0   5  -9 19491.1 454.628   3
   0   5  -9 20662.1 465.066   2
   0  -5  10 321.520 27.6657   2
   0   5 -10 352.768 30.2312   3
   0   5 -10 309.892 26.7373   2
   0  -5 -10 256.817 41.1898   4
   0  -5 -10 361.965 57.4381   3
   0   5 -11 1966.33 82.1794   2
   0   5 -11 1861.37 78.2251   3
   0  -5 -11 1889.86 118.199   3
   0  -5 -11 1846.40 106.486   4
   0  -5 -12 360.641 48.0934   4
   0   5 -12 409.401 35.8174   2
   0   5 -12 382.139 37.8876   3
   0  -5 -12 425.475 61.3555   3
   0  -5 -13 1056.65 86.0128   4
   0   5 -13 1235.41 68.4919   2
   0  -5 -13 1050.04 96.0749   3
   0   5 -13 1128.79 67.2635   3
   0   5 -14 5411.73 182.720   3
   0  -5 -14 5119.26 211.424   4
   0  -5 -14 5165.50 240.638   3
   0  -5 -15 1049.83 106.415   3
   0   5 -15 956.775 68.1681   3
   0  -5 -15 877.081 83.1013   4
   0  -5 -16 4425.13 202.460   4
   0   5 -16 4459.60 174.264   3
   0  -5 -16 4401.62 230.581   3
   0  -5 -17 4326.37 209.064   4
   0   5 -17 4666.24 188.396   3
   0  -5 -17 4696.46 250.214   3
   0   5 -18 5120.57 206.085   3
   0  -5 -18 4714.09 260.164   3
   0  -5 -19 7756.57 359.628   3
   0  -5 -20 2494.34 201.002   3
   0  -5 -21 543.659 90.1198   3
   0  -5 -22 529.649 89.8895   3
   0  -5 -23 668.642 100.929   3
   0  -6   0 1231.34 55.4827   3
   0  -6  -1 12209.8 300.584   3
   0  -6   1 11947.7 284.018   3
   0   6  -1 12354.0 319.837   1
   0   6  -2 5367.62 169.064   1
   0  -6  -2 5205.48 159.017   3
   0  -6   2 5150.63 130.322   3
   0  -6   3 22645.6 516.939   2
   0  -6  -3 22305.6 528.980   3
   0  -6  -4 294.735 35.2495   3
   0  -6   4 226.225 26.6002   2
   0  -6   4 245.498 30.0529   1
   0  -6  -5 105.923 29.4377   3
   0  -6   5 106.374 23.9663   2
   0  -6   5 82.5295 21.4161   1
   0  -6  -6 5489.34 195.765   4
   0  -6  -6 5776.15 199.305   3
   0  -6   6 5619.37 180.342   1
   0  -6   6 5637.77 163.852   2
   0  -6  -7 13465.8 372.432   3
   0  -6  -7 13561.7 330.224   5
   0  -6   7 12586.3 343.813   1
   0  -6  -7 12504.6 364.427   4
   0  -6   7 12846.9 312.763   2
   0  -6   8 2845.98 94.7305   2
   0  -6  -8 2911.23 137.001   4
   0  -6  -8 3045.09 142.986   3
   0  -6   8 2891.61 82.6745   4
   0  -6  -8 3055.22 113.269   5
   0  -6  -9 6539.84 219.987   4
   0  -6  -9 6605.56 230.432   3
   0  -6   9 6743.00 162.234   2
   0  -6 -10 13686.1 382.275   4
   0   6 -10 11466.3 301.528   3
   0  -6 -10 13536.2 397.494   3
   0  -6  10 13245.8 305.514   2
   0  -6 -11 17794.2 495.319   4
   0  -6 -11 18233.8 519.522   3
   0   6 -11 18487.8 419.524   2
   0   6 -11 18191.8 420.340   3
   0  -6  11 17043.4 414.329   2
   0   6 -12 21886.2 489.830   2
   0   6 -12 20499.4 490.444   3
   0  -6 -12 20409.7 593.895   3
   0  -6 -12 20702.4 569.936   4
   0   6 -13 9962.37 253.510   2
   0  -6 -13 9688.22 348.994   3
   0  -6 -13 9786.47 328.517   4
   0   6 -13 9171.25 254.713   3
   0  -6 -14 10129.0 344.713   4
   0  -6 -14 10259.6 372.729   3
   0   6 -14 9888.09 272.215   3
   0  -6 -15 6485.71 289.000   3
   0  -6 -15 6055.81 252.806   4
   0   6 -15 6333.25 200.101   3
   0  -6 -16 256.827 48.3199   3
   0  -6 -16 161.105 40.1579   4
   0   6 -16 209.747 32.0918   3
   0  -6 -17 36.8755 19.8275   4
   0  -6 -17 92.0193 29.3143   3
   0  -6 -18 229.485 59.2505   3
   0  -6 -19 1811.59 165.095   3
   0  -6 -20 1117.65 133.227   3
   0  -6 -21 8567.05 415.495   3
   0  -6 -22 1611.21 165.867   3
   0   7   0 25.3792 23.0065   1
   0  -7   0-3.01368 10.6985   3
   0   7  -1 10.3846 12.5302   1
   0  -7  -1 10.0193 13.0261   3
   0  -7   1 5.70162 9.41239   3
   0  -7   2 6540.03 165.174   3
   0   7  -2 6831.41 210.575   1
   0  -7  -2 6450.54 195.085   3
   0  -7  -3 102.321 23.4753   3
   0  -7   3 99.6240 11.7669   3
   0   7  -3 49.2738 14.5435   1
   0  -7  -4 35100.2 810.185   3
   0  -7   4 34405.1 793.137   2
   0  -7   5 1085.16 67.0590   1
   0  -7   5 985.760 60.2643   2
   0  -7  -5 1112.10 76.6284   3
   0  -7  -5 1089.39 77.9861   4
   0  -7   6 39599.8 935.619   1
   0  -7   6 41457.6 921.917   2
   0  -7  -6 40757.7 954.467   3
   0  -7  -6 41483.8 963.489   4
   0  -7   7 118.560 19.7831   2
   0  -7  -7 104.111 39.6205   4
   0  -7  -7 103.437 33.6549   3
   0  -7  -8 40576.1 1020.65   3
   0  -7  -8 42842.3 1023.03   4
   0  -7   8 43297.6 947.105   2
   0  -7  -8 43076.1 967.342   5
   0  -7   8 43624.4 933.268   4
   0  -7  -9 10.5255 28.6145   3
   0  -7  -9 17.1271 24.5217   4
   0  -7   9 30.9471 19.8740   2
   0  -7   9 14.3493 9.86612   4
   0  -7 -10 18003.9 505.813   4
   0  -7  10 17900.5 417.925   2
   0  -7 -10 18351.5 516.790   3
   0  -7 -11 155.574 47.5633   3
   0  -7 -11 118.475 30.3022   4
   0  -7  11 143.914 20.1535   2
   0  -7 -12 199.970 40.9146   4
   0  -7 -12 189.309 49.2935   3
   0  -7  12 193.112 22.3955   2
   0   7 -12 142.835 18.9094   3
   0  -7 -13 613.017 67.0027   4
   0  -7 -13 500.608 73.4070   3
   0   7 -13 556.844 41.0540   3
   0  -7 -14 3699.40 203.542   3
   0  -7 -14 3531.35 184.495   4
   0   7 -14 3509.94 120.852   3
   0  -7 -15 5098.81 255.539   3
   0  -7 -15 5104.97 236.213   4
   0  -7 -16 2225.90 168.131   3
   0  -7 -16 2260.43 151.683   4
   0  -7 -17 1791.18 157.668   3
   0  -7 -17 1771.63 134.676   4
   0  -7 -18 4162.75 258.464   3
   0  -7 -18 4473.72 233.527   4
   0  -7 -19 405.532 88.4019   3
   0  -7 -20 1527.87 160.667   3
   0  -7 -21 65.4839 72.4712   3
   0  -7 -22 12.6536 48.6301   3
   0  -8   0 21030.5 501.409   3
   0   8   0 22079.1 545.883   1
   0  -8  -1 8318.97 236.658   3
   0   8  -1 8997.68 265.642   1
   0  -8   1 8456.92 221.091   3
   0  -8  -2 5791.06 183.492   3
   0   8  -2 5769.53 200.673   1
   0  -8   2 5768.78 154.593   3
   0  -8   3 15512.6 349.079   3
   0  -8  -3 15544.9 402.329   3
   0   8  -3 15566.8 419.204   1
   0  -8  -4 1861.99 99.4784   3
   0  -8  -4 2195.75 113.358   4
   0  -8   4 2069.55 97.4622   2
   0  -8  -5 498.234 49.5061   3
   0  -8  -5 542.639 59.6796   4
   0  -8   5 548.388 44.8349   2
   0  -8  -6 4738.65 194.844   4
   0  -8   6 5112.99 173.877   2
   0  -8  -6 4945.05 190.170   3
   0  -8   7 13361.0 326.406   4
   0  -8  -7 12790.0 384.639   3
   0  -8  -7 13438.1 393.656   4
   0  -8   7 12764.9 336.812   2
   0  -8   8 7993.96 224.261   2
   0  -8  -8 8712.27 241.323   5
   0  -8  -8 8117.09 285.199   4
   0  -8   8 8638.35 219.242   4
   0  -8  -8 8011.62 283.134   3
   0  -8  -9 10099.0 332.713   3
   0  -8   9 10038.9 244.247   4
   0  -8  -9 9669.62 327.699   4
   0  -8   9 9943.26 256.274   2
   0  -8  10 15095.2 359.664   2
   0  -8 -10 15081.6 452.672   4
   0  -8 -10 14713.5 454.149   3
   0  -8 -11 7773.77 296.851   3
   0  -8 -11 8371.99 296.360   4
   0  -8  11 7577.76 202.497   2
   0  -8 -12 19947.6 528.561   4
   0  -8 -12 18735.2 533.272   3
   0  -8 -13 6790.49 298.761   3
   0  -8 -13 7471.90 293.244   4
   0  -8 -14 10834.1 406.394   3
   0  -8 -14 11269.7 394.828   4
   0  -8 -15 5456.59 271.555   3
   0  -8 -15 5730.12 260.241   4
   0  -8 -16 845.036 109.195   3
   0  -8 -16 900.137 94.9251   4
   0  -8 -17 179.195 40.9505   4
   0  -8 -17 257.775 80.7607   3
   0  -8 -18 1106.43 134.515   3
   0  -8 -18 1103.12 114.481   4
   0  -8 -19 1679.42 164.899   3
   0  -8 -19 1889.89 151.610   4
   0  -8 -20 3272.95 240.667   3
   0  -8 -21 4714.07 299.628   3
   0   9   0 14.1310 23.9836   1
   0  -9   0 9.49450 7.60454   3
   0   9  -1 1987.89 110.183   1
   0  -9   1 2025.75 81.2277   3
   0  -9  -1 1996.14 89.2137   3
   0  -9  -2 294.825 35.0054   3
   0  -9   2 289.632 25.4725   3
   0   9  -2 307.157 41.8928   1
   0  -9   3 14238.0 325.821   3
   0  -9  -3 14241.7 407.575   4
   0  -9  -3 14126.2 382.142   3
   0   9  -3 13762.1 401.576   1
   0  -9   4 103.420 30.0865   2
   0  -9  -4 46.6662 32.6277   3
   0  -9  -4 60.5381 18.1548   4
   0  -9  -5 40693.9 985.929   4
   0  -9   5 40770.4 946.675   2
   0  -9  -5 41438.0 967.365   3
   0  -9   6 28.4351 21.6654   2
   0  -9  -6 39.0581 37.6177   4
   0  -9  -6 24.8571 31.0552   3
   0  -9   6 20.3686 24.6943   4
   0  -9   7 33292.1 758.509   4
   0  -9  -7 32521.7 832.610   4
   0  -9  -7 32807.0 822.007   3
   0  -9   7 33366.6 776.281   2
   0  -9  -8 67.0432 31.9835   4
   0  -9   8 156.575 25.9456   2
   0  -9   8 111.903 21.3478   4
   0  -9  -8 68.6035 39.9985   3
   0  -9   9 17008.5 414.162   2
   0  -9  -9 15879.9 493.109   3
   0  -9   9 17213.9 405.046   4
   0  -9  -9 17920.6 439.520   5
   0  -9  -9 16870.4 502.021   4
   0  -9  10 62.2908 20.9578   2
   0  -9 -10 57.2353 30.6286   4
   0  -9  10 37.7673 13.6509   4
   0  -9 -10 20.9931 29.1363   3
   0  -9 -11 911.321 95.3730   4
   0  -9 -11 911.908 90.9952   3
   0  -9  11 933.198 48.6299   2
   0  -9 -12 141.632 45.6258   3
   0  -9 -12 114.949 31.6123   4
   0  -9 -13 97.4243 39.0499   3
   0  -9 -13 54.5195 23.7848   4
   0  -9 -14 548.478 89.8538   3
   0  -9 -14 524.934 82.9088   4
   0  -9 -15 5895.97 278.244   4
   0  -9 -15 5404.06 277.114   3
   0  -9 -16 30.9860 57.9385   3
   0  -9 -16 126.905 50.1005   4
   0  -9 -17 5136.40 289.523   3
   0  -9 -17 5426.09 278.031   4
   0  -9 -18 7.86238 45.1925   3
   0  -9 -18 16.3273 53.1627   4
   0  -9 -19 6635.32 323.384   4
   0  -9 -19 5945.81 337.094   3
   0  -9 -20 371.831 104.012   3
   0 -10   0 13254.8 391.738   4
   0  10   0 13853.8 403.103   1
   0 -10   0 13549.2 352.103   3
   0  10  -1 9804.19 316.572   1
   0 -10  -1 9888.86 280.587   3
   0  10   1 9861.48 319.727   1
   0 -10  -1 10343.6 317.090   4
   0 -10   1 9726.00 263.839   3
   0 -10   2 12082.7 300.235   3
   0  10  -2 12026.2 364.876   1
   0 -10  -2 11608.8 362.567   4
   0 -10   2 12099.0 349.119   4
   0 -10  -2 11868.8 333.406   3
   0 -10  -3 4450.32 171.357   3
   0 -10  -3 4492.87 191.586   4
   0 -10   3 4354.83 123.404   3
   0  10  -3 4698.30 190.369   1
   0 -10   3 4508.06 172.451   4
   0 -10   4 3409.43 145.540   2
   0 -10  -4 3466.35 167.535   4
   0 -10  -4 3390.18 148.001   3
   0 -10   4 3259.88 139.048   4
   0 -10   5 444.864 50.3220   2
   0 -10   5 376.191 45.9757   4
   0 -10  -5 460.117 56.4331   3
   0 -10  -5 387.338 56.0201   4
   0 -10   6 330.798 41.6430   2
   0 -10  -6 338.374 57.2039   4
   0 -10   6 331.065 43.7119   4
   0 -10  -6 347.059 46.5157   3
   0 -10  -7 1720.75 119.840   4
   0 -10   7 1796.14 99.3585   2
   0 -10   7 1803.21 90.2058   4
   0 -10  -7 1478.06 106.698   3
   0 -10   8 7307.81 217.734   2
   0 -10  -8 6856.54 272.222   4
   0 -10  -8 6521.95 262.997   3
   0 -10   8 6807.99 206.091   4
   0 -10  -9 4525.25 216.420   4
   0 -10  -9 3844.75 197.528   3
   0 -10   9 4349.94 145.783   2
   0 -10   9 4588.63 145.166   4
   0 -10  -9 4629.57 160.805   5
   0 -10  10 7657.36 202.348   4
   0 -10  10 7492.66 208.825   2
   0 -10 -10 6728.63 283.829   3
   0 -10 -10 7299.36 296.324   4
   0 -10 -11 8914.14 342.382   4
   0 -10 -11 8836.73 338.220   3
   0 -10 -12 9620.87 373.041   3
   0 -10 -12 10358.9 382.742   4
   0 -10 -13 4241.39 228.008   4
   0 -10 -13 4140.87 231.414   3
   0 -10 -14 8962.15 361.178   4
   0 -10 -14 8259.86 355.404   3
   0 -10 -15 1597.02 142.718   4
   0 -10 -15 1324.43 135.270   3
   0 -10 -16 897.004 107.137   4
   0 -10 -16 848.417 111.751   3
   0 -10 -17-2.68616 40.5266   4
   0 -10 -17 50.7598 62.3260   3
   0 -10 -18 339.480 37.8060   4
   0 -10 -18 426.219 79.3480   3
   0 -10 -19 832.716 105.909   4
   0 -10 -19 844.613 137.481   3
   0  11   0 31.7958 27.8649   1
   0 -11   0 21.6187 12.3353   3
   0 -11   0 24.8282 19.4579   4
   0  11  -1 142.180 38.8166   1
   0 -11  -1 180.755 35.4241   3
   0 -11   1 119.363 34.5668   4
   0 -11  -1 119.095 19.5955   4
   0  11   1 175.733 35.0045   1
   0 -11   1 144.922 27.8337   3
   0 -11  -2 6449.91 221.935   3
   0 -11   2 7001.52 191.669   3
   0 -11  -2 6816.12 253.696   4
   0  11  -2 6557.90 250.153   1
   0  11   2 6627.32 256.350   1
   0 -11   2 6507.93 238.665   4
   0 -11   3 14.2386 15.5201   4
   0 -11  -3 22.2739 15.7881   4
   0 -11  -3 16.0985 20.8473   3
   0  11  -3 32.5622 30.1095   1
   0 -11   3 44.4320 35.1505   2
   0 -11   3 21.1631 7.13919   3
   0 -11  -4 14104.3 408.240   3
   0 -11   4 14302.0 398.271   4
   0 -11   4 14281.6 406.231   2
   0 -11  -4 13952.1 433.188   4
   0 -11   5 906.042 74.6869   2
   0 -11  -5 988.965 87.1015   4
   0 -11   5 867.745 67.8712   4
   0 -11  -5 846.361 76.6649   3
   0 -11   6 22875.1 601.809   2
   0 -11   6 24010.9 582.607   4
   0 -11  -6 22225.5 615.129   3
   0 -11  -6 23205.1 642.874   4
   0 -11  -7 850.404 82.7513   3
   0 -11   7 895.885 76.2792   2
   0 -11  -7 797.909 88.3099   4
   0 -11   7 896.118 67.3642   4
   0 -11   8 13653.7 359.594   4
   0 -11  -8 13316.9 438.462   4
   0 -11  -8 12897.1 421.266   3
   0 -11   8 13667.0 370.832   2
   0 -11  -9 31.5949 20.5486   5
   0 -11  -9 19.2248 37.2919   3
   0 -11   9 61.4448 24.2268   4
   0 -11  -9 10.4801 38.9348   4
   0 -11   9 41.6417 15.9785   2
   0 -11 -10 3730.79 204.664   4
   0 -11 -10 3371.13 191.684   3
   0 -11 -11 185.747 57.3179   3
   0 -11 -11 92.7659 23.1583   4
   0 -11 -12 169.478 48.1815   3
   0 -11 -12 167.322 45.7141   4
   0 -11 -13 314.116 71.0357   3
   0 -11 -13 238.670 51.5293   4
   0 -11 -14 3302.16 212.350   3
   0 -11 -14 3144.21 206.413   4
   0 -11 -15 2614.32 190.232   4
   0 -11 -15 2560.60 193.160   3
   0 -11 -16 7236.95 344.322   4
   0 -11 -16 7042.79 351.068   3
   0 -11 -17 1832.21 178.789   3
   0 -11 -17 1954.58 170.978   4
   0 -11 -18 7398.64 386.507   3
   0 -11 -18 8580.56 392.082   4
   0 -11 -19 942.268 158.791   3
   0 -11 -19 979.861 127.042   4
   0  12   0 338.383 55.0539   1
   0 -12   0 403.585 49.4125   3
   0 -12   0 330.928 63.0092   4
   0 -12  -1 23640.4 581.783   3
   0 -12   1 23510.2 559.689   3
   0  12   1 22922.2 633.812   1
   0 -12  -1 21531.7 620.624   4
   0  12  -1 23151.8 634.429   1
   0 -12   1 22684.1 616.343   4
   0 -12   2 195.419 30.1200   3
   0 -12  -2 169.682 47.6089   4
   0  12  -2 170.712 24.9609   1
   0 -12   2 130.857 44.6855   4
   0 -12  -2 124.777 35.7077   3
   0  12   2 127.700 41.9067   1
   0 -12  -3 16954.8 445.246   3
   0 -12   3 16418.6 449.530   2
   0 -12   3 16971.2 453.664   4
   0 -12   3 14065.6 368.824   3
   0 -12  -3 16517.9 479.586   4
   0 -12   4 369.769 48.0786   4
   0 -12  -4 346.818 59.0199   4
   0 -12   4 321.173 53.1893   2
   0 -12  -4 385.495 61.9146   3
   0 -12   5 1297.89 87.8098   4
   0 -12  -5 1419.74 104.412   3
   0 -12   5 1390.53 99.0614   2
   0 -12  -5 1454.73 112.649   4
   0 -12   6 2521.73 123.947   4
   0 -12   6 2393.77 135.592   2
   0 -12  -6 2127.54 140.088   4
   0 -12  -6 2267.96 139.982   3
   0 -12   7 71.6375 35.9978   4
   0 -12  -7 85.3184 45.2500   3
   0 -12  -7 56.8713 31.6868   4
   0 -12   7 51.7922 37.5041   2
   0 -12   8 4996.26 177.823   4
   0 -12  -8 4364.52 229.612   4
   0 -12  -8 4565.99 219.913   3
   0 -12   8 4890.56 186.015   2
   0 -12  -9 1503.12 127.280   4
   0 -12  -9 1633.21 126.111   3
   0 -12 -10 9041.34 351.408   3
   0 -12 -10 9578.87 370.101   4
   0 -12 -11 4890.86 255.801   4
   0 -12 -11 4657.82 242.433   3
   0 -12 -12 2366.29 176.372   3
   0 -12 -12 2724.82 186.297   4
   0 -12 -13 6601.33 313.968   3
   0 -12 -13 6910.68 325.835   4
   0 -12 -14 1963.74 163.278   4
   0 -12 -14 1603.76 151.088   3
   0 -12 -15 2438.69 190.386   4
   0 -12 -15 2102.81 187.793   3
   0 -12 -16 166.521 54.4342   4
   0 -12 -16 203.251 73.3717   3
   0 -12 -17 449.596 97.7044   3
   0 -12 -17 614.253 118.203   4
   0 -12 -18 108.495 37.3878   4
   0 -12 -18 97.2196 67.5402   3
   0 -13   0-14.3588 34.0047   4
   0 -13   0 24.8992 24.4248   3
   0  13   0 37.8373 36.4619   1
   0  13   1 3001.58 172.711   1
   0 -13  -1 3006.92 169.097   4
   0 -13   1 3108.70 166.348   4
   0 -13   1 3432.84 132.571   3
   0  13  -1 3236.72 175.199   1
   0 -13  -1 3282.09 146.964   3
   0 -13   2 327.345 51.9622   4
   0  13   2 347.453 64.2121   1
   0  13  -2 336.077 51.4040   1
   0 -13  -2 287.667 33.8803   4
   0 -13  -2 365.594 51.3388   3
   0 -13  -3 5994.54 260.076   4
   0 -13   3 6019.76 236.496   2
   0  13   3 5884.96 261.450   1
   0 -13   3 5806.93 235.005   4
   0 -13  -3 6384.94 236.628   3
   0 -13   4 1563.05 107.247   4
   0 -13  -4 1857.86 119.675   3
   0 -13   4 1747.41 121.121   2
   0 -13  -4 1698.29 129.517   4
   0 -13  -5 10119.7 364.664   4
   0 -13  -5 10046.0 337.474   3
   0 -13   5 9578.21 315.929   4
   0 -13   5 9314.49 324.807   2
   0 -13   6 667.885 71.5214   2
   0 -13   6 699.370 68.2931   4
   0 -13  -6 699.273 78.9432   3
   0 -13  -6 690.691 82.5275   4
   0 -13  -7 9674.88 376.933   4
   0 -13  -7 9633.63 353.824   3
   0 -13   7 10268.0 344.126   2
   0 -13   7 10649.7 321.051   4
   0 -13  -8 546.876 76.9366   3
   0 -13  -8 534.587 81.7953   4
   0 -13  -9 2780.83 173.663   3
   0 -13  -9 2915.96 189.047   4
   0 -13 -10 62.1894 34.1974   3
   0 -13 -10 86.6867 46.5945   4
   0 -13 -11 78.3112 35.4514   4
   0 -13 -11 2.46779 22.8415   3
   0 -13 -12 927.898 107.368   4
   0 -13 -12 868.077 110.857   3
   0 -13 -13 2652.47 199.823   4
   0 -13 -13 2725.59 199.662   3
   0 -13 -14 3844.97 247.867   3
   0 -13 -14 4227.86 261.008   4
   0 -13 -15 6246.71 329.593   4
   0 -13 -15 5506.20 311.456   3
   0 -13 -16 4231.42 282.790   3
   0 -13 -16 5435.35 312.264   4
   0 -13 -17 7440.94 399.321   3
   0 -13 -17 9370.80 431.158   4
   0  14   0 30759.0 843.609   1
   0 -14   0 29469.8 827.485   4
   0 -14   0 33325.0 771.644   3
   0 -14  -1 969.979 101.843   4
   0  14   1 969.700 95.4356   1
   0  14  -1 984.229 102.626   1
   0 -14   1 1118.36 102.930   4
   0 -14  -1 1084.96 93.9658   3
   0  14   2 16425.3 531.690   1
   0 -14   2 17083.6 511.406   4
   0  14  -2 16830.0 528.543   1
   0 -14  -2 18856.5 494.267   3
   0 -14  -2 16436.0 526.310   4
   0 -14   2 16238.4 503.453   2
   0  14   3-13.1349 26.8744   1
   0 -14  -3 25.7125 47.8119   3
   0 -14  -3 54.0350 27.5163   4
   0 -14   3 32.3757 46.1764   2
   0 -14   3-20.0869 17.4578   4
   0  14   4 2594.26 173.994   1
   0 -14   4 2594.12 154.954   2
   0 -14   4 2521.70 146.420   4
   0 -14  -4 2731.24 170.944   4
   0 -14  -4 2633.63 148.796   3
   0 -14   5 501.148 61.1777   4
   0 -14  -5 484.190 66.5363   3
   0 -14   5 392.307 53.0012   2
   0 -14  -5 430.873 66.6968   4
   0 -14   6 128.918 31.8624   4
   0 -14  -6 133.458 25.3991   4
   0 -14  -6 180.711 39.0074   3
   0 -14   6 85.1691 38.1744   2
   0 -14   7 1167.19 90.0343   4
   0 -14  -7 1150.70 110.871   4
   0 -14  -7 1043.51 104.617   3
   0 -14  -8 408.503 73.6541   3
   0 -14  -8 528.661 82.4055   4
   0 -14  -9 1623.70 141.071   4
   0 -14  -9 1454.03 126.353   3
   0 -14 -10 5820.84 299.669   4
   0 -14 -10 5405.23 275.936   3
   0 -14 -11 1126.71 121.077   3
   0 -14 -11 1144.81 131.547   4
   0 -14 -12 5503.51 295.422   3
   0 -14 -12 6359.87 324.217   4
   0 -14 -13 948.891 122.475   4
   0 -14 -13 941.008 122.942   3
   0 -14 -14 6895.56 356.730   4
   0 -14 -14 6187.64 330.805   3
   0 -14 -15 1016.34 145.051   3
   0 -14 -15 999.231 137.460   4
   0 -15   0 48.6329 46.3924   4
   0  15   0 24.6612 31.8142   1
   0  15  -1 14.9466 39.6050   1
   0 -15   1 50.9099 39.1300   4
   0  15   1 47.8755 21.8158   1
   0 -15  -1 37.9066 29.3594   4
   0 -15  -2 3195.23 195.566   4
   0 -15   2 3916.11 203.008   4
   0 -15   2 3845.10 197.807   2
   0  15   2 3727.28 213.857   1
   0 -15   3 660.145 78.0857   4
   0 -15  -3 722.947 80.6747   3
   0  15   3 701.364 85.7685   1
   0 -15   3 713.142 83.9005   2
   0 -15  -3 616.469 79.7663   4
   0  15   4 4865.70 262.189   1
   0 -15   4 6116.93 251.335   4
   0 -15   4 5283.20 246.983   2
   0 -15  -4 5243.12 268.191   4
   0 -15  -4 6318.35 260.311   3
   0  15   5 4855.66 262.640   1
   0 -15   5 5105.27 226.828   4
   0 -15  -5 5470.96 248.185   3
   0 -15  -5 4818.51 259.104   4
   0 -15  -6 9263.77 389.465   4
   0 -15   6 10283.1 348.874   4
   0 -15  -6 10479.1 381.865   3
   0 -15  -7 4789.95 263.290   4
   0 -15  -7 4786.09 248.480   3
   0 -15  -8 7136.52 317.744   3
   0 -15  -8 7254.15 339.586   4
   0 -15  -9 793.743 112.165   4
   0 -15  -9 678.586 97.8081   3
   0 -15 -10 947.536 124.236   4
   0 -15 -10 919.403 113.519   3
   0 -15 -11 49.3050 37.9443   4
   0 -15 -11 46.6910 40.2459   3
   0 -15 -12 820.498 108.265   3
   0 -15 -12 848.462 116.511   4
   0 -15 -13 601.797 93.1982   3
   0 -15 -13 701.447 92.5114   4
   0 -15 -14 3316.14 238.220   3
   0  16   0 152.108 46.0208   1
   0 -16   0 103.322 54.5758   4
   0  16  -1 17510.1 566.264   1
   0 -16   1 16703.6 542.007   2
   0 -16  -1 15761.7 546.706   4
   0  16   1 18153.4 572.603   1
   0 -16   1 17326.1 549.655   4
   0 -16  -2 65.8975 25.0295   4
   0 -16   2 82.0552 40.1375   2
   0 -16   2 94.7940 55.3619   4
   0  16   2 173.015 61.6440   1
   0 -16   3 9064.68 346.957   4
   0 -16  -3 8238.63 357.570   4
   0 -16   3 8623.63 345.771   2
   0  16   3 9005.70 375.159   1
   0  16   4 190.331 60.5510   1
   0 -16   4 165.602 57.7128   4
   0 -16  -4 158.015 49.0545   4
   0 -16  -5 1664.69 131.375   3
   0 -16  -5 1700.67 146.915   4
   0  16   5 1910.62 167.626   1
   0  16   6 279.727 64.6124   1
   0 -16  -6 312.957 71.9063   3
   0 -16  -6 224.153 54.6035   4
   0 -16  -7 478.286 65.1743   3
   0 -16  -7 524.982 96.1386   4
   0  16   7 472.880 85.2646   1
   0 -16  -8 50.3757 42.3032   3
   0 -16  -8-38.3929 46.5167   4
   0 -16  -9 5536.24 311.200   4
   0 -16  -9 5465.65 285.775   3
   0 -16 -10 74.1609 87.2391   4
   0 -16 -10 88.5326 46.8354   3
   0 -16 -11 8254.80 385.911   3
   0 -16 -11 9321.49 430.378   4
   0 -16 -12 114.628 53.0822   3
   0 -16 -13 6069.47 337.814   3
   0  17   0 0.82867 34.0879   1
   0 -17   0 13.7956 44.5748   4
   0 -17   0-99.8737 60.7575   2
   0  17   1 1389.47 138.309   1
   0 -17   1 1474.11 142.116   4
   0 -17   1 1258.01 121.687   2
   0 -17  -1 1377.15 137.963   4
   0  17   2 502.358 84.5742   1
   0 -17  -2 459.063 86.8668   4
   0 -17   2 605.916 101.316   4
   0 -17   3 3222.37 198.523   4
   0  17   3 3416.17 223.928   1
   0 -17  -3 3378.01 222.552   4
   0  17   4 5437.43 286.134   1
   0 -17  -4 4899.05 277.541   4
   0 -17  -5 3689.35 241.115   4
   0  17   5 3307.87 225.549   1
   0  17   6 6293.01 328.213   1
   0 -17  -6 6489.78 332.403   4
   0  17   7 4065.03 255.027   1
   0 -17  -7 4606.06 279.626   4
   0 -17  -8 4197.46 267.059   4
   0  17   8 4199.52 271.635   1
   0 -17  -9 1977.76 174.755   3
   0 -17 -10 890.080 114.689   3
   0 -17 -11 35.5390 45.3959   3
   0 -17 -12 222.939 69.9137   3
   0  18   0 19169.7 641.901   1
   0 -18   0 18570.0 629.579   4
   0 -18  -1 4.35483 45.3692   2
   0 -18   1 78.3069 71.1106   4
   0  18   1 50.5694 36.8250   1
   0 -18  -1 143.044 63.2328   4
   0  18   2 11011.1 454.960   1
   0 -18   2 11419.0 440.571   4
   0 -18  -2 10985.6 452.262   4
   0  18   3 341.083 88.0950   1
   0 -18  -3 346.488 87.8969   4
   0  18   4 5068.08 291.231   1
   0 -18  -4 4947.52 289.600   4
   0 -18  -5 313.057 65.4687   4
   0  18   6 309.293 65.5626   1
   0  18   7 667.785 91.8595   1
   0 -19   0 69.7105 30.6024   4
   0 -19  -1 164.210 70.9239   4
   0  19   1 88.2979 78.8942   1
   0  19   2 310.968 43.4916   1
   0 -19  -2 390.318 88.9982   2
   0  19   3 2192.38 195.079   1
   0  19   4 2173.75 197.141   1
   1   0 -24 6.49641 46.8470   3
   1   0 -23 11.1475 62.6156   3
   1   0 -22 944.466 112.887   3
   1   0 -21 81.6773 35.9754   3
   1   0 -20 9557.88 368.208   3
   1   0 -19-9.58501 27.0085   3
   1   0 -18 5765.19 251.822   3
   1   0 -17 29.0129 17.1480   3
   1   0 -16 2255.83 135.051   3
   1   0 -15 17.4735 21.5061   3
   1   0 -14 1451.66 97.9679   3
   1   0 -13 36.4068 31.1024   3
   1   0 -12 3886.89 158.712   3
   1   0 -11 15.6134 21.8690   3
   1   0 -10 51059.3 1119.09   2
   1   0 -10 48748.0 1127.57   3
   1   0  -9 8.05564 13.8497   3
   1   0  -9 15.7873 16.3823   2
  -1   0   9 12.3314 11.2876   4
  -1   0   8 47403.0 1038.49   5
  -1   0   8 43323.6 1010.95   4
   1   0  -8 47679.3 1045.35   3
   1   0  -8 45922.0 1037.30   2
   1   0  -7 3.58935 10.8541   3
  -1   0   7 10.5502 13.8979   5
  -1   0   7 16.1389 12.6705   4
   1   0  -7 8.61784 13.5234   2
   1   0  -6 72333.2 1455.74   2
  -1   0   6 69948.3 1453.27   5
  -1   0   6 70512.4 1437.31   4
   1   0  -6 72567.8 1460.15   3
  -1   0   5 23.9994 12.1783   4
  -1   0   5 7.78051 12.0816   2
   1   0  -5 1.73534 13.7473   2
  -1   0   5-2.14694 7.36878   5
   1   0  -4 55827.5 1197.89   2
  -1   0   4 55998.5 1197.99   2
   1   0  -3 7.94029 6.04376   2
  -1   0   3 4.57893 6.90473   2
   1   0  -3-6.67977 7.87181   5
   1   0  -2 36.7957 9.56050   2
  -1   0   2 58.8200 10.3142   2
   1   0  -1 28.3296 6.30784   2
  -1   0   1 20.3732 4.85547   2
   1   0   0 19139.0 422.495   3
  -1   0   0 19333.3 421.954   3
  -1   0  -1 5.61312 7.06070   3
   1   0   1-8.03513 4.72629   3
  -1   0  -2 46546.6 967.309   3
   1   0   2 44052.4 964.782   3
  -1   0  -3 8.07445 8.10553   3
   1   0   3 11.3073 8.30336   3
  -1   0  -4 118698. 2460.82   3
   1   0   4 114076. 2457.40   3
  -1   0  -5 4.43834 11.0391   3
   1   0   5 19.0511 7.83477   3
  -1   0  -6 88395.1 1898.03   3
   1   0   6 88510.3 1894.17   3
   1   0   7 11.4918 10.5268   3
  -1   0  -7 10.9297 8.16347   4
  -1   0  -7 69.7512 30.9607   3
  -1   0  -8 86438.2 1107.54   4
  -1   0  -8 87825.4 1172.02   3
  -1   0  -9 0.94373 20.7264   2
  -1   0  -9 20.8047 30.6540   3
   1   0   9 14.2094 21.6380   3
  -1   0  -9 1.26882 9.30190   4
  -1   0 -10 11357.0 281.091   4
  -1   0 -10 11340.5 302.411   2
  -1   0 -10 10870.0 318.333   3
  -1   0 -11-1.63341 6.85857   4
  -1   0 -11 17.8807 26.8296   3
  -1   0 -11 3.40908 13.9788   2
  -1   0 -12 90.6808 23.0664   3
  -1   0 -13-16.9443 25.7633   3
  -1   0 -14 7412.48 270.796   3
  -1   0 -15 24.6104 16.5403   3
  -1   0 -16 2971.93 168.189   3
  -1   0 -17 44.2405 24.6631   3
  -1   0 -18 3537.63 195.529   3
  -1   0 -19-1.76097 44.0830   3
  -1   0 -20 330.855 68.5801   3
  -1   0 -21-8.93549 39.4831   3
  -1   0 -22 539.354 82.6864   3
  -1   0 -23 70.0786 44.8014   3
  -1   0 -24 5376.51 311.229   3
   1  -1 -25 3943.05 261.796   3
   1  -1 -24 5835.90 320.426   3
   1   1 -23 6734.71 314.166   3
   1  -1 -23 6389.81 320.442   3
   1  -1 -22 3343.60 213.750   3
   1   1 -22 3568.32 209.851   3
   1   1 -21 4750.98 240.111   3
   1  -1 -21 4378.30 247.730   3
   1   1 -20 806.686 87.8712   3
   1  -1 -20 824.435 92.4270   3
   1   1 -19 213.913 39.8188   3
   1  -1 -19 159.396 46.7948   3
   1   1 -18 4.17492 35.9246   3
   1  -1 -18 53.6682 32.7116   3
   1   1 -17 3766.06 183.333   3
   1  -1 -17 3794.43 193.647   3
   1   1 -16 6046.00 234.933   3
   1  -1 -16 5994.07 247.601   3
   1   1 -15 4733.29 194.990   3
   1  -1 -15 4873.06 211.066   3
   1  -1 -14 14226.7 426.153   3
   1   1 -14 14313.3 406.342   3
   1   1 -13 13773.6 389.687   3
   1  -1 -13 14139.9 409.601   3
   1   1 -12 19561.1 497.816   3
   1  -1 -12 19110.7 514.548   3
   1   1 -11 27718.3 675.003   3
   1  -1 -11 28036.3 696.248   3
   1   1 -11 29138.9 669.999   2
  -1  -1  10 16853.1 381.549   4
   1   1 -10 18003.2 421.708   3
   1  -1 -10 17742.2 439.603   3
   1   1 -10 18761.8 420.160   2
  -1  -1   9 3607.82 107.921   4
   1   1  -9 3787.98 132.722   3
   1   1  -9 4068.43 132.731   2
   1  -1  -9 3510.45 139.504   2
   1  -1  -9 3947.64 146.098   3
   1   1  -8 4892.07 150.996   2
  -1  -1   8 4727.39 129.762   4
  -1  -1   8 4483.55 148.210   2
   1  -1  -8 5377.72 163.696   2
   1  -1  -8 5091.31 166.743   3
   1   1  -8 4981.95 152.651   3
  -1  -1   7 36.4768 11.4456   4
   1  -1  -7 15.1500 20.4051   2
   1   1  -7 37.5351 19.6435   2
  -1   1   7 20.1559 13.5925   4
   1   1  -7 25.5222 11.4987   3
  -1  -1   7 6.72113 12.7997   2
   1  -1  -7 33.5902 10.4267   4
   1  -1  -7 44.8183 18.8279   3
   1   1  -6 166.382 20.1679   3
  -1   1   6 107.044 16.6385   4
  -1  -1   6 112.130 18.4471   2
   1  -1  -6 148.081 20.1461   4
   1  -1  -6 152.137 21.4159   3
   1   1  -6 70.2043 16.3872   2
   1  -1  -6 223.521 23.7901   2
   1   1  -5 3752.45 113.148   2
  -1  -1   5 3377.57 112.170   2
   1  -1  -5 4331.09 118.721   5
   1  -1  -5 4081.32 111.767   4
  -1   1   5 4174.89 109.358   4
  -1   1   4 414.172 24.9574   4
  -1  -1   4 370.555 27.6233   2
   1  -1  -4 240.909 26.6740   2
   1  -1  -4 346.470 27.3498   4
   1   1  -4 423.382 25.2421   2
   1  -1  -3 5863.50 149.458   2
  -1   1   3 5581.29 145.369   4
  -1  -1   3 5712.73 145.501   2
   1  -1  -3 5417.97 145.120   4
  -1   1   3 5943.41 148.749   2
   1   1  -3 5648.02 146.252   2
   1   1  -2 12210.9 277.133   2
  -1  -1   2 13187.4 276.891   2
  -1  -1   2 12423.4 266.661   5
  -1   1   2 11009.0 274.794   2
   1  -1  -2 10546.9 275.560   2
  -1   1   2 12516.8 272.063   4
   1   1  -1 43031.3 962.892   2
  -1   1   1 46034.9 958.278   4
  -1  -1   1 45624.1 965.577   2
   1   1  -1 43844.8 949.448   5
  -1   1   1 48791.0 958.433   2
   1  -1  -1 44173.6 957.903   2
   1   1   0 19046.8 411.431   3
  -1  -1   0 18778.9 411.980   3
  -1   1   0 19379.8 414.766   1
   1  -1   0 18681.0 414.932   1
   1   1   1 28251.8 594.863   3
   1  -1   1 27678.4 594.987   3
  -1   1  -1 26293.7 597.824   3
  -1  -1  -1 27720.2 595.856   3
  -1   1  -2 335.014 20.0152   3
   1  -1   2 267.072 18.7620   3
  -1  -1  -2 318.317 22.2852   3
   1   1   2 332.257 21.4471   3
   1   1   3 56.2042 16.5930   3
   1  -1   3 64.3048 11.3639   3
  -1  -1  -3 54.6335 12.2837   3
  -1   1  -3 92.1715 14.6651   3
   1  -1   4 11203.3 247.271   3
  -1   1  -4 8938.47 228.890   2
  -1  -1  -4 11210.5 258.755   3
  -1   1  -4 11148.2 250.426   3
   1   1   4 10860.4 256.253   3
  -1  -1  -5 24930.6 555.898   3
  -1   1  -5 24781.3 544.325   3
   1   1   5 23691.2 551.539   3
  -1   1  -5 21876.7 524.453   2
   1  -1   5 23879.1 540.194   3
  -1   1  -5 24938.3 514.611   4
  -1   1  -6 14980.8 325.640   4
  -1   1  -6 14649.6 339.688   2
   1  -1   6 14801.6 354.136   3
   1   1   6 14932.5 363.799   3
  -1  -1  -6 14584.6 367.326   3
  -1   1  -6 14718.4 356.598   3
  -1  -1  -7 13339.0 343.899   3
  -1   1  -7 12916.2 331.083   3
   1  -1   7 12451.6 325.436   3
   1   1   7 13749.0 340.055   3
  -1   1  -7 13733.8 315.414   2
  -1   1  -7 13340.5 297.957   4
  -1  -1  -8 11506.6 280.456   4
  -1   1  -8 11230.4 295.061   3
   1   1   8 11053.8 297.761   3
  -1  -1  -8 10803.5 303.869   3
  -1   1  -8 10546.4 273.229   2
   1  -1   8 11215.9 288.808   3
  -1   1  -8 11193.5 256.851   4
  -1   1  -9 29486.5 703.975   3
  -1  -1  -9 28881.1 716.431   3
  -1  -1  -9 29786.6 682.759   4
   1  -1   9 30632.0 697.564   3
  -1   1  -9 31501.8 686.111   2
  -1   1 -10 24544.6 529.770   2
  -1  -1 -10 23252.2 568.331   3
  -1   1 -10 22705.9 551.036   3
  -1  -1 -10 23551.9 526.274   4
   1  -1  10 23923.5 544.542   3
  -1  -1 -11 32745.0 762.900   4
  -1   1 -11 32596.6 793.955   3
  -1   1 -11 35782.7 769.995   2
  -1  -1 -11 31974.8 808.544   3
  -1  -1 -12 10521.1 340.320   3
  -1  -1 -12 11169.5 298.478   4
  -1   1 -12 11709.7 303.358   2
  -1   1 -12 10599.4 326.390   3
  -1   1 -13 14269.0 410.092   3
  -1  -1 -13 14572.8 429.607   3
  -1   1 -13 13839.6 382.426   2
  -1  -1 -13 14711.7 374.433   4
  -1   1 -14 2386.83 134.810   3
  -1  -1 -14 2638.65 147.824   3
  -1  -1 -15 2960.62 162.361   3
  -1   1 -15 2795.36 152.258   3
  -1  -1 -16 56.4104 34.7083   3
  -1   1 -16 62.4130 36.7447   3
  -1  -1 -17 137.956 47.7507   3
  -1   1 -17 44.1595 25.4027   3
  -1   1 -18 4215.81 213.374   3
  -1  -1 -18 4056.50 219.972   3
  -1   1 -19 4118.07 215.307   3
  -1  -1 -19 3933.67 221.680   3
  -1   1 -20 5399.15 260.343   3
  -1  -1 -20 5029.20 265.332   3
  -1  -1 -21 3303.75 212.748   3
  -1   1 -21 3236.56 205.240   3
  -1  -1 -22 5130.63 283.110   3
  -1   1 -22 5624.94 288.139   3
  -1   1 -23 5410.44 290.958   3
  -1  -1 -23 5223.27 293.891   3
  -1  -1 -24 2766.44 209.270   3
  -1  -1 -25 845.561 112.895   3
   1  -2 -25 1585.60 164.284   3
   1  -2 -24 130.692 30.9971   3
   1  -2 -23 403.302 73.7072   3
   1   2 -22 237.712 61.8856   3
   1  -2 -22 195.663 53.5950   3
   1  -2 -21 6991.79 330.668   3
   1   2 -21 7527.48 309.112   3
   1  -2 -20 1723.20 144.556   3
   1   2 -20 1858.22 136.622   3
   1  -2 -19 11023.9 419.130   3
   1   2 -19 12135.3 396.148   3
   1   2 -18 518.514 71.8274   3
   1  -2 -18 486.194 69.9993   3
   1   2 -17 10436.0 341.352   3
   1  -2 -17 9937.98 366.842   3
   1   2 -16 2519.44 135.302   3
   1  -2 -16 2400.95 148.840   3
   1   2 -15 2195.47 120.070   3
   1  -2 -15 1974.61 127.193   3
   1   2 -14 1179.40 79.9339   3
   1  -2 -14 1330.68 99.6158   3
   1  -2 -13 451.285 59.7580   3
   1   2 -13 472.705 48.7673   3
   1  -2 -12 184.571 37.5917   3
   1   2 -12 184.486 34.3282   3
   1   2 -12 182.722 33.5041   2
   1   2 -11 11385.7 312.460   3
   1   2 -11 11763.9 313.029   2
   1  -2 -11 11712.8 349.191   3
  -1  -2  10 149.915 26.9376   2
   1  -2 -10 159.537 34.7012   3
  -1  -2  10 118.385 15.6509   4
   1  -2 -10 168.326 28.7902   4
   1   2 -10 149.874 23.6945   2
   1   2 -10 126.651 24.4869   3
   1   2  -9 30625.2 703.799   3
   1  -2  -9 32411.5 744.730   3
   1   2  -9 32246.8 709.609   2
   1  -2  -9 30292.3 712.721   4
   1  -2  -9 31072.3 733.900   2
  -1  -2   9 30161.5 706.304   2
  -1  -2   9 30897.3 674.268   4
  -1  -2   8 7699.61 209.560   2
   1  -2  -8 6765.10 222.602   2
   1   2  -8 7747.32 207.445   3
   1   2  -8 8496.99 215.647   2
   1  -2  -8 8165.34 238.917   3
  -1  -2   8 7925.61 187.435   4
   1  -2  -8 6922.66 213.200   4
  -1  -2   7 83538.3 1706.83   2
   1   2  -7 79715.8 1698.80   3
   1  -2  -7 77132.4 1712.46   4
   1   2  -7 81772.6 1708.22   2
   1  -2  -7 73916.4 1723.13   2
   1  -2  -7 79692.6 1733.75   3
  -1  -2   6 167.074 21.2133   2
   1  -2  -6 181.756 29.6081   3
   1  -2  -6 145.461 28.9807   2
   1   2  -6 183.642 18.6009   3
   1  -2  -6 156.752 22.5349   4
   1  -2  -6 209.577 22.4500   5
   1   2  -6 209.482 22.4015   2
   1   2  -5 10291.1 224.493   3
  -1   2   5 9263.68 236.208   4
   1   2  -5 9790.34 240.801   2
   1  -2  -5 9468.02 240.082   4
  -1  -2   5 9600.02 233.590   2
   1  -2  -5 7855.46 240.337   2
   1  -2  -4 5293.18 147.066   4
  -1   2   4 4635.97 144.871   4
   1   2  -4 5924.09 151.714   2
  -1  -2   4 5800.42 147.407   2
   1  -2  -4 5509.53 154.839   2
   1   2  -3 20699.2 472.794   2
  -1   2   3 20815.0 464.730   4
  -1  -2   3 22238.1 471.392   2
   1  -2  -3 20126.2 465.188   4
   1   2  -2 3708.74 113.261   2
   1  -2  -2 4240.66 111.253   4
  -1   2   2 4078.41 110.218   4
  -1  -2   2 4066.21 118.611   2
  -1  -2   2 4132.37 98.8906   1
   1  -2  -1 3377.17 88.5810   4
  -1  -2   1 3232.41 92.3565   2
  -1   2   1 3252.83 89.4083   4
   1   2  -1 2935.97 80.4867   3
  -1  -2   1 3379.59 82.0080   3
   1  -2   0 8642.24 206.676   1
  -1   2   0 8255.58 196.913   4
   1  -2   0 8688.81 197.525   4
   1   2   0 8284.51 195.936   3
  -1  -2   0 8556.58 197.580   3
  -1   2   0 9036.58 207.366   1
   1  -2   1 15768.3 358.355   1
   1   2   1 14906.3 349.102   3
   1  -2   1 17042.3 339.924   4
  -1   2  -1 16636.8 339.735   4
  -1  -2  -1 17112.5 351.946   3
   1  -2   1 15293.5 344.149   3
  -1   2  -2 588.552 20.4159   4
  -1  -2  -2 601.166 31.8023   3
   1  -2   2 614.301 27.4307   3
   1   2   2 426.889 31.3086   3
  -1   2  -2 458.043 28.8439   3
   1   2   3 54583.8 1168.99   3
  -1  -2  -3 53838.2 1172.66   3
   1   2   3 51520.8 1146.50   5
  -1   2  -3 56417.8 1157.59   3
   1  -2   3 55986.9 1152.23   3
  -1  -2  -4 852.846 48.5708   3
   1  -2   4 926.368 38.6185   3
   1   2   4 828.879 37.5809   5
  -1   2  -4 963.585 41.5942   3
   1   2   4 922.989 48.6424   3
  -1   2  -5 45516.3 931.703   3
  -1  -2  -5 42018.8 952.112   3
   1   2   5 39451.8 922.027   5
   1   2   5 43974.4 948.442   3
   1  -2   5 41502.3 923.538   3
  -1   2  -5 39272.6 908.364   2
  -1  -2  -6 16.3399 21.9123   3
  -1   2  -6 23.2675 8.96354   3
  -1   2  -6 14.5379 8.11804   2
   1   2   6 26.7955 16.2836   3
   1  -2   6 6.15125 7.42574   3
   1   2   6 15.9234 10.0088   5
   1  -2   7 49490.4 1111.55   3
  -1   2  -7 50099.5 1094.43   2
   1   2   7 52195.9 1113.15   5
  -1  -2  -7 51082.6 1146.32   3
   1   2   7 53629.0 1138.78   3
  -1   2  -7 51794.3 1118.53   3
  -1  -2  -8 525.784 41.9967   4
  -1   2  -8 476.158 32.0942   2
  -1  -2  -8 577.707 54.8464   3
   1   2   8 427.456 39.4509   5
   1  -2   8 538.191 39.3833   3
  -1   2  -8 536.472 42.2439   3
  -1  -2  -9 4431.86 147.745   4
   1  -2   9 4650.15 144.968   3
  -1   2  -9 4527.04 130.098   2
  -1  -2  -9 4482.40 168.699   3
   1   2   9 3712.44 142.192   5
  -1   2  -9 4461.69 149.287   3
  -1  -2 -10 3438.05 128.974   4
   1  -2  10 3423.91 125.594   3
  -1   2 -10 3414.68 113.402   2
  -1   2 -10 3386.80 131.218   3
  -1  -2 -10 3371.10 150.726   3
  -1   2 -11 128.028 25.2662   3
  -1  -2 -11 166.244 38.1713   3
  -1  -2 -11 154.575 27.3640   4
  -1   2 -11 117.346 20.0026   2
  -1   2 -12 2243.67 111.311   3
  -1   2 -12 2261.08 94.2233   2
  -1  -2 -12 2109.45 101.946   4
  -1  -2 -12 2213.09 125.616   3
  -1   2 -13 12058.1 354.191   3
  -1  -2 -13 12187.0 337.862   4
  -1   2 -13 12245.6 323.010   2
  -1  -2 -13 11836.8 382.656   3
  -1  -2 -14 1508.29 87.9673   4
  -1  -2 -14 1584.05 120.458   3
  -1   2 -14 1515.71 100.993   3
  -1   2 -14 1401.40 81.4670   2
  -1  -2 -15 14213.1 391.815   4
  -1  -2 -15 14246.8 452.577   3
  -1   2 -15 13831.5 416.273   3
  -1   2 -16 6310.21 250.558   3
  -1  -2 -16 6441.27 276.088   3
  -1  -2 -17 7330.82 313.176   3
  -1   2 -17 7705.87 292.206   3
  -1  -2 -18 1197.05 112.952   3
  -1   2 -18 1161.67 106.665   3
  -1   2 -19 2560.50 164.060   3
  -1  -2 -19 2642.00 178.907   3
  -1  -2 -20 79.7759 37.3959   3
  -1   2 -20 178.448 64.8736   3
  -1  -2 -21 76.5013 28.5086   3
  -1   2 -21 119.605 32.5192   3
  -1   2 -22 145.850 29.1499   3
  -1  -2 -22 250.875 54.4619   3
  -1  -2 -23 836.934 120.697   3
  -1  -2 -24 260.508 55.6558   3
   1  -3 -25 2480.31 216.340   3
   1  -3 -24 6550.30 350.466   3
   1  -3 -23 251.601 67.5549   3
   1  -3 -22 7753.05 364.829   3
   1  -3 -21 1705.38 152.406   3
   1   3 -21 1877.31 137.896   3
   1   3 -20 1635.50 118.900   3
   1  -3 -20 1322.61 127.831   3
   1   3 -19 72.3932 24.8905   3
   1  -3 -19 65.7087 20.5023   3
   1   3 -18 36.8796 25.7669   3
   1  -3 -18-45.0975 22.1302   3
   1  -3 -17 2514.91 167.354   3
   1   3 -17 2593.19 139.108   3
   1   3 -16 5894.59 220.926   3
   1  -3 -16 5610.71 254.247   3
   1   3 -15 12714.1 365.091   3
   1  -3 -15 12344.1 412.389   3
   1   3 -14 7792.50 249.878   3
   1  -3 -14 7845.03 294.230   3
   1   3 -13 7486.17 232.882   2
   1   3 -13 7313.83 231.121   3
   1  -3 -13 7542.05 277.580   3
   1  -3 -12 13156.8 372.845   4
   1  -3 -12 13109.9 401.316   3
   1   3 -12 13460.6 353.959   3
   1   3 -12 13823.0 361.238   2
   1   3 -11 12026.3 310.390   3
   1  -3 -11 11745.5 358.056   3
  -1  -3  11 11442.4 306.701   2
   1   3 -11 13012.4 321.916   2
  -1  -3  11 11536.5 270.170   4
   1  -3 -11 11105.7 326.677   4
   1   3 -10 15646.0 384.735   3
  -1  -3  10 16023.4 388.302   2
   1  -3 -10 16275.0 438.598   3
  -1  -3  10 15229.6 352.090   4
   1   3 -10 16985.3 400.499   2
   1  -3 -10 15592.6 408.868   4
   1  -3  -9 3372.44 130.130   4
   1   3  -9 3514.98 123.974   2
   1   3  -9 3359.76 111.433   3
  -1  -3   9 3427.43 94.4120   4
   1  -3  -9 3485.08 145.936   3
  -1  -3   9 3369.05 116.800   2
   1   3  -8 765.641 40.0356   3
  -1  -3   8 774.567 47.1362   2
   1   3  -8 904.449 51.6150   2
   1  -3  -8 770.116 53.7146   4
   1  -3  -8 887.709 62.9128   3
   1  -3  -7 1017.25 60.5295   4
   1  -3  -7 1030.25 67.0233   3
   1   3  -7 1077.27 44.9516   3
   1  -3  -7 981.197 56.5172   5
   1  -3  -7 426.399 44.0674   2
   1   3  -7 1178.17 57.6627   2
  -1  -3   7 1164.24 54.6655   2
   1  -3  -6 7599.34 219.633   4
   1   3  -6 8091.99 191.584   3
  -1  -3   6 8074.37 208.615   2
   1  -3  -6 7965.04 234.023   3
   1   3  -6 8291.08 220.986   2
   1  -3  -5 788.503 48.0785   4
   1  -3  -5 944.362 54.4906   3
   1   3  -5 844.073 47.8693   2
  -1  -3   5 900.574 44.0972   2
   1   3  -5 823.333 30.3662   3
   1   3  -4 8424.69 216.945   2
   1  -3  -4 8257.55 219.557   4
  -1  -3   4 8565.87 219.582   2
   1   3  -3 12067.7 298.381   2
  -1  -3   3 12534.1 286.463   1
  -1  -3   3 12939.8 307.633   2
   1  -3  -3 12432.7 301.662   4
  -1  -3   2 25861.1 575.879   2
   1  -3  -2 25007.1 572.507   4
   1   3  -2 26196.5 562.987   1
  -1  -3   1 6359.77 147.255   3
   1   3  -1 6096.18 143.823   3
   1  -3  -1 5869.73 158.856   4
   1  -3   0 53361.0 1141.47   4
  -1  -3   0 55212.0 1140.09   3
  -1   3   0 57402.6 1158.55   1
   1   3   1 3745.78 107.443   3
  -1   3  -1 4187.50 119.486   1
  -1  -3  -1 3883.36 109.871   3
   1  -3   1 4103.27 118.137   1
   1  -3   1 3688.08 101.496   4
   1  -3   2 5212.37 125.658   3
  -1  -3  -2 4450.53 135.614   3
   1   3   2 4658.54 133.363   3
   1  -3   2 5228.92 142.664   1
   1  -3   2 4667.27 118.638   4
   1   3   3 4815.46 137.339   3
  -1  -3  -3 4572.69 140.854   3
  -1   3  -3 4706.44 124.116   3
   1  -3   3 4475.10 111.961   4
   1  -3   3 4936.34 117.890   3
  -1  -3  -4 426.774 35.0662   3
  -1   3  -4 345.833 27.4115   3
   1   3   4 524.968 37.5291   3
   1  -3   4 414.375 22.9409   3
  -1   3  -5 12901.8 303.197   3
  -1  -3  -5 12620.9 332.529   3
   1  -3   5 12957.8 297.234   3
   1   3   5 13300.2 328.104   3
  -1  -3  -6 3132.21 122.820   3
  -1   3  -6 3259.20 99.3840   3
   1  -3   6 3129.84 93.4254   3
   1   3   6 3352.71 118.221   3
  -1   3  -6 2709.39 83.3337   2
  -1   3  -7 18293.4 419.131   2
   1  -3   7 18169.2 429.536   3
  -1   3  -7 19620.2 439.055   3
  -1  -3  -7 19614.7 478.261   3
  -1  -3  -8 37491.9 882.121   3
  -1   3  -8 38646.3 840.733   3
   1  -3   8 37196.5 831.340   3
  -1   3  -8 37168.7 818.267   2
  -1   3  -9 18958.6 448.837   3
   1  -3   9 17970.8 436.992   3
  -1   3  -9 18351.2 425.185   2
  -1  -3  -9 18148.8 488.063   3
  -1  -3  -9 18632.3 463.301   4
  -1  -3 -10 23964.4 632.372   3
  -1  -3 -10 24732.3 601.089   4
  -1   3 -10 25560.5 566.816   2
   1  -3  10 24409.1 579.139   3
  -1   3 -10 24459.5 588.092   3
  -1  -3 -11 10698.8 334.697   3
  -1  -3 -11 10491.0 299.512   4
  -1   3 -11 9763.26 265.283   2
  -1   3 -11 10599.6 292.804   3
  -1  -3 -12 10820.3 348.154   3
  -1   3 -12 9876.86 274.341   2
  -1  -3 -12 10350.9 306.062   4
  -1   3 -12 11274.1 308.947   3
  -1   3 -13 2166.41 112.086   3
  -1   3 -13 1944.24 89.2542   2
  -1  -3 -13 2060.56 109.268   4
  -1  -3 -13 2007.28 131.156   3
  -1   3 -14 4658.63 170.840   2
  -1   3 -14 5307.61 197.741   3
  -1  -3 -14 5125.91 192.078   4
  -1  -3 -14 4929.53 226.947   3
  -1  -3 -15 52.4984 25.3022   3
  -1   3 -15 12.8443 18.7564   3
  -1  -3 -15 65.6625 29.7476   4
  -1   3 -16 168.558 41.3709   3
  -1  -3 -16 133.939 25.7291   4
  -1  -3 -16 145.823 43.5827   3
  -1  -3 -17 1620.15 136.384   3
  -1   3 -17 1558.73 110.886   3
  -1  -3 -18 3242.58 205.245   3
  -1   3 -18 3649.85 185.849   3
  -1  -3 -19 2332.21 178.883   3
  -1   3 -19 2825.79 164.883   3
  -1   3 -20 9401.76 352.060   3
  -1  -3 -20 8612.21 384.459   3
  -1  -3 -21 4244.15 264.283   3
  -1   3 -21 5035.71 250.912   3
  -1  -3 -22 9580.18 431.277   3
  -1  -3 -23 1274.24 145.694   3
  -1  -3 -24 1753.50 180.978   3
   1  -4 -24 10.8818 46.6944   3
   1  -4 -23 1633.21 168.987   3
   1  -4 -22 4937.30 289.740   3
   1  -4 -21 2260.70 189.904   3
   1  -4 -20 9161.30 392.050   3
   1   4 -19 5889.47 234.042   3
   1  -4 -19 5016.74 268.638   3
   1  -4 -18 8642.65 363.186   3
   1   4 -18 9673.96 313.344   3
   1   4 -17 7044.43 246.641   3
   1  -4 -17 6688.08 299.821   3
   1   4 -16 2052.21 110.695   3
   1  -4 -16 1976.42 144.537   3
   1  -4 -15 943.984 94.4093   3
   1   4 -15 907.943 68.7002   3
   1  -4 -14 4634.30 188.084   4
   1   4 -14 3638.36 162.168   2
   1  -4 -14 4173.49 202.264   3
   1   4 -14 4517.48 160.459   3
   1   4 -13 1858.93 89.8555   3
   1  -4 -13 1732.65 105.023   4
   1  -4 -13 1826.04 122.490   3
   1   4 -13 1658.75 92.5774   2
   1   4 -12 1604.48 86.9318   2
  -1  -4  12 1570.03 77.3517   2
   1  -4 -12 1653.93 112.452   3
   1  -4 -12 1475.17 94.9205   4
   1   4 -12 1552.42 76.8161   3
  -1  -4  11 2081.25 88.2258   2
   1  -4 -11 2049.81 125.314   3
   1   4 -11 2152.09 100.053   2
   1  -4 -11 2012.85 109.492   4
   1   4 -11 2112.78 87.5613   3
  -1  -4  11 2008.38 58.9749   4
   1   4 -10 14238.4 380.831   2
  -1  -4  10 14542.1 328.678   4
   1  -4 -10 15116.1 399.329   4
   1   4 -10 14835.3 356.673   3
   1  -4 -10 15083.2 423.011   3
  -1  -4  10 15171.2 366.492   2
   1  -4  -9 574.982 51.9132   4
   1   4  -9 574.738 36.2544   3
  -1  -4   9 519.197 40.4294   2
   1  -4  -9 568.474 58.6134   3
   1   4  -9 515.642 41.5137   2
   1  -4  -8 24260.1 559.656   5
   1  -4  -8 21984.8 564.664   4
   1   4  -8 22873.8 557.060   2
   1   4  -8 23541.5 520.665   3
  -1  -4   8 23453.9 540.518   2
   1  -4  -8 24508.2 592.562   3
   1  -4  -7 1100.50 71.7383   3
   1   4  -7 1046.86 57.6002   2
   1   4  -7 1076.49 40.5648   3
   1  -4  -7 976.593 60.6721   4
  -1  -4   7 1013.69 53.2294   2
   1  -4  -6 23592.2 576.168   3
   1  -4  -6 23186.2 562.453   4
   1   4  -6 23407.0 511.283   3
  -1  -4   6 24460.8 546.328   2
   1   4  -6 23898.4 551.055   2
   1  -4  -5 4632.42 152.344   4
  -1  -4   5 5052.63 148.264   2
   1   4  -5 4905.89 144.287   2
   1  -4  -5 4593.28 157.991   3
   1  -4  -4 2121.07 88.7109   4
   1   4  -4 2208.18 82.0001   2
  -1  -4   4 2223.60 87.8412   2
   1  -4  -4 2310.39 93.0288   3
  -1  -4   4 2272.65 77.8224   1
   1  -4  -3 496.166 35.0885   4
  -1  -4   3 488.490 34.8768   2
  -1  -4   3 491.495 31.5406   1
  -1  -4   2 3364.62 84.2851   3
  -1  -4   2 3585.47 108.727   2
   1   4  -2 2956.83 81.9843   3
   1   4  -2 3654.94 102.350   1
   1  -4  -2 3535.39 109.713   4
  -1  -4   1 5558.09 137.205   3
   1  -4  -1 5597.69 153.984   4
   1   4  -1 5285.66 134.996   3
   1  -4   0 72763.8 1609.14   4
  -1  -4   0 76742.7 1603.84   3
   1   4   0 73315.8 1600.53   3
   1   4   1 22971.9 524.301   3
   1  -4   1 23017.4 521.031   4
  -1   4  -1 23433.4 542.022   1
  -1  -4  -1 23150.1 526.688   3
   1  -4   1 24094.6 540.010   1
  -1  -4  -2 26437.7 594.467   3
   1  -4   2 26723.3 602.499   1
   1   4   2 26330.2 591.208   3
   1  -4   2 25599.4 570.089   3
   1  -4   2 25849.5 575.713   4
   1  -4   3 5330.32 136.932   4
   1   4   3 5740.39 160.734   3
  -1  -4  -3 5438.11 163.528   3
   1  -4   3 5405.14 136.200   2
   1  -4   3 5549.93 136.742   3
   1  -4   3 5275.43 163.154   1
   1  -4   4 103972. 2214.57   4
   1   4   4 109569. 2257.33   3
   1  -4   4 103415. 2217.53   2
   1  -4   4 104774. 2215.22   3
  -1   4  -4 109103. 2221.57   3
  -1  -4  -4 104968. 2262.35   3
  -1  -4  -5 477.130 49.0455   3
  -1   4  -5 379.805 29.0396   3
   1  -4   5 434.266 22.5509   3
   1  -4   5 322.027 17.4151   2
   1  -4   5 401.236 18.7040   4
   1   4   5 468.008 40.3565   3
   1  -4   6 46604.4 843.012   3
   1   4   6 50773.3 905.708   3
  -1   4  -6 47902.0 857.834   3
  -1  -4  -6 47215.1 911.111   3
  -1   4  -7 44.4085 8.13882   2
  -1  -4  -7 33.2247 27.9495   3
  -1   4  -7 28.3925 11.0408   3
   1  -4   7 41.9214 11.4970   3
  -1  -4  -8 12165.4 340.434   3
   1  -4   8 11569.1 279.650   3
  -1   4  -8 11679.9 286.400   3
  -1   4  -8 11052.1 268.880   2
  -1   4  -9 2697.66 101.382   3
  -1  -4  -9 2660.62 133.070   3
  -1   4  -9 2773.73 89.6956   2
  -1  -4  -9 2802.35 124.257   4
   1  -4   9 2609.40 93.6098   3
  -1  -4 -10 274.260 49.3211   3
  -1  -4 -10 337.794 43.1986   4
  -1   4 -10 356.191 36.0585   3
  -1   4 -10 324.241 27.1816   2
  -1   4 -11 1979.28 80.9641   2
  -1   4 -11 2079.82 95.7042   3
  -1  -4 -11 2196.90 112.661   4
  -1  -4 -11 2089.79 126.454   3
  -1  -4 -12 3629.89 157.047   4
  -1  -4 -12 3879.03 184.056   3
  -1   4 -12 3503.18 124.559   2
  -1   4 -12 3792.25 143.680   3
  -1   4 -13 4150.15 145.701   2
  -1  -4 -13 4561.71 212.476   3
  -1   4 -13 4597.47 169.239   3
  -1  -4 -13 4674.61 185.869   4
  -1  -4 -14 10455.4 364.349   3
  -1   4 -14 8803.26 268.879   2
  -1   4 -14 10563.6 304.884   3
  -1  -4 -14 10309.7 319.399   4
  -1  -4 -15 10910.5 345.667   4
  -1  -4 -15 10910.2 394.610   3
  -1   4 -15 10959.8 334.311   3
  -1  -4 -16 5248.76 213.057   4
  -1  -4 -16 4945.25 252.026   3
  -1   4 -16 5177.58 206.266   3
  -1   4 -17 5247.15 216.730   3
  -1  -4 -17 5119.46 214.040   4
  -1  -4 -17 5074.68 262.752   3
  -1  -4 -18 10279.5 419.415   3
  -1   4 -18 11137.1 364.739   3
  -1   4 -19 850.026 87.8515   3
  -1  -4 -19 737.341 109.690   3
  -1  -4 -20 666.052 109.783   3
  -1  -4 -21 856.096 124.786   3
  -1  -4 -22 531.797 81.6798   3
  -1  -4 -23-9.40688 58.5935   3
   1  -5 -23 5065.05 309.992   3
   1  -5 -22 920.172 121.965   3
   1  -5 -21 4746.10 278.244   3
   1  -5 -20 106.032 55.9611   3
   1  -5 -19 629.566 95.3951   3
   1  -5 -18 154.550 36.9342   3
   1   5 -18 214.634 36.7661   3
   1   5 -17 1152.03 81.2474   3
   1  -5 -17 1133.76 116.216   3
   1   5 -16 3334.99 141.262   3
   1  -5 -16 3146.65 190.564   3
   1   5 -15 15313.6 398.219   3
   1  -5 -15 14908.9 450.963   4
   1  -5 -15 13986.1 475.358   3
   1  -5 -14 1771.37 114.555   4
   1   5 -14 1791.07 88.2883   3
   1   5 -14 1748.22 100.268   2
   1  -5 -14 1872.26 131.983   3
   1   5 -13 14741.9 402.897   2
   1   5 -13 14968.0 374.288   3
   1  -5 -13 14503.3 426.946   4
  -1  -5  13 14864.7 376.006   2
   1  -5 -13 14281.2 454.387   3
  -1  -5  12 1231.71 66.6571   2
   1   5 -12 1345.15 64.6374   3
   1   5 -12 1366.39 79.3122   2
   1  -5 -12 1120.19 85.8748   4
   1  -5 -12 1185.13 99.5203   3
   1  -5 -11 10237.3 309.115   4
   1  -5 -11 10164.1 329.137   3
  -1  -5  11 8974.91 215.601   4
   1   5 -11 11160.5 286.613   2
  -1  -5  11 10600.5 265.406   2
   1   5 -11 10522.5 250.985   3
   1  -5 -10 3968.97 164.453   4
   1   5 -10 4141.76 143.902   2
   1   5 -10 3957.89 116.887   3
   1  -5 -10 3917.33 173.890   3
  -1  -5  10 3795.12 129.261   2
   1  -5  -9 583.570 58.3084   3
  -1  -5   9 644.853 44.1427   2
   1  -5  -9 573.990 57.2231   4
   1   5  -9 671.170 45.8288   2
   1  -5  -9 600.259 50.2139   5
   1   5  -9 585.464 30.7359   3
   1  -5  -8 14865.6 400.351   4
   1  -5  -8 15544.1 418.878   3
  -1  -5   8 15349.4 368.296   2
   1   5  -8 14744.7 336.035   3
   1   5  -8 15734.0 375.088   2
  -1  -5   7 872.312 48.9884   2
   1   5  -7 888.579 52.1362   2
   1  -5  -7 887.623 64.4394   4
   1  -5  -7 806.710 61.0802   3
   1  -5  -6 1972.48 99.6378   3
  -1  -5   6 2088.35 85.0334   2
   1   5  -6 2035.22 81.7662   2
   1  -5  -6 1880.82 93.4765   4
  -1  -5   6 1820.96 79.3164   1
   1  -5  -5 17815.4 437.665   4
   1  -5  -5 17290.1 440.129   3
  -1  -5   5 17656.7 414.560   1
  -1  -5   5 17246.4 430.396   2
   1  -5  -4 6250.74 190.188   3
  -1  -5   4 6217.27 185.179   2
  -1  -5   4 6482.59 173.834   1
   1  -5  -4 5754.73 187.461   4
  -1  -5   3 55246.5 1218.08   2
   1  -5  -3 57470.4 1221.65   3
   1  -5  -3 54042.7 1221.61   4
   1   5  -2 1572.88 66.7527   1
  -1  -5   2 1473.98 50.7334   3
   1  -5  -2 1533.86 72.5837   4
  -1  -5   1 64058.8 1344.11   3
   1  -5  -1 61224.7 1367.69   4
   1   5  -1 63051.7 1341.38   3
   1  -5   0 8383.80 218.041   4
   1   5   0 7828.29 202.325   3
  -1  -5   0 8091.97 205.733   3
  -1   5   0 8536.91 233.139   1
   1  -5   1 44264.9 953.306   4
  -1   5  -1 46051.3 975.414   1
  -1  -5  -1 43216.5 952.665   3
   1   5   1 43383.0 949.359   3
  -1  -5  -2 636.359 42.6532   3
   1  -5   2 583.983 34.7926   4
   1   5   2 773.981 44.3707   3
   1  -5   2 645.087 45.5496   1
  -1   5  -2 661.492 49.2267   1
   1  -5   3 9269.38 241.461   1
   1  -5   3 8805.01 214.646   4
   1  -5   3 7679.73 204.708   3
  -1  -5  -3 8890.05 238.989   3
   1   5   3 9473.58 236.427   3
   1  -5   4 4899.53 154.485   1
   1  -5   4 3614.61 112.485   3
   1  -5   4 4954.82 123.743   4
   1   5   4 5421.36 154.658   3
   1  -5   4 4668.30 123.970   2
  -1  -5  -4 5025.66 158.294   3
  -1  -5  -5 2384.16 107.028   3
   1  -5   5 2224.88 101.650   1
   1  -5   5 2353.85 72.7440   2
   1  -5   5 2337.76 66.2370   3
   1  -5   5 2412.24 71.7314   4
   1   5   5 2703.64 105.874   3
   1  -5   6 4639.80 112.112   3
   1  -5   6 3625.43 109.547   2
  -1   5  -6 4344.41 121.806   3
   1  -5   6 4702.70 109.756   4
  -1  -5  -6 4821.28 167.066   3
  -1  -5  -7 8627.91 231.129   3
  -1   5  -7 9003.68 176.341   3
   1  -5   7 8564.77 152.610   3
  -1  -5  -8 11770.8 259.895   3
  -1   5  -8 10910.3 171.204   3
   1  -5   8 11344.4 150.730   3
  -1  -5  -9 21950.7 566.017   4
  -1   5  -9 22150.7 514.190   3
  -1  -5  -9 21940.6 581.053   3
  -1  -5 -10 5553.65 221.690   3
  -1   5 -10 5452.34 167.470   3
  -1   5 -10 5662.71 144.095   2
  -1  -5 -10 5700.84 209.973   4
  -1  -5 -11 18882.7 510.048   4
  -1   5 -11 19082.8 428.991   2
  -1  -5 -11 19427.5 540.150   3
  -1   5 -11 18363.5 457.040   3
  -1  -5 -12 1075.63 87.1690   4
  -1   5 -12 1096.90 51.6333   2
  -1  -5 -12 1127.70 99.5578   3
  -1   5 -12 1080.02 66.2328   3
  -1  -5 -13 17689.2 488.452   4
  -1   5 -13 17159.5 440.833   3
  -1   5 -13 17058.1 413.318   2
  -1  -5 -13 17833.7 527.896   3
  -1   5 -14 430.314 46.1837   3
  -1  -5 -14 356.099 54.2040   4
  -1  -5 -14 484.156 74.0451   3
  -1  -5 -15 710.127 87.3482   3
  -1  -5 -15 567.508 66.4935   4
  -1   5 -15 662.304 59.4605   3
  -1   5 -16 246.171 41.8033   3
  -1  -5 -16 125.294 40.1714   3
  -1  -5 -16 308.124 49.2090   4
  -1  -5 -17 1654.17 113.360   4
  -1   5 -17 1524.80 100.096   3
  -1  -5 -17 1583.66 144.192   3
  -1  -5 -18 687.953 75.0111   4
  -1   5 -18 795.644 74.3106   3
  -1  -5 -18 839.774 114.498   3
  -1  -5 -19 5487.09 298.824   3
  -1  -5 -20 3601.68 244.040   3
  -1  -5 -21 7984.63 391.500   3
  -1  -5 -22 2157.44 204.432   3
  -1  -5 -23 3641.27 267.812   3
   1  -6 -23 593.796 112.328   3
   1  -6 -22 2676.46 227.509   3
   1  -6 -21 6212.26 339.722   3
   1  -6 -20 3293.07 227.679   3
   1  -6 -19 9070.97 392.641   3
   1  -6 -18 9444.00 393.112   3
   1  -6 -17 10173.4 402.370   3
   1   6 -16 5851.21 188.922   3
   1  -6 -16 5360.32 265.804   3
   1  -6 -16 5550.78 246.393   4
   1   6 -15 6576.12 197.706   3
   1  -6 -15 6061.87 277.396   3
   1  -6 -15 6262.49 256.794   4
   1   6 -14 163.276 25.8513   3
   1  -6 -14 171.137 43.7573   3
   1  -6 -14 142.255 32.9395   4
  -1  -6  13 41.0381 18.5131   2
   1  -6 -13 17.0630 28.0805   3
   1  -6 -13 54.0313 24.4128   4
   1   6 -13 29.3764 10.1796   2
   1   6 -13 43.2345 14.4442   3
  -1  -6  12 117.343 24.1139   2
   1  -6 -12 105.944 28.7997   4
   1   6 -12 135.348 17.5513   3
   1   6 -12 113.739 22.7719   2
   1  -6 -12 142.165 43.3027   3
   1  -6 -11 3723.84 175.917   3
   1  -6 -11 3891.93 170.138   4
  -1  -6  11 3825.45 127.794   2
   1   6 -11 4146.46 134.831   2
   1   6 -11 3133.69 104.746   3
   1  -6 -10 1597.38 100.658   4
   1   6 -10 1887.59 78.9949   2
   1  -6 -10 1489.25 84.0061   5
   1  -6 -10 1640.60 107.586   3
   1   6 -10 1151.53 50.2367   3
  -1  -6  10 1757.57 74.9994   2
   1   6  -9 7189.19 198.535   2
   1  -6  -9 6657.79 245.075   3
  -1  -6   9 6919.82 197.111   2
   1  -6  -9 6571.87 234.316   4
   1  -6  -9 6796.00 216.062   5
  -1  -6   8 2965.66 109.356   2
   1  -6  -8 2961.22 141.426   3
   1  -6  -8 2978.86 135.584   4
   1  -6  -7 30873.3 728.962   3
  -1  -6   7 31050.4 688.730   2
   1  -6  -7 29018.1 717.240   4
  -1  -6   7 28422.3 689.236   1
   1  -6  -6 5452.90 190.731   4
   1  -6  -6 5747.95 196.279   3
  -1  -6   6 5600.31 169.453   1
  -1  -6   6 5526.62 177.770   2
  -1  -6   5 5481.67 164.248   1
  -1  -6   5 5282.79 176.857   2
   1  -6  -5 5208.73 181.586   4
   1  -6  -5 5292.43 181.212   3
  -1  -6   4 3404.95 125.466   2
   1  -6  -4 3197.32 129.245   4
   1  -6  -4 3383.67 127.251   3
   1  -6  -3 1880.81 83.5367   3
   1   6  -3 1959.39 82.1234   1
   1  -6  -3 1814.94 88.8184   4
  -1  -6   3 2043.75 85.4583   2
  -1  -6   3 1383.30 47.8461   3
   1   6  -2 8.76981 11.9214   1
   1  -6  -2-8.20405 11.0676   3
  -1  -6   2 32.7959 12.9539   3
   1  -6  -2 18.7564 15.3134   4
  -1  -6   1 7310.80 188.736   3
   1  -6  -1 7400.04 212.669   4
   1   6  -1 7416.63 212.060   1
  -1  -6   0 3067.40 101.045   3
  -1   6   0 3121.85 125.303   1
   1  -6   0 2920.07 113.309   4
  -1  -6  -1 17425.5 422.760   3
  -1   6  -1 18475.4 450.206   1
   1  -6   1 17852.8 428.038   4
   1  -6   2 11347.8 283.796   4
  -1  -6  -2 11224.2 291.422   3
  -1   6  -2 10886.1 309.239   1
   1  -6   3 22414.8 474.766   4
  -1  -6  -3 22334.8 497.909   3
   1  -6   3 23556.1 504.056   1
   1  -6   4 1542.95 55.2665   3
   1  -6   4 2348.41 79.9074   2
  -1  -6  -4 2307.43 99.7115   3
   1  -6   4 2266.09 98.5483   1
   1  -6   4 2380.01 78.9617   4
   1  -6   5 24840.1 578.556   1
   1  -6   5 24048.4 533.917   4
  -1  -6  -5 22744.0 582.459   3
   1  -6   5 22067.6 541.152   2
  -1  -6  -5 25296.5 536.992   5
   1  -6   6 1722.01 54.6184   3
   1  -6   6 2360.35 69.6777   2
   1  -6   6 2388.44 70.3344   4
  -1  -6  -6 2300.58 111.413   3
  -1  -6  -7 11846.9 329.458   3
   1  -6   7 10950.8 246.093   4
   1  -6   7 10161.2 238.664   3
   1  -6   7 10564.3 243.871   2
  -1  -6  -8 1685.66 102.001   3
  -1   6  -8 1507.86 57.7237   3
  -1  -6  -9 497.769 61.5907   4
  -1  -6  -9 641.821 66.4164   3
  -1   6  -9 523.049 35.4171   3
  -1  -6 -10 1428.24 105.261   3
  -1   6 -10 1381.33 66.4258   3
  -1  -6 -10 1154.54 88.1019   4
  -1  -6 -11 3573.50 168.135   4
  -1   6 -11 3796.69 128.848   3
  -1  -6 -11 3722.85 185.064   3
  -1  -6 -12 10714.9 345.377   4
  -1  -6 -12 10511.3 365.081   3
  -1   6 -12 10217.7 279.706   3
  -1  -6 -13 13368.3 442.283   3
  -1   6 -13 13110.9 349.528   3
  -1  -6 -13 13516.1 414.394   4
  -1  -6 -14 10285.9 350.626   4
  -1  -6 -14 10203.2 380.414   3
  -1   6 -14 10249.2 292.489   3
  -1   6 -15 14715.7 398.841   3
  -1  -6 -15 14992.9 504.082   3
  -1  -6 -15 15167.1 465.575   4
  -1  -6 -16 6936.93 280.819   4
  -1  -6 -16 7429.98 325.967   3
  -1   6 -16 6863.58 233.665   3
  -1  -6 -17 8370.89 366.895   3
  -1  -6 -17 8724.09 327.930   4
  -1  -6 -18 5601.56 255.407   4
  -1  -6 -18 5529.08 294.948   3
  -1  -6 -19 4014.07 214.185   4
  -1  -6 -19 4058.49 257.717   3
  -1  -6 -20 3325.43 241.334   3
  -1  -6 -21 224.543 72.1705   3
  -1  -6 -22 241.332 90.6003   3
   1  -7 -22 4560.89 299.348   3
   1  -7 -21 228.908 90.3635   3
   1  -7 -20 1127.78 139.039   3
   1  -7 -19 84.1281 24.7441   3
   1  -7 -18 129.537 30.4807   3
   1  -7 -17 155.411 56.3155   3
   1  -7 -17 142.829 30.9124   4
   1  -7 -16 6553.96 299.291   3
   1  -7 -16 6308.66 273.396   4
   1  -7 -15 699.203 90.4649   3
   1  -7 -15 672.353 82.0151   4
  -1  -7  14 25096.4 546.293   2
   1  -7 -14 24864.9 650.026   4
   1  -7 -14 23117.9 663.290   3
   1   7 -13 438.463 29.0997   3
   1  -7 -13 522.144 72.4836   3
  -1  -7  13 583.025 44.5379   2
   1  -7 -13 415.150 55.4682   4
   1  -7 -12 18664.4 550.312   3
  -1  -7  12 18928.1 455.122   2
   1  -7 -12 18564.9 534.985   4
   1  -7 -11 2506.12 146.281   3
   1  -7 -11 2489.33 138.987   4
  -1  -7  11 2667.68 104.687   2
   1  -7 -10 1240.64 95.6053   4
   1  -7 -10 1348.94 81.9649   5
   1  -7 -10 1355.47 100.267   3
  -1  -7  10 1270.46 66.3457   2
   1  -7  -9 583.859 64.8827   3
   1  -7  -9 547.278 61.7186   4
  -1  -7   9 587.511 43.8590   2
  -1  -7   8 686.036 52.6664   1
  -1  -7   8 779.150 51.4509   2
   1  -7  -8 658.277 61.4959   3
   1  -7  -8 658.289 62.3423   4
   1  -7  -7 4666.89 186.170   3
  -1  -7   7 4850.63 162.697   1
  -1  -7   7 4943.56 164.137   2
   1  -7  -7 4727.02 186.223   4
   1  -7  -6 7192.58 239.448   3
  -1  -7   6 7614.92 218.347   1
  -1  -7   6 7383.11 230.101   2
   1  -7  -6 6937.15 239.699   4
  -1  -7   5 28.7824 17.3570   2
   1  -7  -5 35.7626 29.5187   4
   1  -7  -5 57.5004 25.5199   3
  -1  -7   4 19711.7 503.729   2
   1  -7  -4 20816.0 517.929   4
   1  -7  -4 20732.3 507.079   3
  -1  -7   3 27.8274 8.81695   3
  -1  -7   3 38.7630 10.4932   2
   1   7  -3 29.3340 18.6785   1
   1  -7  -3 36.7164 25.5607   4
   1  -7  -3 33.4812 19.8363   3
  -1  -7   2 90094.7 1906.95   3
   1   7  -2 93969.1 1952.32   1
   1  -7  -2 87925.3 1958.36   4
   1  -7  -2 87808.7 1937.66   3
  -1  -7   1 81.2315 17.4165   3
   1  -7  -1 54.6400 21.0647   3
   1   7  -1 50.0728 19.3697   1
   1  -7  -1 103.680 36.3553   4
  -1   7   1 32.6157 25.2706   1
  -1   7   0 71869.7 1542.13   1
   1  -7   0 68091.0 1488.62   3
  -1  -7   0 68617.0 1493.82   3
   1  -7   0 69501.7 1516.64   4
   1  -7   1 3254.85 103.051   3
  -1   7  -1 3415.36 137.029   1
  -1  -7  -1 3226.03 115.543   3
   1  -7   1 3084.57 121.380   4
  -1  -7  -2 26234.7 609.516   3
   1  -7   2 25561.5 604.982   4
  -1   7  -2 25996.2 636.267   1
  -1  -7  -3 69.7631 21.8031   3
   1  -7   3 70.5897 10.1348   3
   1  -7   3 51.0846 17.5623   4
   1  -7   4 4682.96 117.753   4
  -1  -7  -4 4508.43 143.302   3
   1  -7   4 3577.25 75.1119   3
   1  -7   4 4241.64 114.529   2
   1  -7   5 38.1446 15.3248   2
   1  -7   5 47.5197 17.4686   4
  -1  -7  -5 49.4624 22.9322   3
   1  -7   6 2050.02 77.5500   2
  -1  -7  -6 2044.75 109.027   3
  -1  -7  -6 2092.81 78.4837   5
   1  -7   6 2138.47 76.4387   4
   1  -7   7 109.074 12.9796   4
  -1  -7  -7 107.387 28.6827   3
   1  -7   7 138.511 17.4529   2
  -1  -7  -8 14352.1 392.286   3
   1  -7   8 12282.9 287.341   2
  -1  -7  -9 806.482 76.4664   3
  -1  -7  -9 749.721 71.7540   4
  -1  -7 -10 13347.4 358.339   4
  -1  -7 -10 13044.1 367.685   3
  -1  -7 -11 286.223 55.8915   3
  -1   7 -11 179.499 21.8222   3
  -1  -7 -11 216.924 48.5662   4
  -1  -7 -12 18530.1 556.924   3
  -1   7 -12 18430.8 444.980   3
  -1  -7 -12 19407.8 544.184   4
  -1   7 -13 320.035 37.5693   3
  -1  -7 -13 295.193 47.9794   4
  -1  -7 -13 460.294 79.8568   3
  -1  -7 -14 6868.94 302.740   3
  -1   7 -14 6881.44 213.356   3
  -1  -7 -14 6807.95 278.085   4
  -1  -7 -15 885.956 111.441   3
  -1  -7 -15 848.071 90.2056   4
  -1  -7 -16 12.4973 33.8741   3
  -1  -7 -16 24.4703 40.0308   4
  -1  -7 -17 89.9446 34.2001   4
  -1  -7 -17 30.1805 35.5290   3
  -1  -7 -18 3558.72 203.261   4
  -1  -7 -18 3296.53 228.919   3
  -1  -7 -19 155.482 35.1212   3
  -1  -7 -20 5031.52 309.666   3
  -1  -7 -21 402.479 88.8860   3
   1  -8 -21 5562.86 333.954   3
   1  -8 -20 7926.50 395.933   3
   1  -8 -19 9131.66 411.954   3
   1  -8 -18 13265.4 504.773   3
   1  -8 -17 13105.4 462.160   4
   1  -8 -17 12489.0 478.419   3
   1  -8 -16 15206.7 507.909   4
   1  -8 -16 15737.4 534.291   3
   1  -8 -15 4359.19 238.079   3
   1  -8 -15 4486.88 224.669   4
   1  -8 -14 4003.62 220.880   3
   1  -8 -14 4221.46 212.443   4
  -1  -8  13 1650.22 79.0280   2
   1  -8 -13 1385.74 121.143   3
   1  -8 -13 1480.36 119.965   4
  -1  -8  12 1014.58 59.4949   2
   1  -8 -12 887.993 90.0891   4
   1  -8 -12 1013.32 96.3521   3
   1  -8 -11 232.234 49.6672   3
   1  -8 -11 239.220 49.2038   4
  -1  -8  11 253.778 34.5527   2
   1  -8 -10 710.046 69.9494   4
   1  -8 -10 822.905 62.9324   5
   1  -8 -10 653.379 71.7871   3
  -1  -8  10 738.594 52.5222   2
   1  -8  -9 6383.69 243.959   3
   1  -8  -9 6135.38 238.420   4
  -1  -8   9 6303.87 193.398   2
   1  -8  -8 4543.48 193.823   3
  -1  -8   8 4680.84 161.509   2
   1  -8  -8 4783.16 198.579   4
   1  -8  -7 8544.01 289.198   4
  -1  -8   7 8995.97 268.641   2
   1  -8  -7 9211.32 290.656   3
   1  -8  -6 13708.1 382.565   3
   1  -8  -6 13464.9 390.309   4
  -1  -8   6 13100.0 372.577   2
   1  -8  -5 11854.9 343.574   3
  -1  -8   5 12343.2 343.128   2
   1  -8  -5 12226.3 355.300   4
   1  -8  -4 5516.28 192.158   3
  -1  -8   4 5858.52 196.982   2
   1  -8  -4 5732.72 203.471   4
   1  -8  -3 405.683 47.4812   4
   1   8  -3 363.779 46.0728   1
   1  -8  -3 470.422 42.3835   3
  -1  -8   3 358.803 37.5953   2
  -1  -8   3 363.597 23.4713   3
  -1  -8   2 39.6572 14.9801   3
   1  -8  -2 38.7443 26.9432   4
   1   8  -2 19.1590 17.9334   1
   1  -8  -2 21.1041 16.5764   3
  -1   8   1 40.3079 22.5397   1
  -1  -8   1 27.1450 15.8719   3
   1  -8  -1 24.1905 14.4200   3
   1  -8  -1 16.6378 14.8122   4
   1   8  -1 18.5062 16.2571   1
   1  -8   0 1044.00 56.3504   3
  -1  -8   0 989.553 58.0891   3
  -1   8   0 1041.71 77.1173   1
   1  -8   0 935.002 67.2828   4
  -1   8  -1 3340.58 143.814   1
  -1  -8  -1 3263.74 120.724   3
   1  -8   1 3298.50 129.740   4
   1  -8   1 3148.91 105.664   3
  -1   8  -2 5609.82 200.610   1
   1  -8   2 5444.71 149.726   3
   1  -8   2 5573.21 179.570   4
  -1  -8  -2 5401.86 178.853   3
   1  -8   3 14901.7 325.661   3
  -1  -8  -3 14922.3 380.305   3
   1  -8   3 12615.1 326.082   3
   1  -8   3 15116.8 367.074   4
  -1  -8  -4 11745.8 265.794   3
   1  -8   4 12038.3 233.678   4
   1  -8   4 10839.8 167.634   3
   1  -8   4 11497.3 230.149   2
   1  -8   5 12875.6 324.303   4
   1  -8   5 12481.4 325.180   2
  -1  -8  -5 12749.5 362.232   3
  -1  -8  -6 2719.84 137.448   3
   1  -8   6 2892.74 103.544   4
  -1  -8  -6 3074.58 99.4737   5
   1  -8   6 2593.06 105.757   2
  -1  -8  -7 12845.3 377.357   3
   1  -8   7 12830.7 307.379   4
   1  -8   7 12157.0 303.729   2
   1  -8   8 3834.34 120.663   2
  -1  -8  -8 4877.83 202.168   4
   1  -8   8 4775.97 126.440   4
  -1  -8  -8 4324.16 190.334   3
  -1  -8  -9 2355.78 134.023   3
  -1  -8  -9 2444.96 138.126   4
  -1  -8 -10 2917.96 159.222   4
  -1  -8 -10 2930.38 160.867   3
  -1  -8 -11 558.725 74.1650   3
  -1  -8 -11 589.867 69.8708   4
  -1  -8 -12 7020.21 281.462   4
  -1  -8 -12 6794.38 290.559   3
  -1  -8 -13 3420.61 185.175   4
  -1  -8 -13 3095.50 186.100   3
  -1  -8 -14 19308.3 612.462   3
  -1  -8 -14 19646.9 589.388   4
  -1  -8 -15 10069.9 373.533   4
  -1  -8 -15 9336.57 392.308   3
  -1  -8 -16 11342.4 421.579   4
  -1  -8 -16 11020.5 443.025   3
  -1  -8 -17 5015.65 251.810   4
  -1  -8 -17 4824.42 277.281   3
  -1  -8 -18 8587.54 360.672   4
  -1  -8 -18 8466.36 397.452   3
  -1  -8 -19 4689.93 287.431   3
  -1  -8 -19 4893.33 257.335   4
  -1  -8 -20 864.158 108.028   4
  -1  -8 -20 935.609 134.917   3
  -1  -8 -21 1051.26 134.471   3
   1  -9 -21 3636.56 266.543   3
   1  -9 -20 30.1571 38.0181   3
   1  -9 -19 27.2253 54.8007   3
   1  -9 -18 214.815 72.5944   3
   1  -9 -17 633.670 103.530   3
   1  -9 -17 575.300 85.7260   4
   1  -9 -16-20.6936 28.6671   3
   1  -9 -16 4.59147 45.8566   4
   1  -9 -15 6485.30 293.606   4
   1  -9 -15 6109.07 294.707   3
   1  -9 -14 28.2001 40.7665   4
   1  -9 -14 79.0249 46.7496   3
   1  -9 -13 15986.1 505.354   4
   1  -9 -13 15752.5 511.583   3
   1  -9 -12 21.0144 38.7876   3
  -1  -9  12 18.0851 8.92770   2
   1  -9 -12 25.9058 17.3939   4
   1  -9 -11 4263.15 209.127   3
  -1  -9  11 4365.58 147.308   2
   1  -9 -11 4403.12 208.995   4
  -1  -9  11 4136.00 126.986   4
   1  -9 -10 47.1207 37.8442   3
   1  -9 -10 100.461 39.9908   4
  -1  -9  10 67.3920 21.2470   2
   1  -9 -10 38.5621 25.4303   5
  -1  -9   9 409.779 42.1345   2
   1  -9  -9 364.871 53.2005   3
   1  -9  -9 371.119 57.8614   4
  -1  -9   8 1809.68 93.1694   2
   1  -9  -8 1840.26 118.258   3
   1  -9  -8 1665.47 111.287   4
   1  -9  -7 307.369 44.9594   3
   1  -9  -7 321.918 45.6287   4
  -1  -9   7 310.252 47.7694   2
   1  -9  -6 240.433 43.6105   3
   1  -9  -6 281.876 50.3208   4
  -1  -9   6 177.728 30.6052   2
  -1  -9   5 31765.8 755.848   2
   1  -9  -5 31658.3 772.601   4
   1  -9  -5 29739.5 751.284   3
  -1  -9   4 24.7283 23.8589   2
   1  -9  -4 23.7735 26.2168   4
   1  -9  -4-1.96174 16.7751   3
   1   9  -3 44609.5 985.166   1
  -1  -9   3 39405.1 904.448   3
  -1  -9   3 39697.9 971.623   2
   1  -9  -3 41306.5 962.932   3
   1  -9  -3 42784.1 989.456   4
   1   9  -2 589.240 54.1480   1
   1  -9  -2 578.103 62.1953   4
  -1  -9   2 597.615 38.9794   3
   1  -9  -2 563.357 53.1134   3
   1  -9  -1 57335.3 1307.77   3
  -1  -9   1 61187.2 1297.88   3
   1   9  -1 60330.2 1346.31   1
   1  -9  -1 60137.8 1343.74   4
  -1   9   1 60607.7 1368.36   1
   1   9   0 3834.02 159.974   1
   1  -9   0 3839.25 133.088   3
  -1   9   0 3744.86 166.732   1
   1  -9   0 3878.18 157.538   4
  -1  -9   0 3805.87 136.313   3
   1  -9   1 34761.1 779.638   3
  -1  -9  -1 33927.0 802.410   3
   1  -9   1 35013.2 818.947   4
  -1   9  -1 35588.0 848.481   1
  -1  -9  -2 408.994 43.0415   3
   1  -9   2 404.997 32.1206   3
   1  -9   2 395.663 43.3038   4
  -1   9  -2 352.616 50.5643   1
  -1  -9  -3 10988.0 303.153   3
   1  -9   3 10919.6 291.701   4
   1  -9   3 10331.7 244.431   3
   1  -9   3 9186.30 244.727   3
  -1  -9  -4 123.010 24.1537   3
   1  -9   4 128.194 23.8961   4
   1  -9   4 90.0093 11.2564   3
   1  -9   4 12.8821 8.89381   3
   1  -9   4 126.065 27.6300   2
  -1  -9  -5 1052.11 81.7868   3
   1  -9   5 1072.83 67.0403   2
   1  -9   5 1098.74 68.7873   4
   1  -9   6 869.184 58.4808   2
  -1  -9  -6 875.696 75.0515   3
   1  -9   6 922.917 58.5096   4
   1  -9   7 7186.18 204.376   2
  -1  -9  -7 6990.75 261.215   3
  -1  -9  -7 7294.66 272.287   4
   1  -9   7 7548.63 207.812   4
   1  -9   8 699.311 42.4101   4
   1  -9   8 657.587 39.3683   2
  -1  -9  -8 630.854 71.0689   4
  -1  -9  -8 642.374 72.9054   3
  -1  -9  -9 7395.59 271.530   3
   1  -9   9 6399.38 166.385   2
  -1  -9  -9 7332.50 276.368   4
   1  -9  10 7.68221 6.46272   2
  -1  -9 -10-13.2828 22.5831   4
  -1  -9 -10 11.3024 18.8603   3
  -1  -9 -11 14693.4 478.677   3
  -1  -9 -11 15138.0 477.705   4
  -1  -9 -12 31.8433 24.6327   4
  -1  -9 -12 38.4784 18.5679   3
  -1  -9 -13 4692.73 245.915   3
  -1  -9 -13 4973.51 242.421   4
  -1  -9 -14 277.128 67.8037   3
  -1  -9 -14 273.523 46.5219   4
  -1  -9 -15 1326.16 139.328   3
  -1  -9 -15 1675.89 137.676   4
  -1  -9 -16 48.2782 30.6849   4
  -1  -9 -16 96.9598 56.3473   3
  -1  -9 -17 760.688 87.1808   4
  -1  -9 -17 704.025 99.2536   3
  -1  -9 -18 42.2964 52.2614   3
  -1  -9 -18 14.1240 27.5432   4
  -1  -9 -19 8194.26 415.211   3
  -1  -9 -19 9535.97 401.707   4
  -1  -9 -20 658.809 95.8879   4
  -1  -9 -20 645.974 115.687   3
   1 -10 -20 5875.45 347.803   3
   1 -10 -19 5497.07 320.378   3
   1 -10 -18 5747.56 325.693   3
   1 -10 -18 6485.81 322.875   4
   1 -10 -17 9014.08 404.275   3
   1 -10 -17 10067.6 409.601   4
   1 -10 -16 7151.63 330.049   4
   1 -10 -16 6643.73 325.001   3
   1 -10 -15 1977.16 157.457   4
   1 -10 -15 2035.11 162.715   3
   1 -10 -14 2514.30 178.518   3
   1 -10 -14 2595.46 173.800   4
   1 -10 -13 1435.99 124.472   3
   1 -10 -13 1481.47 124.938   4
   1 -10 -12 178.743 40.8253   3
   1 -10 -12 210.295 40.9673   4
   1 -10 -11 221.229 50.8295   4
  -1 -10  11 220.462 33.7271   2
   1 -10 -11 296.928 53.3437   3
   1 -10 -11 273.105 41.0131   5
   1 -10 -10 4533.77 217.597   3
   1 -10 -10 5300.78 185.865   5
   1 -10 -10 4988.15 230.395   4
  -1 -10  10 4800.33 156.083   4
  -1 -10  10 4827.11 167.615   2
   1 -10  -9 3057.42 166.944   3
   1 -10  -9 3347.29 176.495   4
  -1 -10   9 3326.45 134.627   2
   1 -10  -8 12385.5 388.442   3
  -1 -10   8 12194.7 355.207   2
   1 -10  -8 12131.2 393.865   4
  -1 -10   7 10989.8 339.464   2
   1 -10  -7 10918.9 353.378   3
   1 -10  -7 11090.6 362.776   4
   1 -10  -6 17561.8 500.688   4
   1 -10  -6 17074.5 482.058   3
  -1 -10   6 17593.0 483.817   2
  -1 -10   5 6633.64 235.134   2
   1 -10  -5 6548.14 232.707   3
   1 -10  -5 6402.33 248.026   4
   1 -10  -4 4610.65 180.181   3
  -1 -10   4 4801.92 186.605   2
   1 -10  -4 4488.03 195.560   4
   1 -10  -3 3644.68 153.752   3
  -1 -10   3 3895.27 116.397   3
   1 -10  -3 3999.98 173.146   4
  -1 -10   3 3958.56 163.780   2
   1  10  -3 4214.53 174.563   1
   1  10  -2 316.045 44.2971   1
   1 -10  -2 305.768 46.6242   4
  -1 -10   2 328.949 28.6442   3
   1 -10  -2 212.724 30.4857   3
  -1  10   2 279.969 46.2628   1
   1 -10  -1 48.8616 24.6666   3
   1  10  -1 57.2976 24.9782   1
  -1 -10   1 61.6180 18.3445   3
  -1  10   1 81.2081 38.9438   1
   1 -10  -1 71.3262 34.9724   4
   1 -10   0 111.532 29.9135   4
  -1  10   0 74.3072 30.1416   1
   1  10   0 83.9296 12.7061   1
   1 -10   0 71.4647 15.4756   3
  -1 -10   0 78.4609 23.5791   3
   1 -10   1 1305.33 88.1084   4
   1 -10   1 1341.59 68.4093   3
  -1 -10  -1 1454.48 84.5895   3
  -1  10  -1 1431.18 98.2431   1
  -1 -10  -2 6137.45 209.921   3
  -1  10  -2 6155.26 236.087   1
   1 -10   2 6166.35 214.318   4
   1 -10   2 6131.15 174.037   3
   1 -10   3 10475.2 221.174   3
  -1 -10  -3 10566.8 289.533   3
   1 -10   3 10580.7 281.450   4
  -1 -10  -4 23014.8 365.894   3
   1 -10   4 23719.6 329.938   4
   1 -10   4 22252.2 317.124   2
   1 -10   5 6755.71 210.180   4
   1 -10   5 6217.49 208.096   2
  -1 -10  -5 6218.03 235.054   3
   1 -10   6 10361.8 301.514   2
  -1 -10  -6 10156.8 335.699   3
   1 -10   6 10895.1 294.744   4
   1 -10   7 3833.85 136.242   4
  -1 -10  -7 3708.91 178.878   3
   1 -10   7 3681.96 137.704   2
  -1 -10  -7 3833.90 190.284   4
  -1 -10  -8 6710.49 265.859   3
  -1 -10  -8 6792.43 276.289   4
   1 -10   8 7034.84 200.472   4
   1 -10   8 6909.84 192.769   2
  -1 -10  -9 433.073 67.9512   4
  -1 -10  -9 391.183 61.0838   3
   1 -10   9 461.919 30.4215   2
  -1 -10 -10 180.436 50.9259   4
  -1 -10 -10 222.899 49.4368   3
  -1 -10 -11 127.093 31.1011   3
  -1 -10 -11 199.689 50.9742   4
  -1 -10 -12 3726.76 212.954   3
  -1 -10 -12 3752.65 211.698   4
  -1 -10 -13 1570.78 136.609   4
  -1 -10 -13 1627.60 145.779   3
  -1 -10 -14 5984.64 289.570   4
  -1 -10 -14 6082.55 297.579   3
  -1 -10 -15 9396.34 399.894   3
  -1 -10 -15 9129.33 387.081   4
  -1 -10 -16 7788.97 357.270   4
  -1 -10 -16 7629.29 365.575   3
  -1 -10 -17 8723.55 410.785   3
  -1 -10 -17 8968.96 392.553   4
  -1 -10 -18 8456.14 422.484   3
  -1 -10 -18 9801.40 413.514   4
  -1 -10 -19 3648.68 240.915   4
  -1 -10 -19 2786.17 229.606   3
   1 -11 -19 196.125 74.8752   3
   1 -11 -18 408.063 96.5551   3
   1 -11 -18 440.341 100.792   4
   1 -11 -17 19.0144 49.2171   3
   1 -11 -17 45.9110 38.6841   4
   1 -11 -16 3257.84 217.284   4
   1 -11 -16 3035.23 220.565   3
   1 -11 -15 520.742 91.1584   4
   1 -11 -15 502.177 91.8038   3
   1 -11 -14 9743.65 399.848   4
   1 -11 -14 9713.95 393.172   3
   1 -11 -13 1160.94 116.125   3
   1 -11 -13 1247.52 126.213   4
   1 -11 -12 12730.9 450.085   4
   1 -11 -12 12170.2 437.693   3
   1 -11 -11 649.062 87.7533   3
   1 -11 -11 509.520 74.0834   4
   1 -11 -10 2168.36 148.489   3
   1 -11 -10 2646.12 125.271   5
  -1 -11  10 2596.56 108.855   4
  -1 -11  10 2695.95 115.447   2
   1 -11 -10 2463.27 159.352   4
  -1 -11   9 344.607 40.8804   2
   1 -11  -9 298.876 59.0370   3
   1 -11  -9 297.003 52.9165   4
  -1 -11   9 301.288 40.6991   4
   1 -11  -8 330.635 53.3661   3
  -1 -11   8 448.003 55.7152   2
  -1 -11   8 368.508 47.4238   4
   1 -11  -8 407.433 63.2821   4
   1 -11  -7 1561.20 111.345   3
   1 -11  -7 1601.67 118.559   4
  -1 -11   7 1620.22 112.241   2
   1 -11  -6 6749.10 250.623   3
   1 -11  -6 6570.50 263.088   4
  -1 -11   6 6714.51 252.529   2
  -1 -11   5 3.67231 17.8712   2
   1 -11  -5-0.48596 20.7710   4
   1 -11  -5 25.9071 23.0924   3
  -1 -11   4 13660.4 398.144   2
   1 -11  -4 13162.5 384.708   3
   1 -11  -4 13106.1 410.190   4
   1 -11  -3 202.720 37.8134   3
  -1  11   3 146.216 21.6825   1
   1 -11  -3 220.012 52.1045   4
  -1 -11   3 249.126 26.6773   3
   1  11  -3 224.588 35.6695   1
  -1 -11   3 212.932 39.4002   2
  -1  11   2 29792.0 784.138   1
   1 -11  -2 29959.5 767.982   4
   1  11  -2 30687.7 766.221   1
  -1 -11   2 30686.3 693.225   3
   1 -11  -2 30375.2 733.027   3
   1  11  -1 191.301 33.9567   1
   1 -11  -1 159.985 45.0593   4
  -1  11   1 189.268 38.2622   1
  -1 -11   1 214.569 31.3403   3
   1 -11  -1 200.923 37.4895   3
   1  11   0 17983.8 503.948   1
  -1  11   0 17925.3 515.598   1
  -1 -11   0 18531.8 461.500   3
   1 -11   0 17960.9 452.879   3
   1 -11   0 17464.6 490.719   4
   1  11   1 517.989 63.2510   1
   1 -11   1 561.389 61.5667   4
  -1  11  -1 568.822 71.2775   1
  -1 -11  -1 660.123 61.2011   3
   1 -11   1 604.461 48.6385   3
  -1 -11  -2 6038.41 214.180   3
   1 -11   2 6015.37 175.148   3
   1 -11   2 5875.40 218.165   4
  -1  11  -2 6225.14 247.430   1
  -1 -11  -3 28.3568 22.7639   3
   1 -11   3 41.7385 13.5366   3
   1 -11   3 15.7864 19.1969   3
   1 -11   3 69.3923 26.5730   4
  -1 -11  -4 744.736 70.8167   3
   1 -11   4 578.441 54.8996   4
   1 -11   4 361.433 21.7663   3
   1 -11   4 558.249 55.3186   2
   1 -11   5 803.920 59.9436   4
  -1 -11  -5 935.035 80.2055   4
  -1 -11  -5 838.430 78.1995   3
   1 -11   5 810.931 66.4632   2
  -1 -11  -6 4604.10 218.166   4
   1 -11   6 4559.54 177.738   2
  -1 -11  -6 4778.94 208.058   3
   1 -11   6 4881.73 174.361   4
  -1 -11  -7 1170.25 100.930   3
  -1 -11  -7 1218.30 104.994   4
   1 -11   7 1240.82 77.5379   2
   1 -11   7 1244.32 76.3472   4
   1 -11   8 19564.5 469.409   4
   1 -11   8 18606.0 459.556   2
  -1 -11  -8 19074.9 571.803   4
  -1 -11  -8 18133.7 549.397   3
  -1 -11  -9 894.423 95.8131   3
  -1 -11  -9 791.939 91.2570   4
  -1 -11 -10 15755.5 515.770   3
  -1 -11 -10 17098.8 534.692   4
  -1 -11 -11 2677.56 174.866   3
  -1 -11 -11 2911.26 182.777   4
  -1 -11 -12 10096.8 396.093   3
  -1 -11 -12 10681.4 405.749   4
  -1 -11 -13 1290.37 128.783   3
  -1 -11 -13 1200.17 120.717   4
  -1 -11 -14 2157.42 177.398   3
  -1 -11 -14 2385.25 176.830   4
  -1 -11 -15 388.897 73.3585   4
  -1 -11 -15 441.979 94.4333   3
  -1 -11 -16 69.6188 69.5855   3
  -1 -11 -16 94.8249 33.5738   4
  -1 -11 -17 72.8589 69.1403   3
  -1 -11 -17 91.5163 50.1437   4
  -1 -11 -18 2045.72 196.582   3
  -1 -11 -18 2569.24 205.476   4
  -1 -11 -19 224.687 51.2306   4
  -1 -11 -20 5723.42 333.481   4
   1 -12 -18 7781.45 404.863   3
   1 -12 -18 10082.1 444.209   4
   1 -12 -17 3451.35 247.929   3
   1 -12 -17 4000.53 258.111   4
   1 -12 -16 4966.99 284.881   3
   1 -12 -16 5409.10 298.683   4
   1 -12 -15 242.051 54.6812   4
   1 -12 -15 284.054 54.1007   3
   1 -12 -14 1200.86 126.233   3
   1 -12 -14 1071.39 118.408   4
   1 -12 -13 260.650 63.6825   3
   1 -12 -13 258.641 57.1948   4
   1 -12 -12 828.744 97.4566   3
   1 -12 -12 803.573 96.9375   4
   1 -12 -11 3121.66 191.028   3
   1 -12 -11 3272.84 206.546   4
   1 -12 -10 519.812 75.4902   4
   1 -12 -10 606.115 59.5437   5
   1 -12 -10 520.074 73.8240   3
  -1 -12   9 10310.4 312.295   2
  -1 -12   9 10015.2 293.601   4
   1 -12  -9 9708.59 369.250   4
   1 -12  -9 8840.83 344.776   3
   1 -12  -8 2949.88 166.414   3
  -1 -12   8 2970.90 137.299   4
  -1 -12   8 2696.15 141.828   2
   1 -12  -8 2663.38 170.658   4
  -1 -12   7 16752.2 503.235   2
  -1 -12   7 17486.1 469.576   4
   1 -12  -7 17283.7 508.558   3
   1 -12  -7 16999.4 530.000   4
   1 -12  -6 3087.99 172.173   4
  -1 -12   6 2733.84 138.941   4
   1 -12  -6 2980.36 159.785   3
  -1 -12   6 3059.45 162.281   2
   1 -12  -5 8956.86 327.649   4
  -1 -12   5 8777.22 307.385   2
   1 -12  -5 8872.66 303.929   3
   1 -12  -4 943.314 83.6331   3
  -1 -12   4 851.284 76.8306   2
   1 -12  -4 880.110 82.5214   4
   1 -12  -3 229.250 45.4770   3
  -1 -12   3 226.027 43.1511   2
   1 -12  -3 207.979 48.2538   4
  -1  12   3 308.909 48.2392   1
  -1 -12   3 127.770 23.2861   3
   1  12  -3 180.961 28.3611   1
   1  12  -2 1137.84 95.7064   1
  -1  12   2 1048.35 94.4426   1
  -1 -12   2 1132.17 61.7811   3
   1 -12  -2 1153.54 98.1507   4
  -1 -12   2 1154.00 91.0284   2
   1 -12  -2 1106.06 78.6338   3
   1 -12  -1 2158.76 131.146   4
  -1 -12   1 2373.71 102.499   3
  -1  12   1 2272.36 144.201   1
   1 -12  -1 2245.74 112.157   3
   1  12  -1 2263.30 134.511   1
   1  12   0 47.4061 31.7742   1
   1 -12   0 41.3269 20.3113   3
   1 -12   0 92.7555 39.9110   4
  -1 -12   0 101.584 32.7026   3
  -1  12   0 23.9268 27.1963   1
  -1  12  -1 7305.98 286.249   1
   1 -12   1 7795.73 226.145   3
  -1 -12  -1 7700.60 250.384   3
   1 -12   1 7062.92 264.157   4
   1  12   1 7785.89 286.292   1
   1 -12   2 554.091 44.3847   3
  -1  12  -2 515.547 71.3641   1
  -1 -12  -2 566.575 61.5788   3
   1 -12   2 536.503 67.6378   4
   1 -12   3 14918.1 435.356   4
  -1 -12  -3 15183.1 440.007   3
   1 -12   3 15557.3 363.172   3
  -1 -12  -3 14798.6 468.054   4
  -1 -12  -4 1998.57 136.843   4
   1 -12   4 2131.19 120.517   4
   1 -12   4 1979.39 117.833   2
  -1 -12  -4 2118.24 128.542   3
   1 -12   5 19339.9 505.129   4
  -1 -12  -5 18241.4 562.539   4
  -1 -12  -5 19267.5 540.219   3
   1 -12   5 18640.7 504.849   2
  -1 -12  -6 517.988 68.0386   4
   1 -12   6 467.937 50.0905   4
   1 -12   6 525.977 58.9254   2
  -1 -12  -6 566.645 69.9866   3
  -1 -12  -7 6436.16 287.008   4
  -1 -12  -7 6612.40 272.766   3
   1 -12   7 7003.70 234.751   2
   1 -12   7 6946.56 225.476   4
   1 -12   8 9.87433 15.9740   4
  -1 -12  -8 27.6205 33.6186   3
  -1 -12  -8 8.72858 30.4351   4
  -1 -12  -9 537.912 89.5129   4
  -1 -12  -9 572.251 82.1331   3
  -1 -12 -10 2204.65 155.516   4
  -1 -12 -10 1938.63 146.396   3
  -1 -12 -11 759.414 99.4965   4
  -1 -12 -11 723.296 93.9882   3
  -1 -12 -12 2847.41 192.088   4
  -1 -12 -12 2966.24 193.714   3
  -1 -12 -13 4259.25 246.841   3
  -1 -12 -13 4204.98 245.429   4
  -1 -12 -14 5604.92 305.929   3
  -1 -12 -14 6194.72 310.961   4
  -1 -12 -15 6587.66 342.801   3
  -1 -12 -15 7334.06 358.749   4
  -1 -12 -16 6853.13 357.424   3
  -1 -12 -16 7876.26 371.793   4
  -1 -12 -17 6280.19 337.449   4
  -1 -12 -17 5355.32 322.834   3
  -1 -12 -18 4491.39 288.489   4
   1 -13 -17 1211.34 147.335   3
   1 -13 -17 1279.18 159.160   4
   1 -13 -16 574.916 104.253   3
   1 -13 -16 453.250 93.9081   4
   1 -13 -15 4275.55 266.882   3
   1 -13 -15 4876.57 282.767   4
   1 -13 -14 4014.46 257.255   4
   1 -13 -14 4067.15 249.330   3
   1 -13 -13 10850.6 439.541   3
   1 -13 -13 11931.6 459.645   4
   1 -13 -12 4405.04 254.799   4
   1 -13 -12 4404.45 247.553   3
   1 -13 -11 11676.6 437.389   4
   1 -13 -11 10428.3 405.542   3
   1 -13 -10 2730.25 180.916   4
   1 -13 -10 2675.28 174.535   3
   1 -13  -9 2294.13 167.866   4
   1 -13  -9 2308.18 156.964   3
   1 -13  -8 1364.20 113.948   3
  -1 -13   8 1348.60 94.9374   4
  -1 -13   8 1399.19 105.523   2
   1 -13  -8 1373.38 124.011   4
   1 -13  -7 2.46056 24.8888   3
  -1 -13   7 21.6518 16.6420   4
   1 -13  -7 9.26954 23.6336   4
  -1 -13   7-3.81111 21.5765   2
   1 -13  -6 590.632 70.1444   3
  -1 -13   6 537.175 65.0661   2
   1 -13  -6 543.812 72.0047   4
  -1 -13   6 567.932 56.9398   4
  -1 -13   5 1675.55 107.141   4
   1 -13  -5 1633.91 116.304   3
  -1 -13   5 1545.31 116.292   2
   1 -13  -5 1702.80 130.061   4
  -1  13   4 66.8247 26.1538   1
   1 -13  -4 101.445 33.2146   3
  -1 -13   4 100.114 32.8689   2
  -1 -13   4 70.6995 33.8307   4
   1 -13  -4 69.8890 36.7084   4
  -1  13   3 9814.99 357.630   1
  -1 -13   3 9210.53 329.174   2
  -1 -13   3 9463.82 332.009   4
   1 -13  -3 10080.5 316.502   3
   1 -13  -3 9311.65 342.962   4
   1 -13  -2 135.289 43.4099   4
  -1  13   2 143.084 30.4278   1
   1 -13  -2 96.7116 41.1481   3
  -1 -13   2 144.839 43.0595   2
   1  13  -2 146.948 37.2197   1
  -1 -13   2 137.155 35.4385   4
  -1 -13   1 15074.8 382.042   3
  -1  13   1 13858.1 455.875   1
   1  13  -1 13945.9 441.050   1
   1 -13  -1 14395.4 397.310   3
   1 -13  -1 13631.5 439.133   4
  -1 -13   1 13267.2 433.959   4
   1  13   0 79.1127 36.8787   1
   1 -13   0 133.809 34.2249   3
   1 -13   0 111.861 44.6032   4
  -1  13   0 120.726 33.9711   1
  -1 -13   0 75.9943 36.5988   4
  -1 -13   0 111.027 34.1205   3
  -1  13  -1 6015.35 267.492   1
   1  13   1 6380.22 264.445   1
  -1 -13  -1 6043.84 259.320   4
   1 -13   1 6590.26 208.343   3
   1 -13   1 6318.91 249.201   4
  -1 -13  -1 6584.34 231.346   3
  -1  13  -2-9.66165 36.0831   1
   1  13   2 34.3026 23.3291   1
  -1 -13  -2 15.9882 25.1405   4
   1 -13   2 30.8789 30.5319   4
  -1 -13  -2-9.47426 22.1414   3
   1 -13   3 1070.15 86.2528   4
  -1 -13  -3 1027.36 92.7593   4
   1 -13   3 1177.39 95.1966   2
  -1 -13  -3 1157.50 92.8872   3
   1 -13   4 2671.03 144.976   2
   1 -13   4 3028.73 151.832   4
  -1 -13  -4 2843.99 157.425   3
  -1 -13  -4 2358.82 156.259   4
   1 -13   5 1812.79 113.157   4
  -1 -13  -5 1399.27 113.588   4
  -1 -13  -5 1703.18 121.486   3
   1 -13   5 1586.81 106.934   2
  -1 -13  -6 2225.29 155.284   4
  -1 -13  -6 2335.68 149.132   3
   1 -13   6 2191.84 120.561   4
   1 -13   6 2171.67 129.790   2
  -1 -13  -7 5649.04 277.489   4
  -1 -13  -7 5793.95 261.689   3
   1 -13   7 6529.01 223.436   4
  -1 -13  -8 3907.04 215.420   3
  -1 -13  -8 4123.36 231.086   4
  -1 -13  -9 13637.9 477.679   4
  -1 -13  -9 12532.2 452.009   3
  -1 -13 -10 4249.33 238.770   3
  -1 -13 -10 4677.65 256.226   4
  -1 -13 -11 8509.45 365.405   3
  -1 -13 -11 9470.43 392.998   4
  -1 -13 -12 2653.11 194.947   3
  -1 -13 -12 3064.57 206.018   4
  -1 -13 -13 6452.68 326.538   4
  -1 -13 -13 5836.59 307.694   3
  -1 -13 -14 2027.72 181.289   4
  -1 -13 -14 1892.10 172.211   3
  -1 -13 -15 80.8249 59.8739   3
  -1 -13 -15 53.0170 51.8704   4
  -1 -13 -16-1.39860 63.8083   3
  -1 -13 -16 9.85551 60.7175   4
   1 -14 -16 1221.73 146.516   3
   1 -14 -15 385.715 81.5209   3
   1 -14 -15 398.915 89.0668   4
   1 -14 -14 44.3090 51.3674   3
   1 -14 -14 147.115 71.0911   4
   1 -14 -13 629.482 91.1253   3
   1 -14 -13 703.947 99.2877   4
   1 -14 -12 1556.10 151.591   4
   1 -14 -12 1305.05 129.977   3
   1 -14 -11 106.630 54.8538   4
   1 -14 -11 56.6645 33.4074   3
   1 -14 -10 8082.10 344.455   3
   1 -14 -10 8707.96 374.068   4
   1 -14  -9 255.805 63.5057   4
   1 -14  -9 172.656 56.6348   3
   1 -14  -8 11048.8 398.936   3
   1 -14  -8 10944.6 421.624   4
  -1 -14   7 272.895 40.3870   4
   1 -14  -7 431.663 76.0077   4
  -1 -14   7 428.746 72.6377   2
   1 -14  -7 319.643 58.6703   3
  -1 -14   6 15463.4 487.258   2
   1 -14  -6 14986.7 501.746   4
   1 -14  -6 15163.4 472.004   3
  -1 -14   6 14382.1 442.831   4
  -1  14   5 30.2894 22.6619   1
   1 -14  -5 77.7837 41.5416   3
  -1 -14   5 89.8945 33.6688   2
  -1 -14   5 1.53976 23.8857   4
   1 -14  -5 49.2439 38.3634   4
   1 -14  -4 5688.63 263.106   4
  -1 -14   4 6080.33 246.290   4
  -1 -14   4 5774.65 248.407   2
   1 -14  -4 5736.65 237.093   3
  -1  14   4 5376.48 260.546   1
  -1  14   3 80.9233 28.1409   1
  -1 -14   3 113.262 25.2819   4
   1 -14  -3 78.2111 23.9548   4
  -1 -14   3 84.3517 38.7628   2
   1 -14  -3 121.255 37.4800   3
  -1 -14   2 119.046 30.7722   4
   1  14  -2 133.420 43.4531   1
  -1  14   2 205.964 45.0398   1
  -1 -14   2 152.831 39.0954   2
   1 -14  -2 162.977 27.9728   4
   1 -14  -2 144.506 29.3515   3
   1 -14  -1 1651.97 103.357   3
   1 -14  -1 1554.77 119.305   4
  -1 -14   1 1329.05 104.845   4
  -1  14   1 1636.80 133.333   1
   1  14  -1 1408.26 117.312   1
  -1 -14   1 1398.13 115.084   2
   1 -14   0 7486.86 300.648   4
  -1 -14   0 7343.26 302.471   4
  -1  14   0 8279.49 328.081   1
  -1 -14   0 8594.75 265.485   3
   1  14   0 7855.40 310.770   1
  -1 -14  -1 851.264 90.2157   4
   1 -14   1 916.115 85.5942   4
  -1 -14  -1 1007.91 81.3710   3
   1  14   1 907.195 91.2802   1
  -1  14  -1 878.727 90.1189   1
  -1 -14  -2 9073.05 357.330   4
   1  14   2 9660.20 361.484   1
   1 -14   2 9480.20 340.489   4
  -1 -14  -2 10740.0 334.000   3
  -1 -14  -3 2017.77 144.615   4
  -1 -14  -3 2377.21 139.890   3
   1 -14   3 1930.33 129.775   2
   1 -14   3 2140.90 137.410   4
   1  14   3 1884.09 142.483   1
   1 -14   4 14858.8 460.897   2
  -1 -14  -4 14060.5 494.400   4
  -1 -14  -4 16363.4 480.595   3
   1 -14   4 16287.1 469.866   4
  -1 -14  -5 590.356 77.4018   3
  -1 -14  -5 289.646 50.3380   4
   1 -14   5 460.392 72.1689   2
   1 -14   5 581.839 73.0818   4
  -1 -14  -6 15589.4 504.726   3
   1 -14   6 16485.7 462.447   4
  -1 -14  -6 15549.9 526.841   4
  -1 -14  -7 1406.18 124.999   3
  -1 -14  -7 1444.82 135.198   4
  -1 -14  -8 4710.52 246.271   3
  -1 -14  -8 5112.72 267.089   4
  -1 -14  -9 156.954 59.9149   3
  -1 -14  -9 79.5149 42.2526   4
  -1 -14 -10 298.517 65.1449   3
  -1 -14 -10 365.548 73.5454   4
  -1 -14 -11 456.513 81.2359   3
  -1 -14 -11 509.945 89.6113   4
  -1 -14 -12 2174.93 180.318   3
  -1 -14 -12 2548.07 204.657   4
  -1 -14 -13 893.936 128.104   3
  -1 -14 -13 1064.96 139.134   4
  -1 -14 -14 4159.45 270.768   4
  -1 -14 -14 3541.05 245.567   3
  -1 -14 -15 1115.62 145.150   4
  -1 -14 -15 910.267 131.541   3
   1 -15 -14 6458.77 340.806   3
   1 -15 -13 4698.47 290.530   4
   1 -15 -13 4104.70 264.805   3
   1 -15 -12 11878.5 488.050   4
   1 -15 -12 11180.3 457.505   3
   1 -15 -11 3404.53 223.875   3
   1 -15 -11 3704.40 239.348   4
   1 -15 -10 6506.30 312.965   3
   1 -15 -10 7014.95 344.094   4
   1 -15  -9 1670.01 143.726   3
   1 -15  -9 1806.91 167.239   4
   1 -15  -8 2859.96 204.215   4
   1 -15  -8 2640.05 177.962   3
   1 -15  -7 0.11469 25.5956   4
   1 -15  -7 2.36166 40.7388   3
  -1 -15   6 17.5035 43.9855   4
   1 -15  -6 68.8257 44.0104   3
  -1  15   6 6.40168 25.1979   1
   1 -15  -6 84.6080 50.2975   4
  -1  15   5 172.400 54.9322   1
  -1 -15   5 99.9668 20.7317   4
  -1 -15   5 191.477 51.2121   2
   1 -15  -5 282.526 72.6054   4
   1 -15  -5 228.488 52.3846   3
  -1 -15   4 2424.99 153.526   4
   1 -15  -4 2419.43 170.707   4
   1 -15  -4 2672.12 155.763   3
  -1  15   4 2408.69 175.424   1
  -1 -15   4 2458.51 161.144   2
   1 -15  -3 1561.92 131.487   4
  -1  15   3 1584.82 141.041   1
  -1 -15   3 1725.88 132.695   4
  -1 -15   3 1684.62 128.300   2
   1 -15  -3 1825.58 131.114   3
  -1 -15   2 8778.77 338.625   4
   1  15  -2 9324.53 350.171   1
  -1  15   2 9023.02 361.735   1
   1 -15  -2 8520.61 344.942   4
  -1 -15   2 8748.36 340.564   2
  -1 -15   1 1409.92 119.449   4
   1 -15  -1 1475.16 125.332   4
  -1 -15   1 1338.38 119.553   2
  -1  15   1 1539.54 131.032   1
   1  15  -1 1413.69 121.376   1
   1 -15   0 8110.23 325.715   4
  -1 -15   0 8018.20 331.540   4
   1  15   0 8845.42 338.970   1
  -1  15   0 8266.96 346.870   1
   1  15   1 827.689 93.0347   1
  -1  15  -1 817.413 95.9950   1
   1 -15   1 884.264 93.4426   4
  -1 -15  -1 740.074 87.9701   4
  -1 -15  -2 1101.80 113.125   4
   1  15   2 1268.27 114.141   1
   1 -15   2 1279.38 110.674   4
   1 -15   2 1285.69 114.698   2
  -1 -15  -3 138.735 20.0860   4
  -1 -15  -3 277.245 61.7659   3
   1 -15   3 199.274 52.2410   2
   1 -15   3 203.994 41.6880   4
   1  15   3 188.771 49.1354   1
  -1 -15  -4 7.96054 35.5610   3
  -1 -15  -4-16.5328 54.9636   4
   1 -15   4 61.0803 46.8442   4
   1  15   4 37.7270 47.5455   1
  -1 -15  -5 890.412 94.0159   4
  -1 -15  -5 987.288 101.945   3
   1 -15   5 1261.03 108.675   4
  -1 -15  -6 2109.91 151.790   3
  -1 -15  -6 1777.74 150.367   4
  -1 -15  -7 3495.41 209.906   3
  -1 -15  -7 3345.03 215.062   4
  -1 -15  -8 6463.53 304.468   3
  -1 -15  -8 6383.95 320.442   4
  -1 -15  -9 5223.67 292.136   4
  -1 -15  -9 5336.07 275.973   3
  -1 -15 -10 7962.01 362.257   3
  -1 -15 -10 8623.08 391.470   4
  -1 -15 -11 2930.92 206.326   3
  -1 -15 -11 2914.57 223.218   4
  -1 -15 -12 7416.45 357.503   3
  -1 -15 -12 7463.54 376.787   4
  -1 -15 -13 2106.25 194.348   3
  -1 -15 -13 2723.66 230.089   4
  -1 -15 -14 1727.28 169.801   3
   1 -16 -13 12.8915 52.8726   3
   1 -16 -12 44.9295 32.7737   3
   1 -16 -11 3806.84 242.263   3
   1 -16 -11 4433.98 278.750   4
   1 -16 -10 39.2576 51.9240   3
   1 -16 -10 82.2206 76.5363   4
   1 -16  -9 14793.6 534.798   3
   1 -16  -9 16245.5 582.355   4
   1 -16  -8 428.977 96.2501   4
  -1  16   8 290.701 66.1886   1
   1 -16  -8 421.608 94.4275   3
   1 -16  -7 15719.4 568.840   4
  -1  16   7 15629.4 571.714   1
   1 -16  -7 16915.6 545.658   3
   1 -16  -6 231.027 69.0891   4
   1 -16  -6 136.978 60.1489   3
   1 -16  -5 7451.74 303.663   3
  -1  16   5 6809.88 332.725   1
  -1 -16   5 7128.62 289.739   4
   1 -16  -5 6478.68 317.858   4
   1 -16  -4 0.34172 29.8266   4
  -1  16   4-36.9597 49.1872   1
  -1 -16   4 24.0873 32.6409   2
  -1 -16   4 22.6275 36.4525   4
   1 -16  -3 2096.03 167.044   4
  -1 -16   3 2420.22 166.841   2
  -1 -16   3 2277.44 154.571   4
  -1  16   3 2651.08 186.951   1
  -1 -16   2 19.6725 43.0697   4
  -1  16   2-38.2838 51.0368   1
   1 -16  -2 40.9996 34.6218   4
  -1 -16   2 77.7363 28.5782   2
  -1 -16   1 35.3536 36.8701   4
  -1 -16   1 52.3082 27.8992   2
  -1  16   1 43.2383 42.6931   1
   1  16  -1 43.2065 40.6681   1
   1 -16  -1 61.9325 34.4518   4
   1  16   0 64.5280 49.6753   1
  -1  16   0 63.6979 24.5799   1
  -1 -16   0 21.1560 45.3854   4
  -1 -16   0-0.31872 28.6683   2
   1 -16   0 42.4260 29.3844   4
   1 -16   1 4197.05 221.734   4
  -1 -16  -1 3672.28 217.924   4
   1 -16   1 4145.89 217.252   2
   1 -16   2 159.132 50.1476   4
   1 -16   2 178.664 60.5935   2
  -1 -16  -2 101.339 47.7849   4
   1  16   2 176.650 50.7979   1
   1  16   3 12399.6 454.836   1
   1 -16   3 13073.7 438.026   4
  -1 -16  -3 11722.1 458.639   4
   1 -16   4 245.323 86.5731   4
  -1 -16  -4 102.700 40.9321   4
   1  16   4 115.399 44.3499   1
  -1 -16  -5 17850.4 552.842   3
  -1 -16  -5 15823.7 570.223   4
   1  16   5 16885.6 576.467   1
  -1 -16  -6 483.259 93.2040   3
  -1 -16  -6 486.284 94.5918   4
   1  16   6 362.146 68.4449   1
  -1 -16  -7 18012.2 631.827   4
  -1 -16  -7 18980.4 609.386   3
  -1 -16  -8 306.925 76.1406   3
  -1 -16  -8 192.334 71.4843   4
  -1 -16  -9 3439.06 222.400   3
  -1 -16  -9 3750.31 252.806   4
  -1 -16 -10 53.8395 43.8832   3
  -1 -16 -10 194.225 84.2298   4
  -1 -16 -11 42.2985 49.0905   3
  -1 -16 -12 638.147 104.420   3
  -1 -16 -13 1638.53 173.195   3
   1 -17 -12 2055.28 191.849   3
   1 -17 -11 7181.18 366.808   3
  -1  17  10 2319.78 175.293   1
   1 -17 -10 2590.87 207.098   3
   1 -17  -9 3689.78 239.980   3
  -1  17   9 3426.26 241.552   1
  -1  17   8 769.877 113.532   1
   1 -17  -8 1044.73 143.862   4
  -1  17   7 457.735 99.7476   1
   1 -17  -7 582.549 113.352   4
  -1  17   6 288.804 58.5535   1
   1 -17  -6 260.844 61.3544   4
  -1  17   5 616.166 101.010   1
   1 -17  -5 673.117 103.846   4
  -1 -17   4 2801.53 189.506   4
   1 -17  -4 2700.53 194.825   4
  -1 -17   3 1261.81 118.214   4
  -1  17   3 1270.20 128.975   1
   1 -17  -3 1137.52 134.760   4
  -1 -17   2 5489.36 268.536   4
  -1  17   2 4966.79 277.040   1
  -1 -17   2 5111.13 269.318   2
   1 -17  -2 4754.31 266.574   4
   1 -17  -1 2075.11 170.485   4
  -1 -17   1 2165.32 169.061   4
  -1  17   1 2261.67 180.220   1
  -1 -17   1 2022.68 164.872   2
  -1 -17   0 4689.10 250.690   4
  -1  17   0 5023.58 271.332   1
  -1 -17   0 4659.43 257.203   2
   1 -17   0 4692.97 258.803   4
   1 -17   1 1005.58 120.550   4
  -1 -17  -1 784.630 108.155   2
  -1 -17  -1 784.823 101.147   4
   1  17   1 939.641 108.319   1
  -1 -17  -2 387.061 65.6114   4
   1 -17   2 629.310 94.8260   4
   1  17   3 355.578 56.7312   1
   1 -17   3 341.969 74.6009   4
  -1 -17  -3 237.389 57.9936   4
  -1 -17  -4 58.2750 48.6568   4
   1  17   4-14.3952 53.2069   1
  -1 -17  -5 878.533 122.195   4
   1  17   5 982.120 121.545   1
  -1 -17  -6 1194.53 135.489   4
  -1 -17  -7 4756.03 287.339   4
   1  17   7 5236.76 297.686   1
  -1 -17  -8 3839.59 259.244   4
  -1 -17  -9 7921.50 375.736   3
  -1 -17 -10 4796.20 285.664   3
  -1 -17 -11 5720.66 320.792   3
  -1  18   6 10357.3 451.745   1
   1 -18  -5-7.58594 34.2835   4
  -1  18   5 52.6608 62.0571   1
  -1  18   4 6345.99 327.729   1
   1 -18  -4 5677.69 305.963   4
  -1  18   3-18.9132 31.4979   1
   1 -18  -3-27.2940 36.6161   4
  -1  18   2 533.156 95.1228   1
   1 -18  -2 664.627 97.2167   4
  -1 -18   2 503.726 83.2448   4
  -1 -18   1 93.3573 52.3275   2
  -1  18   1-21.1761 63.5908   1
  -1 -18   1-46.3894 28.4492   4
   1 -18  -1 138.481 56.3084   4
   1  18   0 2032.92 159.343   1
  -1 -18   0 2030.79 170.060   2
  -1 -18   0 1894.82 156.202   4
  -1 -18  -1 37.2189 26.0708   2
   1 -18   1 59.1230 32.0542   4
   1  18   1-41.8450 38.5424   1
   1  18   2 8898.61 384.815   1
  -1 -18  -2 8021.70 383.194   2
   1  18   3 132.179 42.0499   1
  -1 -18  -3 172.440 62.8838   4
   1  18   4 11732.3 468.137   1
  -1 -18  -4 11404.9 479.606   4
  -1 -18  -5 121.160 55.0356   4
   1  18   5 227.615 85.9346   1
   1  18   6 10006.3 435.556   1
   1  18   8 4818.40 294.238   1
  -1  19   4 258.292 76.7059   1
  -1  19   3 3670.64 260.983   1
   1 -19  -2 964.144 117.143   4
  -1  19   2 700.418 99.2424   1
   1 -19  -1 5615.48 308.250   4
  -1 -19   0 345.728 87.6230   4
  -1 -19  -1 3014.51 228.428   2
  -1 -19  -2 257.505 63.6999   2
  -1 -19  -3 426.123 89.9831   2
   2   0 -25 70.1697 54.0547   3
   2   0 -24 4565.78 259.862   3
   2   0 -23-3.00778 37.5633   3
   2   0 -22 3622.76 217.909   3
   2   0 -21 80.2488 48.2720   3
   2   0 -20 289.659 58.3404   3
   2   0 -19 9.80401 28.9560   3
   2   0 -18 3162.74 178.252   3
   2   0 -17 38.5879 35.6928   3
   2   0 -16 5762.56 233.080   3
   2   0 -15 27.0243 28.5124   3
   2   0 -14 13934.1 405.843   3
   2   0 -13 18.2445 17.2704   3
  -2   0  12 4383.05 143.857   4
   2   0 -12 4498.84 172.805   3
  -2   0  11 12.8839 17.3114   4
   2   0 -11 17.6065 20.5883   3
  -2   0  10 5260.48 157.832   4
   2   0 -10 5273.27 184.009   2
  -2   0  10 5143.37 176.966   2
   2   0 -10 5494.72 181.712   3
  -2   0   9 28.7247 17.4190   4
   2   0  -9-8.75044 14.9606   3
   2   0  -9 10.3855 16.0529   2
  -2   0   9 5.30895 18.7246   2
  -2   0   8 14934.3 374.379   2
  -2   0   8 14941.9 354.895   4
   2   0  -8 14253.4 370.119   2
   2   0  -7 12.9377 19.3031   2
  -2   0   7 0.93297 13.4561   2
  -2   0   7 1.77697 9.49205   4
   2   0  -6 21989.0 516.393   5
  -2   0   6 23653.2 518.848   2
   2   0  -6 20754.4 517.377   2
   2   0  -5 6.66880 8.75599   5
   2   0  -5 27.6222 11.5333   2
  -2   0   5 7.72307 14.0164   2
  -2   0   4 66952.9 1430.35   2
   2   0  -4 66296.3 1428.69   2
  -2   0   3 33.9149 11.3821   2
   2   0  -3 13.0287 10.2365   2
  -2   0   2 123846. 2644.34   2
   2   0  -2 126902. 2642.73   2
  -2   0   1 6.01724 8.41810   3
   2   0  -1 9.95978 8.14665   2
   2   0  -1 3.33038 5.83226   1
   2   0  -1 17.1994 8.00923   3
  -2   0   1 4.06261 8.00494   2
  -2   0   0 70845.6 1502.62   3
   2   0   0 70811.9 1492.80   2
  -2   0   0 73804.0 1494.31   2
   2   0   1 39.6540 12.2820   3
  -2   0  -1 7.26938 8.92434   3
   2   0   1-5.48794 9.59303   2
  -2   0  -1 6.05962 8.33623   2
   2   0   2 4234.53 124.432   3
  -2   0  -2 4584.28 126.893   3
   2   0   3 23.0911 11.4661   3
  -2   0  -3 13.5085 13.1105   3
   2   0   4 5505.36 159.124   3
  -2   0  -4 5768.33 163.249   3
   2   0   5 14.0293 12.1684   3
  -2   0  -5 4.17508 11.4883   3
   2   0   6 8532.52 232.830   3
  -2   0  -6 8648.32 238.304   3
  -2   0  -7-0.06389 11.7590   3
   2   0   7 15.0932 15.6629   3
  -2   0  -8 3874.05 144.779   3
   2   0   8 3820.99 140.889   3
  -2   0  -9 18.0058 12.9113   4
  -2   0  -9-0.52411 11.9221   3
  -2   0 -10 17019.6 426.097   2
  -2   0 -10 16841.3 451.994   3
  -2   0 -10 17134.4 402.783   4
  -2   0 -11 4.50410 12.5350   3
  -2   0 -11 24.1899 28.0664   2
  -2   0 -11 11.6574 16.0165   4
  -2   0 -12 11345.3 290.136   4
  -2   0 -12 10932.0 343.472   3
  -2   0 -13 22.9547 28.4501   3
  -2   0 -13-9.72718 13.6125   4
  -2   0 -14 837.327 82.9041   3
  -2   0 -15 22.9227 25.8665   3
  -2   0 -16 149.269 41.0777   3
  -2   0 -17 7.37023 22.8172   3
  -2   0 -18 5233.11 252.346   3
  -2   0 -19 26.8285 35.9551   3
  -2   0 -20 5866.51 290.650   3
  -2   0 -21-17.7408 28.4357   3
  -2   0 -22 4776.37 272.470   3
  -2   0 -23-10.8217 27.8717   3
  -2   0 -24 992.350 137.371   3
   2  -1 -25 307.379 57.9107   3
   2   1 -24 3670.75 231.188   3
   2  -1 -24 3391.97 230.716   3
   2  -1 -23 3040.51 207.704   3
   2   1 -23 3347.50 207.792   3
   2  -1 -22 7885.99 356.882   3
   2   1 -22 9035.15 356.687   3
   2  -1 -21 10425.1 410.047   3
   2   1 -21 10879.1 394.619   3
   2   1 -20 12101.9 412.969   3
   2  -1 -20 11242.9 417.750   3
   2   1 -19 13899.4 445.649   3
   2  -1 -19 13427.8 457.618   3
   2   1 -18 20703.5 581.169   3
   2  -1 -18 20102.5 596.998   3
   2   1 -17 5186.81 219.811   3
   2  -1 -17 5200.10 232.405   3
   2   1 -16 3886.54 176.758   3
   2  -1 -16 3830.65 191.088   3
   2   1 -15 952.966 79.2540   3
   2  -1 -15 868.246 80.6931   3
   2   1 -14 264.361 37.2943   3
   2  -1 -14 197.211 31.4875   3
   2   1 -13 52.2973 19.7106   3
  -2  -1  13 37.2563 11.4569   4
   2  -1 -13 103.502 33.8608   3
   2  -1 -12 2191.92 117.514   3
   2   1 -12 2313.42 108.983   3
  -2  -1  12 2169.18 87.1536   4
  -2  -1  11 8209.66 253.348   2
  -2  -1  11 8597.53 227.150   4
   2   1 -11 8991.53 258.332   3
  -2   1  11 8981.05 240.065   4
   2  -1 -11 8491.08 268.487   3
   2   1 -11 7925.21 260.625   2
   2  -1 -10 6686.07 213.799   3
  -2   1  10 6128.25 185.251   4
  -2  -1  10 6392.05 201.789   2
   2   1 -10 6299.19 202.604   2
   2   1 -10 6521.89 200.030   3
  -2  -1  10 6485.68 179.464   4
   2   1  -9 25561.3 610.363   3
   2  -1  -9 28162.8 626.938   2
  -2  -1   9 24895.7 611.179   2
   2   1  -9 26443.9 611.920   2
  -2   1   9 24909.7 597.149   4
   2  -1  -9 25840.3 626.471   3
  -2  -1   9 26727.1 590.294   4
   2  -1  -8 18583.6 427.562   2
  -2   1   8 15587.4 404.267   4
  -2  -1   8 16433.4 414.934   2
   2   1  -8 17777.0 416.874   2
   2  -1  -7 6468.81 194.124   5
  -2   1   7 7064.66 186.242   4
   2   1  -7 6834.41 192.201   2
  -2  -1   7 6915.46 191.883   2
  -2   1   7 5883.89 199.951   2
   2  -1  -7 6355.85 199.899   2
  -2  -1   6 37472.9 840.634   2
   2   1  -6 36054.6 837.003   2
  -2   1   6 37389.1 830.932   4
   2  -1  -6 39684.3 844.383   2
  -2   1   6 36549.0 846.483   2
   2   1  -5 670.967 38.6312   2
  -2   1   5 589.295 40.0921   4
  -2   1   5 691.320 43.6114   2
   2  -1  -5 535.194 43.9689   2
  -2  -1   5 646.369 40.7643   2
   2   1  -4 8307.97 213.750   2
  -2  -1   4 8488.68 214.302   2
  -2   1   4 7863.38 213.386   2
   2  -1  -4 8149.92 213.369   2
   2   1  -4 8267.79 207.181   5
  -2  -1   3 1011.40 47.9163   2
   2  -1  -3 893.574 45.3018   2
  -2   1   3 1000.90 45.6875   2
   2   1  -3 906.225 48.8310   2
   2   1  -2 6664.37 174.973   2
  -2  -1   2 6148.19 173.061   2
   2   1  -2 6191.82 160.723   3
  -2   1   2 6477.82 164.709   2
   2  -1  -2 6802.11 166.384   2
  -2  -1   1 3495.18 113.969   2
   2  -1  -1 3704.91 98.4222   1
   2   1  -1 3375.46 110.599   3
  -2   1   1 3600.37 98.5418   2
   2  -1  -1 3563.93 98.8984   2
  -2   1   1 3867.30 99.6159   1
   2   1  -1 2968.22 110.106   2
  -2  -1   1 3522.20 106.454   3
  -2  -1   0 21852.4 497.085   2
   2  -1   0 21202.2 495.124   1
  -2  -1   0 23237.2 502.283   3
   2  -1   0 22447.7 498.454   3
  -2   1   0 22517.6 486.849   2
   2   1   0 22456.9 498.134   3
  -2   1   0 23906.9 502.909   3
   2  -1   0 22241.3 485.545   2
   2   1   0 22208.8 497.756   2
   2  -1   1 1967.63 76.8425   3
   2  -1   1 2174.52 64.1152   2
   2   1   1 2169.13 72.6078   3
  -2   1  -1 2053.41 62.6299   2
  -2   1  -1 2133.64 80.5727   3
  -2  -1  -1 2232.22 75.2026   3
  -2  -1  -2 14093.0 334.775   3
  -2   1  -2 14363.5 336.231   3
  -2   1  -2 14114.5 313.188   2
   2  -1   2 14289.8 330.468   3
   2   1   2 13526.9 331.163   3
   2   1   3 52858.2 1121.02   3
  -2   1  -3 50707.8 1118.83   3
   2  -1   3 51315.5 1114.91   3
  -2  -1  -3 51812.9 1124.28   3
   2  -1   4 195.696 20.0485   3
   2   1   4 243.705 26.4727   3
  -2   1  -4 193.880 22.3490   3
  -2  -1  -4 243.054 29.4641   3
   2  -1   5 9922.94 258.004   3
  -2  -1  -5 10128.7 269.094   3
   2   1   5 10078.6 264.432   3
  -2   1  -5 10540.8 264.363   3
   2  -1   6 5771.23 169.273   3
   2   1   6 5952.91 178.543   3
  -2  -1  -6 5785.46 181.296   3
  -2   1  -6 5929.54 175.902   3
   2  -1   7 251.061 29.5593   3
   2   1   7 262.842 31.4782   3
  -2   1  -7 249.876 27.6943   3
  -2  -1  -7 257.777 32.3516   3
  -2   1  -8 2233.05 98.2696   3
  -2  -1  -8 2049.55 100.943   3
  -2   1  -8 1961.94 77.0596   2
  -2   1  -8 2182.09 68.3168   4
   2  -1   8 2183.49 93.2568   3
  -2   1  -9 10357.3 249.375   4
  -2   1  -9 11178.9 272.856   2
  -2  -1  -9 10558.2 310.003   3
   2  -1   9 10136.3 289.816   3
  -2   1  -9 10393.7 298.404   3
  -2   1 -10 13248.7 313.997   4
  -2  -1 -10 13327.6 340.632   4
  -2   1 -10 13204.1 368.560   3
  -2  -1 -10 12421.7 376.499   3
  -2   1 -10 14589.5 341.703   2
  -2   1 -11 5629.45 154.769   4
  -2   1 -11 5845.32 208.543   3
  -2  -1 -11 5402.56 213.334   3
  -2  -1 -11 5730.94 177.934   4
  -2   1 -11 6154.17 179.922   2
  -2  -1 -12 20407.5 573.968   3
  -2   1 -12 22776.2 523.751   2
  -2   1 -12 20834.1 560.509   3
  -2  -1 -12 21134.0 516.719   4
  -2  -1 -13 24762.7 656.885   3
  -2  -1 -13 25618.9 593.406   4
  -2   1 -13 23602.6 590.417   2
  -2   1 -13 24658.8 642.019   3
  -2   1 -14 30251.7 771.232   3
  -2  -1 -14 30466.9 710.473   4
  -2  -1 -14 29123.7 783.241   3
  -2   1 -15 25937.7 691.561   3
  -2  -1 -15 25938.4 623.138   4
  -2  -1 -15 24796.9 702.345   3
  -2  -1 -16 14339.0 468.310   3
  -2   1 -16 14385.1 454.169   3
  -2  -1 -17 4610.23 236.555   3
  -2   1 -17 4924.64 233.165   3
  -2  -1 -18 2658.91 179.188   3
  -2   1 -18 2586.58 166.245   3
  -2   1 -19 1506.18 130.893   3
  -2  -1 -19 1403.07 136.984   3
  -2   1 -20 518.563 68.5827   3
  -2  -1 -20 470.793 76.6904   3
  -2  -1 -21-2.17694 48.8523   3
  -2   1 -21 37.9563 28.7270   3
  -2  -1 -22 227.365 73.1089   3
  -2   1 -22 273.310 61.4534   3
  -2   1 -23 372.421 64.0540   3
  -2  -1 -23 347.265 66.0316   3
  -2  -1 -24 2723.65 217.800   3
   2  -2 -25 6428.12 340.964   3
   2  -2 -24 402.755 69.8512   3
   2  -2 -23 4556.62 270.461   3
   2   2 -22 83.1791 23.2191   3
   2  -2 -22 117.707 48.7989   3
   2  -2 -21 1148.04 121.322   3
   2   2 -21 1266.71 110.127   3
   2  -2 -20 19.3184 38.4752   3
   2   2 -20 19.2557 23.4540   3
   2   2 -19 1719.79 121.437   3
   2  -2 -19 1662.77 137.704   3
   2  -2 -18 1963.84 146.017   3
   2   2 -18 2516.50 142.274   3
   2  -2 -17 7957.62 313.997   3
   2   2 -17 8164.98 283.828   3
   2   2 -16 136.758 34.9613   3
   2  -2 -16 108.019 35.0659   3
   2   2 -15 19243.1 506.133   3
   2  -2 -15 18337.8 538.308   3
   2   2 -14 362.464 44.3433   3
   2  -2 -14 319.257 51.6883   3
  -2  -2  13 27212.9 615.034   4
   2   2 -13 26986.4 657.595   3
   2  -2 -13 26674.8 697.104   3
   2   2 -12 4247.02 157.226   3
  -2  -2  12 4378.30 131.714   4
   2  -2 -12 4402.60 185.425   3
  -2  -2  12 4043.54 154.623   2
  -2  -2  11 7074.12 192.718   4
   2  -2 -11 7165.23 246.632   3
  -2  -2  11 6886.06 221.284   2
   2   2 -11 7143.70 217.388   3
   2   2 -11 7769.73 230.625   2
  -2   2  10 24.3460 19.7403   4
   2   2 -10 19.4281 14.6609   2
  -2  -2  10 24.4202 12.9216   4
  -2  -2  10 27.6004 12.3734   2
   2  -2 -10 28.3719 21.8562   3
   2   2 -10 20.3985 15.6846   3
   2   2  -9 129.820 21.3664   2
   2   2  -9 99.6806 21.4725   3
   2  -2  -9 84.7064 22.7222   3
  -2   2   9 39.6582 21.5242   4
  -2  -2   9 107.562 22.7288   2
  -2  -2   8 1862.76 84.5446   5
   2   2  -8 1938.79 83.1554   2
   2  -2  -8 1874.02 87.6291   5
   2   2  -8 1912.43 77.9198   3
  -2   2   8 1386.32 75.8764   4
   2  -2  -8 2070.40 93.8591   2
  -2  -2   8 1690.65 80.2628   2
   2  -2  -7 32276.8 784.067   2
  -2  -2   7 34439.8 772.572   2
   2   2  -7 35978.1 776.108   2
  -2  -2   7 36652.7 773.404   5
  -2   2   7 31747.8 769.347   4
  -2  -2   6 755.688 43.0579   5
   2   2  -6 819.867 48.7108   2
   2  -2  -6 529.012 47.8233   2
  -2  -2   6 759.208 45.8398   2
  -2   2   6 591.051 42.9407   4
   2   2  -5 5559.70 161.138   2
  -2  -2   5 5995.15 162.197   2
  -2  -2   5 5201.99 149.204   5
   2  -2  -5 5662.41 164.441   2
  -2   2   5 4518.96 154.246   4
  -2   2   4 7238.97 202.813   2
   2   2  -4 7419.18 210.031   2
   2  -2  -4 7329.49 204.860   2
  -2   2   4 7664.24 199.924   4
  -2  -2   4 7526.59 190.988   5
  -2  -2   4 8354.14 208.659   2
  -2  -2   3 36262.6 818.944   2
  -2   2   3 41265.9 811.875   2
   2  -2  -3 39731.5 812.429   2
   2   2  -3 34049.4 789.135   3
  -2   2   3 38252.1 806.618   4
   2   2  -3 36754.8 819.935   2
   2   2  -2 54.6728 15.5435   2
   2  -2  -2 47.4293 15.8864   2
   2   2  -2 77.7276 13.1110   3
  -2  -2   2 15.1578 15.0679   3
  -2   2   2 88.7546 18.8600   4
  -2   2   2 107.830 17.6995   2
  -2  -2   2 110.098 22.1665   2
  -2  -2   1 90370.1 1981.74   2
  -2   2   1 97918.0 1980.49   1
  -2  -2   1 91742.3 1974.90   3
  -2   2   1 96838.1 1969.54   2
   2  -2  -1 93930.7 1968.00   2
   2   2  -1 94451.6 1970.72   3
  -2   2   0 556.888 35.4804   1
   2  -2   0 475.626 31.1675   3
   2  -2   0 400.271 32.6870   1
   2   2   0 454.499 29.4603   3
   2  -2   0 401.901 25.0580   2
  -2   2   0 501.073 24.1321   2
  -2  -2   0 497.091 33.3844   2
  -2  -2   0 464.869 28.6901   3
  -2   2  -1 66402.2 1346.57   3
   2  -2   1 65699.5 1345.98   3
   2  -2   1 63342.7 1350.73   1
  -2   2  -1 59163.2 1321.14   2
  -2  -2  -1 64615.1 1346.87   3
   2   2   1 62053.0 1341.85   3
   2  -2   1 62839.0 1321.46   2
  -2   2  -2 4046.19 125.459   3
  -2  -2  -2 4079.60 123.755   3
   2  -2   2 3958.62 121.444   3
   2   2   2 4055.89 120.296   3
   2  -2   3 4951.33 133.842   3
   2   2   3 4616.80 139.585   3
  -2  -2  -3 4677.42 142.432   3
  -2   2  -3 4588.99 142.287   3
   2  -2   4 1191.06 54.2976   3
  -2   2  -4 1320.25 60.1820   3
  -2  -2  -4 1303.89 66.1675   3
   2   2   4 1396.25 64.7892   3
  -2  -2  -5 12837.7 226.779   3
   2  -2   5 13009.7 195.773   3
   2   2   5 12467.8 216.610   3
  -2   2  -5 12978.9 204.552   3
  -2  -2  -6 16500.4 399.583   3
   2   2   6 17523.3 396.081   3
   2  -2   6 16769.2 373.441   3
  -2   2  -6 16931.1 382.662   3
  -2   2  -7 22572.7 521.077   3
  -2  -2  -7 22980.2 542.361   3
   2  -2   7 23127.7 511.685   3
  -2   2  -7 20502.3 481.374   2
  -2  -2  -8 4649.10 174.026   3
  -2   2  -8 4476.94 127.479   2
   2  -2   8 4843.25 151.991   3
  -2   2  -8 4742.80 158.907   3
  -2   2  -9 12833.3 308.839   2
   2  -2   9 13197.5 339.656   3
  -2  -2  -9 12821.3 369.202   3
  -2   2  -9 13108.7 349.043   3
  -2  -2 -10 967.946 77.8190   3
  -2   2 -10 931.035 66.9884   3
  -2   2 -10 954.430 49.0425   2
  -2  -2 -11 18533.9 522.246   3
  -2  -2 -11 18946.4 480.008   4
  -2   2 -11 19558.7 455.516   2
  -2   2 -11 19226.8 499.397   3
  -2   2 -12 640.677 43.7476   2
  -2  -2 -12 550.701 48.7731   4
  -2  -2 -12 599.389 71.2034   3
  -2   2 -12 557.456 60.2697   3
  -2  -2 -13 956.492 67.7871   4
  -2  -2 -13 997.809 93.4765   3
  -2   2 -13 914.389 78.0887   3
  -2   2 -13 925.040 57.4127   2
  -2   2 -14 80.3817 19.8008   2
  -2  -2 -14 85.7408 23.3740   4
  -2  -2 -14 64.4730 28.4804   3
  -2   2 -14 113.091 33.3922   3
  -2  -2 -15 686.369 84.0240   3
  -2   2 -15 731.869 77.7269   3
  -2  -2 -15 729.169 62.8239   4
  -2  -2 -16 278.202 57.3042   3
  -2  -2 -16 270.925 43.8554   4
  -2   2 -16 260.973 53.1107   3
  -2   2 -17 9964.34 352.807   3
  -2  -2 -17 8958.77 364.106   3
  -2   2 -18 1400.58 120.823   3
  -2  -2 -18 1366.58 125.175   3
  -2  -2 -19 10509.8 414.543   3
  -2   2 -19 10443.9 387.000   3
  -2   2 -20 1764.99 151.613   3
  -2  -2 -20 1510.90 143.355   3
  -2   2 -21 9408.57 375.109   3
  -2  -2 -21 7955.00 383.264   3
  -2  -2 -22 1375.90 150.251   3
  -2   2 -22 1604.82 153.528   3
  -2  -2 -23 3166.77 232.484   3
  -2  -2 -24 428.966 69.4326   3
   2  -3 -25-26.4536 66.5555   3
   2  -3 -24 949.560 126.780   3
   2  -3 -23 4474.63 270.924   3
   2  -3 -22 6082.17 315.549   3
   2   3 -21 5095.43 236.277   3
   2  -3 -21 4650.07 263.594   3
   2  -3 -20 13227.8 496.320   3
   2   3 -20 15405.7 462.262   3
   2  -3 -19 4351.23 241.849   3
   2   3 -19 5018.54 217.740   3
   2  -3 -18 6407.22 291.422   3
   2   3 -18 7304.41 263.628   3
   2   3 -17 5644.86 215.150   3
   2  -3 -17 4968.40 244.914   3
   2  -3 -16 651.199 68.5237   3
   2   3 -16 550.263 58.8973   3
   2  -3 -15 602.295 71.9130   3
   2   3 -15 570.656 56.5538   3
   2   3 -14 149.929 36.2239   3
   2  -3 -14 139.481 28.9181   3
  -2  -3  13 1182.42 76.0057   2
  -2  -3  13 1164.70 53.7018   4
   2  -3 -13 1115.12 91.7468   3
   2   3 -13 1174.80 73.3962   3
   2   3 -12 2547.47 119.209   2
  -2  -3  12 2535.06 85.9473   4
   2  -3 -12 2399.21 131.810   3
   2   3 -12 2226.07 101.581   3
  -2  -3  12 2384.76 109.636   2
  -2  -3  11 6375.96 166.760   4
   2   3 -11 5820.56 183.919   3
  -2  -3  11 5896.30 191.329   2
   2  -3 -11 5634.15 219.870   3
   2   3 -11 6049.26 202.803   2
   2   3 -10 18670.6 449.346   3
   2   3 -10 20164.5 479.211   2
   2  -3 -10 18807.5 499.843   3
  -2  -3  10 17923.2 460.436   2
   2  -3  -9 6380.73 210.589   5
  -2  -3   9 6755.67 201.511   2
   2   3  -9 6837.11 187.794   3
   2  -3  -9 6597.24 223.730   3
   2  -3  -9 6311.78 208.556   4
   2   3  -9 7431.77 214.670   2
  -2   3   8 44055.4 983.363   4
   2   3  -8 42999.4 959.176   3
   2  -3  -8 44463.4 1011.94   3
   2  -3  -8 41460.8 989.876   4
  -2  -3   8 42547.2 979.318   2
   2   3  -8 46433.9 995.174   2
   2  -3  -7 16758.5 416.675   2
  -2   3   7 15806.0 397.100   4
   2  -3  -7 15125.4 402.524   4
   2   3  -7 16998.5 411.303   2
  -2  -3   7 16744.5 398.232   2
  -2   3   6 16394.7 408.022   4
  -2  -3   6 17400.9 414.945   2
   2  -3  -6 18382.6 426.468   2
   2  -3  -6 15769.7 408.146   4
   2   3  -6 17153.9 424.025   2
   2  -3  -5 9041.19 232.415   2
  -2  -3   5 8408.04 222.872   2
  -2   3   5 6915.71 211.441   4
   2  -3  -5 7892.49 215.357   4
   2   3  -5 7652.81 225.026   2
   2   3  -4 2860.26 106.098   2
   2   3  -4 2890.75 83.6019   3
   2  -3  -4 2986.02 106.469   2
  -2  -3   4 3231.97 114.729   2
   2  -3  -4 2887.28 100.828   4
  -2   3   4 2905.72 102.170   4
  -2   3   3 1107.26 58.0294   4
   2  -3  -3 1203.69 58.0088   2
  -2  -3   3 1220.28 42.9054   3
   2   3  -3 1332.90 62.7897   2
   2  -3  -3 1131.16 55.2234   4
   2   3  -3 1138.90 46.2114   3
  -2  -3   3 1300.77 64.3554   2
   2   3  -2 14180.6 288.120   1
  -2  -3   2 13153.0 322.484   2
  -2  -3   2 13362.6 292.880   5
   2   3  -2 12681.1 320.495   2
  -2   3   2 12681.3 312.652   4
  -2  -3   2 13041.6 307.419   3
   2  -3  -2 12671.0 310.542   4
   2  -3  -2 14026.9 313.174   2
   2   3  -2 12091.7 296.359   3
  -2   3   1 108.579 24.0166   1
  -2  -3   1 81.3562 15.6863   3
   2  -3  -1 87.0967 16.9456   4
   2  -3  -1 107.535 17.1767   2
  -2  -3   1 60.2284 15.1051   2
   2   3  -1 46.6588 12.4431   3
  -2   3   1 49.3808 12.6022   4
  -2   3   0 162.689 19.8798   1
   2  -3   0 151.754 16.3721   2
   2  -3   0 177.048 24.2255   1
  -2  -3   0 155.912 16.7956   3
   2   3   0 212.373 19.7455   3
  -2   3   0 205.100 20.1711   4
   2   3   1 29636.8 661.528   3
  -2  -3  -1 29498.9 665.548   3
   2  -3   1 30869.1 642.251   2
   2  -3   1 30385.4 657.723   3
  -2   3  -1 30412.7 651.543   4
   2  -3   1 29816.7 671.765   1
   2  -3   2 7157.92 203.587   1
   2   3   2 7470.45 195.651   3
   2  -3   2 7307.43 195.574   3
  -2   3  -2 7633.18 178.627   4
   2  -3   2 7224.44 166.350   2
  -2   3  -2 7645.18 191.905   3
  -2  -3  -2 7133.15 198.696   3
  -2  -3  -3 4219.76 133.116   3
   2   3   3 4013.94 129.080   3
   2   3   3 3788.23 97.6776   5
  -2   3  -3 4125.31 103.301   4
   2  -3   3 4308.57 121.674   3
  -2   3  -3 4083.45 125.821   3
   2  -3   4 31734.2 694.180   3
   2   3   4 27784.0 675.489   5
   2   3   4 31936.4 716.059   3
  -2   3  -4 32412.0 670.324   4
  -2   3  -4 32014.2 712.532   3
  -2  -3  -4 31357.5 721.306   3
   2   3   5 2066.32 69.5379   5
  -2  -3  -5 2300.82 98.6827   3
   2  -3   5 2239.03 79.6922   3
   2   3   5 2481.55 97.3833   3
  -2   3  -5 2401.43 89.1075   3
  -2  -3  -6 7305.66 223.019   3
  -2   3  -6 7685.25 202.456   3
   2   3   6 6549.96 182.256   5
   2  -3   6 7194.13 191.463   3
   2   3   6 7672.80 220.701   3
  -2   3  -7 238.634 16.0184   2
  -2  -3  -7 305.635 42.4093   3
   2  -3   7 318.997 27.2420   3
  -2   3  -7 315.780 31.5762   3
   2   3   7 283.213 25.4622   5
  -2  -3  -8 443.453 52.5781   3
   2  -3   8 403.093 36.3435   3
  -2   3  -8 355.628 22.3430   2
   2   3   8 326.483 30.4195   5
  -2   3  -8 393.347 38.7952   3
   2   3   9 7196.55 208.148   5
  -2  -3  -9 7549.39 253.518   3
   2  -3   9 7754.87 215.999   3
  -2   3  -9 7287.94 185.377   2
  -2   3  -9 7585.82 223.652   3
  -2   3 -10 6559.62 173.506   2
  -2  -3 -10 6717.26 242.636   3
   2  -3  10 6920.96 203.771   3
  -2   3 -10 6248.22 209.236   3
  -2   3 -11 9415.00 236.216   2
  -2  -3 -11 8806.55 308.442   3
  -2  -3 -11 9133.30 278.885   4
  -2   3 -11 9020.33 276.428   3
  -2   3 -12 14821.0 419.173   3
  -2  -3 -12 15097.6 461.063   3
  -2  -3 -12 15364.3 418.295   4
  -2   3 -12 15875.9 374.851   2
  -2   3 -13 13359.5 341.007   2
  -2   3 -13 13610.3 389.729   3
  -2  -3 -13 13436.0 381.619   4
  -2  -3 -13 13515.3 431.889   3
  -2  -3 -14 11552.2 341.103   4
  -2  -3 -14 11358.7 395.727   3
  -2   3 -14 11506.7 355.080   3
  -2  -3 -15 14771.3 415.168   4
  -2  -3 -15 14358.0 476.459   3
  -2   3 -15 14282.3 431.278   3
  -2   3 -16 14251.0 430.584   3
  -2  -3 -16 13356.7 398.141   4
  -2  -3 -16 13867.6 473.486   3
  -2  -3 -17 5585.95 214.451   4
  -2  -3 -17 4996.12 262.627   3
  -2   3 -17 5218.58 233.354   3
  -2   3 -18 3523.68 191.398   3
  -2  -3 -18 3069.09 200.978   3
  -2  -3 -19 1657.06 154.024   3
  -2   3 -19 1595.03 132.823   3
  -2   3 -20 135.158 53.9884   3
  -2  -3 -20 11.9568 33.5174   3
  -2  -3 -21 112.580 52.4917   3
  -2  -3 -22 1993.16 177.088   3
  -2  -3 -23 749.700 115.858   3
   2  -4 -24 3639.15 261.590   3
   2  -4 -23 1338.70 147.219   3
   2  -4 -22 643.848 88.8606   3
   2  -4 -21 102.303 26.6898   3
   2   4 -20 43.5426 18.5933   3
   2  -4 -20-24.7288 49.5732   3
   2  -4 -19 1010.67 110.707   3
   2   4 -19 1162.19 88.1243   3
   2  -4 -18 3242.61 199.085   3
   2   4 -18 3401.21 161.797   3
   2  -4 -17 3568.00 206.872   3
   2   4 -17 3738.57 164.382   3
   2  -4 -16 21226.5 635.514   3
   2   4 -16 22223.3 563.946   3
   2  -4 -15 811.128 92.0913   3
   2   4 -15 842.992 67.5997   3
   2   4 -14 32362.0 756.855   3
   2  -4 -14 31827.9 836.655   3
  -2  -4  14 34387.3 769.593   2
  -2  -4  14 31338.1 704.779   4
  -2  -4  13 11669.4 274.001   4
   2   4 -13 11168.8 307.493   3
   2  -4 -13 10972.4 368.762   3
  -2  -4  13 11047.6 316.052   2
   2  -4 -12 7152.29 269.894   3
  -2  -4  12 7906.82 195.669   4
  -2  -4  12 7413.84 229.256   2
   2   4 -12 7414.01 243.520   2
   2   4 -12 7294.10 214.802   3
   2   4 -11 12894.0 330.238   3
  -2  -4  11 13179.2 347.983   2
   2  -4 -11 12974.7 395.139   3
   2   4 -11 14023.9 372.229   2
   2  -4 -11 13276.6 374.408   4
   2   4 -10 2804.58 96.6385   3
  -2  -4  10 2822.19 113.207   2
   2  -4 -10 2746.21 137.211   3
   2  -4 -10 2772.40 125.713   5
   2   4 -10 2928.69 125.585   2
   2  -4 -10 2820.18 126.546   4
   2   4  -9 239.379 23.7787   3
   2  -4  -9 210.777 38.0754   3
   2   4  -9 250.221 33.6713   2
  -2  -4   9 193.055 29.0208   2
   2  -4  -9 198.993 32.1307   4
  -2  -4   8 4294.05 142.702   2
   2  -4  -8 4229.33 165.321   3
   2  -4  -8 4028.24 149.103   4
   2   4  -8 4047.00 153.319   2
   2   4  -8 4180.66 117.330   3
   2   4  -7 243.262 30.1092   2
   2   4  -7 237.973 18.6086   3
   2  -4  -7 225.625 34.5255   4
  -2  -4   7 218.291 26.1825   2
  -2  -4   6 30608.4 671.095   2
  -2   4   6 28399.3 663.923   4
   2   4  -6 30153.2 671.473   2
   2  -4  -6 31675.1 684.496   2
   2  -4  -6 27734.2 665.857   4
  -2   4   5 4.97517 14.9825   4
   2   4  -5 23.8543 7.76872   3
   2   4  -5 17.7621 13.7364   2
  -2  -4   5 9.50159 12.4780   2
  -2  -4   5 4.77052 8.66983   1
   2  -4  -5 27.0921 23.9977   2
   2  -4  -5 24.2381 21.2266   4
  -2  -4   4 50096.5 1223.45   2
  -2   4   4 52233.2 1205.08   4
  -2  -4   4 54059.6 1178.27   1
   2  -4  -4 57761.1 1217.44   2
   2   4  -4 54977.6 1209.77   2
   2  -4  -4 50112.7 1204.43   4
   2   4  -4 49582.8 1168.67   3
  -2   4   3 12.5726 17.2358   4
  -2  -4   3 39.0773 19.8709   2
   2  -4  -3 72.4603 20.8255   4
   2  -4  -3 65.2653 19.6629   2
  -2  -4   3 47.2299 13.2822   3
   2   4  -3 58.3257 10.2472   3
  -2  -4   2 50287.6 1026.46   3
  -2  -4   2 49097.5 1053.82   2
   2   4  -2 49002.9 1019.83   1
  -2   4   2 47399.6 1040.85   4
   2  -4  -2 46669.2 1038.86   4
   2   4  -2 44424.5 1014.61   3
   2   4  -1 2257.77 73.3241   3
  -2   4   1 2248.21 83.4994   4
   2  -4  -1 2017.40 79.9931   4
  -2  -4   1 2406.16 77.8760   3
  -2  -4   1 2287.91 90.9813   2
  -2   4   1 2407.72 96.1984   1
  -2   4   0 27610.1 611.192   1
  -2  -4   0 25583.3 590.402   3
  -2   4   0 26586.6 590.156   4
   2  -4   0 25223.5 586.619   4
   2   4   0 26019.7 584.514   3
   2   4   1 70.4839 14.9696   3
   2  -4   1 63.7398 19.5807   4
   2  -4   1 64.5861 13.3803   3
   2  -4   1 34.4342 19.9314   1
  -2   4  -1 53.6722 20.1106   1
  -2  -4  -1 57.4410 17.6870   3
  -2   4  -1 48.4995 12.6478   4
   2   4   2 701.889 45.4903   3
  -2  -4  -2 765.223 47.4648   3
   2  -4   2 693.208 28.3573   2
   2  -4   2 740.657 52.6911   1
  -2   4  -2 789.561 37.2567   4
   2  -4   2 803.318 41.6418   3
   2   4   3 10839.3 220.187   3
   2  -4   3 10474.6 230.861   1
   2  -4   3 10137.3 201.659   3
  -2  -4  -3 10126.2 224.593   3
   2   4   4 12589.1 311.903   3
  -2   4  -4 12086.2 292.436   3
   2  -4   4 11548.0 283.567   3
  -2  -4  -4 11372.2 313.161   3
   2  -4   5 25400.1 586.996   3
  -2   4  -5 26707.9 607.805   3
   2   4   5 28038.2 626.940   3
  -2  -4  -5 26364.1 630.287   3
  -2   4  -6 42605.2 930.822   3
   2  -4   6 41986.9 911.243   3
  -2  -4  -6 41036.8 960.641   3
  -2  -4  -7 12790.4 362.596   3
   2  -4   7 12707.7 311.393   3
  -2   4  -7 12998.1 326.521   3
  -2  -4  -8 65226.1 1472.81   3
  -2   4  -8 66164.7 1422.68   3
   2  -4   8 64845.6 1407.08   3
  -2  -4  -9 8466.21 282.193   3
   2  -4   9 8482.92 229.151   3
  -2   4  -9 8107.76 237.287   3
  -2  -4 -10 27190.3 694.302   3
   2  -4  10 27195.5 624.020   3
  -2   4 -10 26374.0 584.983   2
  -2   4 -10 26620.7 634.745   3
  -2  -4 -11 6701.65 257.051   3
  -2  -4 -11 6562.94 229.081   4
   2  -4  11 6540.91 199.127   3
  -2   4 -11 6324.17 208.152   3
  -2   4 -11 6421.65 169.015   2
  -2  -4 -12 12782.6 408.828   3
  -2   4 -12 12270.2 350.615   3
  -2  -4 -12 12891.3 374.130   4
  -2   4 -13 2962.11 138.550   3
  -2  -4 -13 3262.32 152.533   4
  -2  -4 -13 3446.61 183.835   3
  -2  -4 -14 18.5796 27.2399   4
  -2  -4 -14 25.8146 24.6510   3
  -2   4 -14 13.6220 20.7328   3
  -2  -4 -15 772.187 75.4583   4
  -2  -4 -15 782.309 98.0352   3
  -2   4 -15 732.739 68.8599   3
  -2  -4 -16 3235.41 160.987   4
  -2  -4 -16 2855.81 188.140   3
  -2   4 -16 2918.61 153.623   3
  -2  -4 -17 1251.88 126.581   3
  -2  -4 -17 1484.82 106.249   4
  -2   4 -17 1296.00 104.167   3
  -2  -4 -18 11900.8 382.150   4
  -2  -4 -18 11714.6 453.459   3
  -2   4 -18 11417.6 384.567   3
  -2  -4 -19 2744.18 204.210   3
  -2   4 -19 2885.54 168.699   3
  -2  -4 -20 12705.1 503.364   3
  -2  -4 -21 1796.11 175.010   3
  -2  -4 -22 7065.01 378.725   3
  -2  -4 -23 1898.57 200.975   3
   2  -5 -24 517.770 131.006   3
   2  -5 -23 4892.77 300.878   3
   2  -5 -22 3802.61 256.301   3
   2  -5 -21 6823.69 341.970   3
   2  -5 -20 1246.11 135.326   3
   2  -5 -19 5888.32 296.109   3
   2   5 -18 3179.95 146.062   3
   2  -5 -18 2713.03 187.256   3
   2  -5 -17 1968.30 152.536   3
   2   5 -17 2400.87 117.467   3
   2  -5 -16 2656.45 173.636   3
   2   5 -16 2831.70 124.515   3
   2   5 -15-2.65097 13.7916   3
   2  -5 -15 10.2234 23.3454   3
  -2  -5  15 22.0037 23.3150   2
   2   5 -14 2947.41 114.235   3
   2  -5 -14 2479.31 155.752   3
  -2  -5  14 2591.47 78.8144   4
  -2  -5  14 2849.04 123.628   2
   2   5 -13 3062.83 112.781   3
   2  -5 -13 2774.26 146.363   4
   2  -5 -13 2784.58 156.889   3
  -2  -5  13 2954.24 89.5358   4
  -2  -5  13 2966.56 124.482   2
   2   5 -12 6.55552 14.4317   3
   2  -5 -12 41.4246 33.7748   4
  -2  -5  12 20.4069 22.0357   2
   2  -5 -12 12.0265 20.6070   3
   2   5 -12 8.05124 21.7198   2
   2  -5 -11 14229.4 395.731   5
   2   5 -11 14335.6 341.707   3
   2  -5 -11 14054.6 402.302   4
   2   5 -11 14463.7 394.568   2
  -2  -5  11 14016.6 369.750   2
   2  -5 -11 13985.2 424.577   3
   2  -5 -10-12.5941 16.3039   3
   2   5 -10 45.2262 15.9819   2
   2  -5 -10 8.39286 14.3650   4
   2  -5 -10 35.0716 25.1686   5
   2   5 -10 44.6492 10.6740   3
  -2  -5  10 47.1333 21.6773   2
   2  -5  -9 41735.9 1003.54   3
   2  -5  -9 40100.7 984.398   4
   2   5  -9 42756.9 914.611   3
   2   5  -9 45497.2 979.168   2
  -2  -5   9 42220.4 957.139   2
   2   5  -8 382.319 26.3007   3
  -2  -5   8 790.187 56.8658   2
   2  -5  -8 942.352 65.9931   4
   2   5  -8 918.543 33.1672   3
   2   5  -8 1096.01 63.9585   2
   2  -5  -8 896.774 68.4910   3
  -2  -5   7 29252.4 393.802   2
   2  -5  -7 27983.2 428.567   3
   2  -5  -7 26890.2 403.863   4
  -2  -5   6 809.697 44.1993   1
   2   5  -6 890.880 56.6827   2
  -2  -5   6 859.018 61.6917   2
   2  -5  -6 789.912 56.3526   4
  -2  -5   5 2095.25 76.2722   1
   2   5  -5 2392.02 94.7029   2
   2  -5  -5 1952.82 94.4907   4
  -2  -5   5 2211.96 105.149   2
   2   5  -4 72.7397 8.15902   3
   2  -5  -4 131.116 25.9488   4
  -2  -5   4 133.010 29.2517   2
  -2  -5   3 85.9846 13.3329   3
   2   5  -3 50.9424 8.96685   3
   2   5  -3 53.5968 12.5826   1
   2  -5  -3 44.4340 16.9234   4
  -2  -5   3 119.660 21.0378   2
   2   5  -2 2332.89 74.6614   3
  -2  -5   2 2591.75 104.199   2
   2  -5  -2 2424.33 95.9785   4
  -2  -5   2 2627.53 82.0209   3
   2   5  -2 2624.80 87.0835   1
   2   5  -1 27571.4 622.750   3
  -2  -5   1 30242.5 632.830   3
  -2   5   1 31677.1 671.529   1
   2  -5  -1 26866.1 641.455   4
  -2  -5   0 53.1615 10.0680   3
   2   5   0 40.5198 10.0319   3
   2  -5   0 24.9107 10.5129   4
  -2   5   0 25.1983 12.6663   1
   2  -5   1 72880.8 1601.15   4
   2  -5   1 75791.4 1629.90   1
  -2   5  -1 76320.8 1633.82   1
   2   5   1 75979.6 1605.62   3
  -2  -5  -1 73600.6 1612.73   3
  -2  -5  -2 3039.09 112.191   3
   2  -5   2 2839.77 96.0312   4
   2  -5   2 2955.32 118.644   1
   2   5   2 3254.82 109.218   3
   2  -5   2 2987.98 96.2238   3
   2   5   3 41135.7 879.253   3
  -2  -5  -3 37980.1 882.838   3
   2  -5   3 39318.0 889.546   1
   2  -5   3 38062.6 860.378   3
   2  -5   3 38115.9 849.900   4
   2   5   4 2368.30 91.5861   3
   2  -5   4 2194.98 69.2372   3
   2  -5   4 1788.42 50.3974   2
   2  -5   4 1892.29 94.2189   1
  -2  -5  -4 2238.64 96.7213   3
  -2   5  -5 24593.2 538.832   3
   2  -5   5 23123.4 528.253   3
  -2  -5  -5 23294.4 581.030   3
  -2  -5  -6 34.0811 23.9399   3
   2  -5   6 29.8661 7.36908   3
  -2   5  -6 29.0680 13.5448   3
   2  -5   7 11989.0 289.782   3
  -2   5  -7 12173.8 311.645   3
  -2  -5  -7 11717.8 349.315   3
  -2   5  -8 103.611 20.2550   3
  -2  -5  -8 131.055 38.2553   3
   2  -5   8 159.848 20.8844   3
  -2  -5  -9 1392.44 100.140   3
   2  -5   9 1484.05 65.7965   3
  -2   5  -9 1372.23 72.5056   3
   2  -5  10 4802.38 149.722   3
  -2   5 -10 4647.49 159.870   3
  -2  -5 -10 4490.27 200.997   3
  -2   5 -11 5193.41 182.293   3
  -2  -5 -11 5942.18 221.463   4
  -2  -5 -11 5521.93 233.891   3
   2  -5  11 5532.21 171.155   3
  -2  -5 -12 566.860 70.8275   3
  -2  -5 -12 639.470 65.7078   4
   2  -5  12 650.242 49.4217   3
  -2   5 -12 569.505 51.0186   3
  -2  -5 -13 15259.3 447.737   4
  -2  -5 -13 15757.9 490.780   3
  -2   5 -13 15006.7 411.766   3
  -2   5 -14 3322.72 146.011   3
  -2  -5 -14 3323.19 196.627   3
  -2  -5 -14 3134.49 161.083   4
  -2   5 -15 11311.5 345.967   3
  -2  -5 -15 11406.8 372.467   4
  -2  -5 -15 11785.8 426.853   3
  -2  -5 -16 4846.14 217.203   4
  -2  -5 -16 4753.62 259.877   3
  -2   5 -16 4759.34 197.027   3
  -2   5 -17 3838.20 178.437   3
  -2  -5 -17 3900.76 191.006   4
  -2  -5 -17 3640.16 229.597   3
  -2  -5 -18 1500.16 112.980   4
  -2  -5 -18 1494.06 144.406   3
  -2  -5 -19 323.324 79.9776   3
  -2  -5 -19 214.557 44.2551   4
  -2  -5 -20 41.5825 40.0672   3
  -2  -5 -21 232.734 76.6462   3
  -2  -5 -22 102.617 54.7239   3
   2  -6 -23 1540.08 168.318   3
   2  -6 -22 763.906 113.576   3
   2  -6 -21 115.149 32.9740   3
   2  -6 -20 99.4890 55.7679   3
   2  -6 -19 963.423 109.052   3
   2  -6 -18 2340.26 177.830   3
   2  -6 -17 6014.37 290.183   3
   2   6 -16 14194.0 369.416   3
   2  -6 -16 13749.7 475.820   3
   2   6 -15 18408.3 440.933   3
  -2  -6  15 17410.6 460.683   2
   2  -6 -15 17013.5 547.187   3
   2  -6 -14 11391.3 378.716   4
  -2  -6  14 11799.7 329.032   2
   2  -6 -14 11226.6 401.591   3
   2   6 -14 12044.4 302.806   3
   2  -6 -13 21255.6 627.600   3
  -2  -6  13 23644.1 503.406   4
   2   6 -13 22267.1 520.287   3
  -2  -6  13 22187.1 555.357   2
   2  -6 -13 20655.4 603.043   4
   2   6 -12 6558.92 173.822   3
   2   6 -12 6886.52 218.763   2
   2  -6 -12 6604.91 262.041   3
  -2  -6  12 6396.20 205.693   2
   2  -6 -12 6142.88 239.887   4
   2  -6 -11 5455.15 223.607   3
   2   6 -11 5242.99 139.987   3
   2   6 -11 5667.75 185.922   2
   2  -6 -11 5231.08 207.118   4
  -2  -6  11 5209.49 176.506   2
   2  -6 -11 5419.35 198.526   5
   2   6 -10 9216.88 222.221   3
   2  -6 -10 9794.45 307.772   4
   2  -6 -10 9977.23 322.818   3
  -2  -6  10 9685.16 271.278   2
   2   6 -10 11450.5 286.813   2
   2  -6  -9 1114.07 85.5382   3
   2  -6  -9 1015.48 75.6394   4
  -2  -6   9 1127.22 68.7091   2
   2   6  -9 1409.67 74.1570   2
   2  -6  -8 1382.99 89.0611   4
   2   6  -8 1673.68 77.8671   2
  -2  -6   8 1468.47 72.4093   1
  -2  -6   8 1489.29 82.0712   2
   2  -6  -8 1363.25 93.3648   3
  -2  -6   7 312.943 32.8680   1
   2  -6  -7 391.542 45.7501   3
   2  -6  -7 300.643 42.2241   4
  -2  -6   7 337.279 42.6778   2
  -2  -6   6 1154.34 74.5076   2
  -2  -6   6 1290.37 60.4613   1
   2  -6  -6 1172.73 75.6649   4
   2  -6  -6 1202.94 78.9109   3
   2  -6  -5 21098.9 525.504   4
  -2  -6   5 21136.0 536.023   2
  -2  -6   4 350.682 43.4116   2
   2  -6  -4 273.566 38.7018   4
   2   6  -4 166.609 12.7761   3
  -2  -6   3 27133.8 645.221   2
   2   6  -3 26686.7 585.429   3
   2   6  -3 27873.4 617.050   1
   2  -6  -3 26498.7 635.272   4
  -2  -6   3 25736.5 595.536   3
   2   6  -2 1932.67 66.2241   3
   2   6  -2 1995.76 81.5363   1
   2  -6  -2 1855.29 88.9728   4
  -2  -6   2 1974.14 71.0144   3
  -2  -6   2 1929.11 91.8200   2
   2   6  -1 8745.87 220.608   3
   2  -6  -1 8593.13 242.331   4
  -2   6   1 9044.42 265.762   1
  -2  -6   1 8885.03 228.977   3
  -2   6   0 445.850 43.5826   1
   2   6   0 623.360 36.7661   3
  -2  -6   0 520.492 38.2160   3
   2  -6   0 445.505 38.5932   4
   2  -6   1 9010.92 249.249   4
  -2   6  -1 9451.63 277.088   1
  -2  -6  -1 9405.24 256.118   3
   2   6   1 10203.9 252.470   3
  -2  -6  -2 10.3988 9.13274   3
   2  -6   2 27.0989 15.5222   4
   2  -6   2 10.5589 24.1016   1
   2  -6   2 18.6474 8.30745   3
   2   6   2 24.2403 15.5843   3
  -2  -6  -3 6645.82 209.388   3
   2   6   3 7419.71 206.663   3
   2  -6   3 6528.45 182.999   4
   2  -6   3 6717.95 213.526   1
   2  -6   3 6884.84 186.014   3
   2  -6   4 1522.72 59.6722   4
  -2  -6  -4 1470.69 82.1042   3
   2  -6   4 1262.91 59.2872   3
   2  -6   4 1220.95 51.3153   2
   2  -6   5 10777.9 212.998   3
  -2  -6  -5 11057.3 277.684   3
   2  -6   6 7618.40 189.951   3
  -2  -6  -6 7615.24 250.583   3
   2  -6   7 29574.7 668.807   3
  -2  -6  -7 30299.9 751.346   3
  -2   6  -7 31843.6 685.705   3
  -2   6  -8 20714.2 500.247   3
   2  -6   8 21668.0 482.259   3
  -2  -6  -8 21278.4 570.231   3
   2  -6   9 17277.3 397.973   3
  -2  -6  -9 16453.8 482.623   3
  -2   6  -9 16749.6 418.095   3
  -2  -6 -10 4817.86 213.866   3
  -2   6 -10 4918.14 166.181   3
   2  -6  10 5095.83 149.489   3
  -2  -6 -11 19203.7 565.048   3
   2  -6  11 19692.9 469.923   3
  -2  -6 -11 20350.1 550.643   4
  -2   6 -11 19418.7 488.681   3
  -2  -6 -12 891.276 82.1446   4
  -2  -6 -12 1004.20 98.6925   3
  -2   6 -12 925.102 65.7482   3
  -2  -6 -13 118.718 35.8000   4
  -2   6 -13 108.774 29.6382   3
  -2  -6 -13 91.6010 36.3804   3
  -2   6 -14 162.893 34.2248   3
  -2  -6 -14 179.026 46.4546   3
  -2  -6 -14 186.116 35.1286   4
  -2   6 -15 95.6309 30.3682   3
  -2  -6 -15 84.9588 39.3085   3
  -2  -6 -15 33.9969 27.8435   4
  -2   6 -16 3514.56 160.559   3
  -2  -6 -16 3817.84 196.493   4
  -2  -6 -16 3700.46 222.003   3
  -2  -6 -17 7020.47 288.907   4
  -2  -6 -17 6548.98 326.202   3
  -2  -6 -18 3016.42 215.929   3
  -2  -6 -18 2661.03 165.265   4
  -2  -6 -19 13031.8 445.780   4
  -2  -6 -19 13365.4 525.265   3
  -2  -6 -20 3665.28 204.280   4
  -2  -6 -20 3091.41 236.503   3
  -2  -6 -21 8857.15 435.154   3
  -2  -6 -22 4735.82 317.258   3
   2  -7 -22 3741.87 265.029   3
   2  -7 -21 144.478 62.1485   3
   2  -7 -20 5971.12 324.698   3
   2  -7 -19 244.546 66.8788   3
   2  -7 -18 6016.53 301.271   3
   2  -7 -17 175.660 60.1711   3
   2  -7 -16 231.316 46.7760   3
  -2  -7  16 297.604 39.2287   2
   2  -7 -15 41.1767 34.6996   3
  -2  -7  15 37.8072 17.8159   2
   2  -7 -15 7.91687 18.4591   4
   2  -7 -14 2378.61 157.491   3
   2   7 -14 2032.05 78.8236   3
   2  -7 -14 2829.68 157.609   4
  -2  -7  14 2768.46 115.600   2
   2  -7 -13 784.637 86.0314   3
   2  -7 -13 586.793 73.6598   4
   2   7 -13 442.983 27.1737   3
  -2  -7  13 622.858 53.7645   2
   2  -7 -12 26983.6 664.970   5
   2  -7 -12 24865.1 701.469   3
   2   7 -12 26913.2 629.587   2
  -2  -7  12 25641.1 623.837   2
   2  -7 -12 24771.4 682.372   4
   2  -7 -11 201.530 45.9295   3
   2  -7 -11 187.428 44.5844   4
   2   7 -11 171.405 29.6929   2
  -2  -7  11 227.737 37.1889   2
   2  -7 -11 191.967 33.8786   5
   2  -7 -10 17703.1 499.809   4
   2  -7 -10 17867.8 513.975   3
  -2  -7  10 18337.9 457.931   2
  -2  -7  10 18160.2 457.308   1
  -2  -7   9 49.2395 14.4337   1
   2  -7  -9 67.2558 24.5865   4
   2  -7  -9 63.6683 30.4748   3
  -2  -7   9 36.1095 16.9064   2
  -2  -7   8 28149.0 651.840   1
   2  -7  -8 28144.4 704.245   3
  -2  -7   8 28258.5 676.506   2
   2  -7  -8 27249.3 700.928   4
   2  -7  -7 273.312 41.8921   3
  -2  -7   7 289.459 41.7392   2
   2  -7  -7 263.209 44.8061   4
  -2  -7   7 275.454 31.2105   1
   2  -7  -6 34329.4 800.072   3
   2  -7  -6 32127.9 794.294   4
  -2  -7   6 33196.5 799.575   2
   2  -7  -5 4413.55 173.158   4
   2  -7  -5 4776.67 173.778   3
  -2  -7   5 4766.83 178.761   2
  -2  -7   4 6389.88 169.408   2
   2  -7  -4 6253.26 163.313   4
   2   7  -3 52.9473 11.3073   1
   2  -7  -3 23.8837 18.2170   4
  -2  -7   3 43.4889 23.5182   2
  -2  -7   3 25.9820 10.6438   3
  -2  -7   2 13192.3 317.520   3
   2   7  -2 13765.3 340.419   1
   2   7  -2 13218.2 310.785   3
  -2  -7   2 13015.7 361.043   2
   2  -7  -2 12412.8 348.177   4
   2  -7  -1 7.56555 19.6908   4
   2   7  -1 11.2938 6.69753   3
  -2   7   1-11.3222 25.6518   1
  -2  -7   1 33.6259 13.7722   3
  -2  -7   0 20678.0 493.342   3
  -2   7   0 20808.7 531.264   1
   2   7   0 21661.9 486.629   3
   2  -7   0 19706.5 501.540   4
   2   7   1 11922.5 294.180   3
   2  -7   1 10568.6 295.492   4
  -2   7  -1 11533.1 326.755   1
  -2  -7  -1 10988.4 298.393   3
  -2   7  -2 40980.1 945.515   1
   2  -7   2 41319.2 890.464   3
   2  -7   2 37972.6 903.719   4
   2   7   2 41707.0 913.491   3
  -2  -7  -2 40189.1 921.493   3
   2  -7   3 28.9998 13.0498   4
  -2  -7  -3 23.8182 23.0205   3
   2  -7   3 24.3802 14.2421   3
   2  -7   4 33188.2 737.188   4
  -2  -7  -4 34183.9 783.838   3
   2  -7   4 31939.1 730.228   3
   2  -7   5 254.191 22.7695   4
   2  -7   5 275.287 22.7101   3
   2  -7   5 263.788 22.6355   2
  -2  -7  -5 276.217 39.5489   3
   2  -7   6 23761.9 387.707   3
  -2  -7  -6 23503.6 496.716   3
  -2  -7  -7 285.790 54.1097   3
   2  -7   7 300.602 21.6247   3
  -2  -7  -8 13645.8 411.698   3
  -2  -7  -9 1795.70 120.331   3
   2  -7   9 1731.60 64.4145   3
  -2   7 -10 1128.87 60.5678   3
  -2  -7 -10 1278.01 103.872   3
  -2  -7 -11 2341.62 151.494   3
  -2  -7 -11 2479.06 144.530   4
  -2   7 -11 2371.57 98.4548   3
  -2  -7 -12 23311.1 633.087   4
  -2   7 -12 22096.1 543.490   3
  -2  -7 -12 22885.2 657.811   3
  -2  -7 -13 372.273 67.1805   3
  -2  -7 -13 362.480 53.8890   4
  -2   7 -13 375.374 40.5339   3
  -2   7 -14 6811.34 222.162   3
  -2  -7 -14 6613.76 303.342   3
  -2  -7 -14 6914.55 284.082   4
  -2  -7 -15 548.188 68.5707   4
  -2  -7 -15 699.617 101.848   3
  -2  -7 -16 1014.80 116.542   3
  -2  -7 -16 1029.97 100.147   4
  -2  -7 -17 274.166 68.7288   3
  -2  -7 -17 207.999 47.9914   4
  -2  -7 -18 2872.02 179.178   4
  -2  -7 -18 2655.90 208.370   3
  -2  -7 -19 85.9411 30.1218   4
  -2  -7 -19 178.854 64.7038   3
  -2  -7 -20 294.845 91.7989   3
  -2  -7 -20 196.931 58.2360   4
  -2  -7 -21 39.0783 49.9279   3
   2  -8 -22 1164.28 149.522   3
   2  -8 -21 45.5180 35.5160   3
   2  -8 -20 35.0635 44.7664   3
   2  -8 -19 905.798 119.382   3
   2  -8 -18 2895.72 206.907   3
   2  -8 -17 3104.36 206.821   3
   2  -8 -16 7880.13 343.961   3
   2  -8 -15 10608.5 408.452   3
   2  -8 -15 10663.0 393.484   4
  -2  -8  15 11418.1 315.333   2
   2  -8 -14 14168.4 460.814   4
   2  -8 -14 13738.2 474.378   3
  -2  -8  14 14566.8 383.001   2
  -2  -8  13 14801.3 389.492   2
   2  -8 -13 14438.7 476.540   3
   2  -8 -13 14817.2 463.940   4
   2  -8 -12 12317.8 405.053   4
   2  -8 -12 12308.0 414.460   3
   2  -8 -12 13068.2 379.240   5
  -2  -8  12 12418.6 340.948   2
   2  -8 -11 8200.58 301.224   4
  -2  -8  11 8158.94 250.148   2
   2  -8 -11 8521.87 312.500   3
   2  -8 -11 9172.39 283.315   5
   2  -8 -10 5691.01 228.627   4
   2  -8 -10 5702.13 233.035   3
  -2  -8  10 5358.49 188.287   2
   2  -8  -9 3335.20 166.827   3
  -2  -8   9 3374.66 131.670   1
  -2  -8   9 3445.31 143.684   2
   2  -8  -9 3530.35 169.562   4
  -2  -8   8 1790.10 87.1826   1
  -2  -8   8 1700.70 100.271   2
   2  -8  -8 1762.71 112.754   4
   2  -8  -8 1742.75 109.831   3
   2  -8  -7 888.493 78.1404   4
  -2  -8   7 789.517 69.7380   2
   2  -8  -7 881.494 69.7159   3
   2  -8  -6 88.0202 26.7615   3
  -2  -8   6 76.1652 14.2754   2
   2  -8  -6 48.0863 21.0296   4
   2  -8  -5 1393.85 88.7589   3
   2  -8  -5 1425.91 92.3011   4
  -2  -8   5 1454.55 92.3610   2
  -2  -8   4 6132.75 180.386   2
   2  -8  -4 6384.15 171.448   3
   2  -8  -4 6351.76 182.840   4
  -2  -8   3 2995.80 135.008   2
   2   8  -3 3286.42 125.510   1
   2  -8  -3 3044.54 134.236   4
   2  -8  -3 3033.24 126.761   3
  -2  -8   3 3035.19 99.4361   3
  -2  -8   2 4108.54 164.060   2
  -2  -8   2 4387.70 133.822   3
   2  -8  -2 4088.54 159.999   4
   2   8  -2 4306.23 152.676   1
  -2   8   2 4435.80 181.361   1
  -2   8   1 270.632 42.3183   1
   2   8  -1 81.6507 22.3488   1
   2  -8  -1 119.974 24.8249   4
  -2  -8   1 100.952 18.4196   3
   2  -8   0 924.344 64.2436   4
  -2  -8   0 1030.91 62.4917   3
  -2   8   0 946.058 75.1235   1
  -2  -8  -1 985.723 64.3403   3
  -2   8  -1 952.363 75.6781   1
   2  -8   1 949.313 64.5960   4
   2  -8   2 13.7218 19.9638   4
  -2   8  -2 33.5600 21.5343   1
   2  -8   2 16.8787 10.8659   3
  -2  -8  -2 35.5784 20.9663   3
  -2  -8  -3 3256.54 136.958   3
   2  -8   3 3177.59 107.870   3
   2  -8   3 3109.42 120.111   4
  -2  -8  -4 2923.44 135.500   3
   2  -8   4 2939.45 100.274   3
   2  -8   4 3069.06 112.571   4
   2  -8   5 15568.5 338.192   4
   2  -8   5 14211.4 324.553   2
  -2  -8  -5 15097.9 391.099   3
   2  -8   6 9765.90 240.227   3
   2  -8   6 11207.1 260.236   2
  -2  -8  -7 7504.68 218.365   3
   2  -8   7 717.589 53.1498   2
  -2  -8  -8 14983.6 446.495   3
  -2  -8  -9 6184.34 251.817   3
  -2  -8 -10 8676.31 323.174   3
  -2  -8 -10 9239.57 327.803   4
  -2  -8 -11 6753.09 284.188   3
  -2  -8 -11 6823.93 275.614   4
  -2  -8 -12 2442.21 153.202   4
  -2  -8 -12 2374.52 165.491   3
  -2  -8 -13 2257.77 149.764   4
  -2  -8 -13 2159.61 158.189   3
  -2  -8 -14-16.5673 25.3967   3
  -2  -8 -14 27.9420 36.8530   4
  -2  -8 -15 55.3707 22.1119   3
  -2  -8 -15-23.6682 37.8834   4
  -2  -8 -16 348.880 66.1107   3
  -2  -8 -16 396.660 61.0159   4
  -2  -8 -17 4897.54 285.922   3
  -2  -8 -17 5061.29 259.655   4
  -2  -8 -18 7555.44 378.990   3
  -2  -8 -18 8271.26 348.569   4
  -2  -8 -19 4369.98 286.691   3
  -2  -8 -19 4800.43 258.878   4
  -2  -8 -20 6042.92 354.326   3
   2  -9 -21 6262.86 360.732   3
   2  -9 -20 188.424 72.5040   3
   2  -9 -19 6020.64 323.241   3
   2  -9 -18 10.6618 26.8523   3
   2  -9 -17 2358.02 180.143   3
   2  -9 -16 622.240 93.0296   3
   2  -9 -16 666.802 84.9338   4
   2  -9 -15 290.799 60.6329   3
   2  -9 -15 281.618 58.6542   4
   2  -9 -14 45.5044 36.3308   4
   2  -9 -14 61.7094 31.3332   3
  -2  -9  13 3654.50 142.881   2
   2  -9 -13 3300.39 190.107   3
   2  -9 -13 3563.76 194.665   4
   2  -9 -12 179.172 34.7323   5
   2  -9 -12 208.442 49.0939   4
  -2  -9  12 190.654 35.5829   2
   2  -9 -12 234.297 53.6268   3
   2  -9 -11 14256.5 457.563   3
  -2  -9  11 15058.5 392.256   2
   2  -9 -11 13704.8 451.569   4
  -2  -9  10 132.154 24.2524   2
   2  -9 -10 168.761 40.0176   3
   2  -9 -10 178.079 45.9768   4
  -2  -9   9 37082.1 872.760   2
   2  -9  -9 36877.8 922.892   4
   2  -9  -9 36143.0 918.127   3
   2  -9  -8 55.0258 32.8697   4
   2  -9  -8 40.8019 24.9512   3
  -2  -9   8 40.7004 27.6333   2
  -2  -9   7 29607.9 757.016   2
   2  -9  -7 30298.7 758.039   3
   2  -9  -7 30422.2 768.057   4
   2  -9  -6 303.572 49.8131   3
  -2  -9   6 277.074 33.6225   2
   2  -9  -6 279.981 44.2623   4
  -2  -9   5 9215.77 301.304   2
   2  -9  -5 9239.96 300.884   4
   2  -9  -5 9322.23 289.498   3
   2  -9  -4 256.957 42.1499   4
  -2  -9   4 254.165 43.8662   2
   2  -9  -4 243.808 36.8990   3
  -2  -9   4 38.1704 11.9590   3
   2   9  -3 51.8311 29.7596   1
  -2  -9   3 55.4162 31.4595   2
   2  -9  -3 57.6637 27.7526   4
   2  -9  -3 37.2620 18.0263   3
  -2  -9   3 30.9146 12.0237   3
   2   9  -2 515.343 47.4266   1
   2  -9  -2 556.310 58.2805   4
   2  -9  -2 549.202 49.1488   3
  -2   9   2 538.019 63.7522   1
  -2  -9   2 516.035 58.4075   2
  -2  -9   2 565.594 41.4267   3
  -2   9   1 4188.79 182.272   1
   2  -9  -1 4190.96 166.097   4
   2   9  -1 4333.61 164.099   1
   2  -9  -1 4035.87 146.660   3
  -2  -9   1 4418.47 144.549   3
   2  -9   0 216.631 40.7744   4
  -2  -9   0 272.754 35.7021   3
  -2   9   0 260.276 40.1496   1
   2  -9   0 260.495 32.7527   3
  -2  -9  -1 21946.8 540.918   3
   2  -9   1 21678.5 547.168   4
  -2   9  -1 22091.3 583.045   1
  -2  -9  -2 379.441 46.8656   3
  -2   9  -2 253.636 45.9927   1
   2  -9   2 309.852 39.7053   4
   2  -9   3 23428.6 546.459   3
  -2  -9  -3 23496.3 594.579   3
   2  -9   3 23722.0 576.122   4
  -2  -9  -4 192.512 15.7113   5
   2  -9   4 183.694 25.6157   3
  -2  -9  -4 225.975 41.7175   3
   2  -9   4 236.348 30.9848   4
   2  -9   5 21793.7 369.424   4
  -2  -9  -5 21253.2 435.946   3
   2  -9   5 20727.0 354.646   2
  -2  -9  -6 262.391 45.5494   3
   2  -9   6 216.328 25.9325   2
  -2  -9  -7 8910.40 294.151   3
   2  -9   7 7523.86 190.137   2
  -2  -9  -8 96.7524 39.3044   3
  -2  -9  -9 4.12946 29.9638   3
  -2  -9 -10 696.602 74.7836   4
  -2  -9 -10 655.839 88.9942   3
  -2  -9 -11 4977.96 234.451   4
  -2  -9 -11 4996.65 242.333   3
  -2  -9 -12 388.206 70.9588   4
  -2  -9 -12 436.653 72.2144   3
  -2  -9 -13 10706.4 390.864   4
  -2  -9 -13 10125.5 402.887   3
  -2  -9 -14 19.5001 55.2828   3
  -2  -9 -14 29.1933 23.9887   4
  -2  -9 -15 6324.81 296.281   4
  -2  -9 -15 5801.32 299.151   3
  -2  -9 -16 36.8542 63.2028   3
  -2  -9 -16-3.46144 34.5663   4
  -2  -9 -17 4931.13 264.153   4
  -2  -9 -17 4207.98 269.589   3
  -2  -9 -18 440.512 106.196   3
  -2  -9 -19 211.321 79.6846   3
  -2  -9 -19 200.000 35.4723   4
  -2  -9 -20 73.9095 46.5164   4
   2 -10 -20 99.7630 28.2199   3
   2 -10 -19 1586.97 165.603   3
   2 -10 -18 859.985 109.201   3
   2 -10 -17 2927.48 205.814   3
   2 -10 -16 8421.51 370.650   3
   2 -10 -16 9146.47 387.453   4
   2 -10 -15 5682.14 288.059   3
   2 -10 -15 5736.48 281.382   4
   2 -10 -14 8531.18 354.156   4
   2 -10 -14 8666.72 357.192   3
   2 -10 -13 8775.66 350.497   3
   2 -10 -13 8676.24 348.235   4
   2 -10 -12 5697.37 218.088   5
   2 -10 -12 5377.40 253.104   4
  -2 -10  12 5665.24 193.498   2
   2 -10 -12 5242.12 252.646   3
  -2 -10  11 5762.56 199.977   2
   2 -10 -11 5268.44 249.063   3
   2 -10 -11 5535.09 251.390   4
  -2 -10  10 578.717 57.8414   2
   2 -10 -10 595.199 67.3103   3
   2 -10 -10 506.699 68.0137   4
   2 -10  -9 819.332 82.9685   3
  -2 -10   9 968.239 79.1026   2
   2 -10  -9 952.081 94.6386   4
   2 -10  -8-10.6659 32.3687   4
   2 -10  -8-0.34311 16.3892   3
  -2 -10   8 14.2962 17.2834   2
   2 -10  -7 520.016 58.4569   3
  -2 -10   7 438.821 49.3392   2
   2 -10  -7 642.711 70.2141   4
   2 -10  -6 4824.16 211.941   4
  -2 -10   6 5269.21 218.315   2
   2 -10  -6 5153.84 204.428   3
   2 -10  -5 2319.96 124.626   3
  -2 -10   5 2483.70 137.785   2
   2 -10  -5 2558.24 139.805   4
  -2 -10   4 12213.5 276.805   2
   2 -10  -4 11677.6 252.628   3
   2 -10  -4 11897.3 281.268   4
   2  10  -3 9820.26 291.535   1
   2 -10  -3 9184.80 281.343   3
  -2  10   3 9474.81 323.245   1
   2 -10  -3 9384.37 302.864   4
  -2 -10   3 8561.37 241.431   3
  -2 -10   3 9649.78 305.518   2
   2 -10  -2 12037.2 364.548   4
  -2  10   2 12418.3 390.241   1
   2 -10  -2 12118.2 341.659   3
   2  10  -2 12512.3 358.048   1
  -2 -10   2 12311.5 371.407   2
  -2 -10   2 12312.0 315.728   3
  -2 -10   1 341.791 39.2789   3
   2 -10  -1 301.163 39.1898   3
   2  10  -1 255.690 42.9705   1
  -2  10   1 244.421 46.4363   1
   2 -10  -1 297.069 46.6510   4
   2 -10   0 3626.44 135.137   3
   2 -10   0 3785.97 160.176   4
  -2 -10   0 3976.64 147.712   3
  -2  10   0 3701.95 176.981   1
  -2 -10  -1 1019.59 70.0430   3
   2 -10   1 930.424 56.9362   3
   2 -10   1 917.311 73.5481   4
  -2  10  -1 969.980 86.3728   1
  -2 -10  -2 425.133 48.6360   3
   2 -10   2 357.727 47.6391   4
   2 -10   2 363.396 32.3595   3
  -2  10  -2 409.998 50.4375   1
   2 -10   3 302.055 26.1493   3
  -2 -10  -3 284.180 38.8858   3
   2 -10   3 284.238 40.0009   4
   2 -10   3 159.671 27.9855   3
  -2 -10  -4 2597.60 131.154   3
  -2 -10  -4 1989.90 62.8337   5
   2 -10   4 2659.25 107.984   2
   2 -10   4 2554.93 75.8878   3
   2 -10   4 2743.34 114.454   4
  -2 -10  -5 4137.27 180.553   3
   2 -10   5 3515.77 97.3189   3
   2 -10   5 4361.79 148.938   4
   2 -10   5 3993.03 143.007   2
  -2 -10  -6 12320.3 386.797   3
   2 -10   6 12067.8 323.765   2
   2 -10   6 12778.7 332.612   4
  -2 -10  -7 10474.9 343.694   3
   2 -10   7 9576.31 247.599   2
  -2 -10  -8 17326.7 412.122   3
   2 -10   8 8248.27 203.118   2
  -2 -10  -9 9512.40 352.114   3
  -2 -10  -9 10175.6 365.356   4
  -2 -10 -10 6310.84 276.796   3
  -2 -10 -10 6355.42 279.251   4
  -2 -10 -11 4723.56 240.480   3
  -2 -10 -11 4889.95 243.137   4
  -2 -10 -12 2307.93 163.896   4
  -2 -10 -12 2272.99 166.349   3
  -2 -10 -13 396.876 73.6444   3
  -2 -10 -13 348.529 59.7668   4
  -2 -10 -14 598.375 88.4385   3
  -2 -10 -14 583.099 78.3816   4
  -2 -10 -15 68.3860 43.6281   4
  -2 -10 -15-4.84840 40.8151   3
  -2 -10 -16 1056.44 133.851   3
  -2 -10 -16 1017.83 113.129   4
  -2 -10 -17 2339.16 200.529   3
  -2 -10 -17 2716.76 198.166   4
  -2 -10 -18 7688.61 359.866   4
  -2 -10 -18 6580.29 367.449   3
  -2 -10 -19 4606.57 270.780   4
  -2 -10 -19 3882.45 282.931   3
  -2 -10 -20 7135.19 356.758   4
   2 -11 -19 535.115 99.5938   3
   2 -11 -18 2544.88 205.702   3
   2 -11 -17 605.902 96.0770   3
   2 -11 -16 591.619 93.5233   4
   2 -11 -16 429.253 89.3042   3
   2 -11 -15 719.711 97.8274   4
   2 -11 -15 641.687 94.8956   3
   2 -11 -14 313.356 55.0696   3
   2 -11 -14 250.308 66.5525   4
   2 -11 -13 271.278 64.5952   4
   2 -11 -13 269.174 71.4661   3
   2 -11 -12 9089.16 371.274   3
   2 -11 -12 10995.6 335.324   5
   2 -11 -12 10152.2 389.471   4
   2 -11 -11 17.7243 38.1392   3
  -2 -11  11 66.2731 22.9691   2
   2 -11 -11 28.6189 25.9220   4
   2 -11 -10 14508.8 474.814   4
  -2 -11  10 15203.4 414.954   2
   2 -11 -10 13476.9 458.195   3
   2 -11  -9 126.451 35.8232   3
   2 -11  -9 145.281 46.6250   4
  -2 -11   9 134.868 39.0519   2
   2 -11  -8 26577.6 713.987   3
   2 -11  -8 26096.6 727.569   4
  -2 -11   8 27202.5 701.660   2
  -2 -11   7 233.108 32.2494   2
   2 -11  -7 320.827 55.1350   3
   2 -11  -7 341.778 59.8181   4
   2 -11  -6 13699.5 434.793   4
   2 -11  -6 13834.2 417.629   3
  -2 -11   6 14466.0 439.711   2
   2 -11  -5 44.1866 44.5516   4
  -2 -11   5 24.5521 34.7017   2
   2 -11  -5 17.2153 26.2083   3
   2 -11  -4 707.077 72.1499   4
  -2 -11   4 719.656 72.0683   2
   2 -11  -4 619.266 59.0050   3
  -2  11   4 589.002 52.2481   1
   2 -11  -3 127.817 35.6833   3
   2 -11  -3 85.0814 31.8314   4
   2  11  -3 157.745 23.2533   1
  -2  11   3 132.647 35.7480   1
  -2 -11   3 125.326 35.5479   2
  -2 -11   3 140.834 25.2418   3
   2 -11  -2 2417.40 117.386   3
   2  11  -2 2517.77 131.169   1
  -2  11   2 2605.27 152.722   1
  -2 -11   2 2605.60 102.517   3
  -2 -11   2 2531.14 140.181   2
   2 -11  -2 2548.56 138.376   4
  -2  11   1 31.6418 25.3512   1
   2 -11  -1 23.0657 32.7761   4
   2 -11  -1 5.22419 14.1676   3
  -2 -11   1 34.2865 21.4592   3
   2  11  -1 29.0643 19.0767   1
   2 -11   0 8653.29 286.969   4
   2  11   0 8386.97 287.140   1
   2 -11   0 8594.53 252.761   3
  -2  11   0 8515.68 309.083   1
  -2 -11   0 9006.56 267.370   3
   2 -11   1 482.484 44.4099   3
   2 -11   1 449.402 63.7956   4
  -2 -11  -1 495.129 53.4793   3
  -2  11  -1 389.349 59.8896   1
   2 -11   2 25024.3 542.665   3
  -2 -11  -2 25106.9 600.449   3
   2 -11   2 23678.1 596.140   4
  -2  11  -2 25731.8 650.332   1
  -2 -11  -3 414.384 54.4204   3
   2 -11   3 469.837 36.4266   3
   2 -11   3 473.793 59.3563   4
   2 -11   4 25583.1 530.202   2
  -2 -11  -4 26838.1 586.984   3
   2 -11   4 26538.8 463.723   3
   2 -11   4 26567.7 549.238   4
   2 -11   5 112.601 31.0117   2
  -2 -11  -5 114.325 39.0443   3
   2 -11   5 59.1485 20.8439   4
  -2 -11  -6 12252.0 395.688   3
   2 -11   6 12244.4 336.448   2
   2 -11   6 12456.6 340.901   4
  -2 -11  -7 507.869 70.8664   3
   2 -11   7 485.059 39.7941   2
  -2 -11  -8 50.0613 23.2482   4
  -2 -11  -8 67.7797 38.0189   3
  -2 -11  -9 314.870 58.0510   3
  -2 -11  -9 315.958 56.2895   4
  -2 -11 -10 1511.27 125.764   3
  -2 -11 -10 1525.39 128.882   4
  -2 -11 -11 2666.55 182.696   3
  -2 -11 -11 2817.59 183.204   4
  -2 -11 -12 9112.44 375.916   3
  -2 -11 -12 9308.97 379.711   4
  -2 -11 -13 2453.24 186.709   3
  -2 -11 -13 2568.70 182.248   4
  -2 -11 -14 6938.90 345.801   3
  -2 -11 -14 7701.66 345.664   4
  -2 -11 -15 2300.63 189.535   3
  -2 -11 -15 2344.09 184.037   4
  -2 -11 -16 8898.11 426.433   3
  -2 -11 -16 10562.0 434.088   4
  -2 -11 -17 1243.13 152.573   3
  -2 -11 -17 1353.97 151.966   4
  -2 -11 -18 4162.47 289.483   3
  -2 -11 -18 4706.77 283.493   4
  -2 -11 -19 723.581 112.142   4
   2 -12 -18 2134.30 183.144   3
   2 -12 -17 2919.01 219.488   3
   2 -12 -16 4873.03 280.687   4
   2 -12 -16 3838.93 249.576   3
   2 -12 -15 7445.38 358.817   3
   2 -12 -15 8535.82 381.596   4
   2 -12 -14 6625.98 314.767   3
   2 -12 -14 6290.75 311.014   4
   2 -12 -13 9398.59 385.340   4
   2 -12 -13 8576.64 363.592   3
   2 -12 -12 5319.27 269.879   4
   2 -12 -12 4856.16 256.697   3
   2 -12 -12 5794.71 223.652   5
   2 -12 -11 1145.03 114.742   4
   2 -12 -11 1102.26 110.458   3
  -2 -12  10 5819.42 219.363   2
   2 -12 -10 4997.17 247.237   3
   2 -12 -10 4997.02 251.474   4
   2 -12  -9 1053.57 102.142   3
   2 -12  -9 1166.90 110.458   4
  -2 -12   9 992.325 84.5906   2
   2 -12  -8 86.5682 32.2017   3
  -2 -12   8 77.6320 19.4057   2
   2 -12  -8 73.2048 26.9798   4
   2 -12  -7 5730.19 243.543   3
  -2 -12   7 5808.57 252.456   2
   2 -12  -7 6230.37 264.148   4
   2 -12  -6 213.202 55.8003   4
   2 -12  -6 195.856 48.6504   3
  -2 -12   6 255.130 53.0608   2
   2 -12  -5 13586.3 411.597   3
  -2 -12   5 13503.7 429.557   2
   2 -12  -5 13653.3 436.477   4
  -2  12   4 167.205 53.9294   1
   2 -12  -4 243.022 47.7097   3
  -2 -12   4 260.967 55.2103   2
   2 -12  -4 231.136 62.3292   4
   2 -12  -3 19582.8 561.962   4
  -2  12   3 19673.9 581.195   1
  -2 -12   3 18564.2 474.733   3
   2 -12  -3 20674.7 530.713   3
  -2 -12   3 19772.3 558.431   2
   2  12  -3 21607.2 556.357   1
  -2 -12   2 694.386 75.2843   2
   2 -12  -2 750.987 69.9506   3
  -2 -12   2 717.860 54.7894   3
   2  12  -2 668.187 68.7996   1
   2 -12  -2 723.155 84.5272   4
  -2  12   2 705.744 88.1629   1
  -2  12   1 18966.1 560.802   1
   2  12  -1 19091.5 529.510   1
   2 -12  -1 18891.0 492.761   3
   2 -12  -1 18628.0 533.153   4
  -2 -12   1 19349.4 482.939   3
  -2 -12   0 848.056 69.4507   3
   2  12   0 715.699 75.0883   1
   2 -12   0 762.551 77.6695   4
   2 -12   0 778.536 63.5720   3
  -2  12   0 628.334 75.0941   1
   2 -12   1 9818.26 329.737   4
   2 -12   1 10093.2 283.785   3
   2  12   1 10213.9 342.838   1
  -2  12  -1 10261.3 364.332   1
  -2 -12  -1 10706.8 319.609   3
  -2 -12  -2 128.818 37.4509   3
   2 -12   2 195.929 31.0259   3
   2 -12   2 156.107 37.6652   4
   2 -12   3 27.7938 27.0067   4
   2 -12   3 54.0645 13.8044   3
  -2 -12  -3 78.2562 30.9423   3
   2 -12   4 1174.47 82.6086   2
  -2 -12  -4 1089.24 96.2354   3
   2 -12   4 1173.91 84.6070   4
   2 -12   5 4230.40 169.122   2
  -2 -12  -5 4718.95 208.278   3
   2 -12   5 4276.14 172.804   4
   2 -12   6 4923.94 181.318   4
  -2 -12  -6 4592.00 217.046   3
   2 -12   6 4491.38 176.030   2
  -2 -12  -7 12176.6 416.023   3
  -2 -12  -7 12493.9 439.089   4
  -2 -12  -8 6194.97 272.781   3
  -2 -12  -8 6401.39 289.935   4
  -2 -12  -9 11665.8 420.195   3
  -2 -12  -9 12165.9 442.435   4
  -2 -12 -10 866.339 110.408   4
  -2 -12 -10 972.985 109.224   3
  -2 -12 -11 5702.23 282.565   4
  -2 -12 -11 4955.24 265.806   3
  -2 -12 -12 279.395 81.0905   3
  -2 -12 -12 296.316 50.0219   4
  -2 -12 -13 1851.05 158.284   4
  -2 -12 -13 1664.06 160.006   3
  -2 -12 -14 31.9905 34.3596   3
  -2 -12 -14 47.2972 50.7466   4
  -2 -12 -15 248.218 67.3092   3
  -2 -12 -15 173.309 59.9671   4
  -2 -12 -16 3986.45 275.271   3
  -2 -12 -16 4508.38 274.702   4
  -2 -12 -17 3728.76 266.312   3
  -2 -12 -17 4331.78 272.548   4
  -2 -12 -18 4275.72 286.036   4
   2 -13 -17 3986.37 266.505   3
   2 -13 -16 3605.77 249.765   4
   2 -13 -16 3133.46 230.740   3
   2 -13 -15 101.001 48.0032   4
   2 -13 -15 74.5825 62.5728   3
   2 -13 -14 73.8843 55.5604   4
   2 -13 -14 102.255 30.8104   3
   2 -13 -13 1815.19 155.433   3
   2 -13 -13 1787.17 162.760   4
   2 -13 -12 67.3671 28.1611   3
   2 -13 -12-12.5126 26.3704   4
   2 -13 -11 4957.58 255.659   3
   2 -13 -11 5953.09 286.773   4
   2 -13 -10 69.0660 39.7233   3
   2 -13 -10 35.1250 26.8757   4
   2 -13  -9 10679.4 398.546   3
   2 -13  -9 11112.5 421.283   4
  -2 -13   9 12382.8 384.654   2
  -2 -13   9 11365.8 351.418   4
   2 -13  -8 676.986 93.7242   4
   2 -13  -8 677.843 82.8737   3
  -2 -13   8 658.396 72.6448   2
   2 -13  -7 10526.5 370.485   3
  -2 -13   7 11009.7 389.636   2
   2 -13  -7 11160.2 400.909   4
   2 -13  -6 3131.32 168.917   3
   2 -13  -6 3178.46 185.245   4
  -2 -13   6 3223.70 186.134   2
  -2 -13   5 2062.78 144.181   2
   2 -13  -5 2092.77 145.014   4
   2 -13  -5 2240.16 134.550   3
  -2  13   5 2210.60 151.844   1
  -2 -13   4 114.157 36.7738   2
   2 -13  -4 146.779 39.5131   4
   2 -13  -4 99.8156 38.4135   3
  -2  13   4 56.5102 41.9416   1
   2 -13  -3 238.257 47.0188   3
   2  13  -3 197.875 36.5524   1
   2 -13  -3 161.964 49.5728   4
  -2 -13   3 236.140 44.8727   2
  -2  13   3 186.382 55.0509   1
  -2  13   2 1613.50 133.469   1
   2 -13  -2 1737.52 128.063   4
  -2 -13   2 1497.43 115.179   2
   2  13  -2 1612.46 114.046   1
  -2 -13   2 1728.82 85.1965   3
   2 -13  -2 1673.27 102.689   3
  -2 -13   1 9351.68 272.662   3
   2 -13  -1 8348.50 317.243   4
  -2  13   1 8831.86 340.122   1
   2 -13  -1 9154.97 282.877   3
   2  13  -1 8898.66 315.089   1
  -2 -13   1 8420.25 322.566   2
  -2 -13   0 1878.10 105.726   3
  -2  13   0 1802.34 136.646   1
   2  13   0 1589.94 113.655   1
   2 -13   0 1667.33 120.820   4
   2 -13   0 1799.65 102.332   3
   2  13   1 15128.9 474.497   1
   2 -13   1 15484.3 466.852   4
  -2  13  -1 15846.0 505.842   1
  -2 -13  -1 16145.1 446.209   3
   2 -13   1 15881.6 411.441   3
   2  13   2 68.0835 21.0839   1
   2 -13   2 117.413 34.7363   4
  -2 -13  -2 154.887 38.2020   3
  -2 -13  -3 9752.06 329.074   3
   2 -13   3 9641.21 321.106   4
  -2 -13  -4 134.542 44.5717   3
   2 -13   4 81.4493 20.8588   4
   2 -13   4 114.131 45.0229   2
  -2 -13  -5 6796.53 307.370   4
   2 -13   5 7678.14 257.626   2
  -2 -13  -5 7638.40 295.895   3
   2 -13   5 7674.96 266.071   4
  -2 -13  -6 22.8032 33.0895   3
  -2 -13  -6-12.7642 47.4067   4
   2 -13   6 30.3831 29.0399   4
  -2 -13  -7 2117.57 158.316   4
  -2 -13  -7 2015.84 141.589   3
  -2 -13  -8 817.033 99.4506   4
  -2 -13  -8 769.500 93.0616   3
  -2 -13  -9 777.048 93.2604   3
  -2 -13  -9 857.694 99.8275   4
  -2 -13 -10 3156.65 204.930   3
  -2 -13 -10 3225.56 214.462   4
  -2 -13 -11 5410.99 285.100   3
  -2 -13 -11 5775.57 297.068   4
  -2 -13 -12 4084.71 249.410   3
  -2 -13 -12 4439.49 263.170   4
  -2 -13 -13 10455.5 449.575   3
  -2 -13 -13 12579.1 486.447   4
  -2 -13 -14 4697.74 285.654   3
  -2 -13 -15 11950.1 484.123   4
  -2 -13 -15 9795.08 456.420   3
  -2 -13 -16 6247.82 354.791   3
   2 -14 -16 5512.95 325.836   3
   2 -14 -15 658.981 115.631   3
   2 -14 -15 657.175 109.372   4
   2 -14 -14 7947.64 375.533   3
   2 -14 -14 9272.81 412.658   4
   2 -14 -13 1089.46 140.801   4
   2 -14 -13 1181.47 132.102   3
   2 -14 -12 3917.74 245.166   4
   2 -14 -12 3685.15 224.938   3
   2 -14 -11 819.590 102.057   3
   2 -14 -11 783.222 106.531   4
   2 -14 -10 180.243 57.5606   4
   2 -14 -10 116.641 26.1656   3
   2 -14  -9 782.953 103.680   4
   2 -14  -9 883.425 100.701   3
  -2 -14   8 2449.03 142.894   4
   2 -14  -8 2863.95 186.530   4
  -2 -14   8 3175.57 179.041   2
   2 -14  -8 2745.95 172.334   3
   2 -14  -7 446.858 69.1623   3
  -2 -14   7 404.091 55.0359   2
  -2 -14   7 292.490 46.8767   4
   2 -14  -7 401.183 72.7181   4
  -2  14   6 8689.23 361.573   1
   2 -14  -6 9136.55 331.567   3
  -2 -14   6 8823.93 321.007   4
   2 -14  -6 8953.85 355.736   4
  -2 -14   6 8987.96 352.309   2
  -2 -14   5 289.484 68.6183   2
   2 -14  -5 402.538 67.6681   3
  -2  14   5 250.187 64.6737   1
   2 -14  -5 406.647 78.2059   4
  -2 -14   4 19575.8 582.883   2
  -2  14   4 18361.7 600.116   1
   2 -14  -4 20431.3 554.501   3
   2 -14  -4 18958.4 589.605   4
  -2  14   3 1089.80 110.020   1
   2 -14  -3 1397.84 107.411   3
  -2 -14   3 1238.11 117.720   2
   2 -14  -3 1386.85 124.959   4
   2  14  -2 25595.0 691.284   1
   2 -14  -2 24575.3 700.595   4
   2 -14  -2 26674.6 656.599   3
  -2  14   2 23838.6 718.437   1
  -2 -14   2 23596.5 692.461   2
   2  14  -1 23.8584 42.1583   1
   2 -14  -1 65.9469 33.4119   4
   2 -14  -1 78.4550 42.0104   3
  -2  14   1 66.1440 46.3159   1
  -2 -14   1 68.0025 55.7730   2
  -2 -14   0 14695.1 402.969   3
   2 -14   0 13613.4 441.467   4
   2  14   0 13349.0 440.749   1
  -2  14   0 13130.7 468.450   1
   2 -14   1 200.208 46.3821   4
  -2 -14  -1 214.137 52.0269   3
  -2  14  -1 68.8301 37.2620   1
   2  14   1 119.557 34.6056   1
  -2 -14  -2 1258.35 95.9265   3
   2 -14   2 1180.38 99.4730   4
  -2 -14  -2 963.891 95.9614   4
   2  14   2 1094.88 103.147   1
   2 -14   3 995.966 87.8185   2
   2 -14   3 986.660 93.9631   4
   2  14   3 750.362 78.7052   1
  -2 -14  -3 764.338 98.1466   4
  -2 -14  -3 924.781 85.2109   3
  -2 -14  -4 327.658 62.9120   3
   2 -14   4 390.455 62.3282   4
  -2 -14  -4 307.720 32.5982   4
   2 -14   4 355.839 58.6525   2
  -2 -14  -5 421.774 60.4488   4
  -2 -14  -5 578.390 76.1721   3
   2 -14   5 745.245 78.2606   4
  -2 -14  -6 4777.72 251.162   4
  -2 -14  -6 4850.57 237.772   3
  -2 -14  -7 2747.46 191.252   4
  -2 -14  -7 2932.37 188.414   3
  -2 -14  -8 11777.9 448.883   4
  -2 -14  -8 10706.9 413.402   3
  -2 -14  -9 772.217 102.591   4
  -2 -14  -9 822.728 103.576   3
  -2 -14 -10 6513.52 326.526   4
  -2 -14 -10 5751.03 297.844   3
  -2 -14 -11 1650.01 157.724   4
  -2 -14 -11 1302.30 142.880   3
  -2 -14 -12 3126.13 220.010   3
  -2 -14 -12 3643.37 243.254   4
  -2 -14 -13 923.170 124.618   3
  -2 -14 -13 758.314 108.047   4
  -2 -14 -14 486.746 105.273   3
  -2 -14 -14 523.900 105.169   4
  -2 -14 -15 47.6765 85.2694   3
   2 -15 -15 558.070 97.2832   3
   2 -15 -14 92.1215 26.7414   3
   2 -15 -13-39.7631 57.4149   3
   2 -15 -13 52.6055 32.4500   4
   2 -15 -12 3553.19 247.049   4
   2 -15 -12 3213.20 219.914   3
   2 -15 -11 1691.96 152.920   3
   2 -15 -11 1523.66 146.433   4
   2 -15 -10 6171.71 298.996   3
   2 -15 -10 6889.34 332.497   4
   2 -15  -9 2514.94 195.174   4
   2 -15  -9 2501.94 170.020   3
  -2  15   8 6479.29 325.217   1
   2 -15  -8 7651.32 313.587   3
   2 -15  -8 6980.51 330.859   4
  -2 -15   7 2960.67 164.841   4
   2 -15  -7 2859.08 199.394   4
  -2  15   7 2703.16 204.565   1
   2 -15  -7 3178.72 187.930   3
  -2  15   6 2631.36 184.721   1
   2 -15  -6 2922.73 178.403   3
  -2 -15   6 3111.57 167.213   4
   2 -15  -6 2877.88 195.041   4
  -2 -15   6 2985.32 193.057   2
  -2 -15   5 1701.09 141.905   2
  -2  15   5 1426.96 132.218   1
   2 -15  -5 1574.85 137.520   4
  -2 -15   5 1581.75 119.729   4
   2 -15  -5 1654.96 123.217   3
   2 -15  -4 2651.03 154.003   3
  -2  15   4 2613.89 184.599   1
  -2 -15   4 2541.66 174.913   2
  -2 -15   4 2453.79 157.437   4
   2 -15  -4 2388.02 170.923   4
  -2 -15   3-28.0706 44.1602   4
  -2  15   3-17.0007 29.9564   1
   2 -15  -3 49.6431 42.8354   4
  -2 -15   3 20.9135 19.2183   2
   2 -15  -3 66.6999 32.6400   3
   2  15  -2 249.533 61.0190   1
   2 -15  -2 269.861 56.5265   4
  -2 -15   2 290.226 55.0587   2
  -2 -15   2 96.6444 25.4084   4
  -2  15   2 222.821 53.7696   1
   2  15  -1 129.446 50.3666   1
  -2  15   1 100.091 41.7384   1
  -2 -15   1-9.43135 46.0097   4
   2 -15  -1 104.583 45.3085   4
  -2 -15   1 47.0096 36.9101   2
  -2 -15   0 3787.85 222.496   4
   2 -15   0 4337.16 221.396   4
   2  15   0 4728.20 226.343   1
  -2 -15   0 4332.30 232.577   2
  -2  15   0 4671.93 248.622   1
   2 -15   1 796.149 90.9198   4
   2  15   1 891.387 98.3713   1
  -2 -15  -1 734.926 86.0919   4
  -2 -15  -2 7622.09 334.494   4
   2  15   2 8065.44 330.266   1
   2 -15   2 8304.89 316.576   4
   2  15   3 1946.02 150.550   1
  -2 -15  -3 1784.50 144.836   4
  -2 -15  -3 2171.19 146.041   3
   2 -15   3 2146.54 147.547   4
  -2 -15  -4 3962.64 206.921   3
  -2 -15  -4 3109.52 203.907   4
   2 -15   4 3454.71 186.655   4
   2  15   4 3522.70 205.757   1
  -2 -15  -5 2489.41 178.617   4
  -2 -15  -5 2588.02 172.372   3
  -2 -15  -6 1814.69 141.283   3
  -2 -15  -6 1526.64 141.675   4
  -2 -15  -7-12.2851 23.5197   3
  -2 -15  -7-61.1414 57.9462   4
  -2 -15  -8 60.9172 35.8393   3
  -2 -15  -8 150.504 45.4322   4
  -2 -15  -9 1656.91 160.969   4
  -2 -15  -9 1370.27 137.883   3
  -2 -15 -10 1264.79 132.782   4
  -2 -15 -10 1154.01 139.229   3
  -2 -15 -11 1789.18 163.919   3
  -2 -15 -11 2001.59 183.863   4
  -2 -15 -12 10906.2 461.443   4
  -2 -15 -12 8588.99 409.042   3
  -2 -15 -13 3629.56 249.085   3
   2 -16 -13 6628.13 342.117   3
   2 -16 -12 229.111 63.6364   3
   2 -16 -11 1001.97 109.740   3
   2 -16 -11 1227.55 150.812   4
   2 -16 -10 8.93378 28.0795   3
   2 -16 -10 17.0768 34.2660   4
   2 -16  -9 126.252 43.1466   3
  -2  16   9 174.460 69.4688   1
   2 -16  -9 205.812 60.3309   4
  -2  16   8 36.8474 36.1839   1
   2 -16  -8 13.6733 47.1458   3
   2 -16  -8 47.5575 43.4337   4
   2 -16  -7 4575.29 239.491   3
  -2  16   7 4494.77 266.097   1
   2 -16  -7 4224.62 257.604   4
  -2 -16   6 88.4530 18.1113   4
  -2  16   6 106.195 45.7310   1
   2 -16  -6 190.186 72.3744   4
   2 -16  -6 146.182 57.8252   3
  -2 -16   5 10143.8 378.359   4
   2 -16  -5 9441.63 396.607   4
  -2  16   5 10069.6 414.888   1
  -2 -16   5 9593.12 399.071   2
   2 -16  -4 319.802 84.8072   4
  -2  16   4 261.097 60.7296   1
  -2 -16   4 340.971 77.8254   2
  -2 -16   4 388.410 71.9022   4
  -2  16   3 17965.0 596.784   1
  -2 -16   3 16935.9 557.475   2
   2 -16  -3 17554.3 576.220   4
  -2 -16   3 16654.8 545.757   4
  -2 -16   2 283.348 69.4845   2
   2 -16  -2 216.392 65.7835   4
  -2 -16   2 145.337 39.5065   4
  -2  16   2 148.941 66.5537   1
  -2 -16   1 16708.6 557.378   2
   2  16  -1 18301.0 554.738   1
  -2 -16   1 15145.2 543.026   4
   2 -16  -1 17556.0 554.900   4
  -2  16   1 16706.0 579.896   1
   2  16   0 693.626 87.1599   1
  -2 -16   0 587.147 93.6703   4
  -2  16   0 780.835 91.3100   1
   2 -16   0 780.801 92.9117   4
  -2 -16   0 763.891 108.640   2
  -2 -16  -1 4654.94 257.681   2
  -2 -16  -1 4722.67 258.256   4
   2 -16   1 5263.57 252.495   4
   2  16   1 5449.54 260.530   1
  -2 -16  -2 90.5807 41.2312   4
   2 -16   2 202.616 51.8842   4
   2  16   2 178.490 53.5253   1
   2 -16   3 110.566 58.8905   4
   2  16   3 27.6902 31.9859   1
  -2 -16  -3-15.7533 44.4789   4
  -2 -16  -4 0.36639 30.4592   4
   2  16   4-1.54884 35.2407   1
  -2 -16  -5 2176.94 183.432   4
  -2 -16  -5 2711.77 175.965   3
   2  16   5 2514.55 182.477   1
  -2 -16  -6 122.394 56.8099   3
  -2 -16  -6 71.6303 62.1570   4
  -2 -16  -7 6487.21 311.931   3
  -2 -16  -7 6300.54 326.907   4
  -2 -16  -8 72.1423 32.9069   4
  -2 -16  -8-18.5421 38.3317   3
  -2 -16  -9 7336.38 365.285   4
  -2 -16  -9 7125.11 348.059   3
  -2 -16 -10 68.0623 48.7624   4
  -2 -16 -10 28.7191 33.6403   3
  -2 -16 -11 3947.95 255.711   3
  -2 -16 -12 41.2373 52.1255   3
   2 -17 -12 160.056 63.8819   3
   2 -17 -11 1430.71 150.361   3
   2 -17 -10 3933.75 247.515   3
   2 -17  -9 4542.88 266.834   3
   2 -17  -9 4828.14 298.292   4
  -2  17   9 4878.40 285.463   1
  -2  17   8 3121.48 222.881   1
   2 -17  -8 3255.16 232.157   4
  -2  17   7 3628.49 241.194   1
  -2  17   6 1946.89 175.730   1
   2 -17  -6 2018.45 170.379   4
  -2  17   5 2206.99 184.402   1
   2 -17  -5 1985.14 171.328   4
  -2  17   4 25.6216 33.0872   1
  -2 -17   4 43.0234 32.7712   4
   2 -17  -4 45.0360 37.9862   4
  -2 -17   3 400.626 80.0523   2
  -2 -17   3 314.284 28.9863   4
  -2  17   3 350.925 70.0820   1
   2 -17  -3 320.805 83.1116   4
  -2 -17   2 1273.49 128.404   2
  -2  17   2 1316.70 138.542   1
  -2 -17   2 1131.86 108.957   4
   2 -17  -2 1238.44 132.182   4
  -2 -17   1 262.442 66.8938   2
  -2 -17   1 121.527 45.8897   4
   2  17  -1 217.183 64.6336   1
  -2  17   1 184.342 53.2332   1
   2 -17  -1 297.637 71.4826   4
  -2 -17   0 1897.34 165.781   4
   2 -17   0 2006.62 163.160   4
  -2 -17   0 1829.13 160.164   2
   2  17   0 2125.59 163.762   1
   2 -17   1 2663.05 183.109   4
  -2 -17  -1 1951.57 171.198   2
  -2 -17  -1 2021.21 169.369   4
   2  17   1 2374.36 171.770   1
   2  17   2 4114.61 230.531   1
   2 -17   2 4242.74 235.097   4
  -2 -17  -2 3618.44 239.537   2
  -2 -17  -2 3425.61 222.763   4
   2  17   3 4100.92 237.893   1
  -2 -17  -3 3733.79 237.080   4
   2  17   4 5171.06 278.768   1
  -2 -17  -4 4894.90 280.889   4
   2  17   5 2079.44 180.963   1
  -2 -17  -5 1824.99 175.619   4
  -2 -17  -6 4199.07 267.307   4
   2  17   6 4060.94 257.068   1
  -2 -17  -7 232.844 61.9206   4
  -2 -17  -9 699.165 100.120   3
  -2 -17 -10 835.461 124.485   3
  -2 -17 -11 2587.66 210.538   3
  -2  18   7 703.241 115.425   1
  -2  18   6 7224.31 359.966   1
   2 -18  -6 6753.53 352.767   4
   2 -18  -5 362.601 64.6085   4
  -2  18   5 368.779 94.9472   1
  -2  18   4 12096.4 489.302   1
   2 -18  -4 11210.4 462.914   4
  -2 -18   3 329.706 66.8266   4
  -2  18   3 430.871 81.0316   1
   2 -18  -3 428.037 93.8352   4
  -2  18   2 13671.9 534.780   1
   2 -18  -2 13745.3 512.670   4
  -2 -18   1 27.0155 54.0131   4
   2 -18  -1 21.4955 62.0225   4
  -2  18   1-76.6156 96.2776   1
  -2 -18   1 85.7648 57.5574   2
  -2 -18   0 6926.84 343.479   4
   2 -18   0 7764.17 347.554   4
  -2 -18   0 7425.43 357.867   2
  -2 -18  -1 725.973 102.236   2
  -2 -18  -1 574.468 84.4750   4
   2 -18   1 727.537 113.313   4
  -2 -18  -2 1997.50 174.156   4
  -2 -18  -2 1529.96 153.425   2
   2  18   3 64.7738 63.9542   1
  -2 -18  -3 120.724 65.1296   2
   2  18   4 689.312 105.125   1
  -2 -18  -4 601.487 117.309   4
   2  18   5 241.949 69.3676   1
   2  18   6 3782.72 243.616   1
   2  18   7-53.8238 39.1066   1
   2  18   8 4358.21 278.796   1
  -2  19   2-68.3617 88.4282   1
  -2 -19   1 2942.51 215.126   4
  -2 -19   0 366.986 77.0218   2
  -2 -19  -1 5102.53 310.621   2
  -2 -19  -2 1712.42 179.051   2
   3   0 -25 18.4855 48.5616   3
   3   0 -24 1344.75 138.437   3
   3   0 -23 4.22255 49.7555   3
   3   0 -22 2457.44 174.158   3
   3   0 -21 50.1656 46.7812   3
   3   0 -20 10650.8 387.088   3
   3   0 -19 44.2001 31.0792   3
   3   0 -18 171.010 39.4729   3
   3   0 -17 33.7848 31.5869   3
   3   0 -16 3761.27 180.103   3
   3   0 -15 10.8014 24.8693   3
   3   0 -14 21004.3 559.862   3
   3   0 -13-9.32326 12.9333   3
   3   0 -12 36801.3 895.243   3
  -3   0  12 37434.2 896.687   2
  -3   0  12 38915.3 865.499   4
  -3   0  11 3.61450 18.1309   4
  -3   0  11 11.8068 22.9927   2
   3   0 -11 12.0751 10.8323   3
  -3   0  10 64025.1 1351.32   4
  -3   0  10 58195.9 1370.82   2
   3   0  -9 40.4614 19.1615   2
  -3   0   9 6.54389 19.5537   2
  -3   0   9 14.6522 16.3725   4
   3   0  -8 52950.7 1174.12   2
   3   0  -8 49195.9 1167.33   5
  -3   0   8 48877.0 1167.59   2
   3   0  -7 22.8052 20.6373   2
   3   0  -7 20.0685 13.3503   5
  -3   0   7 20.5709 17.0839   2
   3   0  -6 32611.6 738.241   2
  -3   0   6 30211.3 737.445   2
   3   0  -5 19.4692 18.5932   2
  -3   0   5 13.2078 14.5438   2
  -3   0   4 3470.78 117.590   2
   3   0  -4 3493.53 115.929   2
  -3   0   3-6.12245 9.39279   2
   3   0  -3 21.6872 12.6495   2
  -3   0   2 43382.6 904.523   2
   3   0  -2 41602.7 898.966   2
   3   0  -2 39424.1 895.682   3
   3   0  -2 40883.7 876.721   1
  -3   0   2 40381.7 876.554   1
   3   0  -1 1.79488 12.1285   3
  -3   0   1 13.4484 16.6387   2
   3   0  -1 21.7010 9.17858   1
  -3   0   1-15.8723 11.7395   3
   3   0  -1 4.93717 14.5714   2
   3   0   0 40175.7 950.878   3
  -3   0   0 42655.6 953.999   3
  -3   0   0 43912.7 941.978   2
   3   0   0 44083.3 941.206   2
  -3   0  -1 42.3339 15.6902   2
   3   0   1 35.9803 17.9739   3
   3   0   1 27.0058 11.4939   2
  -3   0  -1 10.5312 15.1998   3
   3   0   2 13329.8 328.197   3
  -3   0  -2 13257.0 314.482   2
  -3   0  -2 13356.0 335.123   3
  -3   0  -3 27.2382 12.7622   2
  -3   0  -3-1.79255 15.7620   3
   3   0   3 24.9114 14.5821   3
   3   0   4 52741.3 1165.05   3
  -3   0  -4 53566.5 1174.92   3
  -3   0  -5 39.3050 21.4964   3
   3   0   5 2.52411 8.73648   3
  -3   0  -6 2362.09 105.171   3
   3   0   6 2438.38 100.326   3
   3   0   7 9.15807 16.9511   3
  -3   0  -7 21.6447 21.0037   3
  -3   0  -8 23.9714 18.7241   3
  -3   0  -9-4.59251 15.5299   3
  -3   0 -10 8401.31 275.389   3
  -3   0 -11-21.5142 29.4029   3
  -3   0 -11 20.8633 9.46178   4
  -3   0 -12 21070.6 493.367   4
  -3   0 -12 19970.9 561.531   3
  -3   0 -13 45.6938 32.8730   3
  -3   0 -13 23.9726 15.0645   4
  -3   0 -14 8673.24 240.180   4
  -3   0 -14 8219.74 309.718   3
  -3   0 -15 43.6447 30.7431   3
  -3   0 -15-4.18326 10.1062   4
  -3   0 -16 1064.46 100.211   3
  -3   0 -17-0.57846 45.4020   3
  -3   0 -18 1404.10 124.615   3
  -3   0 -19 42.4252 21.2721   3
  -3   0 -20 5006.48 273.875   3
  -3   0 -21-3.40759 27.9109   3
  -3   0 -22 5766.18 315.792   3
  -3   0 -23-58.8246 36.4456   3
  -3   0 -24 9583.52 448.582   3
   3  -1 -25 3907.26 248.575   3
   3   1 -24 696.106 89.0541   3
   3  -1 -24 642.568 82.0627   3
   3   1 -23 1216.50 114.653   3
   3  -1 -23 1107.05 124.803   3
   3   1 -22 33.1567 46.9343   3
   3  -1 -22 58.4962 33.1086   3
   3  -1 -21-9.84670 43.0766   3
   3   1 -21 59.4328 32.9187   3
   3   1 -20 1021.94 98.6076   3
   3  -1 -20 816.712 87.0303   3
   3   1 -19 4591.16 215.710   3
   3  -1 -19 4087.84 216.194   3
   3   1 -18 11171.2 368.799   3
   3  -1 -18 10636.1 383.090   3
   3   1 -17 10309.9 338.904   3
   3  -1 -17 9776.08 352.389   3
   3  -1 -16 16710.4 502.070   3
   3   1 -16 17230.9 482.691   3
   3   1 -15 5451.20 212.707   3
   3  -1 -15 5704.44 231.009   3
   3   1 -14 13114.0 381.087   3
   3  -1 -14 13417.6 403.160   3
  -3  -1  14 13092.8 343.604   4
   3  -1 -13 7779.17 268.011   3
   3   1 -13 7758.78 254.825   3
  -3  -1  13 8135.23 230.562   4
  -3  -1  13 7762.06 256.732   2
  -3  -1  12 16491.6 463.287   2
   3   1 -12 17949.6 456.638   3
  -3  -1  12 17718.6 432.030   4
   3  -1 -12 17041.1 469.666   3
   3  -1 -11 2894.92 134.337   3
  -3   1  11 2996.28 117.324   4
  -3  -1  11 2644.35 125.177   2
  -3  -1  11 2936.47 111.709   4
   3   1 -11 2770.02 122.121   3
  -3  -1  10 14705.9 395.981   2
  -3   1  10 14388.7 397.537   2
  -3   1  10 15404.1 381.519   4
   3   1  -9 5641.38 175.241   2
   3  -1  -9 4964.32 175.554   5
  -3   1   9 4710.97 161.233   4
  -3   1   9 4686.46 175.141   2
  -3  -1   9 4899.38 169.099   2
   3   1  -8 716.924 52.3269   2
  -3   1   8 587.650 49.3920   2
  -3   1   8 594.810 46.4566   4
   3  -1  -8 556.023 47.1221   5
  -3  -1   8 542.973 48.9799   2
   3  -1  -8 639.168 49.0708   2
   3   1  -7 11042.2 291.381   2
  -3   1   7 11732.4 289.429   4
  -3  -1   7 9983.51 289.158   2
   3  -1  -7 11480.0 297.259   2
  -3   1   7 10290.0 293.068   2
   3   1  -6 621.805 43.7821   5
  -3   1   6 592.054 48.4862   2
   3   1  -6 606.060 43.6385   2
  -3  -1   6 666.456 48.4105   2
   3  -1  -6 639.050 48.6701   2
  -3   1   5 37922.7 844.201   2
   3   1  -5 37732.7 843.783   2
   3  -1  -5 37666.0 845.392   2
  -3  -1   5 36770.2 846.325   2
  -3  -1   4 21185.2 483.378   2
   3  -1  -4 19680.1 472.276   2
   3   1  -4 20620.2 476.516   2
  -3   1   4 19390.5 472.832   2
   3   1  -3 8894.84 229.836   3
  -3  -1   3 8882.69 203.248   1
   3  -1  -3 9261.33 235.183   2
  -3  -1   3 9543.48 246.349   2
   3   1  -3 9779.56 244.993   2
  -3   1   3 9323.94 235.956   2
   3   1  -2 10178.2 235.970   1
  -3   1   2 11487.4 258.145   1
   3  -1  -2 11325.0 265.652   2
  -3  -1   2 11058.8 279.423   2
  -3   1   2 11338.2 265.530   2
  -3  -1   2 10204.0 271.082   3
   3   1  -2 10202.7 269.522   3
   3   1  -2 10105.0 281.742   2
  -3   1   1 2086.45 74.6672   2
   3  -1  -1 2114.56 77.3584   3
  -3   1   1 2212.68 72.2947   1
   3   1  -1 1769.82 80.8756   2
   3  -1  -1 1955.44 71.5296   2
   3  -1  -1 2030.64 71.7867   1
   3   1  -1 1165.34 83.4731   3
  -3  -1   1 2095.13 87.4297   2
  -3  -1   1 2045.91 82.8532   3
  -3  -1   0 112.474 18.0729   2
  -3   1   0 116.687 17.9862   2
   3   1   0 81.4875 21.7032   3
   3   1   0 76.7239 19.4311   2
  -3   1   0 73.0329 17.4466   3
   3  -1   0 86.2616 17.4781   3
  -3  -1   0 116.938 19.6070   3
   3  -1   0 66.9991 13.3657   2
   3  -1   1 1175.26 63.9890   3
  -3  -1  -1 1266.31 56.5843   2
  -3   1  -1 1222.62 52.5545   2
  -3  -1  -1 1289.50 62.0473   3
   3  -1   1 1143.69 51.9015   2
  -3   1  -1 1233.69 63.6681   3
   3   1   1 1229.14 58.1897   3
   3   1   2 41.2551 8.47145   3
   3  -1   2 33.7375 7.63207   2
  -3  -1  -2 49.1547 13.7830   2
  -3  -1  -2 48.2352 16.1635   3
  -3   1  -2 121.247 19.7871   2
  -3   1  -2 45.4275 14.8476   3
   3  -1   2 56.8768 14.8735   3
  -3   1  -3 12789.3 303.263   2
   3   1   3 12753.6 325.209   3
  -3   1  -3 13438.9 335.207   3
   3  -1   3 13975.8 329.283   3
  -3  -1  -3 12849.2 332.271   3
   3  -1   4 6764.28 190.014   3
  -3   1  -4 6859.91 197.068   3
  -3  -1  -4 6603.33 198.823   3
  -3   1  -4 6574.90 167.736   2
   3   1   4 6544.15 192.958   3
  -3  -1  -5 56132.9 1258.08   3
   3  -1   5 55039.5 1239.36   3
   3   1   5 57002.0 1250.00   3
  -3   1  -5 54145.8 1248.20   3
   3  -1   6 18592.9 443.709   3
   3   1   6 18430.9 450.239   3
  -3   1  -6 18114.3 451.249   3
  -3  -1  -6 17119.3 454.608   3
  -3   1  -7 26387.2 622.996   3
   3  -1   7 26221.9 608.142   3
  -3  -1  -7 24692.0 625.049   3
  -3  -1  -8 9771.18 300.206   3
   3  -1   8 10327.6 285.951   3
  -3   1  -8 10305.0 296.486   3
  -3  -1  -9 14480.2 407.819   3
  -3   1  -9 14726.0 401.420   3
  -3   1 -10 4782.49 146.949   2
  -3   1 -10 4417.15 177.678   3
  -3  -1 -10 4221.25 180.085   3
  -3   1 -10 4354.97 127.882   4
  -3   1 -11 6347.23 230.025   3
  -3   1 -11 6433.36 194.387   2
  -3  -1 -11 5907.06 232.202   3
  -3   1 -11 6232.07 168.763   4
  -3  -1 -12 370.771 35.8044   4
  -3   1 -12 318.038 38.8133   2
  -3   1 -12 373.626 54.8900   3
  -3   1 -12 407.776 30.8938   4
  -3  -1 -12 351.913 48.9473   3
  -3   1 -13 34.1884 7.34505   4
  -3   1 -13 37.0228 32.6389   3
  -3  -1 -13 51.4463 34.7423   3
  -3  -1 -13 36.9318 12.8213   4
  -3   1 -13 42.2895 13.4479   2
  -3  -1 -14 2836.15 164.442   3
  -3  -1 -14 2944.27 120.691   4
  -3   1 -14 2986.52 162.974   3
  -3  -1 -15 3957.03 204.595   3
  -3  -1 -15 4041.24 150.471   4
  -3   1 -15 3584.31 191.364   3
  -3  -1 -16 8185.63 334.053   3
  -3   1 -16 8405.86 325.761   3
  -3  -1 -16 8773.30 260.871   4
  -3   1 -17 5145.25 246.699   3
  -3  -1 -17 5089.19 254.858   3
  -3  -1 -18 5095.43 268.801   3
  -3   1 -18 5525.98 265.896   3
  -3   1 -19 9891.91 388.769   3
  -3  -1 -19 9288.76 395.722   3
  -3   1 -20 8923.28 376.954   3
  -3  -1 -20 8467.58 385.359   3
  -3  -1 -21 6284.05 329.929   3
  -3   1 -21 6577.39 323.607   3
  -3   1 -22 3258.97 227.600   3
  -3  -1 -22 2923.65 225.168   3
  -3   1 -23 476.121 98.6401   3
  -3  -1 -23 514.594 98.6361   3
  -3  -1 -24 215.932 68.0949   3
   3  -2 -25 1223.22 138.531   3
   3  -2 -24 273.781 75.9168   3
   3  -2 -23 4756.87 272.337   3
   3   2 -22 286.724 63.5677   3
   3  -2 -22 291.735 64.7166   3
   3   2 -21 12900.3 426.316   3
   3  -2 -21 11461.3 446.990   3
   3   2 -20 1213.44 107.648   3
   3  -2 -20 1060.67 115.061   3
   3  -2 -19 4722.48 239.862   3
   3   2 -19 4990.39 218.753   3
   3  -2 -18 121.106 41.0264   3
   3   2 -18 104.276 37.3807   3
   3  -2 -17 181.708 39.0728   3
   3   2 -17 176.277 35.6419   3
   3  -2 -16 275.665 47.1550   3
   3   2 -16 293.401 42.9631   3
   3   2 -15 3764.29 163.198   3
   3  -2 -15 3771.41 186.314   3
  -3  -2  15 3884.22 137.521   4
  -3  -2  14 1441.84 91.8352   2
   3  -2 -14 1347.13 103.338   3
  -3  -2  14 1513.07 73.2264   4
   3   2 -14 1430.62 88.4351   3
  -3  -2  13 11993.6 353.858   2
   3  -2 -13 11672.5 375.936   3
   3   2 -13 12086.2 346.967   3
  -3  -2  13 13206.4 325.265   4
   3   2 -12 57.4919 26.3554   3
  -3  -2  12 65.7340 24.6229   2
   3  -2 -12 50.9740 25.5056   3
  -3  -2  12 59.9609 10.9202   4
   3  -2 -11 44992.8 1042.63   3
   3   2 -11 45035.2 1003.67   3
  -3  -2  11 42851.5 1014.83   2
   3  -2 -10 4822.41 179.027   5
   3   2 -10 5085.00 175.209   2
  -3  -2  10 4718.54 168.981   2
  -3  -2   9 45966.6 1136.14   2
   3  -2  -9 47330.6 1147.42   5
  -3   2   9 49974.6 1134.03   4
  -3   2   8 1107.39 63.8300   4
   3   2  -8 1124.33 67.4235   2
  -3   2   8 970.584 67.1954   2
  -3  -2   8 1002.70 67.2803   2
   3   2  -7 27056.5 620.827   2
  -3   2   7 26118.6 610.534   4
  -3   2   7 26566.2 623.147   2
  -3  -2   7 24745.0 613.398   2
   3  -2  -7 26568.3 619.971   2
  -3   2   6 219.874 34.1317   4
  -3  -2   6 357.634 35.9860   2
  -3   2   6 361.141 39.1504   2
   3   2  -6 356.669 36.3673   2
   3  -2  -6 377.919 37.8280   2
  -3  -2   5 8420.54 239.075   2
   3   2  -5 8756.06 242.169   2
  -3   2   5 8054.91 233.118   2
  -3   2   5 8983.31 235.184   4
   3  -2  -5 8642.66 235.998   2
  -3   2   4 1121.05 59.5338   2
  -3  -2   4 1285.00 68.2156   2
   3  -2  -4 1381.08 63.4252   2
   3   2  -4 804.925 49.3987   3
   3   2  -4 1256.31 65.3024   2
   3   2  -4 1217.20 52.4132   5
  -3  -2   3 1747.63 84.8253   2
   3  -2  -3 1864.95 73.6683   2
  -3   2   3 1883.68 75.7290   2
   3   2  -3 1683.74 72.2375   3
   3   2  -3 1807.02 87.9032   2
   3   2  -2 9.23580 16.8439   2
   3  -2  -2-6.29625 10.2270   2
  -3   2   2 25.0394 17.6899   1
  -3  -2   2 21.7994 20.7747   2
  -3   2   2 14.4485 8.73359   2
  -3  -2   2-5.46775 14.6953   3
   3   2  -2 39.2356 13.2734   3
  -3  -2   1 76298.0 1599.52   2
  -3   2   1 72620.1 1582.76   1
   3  -2  -1 76764.3 1583.55   1
   3   2  -1 75114.9 1594.22   2
   3  -2  -1 72913.7 1583.37   3
  -3   2   1 72203.7 1572.19   2
   3   2  -1 69058.3 1587.05   3
  -3  -2   1 75348.9 1596.45   3
   3  -2  -1 74614.8 1573.46   2
  -3  -2   0 23003.1 515.441   2
   3  -2   0 20278.6 488.992   2
   3   2   0 22064.1 507.938   3
   3  -2   0 23200.5 508.246   3
  -3  -2   0 22298.4 513.681   3
   3  -2   0 22651.2 510.095   1
  -3   2   0 21952.2 489.838   2
  -3  -2  -1 18733.4 435.037   2
   3  -2   1 17929.6 408.994   2
   3  -2   1 19202.0 441.542   3
  -3   2  -1 18998.8 440.795   3
  -3   2  -1 17971.7 408.264   2
   3   2   1 17403.3 429.520   3
  -3  -2  -1 18793.7 436.007   3
  -3  -2  -2 1695.19 75.6000   3
  -3   2  -2 1536.41 53.4252   2
   3   2   2 1554.42 69.8257   3
   3  -2   2 1478.27 74.7473   3
  -3   2  -2 1651.00 77.9359   3
   3  -2   2 1638.86 55.3322   2
  -3   2  -3 24592.3 572.338   2
   3  -2   3 26482.2 606.047   3
   3   2   3 26151.2 608.318   3
  -3  -2  -3 26544.7 616.233   3
  -3   2  -3 26940.3 620.587   3
   3   2   4 1366.34 71.1587   3
   3  -2   4 1455.46 67.8186   3
  -3   2  -4 1409.82 72.4870   3
  -3   2  -4 1428.72 49.2901   2
  -3  -2  -4 1399.26 74.0329   3
  -3   2  -5 33874.5 760.089   2
   3   2   5 36524.6 812.038   3
  -3  -2  -5 34969.1 817.641   3
   3  -2   5 35161.9 797.866   3
  -3   2  -5 36988.1 812.203   3
   3  -2   6 2462.86 98.3409   3
  -3  -2  -6 2393.43 109.582   3
  -3   2  -6 2472.70 104.118   3
  -3   2  -7 18.1830 13.0519   3
   3  -2   7 43.8331 16.4484   3
  -3  -2  -7-3.60333 15.9748   3
  -3  -2  -8 14119.0 388.832   3
   3  -2   8 14706.6 361.836   3
  -3   2  -8 13184.9 320.268   2
  -3   2  -8 14382.9 374.338   3
  -3  -2  -9 1835.80 106.158   3
  -3   2  -9 1745.77 57.6463   4
  -3   2  -9 1905.30 101.249   3
  -3   2  -9 2160.02 72.4893   2
  -3   2 -10 1890.20 103.299   3
  -3   2 -10 1514.18 53.3781   4
  -3   2 -10 1950.88 71.7666   2
  -3  -2 -10 1904.57 113.317   3
  -3   2 -11 15604.8 437.890   3
  -3  -2 -11 14509.3 449.193   3
  -3   2 -11 16281.9 380.279   2
  -3  -2 -12 814.481 63.7819   4
  -3  -2 -12 890.919 83.9850   3
  -3   2 -12 871.776 76.9550   3
  -3   2 -12 871.643 51.1059   2
  -3  -2 -13 9921.44 356.022   3
  -3   2 -13 10805.2 283.760   2
  -3  -2 -13 10813.7 309.764   4
  -3   2 -13 10117.0 338.606   3
  -3  -2 -14 5853.34 202.276   4
  -3   2 -14 5620.56 233.776   3
  -3  -2 -14 5502.00 248.268   3
  -3   2 -15 4035.80 196.398   3
  -3  -2 -15 3642.81 202.138   3
  -3  -2 -15 3914.40 159.192   4
  -3  -2 -16 512.659 54.1417   4
  -3   2 -16 514.820 74.8012   3
  -3  -2 -16 531.412 73.7219   3
  -3   2 -17 96.4985 42.0099   3
  -3  -2 -17 52.4213 20.0439   4
  -3  -2 -17 21.8342 28.3670   3
  -3  -2 -18 94.0330 37.7833   3
  -3   2 -18 83.2515 44.3757   3
  -3   2 -19 851.433 104.653   3
  -3  -2 -19 689.483 90.1898   3
  -3   2 -20 232.359 73.0757   3
  -3  -2 -20 144.284 50.8817   3
  -3  -2 -21 6695.96 355.656   3
  -3   2 -21 7597.36 338.411   3
  -3  -2 -22 574.843 99.0205   3
  -3  -2 -23 11919.8 517.476   3
   3  -3 -25 3622.29 255.981   3
   3  -3 -24 1340.36 150.501   3
   3  -3 -23 152.034 27.3321   3
   3  -3 -22-52.0881 32.9198   3
   3   3 -21 102.142 43.6683   3
   3  -3 -21 2.12608 24.4269   3
   3   3 -20 1708.70 122.777   3
   3  -3 -20 1316.59 127.980   3
   3   3 -19 2506.16 141.981   3
   3  -3 -19 2294.71 166.228   3
   3   3 -18 12150.2 373.300   3
   3  -3 -18 11117.5 413.925   3
   3   3 -17 5566.89 212.796   3
   3  -3 -17 5039.26 244.007   3
   3   3 -16 15901.7 441.023   3
   3  -3 -16 15798.8 495.525   3
   3   3 -15 18216.0 482.964   3
   3  -3 -15 17249.0 533.585   3
  -3  -3  15 18494.9 444.575   4
  -3  -3  15 18740.5 495.838   2
   3  -3 -14 19303.1 576.189   3
  -3  -3  14 22009.3 495.706   4
   3   3 -14 19511.7 521.591   3
  -3  -3  14 20810.9 539.873   2
   3   3 -13 4176.81 157.002   3
  -3  -3  13 4050.34 168.281   2
  -3  -3  13 4617.87 143.629   4
   3  -3 -13 4089.71 189.836   3
   3   3 -12 5216.88 174.240   3
  -3  -3  12 5175.84 187.123   2
   3  -3 -12 5111.40 207.955   3
   3  -3 -11 2757.56 138.421   3
   3   3 -11 2681.15 108.075   3
  -3  -3  11 2704.49 119.377   2
   3  -3 -11 2589.84 127.389   5
   3   3 -10 366.976 45.7201   2
  -3  -3  10 351.075 39.7018   2
   3  -3 -10 384.390 47.2230   5
   3   3  -9 669.950 55.4024   2
  -3  -3   9 523.353 49.7590   2
  -3  -3   8 28403.0 701.489   2
   3   3  -8 32190.7 720.937   2
  -3   3   7 15.7681 19.0243   4
   3   3  -7 57.3812 24.5408   2
   3  -3  -7 32.3703 22.7794   2
  -3  -3   7 40.8450 14.9297   2
  -3   3   6 25681.6 602.007   4
  -3  -3   6 24532.8 610.173   2
   3  -3  -6 26816.7 610.909   2
   3   3  -6 25946.2 624.748   2
  -3  -3   5 21068.7 503.284   2
   3   3  -5 19211.6 460.330   3
  -3   3   5 19046.9 484.363   4
   3   3  -5 21564.5 508.287   2
   3  -3  -5 22206.3 493.589   2
  -3   3   4 30374.8 682.393   2
  -3  -3   4 29137.3 700.145   2
  -3   3   4 31304.4 683.802   4
   3  -3  -4 29495.7 681.715   2
   3   3  -4 28975.1 667.533   3
   3   3  -4 29833.3 695.125   2
   3   3  -3 1027.82 63.8312   2
   3  -3  -3 1168.01 57.2748   2
   3   3  -3 889.012 54.0392   3
  -3   3   3 1085.30 58.3400   4
  -3  -3   3 902.887 53.0392   3
  -3  -3   3 1162.02 72.6738   2
  -3   3   3 1231.40 57.8050   2
  -3   3   2 36764.7 782.610   2
  -3  -3   2 33886.8 804.915   2
  -3   3   2 36111.5 795.384   1
   3   3  -2 35680.2 797.500   2
  -3   3   2 37939.5 788.297   4
   3   3  -2 33554.3 777.063   3
  -3  -3   2 34206.7 788.033   3
   3  -3  -2 34831.1 779.939   2
   3   3  -1 5677.94 161.742   3
  -3  -3   1 5981.45 177.165   2
  -3   3   1 6046.99 164.862   4
  -3   3   1 5766.18 172.049   1
  -3   3   1 6165.52 159.065   2
   3   3  -1 5468.48 136.124   5
   3  -3  -1 5901.50 157.454   2
  -3  -3   1 6166.12 169.634   3
   3  -3   0 26516.3 619.747   1
  -3  -3   0 26150.9 621.197   2
   3   3   0 25629.2 608.033   3
  -3   3   0 27515.2 622.884   1
   3  -3   0 27777.9 595.991   2
  -3  -3   0 28362.5 618.590   3
  -3   3   0 27482.3 596.360   2
   3  -3   0 27371.0 611.779   3
   3  -3   1 32986.9 711.310   2
   3   3   1 32912.9 734.923   3
  -3  -3  -1 32653.3 742.759   3
  -3   3  -1 33623.2 710.498   2
   3  -3   1 32821.6 736.325   3
   3  -3   1 32572.6 746.273   1
  -3  -3  -2 4128.88 138.352   3
   3  -3   2 4078.95 105.305   2
   3   3   2 4300.88 134.703   3
  -3   3  -2 4099.28 134.547   3
   3  -3   2 4286.21 138.071   3
  -3   3  -2 4087.79 104.321   2
   3   3   3 12081.3 304.047   3
  -3   3  -3 11521.5 305.433   3
  -3  -3  -3 11315.8 307.843   3
   3  -3   3 11786.3 301.145   3
   3  -3   4 18753.0 442.461   3
  -3  -3  -4 17609.2 458.389   3
   3   3   4 18853.9 454.608   3
  -3   3  -4 18964.0 461.088   3
  -3  -3  -5 4480.11 161.741   3
  -3   3  -5 4415.97 153.003   3
   3   3   5 4703.99 159.574   3
   3  -3   5 4697.25 144.297   3
  -3  -3  -6 56820.4 1305.40   3
   3  -3   6 58337.0 1271.61   3
  -3   3  -6 56652.2 1287.47   3
   3  -3   7 6129.79 182.766   3
  -3  -3  -7 5818.24 208.502   3
  -3   3  -7 6206.57 195.427   3
  -3   3  -8 7316.58 170.538   2
  -3   3  -8 8286.81 234.092   3
   3  -3   8 8142.28 218.577   3
  -3   3  -8 6824.83 168.703   2
  -3  -3  -8 7514.43 248.345   3
  -3  -3  -9 7523.05 263.052   3
   3  -3   9 8026.00 229.028   3
  -3   3  -9 7971.49 243.438   3
  -3   3  -9 7578.92 184.207   2
  -3  -3 -10 4467.77 191.888   3
  -3   3 -10 4284.90 121.266   2
  -3   3 -10 4667.07 172.947   3
  -3  -3 -11 81.6432 33.4757   3
  -3   3 -11 91.8126 14.3652   2
  -3   3 -11 73.8905 20.4749   3
  -3  -3 -12 2293.20 141.903   3
  -3   3 -12 2413.17 127.694   3
  -3  -3 -12 2385.58 121.659   4
  -3   3 -12 2413.18 85.6506   2
  -3  -3 -13 1016.12 77.4367   4
  -3   3 -13 970.171 53.0704   2
  -3  -3 -13 1002.46 95.2178   3
  -3   3 -13 908.309 78.2400   3
  -3  -3 -14 1951.76 136.943   3
  -3  -3 -14 2053.68 115.602   4
  -3   3 -14 1916.57 122.586   3
  -3  -3 -15 2626.72 134.180   4
  -3   3 -15 2513.75 146.870   3
  -3  -3 -15 2634.15 171.994   3
  -3  -3 -16 14274.5 499.664   3
  -3  -3 -16 15638.3 433.332   4
  -3   3 -16 14570.7 459.895   3
  -3  -3 -17 6464.05 238.120   4
  -3  -3 -17 5953.06 294.989   3
  -3   3 -17 6238.96 266.677   3
  -3  -3 -18 12400.6 479.712   3
  -3  -3 -18 13066.0 394.670   4
  -3   3 -18 13197.5 442.341   3
  -3  -3 -19 6421.61 326.548   3
  -3   3 -19 6684.12 291.951   3
  -3  -3 -20 6713.00 350.088   3
  -3   3 -20 7624.70 323.798   3
  -3  -3 -21 3759.88 260.428   3
  -3  -3 -22 2681.30 218.808   3
  -3  -3 -23 2719.80 230.368   3
   3  -4 -24 2856.72 230.001   3
   3  -4 -23 2801.31 213.439   3
   3  -4 -22 10659.0 447.650   3
   3  -4 -21 3071.11 211.507   3
   3   4 -20 5917.51 237.618   3
   3  -4 -20 5311.41 284.049   3
   3   4 -19 4107.73 184.556   3
   3  -4 -19 3789.16 226.382   3
   3  -4 -18 1316.40 129.155   3
   3   4 -18 1523.45 99.7161   3
   3   4 -17 2861.03 138.239   3
   3  -4 -17 2806.76 178.893   3
  -3  -4  16 229.737 34.5468   2
   3   4 -16 202.195 34.6059   3
   3  -4 -16 132.006 34.0693   3
   3   4 -15 203.082 31.6948   3
   3  -4 -15 198.448 47.8586   3
  -3  -4  15 216.276 44.7393   2
   3  -4 -14 2423.76 149.695   3
  -3  -4  14 2726.36 98.2775   4
  -3  -4  14 2664.24 129.759   2
   3   4 -14 2619.47 116.397   3
   3  -4 -13 37.3730 25.2527   3
   3   4 -13 48.8509 19.7823   3
  -3  -4  13 42.4601 24.7896   2
  -3  -4  12 15198.3 411.803   2
   3  -4 -12 15169.8 452.219   3
   3   4 -12 15664.3 389.089   3
   3  -4 -12 15613.9 436.040   5
   3  -4 -11 1529.39 94.7493   5
   3   4 -11 1621.86 74.6441   3
   3  -4 -11 1706.15 109.268   3
  -3  -4  11 1534.67 87.2321   2
   3   4 -10 30972.9 710.731   3
   3   4 -10 33763.0 779.499   2
  -3  -4  10 31086.0 744.599   2
  -3  -4   9 6449.85 208.796   2
   3   4  -9 6976.39 232.725   2
  -3  -4   8 24085.3 592.458   2
   3   4  -8 24977.2 614.544   2
  -3  -4   7 10996.4 268.768   5
  -3  -4   7 9937.51 281.851   2
   3   4  -7 10134.9 291.932   2
   3   4  -7 8851.70 240.337   3
   3   4  -6 6840.08 179.479   3
  -3   4   6 6238.11 206.806   4
  -3  -4   6 7296.25 221.001   2
   3  -4  -6 6558.15 214.767   2
   3   4  -6 6976.34 216.951   2
  -3  -4   6 7046.40 194.425   5
   3   4  -5 47.8454 17.1072   2
  -3  -4   5 36.4966 9.11455   1
  -3   4   5 131.543 20.9611   4
  -3  -4   5 31.1512 12.6149   5
   3   4  -5 30.1294 12.9550   3
   3  -4  -5 60.6126 20.8134   2
  -3  -4   5 59.8483 21.0744   2
  -3  -4   4 11176.2 319.954   2
   3   4  -4 10891.4 277.487   3
   3   4  -4 12335.7 311.838   2
  -3  -4   4 10952.3 274.839   5
  -3   4   4 11320.0 297.194   4
   3  -4  -4 12251.2 299.908   2
   3  -4  -3 695.052 46.1581   2
   3   4  -3 549.849 26.1353   1
   3   4  -3 769.301 51.1573   2
  -3  -4   3 587.179 40.9466   3
  -3   4   3 546.212 43.5709   4
  -3  -4   3 627.867 49.5572   2
   3   4  -3 586.750 35.0338   3
  -3   4   2 11126.3 276.009   4
   3   4  -2 10105.6 258.886   3
  -3  -4   2 10286.2 288.696   2
  -3   4   2 10773.2 289.310   1
  -3  -4   2 10426.9 272.782   3
   3  -4  -2 11084.6 270.180   2
  -3  -4   1 116.685 17.0183   3
   3  -4  -1 54.9481 11.9497   2
  -3   4   1 85.3707 20.3186   1
  -3   4   1 96.9907 23.1122   4
  -3  -4   1 148.539 22.7861   2
   3   4  -1 86.0496 15.7157   3
   3  -4   0 68186.7 1460.43   2
   3   4   0 66578.8 1472.22   3
  -3  -4   0 69063.6 1481.63   3
   3  -4   0 69872.2 1493.71   1
  -3  -4   0 66508.5 1496.00   2
  -3   4   0 67509.7 1496.70   1
  -3   4   0 70670.8 1474.65   4
  -3  -4  -1 1105.21 62.1398   3
   3   4   1 1235.92 58.9852   3
  -3   4  -1 1126.59 55.5285   4
   3  -4   1 1230.35 65.0837   1
   3  -4   1 1099.26 55.9521   3
   3  -4   1 1120.84 46.3306   2
  -3  -4  -2 58537.4 1328.94   3
   3   4   2 61698.7 1321.72   3
  -3   4  -2 60509.3 1299.72   4
   3  -4   2 62536.7 1284.60   2
   3  -4   2 60344.8 1321.96   3
   3  -4   2 60170.9 1336.15   1
   3  -4   3 2124.77 86.3047   3
   3  -4   3 2056.56 94.6118   1
  -3   4  -3 2318.10 87.1533   3
  -3   4  -3 2262.08 69.7330   4
   3   4   3 2278.52 90.4602   3
   3  -4   3 1366.89 47.8414   2
  -3  -4  -3 2160.87 93.0363   3
   3  -4   4 32313.8 694.040   3
  -3   4  -4 32285.0 704.159   3
  -3  -4  -4 32668.5 721.439   3
  -3   4  -4 32801.8 664.823   4
   3   4   4 34065.5 715.151   3
   3  -4   5 70.4393 15.7973   3
  -3  -4  -5 45.6585 21.2969   3
  -3   4  -5 60.3814 10.4755   4
   3   4   5 57.7983 9.20704   5
  -3   4  -5 43.2741 16.6114   3
   3  -4   6 3757.84 119.333   3
   3   4   6 3138.34 98.8518   5
  -3   4  -6 3838.19 139.646   3
  -3  -4  -6 3612.91 146.797   3
  -3  -4  -7 1114.70 79.9375   3
   3  -4   7 1114.14 59.3416   3
   3   4   7 932.531 46.5958   5
  -3   4  -7 1144.02 69.9442   3
  -3  -4  -8 2230.84 120.740   3
   3  -4   8 2383.88 94.6829   3
   3   4   8 2064.80 81.1809   5
  -3   4  -8 2274.51 104.026   3
  -3  -4  -9 5654.11 218.593   3
   3   4   9 5161.25 160.090   5
   3  -4   9 5645.50 174.347   3
  -3   4  -9 5608.87 190.508   3
  -3  -4 -10 12904.9 397.385   3
   3  -4  10 12921.2 338.512   3
  -3   4 -10 12673.2 357.245   3
  -3  -4 -11 4080.58 191.354   3
  -3   4 -11 3783.08 158.583   3
  -3   4 -12 12986.0 380.087   3
  -3  -4 -12 13587.7 431.156   3
  -3  -4 -13 13140.2 434.010   3
  -3  -4 -13 13081.9 389.700   4
  -3   4 -13 12583.6 379.444   3
  -3  -4 -14 12368.8 372.260   4
  -3  -4 -14 11725.4 419.632   3
  -3   4 -14 11594.1 365.827   3
  -3   4 -15 8868.42 312.622   3
  -3  -4 -15 9373.40 368.715   3
  -3  -4 -15 9539.00 315.554   4
  -3  -4 -16 9471.80 319.838   4
  -3  -4 -16 9283.51 377.992   3
  -3   4 -16 9316.22 327.316   3
  -3  -4 -17 689.089 100.706   3
  -3   4 -17 587.097 76.4006   3
  -3  -4 -17 766.257 75.9718   4
  -3  -4 -18 262.663 79.9401   3
  -3   4 -18 212.969 48.7427   3
  -3  -4 -18 331.783 53.9218   4
  -3  -4 -19 429.913 87.8370   3
  -3   4 -19 568.142 71.7177   3
  -3  -4 -20 2539.54 210.154   3
  -3  -4 -21-16.0400 57.0480   3
  -3  -4 -22 4057.15 283.389   3
   3  -5 -24 127.450 71.3581   3
   3  -5 -23 507.272 95.1769   3
   3  -5 -22 1058.35 126.311   3
   3  -5 -21 33.2714 31.9840   3
   3  -5 -20 387.967 78.9900   3
   3  -5 -19 5699.78 289.410   3
   3   5 -18 1472.01 93.2726   3
   3  -5 -18 1378.81 129.646   3
   3   5 -17 7580.79 244.900   3
   3  -5 -17 6831.05 307.316   3
   3   5 -16 4855.59 173.367   3
  -3  -5  16 4512.54 184.057   2
   3  -5 -16 4164.07 225.240   3
   3  -5 -15 21124.5 647.534   3
   3   5 -15 23428.0 560.617   3
  -3  -5  15 23082.6 588.427   2
  -3  -5  14 7067.09 186.816   4
   3  -5 -14 5880.02 259.214   3
   3   5 -14 6176.62 196.891   3
  -3  -5  14 6169.40 221.141   2
   3  -5 -13 7374.87 292.050   3
  -3  -5  13 7926.82 252.055   2
   3   5 -13 8231.38 226.716   3
   3   5 -12 3582.46 120.658   3
   3  -5 -12 3509.97 176.589   3
  -3  -5  12 3538.94 146.731   2
   3  -5 -12 3442.97 158.775   5
   3  -5 -11 196.339 37.0774   3
  -3  -5  11 203.826 35.9190   2
   3   5 -11 199.354 25.1613   3
   3   5 -10 15.2168 18.6388   2
   3   5 -10 46.6348 14.5289   3
   3  -5 -10 28.5906 33.7403   3
  -3  -5  10 57.0593 22.1865   2
  -3  -5   9 10319.5 297.944   2
   3   5  -9 10094.9 252.081   3
   3   5  -9 10132.9 248.701   3
   3   5  -9 11191.1 318.138   2
  -3  -5   8 86.6256 21.7545   2
   3   5  -8 117.625 25.2816   2
   3   5  -8 85.0153 12.4301   3
   3  -5  -8 85.6890 24.2759   4
   3  -5  -7 27099.2 669.135   4
   3   5  -7 30743.5 678.379   2
  -3  -5   7 28779.3 679.860   2
  -3  -5   7 30406.1 651.922   5
  -3  -5   7 27267.0 617.421   1
   3   5  -7 25845.6 619.767   3
  -3  -5   6 3461.75 99.7560   1
   3   5  -6 3815.07 142.041   2
  -3  -5   6 3258.11 140.480   2
   3   5  -6 3281.68 101.494   3
  -3  -5   6 3539.41 119.621   5
   3  -5  -6 3159.66 130.817   4
   3  -5  -5 47166.5 1164.71   4
  -3  -5   5 49383.1 1191.86   2
  -3  -5   5 50727.3 1142.49   5
   3   5  -5 48106.0 1120.21   3
   3   5  -4 827.741 38.4076   3
  -3  -5   4 801.901 44.1513   5
  -3  -5   4 786.400 41.9370   3
   3  -5  -4 760.961 58.8879   2
  -3   5   4 865.753 57.7949   4
  -3  -5   4 833.318 64.7880   2
   3  -5  -4 881.433 59.1151   4
   3   5  -3 33551.6 819.463   3
  -3  -5   3 37301.8 872.866   2
  -3   5   3 37030.4 856.174   4
  -3  -5   3 37632.4 821.856   5
   3   5  -3 39299.8 818.531   1
   3  -5  -3 39335.3 857.362   2
  -3  -5   3 36778.7 839.794   3
   3  -5  -3 37990.2 855.237   4
   3   5  -2 277.339 24.5459   3
   3  -5  -2 285.923 31.7955   4
  -3   5   2 333.097 40.4191   1
  -3  -5   2 322.827 39.6637   2
  -3  -5   2 347.394 29.9572   3
   3  -5  -2 386.064 36.1115   2
  -3   5   2 227.646 35.1008   4
   3   5  -1 44710.0 1002.08   3
  -3  -5   1 46382.9 1012.97   3
  -3  -5   1 45046.9 1036.16   2
  -3   5   1 45801.9 1015.39   4
  -3   5   1 46231.9 1042.41   1
   3  -5  -1 45840.1 1007.65   2
  -3   5   0 76.9554 26.8809   1
   3  -5   0 100.888 17.1262   2
  -3   5   0 82.9466 23.3078   4
   3   5   0 107.478 20.2770   3
  -3  -5   0 77.0746 18.3378   3
   3  -5   1 6777.82 192.422   3
   3  -5   1 6752.31 215.025   1
   3   5   1 6993.98 195.725   3
  -3   5  -1 6825.19 216.918   1
  -3   5  -1 6915.35 189.369   4
  -3  -5  -1 7009.92 206.082   3
   3  -5   1 6825.47 177.279   2
  -3  -5  -2 7871.20 227.193   3
   3  -5   2 7364.26 209.761   3
   3   5   2 7917.03 218.210   3
   3  -5   2 7258.90 231.487   1
   3  -5   2 7475.47 185.826   2
  -3   5  -2 7685.71 201.596   4
  -3  -5  -3 4136.07 149.893   3
   3  -5   3 3707.41 151.046   1
   3   5   3 4308.23 144.014   3
   3  -5   3 4185.49 135.998   3
   3  -5   3 3766.27 102.741   2
  -3   5  -3 4089.34 119.489   4
   3  -5   4 11593.7 295.998   3
  -3  -5  -4 11145.0 319.452   3
   3  -5   5 14746.1 363.188   3
  -3  -5  -5 14410.7 400.298   3
  -3   5  -5 15308.9 375.201   3
   3  -5   6 11806.8 294.116   3
  -3  -5  -6 11322.4 338.201   3
  -3   5  -6 11562.2 311.012   3
  -3   5  -7 17439.2 439.498   3
   3  -5   7 17528.9 415.277   3
  -3  -5  -7 16500.2 467.757   3
  -3  -5  -8 3919.17 175.192   3
   3  -5   8 4015.71 133.094   3
  -3   5  -8 4285.21 156.974   3
  -3  -5  -9 13246.1 401.647   3
   3  -5   9 13154.7 334.911   3
  -3   5  -9 13123.3 360.913   3
  -3  -5 -10 2318.84 141.292   3
   3  -5  10 2338.45 97.2452   3
  -3   5 -10 2262.98 109.977   3
  -3  -5 -11 2035.63 132.834   3
   3  -5  11 2006.25 94.0431   3
  -3   5 -11 1869.62 103.036   3
  -3  -5 -12 645.227 77.4895   3
  -3   5 -12 731.000 63.5884   3
  -3  -5 -13 612.916 71.7756   4
  -3  -5 -13 487.576 73.9989   3
  -3   5 -13 575.793 61.5905   3
  -3  -5 -14 456.909 70.7001   3
  -3   5 -14 506.509 56.7750   3
  -3  -5 -14 538.348 68.2345   4
  -3  -5 -15 5151.24 262.489   3
  -3  -5 -15 5455.52 228.921   4
  -3   5 -15 4988.19 211.979   3
  -3   5 -16 2472.95 143.689   3
  -3  -5 -16 2275.29 143.077   4
  -3  -5 -16 2484.18 185.662   3
  -3  -5 -17 12336.5 475.968   3
  -3   5 -17 12049.4 399.435   3
  -3  -5 -17 12679.0 409.944   4
  -3  -5 -18 4514.11 215.138   4
  -3  -5 -18 4167.33 258.104   3
  -3  -5 -19 10245.3 454.182   3
  -3  -5 -19 11192.7 385.227   4
  -3  -5 -20 1956.67 182.231   3
  -3  -5 -21 3809.13 273.768   3
  -3  -5 -22 464.259 116.189   3
   3  -6 -23 7918.11 404.993   3
   3  -6 -22 5677.26 329.007   3
   3  -6 -21 8040.72 384.809   3
   3  -6 -20 7853.16 364.991   3
   3  -6 -19 3851.01 240.607   3
   3  -6 -18 5640.73 283.802   3
  -3  -6  17 2848.85 139.495   2
   3  -6 -17 2524.93 176.160   3
   3   6 -16 690.071 49.8125   3
   3  -6 -16 764.430 95.3863   3
  -3  -6  16 707.031 65.5805   2
   3  -6 -15 1031.73 100.602   3
   3   6 -15 1099.82 60.4731   3
  -3  -6  15 925.002 75.4393   2
  -3  -6  14 371.229 54.0682   2
   3   6 -14 373.218 32.6141   3
   3  -6 -14 296.124 60.3836   3
   3   6 -13 11394.2 278.897   3
   3  -6 -13 10458.7 372.307   3
   3  -6 -13 10753.4 346.721   5
  -3  -6  13 10595.2 317.044   2
   3  -6 -12 3437.28 158.571   5
   3   6 -12 3390.32 106.263   3
   3  -6 -12 3435.47 175.643   3
  -3  -6  12 3302.49 140.099   2
   3   6 -11 15619.7 364.269   3
   3  -6 -11 16164.8 467.955   3
  -3  -6  11 16355.1 424.125   2
   3   6 -11 15814.8 370.222   3
  -3  -6  10 2322.72 111.655   2
   3   6 -10 2233.45 69.7388   3
   3  -6 -10 2273.95 129.663   3
   3  -6 -10 2196.42 122.187   4
   3   6 -10 2058.40 74.1754   3
  -3  -6   9 24180.6 478.052   1
   3   6  -9 26425.6 537.135   2
  -3  -6   9 22831.8 520.937   2
   3   6  -9 18830.6 431.733   3
   3  -6  -9 23605.9 553.256   3
   3   6  -9 15319.0 440.957   3
   3  -6  -9 21847.3 533.041   4
   3  -6  -8 6600.09 209.396   4
  -3  -6   8 7123.95 208.424   2
  -3  -6   8 7317.02 163.271   1
   3   6  -8 7630.37 212.614   2
  -3  -6   7 4346.60 119.240   1
  -3  -6   7 4005.51 158.236   2
   3  -6  -7 3879.19 153.628   4
   3   6  -7 4835.64 157.718   2
   3   6  -7 3096.97 93.7782   3
   3  -6  -6 9030.05 265.107   4
  -3  -6   6 9361.27 280.205   2
   3   6  -6 8167.35 196.683   3
   3  -6  -5 2534.59 112.784   4
   3   6  -5 2399.28 72.8435   3
  -3  -6   5 2642.49 127.306   2
   3   6  -4 232.973 19.9247   3
   3  -6  -4 224.321 34.9412   4
  -3  -6   4 248.076 36.9255   2
  -3  -6   4 225.934 23.8259   3
  -3  -6   3 2167.29 107.034   2
   3   6  -3 2188.17 80.0553   1
   3  -6  -3 1974.51 94.9895   4
   3  -6  -3 2439.65 103.146   2
  -3  -6   3 2338.03 89.6396   3
   3   6  -3 2045.78 73.2447   3
   3   6  -2 202.102 20.2415   3
  -3   6   2 118.778 29.1758   1
   3  -6  -2 207.011 29.8151   2
   3  -6  -2 175.522 29.4753   4
  -3  -6   2 189.084 30.7228   2
  -3  -6   2 225.869 27.9633   3
   3   6  -1 28333.6 638.806   3
  -3   6   1 28205.2 686.947   1
   3  -6  -1 31256.4 655.659   2
   3  -6  -1 26477.3 655.654   4
  -3  -6   1 27323.6 680.429   2
  -3  -6   1 28105.2 649.978   3
  -3  -6   0 7537.67 218.029   3
   3   6   0 7754.42 209.415   3
   3  -6   0 7179.75 213.868   4
   3  -6   0 7880.46 207.570   2
  -3   6   0 7233.27 239.540   1
  -3  -6  -1 48702.3 1107.34   3
  -3   6  -1 48163.1 1131.25   1
   3  -6   1 50103.4 1078.08   2
   3   6   1 50635.4 1096.82   3
   3  -6   1 49392.2 1091.26   3
  -3  -6  -2 9026.94 265.993   3
   3  -6   2 9061.94 228.044   2
   3  -6   2 9392.08 248.154   3
   3   6   2 9836.39 259.709   3
  -3  -6  -3 10027.7 291.967   3
   3  -6   3 10371.4 273.753   3
   3  -6   3 10052.9 239.465   2
  -3  -6  -4 59.4827 26.4778   3
   3  -6   4 22.3523 5.56612   2
   3  -6   4 67.4857 14.6901   3
  -3  -6  -5 7893.62 261.024   3
   3  -6   5 8363.54 221.989   3
   3  -6   6 2106.24 82.5445   3
  -3  -6  -6 2042.58 112.892   3
   3  -6   7 755.744 44.1911   3
  -3  -6  -7 814.531 73.9717   3
  -3   6  -7 804.693 54.2263   3
  -3  -6  -8 3742.58 174.168   3
   3  -6   8 3770.17 121.720   3
  -3   6  -8 3657.11 137.758   3
  -3  -6  -9 6483.13 252.510   3
   3  -6   9 6549.36 187.673   3
  -3   6  -9 6487.44 208.229   3
  -3  -6 -10 5114.26 226.306   3
   3  -6  10 5189.40 161.312   3
  -3   6 -10 5129.73 183.366   3
  -3  -6 -11 25447.1 672.882   3
  -3   6 -11 25143.8 599.828   3
  -3   6 -12 17042.0 462.882   3
  -3  -6 -12 17817.9 542.832   3
  -3   6 -13 14109.5 408.679   3
  -3  -6 -13 15098.1 458.019   4
  -3  -6 -13 15008.4 490.389   3
  -3  -6 -14 14688.7 497.892   3
  -3  -6 -14 15136.0 462.991   4
  -3   6 -14 13677.3 405.284   3
  -3  -6 -15 12676.6 412.899   4
  -3  -6 -15 12249.6 455.358   3
  -3   6 -15 11518.2 362.737   3
  -3  -6 -16 4623.47 258.570   3
  -3  -6 -16 4436.58 217.224   4
  -3   6 -16 3978.48 184.739   3
  -3  -6 -17 1482.82 142.930   3
  -3  -6 -17 1465.67 121.340   4
  -3  -6 -18 442.118 90.0193   3
  -3  -6 -18 428.561 63.9642   4
  -3  -6 -19 128.241 40.9522   4
  -3  -6 -19 50.8053 57.1858   3
  -3  -6 -20 179.679 67.5612   3
  -3  -6 -21 2480.71 214.957   3
   3  -7 -22 60.9383 54.0632   3
   3  -7 -21 125.729 63.3986   3
   3  -7 -20 683.821 104.488   3
   3  -7 -19-9.40400 26.8316   3
   3  -7 -18 3888.16 236.392   3
   3  -7 -17 126.874 69.2666   3
  -3  -7  17 141.546 35.9171   2
   3  -7 -16 13601.7 484.865   3
  -3  -7  16 14387.8 403.417   2
   3  -7 -15 74.7873 38.0803   3
  -3  -7  15 87.8939 25.5461   2
   3  -7 -14 5739.37 261.768   3
  -3  -7  14 5988.61 210.030   2
   3   7 -14 5928.09 158.055   3
   3   7 -13 138.276 15.6904   3
   3  -7 -13 225.757 45.6006   5
   3  -7 -13 137.345 30.2701   3
  -3  -7  13 173.828 45.8530   2
   3  -7 -12 38.8362 20.7010   5
   3  -7 -12 93.6278 36.9138   4
   3   7 -12 40.2349 6.04403   3
   3  -7 -12 13.4401 33.2287   3
  -3  -7  12 61.1452 27.7165   2
  -3  -7  11 111.423 34.1572   2
   3  -7 -11 54.5847 23.2530   4
  -3  -7  11 69.4835 10.7713   1
   3  -7 -11 97.6566 40.5709   3
  -3  -7  10 1638.07 95.5876   2
   3  -7 -10 1598.87 107.828   4
  -3  -7  10 1659.92 77.9703   1
   3  -7 -10 1710.09 112.829   3
   3  -7  -9 80.0363 30.3279   3
   3  -7  -9 16.5762 18.9366   4
  -3  -7   9 24.2803 20.6401   2
  -3  -7   9 29.7246 15.1621   1
   3  -7  -8 18016.1 517.549   4
   3  -7  -8 19558.5 531.295   3
  -3  -7   8 19827.3 521.804   2
  -3  -7   8 20612.5 470.081   1
   3  -7  -7 436.698 52.5000   4
  -3  -7   7 477.512 55.0549   2
   3  -7  -6 38810.2 917.513   4
  -3  -7   6 38922.6 938.318   2
   3   7  -5 2043.76 62.2930   3
   3  -7  -5 2050.89 110.379   4
  -3  -7   5 2130.38 117.710   2
  -3  -7   4 46394.9 1096.89   2
  -3  -7   4 43256.0 1026.64   3
   3   7  -4 48282.1 1014.31   3
   3  -7  -4 45155.8 1076.16   4
   3   7  -3 5.48898 10.4495   1
  -3  -7   3 51.1129 27.2672   2
   3   7  -3 54.2989 19.9770   3
   3  -7  -3 26.1937 29.2468   4
  -3   7   3 16.5071 18.8930   1
  -3  -7   3 19.8340 11.6638   3
  -3  -7   2 61088.8 1461.60   2
   3   7  -2 60453.1 1403.90   3
   3  -7  -2 56036.4 1435.37   4
  -3   7   2 61215.6 1472.89   1
  -3  -7   2 61465.3 1418.34   3
   3   7  -2 61151.3 1420.32   1
  -3  -7   1 146.970 28.3391   3
  -3   7   1 154.518 34.9726   1
   3  -7  -1 128.141 28.9734   4
  -3  -7   1 154.206 39.9320   2
   3   7  -1 147.481 22.7905   3
   3  -7  -1 188.871 28.6793   2
   3   7   0 20538.0 480.579   3
  -3   7   0 20066.0 525.476   1
  -3  -7   0 19536.5 490.455   3
   3  -7   0 18706.3 488.277   4
   3  -7   0 21647.2 486.283   2
  -3  -7  -1 3051.88 123.695   3
   3   7   1 3196.27 118.886   3
   3  -7   1 2823.03 117.005   4
   3  -7   1 3294.87 116.446   3
  -3   7  -1 2953.55 142.143   1
   3  -7   1 3466.95 112.654   2
   3  -7   2-1.32419 8.27689   2
   3  -7   2 4.17905 10.4888   3
   3   7   2 21.2882 18.7235   3
  -3  -7  -2 11.8194 14.2734   3
  -3  -7  -3 639.926 58.0123   3
   3  -7   3 798.944 38.6530   2
   3  -7   3 692.734 48.7288   3
  -3  -7  -4 1457.99 87.7530   3
   3  -7   4 1218.48 50.0678   2
   3  -7   4 1577.52 73.9872   3
   3  -7   5 15.1693 8.10048   2
  -3  -7  -5 115.642 29.5056   3
   3  -7   5 176.448 25.4001   3
   3  -7   6 11532.7 285.715   3
  -3  -7  -6 11023.6 346.538   3
   3  -7   7 1254.50 56.3737   3
  -3  -7  -7 1065.72 89.2905   3
  -3  -7  -8 11753.4 373.348   3
   3  -7   8 11731.4 290.625   3
  -3  -7  -9 115.073 40.5917   3
   3  -7   9 49.5420 9.43403   3
  -3   7  -9 80.6253 24.3933   3
  -3  -7 -10 2262.34 145.869   3
   3  -7  10 2177.80 87.1559   3
  -3   7 -10 2162.22 99.3467   3
  -3  -7 -11 16.0741 35.5707   3
  -3   7 -11-2.93156 17.3255   3
  -3  -7 -12 79.4816 36.0560   3
  -3  -7 -12 70.8810 19.4684   4
  -3   7 -12 120.136 30.6377   3
  -3  -7 -13 711.179 92.6793   3
  -3   7 -13 838.718 65.4149   3
  -3  -7 -13 867.480 85.1683   4
  -3  -7 -14 817.389 97.8882   3
  -3   7 -14 916.395 72.2172   3
  -3  -7 -14 780.140 91.1744   4
  -3  -7 -15 88.1844 25.3699   3
  -3  -7 -15 98.0212 35.6033   4
  -3  -7 -16 8848.78 346.734   4
  -3  -7 -16 8404.15 383.518   3
  -3  -7 -17 535.223 79.0379   4
  -3  -7 -17 450.093 89.4011   3
  -3  -7 -18 13572.4 468.512   4
  -3  -7 -18 12330.4 514.945   3
  -3  -7 -19 536.180 73.8450   4
  -3  -7 -19 661.105 107.485   3
  -3  -7 -20 6462.45 361.792   3
  -3  -7 -20 5701.19 287.452   4
   3  -8 -22 8144.29 414.728   3
   3  -8 -21 5521.48 325.797   3
   3  -8 -20 8036.81 383.540   3
   3  -8 -19 5567.91 302.580   3
   3  -8 -18 5959.15 308.105   3
   3  -8 -17 2145.24 169.809   3
   3  -8 -16 133.227 33.2805   3
  -3  -8  16 298.863 45.8663   2
  -3  -8  15 17.7723 17.9304   2
   3  -8 -15 15.1705 46.5832   3
   3  -8 -14 4280.07 224.995   3
  -3  -8  14 4407.23 173.230   2
   3  -8 -13 1844.15 135.395   3
  -3  -8  13 2028.07 108.971   2
   3  -8 -13 1898.38 132.135   4
   3  -8 -13 2092.70 129.071   5
   3  -8 -12 6673.57 270.257   4
   3  -8 -12 6919.35 282.480   3
  -3  -8  12 6839.42 229.597   2
   3  -8 -11 3658.18 174.935   3
   3  -8 -11 3746.77 166.852   4
  -3  -8  11 3884.11 141.320   2
  -3  -8  10 9202.87 291.238   2
  -3  -8  10 9759.17 265.195   1
   3  -8 -10 9151.70 315.052   4
   3  -8 -10 8895.58 318.654   3
  -3  -8   9 8578.95 279.218   2
   3  -8  -9 7866.59 286.518   4
  -3  -8   9 8932.19 243.286   1
   3  -8  -9 8301.95 295.032   3
  -3  -8   8 9080.65 295.161   2
   3  -8  -8 9401.16 305.439   3
   3  -8  -8 8442.52 295.066   4
   3  -8  -7 2630.20 135.382   3
  -3  -8   7 2520.24 137.387   2
   3  -8  -7 2548.92 134.283   4
   3  -8  -6 6392.96 232.483   4
  -3  -8   6 6970.46 252.872   2
  -3  -8   5 141.204 32.9342   2
   3  -8  -5 98.0717 25.8832   4
  -3  -8   4 78.3155 21.9153   2
  -3  -8   4 84.7951 19.4775   3
   3   8  -4 23.4455 6.60123   3
   3  -8  -4 46.4014 19.4913   4
  -3   8   3 1132.40 88.0891   1
   3   8  -3 1157.76 52.4498   3
   3  -8  -3 1169.41 80.9499   4
  -3  -8   3 1136.75 83.2402   2
   3   8  -3 1144.30 64.9219   1
  -3  -8   3 1248.25 63.7546   3
  -3  -8   2 3676.80 161.801   2
   3   8  -2 4012.72 141.071   1
  -3   8   2 3833.07 172.055   1
  -3  -8   2 3882.61 133.862   3
   3   8  -2 4044.28 125.313   3
   3  -8  -2 3894.10 155.188   4
   3   8  -1 1607.05 72.1094   3
  -3  -8   1 1432.25 96.1602   2
  -3   8   1 1464.04 98.9190   1
   3  -8  -1 1400.88 84.1081   4
  -3  -8   1 1493.60 76.2656   3
  -3  -8   0 15514.4 401.916   3
   3   8   0 16172.6 389.879   3
   3  -8   0 14816.0 402.565   4
  -3   8   0 15376.1 439.694   1
   3   8   1 11112.1 299.651   3
  -3  -8  -1 10594.9 306.983   3
  -3   8  -1 9893.53 333.281   1
   3  -8   1 10190.7 299.047   4
   3  -8   1 12096.9 293.817   2
  -3  -8  -2 5789.77 203.708   3
   3  -8   2 6583.12 180.628   2
   3  -8   2 5553.40 188.982   4
   3  -8   2 6062.58 182.037   3
  -3  -8  -3 447.284 50.9932   3
   3  -8   3 491.966 32.3053   2
   3  -8   3 517.682 40.7018   3
  -3  -8  -4 4473.18 182.196   3
   3  -8   4 4720.89 152.506   3
   3  -8   4 4772.14 133.983   2
  -3  -8  -5 22.5477 12.1026   3
   3  -8   5 34.0385 13.9042   3
   3  -8   5 13.0399 8.97725   2
   3  -8   5 11.7197 4.40381   2
   3  -8   6 24.6135 11.4810   3
  -3  -8  -6 54.1092 30.9893   3
  -3  -8  -7 1202.68 92.3706   3
   3  -8   7 1177.36 51.5132   3
  -3  -8  -8 3193.01 158.313   3
   3  -8   8 2045.19 86.1944   3
  -3  -8  -9 6550.23 265.406   3
   3  -8   9 6215.23 173.134   3
  -3  -8 -10 17486.5 535.015   3
  -3  -8 -11 15176.5 494.273   3
  -3  -8 -12 13140.4 445.086   4
  -3  -8 -12 13351.9 461.590   3
  -3  -8 -13 12200.6 446.191   3
  -3  -8 -13 12107.5 426.791   4
  -3  -8 -14 12366.2 467.996   3
  -3  -8 -14 12371.2 437.764   4
  -3  -8 -15 3878.34 244.812   3
  -3  -8 -15 3830.12 215.363   4
  -3  -8 -16 2312.25 189.406   3
  -3  -8 -16 2745.77 182.266   4
  -3  -8 -17 1000.35 133.027   3
  -3  -8 -17 1059.73 114.957   4
  -3  -8 -18 625.016 113.638   3
  -3  -8 -18 654.200 85.2304   4
  -3  -8 -19-22.3360 50.5058   3
  -3  -8 -19-36.5916 56.5948   4
  -3  -8 -20 957.416 131.484   3
  -3  -8 -20 845.589 103.456   4
   3  -9 -21 355.271 109.400   3
   3  -9 -20 234.731 85.8659   3
   3  -9 -19 3988.25 250.910   3
   3  -9 -18 355.464 85.3111   3
   3  -9 -17 6456.68 320.373   3
   3  -9 -16 930.033 109.191   3
   3  -9 -15 15497.9 526.009   3
   3  -9 -14 729.394 96.7703   3
  -3  -9  14 693.297 63.6162   2
   3  -9 -14 768.481 78.8183   5
   3  -9 -13 8804.72 304.651   5
   3  -9 -13 8427.51 334.847   3
   3  -9 -13 8686.97 336.426   4
  -3  -9  13 8696.74 275.174   2
  -3  -9  12 1242.74 86.1433   2
   3  -9 -12 1457.43 115.598   4
   3  -9 -12 1211.25 112.550   3
  -3  -9  11 383.701 31.3334   2
   3  -9 -11 419.009 59.7117   3
   3  -9 -11 554.223 66.1833   4
  -3  -9  10 39.3608 37.2796   2
   3  -9 -10 20.4087 18.2743   3
   3  -9 -10 37.5450 18.1312   4
  -3  -9   9 10465.2 326.183   2
   3  -9  -9 9248.44 330.405   3
   3  -9  -9 9984.29 336.275   4
   3  -9  -8 113.432 28.4897   4
   3  -9  -8 98.3958 27.8197   3
  -3  -9   8 162.846 36.6352   2
   3  -9  -7 16639.7 475.464   4
   3  -9  -7 16275.5 465.931   3
  -3  -9   7 16674.9 486.439   2
  -3  -9   6 96.6308 40.3346   2
   3  -9  -6 92.2565 32.4435   3
   3  -9  -6 94.8598 41.5767   4
  -3  -9   5 31032.4 788.407   2
   3  -9  -5 30964.2 771.673   4
  -3  -9   4 703.352 69.7404   2
   3   9  -4 635.179 50.3610   1
   3  -9  -4 702.208 77.3517   4
  -3  -9   4 630.197 43.4637   3
   3   9  -3 43672.9 977.175   1
  -3   9   3 41248.8 1030.10   1
  -3  -9   3 41975.1 1020.00   2
  -3  -9   3 43458.7 956.068   3
   3  -9  -3 41840.4 1003.64   4
   3  -9  -2 210.717 49.4091   4
   3   9  -2 162.763 29.9010   1
  -3  -9   2 299.378 54.0210   2
  -3   9   2 209.952 42.4881   1
  -3  -9   2 212.707 32.7839   3
   3   9  -1 24352.9 549.843   3
   3  -9  -1 22524.2 584.176   4
  -3   9   1 22446.1 617.829   1
  -3  -9   1 23077.7 561.548   3
  -3  -9   1 22829.1 606.959   2
   3   9   0 100.016 26.0777   3
  -3  -9   0 118.041 25.5175   3
  -3   9   0 129.217 37.7539   1
   3  -9   0 109.276 29.9761   4
   3  -9   1 761.194 60.3165   4
  -3   9  -1 675.957 75.7528   1
  -3  -9  -1 754.939 61.3688   3
  -3  -9  -2 25.3996 26.2062   3
   3  -9   2 15.4451 10.7986   2
   3  -9   2 9.35992 16.0284   4
   3  -9   2 16.1515 14.5532   3
   3  -9   3 1418.14 73.2368   3
   3  -9   3 1425.49 67.0976   2
  -3  -9  -3 1310.48 89.6020   3
   3  -9   4 1186.34 55.4633   2
  -3  -9  -4 1105.06 86.8028   3
   3  -9   4 1085.84 64.6429   3
  -3  -9  -5 9045.51 293.080   3
   3  -9   5 8050.19 219.102   2
   3  -9   5 8705.27 225.622   3
   3  -9   5 8207.13 210.611   2
  -3  -9  -6 4.61686 18.9773   3
   3  -9   6 3.13949 6.65046   3
   3  -9   6 8.73582 6.35770   2
  -3  -9  -7 15923.0 473.465   3
  -3  -9  -8 571.327 75.8485   3
  -3  -9  -9 13460.7 440.857   3
  -3  -9 -10 55.4781 44.3528   3
  -3  -9 -11 3138.12 190.404   3
  -3  -9 -12-45.9919 28.8575   3
  -3  -9 -12-15.0399 23.8771   4
  -3  -9 -13 280.794 68.7658   3
  -3  -9 -13 266.284 55.0442   4
  -3  -9 -14 147.593 55.1118   3
  -3  -9 -14 92.0331 38.4703   4
  -3  -9 -15 1491.14 157.975   3
  -3  -9 -15 1639.92 141.409   4
  -3  -9 -16 1107.75 130.700   3
  -3  -9 -16 1122.21 123.999   4
  -3  -9 -17 10442.1 474.275   3
  -3  -9 -17 11781.2 450.739   4
  -3  -9 -18 1615.59 181.007   3
  -3  -9 -18 2090.05 178.932   4
  -3  -9 -19 10649.2 502.062   3
  -3  -9 -20 118.296 50.1970   4
   3 -10 -20 4393.51 286.731   3
   3 -10 -19 3575.68 240.837   3
   3 -10 -18 1370.41 146.645   3
   3 -10 -17 2203.45 184.295   3
   3 -10 -16 84.3902 39.8437   3
   3 -10 -15 46.2091 44.3636   3
   3 -10 -14 2534.54 150.791   5
   3 -10 -14 2172.03 167.077   3
   3 -10 -13 1566.59 133.349   3
   3 -10 -13 1941.01 124.142   5
   3 -10 -13 1711.16 144.380   4
  -3 -10  13 1852.80 107.795   2
   3 -10 -12 4751.96 239.653   3
  -3 -10  12 5160.76 197.195   2
   3 -10 -12 4990.94 239.721   4
  -3 -10  11 4427.60 182.009   2
   3 -10 -11 4273.36 214.023   4
   3 -10 -11 4047.69 214.742   3
   3 -10 -10 9378.91 342.434   3
   3 -10 -10 9021.33 336.981   4
  -3 -10  10 9677.49 312.665   2
  -3 -10   9 6237.93 238.441   2
   3 -10  -9 6019.82 253.499   3
   3 -10  -9 5730.48 249.935   4
   3 -10  -8 8063.42 301.114   4
   3 -10  -8 8427.68 301.492   3
  -3 -10   8 8386.48 300.679   2
   3 -10  -7 8204.88 295.345   4
  -3 -10   7 8360.23 306.558   2
   3 -10  -7 7874.13 283.151   3
   3 -10  -6 2603.85 139.258   3
   3 -10  -6 2530.04 143.914   4
  -3 -10   6 2727.51 159.597   2
  -3 -10   5 13.0651 26.3772   2
   3 -10  -5 9.60559 15.2495   4
   3 -10  -5 28.7501 27.9898   3
   3 -10  -4 1813.72 115.183   4
  -3 -10   4 1812.46 114.547   2
   3 -10  -4 1806.01 105.353   3
  -3  10   4 1789.42 119.951   1
  -3 -10   4 1236.46 70.0806   3
   3 -10  -3 586.573 55.7157   3
   3 -10  -3 536.813 66.5572   4
  -3  10   3 506.988 66.8142   1
  -3 -10   3 553.594 63.9829   2
   3  10  -3 528.166 49.1987   1
  -3 -10   3 602.868 47.3787   3
   3  10  -2 5602.24 199.240   1
  -3 -10   2 5800.94 183.934   3
  -3 -10   2 5671.60 225.595   2
   3 -10  -2 5581.81 216.370   4
  -3  10   2 5893.20 237.847   1
  -3 -10   1 2628.99 143.105   2
  -3  10   1 2494.25 145.320   1
   3  10  -1 2430.17 121.779   1
  -3 -10   1 2493.83 112.400   3
   3 -10  -1 2456.15 129.953   4
  -3 -10   0 5084.11 181.720   3
  -3  10   0 5033.66 216.189   1
   3 -10   0 4810.51 190.332   4
   3 -10   1 3192.74 145.269   4
  -3 -10  -1 3406.61 146.065   3
  -3  10  -1 3131.69 170.462   1
   3 -10   2 12884.1 375.551   4
  -3 -10  -2 13262.4 389.648   3
   3 -10   2 14162.7 358.545   3
  -3 -10  -3 785.306 70.4986   3
   3 -10   3 825.998 54.5517   2
   3 -10   3 709.368 52.0133   3
   3 -10   3 633.917 61.4097   4
  -3 -10  -4 6267.19 240.787   3
   3 -10   4 5396.95 187.606   3
  -3 -10  -5 602.218 64.3883   3
   3 -10   5 425.824 30.0661   2
   3 -10   5 464.190 41.3270   2
   3 -10   5 233.237 30.7095   3
  -3 -10  -6 227.477 48.2891   3
   3 -10   6 169.118 21.8971   2
  -3 -10  -7 2537.43 150.186   3
  -3 -10  -8 1454.99 112.817   3
  -3 -10  -9 4345.41 218.158   3
  -3 -10 -10 8246.86 331.436   3
  -3 -10 -11 6375.73 303.043   3
  -3 -10 -11 7197.41 310.065   4
  -3 -10 -12 7741.16 339.551   3
  -3 -10 -12 7960.06 340.150   4
  -3 -10 -13 7960.76 360.305   3
  -3 -10 -13 8656.71 364.025   4
  -3 -10 -14 5968.61 309.298   3
  -3 -10 -14 6054.24 297.336   4
  -3 -10 -15 8049.18 391.135   3
  -3 -10 -15 8764.42 376.059   4
  -3 -10 -16 1206.49 144.409   3
  -3 -10 -16 1559.87 148.686   4
  -3 -10 -17 1282.34 152.782   3
  -3 -10 -17 1217.00 140.235   4
  -3 -10 -18 222.148 71.1852   3
  -3 -10 -18 256.520 65.2829   4
   3 -11 -19 287.307 79.5914   3
   3 -11 -18 3649.96 252.647   3
   3 -11 -17 1474.45 158.873   3
   3 -11 -16 7251.34 348.361   3
   3 -11 -15 429.929 76.2116   3
   3 -11 -14 8541.98 302.494   5
   3 -11 -14 7282.33 336.306   4
   3 -11 -14 7826.38 346.881   3
   3 -11 -13 713.538 82.9494   3
   3 -11 -13 636.160 72.9004   5
   3 -11 -13 631.695 93.4767   4
   3 -11 -12 895.031 99.6269   4
   3 -11 -12 765.649 93.2977   3
  -3 -11  12 868.381 77.5275   2
   3 -11 -11 109.884 35.6005   4
  -3 -11  11 90.2246 23.3709   2
   3 -11 -11 86.1678 27.0799   3
  -3 -11  10 2316.34 136.133   2
   3 -11 -10 2343.91 149.102   3
   3 -11 -10 2063.80 145.926   4
   3 -11  -9 499.509 77.1104   4
  -3 -11   9 558.770 71.6960   2
   3 -11  -9 524.048 76.6843   3
   3 -11  -8 18204.4 546.794   4
   3 -11  -8 18404.7 537.269   3
  -3 -11   8 18509.6 543.401   2
   3 -11  -7 26.8477 41.0216   4
   3 -11  -7 18.6543 28.2781   3
  -3 -11   7 28.2349 41.3569   2
   3 -11  -6 18425.0 519.920   3
   3 -11  -6 18008.3 535.078   4
  -3 -11   6 19289.3 557.768   2
  -3 -11   5 107.117 49.3859   2
   3 -11  -5 125.691 46.7009   3
   3 -11  -5 126.775 46.7430   4
  -3  11   5 70.0511 28.7322   1
  -3 -11   4 30152.0 733.964   2
   3 -11  -4 29039.8 723.268   4
   3 -11  -4 28264.0 694.338   3
  -3  11   4 29052.5 748.935   1
   3  11  -3 301.855 43.5491   1
  -3  11   3 408.468 58.7345   1
   3 -11  -3 320.933 57.3777   3
  -3 -11   3 257.644 63.7151   2
  -3 -11   3 362.662 39.1893   3
   3 -11  -3 324.469 65.8857   4
  -3 -11   2 32234.4 737.760   3
  -3  11   2 31285.4 824.674   1
   3  11  -2 31912.2 771.021   1
  -3 -11   2 30246.9 801.858   2
   3 -11  -2 31552.2 793.553   4
   3 -11  -2 30694.5 757.685   3
   3 -11  -1 763.548 75.2353   4
  -3 -11   1 652.957 77.8301   2
   3 -11  -1 774.952 66.6913   3
  -3  11   1 729.085 82.9537   1
   3  11  -1 759.704 71.8636   1
  -3 -11   1 705.851 60.7780   3
  -3 -11   0 10087.1 299.969   3
   3 -11   0 9766.60 282.832   3
   3 -11   0 9701.28 313.416   4
  -3  11   0 9558.87 344.961   1
  -3 -11  -1 3384.96 152.314   3
  -3  11  -1 3011.25 169.911   1
   3 -11   1 3148.90 123.767   3
   3 -11   1 2857.69 142.138   4
  -3 -11  -2 291.552 42.8580   3
   3 -11   2 207.539 43.3888   4
   3 -11   2 236.454 32.7391   3
  -3 -11  -3 1876.27 118.717   3
   3 -11   3 1838.72 81.1573   3
   3 -11   3 1828.27 108.923   4
   3 -11   4 7092.16 193.777   3
  -3 -11  -4 7143.63 266.628   3
  -3 -11  -5 2703.67 155.359   3
   3 -11   5 2404.86 111.036   2
   3 -11   5 2645.31 86.4418   3
  -3 -11  -6 22073.6 553.310   3
   3 -11   6 15861.3 438.504   2
  -3 -11  -7 2534.76 156.399   3
  -3 -11  -8 20786.6 612.245   3
  -3 -11  -9 1303.08 124.727   3
  -3 -11 -10 8888.63 357.828   3
  -3 -11 -10 8921.69 365.411   4
  -3 -11 -11 124.314 60.2263   3
  -3 -11 -11 47.4178 27.7799   4
  -3 -11 -12 498.291 82.4026   4
  -3 -11 -12 300.908 68.3699   3
  -3 -11 -13 955.912 119.497   3
  -3 -11 -13 714.108 92.6364   4
  -3 -11 -14 2.53315 23.5482   3
  -3 -11 -14-63.0773 48.1376   4
  -3 -11 -15 19.7804 50.4901   3
  -3 -11 -15-70.5598 37.0651   4
  -3 -11 -16 3759.70 260.689   3
  -3 -11 -16 3892.72 250.733   4
  -3 -11 -17 474.668 98.1076   4
  -3 -11 -17 491.145 112.514   3
  -3 -11 -18 9209.72 427.708   4
  -3 -11 -19 1243.77 154.401   4
   3 -12 -18 1339.15 150.526   3
   3 -12 -17 120.853 59.7239   3
   3 -12 -16 187.109 50.7077   3
   3 -12 -15 3071.70 213.949   3
   3 -12 -14-21.5068 23.9541   3
   3 -12 -14 30.9414 36.3376   4
   3 -12 -13 8096.76 358.822   4
   3 -12 -13 7875.43 347.487   3
   3 -12 -13 8473.58 300.161   5
   3 -12 -12 573.513 89.0334   3
   3 -12 -12 645.583 96.0996   4
  -3 -12  11 13933.6 414.035   2
   3 -12 -11 13181.8 460.768   3
   3 -12 -11 12914.2 469.766   4
   3 -12 -10 2056.73 152.822   4
  -3 -12  10 2439.54 145.275   2
   3 -12 -10 2131.58 154.871   3
   3 -12  -9 17530.5 543.964   3
  -3 -12   9 18502.7 532.550   2
   3 -12  -9 17254.5 552.274   4
   3 -12  -8 1827.80 132.002   3
   3 -12  -8 1689.54 134.471   4
  -3 -12   8 1854.49 134.269   2
   3 -12  -7 13908.0 434.747   3
   3 -12  -7 13319.8 446.825   4
  -3 -12   7 14175.5 464.302   2
   3 -12  -6 2271.21 148.890   4
  -3  12   6 2029.96 141.947   1
  -3 -12   6 2266.78 157.162   2
   3 -12  -6 2087.44 130.887   3
   3 -12  -5 2809.47 151.202   3
  -3 -12   5 3209.57 179.189   2
   3 -12  -5 2708.96 163.418   4
  -3  12   5 2908.37 178.270   1
  -3 -12   4 296.659 54.5846   2
  -3  12   4 285.294 55.2312   1
   3 -12  -4 303.692 54.2524   3
   3 -12  -4 227.690 44.9062   4
  -3  12   3 4167.18 213.937   1
  -3 -12   3 4287.55 207.737   2
   3 -12  -3 4632.99 187.986   3
   3 -12  -3 4325.33 203.975   4
   3  12  -3 4586.40 189.495   1
  -3 -12   3 4491.61 156.339   3
  -3  12   2 42.7798 36.5332   1
   3  12  -2 48.2232 15.3064   1
   3 -12  -2 74.0559 40.4516   3
  -3 -12   2 30.2927 19.5272   3
   3 -12  -2 85.7182 42.3274   4
  -3 -12   2 24.2763 37.9441   2
   3  12  -1 12252.9 367.441   1
   3 -12  -1 11895.3 377.725   4
  -3 -12   1 11671.2 391.523   2
  -3  12   1 11968.5 406.982   1
   3 -12  -1 11444.5 339.183   3
  -3 -12   1 11745.5 335.115   3
   3  12   0 486.013 59.0416   1
   3 -12   0 618.000 61.3718   3
  -3 -12   0 556.294 62.7428   3
   3 -12   0 492.082 62.5227   4
  -3  12   0 635.901 77.3673   1
  -3 -12  -1 15055.4 424.359   3
  -3  12  -1 14377.0 471.090   1
   3 -12   1 14674.7 385.131   3
   3 -12   1 14126.4 427.677   4
  -3 -12  -2 1322.88 94.9229   3
   3 -12   2 1250.42 72.1892   3
   3 -12   2 1174.51 93.2762   4
   3 -12   3 10788.9 280.501   3
   3 -12   3 9952.99 329.161   4
  -3 -12  -3 10722.3 351.892   3
  -3 -12  -4 1377.64 108.013   3
   3 -12   4 1177.41 81.0659   2
  -3 -12  -5 7601.38 295.220   3
   3 -12   5 7638.19 236.075   2
  -3 -12  -6 1280.19 119.418   3
  -3 -12  -7 1019.12 104.194   3
  -3 -12  -8 3842.47 210.823   3
  -3 -12  -9 2159.89 161.333   3
  -3 -12  -9 2145.41 162.061   4
  -3 -12 -10 2447.92 173.280   3
  -3 -12 -10 2618.31 182.471   4
  -3 -12 -11 8066.16 361.577   3
  -3 -12 -11 8540.15 367.245   4
  -3 -12 -12 3906.55 238.743   3
  -3 -12 -12 3968.33 244.693   4
  -3 -12 -13 7841.29 375.963   3
  -3 -12 -13 8963.00 387.308   4
  -3 -12 -14 3711.58 251.578   3
  -3 -12 -14 4223.87 262.508   4
  -3 -12 -15 3998.05 268.540   3
  -3 -12 -15 5013.67 287.696   4
  -3 -12 -16 1406.69 148.639   3
  -3 -12 -16 1751.20 162.090   4
  -3 -12 -17 1099.55 136.251   4
   3 -13 -17 5048.82 298.047   3
   3 -13 -16 4449.59 273.554   3
   3 -13 -15 9185.04 407.477   3
   3 -13 -14 2758.56 204.585   3
   3 -13 -13 7911.31 353.562   3
   3 -13 -13 7519.63 350.569   4
   3 -13 -12 2867.36 193.410   3
   3 -13 -12 3095.60 208.148   4
   3 -13 -11 313.648 63.2114   3
   3 -13 -11 339.172 71.5566   4
  -3 -13  10 1724.44 129.513   2
   3 -13 -10 1556.19 136.284   4
   3 -13 -10 1700.49 134.406   3
   3 -13  -9 2107.33 159.277   4
  -3 -13   9 2280.06 152.044   2
   3 -13  -9 1963.72 144.137   3
   3 -13  -8 803.477 90.1823   3
   3 -13  -8 851.189 100.677   4
  -3 -13   8 886.609 101.409   2
   3 -13  -7 5588.53 243.798   3
  -3  13   7 5037.90 253.198   1
  -3 -13   7 5556.56 262.703   2
   3 -13  -7 5281.92 252.882   4
  -3 -13   6 98.6685 51.9123   2
  -3  13   6 55.5451 35.3181   1
   3 -13  -6 30.4158 32.2535   3
   3 -13  -6 36.8922 23.9640   4
  -3  13   5 12260.6 433.347   1
   3 -13  -5 12739.9 395.056   3
   3 -13  -5 12281.7 420.649   4
  -3 -13   5 11855.5 420.976   2
  -3 -13   4 129.807 51.7149   2
   3 -13  -4 156.836 52.9623   4
  -3  13   4 99.1941 48.8711   1
   3 -13  -4 133.487 44.8294   3
  -3 -13   3 13812.4 456.978   2
   3 -13  -3 14021.8 416.864   3
  -3  13   3 13387.3 469.765   1
   3 -13  -3 14694.7 460.706   4
   3  13  -3 15104.6 433.212   1
  -3  13   2 386.290 65.1632   1
  -3 -13   2 415.385 75.1131   2
  -3 -13   2 394.023 45.6795   3
   3 -13  -2 361.565 63.8683   4
   3  13  -2 454.039 58.7265   1
   3 -13  -2 448.019 60.7241   3
  -3 -13   1 4838.93 180.697   3
   3 -13  -1 4947.90 188.645   3
   3 -13  -1 4574.30 213.534   4
  -3  13   1 4619.73 234.059   1
  -3 -13   1 4385.81 220.338   2
   3  13  -1 4721.72 206.460   1
   3  13   0 2335.33 140.125   1
   3 -13   0 2320.22 115.831   3
  -3 -13   0 2225.76 152.360   2
  -3  13   0 2143.10 152.607   1
   3 -13   0 2092.18 136.539   4
  -3 -13   0 2331.43 125.639   3
  -3 -13  -1 85.6639 39.1204   3
   3  13   1 69.3324 25.5839   1
   3 -13   1 36.1054 17.9201   3
  -3  13  -1 63.4478 39.4729   1
   3 -13   1 53.5003 34.5714   4
   3 -13   2 1155.76 96.5946   4
  -3 -13  -2 1244.04 101.623   3
  -3 -13  -3 2124.94 137.450   3
   3 -13   4 2412.11 126.611   2
  -3 -13  -4 2936.67 165.682   3
  -3 -13  -5 10512.7 375.519   3
  -3 -13  -6 4521.66 226.310   3
  -3 -13  -7 11147.6 408.622   3
  -3 -13  -8 5146.40 260.539   3
  -3 -13  -8 5530.40 283.068   4
  -3 -13  -9 10113.6 397.898   3
  -3 -13  -9 10485.0 420.822   4
  -3 -13 -10 993.908 120.478   3
  -3 -13 -10 1197.45 133.351   4
  -3 -13 -11 1501.01 145.608   3
  -3 -13 -11 1395.13 148.001   4
  -3 -13 -12 9.19660 26.7505   3
  -3 -13 -12 9.31889 32.8636   4
  -3 -13 -13 221.498 67.6796   3
  -3 -13 -13 324.619 63.5279   4
  -3 -13 -14 227.497 78.3914   3
  -3 -13 -14 308.877 72.8351   4
  -3 -13 -15 2771.79 217.907   3
  -3 -13 -15 3228.65 238.469   4
   3 -14 -16 123.624 37.2322   3
   3 -14 -15 30.8161 32.6993   3
   3 -14 -14 4777.98 277.690   3
   3 -14 -13 104.254 50.3969   3
   3 -14 -13 52.6265 66.7948   4
   3 -14 -12 10722.4 435.403   3
   3 -14 -12 11680.0 464.971   4
   3 -14 -11 257.860 60.7222   3
   3 -14 -11 288.660 67.5033   4
   3 -14 -10 13834.8 495.983   4
   3 -14 -10 13182.3 473.898   3
   3 -14  -9 112.918 47.6143   3
   3 -14  -9 127.014 62.6980   4
   3 -14  -8 10828.3 411.864   4
   3 -14  -8 10730.4 390.005   3
  -3 -14   8 11061.8 409.032   2
  -3  14   8 10099.9 414.274   1
  -3  14   7 14.0740 39.2860   1
   3 -14  -7 71.7692 36.2478   3
  -3 -14   7 49.2824 37.9759   2
   3 -14  -7 48.6180 49.9520   4
  -3 -14   6 6168.72 290.085   2
  -3  14   6 5546.55 279.553   1
   3 -14  -6 5684.78 247.981   3
   3 -14  -6 5863.04 276.818   4
  -3 -14   5 453.324 81.1406   2
   3 -14  -5 528.869 70.8762   3
   3 -14  -5 549.560 76.3283   4
  -3  14   5 360.964 67.2902   1
  -3 -14   4 1287.12 121.190   2
  -3  14   4 1161.00 115.966   1
   3 -14  -4 1295.79 100.810   3
   3 -14  -4 1290.35 114.646   4
   3 -14  -3 1757.43 138.721   4
   3  14  -3 1892.25 125.632   1
  -3 -14   3 1720.81 136.883   2
   3 -14  -3 2174.92 127.527   3
  -3  14   3 1700.09 147.392   1
   3 -14  -2 10671.6 333.798   3
  -3 -14   2 9689.98 376.978   2
   3  14  -2 10982.7 357.030   1
   3 -14  -2 9767.44 365.798   4
  -3  14   2 9847.23 391.589   1
   3 -14  -1 1760.19 109.178   3
   3  14  -1 1561.36 117.350   1
   3 -14  -1 1546.25 122.790   4
  -3 -14   1 1571.99 129.907   2
  -3  14   1 1416.05 129.218   1
  -3  14   0 15309.2 520.783   1
  -3 -14   0 14325.7 499.872   2
   3  14   0 15953.1 477.167   1
   3 -14   0 15112.4 478.619   4
  -3 -14   0 15985.8 443.022   3
  -3 -14  -1 4059.55 187.890   3
   3  14   1 4090.31 203.353   1
  -3 -14  -1 3634.05 215.066   2
   3 -14   1 3926.19 200.326   4
   3 -14   2 18829.8 556.171   4
   3  14   2 18664.6 568.286   1
  -3 -14  -2 19911.9 554.937   3
  -3 -14  -3 4384.93 216.631   3
  -3 -14  -4 12876.0 433.748   3
  -3 -14  -5 182.769 59.4570   3
  -3 -14  -6 6095.47 278.309   3
  -3 -14  -6 5910.82 294.555   4
  -3 -14  -7-1.45596 30.9964   3
  -3 -14  -7 77.7605 25.6619   4
  -3 -14  -8 288.794 74.0053   3
  -3 -14  -8 172.795 36.5671   4
  -3 -14  -9 125.563 53.2961   3
  -3 -14  -9 6.04654 40.1349   4
  -3 -14 -10 2091.98 170.715   3
  -3 -14 -10 2057.11 176.817   4
  -3 -14 -11 1278.86 144.175   3
  -3 -14 -11 1536.51 146.746   4
  -3 -14 -12 7399.58 361.821   4
  -3 -14 -12 6556.85 340.916   3
  -3 -14 -13 3499.49 248.466   4
  -3 -14 -13 2891.71 230.325   3
  -3 -14 -14 4236.40 287.942   3
  -3 -14 -14 5609.54 325.359   4
   3 -15 -15 5116.36 305.507   3
   3 -15 -14 4175.79 262.909   3
   3 -15 -13 3659.39 237.960   3
   3 -15 -12 2168.62 184.011   4
   3 -15 -12 2068.50 172.752   3
   3 -15 -11 827.326 118.169   4
   3 -15 -11 548.794 93.9970   3
   3 -15 -10-6.48747 27.5680   3
   3 -15 -10 42.8228 44.4304   4
   3 -15  -9 34.1984 44.9558   4
  -3  15   9 74.0358 40.8982   1
   3 -15  -9-17.9868 24.5046   3
   3 -15  -8 2477.80 184.393   4
   3 -15  -8 2601.30 178.371   3
   3 -15  -7 305.629 72.4687   4
  -3 -15   7 290.027 64.1213   2
   3 -15  -7 225.383 59.8855   3
  -3  15   7 307.025 79.1397   1
  -3  15   6 5917.89 300.399   1
   3 -15  -6 6877.66 286.464   3
   3 -15  -6 6314.61 303.366   4
  -3 -15   6 6829.08 318.355   2
   3 -15  -5 1082.21 103.398   3
  -3 -15   5 865.880 113.882   2
   3 -15  -5 1026.69 122.583   4
  -3  15   5 775.666 93.7767   1
  -3 -15   4 8615.27 359.879   2
   3 -15  -4 9639.48 333.221   3
  -3  15   4 9178.06 380.476   1
   3 -15  -4 8803.47 363.431   4
  -3 -15   3 1101.73 118.930   2
   3 -15  -3 1201.72 104.912   3
  -3  15   3 1029.97 112.760   1
   3 -15  -3 1255.75 124.164   4
  -3 -15   2 3492.24 211.480   2
   3 -15  -2 3476.94 203.494   4
  -3  15   2 3358.29 218.139   1
   3  15  -2 3795.34 192.981   1
  -3  15   1 1108.62 123.703   1
   3 -15  -1 1028.87 108.679   4
  -3 -15   1 982.266 107.773   2
   3  15  -1 1217.58 115.933   1
   3  15   0 98.1309 48.7542   1
  -3 -15   0 64.9142 28.6784   2
   3 -15   0 111.302 50.4949   4
  -3  15   0 25.4167 33.7614   1
   3  15   1 67.5160 40.3379   1
   3 -15   1 92.7089 57.9694   4
  -3 -15  -1 98.8965 46.3776   2
   3  15   2 861.645 95.3552   1
   3  15   3 2759.53 177.291   1
  -3 -15  -3 3018.39 177.432   3
  -3 -15  -4 2158.35 172.796   4
  -3 -15  -4 2514.30 168.620   3
  -3 -15  -5 3622.11 229.956   4
  -3 -15  -5 4194.82 228.836   3
  -3 -15  -6 8812.21 392.537   4
  -3 -15  -6 9950.71 390.701   3
  -3 -15  -7 3361.73 213.371   3
  -3 -15  -7 2776.11 202.573   4
  -3 -15  -8 3916.21 238.740   3
  -3 -15  -8 3882.33 249.536   4
  -3 -15  -9 3421.74 227.968   3
  -3 -15  -9 3357.59 240.784   4
  -3 -15 -10 2525.33 197.167   3
  -3 -15 -10 2937.54 219.809   4
  -3 -15 -11 172.353 51.4003   4
  -3 -15 -11 135.932 38.6975   3
  -3 -15 -12 99.5341 67.3207   3
  -3 -15 -13 50.9407 55.2334   3
   3 -16 -13 4366.19 274.248   3
   3 -16 -12 9.40962 46.1626   3
   3 -16 -11 11780.6 480.812   4
   3 -16 -11 10097.9 425.502   3
  -3  16  11 9651.88 430.284   1
   3 -16 -10 641.259 95.3475   3
  -3  16  10 660.221 109.972   1
   3 -16 -10 665.696 117.945   4
  -3  16   9 7412.03 353.413   1
   3 -16  -9 7634.92 338.136   3
   3 -16  -9 7742.01 373.990   4
   3 -16  -8 84.8866 25.9355   3
  -3  16   8 108.866 45.6068   1
   3 -16  -8 86.3089 47.6409   4
  -3  16   7 1541.24 144.821   1
   3 -16  -7 1443.75 125.759   3
   3 -16  -7 1497.94 150.825   4
   3 -16  -6 177.863 57.9559   3
  -3 -16   6 190.211 26.7124   4
   3 -16  -6 283.251 68.8739   4
  -3  16   6 298.282 60.8609   1
  -3 -16   6 194.365 50.7106   2
  -3  16   5 192.425 47.9217   1
  -3 -16   5 288.881 74.4891   2
  -3 -16   5 62.6280 36.2078   4
   3 -16  -5 132.184 41.0481   4
  -3 -16   4 17.1165 49.4505   2
  -3  16   4-17.3186 34.3606   1
   3 -16  -4 7.24102 53.2287   4
  -3 -16   4-10.5187 41.4002   4
  -3 -16   3 2158.11 166.315   2
   3 -16  -3 2094.96 166.907   4
  -3  16   3 2358.37 189.132   1
  -3 -16   3 2224.35 156.499   4
   3  16  -2 182.568 22.9644   1
  -3 -16   2 99.3453 35.7624   4
  -3  16   2 148.922 50.4219   1
  -3 -16   2 184.465 63.1364   2
   3 -16  -2 121.777 66.8452   4
  -3  16   1 13369.1 501.236   1
  -3 -16   1 11827.2 464.337   2
  -3 -16   1 11899.8 457.475   4
   3 -16  -1 13778.6 471.482   4
   3  16  -1 13775.9 446.059   1
  -3 -16   0 334.723 78.7556   2
  -3 -16   0 274.273 72.7748   4
   3  16   0 334.451 64.2611   1
   3 -16   0 364.624 75.5774   4
  -3 -16  -1 15092.4 546.220   2
   3  16   1 17280.7 528.615   1
  -3 -16  -1 15264.7 547.101   4
   3  16   2 938.279 116.953   1
  -3 -16  -2 639.797 112.664   2
  -3 -16  -2 685.375 105.917   4
   3  16   3 15095.8 502.741   1
  -3 -16  -3 13148.5 508.603   4
  -3 -16  -4 303.381 71.9482   4
   3  16   4 367.497 80.2774   1
  -3 -16  -5 6646.37 334.528   4
  -3 -16  -6 79.0231 41.6148   4
  -3 -16  -6 58.5718 39.5000   3
  -3 -16  -7 355.667 69.0941   4
  -3 -16  -7 464.687 76.7741   3
  -3 -16  -8 177.702 38.9612   3
  -3 -16  -8 233.280 59.9894   4
  -3 -16  -9 926.456 111.805   3
  -3 -16 -10 80.2502 67.1081   3
  -3 -16 -11 2980.40 227.439   3
  -3 -16 -12 170.373 51.4856   3
   3 -17 -12 2377.63 198.922   3
   3 -17 -11 1114.34 127.408   3
   3 -17 -10-98.6752 70.4720   3
  -3  17   9 36.5123 58.0329   1
   3 -17  -9-53.5735 60.5192   3
   3 -17  -8 918.941 139.081   4
  -3  17   8 850.255 123.400   1
  -3  17   7 1078.86 135.099   1
   3 -17  -7 1000.94 127.895   4
  -3  17   6 2465.24 194.187   1
   3 -17  -6 2470.36 198.110   4
  -3  17   5 3093.22 214.537   1
  -3 -17   5 2492.90 183.177   4
   3 -17  -5 3142.86 216.015   4
  -3  17   4 3035.40 221.469   1
  -3 -17   4 3214.80 223.145   2
  -3 -17   4 2849.30 190.081   4
   3 -17  -4 3016.78 220.152   4
  -3 -17   3 1873.12 164.305   2
  -3 -17   3 1723.86 140.096   4
   3 -17  -3 2024.96 174.725   4
  -3  17   3 1986.91 176.309   1
  -3  17   2 1815.33 159.243   1
  -3 -17   2 1257.22 130.786   4
  -3 -17   2 1460.67 140.334   2
   3 -17  -2 1955.32 168.542   4
  -3  17   1 1131.58 122.932   1
  -3 -17   1 895.506 114.125   4
  -3 -17   1 1092.01 127.965   2
  -3 -17   0 332.258 59.1021   4
  -3 -17   0 522.643 84.3116   2
  -3 -17  -1 4.70079 25.4900   2
   3  17   1 28.6594 34.7047   1
  -3 -17  -1-11.9890 43.4743   4
   3  17   2 427.605 75.7390   1
  -3 -17  -2 367.406 69.9844   4
  -3 -17  -2 355.159 71.4648   2
  -3 -17  -3 1703.89 160.726   4
  -3 -17  -3 1729.40 165.970   2
   3  17   4 4525.13 255.444   1
  -3 -17  -4 4458.42 276.905   4
  -3 -17  -5 7749.40 380.643   4
  -3 -17  -6 6710.96 344.578   4
   3  17   6 5992.88 304.584   1
  -3 -17  -9 2115.83 200.486   3
  -3 -17 -10 694.696 109.556   3
  -3  18   6 1056.69 127.973   1
  -3  18   5-71.5340 35.7135   1
  -3  18   4 463.433 100.566   1
  -3  18   3-42.0815 58.8413   1
  -3 -18   3-73.7211 63.6424   4
  -3 -18   2 3620.98 243.097   2
  -3  18   2 4158.59 263.204   1
  -3 -18   2 3730.60 231.380   4
  -3 -18   1 392.413 76.5825   2
  -3 -18   1 422.395 75.1230   4
  -3 -18   0 9826.34 435.949   2
  -3 -18   0 10322.2 430.461   4
  -3 -18  -1 32.3979 29.5041   4
  -3 -18  -1 77.2093 51.0957   2
  -3 -18  -2 10183.4 437.368   4
  -3 -18  -2 9732.85 440.517   2
  -3 -18  -3 32.1815 59.9483   4
  -3 -18  -3 89.5851 43.1295   2
  -3 -18  -4 5501.01 341.296   2
  -3 -18  -5 282.656 100.838   2
   3  18   6 1470.76 151.892   1
   3  18   7 50.8891 45.9255   1
  -3 -19   1 243.365 62.4435   2
  -3 -19   0-30.1026 31.8162   2
  -3 -19  -1 536.975 112.917   2
   4   0 -25 78.8173 35.6654   3
   4   0 -24 1050.25 127.378   3
   4   0 -23 30.0906 35.2358   3
   4   0 -22 848.124 98.2631   3
   4   0 -21-3.05551 27.0906   3
   4   0 -20 3330.19 194.423   3
   4   0 -19 27.3588 35.2743   3
   4   0 -18 10002.4 354.674   3
   4   0 -17-1.92222 16.7338   3
   4   0 -16 11753.0 377.959   3
   4   0 -15 44.3794 34.6822   3
   4   0 -14 1395.35 93.5713   3
  -4   0  14 1117.60 92.1207   2
   4   0 -13-10.7794 14.9898   3
  -4   0  13 30.5595 26.9324   2
  -4   0  12 954.426 81.8145   2
  -4   0  11 29.3376 29.2850   2
   4   0 -10 20566.3 535.649   5
  -4   0  10 21725.2 541.724   2
  -4   0   9 4.95329 12.7291   2
   4   0  -9 1.46588 19.8938   5
   4   0  -8 85462.0 1830.58   2
  -4   0   8 81625.3 1825.31   2
   4   0  -7 29.7345 21.5273   2
  -4   0   7-0.14396 16.5453   2
  -4   0   6 87514.1 1986.20   2
   4   0  -6 96115.0 1989.90   2
  -4   0   5 72.0599 21.0021   2
   4   0  -5 12.9794 16.7851   2
  -4   0   4 45122.9 985.966   2
   4   0  -4 43500.5 976.430   2
  -4   0   4 45914.1 949.633   1
   4   0  -3-1.57803 14.3977   3
  -4   0   3 20.8059 17.9809   2
   4   0  -3 11.2348 14.1702   2
  -4   0   3 13.2185 12.3057   1
  -4   0   2 19429.2 466.523   2
   4   0  -2 19194.4 434.553   1
   4   0  -2 18689.2 461.034   2
  -4   0   2 19644.6 465.591   3
   4   0  -2 19243.5 459.786   3
   4   0  -1 4.92232 16.6117   2
  -4   0   1 19.9846 11.4914   2
   4   0  -1 49.3897 23.3622   3
  -4   0   1 52.8985 14.4646   3
   4   0   0 4152.14 145.784   3
   4   0   0 3946.01 134.026   2
  -4   0   0 4241.61 147.965   3
  -4   0   0 3875.08 134.835   2
   4   0   1 7.87137 12.7541   2
   4   0   1 45.1341 19.3905   3
  -4   0  -1 38.3141 16.2192   3
  -4   0  -1 7.48614 19.2282   2
  -4   0  -2 12173.5 329.756   3
  -4   0  -2 12168.5 308.389   2
   4   0   2 12579.7 323.486   3
   4   0   3 2.28572 22.0361   3
  -4   0  -3-12.8055 11.9169   3
  -4   0  -3 22.2940 16.9685   2
   4   0   4 39594.1 886.976   3
  -4   0  -4 37992.9 862.571   2
  -4   0  -4 38348.6 896.208   3
   4   0   5 0.20009 15.8923   3
  -4   0  -5 23.7286 17.0208   3
  -4   0  -6 60634.8 1361.61   3
  -4   0  -7 24.8126 23.3304   3
  -4   0  -8 21306.5 553.656   3
  -4   0  -9 36.2026 29.3824   3
  -4   0 -10 1172.58 89.6869   3
  -4   0 -11-9.09133 18.8785   3
  -4   0 -12 14.8418 34.0891   3
  -4   0 -13 1.78423 23.7810   3
  -4   0 -13-1.34990 12.4518   4
  -4   0 -14 13223.9 438.041   3
  -4   0 -14 13712.5 350.267   4
  -4   0 -15 22.3262 37.5302   3
  -4   0 -15 22.4230 16.7329   4
  -4   0 -16 12434.6 440.960   3
  -4   0 -17 26.4072 37.9745   3
  -4   0 -18 7212.83 328.329   3
  -4   0 -19 22.4587 50.9053   3
  -4   0 -20 2901.91 205.712   3
  -4   0 -21 76.6689 51.6196   3
  -4   0 -22 35.5707 37.5622   3
  -4   0 -23-40.6126 64.8516   3
   4  -1 -26 3170.74 233.513   3
   4  -1 -25 6167.61 323.375   3
   4   1 -24 4607.44 255.970   3
   4  -1 -24 4604.09 260.334   3
   4   1 -23 5684.69 275.889   3
   4  -1 -23 5206.99 281.739   3
   4   1 -22 10345.6 384.081   3
   4  -1 -22 9214.14 386.862   3
   4   1 -21 8885.63 340.361   3
   4  -1 -21 8651.04 357.610   3
   4   1 -20 8076.29 309.137   3
   4  -1 -20 7122.49 311.769   3
   4   1 -19 4463.34 212.030   3
   4  -1 -19 4368.32 222.890   3
   4   1 -18 1613.78 118.323   3
   4  -1 -18 1488.95 120.220   3
   4  -1 -17 73.0032 25.2839   3
   4   1 -17 6.59671 16.7065   3
   4   1 -16 108.815 35.3040   3
   4  -1 -16 85.8887 29.3499   3
  -4  -1  15 13254.8 396.288   2
   4   1 -15 13287.3 392.551   3
   4  -1 -15 12833.0 407.303   3
   4  -1 -14 3405.53 167.934   3
  -4  -1  14 3474.48 163.439   2
   4   1 -14 3586.58 157.518   3
   4   1 -13 6592.60 226.866   3
   4  -1 -13 6579.74 240.301   3
  -4  -1  13 6344.04 233.036   2
  -4  -1  12 9811.37 316.784   2
  -4   1  12 9982.38 324.013   2
  -4   1  11 8198.90 273.190   2
  -4  -1  11 8192.79 263.762   2
   4  -1 -11 8617.97 273.321   5
  -4   1  10 11274.8 328.858   2
   4  -1 -10 11418.2 330.095   5
  -4  -1  10 10926.9 322.695   2
  -4  -1   9 5273.37 184.660   2
  -4   1   9 5132.65 185.883   4
  -4   1   9 5455.95 189.444   2
   4   1  -8 24378.4 570.850   2
   4   1  -8 23594.2 564.749   5
  -4   1   8 22152.3 567.560   2
  -4  -1   8 22220.5 567.745   2
   4  -1  -7 4503.31 157.399   2
  -4   1   7 4116.28 149.289   2
   4   1  -7 3941.97 145.590   5
   4   1  -7 4710.10 157.195   2
  -4  -1   7 4046.12 152.663   2
   4  -1  -6 1159.60 68.7008   2
   4   1  -6 1231.32 69.1604   2
  -4  -1   6 985.665 65.3610   2
  -4   1   6 1070.56 65.2242   2
   4  -1  -5 9179.02 252.590   2
  -4  -1   5 9481.87 261.887   2
   4   1  -5 8801.68 253.847   2
  -4   1   5 8814.77 252.593   2
   4   1  -4 384.930 37.5307   2
  -4  -1   4 391.134 21.9513   1
  -4  -1   4 390.861 43.9660   2
  -4   1   4 348.974 35.8112   2
   4   1  -4 361.231 31.4498   3
   4  -1  -4 382.358 37.9612   2
   4  -1  -3 33233.2 751.184   2
  -4   1   3 33455.5 738.409   1
  -4  -1   3 31828.1 771.190   2
   4   1  -3 32517.1 751.394   3
   4   1  -3 35706.7 771.578   2
  -4   1   3 33539.9 756.406   2
  -4   1   2 3134.22 101.653   1
   4  -1  -2 3254.71 102.005   1
   4   1  -2 3363.90 124.224   2
   4  -1  -2 3026.22 107.303   2
  -4  -1   2 2970.68 122.524   2
   4  -1  -2 3223.47 112.875   3
  -4  -1   2 2365.64 118.105   3
   4   1  -2 3290.03 89.3395   1
   4   1  -2 2749.07 116.190   3
  -4   1   2 3117.89 111.915   2
   4  -1  -1 101448. 2134.07   1
  -4  -1   1 97021.5 2159.96   3
   4  -1  -1 100824. 2147.69   3
  -4   1   1 103658. 2144.83   2
   4   1  -1 98692.9 2154.40   2
   4  -1  -1 99774.7 2135.19   2
  -4  -1   1 102202. 2162.69   2
   4   1  -1 95627.7 2158.10   3
  -4   1   1 100207. 2156.84   3
  -4  -1   0 580.760 45.1405   2
  -4   1   0 479.601 41.5560   3
   4  -1   0 412.176 38.2977   2
  -4  -1   0 608.058 51.2297   3
  -4   1   0 456.772 36.6346   2
   4   1   0 627.621 46.9798   2
   4   1   0 553.568 46.5942   3
   4  -1   0 594.909 48.8951   3
   4  -1   1 17644.4 435.812   2
  -4   1  -1 17591.8 435.383   2
   4   1   1 20092.9 455.544   3
   4  -1   1 18703.9 461.951   3
  -4   1  -1 18784.3 465.873   3
   4   1   1 17621.7 443.655   2
  -4  -1  -1 19103.2 460.668   3
  -4  -1  -1 19169.6 446.937   2
   4  -1   2 644.652 41.0302   2
  -4  -1  -2 839.381 53.0007   2
   4  -1   2 803.295 53.8788   3
  -4   1  -2 715.920 44.5220   2
   4   1   2 818.208 54.7073   3
  -4  -1  -2 932.465 59.6115   3
  -4   1  -2 826.773 63.4340   3
   4   1   3 27355.6 615.392   3
  -4  -1  -3 25993.7 599.810   2
   4  -1   3 26665.9 615.034   3
  -4   1  -3 25794.3 590.899   2
  -4   1  -3 25158.0 621.325   3
  -4  -1  -3 24828.4 617.331   3
  -4   1  -4 143.117 21.6010   2
   4  -1   4 208.343 31.8940   3
  -4  -1  -4 115.336 30.9431   3
   4   1   4 112.713 26.9559   3
  -4   1  -4 107.106 23.6015   3
   4  -1   5 2774.26 114.621   3
   4   1   5 2847.09 117.782   3
  -4   1  -5 2831.74 94.4472   2
  -4   1  -5 2823.03 121.424   3
  -4  -1  -5 2764.50 123.255   3
   4  -1   6 8266.00 239.632   3
  -4   1  -6 8171.63 211.590   2
  -4   1  -6 7772.06 247.584   3
  -4  -1  -6 7765.31 251.866   3
  -4  -1  -7 4035.43 164.158   3
  -4   1  -7 3990.22 158.990   3
  -4   1  -8 10046.0 301.709   3
  -4  -1  -8 9486.53 303.335   3
  -4   1  -9 19179.3 514.440   3
  -4  -1  -9 19289.1 521.370   3
  -4   1 -10 18048.7 495.256   3
  -4  -1 -10 17815.8 502.714   3
  -4   1 -11 9756.70 322.969   3
  -4  -1 -11 9544.47 327.168   3
  -4  -1 -12 14377.6 459.077   3
  -4   1 -12 15522.8 395.998   2
  -4   1 -12 15438.1 366.888   4
  -4   1 -12 14817.4 451.512   3
  -4  -1 -13 16578.5 526.547   3
  -4   1 -13 18393.1 423.265   4
  -4  -1 -13 18054.8 457.950   4
  -4   1 -13 16935.1 517.210   3
  -4   1 -14 10442.4 376.041   3
  -4  -1 -14 10832.5 389.516   3
  -4  -1 -14 11162.8 312.398   4
  -4   1 -14 11319.8 281.984   4
  -4  -1 -15 2284.01 158.093   3
  -4   1 -15 2277.69 150.229   3
  -4  -1 -15 2523.34 114.257   4
  -4  -1 -16 2003.00 102.322   4
  -4  -1 -16 1881.93 143.529   3
  -4   1 -16 1947.25 148.901   3
  -4   1 -17 437.648 77.2858   3
  -4  -1 -17 368.665 68.2492   3
  -4   1 -18 168.382 50.2993   3
  -4  -1 -18 223.653 51.0725   3
  -4   1 -19 431.402 72.7303   3
  -4  -1 -19 498.314 77.3464   3
  -4   1 -20 1175.01 128.007   3
  -4  -1 -20 1226.98 134.983   3
  -4  -1 -21 4058.84 263.266   3
  -4   1 -21 3790.01 248.888   3
  -4  -1 -22 1201.20 147.515   3
  -4   1 -22 1303.08 151.900   3
  -4  -1 -23 5688.27 337.972   3
   4  -2 -26 96.7664 31.6334   3
   4  -2 -25 1668.63 167.143   3
   4  -2 -24-9.59241 50.9990   3
   4  -2 -23-48.7996 35.4407   3
   4   2 -22 645.062 82.9395   3
   4  -2 -22 534.361 85.6191   3
   4   2 -21 3759.74 197.680   3
   4  -2 -21 3736.43 222.571   3
   4   2 -20 1145.05 102.742   3
   4  -2 -20 1112.92 114.407   3
   4   2 -19 5870.08 244.256   3
   4  -2 -19 5713.68 268.580   3
   4   2 -18 1842.09 121.198   3
   4  -2 -18 1604.46 129.878   3
   4   2 -17 11339.9 359.358   3
   4  -2 -17 11190.1 393.898   3
   4   2 -16 801.705 69.1634   3
  -4  -2  16 697.880 72.4562   2
   4  -2 -16 758.804 83.5676   3
   4   2 -15 16000.1 440.115   3
   4  -2 -15 15145.6 469.847   3
  -4  -2  15 15469.0 447.300   2
   4  -2 -14 4077.67 189.935   3
  -4  -2  14 4131.38 175.834   2
   4   2 -14 4278.00 171.136   3
   4   2 -13 172.999 33.2136   3
   4  -2 -13 173.166 40.5309   3
  -4  -2  13 242.585 41.4815   2
  -4  -2  13 137.341 18.0065   4
   4  -2 -12 1350.43 91.2877   5
  -4  -2  12 1309.74 85.7767   2
   4  -2 -11 13151.9 379.560   5
  -4  -2  11 13110.6 368.155   2
  -4   2  10 40.6996 27.0726   2
  -4  -2  10 47.9950 22.7615   2
  -4   2   9 18242.2 480.150   2
  -4  -2   9 18016.2 467.728   2
  -4   2   8 1150.78 86.4990   4
   4   2  -8 1858.79 96.2378   2
  -4   2   8 1494.21 91.1587   2
  -4  -2   8 1699.02 90.8782   2
   4   2  -7 58691.9 1292.72   2
  -4  -2   7 54579.6 1289.17   2
  -4   2   7 60779.7 1285.89   4
  -4   2   7 53825.5 1285.50   2
   4  -2  -7 57170.9 1291.94   2
  -4  -2   6 1566.37 85.7397   2
  -4   2   6 1369.07 74.5226   2
   4   2  -6 1153.65 65.2043   5
   4   2  -6 1501.49 80.0947   2
   4  -2  -6 1276.65 77.0215   2
  -4  -2   5 88931.7 1946.86   2
   4   2  -5 87216.3 1912.81   3
  -4   2   5 84918.2 1928.54   2
   4   2  -5 93911.9 1954.91   2
   4  -2  -5 93269.9 1934.56   2
   4  -2  -4 25.6384 16.7760   2
  -4  -2   4 20.1341 24.9046   2
  -4   2   4 39.5937 17.2761   2
   4   2  -4 7.87525 18.1785   3
   4   2  -4 48.3109 19.6792   2
   4   2  -3 68954.7 1470.56   2
  -4   2   3 67465.4 1442.65   1
  -4   2   3 63637.8 1440.99   2
  -4  -2   3 64260.9 1469.32   2
   4  -2  -3 68720.8 1443.87   2
   4   2  -3 65463.9 1449.62   3
  -4  -2   3 66608.2 1448.19   3
   4  -2  -2 785.428 54.2946   3
   4   2  -2 769.159 61.5769   2
  -4  -2   2 505.066 53.6578   3
  -4   2   2 859.668 48.1396   2
  -4   2   2 930.593 50.8772   1
   4  -2  -2 705.208 48.1912   2
   4   2  -2 763.573 52.5341   3
  -4  -2   2 833.571 58.6577   2
  -4  -2   1 13523.5 343.882   2
   4  -2  -1 12620.0 311.547   2
   4  -2  -1 13115.3 322.531   1
   4   2  -1 11346.7 335.591   2
   4  -2  -1 13087.5 325.434   3
   4   2  -1 12055.0 333.279   3
  -4  -2   1 13115.0 343.232   3
  -4   2   1 13338.0 315.163   2
   4   2   0 114.710 23.6746   3
  -4   2   0 102.379 19.5326   2
   4   2   0 76.1848 22.1788   2
   4  -2   0 74.8691 21.0944   1
   4  -2   0 119.095 28.7552   3
  -4  -2   0 91.5620 24.0628   2
   4  -2   0 104.461 19.9275   2
  -4  -2   0 120.878 25.1910   3
  -4   2   0 110.224 24.4329   3
   4   2   1 1656.30 79.3170   3
  -4   2  -1 1514.48 63.7060   2
  -4  -2  -1 1709.46 78.5231   2
   4  -2   1 1555.83 65.0901   2
  -4   2  -1 1565.68 80.7568   3
   4  -2   1 1636.86 84.9212   3
  -4  -2  -1 1718.84 85.1624   3
   4   2   2 1758.44 78.9132   3
  -4   2  -2 1517.55 61.6858   2
   4  -2   2 1573.09 83.8048   3
  -4  -2  -2 1558.34 79.7526   3
  -4  -2  -2 1573.65 77.1009   2
  -4   2  -2 1700.39 84.5963   3
   4  -2   2 1512.78 61.1613   2
   4   2   3 23760.9 544.590   3
  -4   2  -3 21048.4 507.442   2
  -4   2  -3 23626.6 561.896   3
   4  -2   3 23193.1 545.865   3
  -4  -2  -3 23195.2 552.801   3
  -4  -2  -4 7736.01 238.910   3
   4  -2   4 8033.54 228.918   3
  -4   2  -4 7571.39 239.932   3
   4   2   4 7871.08 232.646   3
  -4   2  -4 7765.82 198.192   2
   4  -2   5 26732.7 627.661   3
  -4   2  -5 26739.8 591.264   2
  -4   2  -5 26342.8 641.812   3
  -4  -2  -5 25884.3 645.730   3
  -4  -2  -6 3573.89 148.903   3
  -4   2  -6 3451.43 105.197   2
   4  -2   6 3699.85 135.993   3
  -4   2  -6 3712.17 147.754   3
   4  -2   7 15429.0 383.332   3
  -4  -2  -7 13660.9 403.305   3
  -4   2  -7 14540.7 340.228   2
  -4   2  -7 14229.9 396.509   3
  -4  -2  -8 95.8753 21.3513   3
  -4   2  -8 92.7874 15.9438   2
  -4   2  -8 86.5095 27.9599   3
  -4  -2  -9 5944.33 226.553   3
  -4   2  -9 5953.00 217.020   3
  -4  -2 -10 2317.37 135.258   3
  -4   2 -10 2833.17 95.9384   2
  -4   2 -10 2366.76 129.146   3
  -4  -2 -11 36.9847 19.6789   3
  -4   2 -11 38.5618 11.1058   4
  -4   2 -11 45.1357 29.8691   3
  -4   2 -11 26.5504 7.45442   2
  -4  -2 -12 224.818 40.0085   3
  -4   2 -12 236.013 20.5199   4
  -4   2 -12 297.857 56.3032   3
  -4   2 -12 298.681 25.4793   2
  -4  -2 -13 4074.58 203.597   3
  -4   2 -13 4015.99 189.861   3
  -4   2 -14 77.9299 29.3497   3
  -4  -2 -14 46.4814 26.1504   3
  -4  -2 -14 154.141 29.3104   4
  -4  -2 -15 8588.06 350.232   3
  -4   2 -15 8612.88 327.781   3
  -4  -2 -15 9171.73 282.069   4
  -4  -2 -16 1492.51 139.005   3
  -4   2 -16 1492.22 124.578   3
  -4  -2 -16 1595.05 96.2410   4
  -4  -2 -17 8752.78 376.835   3
  -4  -2 -17 9580.63 298.297   4
  -4   2 -17 8888.64 354.759   3
  -4  -2 -18 1368.71 140.457   3
  -4   2 -18 1451.29 131.604   3
  -4  -2 -19 7236.08 353.970   3
  -4   2 -19 7995.97 344.756   3
  -4  -2 -20 678.706 106.343   3
  -4   2 -20 711.518 111.605   3
  -4   2 -21 919.581 115.776   3
  -4  -2 -21 823.091 126.069   3
  -4  -2 -22 658.802 119.544   3
  -4  -2 -23 1178.60 147.994   3
   4  -3 -25 4310.59 281.702   3
   4  -3 -24 4398.72 276.265   3
   4  -3 -23 4754.52 276.511   3
   4  -3 -22 7500.35 351.545   3
   4   3 -21 5195.01 231.896   3
   4  -3 -21 4237.59 254.144   3
   4   3 -20 3645.06 182.020   3
   4  -3 -20 3354.55 211.742   3
   4   3 -19 4234.70 191.399   3
   4  -3 -19 3948.87 223.620   3
   4   3 -18 43.9475 26.1476   3
   4  -3 -18 37.5315 28.7188   3
   4   3 -17 247.714 39.1047   3
  -4  -3  17 250.926 45.1273   2
   4  -3 -17 245.195 62.0367   3
  -4  -3  16 5617.76 224.082   2
   4   3 -16 5768.85 215.360   3
   4  -3 -16 5587.74 250.812   3
   4   3 -15 52.0514 16.0801   3
   4  -3 -15 102.427 22.7183   3
  -4  -3  15 54.6908 24.5983   2
   4  -3 -14 11104.0 376.666   3
   4   3 -14 11107.7 328.978   3
  -4  -3  14 12816.0 322.815   4
  -4  -3  14 10812.7 347.034   2
   4   3 -13 36.9351 19.3339   3
  -4  -3  13 39.3198 27.7142   2
   4  -3 -13 47.0230 21.9354   3
  -4  -3  12 29162.8 712.718   2
   4  -3 -12 28882.6 730.510   5
  -4  -3  11 6033.38 211.132   2
  -4  -3  10 23902.6 597.473   2
  -4  -3   9 1515.51 88.3529   2
  -4  -3   8 19831.8 511.406   2
  -4   3   8 19364.9 509.234   2
   4   3  -8 21574.5 528.538   2
  -4  -3   7 29.7031 22.8109   2
   4   3  -7 32.6653 15.2189   2
  -4   3   7 42.9901 22.2720   2
   4   3  -7 39.4420 16.0959   3
  -4   3   6 1287.45 74.9661   2
   4  -3  -6 1457.73 79.1369   2
  -4  -3   6 1419.92 84.0649   2
  -4   3   6 1238.16 75.7467   4
   4   3  -6 1120.59 64.3400   3
   4   3  -6 1403.35 87.6418   2
  -4  -3   5 962.985 69.0851   2
   4  -3  -5 1035.67 61.8439   2
   4   3  -5 971.528 54.2642   3
  -4   3   5 997.578 65.5279   4
  -4   3   5 968.951 64.5087   2
   4   3  -5 1223.96 77.4488   2
  -4   3   4 36731.2 802.314   4
   4   3  -4 36031.3 818.703   2
  -4  -3   4 32263.6 817.326   2
  -4   3   4 34309.3 791.976   2
   4  -3  -4 37331.7 794.657   2
   4   3  -4 31597.4 793.357   3
   4   3  -4 32710.9 767.533   5
  -4   3   3 523.407 39.5150   2
  -4   3   3 527.471 44.9140   1
   4   3  -3 568.926 52.1126   2
  -4  -3   3 419.972 41.1185   3
   4   3  -3 563.230 44.0094   3
  -4  -3   3 506.931 49.7232   2
   4  -3  -3 629.120 45.0824   2
   4   3  -2 17446.9 426.943   2
  -4  -3   2 15762.2 431.102   2
   4   3  -2 15808.7 407.645   3
  -4   3   2 16407.3 411.395   1
  -4   3   2 16678.9 400.048   2
  -4  -3   2 16798.6 420.383   3
   4  -3  -2 17630.8 402.820   2
   4   3  -1 24278.5 558.169   2
  -4  -3   1 22968.9 559.611   2
   4  -3  -1 23306.9 547.065   1
  -4   3   1 21817.9 547.472   1
   4  -3  -1 23294.2 545.013   3
   4  -3  -1 22393.1 529.501   2
  -4   3   1 23114.8 528.395   2
  -4  -3   1 23209.6 556.140   3
   4   3  -1 23923.8 544.337   3
   4  -3   0 26213.2 580.498   2
   4  -3   0 25193.6 603.986   1
  -4  -3   0 25530.7 611.575   2
   4   3   0 25818.3 598.455   3
   4  -3   0 25671.5 599.928   3
  -4   3   0 25593.4 576.819   2
  -4  -3   0 25943.9 611.854   3
   4  -3   1 5438.63 150.939   2
   4   3   1 5746.69 173.318   3
   4  -3   1 6196.44 184.716   3
  -4  -3  -1 5718.47 181.131   2
  -4   3  -1 5846.77 180.988   3
  -4   3  -1 5467.70 149.728   2
  -4  -3  -1 5724.19 182.226   3
   4  -3   1 5621.97 181.999   1
   4   3   2 49820.7 1107.82   3
   4  -3   2 46961.6 1071.54   2
  -4   3  -2 49236.2 1120.30   3
   4  -3   2 51054.8 1117.14   3
  -4   3  -2 47035.9 1066.19   2
  -4  -3  -2 46118.9 1113.89   3
   4   3   3 1053.00 65.4081   3
   4  -3   3 956.806 40.6120   2
  -4   3  -3 963.352 68.2226   3
  -4  -3  -3 1056.51 68.0509   3
  -4   3  -3 1064.73 40.3923   2
   4  -3   3 996.778 64.0037   3
  -4  -3  -4 4610.64 169.404   3
  -4   3  -4 4674.92 117.195   2
  -4   3  -4 4847.61 172.809   3
   4  -3   4 4698.62 159.148   3
   4  -3   5 629.852 49.4045   3
  -4   3  -5 645.452 57.3077   3
  -4   3  -5 565.857 25.8039   2
  -4  -3  -5 585.167 52.5063   3
  -4  -3  -6 2692.81 126.442   3
   4  -3   6 2937.73 110.980   3
  -4   3  -6 2194.12 66.1135   2
  -4   3  -6 2633.32 118.245   3
   4  -3   7 4335.21 146.544   3
  -4   3  -7 3637.84 99.1196   2
  -4  -3  -7 4076.74 166.745   3
  -4   3  -7 4075.97 156.923   3
  -4  -3  -8 8068.64 247.052   3
  -4   3  -8 6793.33 148.702   2
  -4   3  -8 8202.92 232.032   3
  -4  -3  -9 7632.11 262.663   3
  -4   3  -9 7881.91 250.928   3
  -4   3  -9 7353.42 172.647   2
  -4   3  -9 6351.73 166.349   2
  -4  -3 -10 12127.5 390.127   3
  -4   3 -10 12725.6 293.339   2
  -4   3 -10 12037.3 367.407   3
  -4   3 -10 12577.8 289.218   2
  -4  -3 -11 7360.86 287.427   3
  -4   3 -11 8201.82 200.670   2
  -4   3 -11 7842.55 197.587   2
  -4   3 -11 7585.19 269.296   3
  -4  -3 -12 15535.2 507.262   3
  -4   3 -12 18087.7 403.964   2
  -4   3 -12 17193.0 400.799   2
  -4   3 -12 16132.0 483.332   3
  -4  -3 -13 7014.67 294.212   3
  -4   3 -13 7338.47 272.176   3
  -4  -3 -14 8242.75 331.536   3
  -4   3 -14 8118.85 304.901   3
  -4  -3 -14 8805.49 286.758   4
  -4  -3 -15 5150.35 258.404   3
  -4  -3 -15 5511.74 210.985   4
  -4   3 -15 5193.00 233.819   3
  -4  -3 -16 110.686 52.6672   3
  -4  -3 -16 121.440 20.4891   4
  -4   3 -16 132.398 35.0445   3
  -4  -3 -17 488.220 92.1772   3
  -4   3 -17 611.695 86.4072   3
  -4  -3 -17 539.820 62.8326   4
  -4  -3 -18 2569.18 199.301   3
  -4   3 -18 2665.95 175.768   3
  -4  -3 -19 360.447 84.1106   3
  -4   3 -19 410.858 79.9757   3
  -4   3 -20 6673.28 315.238   3
  -4  -3 -20 6544.77 347.431   3
  -4  -3 -21 742.917 107.011   3
  -4  -3 -22 6347.84 365.177   3
   4  -4 -24 172.892 30.8930   3
   4  -4 -23-32.2000 28.3845   3
   4  -4 -22 596.953 90.0449   3
   4  -4 -21 217.929 59.0997   3
   4   4 -20 6468.87 249.491   3
   4  -4 -20 5427.42 286.855   3
   4   4 -19 4638.22 197.567   3
   4  -4 -19 4604.80 249.508   3
   4   4 -18 7452.80 257.180   3
   4  -4 -18 6580.96 304.834   3
   4   4 -17 6821.13 237.096   3
   4  -4 -17 6296.99 286.787   3
  -4  -4  17 6652.01 251.309   2
   4   4 -16 12345.6 355.102   3
   4  -4 -16 11597.5 417.550   3
  -4  -4  16 12632.1 378.238   2
   4   4 -15 3029.26 133.287   3
   4  -4 -15 2919.98 170.646   3
  -4  -4  15 3042.41 147.312   2
  -4  -4  14 8143.09 274.165   2
   4  -4 -14 8051.98 305.003   3
   4   4 -14 8265.73 250.390   3
   4   4 -13 3658.86 140.089   3
   4  -4 -13 3703.21 182.949   3
   4  -4 -13 4026.95 179.380   5
  -4  -4  13 3499.63 157.767   2
   4  -4 -12 177.649 36.4083   5
   4   4 -12 94.2809 20.3092   3
  -4  -4  12 84.0023 38.4598   2
  -4  -4  11 303.777 42.8361   2
  -4  -4  10 14593.4 401.375   2
  -4  -4   9 80.1921 18.0627   2
  -4  -4   8 54438.4 1171.20   2
   4   4  -8 50596.4 1111.40   3
   4   4  -7 245.596 28.7958   3
   4   4  -7 298.218 47.5925   2
  -4  -4   7 235.151 41.5593   2
   4   4  -6 24418.5 606.819   2
  -4  -4   6 23599.7 607.677   2
   4   4  -6 24766.8 568.068   3
   4   4  -5 2325.08 114.595   2
  -4  -4   5 2289.49 117.512   2
  -4   4   5 2460.00 105.763   4
   4  -4  -5 2434.19 105.835   2
   4   4  -5 2067.98 96.0755   3
   4   4  -4 23541.9 607.965   2
  -4   4   4 24359.0 582.328   2
  -4   4   4 26783.7 591.385   4
  -4  -4   4 24221.0 568.409   3
  -4  -4   4 24519.3 617.290   2
   4  -4  -4 25362.3 584.151   2
   4   4  -4 23436.4 571.792   3
  -4  -4   3 109.763 25.9418   2
  -4   4   3 80.0359 20.7500   1
   4   4  -3 55.2867 22.2076   2
  -4   4   3 69.8724 18.0450   2
  -4   4   3 82.1986 22.8498   4
   4   4  -3 99.0250 20.4493   3
  -4  -4   3 86.8506 26.6929   3
   4  -4  -3 85.9809 19.0712   2
   4   4  -2 41095.7 918.139   3
  -4  -4   2 41476.2 938.992   3
  -4  -4   2 39439.2 949.999   2
  -4   4   2 41582.5 942.527   1
  -4   4   2 40749.0 918.429   2
  -4   4   2 42354.5 927.116   4
   4  -4  -2 41809.3 918.385   2
   4   4  -1 2687.71 105.512   3
  -4  -4   1 2744.24 109.740   3
  -4  -4   1 2806.91 119.000   2
  -4   4   1 2804.23 115.445   1
  -4   4   1 2813.68 98.6651   2
   4  -4  -1 2824.88 98.7290   2
  -4   4   1 2931.14 106.217   4
   4   4   0 4773.17 152.677   3
   4  -4   0 4485.39 162.113   1
  -4   4   0 4782.62 138.149   2
  -4   4   0 4696.01 147.817   4
  -4  -4   0 4684.16 166.921   2
   4  -4   0 4855.70 154.702   3
  -4  -4   0 4941.62 162.092   3
   4  -4   0 4903.98 139.517   2
  -4  -4  -1 411.698 39.7269   3
   4   4   1 520.217 42.2767   3
  -4   4  -1 453.046 36.6927   4
   4  -4   1 391.540 44.6778   1
  -4   4  -1 419.878 28.7666   2
  -4  -4  -1 500.861 48.8698   2
   4  -4   1 443.537 39.5045   3
   4  -4   1 450.525 29.8941   2
  -4  -4  -2 91.5064 22.5855   3
   4   4   2 147.300 25.7541   3
   4  -4   2 48.5405 24.0325   1
   4  -4   2 154.513 15.1466   2
  -4   4  -2 277.400 25.8248   4
   4  -4   2 157.399 26.7185   3
  -4  -4  -3 743.278 59.5321   3
   4   4   3 847.756 57.6996   3
   4  -4   3 593.388 30.7618   2
  -4   4  -3 752.416 54.9646   3
   4  -4   3 677.374 52.8568   3
  -4  -4  -4 58660.7 1353.87   3
   4  -4   4 60812.4 1332.34   3
  -4   4  -4 57722.2 1292.75   4
  -4   4  -4 57314.0 1340.07   3
   4  -4   5 9277.32 253.293   3
  -4  -4  -5 8493.86 273.688   3
  -4   4  -5 9061.14 267.538   3
  -4   4  -5 8689.74 217.278   4
   4  -4   6 28011.5 637.840   3
  -4  -4  -6 25850.3 668.342   3
  -4   4  -6 27564.1 661.702   3
  -4   4  -6 26552.1 589.053   4
  -4  -4  -7 3166.75 149.164   3
   4  -4   7 3561.25 127.059   3
  -4   4  -7 2953.63 85.6839   4
  -4   4  -7 3270.43 141.339   3
  -4  -4  -8 12013.3 369.576   3
   4  -4   8 12614.6 327.272   3
  -4   4  -8 11355.2 343.477   3
  -4  -4  -9 2878.95 152.600   3
  -4   4  -9 2806.93 133.785   3
  -4  -4 -10 1988.67 130.006   3
  -4   4 -10 2016.31 111.925   3
  -4  -4 -11 6.10426 18.9331   3
  -4   4 -11 7.96203 17.5001   3
  -4  -4 -12 1179.93 106.483   3
  -4   4 -12 1123.73 88.0141   3
  -4  -4 -13 1308.17 119.822   3
  -4   4 -13 1342.78 98.3571   3
  -4  -4 -14 2908.19 180.716   3
  -4  -4 -14 2983.47 154.826   4
  -4   4 -14 2642.82 151.719   3
  -4  -4 -15 2918.62 190.015   3
  -4   4 -15 2792.67 161.673   3
  -4  -4 -15 3051.58 159.366   4
  -4  -4 -16 8319.62 367.864   3
  -4  -4 -16 9112.22 312.999   4
  -4   4 -16 8762.82 330.684   3
  -4  -4 -17 1131.78 127.009   3
  -4   4 -17 1343.10 114.045   3
  -4  -4 -17 1200.37 100.651   4
  -4  -4 -18 8572.24 400.596   3
  -4  -4 -18 9775.53 335.745   4
  -4   4 -18 9340.91 360.549   3
  -4  -4 -19 1904.46 174.336   3
  -4   4 -19 1892.21 147.746   3
  -4  -4 -20 1119.03 147.087   3
  -4  -4 -21 1056.16 148.110   3
  -4  -4 -22-32.5655 65.4777   3
   4  -5 -24 1298.23 157.375   3
   4  -5 -23 5388.59 317.224   3
   4  -5 -22 2739.64 217.424   3
   4  -5 -21 4140.53 257.792   3
   4  -5 -20 866.696 112.430   3
   4  -5 -19 1050.63 115.788   3
   4   5 -18 1412.68 91.6152   3
   4  -5 -18 1255.65 119.712   3
  -4  -5  18 1481.04 108.174   2
   4   5 -17 1108.66 76.8256   3
  -4  -5  17 1076.91 92.4269   2
   4  -5 -17 1059.36 105.773   3
   4  -5 -16 67.3465 40.0685   3
   4   5 -16 164.150 31.6066   3
  -4  -5  16 129.379 28.4666   2
   4   5 -15 8037.05 243.987   3
   4  -5 -15 7860.39 317.598   3
  -4  -5  15 8151.51 274.199   2
  -4  -5  14 256.003 42.1437   2
   4  -5 -14 288.052 45.2817   5
   4  -5 -14 300.121 52.6508   3
   4   5 -14 279.014 36.6821   3
   4  -5 -13 16083.7 466.320   5
  -4  -5  13 16571.4 445.935   2
   4   5 -13 15770.8 401.480   3
   4  -5 -13 15584.2 482.151   3
   4   5 -12 4042.57 135.747   3
   4  -5 -12 3692.36 185.431   3
  -4  -5  12 4044.67 167.987   2
  -4  -5  11 35126.5 843.318   2
   4   5 -10 2428.49 92.9841   3
  -4  -5  10 2372.60 120.618   2
  -4  -5   9 5882.23 242.267   2
   4   5  -9 9066.54 220.613   3
  -4  -5   8 30.5554 11.3598   1
  -4  -5   8 27.5072 26.4735   2
   4   5  -8 19.0210 15.7390   3
  -4  -5   7 7060.87 173.934   1
   4   5  -7 7564.45 207.299   3
  -4  -5   7 7388.61 246.093   2
   4   5  -6 708.852 64.4465   2
  -4  -5   6 648.630 65.8296   2
   4   5  -6 687.798 42.3751   3
  -4  -5   5 3725.51 163.954   2
   4   5  -5 3720.46 157.550   2
   4   5  -5 3588.57 120.561   3
  -4  -5   4 1436.07 70.7636   3
   4   5  -4 1444.38 65.8511   3
   4  -5  -4 1619.24 80.4922   2
   4   5  -4 1627.92 94.2420   2
  -4  -5   4 1405.68 95.7752   2
  -4  -5   3 43857.2 1050.58   2
   4   5  -3 44953.2 997.710   3
  -4   5   3 45127.1 1043.15   1
   4   5  -3 42966.4 969.907   1
  -4   5   3 46417.7 1023.65   4
   4  -5  -3 47171.2 1016.16   2
  -4  -5   3 45164.9 1020.54   3
  -4   5   2 60.4826 21.5619   4
   4   5  -2 49.8148 12.7612   3
   4  -5  -2 94.7923 20.9816   2
  -4  -5   2 47.0704 20.5341   2
  -4  -5   2 106.202 22.2325   3
  -4   5   2 86.6727 24.8115   1
  -4   5   1 65726.4 1432.01   4
   4   5  -1 64219.5 1422.62   3
  -4  -5   1 63215.2 1461.74   2
  -4   5   1 66029.0 1459.75   1
   4  -5  -1 66291.0 1417.98   2
  -4  -5   1 69234.3 1445.00   3
   4   5   0 16600.1 409.744   3
  -4   5   0 16552.0 435.983   1
  -4   5   0 17244.2 408.733   4
  -4  -5   0 15965.5 433.791   2
   4  -5   0 17185.5 417.019   3
   4  -5   0 16684.7 394.708   2
  -4  -5   0 16063.8 420.661   3
   4   5   1 30802.6 698.607   3
   4  -5   1 30412.1 696.592   3
   4  -5   1 30089.4 668.833   2
  -4  -5  -1 29659.4 709.725   3
  -4   5  -1 29499.6 683.443   4
   4   5   2 561.494 43.5048   3
  -4   5  -2 461.289 37.5181   4
  -4  -5  -2 447.194 45.8354   3
   4  -5   2 500.961 47.0607   3
   4  -5   2 454.590 29.0951   2
  -4  -5  -3 22665.4 538.380   3
   4  -5   3 24317.7 526.405   3
  -4   5  -3 22333.7 488.287   4
   4  -5   4 2211.48 99.6479   3
  -4   5  -4 1984.23 75.4361   4
  -4   5  -4 2037.92 98.3303   3
  -4  -5  -4 2086.58 108.868   3
   4  -5   5 6767.81 202.106   3
  -4  -5  -5 6389.32 225.222   3
  -4   5  -5 6410.02 170.259   4
  -4   5  -5 6454.97 208.424   3
   4  -5   6 708.067 50.2022   3
  -4  -5  -6 596.169 62.7082   3
  -4   5  -6 637.546 32.8018   4
  -4   5  -6 598.458 54.6424   3
  -4  -5  -7 110.119 29.8905   3
   4  -5   7 93.0245 21.1272   3
  -4   5  -7 138.446 36.6625   3
  -4  -5  -8 5558.50 227.770   3
  -4   5  -8 6237.84 215.421   3
   4  -5   8 6165.40 189.960   3
  -4  -5  -9 6007.82 243.272   3
   4  -5   9 6166.32 191.802   3
  -4   5  -9 5941.75 216.616   3
  -4  -5 -10 15449.8 470.908   3
  -4   5 -10 15216.2 427.853   3
  -4  -5 -11 18882.7 554.384   3
  -4   5 -11 18149.7 498.457   3
  -4  -5 -12 5243.62 246.815   3
  -4   5 -12 5049.14 203.660   3
  -4  -5 -13 10483.3 385.565   3
  -4   5 -13 9782.21 323.706   3
  -4  -5 -14 4913.77 253.635   3
  -4  -5 -14 4924.09 219.810   4
  -4   5 -14 4479.42 201.684   3
  -4  -5 -15 611.630 88.6675   3
  -4   5 -15 508.263 60.1571   3
  -4  -5 -15 590.584 71.9136   4
  -4  -5 -16 459.564 87.2888   3
  -4  -5 -16 547.719 74.7057   4
  -4   5 -16 536.613 71.0751   3
  -4  -5 -17 128.077 38.3502   3
  -4  -5 -17 137.047 37.3080   4
  -4   5 -17 121.866 46.2567   3
  -4  -5 -18 234.838 51.2296   3
  -4  -5 -18 149.010 44.3767   4
  -4  -5 -19 4265.32 286.895   3
  -4  -5 -20 943.516 140.586   3
  -4  -5 -21 8013.21 420.525   3
   4  -6 -23 349.587 87.7041   3
   4  -6 -22 42.4248 55.4659   3
   4  -6 -21 2338.82 195.729   3
   4  -6 -20 3864.69 243.264   3
   4  -6 -19 8335.42 368.114   3
   4  -6 -18 9124.61 386.664   3
  -4  -6  18 9969.10 327.475   2
   4  -6 -17 9993.67 398.360   3
  -4  -6  17 10925.0 341.979   2
   4   6 -16 3519.23 132.778   3
   4  -6 -16 2985.72 190.038   3
  -4  -6  16 3570.19 164.116   2
  -4  -6  15 12977.8 389.021   2
   4   6 -15 13928.5 348.639   3
   4  -6 -15 12317.1 442.554   3
   4  -6 -14 1701.49 119.824   5
   4   6 -14 1696.39 78.8700   3
   4  -6 -14 1517.59 122.185   3
  -4  -6  14 1698.72 103.605   2
   4  -6 -13 2532.15 141.067   5
   4  -6 -13 2311.86 145.286   3
   4   6 -13 2418.87 94.2392   3
   4   6 -13 2374.37 95.1690   3
  -4  -6  13 2357.26 123.212   2
   4   6 -12 4015.79 128.853   3
  -4  -6  12 4006.46 170.168   2
   4  -6 -12 4130.98 197.509   3
   4   6 -12 4363.03 135.243   3
   4   6 -11 721.282 45.5851   3
  -4  -6  11 596.050 56.9580   2
   4   6 -11 643.153 39.1186   3
  -4  -6  10 261.657 27.4418   1
  -4  -6  10 286.433 43.2753   2
   4   6 -10 271.410 28.4142   3
  -4  -6   9 7402.14 249.563   2
  -4  -6   9 7342.94 190.048   1
   4   6  -9 6949.70 200.107   3
  -4  -6   8 215.269 21.2681   1
  -4  -6   8 240.583 48.9108   2
   4   6  -8 238.010 21.4005   3
   4   6  -7 26696.4 594.582   3
  -4  -6   7 25628.6 670.103   2
  -4  -6   6 4274.74 182.854   2
   4   6  -6 4328.92 125.961   3
   4   6  -5 19235.0 448.908   3
  -4  -6   5 20519.7 535.801   2
   4   6  -4 1023.24 51.6054   3
  -4  -6   4 1011.81 78.9255   2
  -4  -6   4 1115.87 62.1590   3
  -4  -6   3 15334.5 427.616   2
   4   6  -3 14902.0 372.521   3
  -4   6   3 15075.5 426.421   1
   4   6  -3 15821.1 362.762   1
   4  -6  -3 17066.2 403.257   2
  -4  -6   3 15641.7 400.826   3
   4   6  -2 3561.96 119.411   3
  -4  -6   2 3481.39 150.320   2
  -4   6   2 3521.99 151.370   1
  -4  -6   2 3485.84 131.237   3
   4  -6  -2 3769.77 129.121   2
   4   6  -1 72.6616 18.1465   3
  -4  -6   1 94.9125 33.5701   2
  -4  -6   1 83.4731 24.8100   3
  -4   6   1 49.0466 20.5928   4
   4  -6  -1 78.4927 17.2748   2
  -4   6   1 34.1889 32.9997   1
  -4   6   0 21.6826 22.0689   1
   4   6   0 39.3004 15.1612   3
  -4   6   0 60.1602 18.8880   4
  -4  -6   0 71.0499 19.2137   3
   4  -6   0 62.3444 17.2981   2
   4  -6   0 89.6181 24.0712   3
  -4  -6   0 84.0481 25.2344   2
  -4  -6  -1 2720.90 120.917   3
  -4   6  -1 2739.05 106.393   4
   4   6   1 2800.21 110.595   3
   4  -6   1 2896.14 111.940   3
   4  -6   1 2722.45 94.3995   2
  -4  -6  -2 3239.05 138.324   3
  -4   6  -2 3268.64 116.281   4
   4  -6   2 3351.65 102.462   2
   4  -6   2 3275.43 127.048   3
   4  -6   3 17606.1 403.577   2
  -4   6  -3 17504.0 427.881   4
  -4  -6  -3 18320.2 475.191   3
   4  -6   3 19273.2 459.863   3
  -4   6  -4 17205.6 229.197   4
  -4  -6  -4 16910.9 314.863   3
   4  -6   4 17970.4 286.189   3
  -4  -6  -5 20390.1 546.928   3
   4  -6   5 21120.4 507.325   3
  -4  -6  -6 9519.48 312.819   3
  -4   6  -6 9997.99 284.654   3
   4  -6   6 9914.25 271.393   3
  -4  -6  -7 20716.9 562.462   3
   4  -6   7 21107.1 497.146   3
  -4   6  -7 19701.8 514.772   3
   4  -6   8 1773.98 81.7150   3
  -4  -6  -8 1636.69 116.583   3
  -4   6  -8 1728.08 94.5343   3
  -4  -6  -9 10033.0 344.191   3
   4  -6   9 9859.94 272.781   3
  -4   6  -9 9886.20 299.372   3
  -4  -6 -10 222.910 42.7702   3
  -4   6 -10 308.078 44.5866   3
  -4  -6 -11 19.6117 23.1304   3
  -4   6 -11 34.8035 25.7539   3
  -4  -6 -12 796.419 93.6247   3
  -4   6 -12 766.086 72.7929   3
  -4  -6 -13 3178.18 195.159   3
  -4   6 -13 3213.14 157.735   3
  -4  -6 -14 4781.77 257.667   3
  -4  -6 -14 5202.96 234.912   4
  -4   6 -14 4483.96 200.175   3
  -4  -6 -15 3578.17 227.255   3
  -4  -6 -15 4139.07 209.050   4
  -4   6 -15 3685.78 181.755   3
  -4  -6 -16 4377.54 259.760   3
  -4  -6 -16 4537.35 223.589   4
  -4  -6 -17 12560.6 512.227   3
  -4  -6 -17 13962.2 458.779   4
  -4  -6 -18 5780.64 327.779   3
  -4  -6 -18 6250.64 277.815   4
  -4  -6 -19 6356.84 360.853   3
  -4  -6 -19 6799.08 297.982   4
  -4  -6 -20 3647.95 272.657   3
   4  -7 -22 11437.2 491.837   3
   4  -7 -21 776.159 117.938   3
   4  -7 -20 1684.79 161.147   3
   4  -7 -19 394.158 78.2642   3
   4  -7 -18 195.179 48.7158   3
  -4  -7  18 295.400 49.7909   2
   4  -7 -17 3.68802 28.7665   3
  -4  -7  17-14.4128 16.9781   2
   4  -7 -16 4521.01 244.981   3
  -4  -7  16 4623.15 194.554   2
  -4  -7  15 776.952 73.8518   2
   4  -7 -15 722.934 92.3892   3
   4   7 -14 9465.15 242.664   3
  -4  -7  14 9761.86 305.849   2
   4  -7 -14 9414.85 358.105   3
   4  -7 -14 9645.13 333.686   5
   4   7 -13 11.2181 11.1504   3
   4  -7 -13-20.3656 18.6889   3
  -4  -7  13 33.6985 31.3951   2
   4   7 -12 20010.0 427.721   3
  -4  -7  12 19884.9 514.471   2
   4  -7 -12 19456.9 562.158   3
   4   7 -12 17193.1 437.063   3
  -4  -7  12 19118.3 464.328   1
  -4  -7  11 1599.24 102.315   2
   4   7 -11 1333.98 49.8876   3
   4  -7 -11 1498.51 113.054   3
  -4  -7  11 1711.34 73.8060   1
   4   7 -11 1439.91 56.6093   3
  -4  -7  10 19818.1 479.550   2
  -4  -7  10 21142.1 406.388   1
  -4  -7   9 631.755 69.2785   2
  -4  -7   9 617.991 40.3476   1
  -4  -7   8 8456.16 290.677   2
  -4  -7   7 149.806 40.8124   2
   4   7  -7 137.926 14.6977   3
   4   7  -6 640.354 34.1213   3
  -4  -7   6 726.517 49.8870   5
  -4  -7   6 765.980 77.6321   2
  -4  -7   5 209.746 27.5309   3
  -4  -7   5 206.096 46.5133   2
   4   7  -5 192.963 20.6597   3
  -4   7   4 11984.5 360.897   1
  -4  -7   4 12027.5 312.753   3
   4   7  -4 11844.3 292.512   1
   4   7  -4 11762.9 290.711   3
  -4  -7   4 12031.5 364.373   2
   4   7  -3 134.941 19.1831   3
  -4   7   3 161.299 35.1526   1
  -4  -7   3 147.835 37.5138   2
   4   7  -3 125.379 22.2001   1
  -4  -7   3 131.058 31.0457   3
   4   7  -2 44144.8 999.621   3
  -4  -7   2 42768.2 1061.26   2
  -4   7   2 45172.8 1067.75   1
  -4  -7   2 44591.8 1025.88   3
  -4  -7   1 2420.55 125.611   2
   4   7  -1 2439.49 99.8517   3
  -4   7   1 2586.07 128.995   1
   4  -7  -1 2660.06 103.833   2
  -4  -7   1 2572.50 111.633   3
  -4  -7   0 60732.0 1390.45   3
   4   7   0 63393.8 1375.50   3
  -4   7   0 58655.2 1423.96   1
   4  -7   0 64995.7 1368.13   2
  -4  -7   0 60374.7 1423.60   2
  -4  -7  -1 3326.06 141.447   3
   4  -7   1 3595.61 133.263   3
   4  -7   1 3429.55 115.877   2
   4  -7   2 43492.1 979.351   3
  -4  -7  -2 42528.8 1003.58   3
   4  -7   2 43317.1 945.486   2
  -4  -7  -3 152.611 32.3792   3
   4  -7   3 137.183 16.4364   2
   4  -7   3 76.1914 15.9529   3
  -4  -7  -4 15895.2 409.584   3
   4  -7   4 17145.2 378.478   3
  -4  -7  -5 98.1554 28.1511   3
   4  -7   5 27.2975 12.6707   3
  -4  -7  -6 1456.57 99.0321   3
   4  -7   6 1384.69 74.7150   3
   4  -7   7 211.711 27.6568   3
  -4  -7  -7 230.217 46.8805   3
  -4  -7  -8 209.728 42.1904   3
   4  -7   8 253.220 29.0388   3
  -4  -7  -9 4477.29 210.052   3
   4  -7   9 4192.69 146.953   3
  -4   7  -9 4431.54 164.766   3
  -4  -7 -10 12451.9 415.286   3
  -4   7 -10 11956.2 343.497   3
  -4  -7 -11 173.692 40.2003   3
  -4   7 -11 231.561 26.8117   3
  -4  -7 -12 5130.31 260.099   3
  -4   7 -12 5414.34 200.527   3
  -4   7 -13 718.107 67.0057   3
  -4  -7 -13 683.924 95.5593   3
  -4  -7 -14 1776.16 157.187   3
  -4   7 -14 1782.55 108.118   3
  -4  -7 -14 1858.34 144.606   4
  -4  -7 -15 247.613 74.5506   3
  -4  -7 -15 249.731 63.9747   4
  -4  -7 -16 66.9492 26.4688   3
  -4  -7 -16 34.1901 35.5466   4
  -4  -7 -17-53.4780 35.9555   3
  -4  -7 -17 47.6619 45.2640   4
  -4  -7 -18 1928.06 187.299   3
  -4  -7 -18 2106.24 162.422   4
  -4  -7 -19 47.8761 41.9942   3
  -4  -7 -19 99.6582 47.4064   4
  -4  -7 -20 7614.46 419.266   3
   4  -8 -22 759.321 121.445   3
   4  -8 -21 939.898 123.673   3
   4  -8 -20 4219.22 268.744   3
   4  -8 -19 4284.62 259.211   3
   4  -8 -18 10636.5 435.723   3
   4  -8 -17 12316.4 469.890   3
   4  -8 -16 9804.63 398.265   3
  -4  -8  16 10548.6 329.281   2
   4  -8 -15 7393.61 286.408   5
   4  -8 -15 6847.30 308.819   3
  -4  -8  15 7174.22 253.284   2
   4  -8 -14 3971.21 218.276   3
   4  -8 -14 4182.22 198.856   5
  -4  -8  14 4244.44 177.973   2
   4  -8 -13 5177.06 239.848   3
  -4  -8  13 4741.05 194.100   2
  -4  -8  12 2404.96 127.612   2
   4  -8 -12 2399.12 148.392   3
  -4  -8  11 46.8059 27.3211   2
   4  -8 -11 20.1607 31.5980   3
  -4  -8  11 46.6889 15.5697   1
  -4  -8  10 101.793 33.5902   2
   4  -8 -10 124.495 32.3296   3
  -4  -8   9 2853.58 151.031   2
  -4  -8   8 2928.71 152.075   2
  -4  -8   7 6425.31 252.018   2
   4   8  -6 11338.4 267.422   3
  -4  -8   6 11461.3 374.240   2
  -4  -8   6 12253.9 312.913   5
   4  -8  -6 10962.2 344.534   4
   4   8  -5 6671.93 171.387   3
   4  -8  -5 6048.78 226.815   4
  -4  -8   5 6476.71 249.507   2
  -4  -8   5 6847.50 198.448   5
  -4  -8   5 6427.15 182.814   3
  -4   8   4 5420.58 227.685   1
  -4  -8   4 5849.69 230.603   2
   4   8  -4 6359.30 182.238   1
   4   8  -4 6081.04 166.676   3
  -4  -8   4 6081.09 188.494   3
  -4   8   3 866.816 77.8072   1
  -4  -8   3 739.392 70.2621   2
   4   8  -3 740.924 44.7211   3
   4   8  -3 774.363 50.4732   1
  -4  -8   3 792.047 58.8692   3
  -4  -8   2 975.044 66.5963   3
   4   8  -2 960.795 54.7306   3
  -4  -8   2 1022.94 83.0388   2
  -4   8   2 1010.32 85.0397   1
   4   8  -1 580.406 43.8315   3
  -4  -8   1 487.758 62.4793   2
   4  -8  -1 692.343 49.8497   2
  -4   8   1 561.456 66.1584   1
  -4  -8   1 615.219 53.1236   3
   4  -8   0 11231.0 285.079   2
   4   8   0 10313.3 284.347   3
  -4   8   0 10141.7 332.745   1
  -4  -8   0 9561.91 328.132   2
  -4  -8   0 9863.19 297.880   3
   4  -8   1 4423.94 156.212   3
   4  -8   1 4407.17 143.930   2
  -4  -8  -1 4084.73 166.527   3
  -4  -8  -2 12261.3 360.906   3
   4  -8   2 12604.2 313.772   2
   4  -8   2 12637.8 339.061   3
  -4  -8  -3 12296.5 370.165   3
   4  -8   3 12801.5 347.532   3
   4  -8   3 12695.4 307.584   2
  -4  -8  -4 11983.2 359.710   3
   4  -8   4 11210.3 275.449   2
   4  -8   4 12594.3 326.593   3
  -4  -8  -5 9448.02 314.321   3
   4  -8   5 9526.42 266.369   3
   4  -8   6 14847.3 375.961   3
  -4  -8  -6 14638.5 439.815   3
  -4  -8  -7 13824.7 439.942   3
   4  -8   7 14853.6 364.357   3
  -4  -8  -8 15656.1 459.505   3
   4  -8   8 13745.0 359.998   3
  -4  -8  -9 1554.29 124.457   3
  -4  -8 -10 497.122 76.3960   3
  -4  -8 -11 45.8523 23.9287   3
  -4  -8 -12 2666.09 180.308   3
  -4   8 -12 2513.81 117.021   3
  -4  -8 -13 1586.69 147.433   3
  -4  -8 -13 1544.88 129.937   4
  -4  -8 -14 7034.08 340.720   3
  -4  -8 -14 7193.40 316.829   4
  -4  -8 -15 7152.17 349.786   3
  -4  -8 -15 7128.25 316.300   4
  -4  -8 -16 5363.93 309.443   3
  -4  -8 -16 5697.61 280.551   4
  -4  -8 -17 11552.9 496.981   3
  -4  -8 -17 11559.1 442.148   4
  -4  -8 -18 8786.97 439.918   3
  -4  -8 -18 10680.5 419.542   4
  -4  -8 -19 5151.21 278.800   4
  -4  -8 -19 4576.70 313.889   3
   4  -9 -21 3772.65 261.105   3
   4  -9 -20 17.9323 68.8881   3
   4  -9 -19 77.4911 33.2438   3
   4  -9 -18 134.523 57.9400   3
   4  -9 -17 373.742 59.6080   3
   4  -9 -16 16.4400 29.6693   3
   4  -9 -15 12545.2 414.541   5
   4  -9 -15 11777.0 446.022   3
  -4  -9  15 12526.9 375.136   2
   4  -9 -14 341.508 53.5924   5
  -4  -9  14 370.853 54.5249   2
   4  -9 -14 313.531 54.7634   3
  -4  -9  13 24071.5 626.325   2
   4  -9 -13 24213.2 702.747   3
  -4  -9  12 147.019 39.3023   2
   4  -9 -12 233.208 52.6100   3
  -4  -9  11 19688.6 538.031   2
   4  -9 -11 19073.3 569.791   3
  -4  -9  10 1213.12 97.2060   2
   4  -9 -10 1186.22 109.702   3
  -4  -9   9 15526.0 463.067   2
   4  -9  -9 14894.9 459.444   3
   4  -9  -8 3.50851 23.2767   4
  -4  -9   8 74.6499 45.3659   2
   4  -9  -7 1735.33 117.913   4
  -4  -9   7 2049.51 136.158   2
   4  -9  -6 182.350 45.1846   4
  -4  -9   6 226.002 48.9376   2
   4   9  -6 73.2895 16.0041   3
  -4  -9   5 354.333 54.3129   2
  -4  -9   5 320.041 31.3965   3
  -4  -9   5 311.051 38.7774   5
   4   9  -5 368.328 26.3048   3
   4  -9  -5 475.579 55.1653   4
  -4   9   5 374.076 50.1623   1
   4   9  -4 1104.52 64.4668   1
  -4  -9   4 1162.73 95.1743   2
  -4   9   4 1043.85 90.4324   1
  -4  -9   4 1103.72 66.6931   3
   4   9  -4 1089.65 53.7631   3
  -4  -9   4 878.959 57.2963   5
   4  -9  -4 960.571 78.2886   4
  -4  -9   3 12754.0 397.312   2
  -4   9   3 13098.6 409.116   1
   4   9  -3 13088.2 325.878   3
   4   9  -3 13463.9 346.293   1
   4  -9  -3 12954.7 380.061   4
  -4  -9   3 12998.7 352.968   3
   4   9  -2 782.837 57.4612   1
  -4   9   2 801.037 74.0167   1
   4   9  -2 887.232 53.1341   3
  -4  -9   2 700.419 72.1100   2
  -4  -9   2 747.102 57.9486   3
   4   9  -1 41748.4 929.391   3
  -4  -9   1 39102.4 994.002   2
  -4   9   1 40280.0 1007.38   1
  -4  -9   1 41889.6 953.763   3
  -4  -9   0 36.6415 32.4183   2
  -4  -9   0 13.3058 27.7573   3
  -4   9   0 38.6781 18.8225   1
  -4  -9  -1 15555.0 441.207   3
   4  -9   1 16242.8 424.168   3
   4  -9   1 16851.0 411.889   2
   4  -9   2 219.929 31.0414   3
   4  -9   2 241.503 28.8688   2
  -4  -9  -2 217.677 43.8400   3
  -4  -9  -3 10477.4 351.988   3
   4  -9   3 11741.0 296.361   2
   4  -9   3 12580.5 330.604   3
  -4  -9  -4 771.807 73.7679   3
   4  -9   4 803.787 43.1386   2
   4  -9   4 642.160 58.2354   3
  -4  -9  -5 2559.75 136.273   3
   4  -9   5 1724.21 56.2738   2
   4  -9   5 2455.02 93.8600   3
   4  -9   6 444.114 46.3071   3
  -4  -9  -6 717.129 80.3471   3
  -4  -9  -7 28.9556 35.9286   3
  -4  -9  -8 616.806 77.5357   3
  -4  -9  -9 10217.0 372.778   3
  -4  -9 -10 207.242 59.8393   3
  -4  -9 -11 15371.1 518.983   3
  -4  -9 -12 142.651 66.8844   3
  -4  -9 -13 5105.78 277.845   3
  -4  -9 -13 5158.32 262.222   4
  -4  -9 -14 246.170 68.2800   3
  -4  -9 -14 239.500 55.0472   4
  -4  -9 -15 236.287 75.2580   3
  -4  -9 -15 311.817 71.7450   4
  -4  -9 -16 45.3115 71.5058   3
  -4  -9 -16-21.3133 46.5852   4
  -4  -9 -17 605.792 106.253   3
  -4  -9 -18-8.71475 67.1383   3
  -4  -9 -18 58.7585 44.0590   4
  -4  -9 -19 4641.55 279.997   4
   4 -10 -20 2065.69 189.569   3
   4 -10 -19 3807.24 256.372   3
   4 -10 -18 5517.04 305.102   3
   4 -10 -17 6402.79 322.852   3
   4 -10 -16 6771.83 329.145   3
   4 -10 -15 5229.42 272.196   3
   4 -10 -15 5530.93 243.931   5
   4 -10 -14 2756.45 160.093   5
   4 -10 -14 2755.41 184.086   3
  -4 -10  14 2794.88 148.457   2
   4 -10 -13 5544.78 269.114   3
  -4 -10  13 5692.49 221.879   2
  -4 -10  12 697.742 67.2888   2
   4 -10 -12 664.524 85.8176   3
  -4 -10  11 621.572 64.2782   2
   4 -10 -11 720.101 85.7430   3
  -4 -10  10 5311.16 226.422   2
   4 -10 -10 5261.64 239.642   3
   4 -10  -9 462.730 68.3361   3
  -4 -10   9 560.614 77.4835   2
   4 -10  -9 509.346 68.5763   4
  -4 -10   8 14564.6 454.309   2
   4 -10  -8 14267.1 440.560   3
   4 -10  -8 13825.4 440.424   4
  -4 -10   7 655.518 81.0585   2
   4 -10  -7 701.094 74.2846   3
   4 -10  -7 589.321 70.7779   4
   4 -10  -6 15329.5 458.480   4
  -4 -10   6 15505.1 486.444   2
  -4 -10   5 659.460 81.9879   2
  -4  10   5 546.639 63.6323   1
  -4 -10   5 399.059 47.4821   5
   4 -10  -5 554.784 65.5307   4
  -4 -10   5 378.628 36.2968   3
  -4 -10   4 3754.40 181.412   2
   4  10  -4 3692.22 137.948   1
  -4  10   4 3884.21 186.330   1
   4 -10  -4 3628.45 165.945   4
  -4 -10   4 3871.42 133.412   3
  -4 -10   3 131.065 40.5686   2
  -4  10   3 115.130 44.0703   1
   4  10  -3 105.407 23.7105   1
   4  10  -3 109.019 18.1312   3
   4 -10  -3 90.8222 38.9629   4
  -4 -10   3 147.517 30.7207   3
   4  10  -2 12018.9 318.780   3
   4  10  -2 12653.8 343.630   1
  -4 -10   2 12083.8 394.360   2
  -4 -10   2 12395.4 344.452   3
  -4  10   2 12212.3 399.560   1
   4 -10  -2 11997.0 368.020   4
  -4 -10   1 592.613 58.1997   3
  -4 -10   1 483.710 65.1152   2
  -4  10   1 582.210 70.8293   1
  -4 -10   0 62.2982 28.3955   2
  -4 -10   0 82.1044 28.9788   3
  -4  10   0 66.6178 37.6365   1
  -4 -10  -1 4053.57 172.930   3
  -4 -10  -2 9635.12 313.348   3
   4 -10   2 10728.0 275.157   2
   4 -10   3 14762.1 394.847   3
  -4 -10  -3 13749.3 429.839   3
   4 -10   3 14992.3 369.999   2
   4 -10   4 8687.95 264.208   2
   4 -10   4 9729.13 300.884   3
  -4 -10  -5 11727.6 366.665   3
   4 -10   5 9851.21 259.755   2
  -4 -10  -6 14073.7 446.818   3
  -4 -10  -7 13598.6 445.842   3
  -4 -10  -8 6050.57 268.161   3
  -4 -10  -9 3747.58 206.376   3
  -4 -10 -10 427.692 74.6365   3
  -4 -10 -11 0.87461 23.4468   3
  -4 -10 -12 38.9271 41.9651   3
  -4 -10 -13 1394.42 135.310   3
  -4 -10 -13 1302.26 121.458   4
  -4 -10 -14 2160.44 170.559   4
  -4 -10 -14 2094.57 183.097   3
  -4 -10 -15 4691.87 290.285   3
  -4 -10 -15 5005.80 272.545   4
  -4 -10 -16 9099.96 438.015   3
  -4 -10 -16 10639.3 434.119   4
  -4 -10 -17 3684.12 274.446   3
  -4 -10 -17 3878.50 245.958   4
  -4 -10 -18 7559.04 416.117   3
  -4 -10 -18 8458.37 395.351   4
  -4 -10 -19 5593.25 317.217   4
   4 -11 -19 722.617 115.141   3
   4 -11 -18 280.222 71.8823   3
   4 -11 -17 27.3038 39.9444   3
   4 -11 -16 1169.33 134.546   3
   4 -11 -15 783.922 103.557   3
   4 -11 -15 951.188 91.3517   5
   4 -11 -14 7490.55 344.480   3
   4 -11 -14 8633.02 312.432   5
  -4 -11  13 1250.33 99.4783   2
   4 -11 -13 1209.97 120.553   3
   4 -11 -12 11153.7 416.859   3
  -4 -11  12 12121.5 381.176   2
   4 -11 -11 174.020 57.0229   3
  -4 -11  11 212.496 46.6627   2
  -4 -11  10 7002.39 278.542   2
   4 -11 -10 6839.99 287.591   3
  -4 -11   9 1828.88 131.792   2
   4 -11  -9 1825.56 129.715   3
   4 -11  -9 1561.09 124.796   4
   4 -11  -8 3925.30 191.871   3
   4 -11  -8 3940.55 201.445   4
  -4 -11   8 3967.46 207.706   2
  -4 -11   7 8.29556 17.1379   2
   4 -11  -7 41.2319 19.6466   3
   4 -11  -7 5.60760 19.6544   4
   4 -11  -6 101.926 31.7074   4
  -4 -11   6 159.469 33.2526   2
  -4  11   6 114.215 37.6616   1
   4 -11  -6 139.814 31.7599   3
  -4 -11   5 1115.05 101.291   2
  -4  11   5 1190.15 103.946   1
   4 -11  -5 1041.65 89.2533   3
   4 -11  -5 1117.79 100.453   4
  -4 -11   5 421.155 41.0268   3
  -4 -11   4 10302.1 355.701   2
   4  11  -4 9552.42 295.913   1
  -4  11   4 9865.09 359.835   1
   4 -11  -4 9781.67 337.049   4
  -4 -11   4 10324.2 281.134   3
  -4  11   3 503.997 72.2338   1
   4 -11  -3 463.443 73.3235   4
  -4 -11   3 409.946 51.5475   3
   4  11  -3 362.054 44.9324   1
  -4 -11   3 427.104 67.4190   2
   4  11  -2 33804.9 820.420   1
  -4 -11   2 33338.8 883.076   2
  -4  11   2 33748.9 893.557   1
   4 -11  -2 34078.1 859.203   4
  -4 -11   2 36072.5 823.431   3
  -4  11   1 1939.50 141.263   1
   4  11  -1 2019.29 112.762   1
  -4 -11   1 1881.60 137.644   2
  -4 -11   1 2063.88 110.754   3
  -4 -11   0 33912.9 899.791   2
  -4 -11   0 35823.3 848.533   3
  -4  11   0 34593.5 913.923   1
  -4 -11  -1 1765.59 114.018   3
  -4 -11  -2 19495.4 540.428   3
  -4 -11  -3 1202.33 102.715   3
  -4 -11  -4 8823.76 318.071   3
  -4 -11  -5 7.76036 19.6142   3
   4 -11   5 2.86065 9.92132   2
  -4 -11  -6 554.569 85.0249   3
  -4 -11  -7 515.339 69.1524   3
  -4 -11  -8 660.741 82.5437   3
  -4 -11  -9 4936.29 254.305   3
  -4 -11 -10 6558.77 306.090   3
  -4 -11 -11 2067.20 162.544   3
  -4 -11 -12 6994.41 329.177   4
  -4 -11 -12 6530.17 326.877   3
  -4 -11 -13 2253.63 182.505   3
  -4 -11 -13 2493.40 188.995   4
  -4 -11 -14 2955.27 218.186   3
  -4 -11 -14 2817.94 209.117   4
  -4 -11 -15 1369.99 139.097   4
  -4 -11 -15 1190.94 153.986   3
  -4 -11 -16 72.1168 77.8881   3
  -4 -11 -16 129.307 40.2433   4
  -4 -11 -17 417.131 80.4968   3
  -4 -11 -17 692.017 111.464   4
  -4 -11 -18 2203.55 203.164   4
   4 -12 -18 3216.75 231.274   3
   4 -12 -17 6844.10 351.743   3
   4 -12 -16 3100.80 224.994   3
   4 -12 -15 5783.24 251.972   5
   4 -12 -15 5137.73 286.031   3
   4 -12 -14 5189.91 232.358   5
   4 -12 -14 4772.33 267.005   3
   4 -12 -13 173.618 50.4345   3
  -4 -12  12 1880.76 124.751   2
   4 -12 -12 1414.94 136.465   3
  -4 -12  11 2759.77 165.830   2
   4 -12 -11 2318.98 165.250   3
  -4 -12  10 91.2141 55.3168   2
   4 -12 -10 47.0573 35.4658   3
   4 -12  -9 7126.48 297.945   3
   4 -12  -9 7013.65 301.250   4
  -4 -12   9 7410.49 301.041   2
   4 -12  -8 94.7626 37.6026   3
  -4 -12   8 84.1537 44.0077   2
   4 -12  -8 170.887 53.3959   4
  -4  12   7 10878.6 413.098   1
   4 -12  -7 12595.5 402.255   3
   4 -12  -7 11907.4 413.365   4
  -4 -12   7 12332.2 435.505   2
  -4  12   6 183.072 51.0699   1
  -4 -12   6 190.281 44.4807   2
   4 -12  -6 168.650 39.6634   3
   4 -12  -6 256.198 57.4146   4
   4 -12  -5 13099.8 403.350   3
  -4  12   5 13193.3 446.780   1
   4 -12  -5 12886.5 427.058   4
  -4 -12   5 13212.8 445.657   2
  -4 -12   4 852.657 92.6733   2
   4 -12  -4 1114.73 102.291   4
  -4  12   4 1022.22 100.436   1
   4 -12  -4 1013.45 91.3540   3
  -4 -12   4 978.995 66.3348   3
  -4 -12   3 13017.3 355.058   3
  -4 -12   3 11779.2 411.585   2
  -4  12   3 12231.7 426.800   1
   4 -12  -3 12110.5 372.497   3
   4 -12  -3 12548.1 407.626   4
   4  12  -3 12670.6 366.968   1
   4  12  -2 27.0392 26.9045   1
  -4 -12   2 58.3306 29.0007   3
   4 -12  -2 16.0457 26.0839   3
   4 -12  -2 48.7916 32.0882   4
  -4 -12   2 38.4651 23.7129   2
  -4  12   2 28.2234 29.3035   1
   4  12  -1 2774.87 140.664   1
  -4 -12   1 2729.23 165.799   2
   4 -12  -1 2721.15 132.015   3
  -4  12   1 2664.18 169.848   1
  -4 -12   1 2910.67 136.278   3
  -4 -12   0 28.6258 34.7087   3
   4  12   0 11.5909 27.3313   1
  -4  12   0-21.2679 26.3338   1
  -4 -12   0 57.6967 33.5288   2
  -4 -12  -1 1737.93 135.851   2
  -4 -12  -1 1850.83 118.055   3
  -4 -12  -2 3644.60 178.798   3
  -4 -12  -3 6600.58 263.729   3
  -4 -12  -4 7704.37 300.785   3
   4 -12   4 7386.98 232.274   2
  -4 -12  -5 8939.86 337.786   3
  -4 -12  -6 2509.49 163.916   3
  -4 -12  -7 11185.6 406.040   3
  -4 -12  -8 1081.82 113.229   3
  -4 -12  -9 4929.96 258.213   3
  -4 -12 -10 35.9988 49.1633   3
  -4 -12 -11 112.586 29.5133   4
  -4 -12 -11 238.939 79.0486   3
  -4 -12 -12-19.4461 29.0972   3
  -4 -12 -12-17.3258 46.1994   4
  -4 -12 -13 1556.01 150.495   3
  -4 -12 -13 1840.16 169.423   4
  -4 -12 -14 3008.38 229.213   3
  -4 -12 -14 3554.24 241.625   4
  -4 -12 -15 2597.89 216.287   3
  -4 -12 -15 2920.95 211.960   4
  -4 -12 -16 2388.32 212.053   3
  -4 -12 -16 2714.56 213.588   4
  -4 -12 -17 4802.24 304.587   4
   4 -13 -17 209.893 76.7311   3
   4 -13 -16 49.8724 54.9721   3
   4 -13 -15 3608.03 242.637   3
   4 -13 -14 450.562 93.8562   3
   4 -13 -13 8386.19 369.164   3
   4 -13 -12 1350.52 130.092   3
  -4 -13  11 14576.2 461.353   2
   4 -13 -11 13347.2 484.658   3
   4 -13 -10 1489.67 138.661   3
  -4 -13  10 2035.64 151.473   2
   4 -13  -9 5260.50 252.697   3
  -4 -13   9 5979.52 272.540   2
   4 -13  -9 5645.86 279.013   4
  -4  13   8 1938.94 151.981   1
   4 -13  -8 2152.13 148.391   3
   4 -13  -8 2065.60 157.054   4
  -4 -13   8 2097.32 160.260   2
  -4  13   7 3649.60 211.618   1
  -4 -13   7 3874.65 225.674   2
   4 -13  -7 3924.90 199.710   3
   4 -13  -7 3891.88 213.765   4
   4 -13  -6 151.849 37.1693   4
  -4 -13   6 162.449 54.0781   2
  -4  13   6 151.186 47.9412   1
   4 -13  -6 113.046 37.3141   3
   4 -13  -5 879.296 94.1104   4
  -4 -13   5 770.467 91.0635   2
   4 -13  -5 915.085 86.5946   3
  -4  13   5 667.171 86.2502   1
  -4  13   4 341.428 79.7813   1
  -4 -13   4 351.289 64.3686   2
   4 -13  -4 385.101 57.2601   3
   4 -13  -4 400.891 67.5134   4
   4 -13  -3 7018.51 289.566   4
  -4 -13   3 6557.17 288.258   2
   4 -13  -3 7275.60 259.775   3
   4  13  -3 7203.46 254.940   1
  -4  13   3 6683.69 301.685   1
   4  13  -2 114.775 33.8229   1
   4 -13  -2 200.855 45.3837   3
  -4 -13   2 128.488 39.7544   2
  -4 -13   2 74.9362 24.9511   3
  -4  13   2 210.504 50.9134   1
   4  13  -1 16057.9 452.315   1
   4 -13  -1 14508.7 424.362   3
  -4 -13   1 14691.8 494.221   2
  -4 -13   1 16070.1 438.565   3
  -4  13   1 15113.4 511.528   1
  -4  13   0 208.795 42.6166   1
   4  13   0 161.779 44.4406   1
   4 -13   0 230.247 41.8965   3
  -4 -13   0 217.977 50.2062   3
  -4 -13   0 273.184 60.4096   2
   4 -13   1 9431.21 287.167   3
  -4 -13  -1 9603.15 374.418   2
  -4 -13  -1 9935.55 329.495   3
  -4 -13  -2 91.8902 48.9736   3
  -4 -13  -3 10155.5 357.357   3
  -4 -13  -4 338.623 64.5361   3
  -4 -13  -5 328.455 69.2262   3
  -4 -13  -6 294.400 63.8993   3
  -4 -13  -7 1607.84 138.448   3
  -4 -13  -8 2249.66 171.025   3
  -4 -13  -9 5774.34 294.193   3
  -4 -13 -10 3965.24 248.500   3
  -4 -13 -10 3828.83 239.674   4
  -4 -13 -11 9504.53 414.660   3
  -4 -13 -11 10205.0 430.056   4
  -4 -13 -12 4066.99 262.145   3
  -4 -13 -12 4768.28 280.764   4
  -4 -13 -13 9053.50 427.645   3
  -4 -13 -13 10760.3 450.550   4
  -4 -13 -14 2078.18 194.349   3
  -4 -13 -14 2661.06 209.033   4
  -4 -13 -15 2246.59 200.490   3
  -4 -13 -15 2803.58 223.398   4
   4 -14 -16 4293.38 284.234   3
   4 -14 -15 38.1087 46.5755   3
   4 -14 -14 1448.87 143.685   3
   4 -14 -13 380.648 79.4857   3
   4 -14 -12 270.347 59.7492   3
   4 -14 -11 64.3021 22.7428   3
   4 -14 -10 6718.37 306.764   3
  -4  14   9 335.184 84.1644   1
   4 -14  -9 363.340 73.3277   3
  -4 -14   9 392.107 84.1694   2
  -4  14   8 14733.8 532.547   1
   4 -14  -8 15673.3 507.309   3
  -4 -14   8 16285.0 545.536   2
   4 -14  -7 2304.42 177.810   4
  -4  14   7 2275.07 179.624   1
   4 -14  -7 2457.66 163.684   3
  -4 -14   7 2482.77 185.867   2
  -4  14   6 16519.7 565.126   1
   4 -14  -6 17806.8 532.568   3
   4 -14  -6 17595.4 564.147   4
  -4 -14   6 18074.6 591.541   2
  -4 -14   5 426.548 76.8117   2
   4 -14  -5 292.100 60.9635   3
  -4  14   5 283.115 69.5400   1
   4 -14  -5 430.677 84.3622   4
  -4 -14   4 15450.9 533.029   2
   4 -14  -4 17072.6 490.999   3
  -4  14   4 16252.3 551.370   1
   4 -14  -4 16301.3 528.730   4
  -4  14   3 192.763 42.3882   1
   4 -14  -3 263.171 49.5839   3
  -4 -14   3 181.380 57.8938   2
   4  14  -3 170.118 33.1366   1
  -4 -14   2 7015.83 313.645   2
   4 -14  -2 7846.76 272.953   3
  -4  14   2 7035.14 324.897   1
   4  14  -2 7704.12 277.966   1
   4 -14  -1 396.497 55.7203   3
  -4  14   1 436.707 68.8391   1
   4  14  -1 408.623 59.3609   1
  -4 -14   1 422.864 72.9249   2
  -4 -14   0 292.816 51.4526   3
   4  14   0 203.728 49.1224   1
  -4  14   0 225.308 31.6917   1
  -4 -14   0 224.568 62.6168   2
   4  14   1 995.194 97.4844   1
  -4 -14  -1 846.516 102.596   2
  -4 -14  -1 1077.87 94.0570   3
  -4 -14  -2 1189.86 131.421   2
  -4 -14  -2 1322.60 109.935   3
  -4 -14  -3 2200.43 148.409   3
  -4 -14  -4 6780.29 294.572   3
  -4 -14  -5 5093.41 255.613   3
  -4 -14  -6 10558.7 410.865   3
  -4 -14  -7 2229.25 170.920   3
  -4 -14  -8 6457.94 318.729   3
  -4 -14  -9 320.696 72.8183   3
  -4 -14  -9 238.039 64.1563   4
  -4 -14 -10 1204.96 134.874   3
  -4 -14 -10 1182.22 132.893   4
  -4 -14 -11 349.712 72.3198   3
  -4 -14 -11 557.604 93.0101   4
  -4 -14 -12 137.678 46.4118   3
  -4 -14 -12 187.508 68.0057   4
  -4 -14 -13 40.0643 52.9134   3
  -4 -14 -13 81.9876 88.7332   4
  -4 -14 -14 2714.66 229.051   3
   4 -15 -15 337.586 62.8507   3
   4 -15 -14 3638.36 241.860   3
   4 -15 -13 1070.11 132.933   3
   4 -15 -12 5536.69 293.818   3
   4 -15 -11 1041.59 115.323   3
  -4  15  10 3927.25 247.375   1
   4 -15 -10 3953.61 230.588   3
   4 -15  -9 726.281 96.7980   3
  -4  15   9 677.846 96.6993   1
   4 -15  -8 989.622 107.905   3
  -4  15   8 936.639 115.729   1
  -4 -15   8 987.769 114.045   2
   4 -15  -7 235.502 40.4581   3
  -4 -15   7 212.089 59.2530   2
  -4  15   7 237.879 56.7548   1
  -4 -15   6 38.6575 24.7514   2
   4 -15  -6 40.4928 34.8995   3
  -4  15   6 20.3768 34.4519   1
  -4 -15   5 44.7385 24.4423   2
  -4  15   5 37.3091 29.5630   1
   4 -15  -5-3.41971 29.1562   3
  -4 -15   4 1989.95 165.697   2
   4 -15  -4 2450.48 150.729   3
  -4  15   4 2082.25 171.358   1
  -4  15   3 1677.28 150.791   1
  -4 -15   3 1505.63 140.037   2
   4 -15  -3 1711.10 120.599   3
  -4 -15   2 7680.65 335.150   2
   4  15  -2 7634.02 291.954   1
  -4  15   2 7521.44 346.616   1
  -4  15   1 2732.25 196.928   1
  -4 -15   1 2898.27 197.326   2
   4  15  -1 3220.92 175.301   1
   4  15   0 9277.73 332.474   1
  -4 -15   0 7907.29 359.594   2
   4  15   1 783.667 90.7041   1
  -4 -15  -1 682.921 88.6851   2
   4  15   2 7835.55 314.300   1
  -4 -15  -2 7156.14 339.130   2
  -4 -15  -3 113.401 62.0129   3
  -4 -15  -3 29.3019 52.0077   2
  -4 -15  -4 778.706 102.679   3
  -4 -15  -5 217.494 64.2231   3
  -4 -15  -6 896.090 105.198   3
  -4 -15  -7 2812.96 198.546   3
  -4 -15  -7 2309.34 197.754   4
  -4 -15  -8 6175.64 318.964   3
  -4 -15  -8 6107.61 325.986   4
  -4 -15  -9 3954.55 251.564   3
  -4 -15  -9 4099.81 259.827   4
  -4 -15 -10 10298.2 447.751   3
  -4 -15 -10 10958.4 470.605   4
  -4 -15 -11 4105.23 266.871   3
  -4 -15 -11 4507.64 291.868   4
  -4 -15 -12 10497.4 474.446   3
   4 -16 -13 996.520 123.723   3
   4 -16 -12 138.446 46.4841   3
   4 -16 -11 2265.71 184.715   3
   4 -16 -10 3.46662 35.1353   3
  -4  16   9 8186.41 382.419   1
   4 -16  -9 7960.74 350.382   3
   4 -16  -8 59.8855 49.2852   3
  -4  16   8-14.7349 26.4809   1
   4 -16  -7 17189.7 548.411   3
  -4  16   7 15950.4 588.593   1
  -4 -16   7 17196.8 604.523   2
  -4 -16   6 1058.06 131.467   2
  -4  16   6 1059.86 130.637   1
   4 -16  -6 1132.85 119.613   3
  -4  16   5 19021.9 647.354   1
  -4 -16   5 19154.7 646.169   2
  -4 -16   4 139.748 71.5671   2
  -4  16   4 58.4455 33.7141   1
  -4 -16   3 8246.52 371.586   2
  -4  16   3 8816.63 391.746   1
  -4  16   2 126.795 53.6157   1
  -4 -16   2 80.5262 42.9932   2
  -4  16   1 2978.08 207.410   1
  -4 -16   1 3018.12 209.395   2
  -4 -16   0 100.457 48.6045   2
  -4 -16  -1 85.8358 58.7478   2
   4  16   1 107.598 56.6748   1
   4  16   2 60.6800 45.6581   1
  -4 -16  -2 43.2489 33.5196   2
   4  16   3 6447.52 290.885   1
  -4 -16  -3 5564.83 314.456   2
  -4 -16  -4 183.515 80.9026   2
   4  16   4 61.2683 68.6305   1
  -4 -16  -5 12754.2 504.966   4
  -4 -16  -6 247.280 80.9003   3
  -4 -16  -6 284.965 70.1356   4
  -4 -16  -7 5489.31 301.331   3
  -4 -16  -7 5218.18 299.609   4
  -4 -16  -8 420.863 85.9106   3
  -4 -16  -8 334.006 50.0722   4
  -4 -16  -9 2102.62 179.208   3
  -4 -16 -10-46.2989 57.4910   3
  -4 -16 -11 212.738 74.1538   3
   4 -17 -12 3333.40 232.935   3
   4 -17 -11 2481.62 190.441   3
   4 -17 -10 3633.21 228.770   3
   4 -17  -9 1939.71 164.426   3
  -4  17   8 1376.61 159.153   1
  -4  17   7-33.1867 54.0206   1
  -4  17   6 7.58192 51.0354   1
  -4 -17   5 595.350 108.887   2
  -4 -17   5 466.408 84.5672   4
  -4  17   5 756.559 119.480   1
  -4 -17   4 1039.90 129.370   2
  -4  17   4 1152.33 138.337   1
  -4 -17   3 1350.68 151.571   2
  -4  17   3 1623.86 164.960   1
  -4 -17   2 2594.62 198.207   2
  -4  17   2 2911.35 212.149   1
  -4 -17   1 3842.65 243.262   2
  -4 -17   0 2378.74 196.645   2
  -4 -17  -1 3026.36 227.215   2
  -4 -17  -1 3007.01 216.570   4
  -4 -17  -2 3286.30 229.498   4
  -4 -17  -2 3199.20 231.007   2
  -4 -17  -3 831.109 112.834   4
  -4 -17  -3 844.970 129.361   2
   4  17   4 60.6430 34.9150   1
  -4 -17  -4 44.5338 61.8916   4
  -4 -17  -4 99.4116 76.8200   2
   4  17   5 1040.62 124.173   1
  -4 -17  -5 564.430 79.8757   4
  -4 -17  -5 1025.08 154.673   2
  -4  18   5 144.820 82.7550   1
  -4  18   4 7727.49 396.112   1
  -4 -18   4 7170.36 341.281   4
  -4  18   3 128.570 56.0986   1
  -4 -18   3 96.7108 24.1671   4
  -4 -18   3 271.858 53.8094   2
  -4 -18   2 3224.42 234.779   2
  -4 -18   2 3377.82 224.209   4
  -4 -18   1 637.689 97.1334   2
  -4 -18   1 625.044 74.6608   4
  -4 -18   0-27.1971 55.3378   4
  -4 -18   0 142.335 40.9478   2
  -4 -18  -1 305.162 74.1272   4
  -4 -18  -1 342.619 90.9538   2
  -4 -18  -2 1492.22 159.653   2
  -4 -18  -3 197.778 89.4088   2
  -4 -19   1 590.366 120.085   2
   5   0 -25-70.7892 72.8555   3
   5   0 -24 2140.45 170.692   3
   5   0 -23 1.14185 31.2655   3
   5   0 -22 6327.77 295.213   3
   5   0 -21-7.52946 29.0101   3
   5   0 -20-1.97436 28.0115   3
   5   0 -19-21.1045 17.7275   3
   5   0 -18 4458.66 211.973   3
   5   0 -17-5.08535 16.3876   3
   5   0 -16 14762.2 447.166   3
   5   0 -15 56.6417 32.3098   3
  -5   0  15-1.63223 23.8473   2
  -5   0  14 39205.5 961.848   2
  -5   0  13 0.47895 19.3191   2
  -5   0  12 15030.5 432.291   2
  -5   0  11 19.1204 28.7412   2
   5   0 -11-12.1992 19.1696   5
   5   0 -10 13010.8 361.913   5
  -5   0  10 11815.1 356.358   2
  -5   0   9 25.8446 24.2828   2
  -5   0   8 6280.90 214.314   2
  -5   0   7 7.90657 17.5505   2
   5   0  -6 1119.65 75.1542   2
  -5   0   6 1245.05 77.4300   2
  -5   0   5 38.1082 18.7212   2
  -5   0   5 4.89829 12.6705   1
   5   0  -5 5.03572 11.0985   2
  -5   0   4 77742.7 1740.59   2
   5   0  -4 78732.8 1730.51   2
  -5   0   4 78777.0 1693.63   1
   5   0  -4 82139.0 1729.20   3
  -5   0   3-25.2681 19.1514   2
   5   0  -3 38.6458 14.6856   2
   5   0  -3 37.4849 17.8007   3
  -5   0   2 60307.5 1350.81   2
   5   0  -2 59295.5 1313.49   1
  -5   0   2 60736.3 1355.15   3
   5   0  -2 61157.9 1349.61   2
   5   0  -2 60088.1 1352.21   3
   5   0  -1 2.26341 16.0892   2
  -5   0   1 32.7963 17.6766   2
  -5   0   1 26.1334 24.9471   3
   5   0  -1 2.15035 23.6408   3
   5   0   0 18349.1 458.131   2
   5   0   0 19275.2 477.922   3
  -5   0   0 18444.2 462.572   2
  -5   0   0 18352.5 478.127   3
  -5   0  -1-0.22581 14.5991   3
   5   0   1 14.1941 16.1243   2
  -5   0  -1 23.3550 17.6221   2
   5   0   1 12.2397 13.6029   3
   5   0   2 70114.0 1553.97   3
  -5   0  -2 71803.3 1541.02   2
  -5   0  -2 69900.6 1568.09   3
  -5   0  -3 22.7949 17.3613   2
  -5   0  -3 31.6878 24.3732   3
   5   0   3 39.7734 23.5830   3
   5   0   4 450.293 51.3597   3
  -5   0  -4 486.986 39.5730   2
  -5   0  -4 482.432 51.8429   3
  -5   0  -5 13.4266 24.5253   3
  -5   0  -5 11.1600 17.0183   2
  -5   0  -6 626.204 46.5139   2
  -5   0  -6 593.916 61.2024   3
  -5   0  -7 12.9430 24.3217   3
  -5   0  -7 7.99267 15.4647   2
  -5   0  -8 12325.4 375.215   3
  -5   0  -9 12.0183 24.7314   3
  -5   0 -10 30964.4 793.202   3
  -5   0 -11-15.7209 38.0826   3
  -5   0 -12 9588.77 342.949   3
  -5   0 -13 32.6462 21.6365   3
  -5   0 -14 247.665 55.2780   3
  -5   0 -14 299.428 37.8552   4
  -5   0 -15-3.47232 35.6649   3
  -5   0 -15 21.2438 19.4304   4
  -5   0 -16 141.619 47.3937   3
  -5   0 -17-32.5478 21.7594   3
  -5   0 -18 5572.50 290.700   3
  -5   0 -19-14.2781 26.6375   3
  -5   0 -20 6473.60 334.644   3
  -5   0 -21 15.9917 65.9308   3
  -5   0 -22 9200.07 443.041   3
  -5   0 -23 13.4446 29.6540   3
   5  -1 -26 206.275 62.5556   3
   5  -1 -25 57.6891 59.8968   3
   5   1 -24 202.739 49.0326   3
   5  -1 -24 122.004 30.3428   3
   5   1 -23 1033.04 106.821   3
   5  -1 -23 897.216 108.572   3
   5   1 -22 3299.99 196.946   3
   5  -1 -22 3233.84 208.871   3
   5   1 -21 5020.06 244.039   3
   5  -1 -21 5259.07 262.923   3
   5   1 -20 8038.08 312.059   3
   5  -1 -20 7648.39 327.815   3
   5   1 -19 7176.67 285.236   3
   5  -1 -19 6843.70 297.188   3
   5   1 -18 18666.2 539.636   3
   5  -1 -18 18029.8 557.010   3
   5   1 -17 7766.94 292.176   3
   5  -1 -17 8451.70 313.646   3
   5   1 -16 5125.67 211.585   3
  -5  -1  16 5156.56 222.465   2
   5  -1 -16 5071.13 223.574   3
  -5  -1  15 9513.90 323.942   2
   5   1 -15 9752.12 317.826   3
   5  -1 -15 9609.04 333.642   3
  -5   1  14 4631.63 206.458   2
  -5  -1  14 4997.67 205.886   2
  -5   1  13 817.419 79.8324   2
  -5  -1  13 722.664 71.0382   2
   5  -1 -12 161.950 42.0717   5
  -5   1  12 75.2679 37.2892   2
  -5  -1  12 114.272 35.8041   2
   5  -1 -11 8067.53 267.251   5
  -5   1  11 7571.48 262.242   2
  -5  -1  11 7661.62 261.469   2
  -5  -1  10 815.275 69.0336   2
   5   1 -10 797.820 66.1493   5
  -5   1  10 747.758 67.0136   2
   5   1  -9 1990.91 104.069   5
  -5   1   9 1990.64 109.951   2
  -5  -1   9 2048.16 108.354   2
  -5  -1   8 4766.38 182.176   2
  -5   1   8 4893.77 178.480   2
  -5  -1   7 30558.2 736.461   2
  -5   1   7 30427.3 728.306   2
  -5  -1   6 8654.12 266.726   2
   5  -1  -6 8983.94 262.576   2
   5   1  -6 9138.64 263.205   2
  -5   1   6 8120.39 258.283   2
  -5   1   5 12806.3 313.899   1
  -5  -1   5 10288.8 333.690   2
   5  -1  -5 12591.7 334.875   2
  -5  -1   5 12500.3 287.813   1
   5   1  -5 12355.3 341.234   2
   5   1  -5 13029.0 327.523   3
  -5   1   5 12067.2 335.139   2
  -5   1   4 54.4310 25.6230   2
  -5   1   4 54.1887 18.8900   1
  -5  -1   4 68.1795 22.2942   2
   5  -1  -4 10.5031 12.7838   2
   5   1  -4 68.7125 28.2828   2
   5   1  -4 57.5740 24.5146   3
  -5  -1   3 4825.56 163.820   3
   5  -1  -3 4679.60 154.328   2
  -5  -1   3 4365.94 166.428   2
   5   1  -3 4508.08 123.991   1
  -5   1   3 4700.56 159.884   2
   5  -1  -3 4162.71 159.988   3
   5   1  -3 4752.23 159.884   3
   5   1  -3 4868.37 171.979   2
  -5   1   3 4642.00 141.944   1
   5   1  -2 13718.4 348.725   2
  -5   1   2 13339.3 335.325   2
   5  -1  -2 12339.8 312.365   1
  -5  -1   2 12501.5 343.322   2
   5   1  -2 11216.6 295.478   1
  -5  -1   2 12310.9 341.172   3
   5  -1  -2 13515.2 335.977   3
   5  -1  -2 12564.7 324.641   2
   5   1  -2 13264.0 348.003   3
   5   1  -1 5106.34 179.206   2
  -5   1   1 5272.30 170.649   2
   5  -1  -1 4934.58 158.643   1
   5  -1  -1 5112.62 164.428   2
  -5  -1   1 5238.80 184.934   2
  -5  -1   1 5462.80 186.789   3
   5  -1  -1 5177.55 179.256   3
   5   1  -1 5468.04 189.808   3
  -5   1   1 5670.46 184.684   3
  -5   1   0 9055.57 269.792   2
   5   1   0 10234.5 283.217   2
   5   1   0 10724.3 298.677   3
  -5  -1   0 10544.2 303.526   3
   5  -1   0 10194.9 276.405   2
  -5  -1   0 10077.9 291.443   2
  -5   1   0 9869.65 294.562   3
   5  -1   0 10672.6 297.556   3
   5  -1   1 17911.1 455.487   2
   5   1   1 18143.4 465.417   2
  -5  -1  -1 19896.1 494.844   3
  -5   1  -1 18542.6 459.340   2
  -5   1  -1 19610.1 493.706   3
   5  -1   1 20910.1 490.009   3
  -5  -1  -1 18302.0 473.287   2
   5   1   1 19374.8 482.075   3
   5   1   2 19851.1 461.732   3
  -5  -1  -2 17849.5 444.648   2
   5  -1   2 16391.7 422.921   2
   5  -1   2 17722.9 459.490   3
  -5   1  -2 17788.2 434.904   2
  -5  -1  -2 17268.8 461.513   3
  -5   1  -2 18818.1 475.627   3
  -5  -1  -3 60901.5 1395.15   2
  -5  -1  -3 60505.4 1424.84   3
   5  -1   3 64520.9 1416.83   3
  -5   1  -3 61022.1 1386.91   2
  -5   1  -3 62372.7 1432.05   3
   5   1   3 65712.2 1419.79   3
   5  -1   4 15000.2 389.292   3
  -5  -1  -4 13760.3 395.110   3
  -5  -1  -4 14300.3 370.419   2
  -5   1  -4 14685.0 360.795   2
  -5   1  -4 13712.6 395.583   3
  -5   1  -5 41095.2 920.412   2
  -5  -1  -5 41734.2 938.526   2
  -5  -1  -5 41835.3 973.833   3
  -5   1  -5 40425.8 970.411   3
  -5   1  -6 18788.6 449.687   2
  -5   1  -6 19156.0 507.196   3
  -5  -1  -6 18394.3 500.956   3
  -5   1  -7 16407.7 388.628   2
  -5   1  -7 15359.1 439.291   3
  -5  -1  -7 14440.3 434.486   3
  -5   1  -8 276.028 47.1175   3
  -5  -1  -8 280.560 45.4490   3
  -5   1  -8 293.019 29.4529   2
  -5  -1  -9 4236.41 193.401   3
  -5   1  -9 4085.81 187.252   3
  -5   1  -9 4583.49 150.099   2
  -5  -1 -10 1235.93 97.8443   3
  -5   1 -10 1239.30 100.926   3
  -5   1 -11 41.8824 35.6232   3
  -5  -1 -11 64.4781 36.1518   3
  -5  -1 -12 10402.7 365.694   3
  -5   1 -12 10271.2 357.775   3
  -5   1 -13 5635.51 253.203   3
  -5  -1 -13 5757.23 260.314   3
  -5   1 -13 5957.88 173.897   4
  -5  -1 -14 18443.8 469.629   4
  -5   1 -14 18088.9 428.535   4
  -5   1 -14 16827.2 540.179   3
  -5  -1 -14 16872.1 550.244   3
  -5  -1 -15 7655.25 334.031   3
  -5  -1 -15 8805.32 260.200   4
  -5   1 -15 7406.23 321.292   3
  -5   1 -16 5595.96 269.518   3
  -5  -1 -16 5399.27 275.551   3
  -5  -1 -17 9249.11 388.678   3
  -5   1 -17 9146.13 377.077   3
  -5  -1 -18 5572.52 299.325   3
  -5   1 -18 5812.16 295.113   3
  -5   1 -19 2567.01 192.027   3
  -5  -1 -19 2645.66 205.177   3
  -5   1 -20 1818.47 167.436   3
  -5  -1 -20 1621.00 158.942   3
  -5   1 -21 25.5024 38.1508   3
  -5  -1 -21 157.983 61.5600   3
  -5   1 -22 383.775 64.5912   3
  -5  -1 -22 353.450 82.1451   3
   5  -2 -26 1175.09 137.650   3
   5  -2 -25 5937.31 323.173   3
   5  -2 -24 1100.50 130.533   3
   5  -2 -23 4369.99 252.727   3
   5   2 -22 212.884 50.0146   3
   5  -2 -22 205.168 57.8457   3
   5   2 -21 1197.91 104.395   3
   5  -2 -21 1186.08 119.569   3
   5   2 -20 261.824 53.1204   3
   5  -2 -20 257.813 57.5247   3
   5  -2 -19 91.5983 27.7624   3
   5   2 -19 148.722 40.8584   3
   5  -2 -18 121.267 48.0571   3
   5   2 -18 94.7388 39.4051   3
   5   2 -17 8052.23 285.836   3
   5  -2 -17 7669.90 310.798   3
  -5  -2  17 7902.06 296.573   2
  -5  -2  16 747.839 77.6299   2
   5   2 -16 636.460 67.0643   3
   5  -2 -16 568.888 72.6497   3
   5  -2 -15 24753.0 682.900   3
  -5  -2  15 24736.7 661.271   2
   5   2 -15 25654.7 648.629   3
  -5  -2  14 7969.15 281.837   2
  -5  -2  13 20254.4 545.306   2
   5  -2 -13 20248.9 557.380   5
   5  -2 -12 1354.65 94.9608   5
  -5   2  12 1213.19 97.0561   2
  -5  -2  12 1298.13 92.2072   2
  -5   2  11 20315.5 542.311   2
  -5  -2  11 20169.6 536.301   2
  -5  -2  10 6.15932 29.5296   2
  -5   2  10 23.4939 26.7767   2
  -5  -2   9 9541.65 293.974   2
  -5   2   9 9149.95 287.248   2
   5   2  -8 6475.39 208.218   5
  -5  -2   8 6444.75 222.745   2
  -5   2   8 6364.41 216.208   2
  -5  -2   7 507.458 51.6186   2
  -5   2   7 442.594 48.0595   2
   5   2  -7 475.074 44.3452   5
   5   2  -7 237.286 42.7862   3
   5  -2  -6 1819.36 91.3858   2
  -5  -2   6 1512.34 90.2321   2
  -5   2   6 1528.26 85.9238   2
  -5  -2   6 1472.50 50.2629   1
   5   2  -6 1448.73 98.2136   2
   5   2  -6 1660.76 82.6105   3
   5  -2  -5 23326.4 534.984   2
   5   2  -5 21452.1 520.254   3
  -5  -2   5 20192.7 547.132   2
  -5   2   5 19721.3 525.660   2
   5   2  -5 24587.2 559.752   2
   5  -2  -4 1570.33 81.1609   2
  -5   2   4 1604.75 77.7986   1
  -5   2   4 1508.69 81.0087   2
  -5  -2   4 1630.72 93.1749   2
   5   2  -4 1387.33 96.9077   2
   5   2  -4 1473.24 84.3279   3
   5  -2  -3 100180. 2055.28   2
  -5   2   3 92419.7 2052.86   2
   5   2  -3 88974.7 1999.71   1
  -5  -2   3 93829.5 2086.75   2
  -5   2   3 96477.4 2048.45   1
   5  -2  -3 99720.3 2065.06   3
  -5  -2   3 97161.8 2067.94   3
   5   2  -3 106245. 2089.73   2
   5   2  -3 101225. 2076.94   3
  -5   2   2 96.3830 27.1282   2
  -5   2   2 62.6765 16.2567   1
   5  -2  -2 114.417 25.3057   2
   5  -2  -2 92.9057 26.5264   1
   5   2  -2 100.298 27.3165   2
   5  -2  -2 119.778 23.5264   3
  -5  -2   2 68.8686 23.4546   3
  -5  -2   2 69.6616 25.6634   2
   5   2  -2 56.3915 27.2729   3
  -5   2   1 64220.1 1403.74   2
  -5  -2   1 66671.7 1440.15   3
  -5  -2   1 64808.8 1438.27   2
   5  -2  -1 62398.9 1396.28   2
   5   2  -1 65891.8 1427.76   2
   5  -2  -1 68551.9 1421.25   3
   5  -2  -1 64333.3 1407.59   1
   5   2  -1 69114.7 1432.72   3
  -5   2   0 6329.31 188.349   2
   5  -2   0 6134.57 182.299   2
   5   2   0 6406.40 203.303   3
  -5   2   0 6428.96 210.874   3
   5   2   0 6105.56 202.668   2
   5  -2   0 6772.51 210.104   3
  -5  -2   0 6499.17 216.410   3
   5  -2   0 6122.91 193.309   1
  -5  -2   0 6325.43 206.641   2
   5   2   1 35736.5 796.849   3
  -5  -2  -1 33120.1 789.911   2
  -5   2  -1 32636.8 765.931   2
  -5   2  -1 32729.3 803.457   3
  -5  -2  -1 33363.6 800.722   3
   5  -2   1 32459.5 766.284   2
   5  -2   1 37284.9 807.412   3
   5   2   2 1062.49 68.9883   3
   5  -2   2 913.724 51.5536   2
  -5   2  -2 911.651 52.5816   2
  -5  -2  -2 1021.22 65.3046   2
  -5   2  -2 907.128 70.3233   3
   5  -2   2 1056.04 73.3844   3
  -5  -2  -2 1021.18 70.4545   3
  -5   2  -3 15528.1 415.316   3
  -5   2  -3 14978.8 362.491   2
   5  -2   3 13784.0 351.818   2
  -5  -2  -3 15477.1 390.318   2
  -5  -2  -3 15242.1 407.383   3
   5  -2   3 15349.0 399.363   3
  -5  -2  -4 5631.10 189.798   2
  -5  -2  -4 5752.85 205.924   3
  -5   2  -4 5945.04 214.655   3
   5  -2   4 6416.44 202.122   3
  -5   2  -4 5557.31 165.304   2
   5  -2   5 72.4382 28.1942   3
  -5  -2  -5 58.3635 28.6057   3
  -5   2  -5 76.4755 14.5806   2
  -5   2  -5 70.6083 32.4874   3
  -5  -2  -6 1899.75 112.122   3
  -5   2  -6 2024.36 80.7173   2
  -5   2  -6 1936.31 110.814   3
  -5  -2  -7 4133.71 180.804   3
  -5   2  -7 4545.07 182.829   3
  -5   2  -7 4357.22 134.692   2
  -5   2  -8 2758.83 98.1580   2
  -5  -2  -8 2810.08 146.798   3
  -5   2  -8 2790.64 142.423   3
  -5  -2  -9 8514.56 307.383   3
  -5   2  -9 9270.17 239.771   2
  -5   2  -9 8893.41 303.030   3
  -5  -2 -10 372.053 60.8341   3
  -5   2 -10 456.732 37.0840   2
  -5   2 -10 478.896 63.5599   3
  -5   2 -11 14071.8 334.346   2
  -5   2 -11 12960.9 330.213   2
  -5   2 -11 12156.3 401.898   3
  -5  -2 -11 11486.1 407.308   3
  -5  -2 -12 3967.88 206.584   3
  -5   2 -12 4065.44 122.607   4
  -5   2 -12 4609.19 146.028   2
  -5   2 -12 4475.56 145.677   2
  -5   2 -12 4103.79 199.775   3
  -5   2 -13 1635.89 123.481   3
  -5   2 -13 1578.96 61.9713   4
  -5   2 -13 1873.34 85.2096   2
  -5  -2 -13 1628.01 128.317   3
  -5  -2 -14 922.810 102.024   3
  -5   2 -14 1046.47 64.6026   2
  -5   2 -14 933.782 95.0334   3
  -5  -2 -15 24.7659 26.3787   3
  -5  -2 -15 45.1056 15.0342   4
  -5   2 -15-27.5214 22.7982   3
  -5   2 -16 46.5719 38.6452   3
  -5  -2 -16-37.9858 26.5272   3
  -5  -2 -16 14.1828 19.4032   4
  -5  -2 -17 6433.05 320.444   3
  -5   2 -17 6735.74 305.723   3
  -5   2 -18 105.529 29.5532   3
  -5  -2 -18 247.345 74.9375   3
  -5  -2 -19 11235.0 481.103   3
  -5   2 -19 12845.7 475.787   3
  -5  -2 -20 44.8844 42.3171   3
  -5   2 -20 150.418 71.1573   3
  -5  -2 -21 11798.2 514.322   3
  -5   2 -21 12659.6 510.129   3
  -5  -2 -22 124.216 80.7212   3
   5  -3 -25 62.0026 70.8959   3
   5  -3 -24 215.201 61.3919   3
   5  -3 -23 1100.51 126.405   3
   5  -3 -22 4563.51 265.919   3
   5   3 -21 2977.05 167.283   3
   5  -3 -21 2650.36 189.032   3
   5   3 -20 7441.41 285.260   3
   5  -3 -20 6904.96 321.172   3
   5   3 -19 11223.8 359.343   3
   5  -3 -19 9843.90 396.819   3
   5   3 -18 11056.2 349.462   3
   5  -3 -18 10219.1 393.402   3
  -5  -3  18 10129.4 357.992   2
   5   3 -17 3624.93 167.453   3
   5  -3 -17 3156.99 187.103   3
  -5  -3  17 3612.57 178.723   2
   5  -3 -16 7647.01 308.160   3
   5   3 -16 8436.70 275.432   3
  -5  -3  16 7903.78 289.811   2
   5  -3 -15 2205.43 140.882   3
   5   3 -15 2399.71 122.609   3
  -5  -3  15 2349.83 137.367   2
   5  -3 -14 2994.28 160.111   5
  -5  -3  14 2999.20 150.795   2
  -5  -3  13 3219.66 153.367   2
   5  -3 -13 3147.95 160.808   5
  -5  -3  12 3333.77 154.233   2
  -5  -3  11 69.0269 27.6986   2
  -5  -3  10 11821.4 353.794   2
  -5   3  10 11926.5 356.941   2
  -5  -3   9 106.251 33.8495   2
  -5   3   9 134.804 31.5578   2
  -5  -3   8 38893.8 934.209   2
   5   3  -8 39885.9 890.462   3
  -5   3   8 38893.2 924.494   2
  -5  -3   7 1121.59 78.0196   2
   5   3  -7 1202.94 65.1171   3
  -5   3   7 1105.59 73.9819   2
   5   3  -6 10369.7 284.120   5
  -5  -3   6 10728.8 320.553   2
  -5   3   6 10479.6 304.298   2
   5   3  -6 11005.6 290.800   3
   5   3  -5 430.215 37.5941   5
   5   3  -5 448.643 55.8552   2
   5  -3  -5 416.038 44.1674   2
  -5   3   5 324.014 36.1021   2
  -5  -3   5 409.256 54.6149   2
   5   3  -5 363.659 45.3157   3
   5  -3  -4 30617.9 688.325   2
  -5  -3   4 29355.3 688.414   3
   5   3  -4 31270.0 721.844   2
  -5   3   4 29695.8 693.329   1
  -5  -3   4 28629.8 723.235   2
  -5   3   4 28647.7 688.273   2
   5   3  -4 27529.9 698.779   3
  -5  -3   3 2216.99 105.528   3
   5   3  -3 1952.94 57.5163   1
  -5   3   3 2417.59 97.2596   2
   5   3  -3 2141.91 110.858   2
   5  -3  -3 2528.26 102.230   2
  -5   3   3 2373.31 101.899   1
  -5  -3   3 2357.93 121.919   2
   5   3  -3 2282.70 104.661   3
   5  -3  -2 1190.00 67.9455   2
   5  -3  -2 1193.76 73.3911   3
  -5   3   2 1267.10 71.6262   1
  -5  -3   2 1141.75 79.5489   3
  -5   3   2 1192.80 62.5532   2
  -5  -3   2 1156.64 84.1509   2
   5   3  -2 1213.92 81.7195   2
   5   3  -2 1310.35 75.7898   3
   5  -3  -1 13571.2 340.077   2
   5  -3  -1 13973.2 358.199   1
  -5   3   1 12988.7 339.455   2
   5   3  -1 14212.3 362.406   3
  -5  -3   1 13773.9 377.534   3
  -5  -3   1 13279.8 376.152   2
   5   3  -1 13095.9 374.307   2
   5  -3  -1 14600.5 361.499   3
   5  -3   0 87.0240 27.4256   3
   5  -3   0 79.4427 24.4880   1
  -5  -3   0 93.7428 25.5549   2
   5  -3   0 51.9443 15.6811   2
  -5  -3   0 75.6451 29.4227   3
  -5   3   0 76.5877 16.1477   2
   5   3   0 96.4836 26.1791   3
   5   3   1 3881.13 140.983   3
  -5  -3  -1 3468.32 143.225   2
   5  -3   1 3369.22 115.450   2
  -5   3  -1 3617.48 146.005   3
  -5   3  -1 3628.97 116.859   2
   5  -3   1 4033.23 151.704   3
  -5  -3  -1 3609.89 146.831   3
   5  -3   1 3252.14 140.107   1
   5   3   2 20431.9 505.090   3
   5  -3   2 22512.7 517.439   3
   5  -3   2 18988.7 466.545   2
  -5   3  -2 19773.2 516.520   3
  -5  -3  -2 19893.4 515.183   3
  -5   3  -2 20324.6 465.578   2
  -5  -3  -2 19937.8 507.371   2
  -5   3  -3 23218.1 528.210   2
   5  -3   3 22119.0 525.763   2
  -5   3  -3 24052.0 592.747   3
  -5  -3  -3 24530.9 582.060   2
  -5  -3  -3 22908.8 586.577   3
   5  -3   3 25926.6 588.651   3
  -5   3  -4 36901.7 794.198   2
  -5   3  -4 36100.8 866.410   3
   5  -3   4 36817.7 848.653   3
  -5  -3  -4 35562.7 863.008   3
  -5   3  -5 10493.2 263.345   2
   5  -3   5 12156.9 321.090   3
  -5   3  -5 11503.2 339.249   3
  -5  -3  -5 11101.7 334.387   3
  -5  -3  -6 19335.0 496.666   3
  -5   3  -6 17007.3 402.707   2
  -5   3  -6 19787.5 495.540   3
  -5   3  -7 3804.89 108.261   2
  -5  -3  -7 4013.58 177.728   3
  -5   3  -7 3716.34 165.375   3
  -5  -3  -8 2919.76 150.042   3
  -5   3  -8 2918.17 88.8030   2
  -5   3  -8 2874.41 144.928   3
  -5   3  -9 2454.11 80.3700   2
  -5   3  -9 2399.69 134.272   3
  -5  -3  -9 2427.29 140.664   3
  -5  -3 -10 333.381 56.0947   3
  -5   3 -10 326.859 48.0607   3
  -5   3 -10 357.794 26.1922   2
  -5   3 -11 76.4449 12.8046   2
  -5  -3 -11 102.788 40.1337   3
  -5   3 -11 55.1735 16.1836   3
  -5   3 -12 1611.30 64.8766   2
  -5  -3 -12 1534.03 122.978   3
  -5   3 -12 1661.45 117.603   3
  -5  -3 -13 5188.00 247.633   3
  -5   3 -13 5234.29 149.281   2
  -5   3 -13 5081.60 231.959   3
  -5  -3 -14 8622.65 354.401   3
  -5   3 -14 9352.39 343.979   3
  -5  -3 -15 4430.05 245.721   3
  -5  -3 -15 4818.03 201.210   4
  -5   3 -15 4702.64 231.086   3
  -5  -3 -16 7085.94 336.966   3
  -5  -3 -16 8114.87 278.544   4
  -5   3 -16 7539.33 319.883   3
  -5  -3 -17 4103.52 184.800   4
  -5  -3 -17 3926.00 245.440   3
  -5   3 -17 3820.66 218.348   3
  -5  -3 -18 4045.89 257.973   3
  -5   3 -18 4324.96 240.155   3
  -5  -3 -19 2479.47 207.009   3
  -5   3 -19 2468.80 180.531   3
  -5  -3 -20 831.465 122.087   3
  -5   3 -20 975.755 120.580   3
  -5  -3 -21 288.061 84.0718   3
   5  -4 -24 5800.27 327.523   3
   5  -4 -23 1186.50 131.734   3
   5  -4 -22 4213.30 259.752   3
   5  -4 -21 1125.03 126.176   3
   5   4 -20 584.077 65.3522   3
   5  -4 -20 501.029 78.6089   3
   5   4 -19 738.324 76.8464   3
   5  -4 -19 733.527 96.5967   3
  -5  -4  19 795.771 81.8167   2
   5   4 -18 1046.67 85.5963   3
   5  -4 -18 1103.07 114.204   3
  -5  -4  18 993.904 88.5094   2
   5   4 -17 82.3387 25.7815   3
   5  -4 -17 54.1634 36.4379   3
  -5  -4  17 73.0597 42.1947   2
   5   4 -16 11520.3 338.919   3
   5  -4 -16 10663.8 395.806   3
  -5  -4  16 11469.7 364.875   2
   5   4 -15 2702.63 127.453   3
   5  -4 -15 2568.82 163.112   3
  -5  -4  15 2798.14 146.841   2
   5   4 -14 16712.6 438.865   3
   5  -4 -14 16509.4 491.149   5
  -5  -4  14 16664.0 471.226   2
  -5  -4  13 4643.12 198.403   2
   5  -4 -13 5062.19 214.714   5
  -5  -4  12 27218.7 693.496   2
  -5  -4  11 1145.67 88.1250   2
  -5  -4  10 6130.66 225.925   2
   5   4 -10 6350.15 195.753   3
  -5  -4   9 816.618 70.8366   2
   5   4  -9 742.061 58.4009   3
  -5  -4   8 187.529 40.2169   2
  -5   4   8 202.405 39.3594   2
   5   4  -8 187.484 26.8824   3
  -5   4   7 2955.07 135.686   2
   5   4  -7 3224.53 122.344   3
  -5  -4   7 3033.29 145.371   2
  -5  -4   6 10726.9 340.038   2
  -5   4   6 10790.5 318.351   2
   5   4  -6 11936.3 312.149   3
  -5  -4   5 4649.45 191.665   2
  -5   4   5 4562.28 168.135   2
   5   4  -5 5219.58 167.959   3
  -5   4   4 30893.3 742.551   1
  -5   4   4 30353.2 730.266   2
  -5  -4   4 31400.1 772.083   2
  -5  -4   4 30565.8 728.546   3
   5   4  -4 30489.0 729.443   3
   5  -4  -4 33570.7 731.176   2
   5   4  -3 357.135 37.0216   3
  -5   4   3 300.023 37.6971   1
   5  -4  -3 407.152 42.2038   2
   5   4  -3 307.142 23.4959   5
  -5  -4   3 269.379 48.3274   2
  -5   4   3 363.347 36.6030   2
  -5  -4   3 273.621 42.0426   3
  -5   4   3 358.917 37.9576   4
   5  -4  -2 66065.6 1472.98   2
   5   4  -2 68100.6 1485.28   3
  -5   4   2 65136.6 1472.58   2
  -5   4   2 66900.3 1498.47   1
  -5  -4   2 66914.5 1504.91   3
  -5  -4   2 63815.3 1516.02   2
   5   4  -1 109.210 28.5025   3
   5  -4  -1 84.0718 25.9608   3
   5  -4  -1 46.6245 17.4439   2
  -5  -4   1 46.7232 26.0020   2
   5  -4  -1 78.6977 27.5411   1
  -5  -4   1 66.0530 25.4621   3
  -5   4   1 103.778 28.6311   1
  -5   4   1 113.258 21.5962   2
   5   4   0 60063.0 1280.52   3
   5  -4   0 57154.3 1252.24   2
  -5  -4   0 54353.2 1293.57   2
   5  -4   0 55560.7 1278.48   3
  -5   4   0 52229.6 1243.53   2
  -5  -4   0 57575.8 1294.81   3
  -5  -4  -1 55.7941 28.2208   2
   5   4   1 94.6861 28.6151   3
   5  -4   1 77.2072 20.6670   3
   5  -4   1 104.284 16.4758   2
  -5   4  -1 50.6243 15.0596   2
  -5  -4  -1 86.7654 20.6707   3
  -5  -4  -2 2471.69 118.822   3
   5  -4   2 2201.22 82.6676   2
  -5  -4  -2 2519.09 118.916   2
  -5   4  -2 2397.64 81.1877   2
   5  -4   2 2749.50 119.944   3
  -5   4  -2 2454.01 116.174   3
   5  -4   3 878.573 65.2472   3
  -5  -4  -3 898.408 68.9998   3
  -5   4  -3 830.305 38.9687   2
   5  -4   3 852.015 41.1836   2
  -5  -4  -3 809.840 65.2057   2
  -5   4  -3 827.615 66.8857   3
   5  -4   4 41.6907 24.8914   3
  -5   4  -4 42.5844 28.7428   3
  -5   4  -4 12.4996 6.97124   2
  -5  -4  -4 36.7436 21.5836   3
   5  -4   5 2581.18 110.196   3
  -5  -4  -5 2706.77 125.156   3
  -5   4  -5 2432.68 116.962   3
  -5  -4  -6 2992.49 150.654   3
   5  -4   6 3453.85 139.873   3
  -5   4  -6 3168.20 147.771   3
  -5  -4  -7 12292.0 379.849   3
  -5   4  -7 12425.6 371.055   3
  -5  -4  -8 13100.3 398.284   3
  -5   4  -8 12338.0 381.069   3
  -5  -4  -9 1850.50 123.727   3
  -5   4  -9 1854.32 58.2024   4
  -5   4  -9 1947.41 115.293   3
  -5  -4 -10 25466.7 688.563   3
  -5   4 -10 24504.1 651.532   3
  -5  -4 -11 3272.10 184.217   3
  -5   4 -11 2943.96 156.836   3
  -5  -4 -12 15692.3 501.183   3
  -5   4 -12 15120.4 459.902   3
  -5  -4 -13 6397.68 288.736   3
  -5   4 -13 6179.14 255.068   3
  -5  -4 -14 1159.83 113.908   3
  -5   4 -14 1016.85 96.9941   3
  -5  -4 -15 75.5670 21.8958   4
  -5  -4 -15 122.394 48.4126   3
  -5   4 -15 180.113 41.0000   3
  -5  -4 -16 298.592 79.5832   3
  -5  -4 -16 233.036 44.5767   4
  -5   4 -16 162.185 28.5535   3
  -5  -4 -17 258.850 68.2143   3
  -5  -4 -17 260.957 50.2790   4
  -5   4 -17 222.678 37.2131   3
  -5  -4 -18 4644.97 286.562   3
  -5   4 -18 5034.87 255.053   3
  -5  -4 -19 280.542 74.2413   3
  -5  -4 -20 5156.48 321.147   3
  -5  -4 -21 178.186 79.3349   3
   5  -5 -24 193.024 62.8182   3
   5  -5 -23 1495.09 164.309   3
   5  -5 -22 939.319 133.586   3
   5  -5 -21 4930.38 281.671   3
   5  -5 -20 1560.26 149.186   3
   5  -5 -19 7038.17 332.521   3
  -5  -5  19 7762.57 289.965   2
   5   5 -18 4276.62 173.885   3
   5  -5 -18 3806.41 228.080   3
  -5  -5  18 4049.39 191.728   2
   5   5 -17 8279.38 265.399   3
  -5  -5  17 8317.49 295.487   2
   5  -5 -17 7602.99 330.784   3
   5  -5 -16 2771.77 178.659   3
   5   5 -16 2959.87 133.586   3
  -5  -5  16 2765.47 150.573   2
   5  -5 -15 1115.93 98.0983   5
   5   5 -15 1146.82 74.2230   3
   5  -5 -15 1141.70 104.879   3
  -5  -5  15 1081.95 87.6681   2
   5  -5 -14 3645.20 182.781   5
  -5  -5  14 3771.13 174.506   2
   5   5 -14 3770.23 143.708   3
   5  -5 -14 3516.72 190.818   3
  -5  -5  13 5304.44 212.134   2
  -5  -5  12 941.058 80.0885   2
   5   5 -12 1009.99 60.5530   3
  -5  -5  11 13849.2 417.498   2
   5   5 -11 14914.6 372.841   3
  -5  -5  10 400.268 50.9574   2
   5   5 -10 413.468 38.8422   3
  -5  -5   9 45011.3 1090.10   2
   5   5  -9 47549.1 1031.07   3
  -5  -5   8 3050.90 153.233   2
   5   5  -8 3142.85 121.929   3
  -5  -5   7 49715.2 1247.40   2
   5   5  -7 56271.2 1202.24   3
  -5  -5   6 50.1984 24.7917   2
   5   5  -6 74.8165 13.3322   3
  -5  -5   5 23369.6 621.770   2
   5   5  -5 23844.6 565.910   3
  -5   5   5 23662.4 597.431   1
  -5  -5   4 223.305 41.2650   2
   5   5  -4 265.223 32.1207   3
  -5   5   4 204.907 33.4704   1
  -5  -5   4 234.178 38.6708   3
  -5   5   3 13421.2 377.741   1
   5   5  -3 13514.8 347.321   3
  -5  -5   3 13157.2 366.126   3
   5  -5  -3 14401.1 354.594   2
  -5  -5   3 12343.6 389.853   2
   5   5  -2 2096.80 92.7733   3
  -5  -5   2 1939.40 112.493   2
  -5   5   2 2014.74 96.5689   4
  -5  -5   2 1922.52 103.885   3
  -5   5   2 1915.01 105.477   1
   5  -5  -2 2126.22 91.4422   2
   5  -5  -1 103.483 23.0552   2
   5   5  -1 87.5067 20.9979   3
  -5   5   1 85.8668 23.9271   1
   5  -5  -1 114.248 33.2846   3
  -5  -5   1 96.8840 34.3166   2
  -5  -5   1 93.0334 35.7899   3
  -5   5   1 79.8833 24.3746   4
  -5  -5   0 37.6512 24.7413   3
   5  -5   0 22.1121 10.8412   2
   5   5   0 39.7072 16.2679   3
  -5   5   0 28.3751 14.6870   4
   5  -5   0 38.7000 17.4204   3
  -5  -5   0 36.8786 27.8537   2
   5  -5   1 1537.13 67.3847   2
  -5  -5  -1 1512.34 91.8568   2
  -5   5  -1 1414.20 72.0671   4
   5  -5   1 1545.03 86.0385   3
  -5  -5  -1 1365.81 87.0596   3
   5  -5   2 940.874 46.0570   2
  -5   5  -2 894.300 53.6744   4
  -5  -5  -2 923.914 76.2822   2
   5  -5   2 1012.56 70.8778   3
  -5  -5  -2 949.168 73.8703   3
  -5  -5  -3 38529.7 879.175   3
   5  -5   3 39490.1 867.635   3
  -5   5  -3 37816.7 819.035   4
  -5  -5  -4 2317.29 118.663   3
  -5   5  -4 2227.49 79.5448   4
  -5   5  -4 2332.70 110.653   3
   5  -5   4 2339.42 108.073   3
  -5  -5  -5 27086.6 683.807   3
  -5   5  -5 26189.3 603.570   4
  -5   5  -5 26107.3 661.399   3
   5  -5   5 28220.5 653.657   3
   5  -5   6 2114.15 103.331   3
  -5  -5  -6 1865.43 117.086   3
  -5   5  -6 1931.55 72.8044   4
  -5   5  -6 1907.80 109.367   3
  -5  -5  -7 15859.6 469.159   3
  -5   5  -7 16345.3 447.387   3
  -5   5  -7 16097.7 370.630   4
  -5  -5  -8 153.725 34.8463   3
   5   5   8 132.454 16.2842   5
  -5   5  -8 141.491 14.3595   4
  -5   5  -8 152.923 35.4312   3
  -5  -5  -9 191.585 56.1066   3
   5   5   9 81.6426 17.6544   5
  -5   5  -9 103.577 34.3884   3
  -5  -5 -10 305.691 58.3307   3
  -5   5 -10 361.431 50.7434   3
  -5  -5 -11 2380.50 158.867   3
  -5   5 -11 2522.14 142.635   3
  -5  -5 -12 384.716 72.8463   3
  -5   5 -12 382.751 56.4757   3
  -5  -5 -13 3741.90 214.818   3
  -5   5 -13 3669.46 182.116   3
  -5  -5 -14 3741.30 227.202   3
  -5   5 -14 3607.81 187.328   3
  -5  -5 -15 10482.3 427.136   3
  -5   5 -15 9901.05 361.317   3
  -5  -5 -15 11368.1 380.531   4
  -5  -5 -16 4924.03 285.196   3
  -5   5 -16 4778.50 231.086   3
  -5  -5 -16 5411.48 242.107   4
  -5  -5 -17 9820.75 436.913   3
  -5  -5 -17 11132.9 377.195   4
  -5   5 -17 9346.67 367.073   3
  -5  -5 -18 1944.07 183.486   3
  -5  -5 -18 2085.13 147.138   4
  -5  -5 -19 1777.55 181.933   3
  -5  -5 -20 500.275 117.465   3
   5  -6 -23 9415.16 440.897   3
   5  -6 -22 4390.72 281.595   3
   5  -6 -21 4261.32 267.584   3
   5  -6 -20 1829.74 167.738   3
   5  -6 -19 487.013 97.9110   3
  -5  -6  19 534.388 73.2359   2
  -5  -6  18 73.5154 38.0414   2
   5  -6 -18 34.7097 33.5804   3
   5  -6 -17 3249.71 201.108   3
  -5  -6  17 3242.85 165.097   2
   5   6 -16 134.965 23.7170   3
   5  -6 -16 179.689 53.9162   3
  -5  -6  16 87.7657 38.1669   2
   5   6 -15 7181.32 216.854   3
   5  -6 -15 7382.33 287.432   5
  -5  -6  15 6765.54 254.507   2
   5  -6 -15 6244.06 285.251   3
  -5  -6  14 141.142 40.8188   2
   5   6 -14 216.374 30.7119   3
   5  -6 -14 204.970 46.2409   5
   5  -6 -14 166.650 43.8692   3
   5   6 -13 13073.4 330.591   3
  -5  -6  13 12216.3 385.333   2
  -5  -6  12 548.912 66.1338   2
   5   6 -12 537.634 43.6225   3
  -5  -6  11 14886.0 434.347   2
   5   6 -11 14661.0 380.457   3
  -5  -6  11 14743.1 348.258   1
  -5  -6  10 1843.67 117.691   2
  -5  -6  10 1749.36 63.8299   1
   5   6 -10 2038.08 91.2474   3
  -5  -6   9 5974.54 235.824   2
   5   6  -9 6510.64 194.941   3
  -5  -6   8 1150.34 93.5803   2
   5   6  -8 1097.79 58.8417   3
  -5  -6   7 1519.77 107.376   2
   5   6  -7 1602.02 74.7796   3
  -5  -6   6 4120.76 189.809   2
   5   6  -6 4405.30 142.031   3
   5   6  -5 1832.74 79.8289   3
  -5  -6   5 1787.58 115.002   2
  -5   6   5 1783.35 106.545   1
  -5  -6   5 1604.55 83.3073   3
   5   6  -4 7241.76 200.123   3
  -5   6   4 6447.38 236.002   1
  -5  -6   4 6435.37 212.526   3
  -5  -6   4 6624.55 253.124   2
  -5  -6   3 17407.1 509.513   2
   5   6  -3 18896.2 457.852   3
  -5   6   3 18749.9 507.812   1
   5  -6  -3 19780.3 473.389   2
  -5  -6   3 19202.1 489.268   3
   5   6  -2 1803.61 83.8002   3
  -5  -6   2 1770.57 107.421   2
  -5   6   2 1697.47 104.309   1
  -5  -6   2 1748.89 99.4605   3
   5  -6  -2 1969.47 89.6815   2
   5   6  -1 33723.7 767.400   3
  -5  -6   1 30188.6 803.114   2
   5  -6  -1 35019.4 788.356   3
  -5  -6   1 33067.6 791.341   3
   5  -6  -1 34071.8 759.740   2
  -5   6   1 32015.5 807.508   1
   5   6   0 419.066 44.0697   3
  -5  -6   0 446.832 56.1273   2
  -5   6   0 441.936 44.9900   4
   5  -6   0 484.179 50.0352   3
   5  -6   0 461.126 37.6735   2
  -5  -6   0 461.502 50.8367   3
   5  -6   1 12983.2 315.530   2
   5  -6   1 12864.8 347.012   3
  -5  -6  -1 12002.3 367.542   2
  -5  -6  -1 12339.1 358.439   3
  -5   6  -1 12379.2 329.645   4
   5  -6   2 214.387 21.5585   2
   5  -6   2 247.324 37.1979   3
  -5   6  -2 256.328 33.4483   4
  -5  -6  -2 234.711 42.5307   3
  -5  -6  -2 210.606 39.5792   2
  -5  -6  -3 83.0338 34.4250   3
   5  -6   3 72.3290 9.43626   2
  -5   6  -3 100.021 17.6557   4
   5  -6   3 169.140 32.9192   3
  -5  -6  -4 1658.25 105.841   3
  -5   6  -4 1491.62 71.0505   4
   5  -6   4 1641.43 94.3749   3
   5  -6   5 134.238 21.3598   3
  -5  -6  -5 134.077 39.9581   3
  -5   6  -5 134.020 18.8755   4
  -5  -6  -6 9009.30 307.837   3
  -5   6  -6 8708.33 277.996   3
   5  -6   6 9398.61 270.904   3
  -5   6  -6 8787.53 228.976   4
   5  -6   7 18097.7 455.466   3
  -5   6  -7 16801.2 468.827   3
  -5  -6  -7 17497.5 507.852   3
  -5   6  -8 14176.8 402.647   3
  -5  -6  -8 14010.7 440.389   3
  -5  -6  -9 19857.5 588.424   3
  -5   6  -9 20930.0 547.412   3
  -5  -6 -10 8858.63 334.195   3
  -5   6 -10 8457.27 286.974   3
  -5  -6 -11 14946.3 493.411   3
  -5   6 -11 15154.0 438.265   3
  -5  -6 -12 8775.04 350.639   3
  -5   6 -12 8460.61 296.360   3
  -5  -6 -13 5365.05 269.985   3
  -5   6 -13 5065.20 221.255   3
  -5  -6 -14 3599.56 229.140   3
  -5   6 -14 3685.84 184.009   3
  -5  -6 -15 1344.41 142.019   3
  -5   6 -15 1241.43 102.824   3
  -5  -6 -15 1442.36 115.546   4
  -5  -6 -16 480.598 92.2179   3
  -5  -6 -16 372.570 54.0545   4
  -5  -6 -17 344.019 48.0358   4
  -5  -6 -17 414.806 91.8148   3
  -5  -6 -18 465.995 112.754   3
  -5  -6 -18 436.572 54.6284   4
  -5  -6 -19 2551.43 221.386   3
  -5  -6 -20 1020.45 140.762   3
   5  -7 -22 3154.32 242.285   3
   5  -7 -21 637.195 109.397   3
   5  -7 -20 5208.05 293.772   3
   5  -7 -19 1321.87 139.209   3
   5  -7 -18 8695.16 378.697   3
  -5  -7  18 9244.23 320.640   2
  -5  -7  17 852.174 81.9593   2
   5  -7 -17 725.735 103.150   3
   5  -7 -16 2024.24 151.672   3
   5  -7 -16 2307.52 153.597   5
  -5  -7  16 2280.26 132.933   2
   5  -7 -15 1883.47 144.644   3
  -5  -7  15 1876.54 119.996   2
   5  -7 -15 1779.10 128.977   5
   5   7 -14 63.4464 17.3476   3
  -5  -7  14 53.0850 34.6517   2
   5  -7 -14 13.3804 19.7910   3
  -5  -7  13 1081.55 88.2081   2
   5   7 -13 1009.85 52.7581   3
   5  -7 -13 944.526 95.0026   3
  -5  -7  12 6220.40 238.899   2
   5   7 -12 6050.38 168.820   3
  -5  -7  11 37.3549 25.3326   2
  -5  -7  11 19.0836 13.9603   1
   5   7 -11 34.1353 9.13839   3
  -5  -7  10 31722.7 836.219   2
   5   7 -10 33856.2 748.615   3
   5   7  -9 41.0763 6.71870   3
  -5  -7   9 72.5953 48.1791   2
   5   7  -8 62277.9 1317.91   3
  -5  -7   8 56364.2 1419.78   2
   5   7  -7 335.132 27.9416   3
  -5  -7   7 302.926 51.2689   2
  -5  -7   6 34277.1 909.908   2
   5   7  -6 37125.5 811.426   3
  -5  -7   5 22.5746 32.8171   2
   5   7  -5 21.1414 13.4356   3
  -5   7   5-0.47055 23.4949   1
  -5  -7   5 35.1495 26.6092   3
   5   7  -4 26119.4 594.071   3
  -5   7   4 26581.8 671.368   1
  -5  -7   4 26003.1 624.177   3
  -5  -7   4 26073.3 682.536   2
   5   7  -4 24970.8 574.832   1
   5   7  -3 219.809 24.7863   1
   5   7  -3 221.099 27.1780   3
  -5  -7   3 205.682 46.3947   2
  -5  -7   3 224.163 37.4693   3
  -5   7   3 252.591 45.1941   1
   5   7  -2 3738.28 134.608   3
  -5  -7   2 3627.36 169.755   2
  -5   7   2 3700.43 171.298   1
   5  -7  -2 4069.52 143.342   2
  -5  -7   2 3650.80 150.785   3
   5   7  -1 814.942 57.5914   3
  -5  -7   1 797.106 72.4146   2
  -5  -7   1 799.561 66.6811   3
   5  -7  -1 827.527 55.1971   2
  -5   7   1 791.092 74.7530   1
  -5   7   0 8764.85 304.518   1
  -5  -7   0 8752.35 304.905   2
  -5  -7   0 9630.81 289.896   3
   5  -7   0 9719.44 257.151   2
   5  -7   1 2325.66 112.508   3
   5  -7   1 2553.56 94.6544   2
  -5  -7  -1 2280.61 133.493   2
  -5  -7  -1 2330.72 120.512   3
  -5  -7  -2 15827.1 464.118   3
  -5   7  -2 16269.7 428.119   4
   5  -7   2 18168.7 456.741   3
   5  -7   2 18005.5 409.777   2
  -5  -7  -3 2407.76 130.129   3
   5  -7   3 2380.74 83.1444   2
  -5   7  -3 2426.97 101.480   4
   5  -7   3 2904.86 125.710   3
  -5  -7  -4 20338.2 399.980   3
  -5   7  -4 19322.8 302.252   4
   5  -7   4 21692.2 366.441   3
   5  -7   5 225.021 32.2564   3
  -5  -7  -5 208.260 46.5352   3
   5  -7   6 25211.4 609.189   3
  -5  -7  -6 24285.2 663.519   3
  -5  -7  -7 2618.62 154.671   3
   5  -7   7 2458.64 114.256   3
  -5  -7  -8 5226.91 232.569   3
  -5   7  -8 4895.65 189.184   3
  -5  -7  -9 876.289 93.2871   3
  -5   7  -9 906.524 72.4777   3
  -5  -7 -10 137.683 49.9675   3
  -5   7 -10 165.510 42.5762   3
  -5  -7 -11 157.373 37.0428   3
  -5   7 -11 145.673 30.5486   3
  -5  -7 -12 3637.75 214.783   3
  -5   7 -12 3782.94 170.900   3
  -5  -7 -13 663.252 96.7389   3
  -5   7 -13 735.116 73.5547   3
  -5  -7 -14 8473.38 374.671   3
  -5   7 -14 8228.00 292.292   3
  -5  -7 -15 645.668 101.553   3
  -5  -7 -15 533.374 72.7276   4
  -5  -7 -16 8784.82 415.680   3
  -5  -7 -16 9338.01 373.502   4
  -5  -7 -17 309.095 79.8944   3
  -5  -7 -17 279.099 48.8205   4
  -5  -7 -18 4273.72 293.045   3
  -5  -7 -18 5010.76 258.193   4
  -5  -7 -19 64.6939 30.1954   3
   5  -8 -22 7563.28 396.865   3
   5  -8 -21 3511.16 244.333   3
   5  -8 -20 374.064 71.2868   3
   5  -8 -19 178.256 69.0407   3
   5  -8 -18 46.0246 31.9756   3
   5  -8 -17 1673.60 150.397   3
  -5  -8  17 1872.50 123.055   2
   5  -8 -16 2235.20 169.675   3
   5  -8 -16 2134.45 146.724   5
  -5  -8  16 2150.46 129.118   2
   5  -8 -15 2863.18 169.025   5
   5  -8 -15 3050.52 190.664   3
  -5  -8  15 3127.31 158.082   2
   5  -8 -14 7736.72 321.735   3
  -5  -8  14 8052.75 284.611   2
  -5  -8  13 6472.01 248.943   2
   5  -8 -13 6543.18 282.390   3
  -5  -8  12 8635.16 283.404   2
   5  -8 -12 8317.11 303.751   3
  -5  -8  11 4635.88 192.539   2
   5   8 -11 2613.97 77.7964   3
  -5  -8  10 8922.35 317.348   2
   5   8  -9 1010.59 43.8197   3
  -5  -8   9 1304.93 106.517   2
   5   8  -8 2372.66 78.2813   3
  -5  -8   8 2465.37 148.927   2
   5   8  -7 829.823 41.8540   3
  -5  -8   7 826.297 84.8205   2
   5   8  -6 308.517 26.6980   3
  -5  -8   6 261.017 57.3839   2
  -5   8   5 1015.25 90.0275   1
   5   8  -5 1057.10 53.2265   3
  -5  -8   5 976.970 65.7022   3
  -5  -8   5 1167.47 96.4348   2
   5   8  -4 2103.13 80.4257   1
   5   8  -4 2117.17 86.0451   3
  -5   8   4 1910.25 122.948   1
  -5  -8   4 2037.80 130.372   2
  -5  -8   4 2111.11 103.426   3
  -5  -8   3 11495.8 370.399   2
   5   8  -3 11356.5 294.630   1
   5   8  -3 11821.9 302.403   3
  -5   8   3 11537.9 370.820   1
  -5  -8   3 11752.9 338.812   3
  -5  -8   2 7392.38 236.546   3
   5   8  -2 6930.41 206.848   3
  -5  -8   2 6690.24 257.743   2
  -5   8   2 6937.61 262.393   1
  -5  -8   1 8436.24 298.509   2
  -5   8   1 7870.02 293.051   1
   5  -8  -1 8902.64 251.270   2
  -5  -8   1 8512.45 273.301   3
  -5   8   0 10423.0 349.477   1
  -5  -8   0 10482.7 350.535   2
   5  -8   0 10892.6 291.185   2
  -5  -8   0 10728.0 323.652   3
   5  -8   1 5050.01 158.209   2
  -5  -8  -1 4640.39 209.217   2
  -5  -8  -1 4825.74 193.307   3
   5  -8   2 1121.42 56.9439   2
   5  -8   2 1053.22 72.6430   3
  -5  -8  -2 944.194 80.9646   3
  -5  -8  -3 82.1409 30.6970   3
   5  -8   3 91.4857 14.6066   2
   5  -8   3 106.945 24.5375   3
  -5  -8  -4 2232.93 126.320   3
   5  -8   4 2312.00 106.375   3
  -5  -8  -5 3232.59 165.950   3
   5  -8   5 3436.34 139.714   3
  -5  -8  -6 3799.96 189.342   3
   5  -8   6 3767.48 146.632   3
  -5  -8  -7 14771.8 463.787   3
  -5  -8  -8 15387.7 485.535   3
  -5  -8  -9 15031.4 487.571   3
  -5  -8 -10 14373.8 485.471   3
  -5  -8 -11 11073.7 417.460   3
  -5  -8 -12 5879.40 288.503   3
  -5   8 -12 5150.47 201.582   3
  -5  -8 -13 9726.02 407.286   3
  -5  -8 -14 3359.26 224.971   3
  -5  -8 -15 865.565 127.306   3
  -5  -8 -15 793.354 92.6963   4
  -5  -8 -16 4.18990 52.8107   3
  -5  -8 -16 45.3234 24.6978   4
  -5  -8 -17 316.125 93.4277   3
  -5  -8 -17 247.970 62.9581   4
  -5  -8 -18 1527.20 184.145   3
  -5  -8 -18 1923.05 166.393   4
  -5  -8 -19 1641.59 159.192   4
   5  -9 -21 3525.48 257.336   3
   5  -9 -20 86.3903 39.2491   3
   5  -9 -19 6826.76 352.418   3
   5  -9 -18 50.9287 24.0037   3
   5  -9 -17 8388.81 374.052   3
   5  -9 -16 334.999 64.4724   3
   5  -9 -16 296.904 56.8687   5
  -5  -9  16 308.816 50.2492   2
   5  -9 -15 3978.71 205.955   5
   5  -9 -15 3925.87 231.843   3
  -5  -9  15 4143.42 190.749   2
  -5  -9  14 99.5594 41.2609   2
   5  -9 -14 140.040 52.1255   3
  -5  -9  13 347.704 53.1653   2
   5  -9 -13 252.225 46.4023   3
  -5  -9  12 1023.59 95.2027   2
   5  -9 -12 949.582 106.828   3
  -5  -9  11 13159.0 410.318   2
   5  -9 -11 12106.4 421.257   3
  -5  -9  10 118.398 51.5779   2
  -5  -9   9 26268.5 718.745   2
  -5  -9   8 13.9355 15.5174   2
   5   9  -7 29919.4 666.097   3
  -5  -9   7 32013.9 823.532   2
  -5  -9   6 267.154 52.5307   2
   5   9  -6 390.230 30.6858   3
  -5   9   6 348.256 59.8942   1
  -5   9   5 11384.4 378.441   1
  -5  -9   5 11070.1 307.354   3
   5   9  -5 11365.3 284.795   3
  -5  -9   5 11705.4 391.123   2
  -5  -9   4 31.8080 17.3737   2
   5   9  -4 47.5014 17.7116   3
  -5   9   4 14.4474 24.2792   1
   5   9  -4 9.11719 12.8669   1
  -5  -9   4 36.6542 28.3825   3
  -5  -9   3 9208.22 324.946   2
   5   9  -3 9275.33 255.725   1
   5   9  -3 9274.02 256.491   3
  -5  -9   3 9419.26 290.915   3
  -5   9   3 9421.01 329.483   1
   5   9  -2 431.760 38.2684   3
  -5  -9   2 481.334 67.2741   2
  -5   9   2 491.049 67.3276   1
  -5  -9   2 450.413 53.4910   3
  -5  -9   1 557.048 70.9366   2
  -5   9   1 556.073 68.7343   1
  -5  -9   1 559.549 62.7770   3
  -5  -9   0 388.708 55.0307   3
  -5   9   0 413.983 61.1670   1
  -5  -9   0 311.379 53.5581   2
  -5  -9  -1 11362.1 394.664   2
   5  -9   1 12916.7 326.869   2
  -5  -9  -1 11716.5 364.802   3
  -5  -9  -2 1509.49 106.012   3
   5  -9   2 1751.93 78.2016   2
   5  -9   3 19937.8 509.191   3
  -5  -9  -3 19101.7 538.286   3
   5  -9   3 18954.0 455.689   2
  -5  -9  -4 64.7147 33.6622   3
   5  -9   4 15.9320 11.9335   2
   5  -9   4 27.9373 23.8606   3
  -5  -9  -5 11520.8 382.032   3
  -5  -9  -6 35.8586 33.6861   3
  -5  -9  -7 14786.4 473.688   3
  -5  -9  -8-2.33431 17.3227   3
  -5  -9  -9 634.379 85.2238   3
  -5  -9 -10 14.5380 34.1038   3
  -5  -9 -11 2978.35 197.331   3
  -5  -9 -12 54.0486 28.0520   3
  -5  -9 -13 6282.84 320.984   3
  -5  -9 -14 41.1854 35.1972   3
  -5  -9 -14 81.9239 45.0978   4
  -5  -9 -15 5398.77 312.498   3
  -5  -9 -15 6171.30 303.145   4
  -5  -9 -16 151.313 65.7803   3
  -5  -9 -16 192.461 30.1283   4
  -5  -9 -17 11166.8 515.785   3
  -5  -9 -17 12675.1 487.557   4
  -5  -9 -18 100.393 73.4894   3
  -5  -9 -18-9.53841 34.6226   4
  -5  -9 -19 793.209 102.641   4
   5 -10 -20 433.991 96.5361   3
   5 -10 -19 304.677 70.7462   3
   5 -10 -18 687.981 103.669   3
   5 -10 -17 182.683 63.3370   3
   5 -10 -16 4358.62 260.117   3
   5 -10 -16 4609.22 231.408   5
   5 -10 -15 3433.96 222.607   3
   5 -10 -15 3618.10 195.797   5
  -5 -10  15 3596.23 177.543   2
  -5 -10  14 10023.3 338.320   2
   5 -10 -14 9561.42 386.799   3
  -5 -10  13 6342.28 253.391   2
   5 -10 -13 5856.57 281.155   3
  -5 -10  12 9390.83 334.168   2
   5 -10 -12 8641.52 347.627   3
  -5 -10  11 3572.31 185.092   2
   5 -10 -11 3436.03 192.149   3
  -5 -10  10 2885.17 169.941   2
   5 -10 -10 2660.52 167.533   3
  -5 -10   9 696.058 85.5101   2
  -5 -10   8 123.043 51.9126   2
  -5  10   7-7.80335 28.4860   1
  -5 -10   7 44.1043 31.8876   2
  -5  10   6 2030.80 137.990   1
   5  10  -6 1583.71 72.7774   3
  -5 -10   6 2093.51 148.743   2
  -5 -10   5 758.729 81.0127   2
   5  10  -5 717.099 45.3541   3
  -5 -10   5 749.201 59.1592   3
  -5  10   5 656.945 84.2618   1
   5  10  -4 11590.4 310.823   1
  -5 -10   4 11668.2 327.491   3
  -5  10   4 11192.9 383.589   1
   5  10  -4 11134.8 294.049   3
  -5 -10   4 11189.3 386.189   2
  -5 -10   3 3323.38 178.043   2
   5  10  -3 3396.18 125.523   3
   5  10  -3 3409.50 132.068   1
  -5  10   3 3513.58 188.002   1
  -5 -10   3 3439.89 154.257   3
   5  10  -2 24477.9 591.328   1
  -5 -10   2 24003.0 668.100   2
  -5  10   2 24462.6 676.507   1
  -5 -10   2 23798.7 614.829   3
  -5 -10   1 1611.20 123.211   2
  -5  10   1 1675.30 130.633   1
  -5 -10   1 1869.90 112.497   3
  -5  10   0 24670.3 688.535   1
  -5 -10   0 24094.5 678.410   2
  -5 -10   0 25280.7 642.334   3
  -5 -10  -1 153.162 42.0860   3
  -5 -10  -1 201.590 46.1448   2
  -5 -10  -2 4433.61 198.678   3
  -5 -10  -2 4350.54 216.373   2
  -5 -10  -3 914.494 84.9826   3
  -5 -10  -4 491.828 65.9052   3
  -5 -10  -5 7247.32 287.042   3
  -5 -10  -6 616.987 76.1144   3
  -5 -10  -7 14253.4 474.589   3
  -5 -10  -8 6009.52 277.358   3
  -5 -10  -9 12285.8 444.047   3
  -5 -10 -10 12259.0 455.332   3
  -5 -10 -11 16147.8 562.984   3
  -5 -10 -12 7559.92 354.323   3
  -5 -10 -13 9216.99 408.533   3
  -5 -10 -14 1325.08 150.998   3
  -5 -10 -14 1160.66 127.933   4
  -5 -10 -15 951.601 140.151   3
  -5 -10 -15 880.613 104.397   4
  -5 -10 -16 700.262 132.557   3
  -5 -10 -16 782.931 94.1281   4
  -5 -10 -17 561.738 110.912   3
  -5 -10 -17 691.547 88.9841   4
  -5 -10 -18 2583.11 208.116   4
   5 -11 -19 832.255 121.202   3
   5 -11 -18 4494.93 281.560   3
   5 -11 -17 632.141 107.905   3
   5 -11 -16 2613.19 200.729   3
   5 -11 -16 3097.74 185.129   5
   5 -11 -15 581.674 96.7739   3
   5 -11 -15 614.979 78.6799   5
  -5 -11  14 1304.42 108.260   2
   5 -11 -14 1131.84 117.780   3
  -5 -11  13 485.409 67.4643   2
   5 -11 -13 395.845 69.7838   3
  -5 -11  12 2073.94 140.859   2
   5 -11 -12 1873.02 150.278   3
  -5 -11  11 123.132 39.1530   2
   5 -11 -11 124.774 44.1942   3
   5 -11 -10 13070.3 451.444   3
  -5 -11  10 14288.8 461.827   2
   5 -11  -9 140.220 51.8758   3
  -5 -11   9 89.6634 50.4639   2
   5 -11  -8 16888.0 512.772   3
  -5 -11   8 17216.2 544.467   2
  -5 -11   7 151.255 60.5160   2
  -5  11   7 79.8108 41.3086   1
  -5  11   6 6068.63 269.084   1
  -5 -11   6 6330.11 288.583   2
  -5 -11   5 216.846 59.6323   2
  -5 -11   5 158.997 33.6717   3
  -5  11   5 197.758 41.4905   1
  -5 -11   4 12074.1 417.072   2
   5  11  -4 11848.7 332.326   1
  -5  11   4 11598.9 413.179   1
  -5 -11   4 12651.9 347.020   3
  -5  11   3 370.026 60.7997   1
   5  11  -3 344.912 38.0276   1
  -5 -11   3 424.375 69.8167   2
  -5 -11   3 367.134 52.9661   3
   5  11  -2 980.514 70.3197   1
  -5 -11   2 945.094 99.3225   2
  -5 -11   2 933.996 80.0405   3
  -5  11   2 1016.67 100.811   1
  -5  11   1 1288.35 115.624   1
  -5 -11   1 1199.13 109.536   2
  -5 -11   1 1153.40 87.5585   3
  -5  11   0 4876.21 233.557   1
  -5 -11   0 4324.33 218.297   2
  -5 -11   0 4510.78 193.647   3
  -5 -11  -1 2673.82 166.555   2
  -5 -11  -1 2563.75 146.462   3
  -5 -11  -2 20333.5 620.638   2
  -5 -11  -2 20962.9 582.355   3
  -5 -11  -3 2384.52 149.056   3
  -5 -11  -4 19656.8 577.357   3
  -5 -11  -5 2666.31 165.045   3
  -5 -11  -6 11255.2 402.661   3
  -5 -11  -7 1885.92 146.733   3
  -5 -11  -8 5009.22 257.372   3
  -5 -11  -9 1093.81 121.999   3
  -5 -11 -10 392.743 81.6636   3
  -5 -11 -11 115.890 68.1662   3
  -5 -11 -12 1755.11 163.473   3
  -5 -11 -13 140.189 55.2032   3
  -5 -11 -13 72.4072 46.8343   4
  -5 -11 -14 3321.62 242.726   3
  -5 -11 -14 4002.60 246.258   4
  -5 -11 -15 580.482 108.964   3
  -5 -11 -15 601.316 94.4190   4
  -5 -11 -16 3039.59 259.598   3
  -5 -11 -16 3807.61 254.733   4
  -5 -11 -17 2411.81 209.429   4
   5 -12 -18 31.3254 41.6954   3
   5 -12 -17 5629.89 315.521   3
   5 -12 -16 495.331 91.4282   3
   5 -12 -16 738.280 85.6469   5
   5 -12 -15 8529.49 324.525   5
   5 -12 -15 7396.55 359.294   3
   5 -12 -14 2467.20 183.357   3
  -5 -12  13 14625.0 459.850   2
   5 -12 -13 13327.7 492.173   3
  -5 -12  12 3102.70 176.849   2
   5 -12 -12 2933.12 189.946   3
  -5 -12  11 10134.5 370.786   2
   5 -12 -11 9642.70 378.986   3
  -5 -12  10 1401.05 128.065   2
   5 -12 -10 1080.23 107.923   3
   5 -12  -9 3811.60 200.516   3
  -5 -12   9 3853.80 217.604   2
  -5  12   8 1052.14 107.260   1
   5 -12  -8 869.169 93.8760   3
  -5 -12   8 1173.23 118.322   2
  -5  12   7 52.5436 30.9220   1
   5 -12  -7 32.8290 36.4872   3
  -5 -12   7 134.630 33.5508   2
  -5  12   6 16.5359 26.7595   1
  -5 -12   6 44.3850 47.0774   2
   5 -12  -6 58.0184 36.7476   3
  -5  12   5 5776.87 268.177   1
  -5 -12   5 5809.76 276.155   2
  -5 -12   4 1226.48 118.322   2
  -5 -12   4 1290.18 82.9909   3
  -5  12   4 1290.93 119.427   1
  -5 -12   3 15536.2 509.666   2
  -5  12   3 15597.5 520.201   1
   5  12  -3 16109.8 436.312   1
  -5 -12   3 16811.9 451.806   3
  -5  12   2 1053.93 102.793   1
  -5 -12   2 1104.33 107.166   2
   5  12  -2 1029.45 77.1977   1
  -5 -12   2 1089.26 91.0276   3
   5  12  -1 13951.2 399.990   1
  -5  12   1 13582.2 476.543   1
  -5 -12   1 13456.8 464.891   2
  -5 -12   1 14179.5 415.060   3
  -5 -12   0 365.373 64.0849   2
  -5 -12   0 553.848 66.1246   3
  -5 -12  -1 5996.49 275.995   2
  -5 -12  -1 6064.07 243.791   3
  -5 -12  -2 39.7472 32.7531   3
  -5 -12  -2 61.1398 46.8243   2
  -5 -12  -3 1439.61 118.145   3
  -5 -12  -4 3227.61 187.039   3
  -5 -12  -5 61.0238 49.0749   3
  -5 -12  -6 7221.75 311.910   3
  -5 -12  -7 4152.84 231.085   3
  -5 -12  -8 5978.69 291.488   3
  -5 -12  -9 4951.94 268.174   3
  -5 -12 -10 3419.02 228.006   3
  -5 -12 -11 6542.54 329.163   3
  -5 -12 -12 6619.14 352.256   3
  -5 -12 -12 7767.22 363.942   4
  -5 -12 -13 2630.52 215.542   3
  -5 -12 -13 2991.79 217.929   4
  -5 -12 -14 1585.03 169.061   3
  -5 -12 -14 2011.93 170.162   4
  -5 -12 -15 195.492 72.2673   3
  -5 -12 -15 171.179 72.1091   4
  -5 -12 -16-80.0715 60.9696   4
   5 -13 -17 6671.11 357.365   3
   5 -13 -16 1890.66 173.788   3
   5 -13 -15 2595.81 197.902   3
   5 -13 -14 140.502 54.1029   3
   5 -13 -13-14.1804 32.9864   3
  -5 -13  12-34.8274 36.9903   2
   5 -13 -12 22.5735 37.9857   3
  -5 -13  11 2370.18 163.787   2
   5 -13 -11 2027.46 154.807   3
  -5  13  10 680.976 78.1148   1
   5 -13 -10 903.247 102.465   3
  -5 -13  10 940.540 106.791   2
  -5  13   9 9537.94 391.767   1
   5 -13  -9 10057.5 376.323   3
  -5 -13   9 10283.9 400.178   2
  -5 -13   8 232.388 69.3282   2
  -5  13   8 171.038 60.8383   1
   5 -13  -8 219.160 48.9302   3
  -5  13   7 12266.2 453.800   1
  -5 -13   7 12351.6 464.551   2
   5 -13  -7 12421.3 413.931   3
  -5 -13   6-6.19161 30.1709   2
   5 -13  -6 20.3655 34.4690   3
  -5  13   6-3.11263 23.7734   1
  -5  13   5 9306.17 376.864   1
   5 -13  -5 9347.98 330.034   3
  -5 -13   5 9544.76 383.740   2
  -5 -13   4 53.3736 19.4532   2
  -5  13   4 13.9676 28.3698   1
   5 -13  -4 76.7338 48.2482   3
  -5  13   3 2411.81 175.368   1
  -5 -13   3 2746.94 174.950   2
   5 -13  -3 2583.52 142.524   3
   5  13  -3 2527.52 129.926   1
   5  13  -2 144.956 40.7581   1
  -5 -13   2 129.653 30.2574   3
   5 -13  -2 55.3809 30.4646   3
  -5 -13   2 122.775 22.3936   2
  -5  13   2 80.2847 37.0092   1
  -5  13   1 781.105 95.6499   1
  -5 -13   1 663.546 92.2684   2
   5  13  -1 633.685 66.2193   1
  -5 -13   1 670.844 72.0232   3
   5  13   0 3250.86 165.039   1
  -5 -13   0 3196.13 197.431   2
  -5 -13   0 3247.44 166.318   3
  -5 -13  -1 3108.28 199.745   2
  -5 -13  -1 3307.29 173.241   3
  -5 -13  -2 4029.61 237.929   2
  -5 -13  -2 4436.00 212.492   3
  -5 -13  -3 12295.9 419.900   3
  -5 -13  -3 12251.4 460.975   2
  -5 -13  -4 2738.31 173.949   3
  -5 -13  -5 9160.32 363.010   3
  -5 -13  -6 2120.84 168.043   3
  -5 -13  -7 5834.43 289.001   3
  -5 -13  -8 1366.56 139.290   3
  -5 -13  -9 590.685 93.4937   3
  -5 -13 -10 260.455 56.5513   3
  -5 -13 -11 3137.69 227.285   3
  -5 -13 -11 3384.92 234.062   4
  -5 -13 -12 2908.33 222.968   3
  -5 -13 -12 3320.46 238.531   4
  -5 -13 -13 6200.55 354.167   3
  -5 -13 -13 7135.71 361.938   4
  -5 -13 -14 2941.82 243.981   3
  -5 -13 -14 3339.99 242.279   4
   5 -14 -16 5165.65 308.155   3
   5 -14 -15 89.2905 54.2815   3
   5 -14 -14 7642.41 364.242   3
   5 -14 -13 594.897 93.2830   3
   5 -14 -12 9674.60 402.025   3
  -5  14  11 559.395 86.0011   1
   5 -14 -11 582.300 85.5063   3
   5 -14 -10 3800.07 224.444   3
  -5 -14  10 4341.00 241.788   2
  -5  14  10 3427.24 227.598   1
   5 -14  -9 367.842 76.1466   3
  -5  14   9 206.240 49.5061   1
  -5 -14   9 283.762 70.8127   2
  -5  14   8 493.280 78.0146   1
   5 -14  -8 606.943 80.7757   3
  -5 -14   8 616.269 98.8249   2
   5 -14  -7 190.582 57.5413   3
  -5  14   7 223.076 57.8729   1
  -5 -14   7 302.158 68.2546   2
  -5  14   6 2751.79 192.687   1
   5 -14  -6 2998.01 172.427   3
  -5 -14   6 2805.06 208.487   2
  -5 -14   5 615.803 95.6910   2
  -5  14   5 713.312 103.270   1
   5 -14  -5 688.873 85.4382   3
   5 -14  -4 12696.7 397.040   3
  -5 -14   4 11023.5 439.900   2
  -5  14   4 11780.9 448.836   1
  -5  14   3 810.618 102.887   1
  -5 -14   3 748.898 99.7921   2
   5 -14  -3 840.065 84.8448   3
  -5  14   2 15608.2 541.992   1
   5 -14  -2 15797.9 455.459   3
  -5 -14   2 14583.5 519.553   2
   5  14  -2 15867.2 452.882   1
   5  14  -1 74.2972 36.4905   1
   5 -14  -1 81.3666 45.3413   3
  -5  14   1 36.3725 34.7860   1
  -5 -14   1 19.7932 53.3033   2
  -5 -14   0 13496.4 415.553   3
   5  14   0 12790.1 405.532   1
  -5 -14   0 11717.1 455.717   2
   5  14   1 710.331 91.7163   1
  -5 -14  -1 742.596 86.4937   3
  -5 -14  -1 643.481 96.4906   2
  -5 -14  -2 7586.99 350.092   2
  -5 -14  -2 8307.74 318.242   3
  -5 -14  -3 317.576 71.1282   3
  -5 -14  -3 380.210 80.0742   2
  -5 -14  -4 1423.84 135.752   3
  -5 -14  -4 1177.10 128.898   2
  -5 -14  -5 684.990 88.7628   3
  -5 -14  -6 344.077 80.5942   3
  -5 -14  -7 3757.68 232.861   3
  -5 -14  -8 3536.41 231.376   3
  -5 -14  -9 2130.72 182.081   3
  -5 -14 -10 4747.10 283.272   3
  -5 -14 -10 5572.41 306.444   4
  -5 -14 -11 2716.17 212.887   3
  -5 -14 -11 2799.82 225.200   4
  -5 -14 -12 3912.11 269.224   3
  -5 -14 -12 4577.53 288.036   4
  -5 -14 -13 1449.70 160.619   3
   5 -15 -14 1949.93 176.533   3
  -5  15  13 411.364 43.8297   1
   5 -15 -13 595.354 98.9113   3
  -5  15  12 110.075 61.3858   1
   5 -15 -12 77.3160 33.6340   3
   5 -15 -11 199.337 61.0882   3
  -5  15  11 354.603 85.1237   1
  -5  15  10 1435.44 147.209   1
   5 -15 -10 1222.08 121.212   3
   5 -15  -9 985.363 116.392   3
  -5 -15   9 1274.49 140.896   2
  -5  15   9 1115.00 126.502   1
  -5  15   8 6621.18 334.318   1
   5 -15  -8 6896.74 305.855   3
  -5 -15   8 7233.50 342.657   2
  -5  15   7 600.684 107.941   1
  -5 -15   7 512.764 83.3727   2
   5 -15  -7 651.077 93.9087   3
   5 -15  -6 6011.60 268.654   3
  -5  15   6 6203.80 313.222   1
  -5 -15   6 5906.47 309.437   2
   5 -15  -5 402.475 57.4481   3
  -5 -15   5 302.585 57.5678   2
  -5  15   5 380.559 67.7250   1
   5 -15  -4 2041.70 138.567   3
  -5  15   4 1770.48 164.090   1
  -5 -15   4 1777.65 156.113   2
  -5 -15   3 425.580 87.1346   2
  -5  15   3 441.457 75.5584   1
   5 -15  -3 380.512 64.2456   3
  -5 -15   2 1052.74 118.763   2
  -5  15   2 1142.07 128.181   1
  -5 -15   1 936.032 112.742   2
   5  15   0 2201.06 142.252   1
  -5 -15   0 2182.17 178.870   2
   5  15   1 4728.07 223.416   1
  -5 -15  -1 4143.21 255.834   2
   5  15   2 6651.08 280.427   1
  -5 -15  -2 6314.69 324.589   2
  -5 -15  -3 7128.43 305.113   3
  -5 -15  -3 6471.63 334.653   2
  -5 -15  -4 11757.5 487.800   2
  -5 -15  -4 12142.5 448.098   3
  -5 -15  -5 6896.41 357.921   2
  -5 -15  -5 6992.22 322.395   3
  -5 -15  -6 9000.61 391.080   3
  -5 -15  -7 813.770 113.533   3
  -5 -15  -8 2244.07 193.217   3
  -5 -15  -9 40.2746 62.4913   3
  -5 -15  -9 47.9599 41.9162   4
  -5 -15 -10 28.5873 40.8020   3
  -5 -15 -10 43.1145 42.6895   4
  -5 -15 -11 100.437 83.7230   3
  -5 -15 -12 3659.61 269.411   3
   5 -16 -13 5939.13 325.237   3
   5 -16 -12 117.254 24.2706   3
   5 -16 -11 4074.97 247.626   3
   5 -16 -10 190.867 56.2753   3
  -5  16  10 437.364 85.2719   1
  -5  16   9 1832.00 167.279   1
   5 -16  -9 1834.92 154.388   3
  -5  16   8 353.362 64.2604   1
   5 -16  -8 353.274 53.3989   3
  -5  16   7 251.319 69.4082   1
   5 -16  -7 280.220 50.8220   3
  -5 -16   7 319.852 78.0652   2
  -5 -16   6 57.5264 57.4715   2
   5 -16  -6 32.5385 41.7939   3
  -5  16   6-21.9026 31.9221   1
  -5  16   5 5687.41 310.128   1
  -5 -16   5 5874.52 315.296   2
  -5 -16   4 135.524 58.7917   2
  -5  16   4 192.398 59.8185   1
  -5 -16   3 14970.2 559.926   2
  -5  16   3 17145.8 599.726   1
  -5 -16   2 13.1820 64.1268   2
  -5  16   2 16.1817 43.6130   1
  -5 -16   1 15695.2 566.183   2
  -5 -16   0 48.6130 82.3104   2
  -5 -16  -1 9200.30 412.400   2
  -5 -16  -2 193.875 71.8705   2
   5  16   3 2298.80 167.359   1
  -5 -16  -3 2260.93 197.238   2
  -5 -16  -4 130.363 58.3520   2
  -5 -16  -5 178.262 69.7866   2
  -5 -16  -6 96.4590 60.1913   3
  -5 -16  -6 77.0256 72.1272   2
  -5 -16  -7 2729.02 214.611   3
  -5 -16  -7 2811.41 225.975   4
  -5 -16  -8 323.259 88.9486   3
  -5 -16  -9 6573.47 357.997   3
  -5 -16 -10 24.9728 47.5584   3
   5 -17 -11 77.0359 50.6335   3
   5 -17 -10 2773.12 206.645   3
  -5  17   7 3025.44 230.894   1
  -5 -17   6 3596.65 258.993   2
  -5  17   6 4087.50 264.608   1
  -5 -17   5 1425.57 160.245   2
  -5  17   5 1381.31 157.557   1
  -5 -17   4 322.646 71.1325   2
  -5  17   3-69.4928 69.8060   1
  -5 -17   3 32.9906 44.1310   2
  -5 -17   2 114.205 56.1755   2
  -5 -17   1 1008.83 127.661   2
  -5 -17   0 145.669 37.9767   2
  -5 -17  -1 2730.74 213.097   2
  -5 -17  -2 2985.32 230.634   2
  -5 -17  -3 7208.55 384.750   2
  -5 -17  -4 5082.17 322.848   2
  -5 -17  -5 5395.06 336.950   2
  -5 -18   4 5170.92 315.679   2
  -5 -18   3 29.9231 28.7675   2
  -5 -18   2 11057.7 481.534   2
  -5 -18   1 100.040 49.0639   2
  -5 -18   0 8111.39 403.450   2
  -5 -18   0 8583.83 405.652   4
  -5 -18  -1 33.7938 71.0408   2
  -5 -18  -2 3845.29 280.945   2
   6   0 -25-60.1214 52.4726   3
   6   0 -24 2021.83 162.944   3
   6   0 -23 38.5226 28.8015   3
   6   0 -22 8429.17 351.773   3
   6   0 -21 19.6098 26.9220   3
   6   0 -20 3356.22 194.633   3
   6   0 -19-28.0212 25.0198   3
   6   0 -18 3887.95 198.909   3
   6   0 -17 20.8419 34.7426   3
  -6   0  17 17.3199 38.0486   2
  -6   0  16 1898.10 131.968   2
  -6   0  15 9.30754 33.7059   2
  -6   0  14 1274.47 100.300   2
  -6   0  13 16.5160 20.0122   2
   6   0 -12 46793.4 1129.25   5
  -6   0  12 47861.1 1129.80   2
   6   0 -11 23.8054 32.1947   5
  -6   0  11 7.82365 24.0062   2
  -6   0  10 42663.1 1019.39   2
  -6   0   9 25.2223 22.1861   2
  -6   0   8 35737.2 862.138   2
  -6   0   7-5.66404 23.5002   2
  -6   0   6 15733.3 438.964   2
  -6   0   6 16419.9 390.913   1
  -6   0   5 29.7654 20.3771   2
   6   0  -5 27.8224 26.3766   3
  -6   0   5 24.2814 9.09707   1
  -6   0   4 6700.52 229.510   2
   6   0  -4 7162.63 223.290   3
   6   0  -4 7081.44 228.518   2
  -6   0   3-5.20696 17.4364   2
   6   0  -3 16.3035 12.2741   1
   6   0  -3 12.6095 22.4245   3
   6   0  -3 35.0015 30.2687   2
  -6   0   2 4702.01 174.511   2
   6   0  -2 4473.26 147.192   1
  -6   0   2 4899.23 183.376   3
[truncated: 397,268 more chars]
