# Supplementary material
Source: MDPI journal article supplement (https://www.mdpi.com/2304-6740/10/4/41)
Supplement: s1 [file s1 › 4HoFe.cif]

 
data_4HoFe
 
_audit_creation_method            'SHELXL-2016/6'
_shelx_SHELXL_version_number      '2016/6'
_chemical_name_systematic         ?
_chemical_name_common             ?
_chemical_melting_point           ?
_chemical_formula_moiety 
 'C17 H19 Fe Ho N13 O4, 3(H2 O)' 
_chemical_formula_sum
 'C17 H25 Fe Ho N13 O7' 
_chemical_formula_weight          744.28

loop_
 _atom_type_symbol
 _atom_type_description
 _atom_type_scat_dispersion_real
 _atom_type_scat_dispersion_imag
 _atom_type_scat_source
 'C'  'C'   0.0033   0.0016
 'International Tables Vol C Tables 4.2.6.8 and 6.1.1.4'
 'Fe'  'Fe'   0.3463   0.8444
 'International Tables Vol C Tables 4.2.6.8 and 6.1.1.4'
 'H'  'H'   0.0000   0.0000
 'International Tables Vol C Tables 4.2.6.8 and 6.1.1.4'
 'Ho'  'Ho'  -0.2175   4.6783
 'International Tables Vol C Tables 4.2.6.8 and 6.1.1.4'
 'N'  'N'   0.0061   0.0033
 'International Tables Vol C Tables 4.2.6.8 and 6.1.1.4'
 'O'  'O'   0.0106   0.0060
 'International Tables Vol C Tables 4.2.6.8 and 6.1.1.4'
 
_space_group_crystal_system       monoclinic
_space_group_IT_number            14
_space_group_name_H-M_alt         'P 21/c'
_space_group_name_Hall            '-P 2ybc'
 
_shelx_space_group_comment
;
The symmetry employed for this shelxl refinement is uniquely defined
by the following loop, which should always be used as a source of
symmetry information in preference to the above space-group names.
They are only intended as comments.
;
 
loop_
 _space_group_symop_operation_xyz
 'x, y, z'
 '-x, y+1/2, -z+1/2'
 '-x, -y, -z'
 'x, -y-1/2, z-1/2'
 
_cell_length_a                    12.721(2)
_cell_length_b                    12.6610(10)
_cell_length_c                    17.293(2)
_cell_angle_alpha                 90
_cell_angle_beta                  103.040(10)
_cell_angle_gamma                 90
_cell_volume                      2713.4(6)
_cell_formula_units_Z             4
_cell_measurement_temperature     295(1)
_cell_measurement_reflns_used     6330
_cell_measurement_theta_min       1.7300
_cell_measurement_theta_max       28.6720
 
_exptl_crystal_description        needle
_exptl_crystal_colour             orange
_exptl_crystal_density_meas       ?
_exptl_crystal_density_method     ?
_exptl_crystal_density_diffrn     1.822          
_exptl_crystal_F_000              1468
_exptl_transmission_factor_min    ?
_exptl_transmission_factor_max    ?
_exptl_crystal_size_max           0.248
_exptl_crystal_size_mid           0.024
_exptl_crystal_size_min           0.012
_exptl_absorpt_coefficient_mu     3.491
_shelx_estimated_absorpt_T_min    0.478
_shelx_estimated_absorpt_T_max    0.959
_exptl_absorpt_correction_T_min   0.51073
_exptl_absorpt_correction_T_max   1.00000
_exptl_absorpt_correction_type    'multi-scan'
_exptl_absorpt_process_details
;
CrysAlisPro, Agilent Technologies,
Version 1.171.37.34c (release 10-06-2014 CrysAlis171 .NET)
(compiled Jun 10 2014,17:39:53)
Empirical absorption correction using spherical harmonics,
 implemented in SCALE3 ABSPACK scaling algorithm.
;

_diffrn_ambient_temperature       295(1)
_diffrn_ambient_environment       'N~2~'
_diffrn_source                    'fine-focus sealed X-ray tube'
_diffrn_source_type               'Enhance (Mo) X-ray Source'
_diffrn_radiation_probe           x-ray
_diffrn_radiation_type            'Mo K\a'
_diffrn_radiation_wavelength      0.71073
_diffrn_radiation_monochromator   graphite
_diffrn_measurement_device        'four-circle diffractometer'
_diffrn_measurement_device_type   'Xcalibur, Ruby, Gemini'
_diffrn_detector                  'CCD plate'
_diffrn_detector_type             'Ruby'
_diffrn_detector_area_resol_mean  10.4752
_diffrn_reflns_number             16823
_diffrn_reflns_av_unetI/netI      0.1054
_diffrn_reflns_av_R_equivalents   0.0762
_diffrn_reflns_limit_h_min        -11
_diffrn_reflns_limit_h_max        17
_diffrn_reflns_limit_k_min        -14
_diffrn_reflns_limit_k_max        17
_diffrn_reflns_limit_l_min        -23
_diffrn_reflns_limit_l_max        19
_diffrn_reflns_theta_min          2.012
_diffrn_reflns_theta_max          29.522
_diffrn_reflns_theta_full         26.700
_diffrn_measured_fraction_theta_max   0.843
_diffrn_measured_fraction_theta_full  0.991
_diffrn_reflns_Laue_measured_fraction_max    0.843
_diffrn_reflns_Laue_measured_fraction_full   0.991
_diffrn_reflns_point_group_measured_fraction_max   0.843
_diffrn_reflns_point_group_measured_fraction_full  0.991
_reflns_number_total              6386
_reflns_number_gt                 4584
_reflns_threshold_expression      'I > 2\s(I)'
_reflns_Friedel_coverage          0.000
_reflns_Friedel_fraction_max      .
_reflns_Friedel_fraction_full     .
 
_reflns_special_details
;
 Reflections were merged by SHELXL according to the crystal
 class for the calculation of statistics and refinement.
 
 _reflns_Friedel_fraction is defined as the number of unique
 Friedel pairs measured divided by the number that would be
 possible theoretically, ignoring centric projections and
 systematic absences.
;
 
_computing_data_collection       'CrysAlisPro 1.171.37.34 (Rigaku OD, 2015)'
_computing_cell_refinement       'CrysAlisPro 1.171.37.34 (Rigaku OD, 2015)'
_computing_data_reduction        'CrysAlisPro 1.171.37.34 (Rigaku OD, 2015)'
_computing_structure_solution    'SHELXS-97 (Sheldrick, 2008)'
_computing_structure_refinement  'SHELXL-2016/6 (Sheldrick, 2016)'
_computing_molecular_graphics    'DIAMOND 3.1 (Crystal Impact GbR 2005)'
_computing_publication_material  'WinGX publication routines (Farrugia, 1999)'

_refine_special_details           ?
_refine_ls_structure_factor_coef  Fsqd
_refine_ls_matrix_type            full
_refine_ls_weighting_scheme       calc
_refine_ls_weighting_details
'w=1/[\s^2^(Fo^2^)+(0.0201P)^2^] where P=(Fo^2^+2Fc^2^)/3'
_atom_sites_solution_primary      direct
_atom_sites_solution_secondary    difmap
_atom_sites_solution_hydrogens    mixed
_refine_ls_hydrogen_treatment     mixed
_refine_ls_extinction_method      none
_refine_ls_extinction_coef        .
_refine_ls_number_reflns          6386
_refine_ls_number_parameters      399
_refine_ls_number_restraints      27
_refine_ls_R_factor_all           0.0862
_refine_ls_R_factor_gt            0.0519
_refine_ls_wR_factor_ref          0.0902
_refine_ls_wR_factor_gt           0.0814
_refine_ls_goodness_of_fit_ref    1.000
_refine_ls_restrained_S_all       0.998
_refine_ls_shift/su_max           0.006
_refine_ls_shift/su_mean          0.000
 
loop_
 _atom_site_label
 _atom_site_type_symbol
 _atom_site_fract_x
 _atom_site_fract_y
 _atom_site_fract_z
 _atom_site_U_iso_or_equiv
 _atom_site_adp_type
 _atom_site_occupancy
 _atom_site_site_symmetry_order  
 _atom_site_calc_flag
 _atom_site_refinement_flags_posn
 _atom_site_refinement_flags_adp
 _atom_site_refinement_flags_occupancy
 _atom_site_disorder_assembly
 _atom_site_disorder_group
Ho1 Ho 0.68316(2) 0.61142(2) 0.20628(2) 0.01682(9) Uani 1 1 d . . . . .
N5 N 0.8595(4) 0.5175(3) 0.2637(3) 0.0219(11) Uani 1 1 d . . . . .
N6 N 0.6303(4) 0.7629(3) 0.2871(3) 0.0215(11) Uani 1 1 d . . . . .
N7 N 0.7480(4) 0.6077(3) 0.3536(3) 0.0195(10) Uani 1 1 d . . . . .
O1 O 0.7833(3) 0.5627(3) 0.1153(2) 0.0295(10) Uani 1 1 d . . . . .
O2 O 0.5982(3) 0.7576(3) 0.1329(2) 0.0255(9) Uani 1 1 d . . . . .
O3 O 0.8260(3) 0.7359(3) 0.2228(3) 0.0370(11) Uani 1 1 d D . . . .
H3WA H 0.815(5) 0.8004(18) 0.221(4) 0.055 Uiso 1 1 d D U . . .
H3WB H 0.887(3) 0.720(4) 0.248(3) 0.055 Uiso 1 1 d D U . . .
O4 O 0.5697(3) 0.5455(3) 0.0888(2) 0.0308(10) Uani 1 1 d D . . . .
H4WA H 0.513470 0.572691 0.068511 0.046 Uiso 1 1 d D U . . .
H4WB H 0.594(4) 0.503(4) 0.062(3) 0.046 Uiso 1 1 d D U . . .
Fe1 Fe 0.71941(6) 0.17554(6) 0.23637(5) 0.01889(19) Uani 1 1 d . . . . .
C12 C 0.6788(4) 0.3258(4) 0.2330(3) 0.0213(13) Uani 1 1 d . . . . .
C13 C 0.4164(5) 0.6250(4) 0.2435(3) 0.0230(13) Uani 1 1 d . . . . .
C14 C 0.7720(5) 0.0333(5) 0.2393(4) 0.0303(15) Uani 1 1 d . . . . .
C15 C 0.8590(5) 0.2138(4) 0.2158(3) 0.0254(14) Uani 1 1 d . . . . .
C16 C 0.6519(5) 0.1645(4) 0.1230(4) 0.0306(15) Uani 1 1 d . . . . .
C17 C 0.7780(5) 0.1864(5) 0.3509(4) 0.0311(15) Uani 1 1 d . . . . .
N12 N 0.6605(4) 0.4149(3) 0.2297(3) 0.0257(12) Uani 1 1 d . . . . .
N13 N 0.4974(4) 0.5935(3) 0.2336(3) 0.0263(12) Uani 1 1 d . . . . .
N14 N 0.8111(5) -0.0503(4) 0.2434(4) 0.0503(17) Uani 1 1 d . . . . .
N15 N 0.9442(5) 0.2306(4) 0.2065(4) 0.0453(15) Uani 1 1 d . . . . .
N16 N 0.6091(5) 0.1576(4) 0.0572(3) 0.0486(16) Uani 1 1 d . . . . .
N17 N 0.8122(5) 0.1881(5) 0.4187(4) 0.0590(18) Uani 1 1 d . . . . .
C1 C 0.8739(6) 0.5213(5) 0.1325(4) 0.0355(17) Uani 1 1 d . . . . .
C2 C 0.5550(5) 0.8325(4) 0.1615(3) 0.0248(13) Uani 1 1 d . . . . .
C3 C 0.9789(6) 0.4140(5) 0.3690(4) 0.0414(18) Uani 1 1 d . . . . .
H3A H 0.963255 0.344008 0.348308 0.062 Uiso 1 1 calc R U . . .
H3B H 0.990378 0.412473 0.425800 0.062 Uiso 1 1 calc R U . . .
H3C H 1.042599 0.439954 0.354388 0.062 Uiso 1 1 calc R U . . .
C4 C 0.8857(5) 0.4854(4) 0.3355(4) 0.0254(14) Uani 1 1 d . . . . .
C5 C 0.8160(5) 0.5276(4) 0.3870(3) 0.0237(13) Uani 1 1 d . . . . .
C6 C 0.8220(5) 0.4942(5) 0.4644(4) 0.0341(16) Uani 1 1 d . . . . .
H6 H 0.865133 0.437155 0.485621 0.041 Uiso 1 1 calc R U . . .
C7 C 0.7615(5) 0.5487(5) 0.5094(4) 0.0394(17) Uani 1 1 d . . . . .
H7 H 0.759764 0.525128 0.560017 0.047 Uiso 1 1 calc R U . . .
C8 C 0.7044(5) 0.6375(5) 0.4790(3) 0.0330(16) Uani 1 1 d . . . . .
H8 H 0.670499 0.678809 0.510658 0.040 Uiso 1 1 calc R U . . .
C9 C 0.6984(5) 0.6641(4) 0.4007(3) 0.0257(13) Uani 1 1 d . . . . .
C10 C 0.6402(4) 0.7595(4) 0.3621(3) 0.0210(13) Uani 1 1 d . . . . .
C11 C 0.5995(6) 0.8419(5) 0.4105(4) 0.0413(18) Uani 1 1 d . . . . .
H11A H 0.596353 0.908943 0.384182 0.062 Uiso 1 1 calc R U . . .
H11B H 0.647351 0.846592 0.461917 0.062 Uiso 1 1 calc R U . . .
H11C H 0.528620 0.822729 0.416271 0.062 Uiso 1 1 calc R U . . .
N1 N 0.9323(6) 0.5054(6) 0.0790(4) 0.066(2) Uani 1 1 d D . . . .
H1A H 0.902(6) 0.514(6) 0.029(2) 0.079 Uiso 1 1 d D U . . .
H1B H 0.992(4) 0.470(6) 0.094(4) 0.079 Uiso 1 1 d D U . . .
N2 N 0.4935(5) 0.9044(4) 0.1176(3) 0.0452(17) Uani 1 1 d D . . . .
H2A H 0.475(6) 0.904(5) 0.066(2) 0.054 Uiso 1 1 d D U . . .
H2B H 0.469(5) 0.952(4) 0.145(3) 0.054 Uiso 1 1 d D U . . .
N3 N 0.9201(4) 0.4915(4) 0.2107(3) 0.0299(13) Uani 1 1 d D . . . .
H3 H 0.977(4) 0.451(4) 0.219(3) 0.036 Uiso 1 1 d D U . . .
N4 N 0.5739(4) 0.8435(4) 0.2427(3) 0.0245(11) Uani 1 1 d D . . . .
H4 H 0.524(4) 0.882(4) 0.254(3) 0.029 Uiso 1 1 d D U . . .
O5 O 0.3707(4) 0.6209(3) 0.0054(3) 0.0449(12) Uani 1 1 d D . . . .
H5WA H 0.387(5) 0.682(2) -0.002(4) 0.067 Uiso 1 1 d D U . . .
H5WB H 0.320(5) 0.615(5) 0.028(4) 0.067 Uiso 1 1 d D U . . .
O6 O 1.1344(6) 0.3890(5) 0.0783(4) 0.0817(19) Uani 1 1 d D . . . .
H6WA H 1.098(8) 0.336(5) 0.064(5) 0.123 Uiso 1 1 d D U . . .
H6WB H 1.157(8) 0.397(7) 0.1260(17) 0.123 Uiso 1 1 d D U . . .
O7 O 0.9855(5) 0.2755(5) 0.5477(3) 0.0741(18) Uani 1 1 d D . . . .
H7WA H 0.943(5) 0.251(8) 0.509(3) 0.111 Uiso 1 1 d D U . . .
H7WB H 0.960(6) 0.282(8) 0.587(3) 0.111 Uiso 1 1 d D U . . .
 
loop_
 _atom_site_aniso_label
 _atom_site_aniso_U_11
 _atom_site_aniso_U_22
 _atom_site_aniso_U_33
 _atom_site_aniso_U_23
 _atom_site_aniso_U_13
 _atom_site_aniso_U_12
Ho1 0.01626(16) 0.01505(13) 0.01988(15) -0.00100(11) 0.00558(11) 0.00042(10)
N5 0.020(3) 0.024(2) 0.023(3) -0.003(2) 0.008(2) -0.005(2)
N6 0.019(3) 0.020(2) 0.026(3) -0.002(2) 0.005(2) 0.000(2)
N7 0.016(3) 0.016(2) 0.026(3) -0.001(2) 0.007(2) 0.0023(19)
O1 0.020(3) 0.041(2) 0.028(2) -0.0025(19) 0.007(2) 0.006(2)
O2 0.033(3) 0.020(2) 0.026(2) -0.0001(17) 0.012(2) 0.0052(18)
O3 0.015(3) 0.018(2) 0.075(4) 0.001(2) 0.005(3) 0.0005(18)
O4 0.033(3) 0.029(2) 0.029(2) -0.0101(19) 0.004(2) 0.0037(19)
Fe1 0.0167(5) 0.0153(4) 0.0257(4) 0.0012(3) 0.0070(4) 0.0010(3)
C12 0.016(3) 0.023(3) 0.027(3) 0.004(3) 0.008(3) 0.000(2)
C13 0.027(4) 0.017(3) 0.027(3) -0.005(2) 0.010(3) -0.006(2)
C14 0.033(4) 0.024(3) 0.037(4) -0.001(3) 0.014(3) -0.008(3)
C15 0.023(4) 0.025(3) 0.027(3) 0.001(3) 0.004(3) 0.000(3)
C16 0.047(5) 0.023(3) 0.024(3) 0.001(3) 0.011(3) 0.005(3)
C17 0.015(4) 0.044(4) 0.034(4) 0.003(3) 0.006(3) 0.002(3)
N12 0.018(3) 0.018(2) 0.041(3) 0.001(2) 0.007(3) 0.001(2)
N13 0.025(3) 0.027(3) 0.028(3) -0.006(2) 0.009(3) -0.002(2)
N14 0.048(4) 0.023(3) 0.085(5) 0.004(3) 0.026(4) 0.002(3)
N15 0.025(4) 0.053(4) 0.060(4) 0.000(3) 0.016(3) 0.000(3)
N16 0.063(5) 0.049(4) 0.029(3) -0.004(3) 0.000(3) 0.007(3)
N17 0.059(5) 0.079(5) 0.037(4) 0.001(3) 0.008(4) -0.001(4)
C1 0.039(5) 0.036(4) 0.038(4) -0.002(3) 0.021(4) 0.001(3)
C2 0.022(4) 0.021(3) 0.029(3) -0.001(3) 0.002(3) -0.002(3)
C3 0.041(5) 0.050(4) 0.032(4) -0.003(3) 0.004(3) 0.017(3)
C4 0.021(4) 0.020(3) 0.032(4) -0.004(3) 0.000(3) -0.001(2)
C5 0.022(4) 0.024(3) 0.022(3) -0.003(2) -0.002(3) 0.000(3)
C6 0.034(4) 0.035(4) 0.031(4) 0.010(3) 0.003(3) 0.001(3)
C7 0.046(5) 0.057(5) 0.016(3) 0.005(3) 0.008(3) -0.011(4)
C8 0.040(5) 0.039(4) 0.022(3) -0.006(3) 0.011(3) 0.001(3)
C9 0.019(4) 0.032(3) 0.024(3) -0.001(3) 0.000(3) 0.002(3)
C10 0.017(3) 0.022(3) 0.025(3) -0.014(2) 0.007(3) -0.002(2)
C11 0.043(5) 0.045(4) 0.033(4) -0.015(3) 0.005(4) 0.011(3)
N1 0.049(5) 0.107(6) 0.049(4) 0.013(4) 0.029(4) 0.042(4)
N2 0.058(5) 0.040(3) 0.034(3) 0.008(3) 0.003(3) 0.028(3)
N3 0.023(3) 0.036(3) 0.033(3) -0.002(2) 0.010(3) 0.011(2)
N4 0.020(3) 0.023(3) 0.030(3) -0.002(2) 0.004(2) 0.010(2)
O5 0.037(3) 0.048(3) 0.049(3) -0.002(3) 0.008(3) 0.009(2)
O6 0.067(5) 0.102(5) 0.071(5) 0.001(4) 0.005(4) 0.009(4)
O7 0.100(6) 0.074(4) 0.048(4) 0.003(3) 0.015(4) -0.008(4)
 
_geom_special_details
;
 All esds (except the esd in the dihedral angle between two l.s. planes)
 are estimated using the full covariance matrix.  The cell esds are taken
 into account individually in the estimation of esds in distances, angles
 and torsion angles; correlations between esds in cell parameters are only
 used when they are defined by crystal symmetry.  An approximate (isotropic)
 treatment of cell esds is used for estimating esds involving l.s. planes.
;
 
loop_
 _geom_bond_atom_site_label_1
 _geom_bond_atom_site_label_2
 _geom_bond_distance
 _geom_bond_site_symmetry_2
 _geom_bond_publ_flag
Ho1 O1 2.320(4) . ?
Ho1 O4 2.363(4) . ?
Ho1 O2 2.364(4) . ?
Ho1 O3 2.374(4) . ?
Ho1 N7 2.496(5) . ?
Ho1 N13 2.522(5) . ?
Ho1 N5 2.534(5) . ?
Ho1 N12 2.547(4) . ?
Ho1 N6 2.551(4) . ?
N5 C4 1.277(7) . ?
N5 N3 1.364(6) . ?
N6 C10 1.276(7) . ?
N6 N4 1.377(6) . ?
N7 C9 1.343(6) . ?
N7 C5 1.372(7) . ?
O1 C1 1.240(7) . ?
O2 C2 1.251(6) . ?
O3 H3WA 0.829(19) . ?
O3 H3WB 0.825(19) . ?
O4 H4WA 0.8002 . ?
O4 H4WB 0.818(18) . ?
Fe1 C14 1.918(6) . ?
Fe1 C13 1.946(6) 2_645 ?
Fe1 C15 1.949(6) . ?
Fe1 C17 1.957(7) . ?
Fe1 C16 1.959(6) . ?
Fe1 C12 1.968(5) . ?
C12 N12 1.152(6) . ?
C13 N13 1.153(7) . ?
C14 N14 1.165(7) . ?
C15 N15 1.151(7) . ?
C16 N16 1.149(8) . ?
C17 N17 1.155(8) . ?
C1 N1 1.326(7) . ?
C1 N3 1.399(8) . ?
C2 N2 1.323(8) . ?
C2 N4 1.378(7) . ?
C3 C4 1.499(8) . ?
C3 H3A 0.9600 . ?
C3 H3B 0.9600 . ?
C3 H3C 0.9600 . ?
C4 C5 1.490(7) . ?
C5 C6 1.391(8) . ?
C6 C7 1.395(8) . ?
C6 H6 0.9300 . ?
C7 C8 1.377(9) . ?
C7 H7 0.9300 . ?
C8 C9 1.382(7) . ?
C8 H8 0.9300 . ?
C9 C10 1.493(8) . ?
C10 C11 1.500(7) . ?
C11 H11A 0.9600 . ?
C11 H11B 0.9600 . ?
C11 H11C 0.9600 . ?
N1 H1A 0.87(3) . ?
N1 H1B 0.87(3) . ?
N2 H2A 0.86(3) . ?
N2 H2B 0.86(3) . ?
N3 H3 0.88(4) . ?
N4 H4 0.85(4) . ?
O5 H5WA 0.823(19) . ?
O5 H5WB 0.821(19) . ?
O6 H6WA 0.82(2) . ?
O6 H6WB 0.82(2) . ?
O7 H7WA 0.82(2) . ?
O7 H7WB 0.83(2) . ?
 
loop_
 _geom_angle_atom_site_label_1
 _geom_angle_atom_site_label_2
 _geom_angle_atom_site_label_3
 _geom_angle
 _geom_angle_site_symmetry_1
 _geom_angle_site_symmetry_3
 _geom_angle_publ_flag
O1 Ho1 O4 69.22(14) . . ?
O1 Ho1 O2 95.69(13) . . ?
O4 Ho1 O2 72.46(13) . . ?
O1 Ho1 O3 74.68(15) . . ?
O4 Ho1 O3 129.83(16) . . ?
O2 Ho1 O3 77.86(14) . . ?
O1 Ho1 N7 125.57(14) . . ?
O4 Ho1 N7 150.26(14) . . ?
O2 Ho1 N7 124.66(13) . . ?
O3 Ho1 N7 79.74(16) . . ?
O1 Ho1 N13 141.63(15) . . ?
O4 Ho1 N13 73.34(14) . . ?
O2 Ho1 N13 80.60(14) . . ?
O3 Ho1 N13 139.58(14) . . ?
N7 Ho1 N13 85.11(15) . . ?
O1 Ho1 N5 64.41(14) . . ?
O4 Ho1 N5 119.07(13) . . ?
O2 Ho1 N5 146.59(13) . . ?
O3 Ho1 N5 71.24(14) . . ?
N7 Ho1 N5 62.08(14) . . ?
N13 Ho1 N5 131.91(14) . . ?
O1 Ho1 N12 86.98(14) . . ?
O4 Ho1 N12 73.90(15) . . ?
O2 Ho1 N12 142.73(15) . . ?
O3 Ho1 N12 137.77(15) . . ?
N7 Ho1 N12 80.92(15) . . ?
N13 Ho1 N12 74.80(14) . . ?
N5 Ho1 N12 66.53(15) . . ?
O1 Ho1 N6 145.53(14) . . ?
O4 Ho1 N6 123.44(14) . . ?
O2 Ho1 N6 63.88(14) . . ?
O3 Ho1 N6 73.99(14) . . ?
N7 Ho1 N6 61.47(14) . . ?
N13 Ho1 N6 65.86(14) . . ?
N5 Ho1 N6 117.23(15) . . ?
N12 Ho1 N6 126.43(14) . . ?
C4 N5 N3 120.8(5) . . ?
C4 N5 Ho1 122.9(4) . . ?
N3 N5 Ho1 115.8(3) . . ?
C10 N6 N4 120.7(4) . . ?
C10 N6 Ho1 123.6(4) . . ?
N4 N6 Ho1 114.9(3) . . ?
C9 N7 C5 118.5(5) . . ?
C9 N7 Ho1 121.0(4) . . ?
C5 N7 Ho1 118.3(3) . . ?
C1 O1 Ho1 124.9(4) . . ?
C2 O2 Ho1 124.7(3) . . ?
Ho1 O3 H3WA 122(4) . . ?
Ho1 O3 H3WB 120(4) . . ?
H3WA O3 H3WB 113(4) . . ?
Ho1 O4 H4WA 122.5 . . ?
Ho1 O4 H4WB 119(4) . . ?
H4WA O4 H4WB 117.0 . . ?
C14 Fe1 C13 90.3(2) . 2_645 ?
C14 Fe1 C15 84.9(2) . . ?
C13 Fe1 C15 175.2(2) 2_645 . ?
C14 Fe1 C17 89.3(3) . . ?
C13 Fe1 C17 89.6(2) 2_645 . ?
C15 Fe1 C17 90.7(2) . . ?
C14 Fe1 C16 91.8(3) . . ?
C13 Fe1 C16 87.1(3) 2_645 . ?
C15 Fe1 C16 92.7(3) . . ?
C17 Fe1 C16 176.5(3) . . ?
C14 Fe1 C12 174.8(2) . . ?
C13 Fe1 C12 94.9(2) 2_645 . ?
C15 Fe1 C12 89.9(2) . . ?
C17 Fe1 C12 90.0(2) . . ?
C16 Fe1 C12 89.2(2) . . ?
N12 C12 Fe1 176.1(5) . . ?
N13 C13 Fe1 178.0(5) . 2_655 ?
N14 C14 Fe1 175.2(6) . . ?
N15 C15 Fe1 175.5(6) . . ?
N16 C16 Fe1 177.7(6) . . ?
N17 C17 Fe1 177.1(6) . . ?
C12 N12 Ho1 159.4(4) . . ?
C13 N13 Ho1 154.6(4) . . ?
O1 C1 N1 122.2(6) . . ?
O1 C1 N3 120.7(5) . . ?
N1 C1 N3 117.0(6) . . ?
O2 C2 N2 123.4(6) . . ?
O2 C2 N4 119.2(5) . . ?
N2 C2 N4 117.4(5) . . ?
C4 C3 H3A 109.5 . . ?
C4 C3 H3B 109.5 . . ?
H3A C3 H3B 109.5 . . ?
C4 C3 H3C 109.5 . . ?
H3A C3 H3C 109.5 . . ?
H3B C3 H3C 109.5 . . ?
N5 C4 C5 114.0(5) . . ?
N5 C4 C3 125.3(5) . . ?
C5 C4 C3 120.7(5) . . ?
N7 C5 C6 121.5(5) . . ?
N7 C5 C4 114.7(5) . . ?
C6 C5 C4 123.7(5) . . ?
C5 C6 C7 118.0(6) . . ?
C5 C6 H6 121.0 . . ?
C7 C6 H6 121.0 . . ?
C8 C7 C6 120.1(5) . . ?
C8 C7 H7 119.9 . . ?
C6 C7 H7 119.9 . . ?
C7 C8 C9 118.8(5) . . ?
C7 C8 H8 120.6 . . ?
C9 C8 H8 120.6 . . ?
N7 C9 C8 122.3(5) . . ?
N7 C9 C10 114.4(5) . . ?
C8 C9 C10 123.2(5) . . ?
N6 C10 C9 114.0(5) . . ?
N6 C10 C11 125.2(5) . . ?
C9 C10 C11 120.8(5) . . ?
C10 C11 H11A 109.5 . . ?
C10 C11 H11B 109.5 . . ?
H11A C11 H11B 109.5 . . ?
C10 C11 H11C 109.5 . . ?
H11A C11 H11C 109.5 . . ?
H11B C11 H11C 109.5 . . ?
C1 N1 H1A 119(5) . . ?
C1 N1 H1B 117(5) . . ?
H1A N1 H1B 122(7) . . ?
C2 N2 H2A 125(5) . . ?
C2 N2 H2B 114(5) . . ?
H2A N2 H2B 121(6) . . ?
N5 N3 C1 114.0(5) . . ?
N5 N3 H3 127(4) . . ?
C1 N3 H3 118(4) . . ?
C2 N4 N6 116.2(4) . . ?
C2 N4 H4 108(4) . . ?
N6 N4 H4 128(4) . . ?
H5WA O5 H5WB 115(4) . . ?
H6WA O6 H6WB 117(5) . . ?
H7WA O7 H7WB 114(5) . . ?
 
loop_
 _geom_hbond_atom_site_label_D 
 _geom_hbond_atom_site_label_H 
 _geom_hbond_atom_site_label_A 
 _geom_hbond_distance_DH 
 _geom_hbond_distance_HA 
 _geom_hbond_distance_DA 
 _geom_hbond_angle_DHA 
 _geom_hbond_site_symmetry_A 
O3 H3WA N14  0.829(19) 1.93(3) 2.742(6) 166(6) 1_565
O3 H3WB N15  0.825(19) 2.12(3) 2.904(7) 159(6) 2_755
O4 H4WA O5  0.80 1.99 2.784(6) 170.6 .
O4 H4WB O5  0.818(18) 2.06(2) 2.868(5) 169(6) 3_665
N1 H1A O6  0.87(3) 2.19(5) 2.977(9) 151(7) 3_765
N1 H1B O6  0.87(3) 2.15(4) 2.966(10) 155(7) .
N2 H2A N16  0.86(3) 2.30(4) 3.110(8) 157(6) 3_665
N3 H3 N14  0.88(4) 2.62(5) 3.373(8) 144(5) 2_755
N4 H4 N12  0.85(4) 2.46(4) 3.252(6) 154(5) 2_655
N4 H4 N13  0.85(4) 2.71(5) 3.343(6) 132(4) 2_655
O5 H5WA N16  0.823(19) 2.24(3) 3.038(7) 163(8) 3_665
O5 H5WB N17  0.821(19) 2.30(4) 3.040(7) 150(5) 2_655
O6 H6WA O7  0.82(2) 1.99(4) 2.785(10) 165(10) 4_565
O6 H6WB N14  0.82(2) 2.30(3) 3.102(9) 167(11) 2_755
O7 H7WA N17  0.82(2) 2.16(3) 2.973(9) 171(8) .
O7 H7WB N15  0.83(2) 2.12(3) 2.911(8) 160(9) 4_566
C3 H3B O7  0.96 2.74 3.537(9) 140.8 .
C6 H6 O7  0.93 2.64 3.565(9) 179.0 .
C8 H8 O2  0.93 2.62 3.506(7) 160.5 4_576
 
_refine_diff_density_max    1.293
_refine_diff_density_min   -1.100
_refine_diff_density_rms    0.195

_shelx_res_file
;
TITL c99_4_cr1_RT
    shelx.res
    created by SHELXL-2016/6 at 17:30:56 on 25-Feb-2022
CELL  0.71073  12.7210  12.6610  17.2930   90.000  103.040   90.000
ZERR     4.00   0.0020   0.0010   0.0020    0.000    0.010    0.000
LATT   1
SYMM  - X, 1/2 + Y, 1/2 - Z
SFAC  C    FE   H    HO   N    O
UNIT  68   4    100  4    52   28
MERG   2
OMIT     0.00 180.00
rem OMIT    -1  16   9
rem OMIT     9   7   0
rem OMIT     0   2   0
rem OMIT   -12   9   3
rem OMIT   -11   8   2
rem OMIT    -1   1   2
rem OMIT     1   0   0
rem OMIT    -8  15   8
rem OMIT     0   1   1

OMIT    -1  16   9
OMIT     9   7   0
OMIT     0   2   0
OMIT   -11   8   2
OMIT   -12   9   3

OMIT    -8  15   8
OMIT     0  16   9
OMIT    -3  16   9
OMIT     8   8  14
OMIT   -10   0   2
OMIT     6   5  19
OMIT   -16   2   9
OMIT     1   0   0
OMIT   -15   3   3
OMIT     3  15   9
OMIT     9   9   1
OMIT     8   1  16
OMIT     5  15   5
OMIT    -1   7   1
OMIT   -15   3  10
OMIT     1   5   0
OMIT     8   8   7

OMIT    -2   2   5
OMIT     3   0   0
OMIT    12   3   9
OMIT     3   3   0
OMIT    -1  17   2
OMIT     3  15   8
OMIT     6  14   9

eqiv $1   -x+1, y+1/2, -z+1/2
eqiv $2   -x+1, y-1/2, -z+1/2
eqiv $3   x, y+1, z
eqiv $4   -x+2, y+1/2, -z+1/2
eqiv $5   -x+1, -y+1, -z
eqiv $6   x, -y+1/2, z-1/2
eqiv $7   x, -y+1/2, z+1/2
eqiv $8   x, -y+3/2, z+1/2
eqiv $9   2-x, 1-y, -z
htab
htab O3 n14_$3
htab O3 n15_$4
htab O4 O5
htab O4 O5_$5
htab N1 O6_$9
htab N1 O6
htab N2 N16_$5
htab N3 N14_$4
htab N4 N12_$1
htab N4 N13_$1
htab O5 N16_$5
htab O5 N17_$1
htab O6 O7_$6
htab O6 N14_$4
htab O7 N17
htab O7 N15_$7
htab C3 O7
htab c6 O7
htab C8 O2_$8
rtab M...M ho1 fe1
rtab M...M ho1 fe1_$1
rtab ang Fe1 Ho1 Fe1_$1
rtab ang Ho1 Fe1 Ho1_$2
FMAP   2
PLAN   100
ACTA    53.40
BOND   $H
size 0.012 0.024 0.248
L.S.  10
dfix 0.82 0.02 o3 h3wa o3 h3wb o4 h4wa o4 h4wb o5 h5wa o5 h5wb o6 h6wa =
     O6 H6WB O7 H7WA O7 H7WB
sadi h3wa h3wb h4wa h4wb h5wa h5wb h6wa h6wb H7WA H7WB
sadi n1 h1a n1 h1b n2 h2a n2 h2b
sadi n3 h3 n4 h4
WGHT    0.020100
FVAR       0.17488
MOLE    1
HO1   4    0.683160    0.611417    0.206281    11.00000    0.01626    0.01505 =
         0.01988   -0.00100    0.00558    0.00042
N5    5    0.859475    0.517537    0.263658    11.00000    0.01985    0.02369 =
         0.02343   -0.00348    0.00758   -0.00503
N6    5    0.630278    0.762883    0.287065    11.00000    0.01878    0.01986 =
         0.02609   -0.00163    0.00526    0.00018
N7    5    0.748047    0.607659    0.353646    11.00000    0.01643    0.01645 =
         0.02642   -0.00107    0.00683    0.00231
O1    6    0.783287    0.562669    0.115276    11.00000    0.01985    0.04082 =
         0.02838   -0.00248    0.00658    0.00609
O2    6    0.598160    0.757646    0.132936    11.00000    0.03303    0.02038 =
         0.02584   -0.00010    0.01235    0.00522
O3    6    0.826016    0.735901    0.222813    11.00000    0.01516    0.01809 =
         0.07509    0.00116    0.00479    0.00048
H3WA  3    0.814731    0.800438    0.221295    11.00000   -1.50000
H3WB  3    0.887068    0.720094    0.247951    11.00000   -1.50000
O4    6    0.569714    0.545501    0.088802    11.00000    0.03277    0.02893 =
         0.02900   -0.01012    0.00365    0.00369
AFIX   1
H4WA  3    0.513470    0.572691    0.068511    11.00000   -1.50000
AFIX   0
H4WB  3    0.594463    0.503077    0.061997    11.00000   -1.50000
MOLE    2
FE1   2    0.719410    0.175544    0.236372    11.00000    0.01672    0.01527 =
         0.02574    0.00122    0.00703    0.00103
C12   1    0.678778    0.325752    0.232977    11.00000    0.01557    0.02320 =
         0.02670    0.00430    0.00806   -0.00043
C13   1    0.416425    0.624970    0.243504    11.00000    0.02694    0.01733 =
         0.02656   -0.00535    0.00960   -0.00561
C14   1    0.772000    0.033322    0.239262    11.00000    0.03343    0.02353 =
         0.03691   -0.00085    0.01391   -0.00823
C15   1    0.859001    0.213816    0.215808    11.00000    0.02306    0.02545 =
         0.02679    0.00097    0.00396   -0.00033
C16   1    0.651929    0.164541    0.123027    11.00000    0.04660    0.02268 =
         0.02388    0.00112    0.01068    0.00527
C17   1    0.777987    0.186372    0.350899    11.00000    0.01531    0.04388 =
         0.03442    0.00347    0.00630    0.00212
N12   5    0.660471    0.414927    0.229708    11.00000    0.01775    0.01806 =
         0.04125    0.00054    0.00672    0.00059
N13   5    0.497444    0.593486    0.233634    11.00000    0.02509    0.02743 =
         0.02803   -0.00636    0.00922   -0.00166
N14   5    0.811150   -0.050282    0.243359    11.00000    0.04770    0.02318 =
         0.08520    0.00387    0.02557    0.00211
N15   5    0.944157    0.230607    0.206461    11.00000    0.02532    0.05315 =
         0.06023    0.00008    0.01579    0.00020
N16   5    0.609134    0.157554    0.057179    11.00000    0.06273    0.04940 =
         0.02861   -0.00359   -0.00045    0.00713
N17   5    0.812196    0.188149    0.418705    11.00000    0.05919    0.07942 =
         0.03696    0.00066    0.00761   -0.00086
MOLE    3
C1    1    0.873914    0.521274    0.132514    11.00000    0.03875    0.03599 =
         0.03782   -0.00167    0.02124    0.00050
C2    1    0.555007    0.832473    0.161464    11.00000    0.02202    0.02082 =
         0.02948   -0.00055    0.00159   -0.00240
C3    1    0.978853    0.414040    0.369003    11.00000    0.04095    0.04953 =
         0.03157   -0.00258    0.00392    0.01677
AFIX 137
H3A   3    0.963255    0.344008    0.348308    11.00000   -1.50000
H3B   3    0.990378    0.412473    0.425800    11.00000   -1.50000
H3C   3    1.042599    0.439954    0.354388    11.00000   -1.50000
AFIX   0
C4    1    0.885678    0.485371    0.335454    11.00000    0.02092    0.02004 =
         0.03246   -0.00397   -0.00003   -0.00139
C5    1    0.815984    0.527600    0.386954    11.00000    0.02171    0.02387 =
         0.02201   -0.00269   -0.00229    0.00031
C6    1    0.822049    0.494161    0.464440    11.00000    0.03379    0.03528 =
         0.03135    0.01043    0.00318    0.00145
AFIX  43
H6    3    0.865133    0.437155    0.485621    11.00000   -1.20000
AFIX   0
C7    1    0.761530    0.548750    0.509403    11.00000    0.04594    0.05679 =
         0.01619    0.00463    0.00830   -0.01090
AFIX  43
H7    3    0.759764    0.525128    0.560017    11.00000   -1.20000
AFIX   0
C8    1    0.704400    0.637524    0.479025    11.00000    0.03973    0.03898 =
         0.02238   -0.00601    0.01111    0.00055
AFIX  43
H8    3    0.670499    0.678809    0.510658    11.00000   -1.20000
AFIX   0
C9    1    0.698372    0.664137    0.400663    11.00000    0.01879    0.03189 =
         0.02412   -0.00148    0.00022    0.00157
C10   1    0.640191    0.759504    0.362098    11.00000    0.01723    0.02205 =
         0.02487   -0.01361    0.00744   -0.00217
C11   1    0.599461    0.841857    0.410473    11.00000    0.04312    0.04531 =
         0.03342   -0.01540    0.00457    0.01065
AFIX 137
H11A  3    0.596353    0.908943    0.384182    11.00000   -1.50000
H11B  3    0.647351    0.846592    0.461917    11.00000   -1.50000
H11C  3    0.528620    0.822729    0.416271    11.00000   -1.50000
AFIX   0
N1    5    0.932301    0.505430    0.079016    11.00000    0.04895    0.10724 =
         0.04928    0.01267    0.02910    0.04165
rem AFIX  93
H1A   3    0.901700    0.514138    0.029099    11.00000   -1.20000
H1B   3    0.992428    0.470461    0.094342    11.00000   -1.20000
rem AFIX   0
N2    5    0.493505    0.904394    0.117579    11.00000    0.05836    0.03964 =
         0.03430    0.00849    0.00331    0.02762
rem AFIX  93
H2A   3    0.474688    0.903907    0.066331    11.00000   -1.20000
H2B   3    0.469378    0.951565    0.144766    11.00000   -1.20000
rem AFIX   0
N3    5    0.920074    0.491494    0.210684    11.00000    0.02308    0.03592 =
         0.03251   -0.00155    0.01015    0.01119
rem AFIX  43
H3    3    0.977282    0.450962    0.219198    11.00000   -1.20000
rem AFIX   0
N4    5    0.573900    0.843547    0.242711    11.00000    0.02030    0.02262 =
         0.02980   -0.00222    0.00403    0.00988
rem AFIX  43
H4    3    0.523974    0.881982    0.253653    11.00000   -1.20000
rem AFIX   0
O5    6    0.370708    0.620915    0.005395    11.00000    0.03683    0.04779 =
         0.04950   -0.00245    0.00831    0.00897
H5WA  3    0.386828    0.682304   -0.002462    11.00000   -1.50000
H5WB  3    0.320399    0.614588    0.027552    11.00000   -1.50000
O6    6    1.134444    0.389013    0.078274    11.00000    0.06725    0.10172 =
         0.07115    0.00149    0.00486    0.00902
H6WA  3    1.098008    0.336367    0.064489    11.00000   -1.50000
H6WB  3    1.156875    0.397420    0.126007    11.00000   -1.50000
O7    6    0.985507    0.275468    0.547657    11.00000    0.09956    0.07432 =
         0.04753    0.00259    0.01473   -0.00828
H7WA  3    0.942953    0.251306    0.508841    11.00000   -1.50000
H7WB  3    0.960233    0.281961    0.587431    11.00000   -1.50000
HKLF    4


REM  c99_4_cr1_RT
REM R1 =  0.0519 for    4584 Fo > 4sig(Fo)  and  0.0862 for all    6386 data
REM    399 parameters refined using     27 restraints

END

WGHT      0.0226      0.0000

REM Instructions for potential hydrogen bonds
HTAB O3 N14_$3
HTAB O3 N15_$4
HTAB O4 O5
HTAB O4 O5_$5
HTAB C6 O7
HTAB C8 O2_$8
HTAB N1 O6_$9
HTAB N1 O6
HTAB N2 N16_$5
HTAB N3 N14_$4
HTAB N4 N12_$1
HTAB O5 N16_$5
HTAB O5 N17_$1
HTAB O6 O7_$6
HTAB O6 N14_$4
HTAB O7 N17
HTAB O7 N15_$7

REM Highest difference peak  1.293,  deepest hole -1.100,  1-sigma level  0.195
Q1    1   0.7327  0.6878  0.2523  11.00000  0.05    1.29
Q2    1   1.0460  0.3834  0.6187  11.00000  0.05    1.07
Q3    1   0.6335  0.6836  0.1540  11.00000  0.05    1.00
Q4    1   0.6657  0.5485  0.2166  11.00000  0.05    0.98
Q5    1   0.6964  0.5395  0.1914  11.00000  0.05    0.96
Q6    1   0.5956  0.6149  0.2167  11.00000  0.05    0.95
Q7    1   0.6252  0.5487  0.1563  11.00000  0.05    0.88
Q8    1   0.6980  0.6730  0.1940  11.00000  0.05    0.88
Q9    1   0.7648  0.6132  0.1949  11.00000  0.05    0.84
Q10   1   0.8188  0.1789  0.2977  11.00000  0.05    0.79
Q11   1   0.7021  0.6353  0.2985  11.00000  0.05    0.77
Q12   1   0.6588  0.6063  0.2595  11.00000  0.05    0.76
Q13   1   0.6459  0.6854  0.2052  11.00000  0.05    0.75
Q14   1   0.7355  0.5377  0.2455  11.00000  0.05    0.74
Q15   1   0.6867  0.7427  0.1404  11.00000  0.05    0.74
Q16   1   1.1293  0.3988  0.0075  11.00000  0.05    0.74
Q17   1   0.4721  0.6202  0.3123  11.00000  0.05    0.72
Q18   1   0.7865  0.7081  0.1902  11.00000  0.05    0.71
Q19   1   0.6167  0.6116  0.3570  11.00000  0.05    0.70
Q20   1   0.6862  0.7266  0.5398  11.00000  0.05    0.70
Q21   1   0.8384  0.4660  0.2819  11.00000  0.05    0.68
Q22   1   0.3232  0.5379  0.0377  11.00000  0.05    0.68
Q23   1   0.6754  0.2434  0.2071  11.00000  0.05    0.67
Q24   1   1.0449  0.3854  0.3346  11.00000  0.05    0.67
Q25   1   0.6748  0.1127  0.2532  11.00000  0.05    0.67
Q26   1   0.6742  0.6108  0.1041  11.00000  0.05    0.67
Q27   1   0.9803  0.1217  0.4570  11.00000  0.05    0.66
Q28   1   0.7434  0.5348  0.4612  11.00000  0.05    0.66
Q29   1   0.9093  0.1628  0.3588  11.00000  0.05    0.66
Q30   1   0.9043  0.4683  0.0142  11.00000  0.05    0.65
Q31   1   0.5980  0.5828  0.2899  11.00000  0.05    0.65
Q32   1   0.7318  0.6978  0.6112  11.00000  0.05    0.65
Q33   1   0.6794  0.4788  0.1330  11.00000  0.05    0.65
Q34   1   0.6448  0.5860  0.2497  11.00000  0.05    0.65
Q35   1   0.8108  0.6530  0.5284  11.00000  0.05    0.64
Q36   1   0.5464  0.6007  0.1175  11.00000  0.05    0.63
Q37   1   0.6048  0.9863  0.1085  11.00000  0.05    0.63
Q38   1   0.7547  0.8189  0.4417  11.00000  0.05    0.63
Q39   1   0.6405  0.1813  0.2442  11.00000  0.05    0.63
Q40   1   0.6340  0.5429  0.0962  11.00000  0.05    0.63
Q41   1   1.1971  0.4943  0.0795  11.00000  0.05    0.62
Q42   1   0.9980  0.2707  0.1878  11.00000  0.05    0.62
Q43   1   0.8571  0.0563  0.3142  11.00000  0.05    0.62
Q44   1   0.5709  0.9019  0.4920  11.00000  0.05    0.62
Q45   1   0.6179  0.2166  0.0390  11.00000  0.05    0.62
Q46   1   0.5466  1.0135  0.3820  11.00000  0.05    0.61
Q47   1   0.8612  0.4773  0.4834  11.00000  0.05    0.61
Q48   1   0.4983  0.5775  0.2723  11.00000  0.05    0.60
Q49   1   0.8026  0.6046  0.3728  11.00000  0.05    0.60
Q50   1   0.6187  0.8533  0.2944  11.00000  0.05    0.60
Q51   1   0.7368  0.0802  0.3425  11.00000  0.05    0.59
Q52   1   0.7457  0.6152  0.4977  11.00000  0.05    0.59
Q53   1   0.8960  0.5574  0.4947  11.00000  0.05    0.59
Q54   1   0.2802  0.6762  0.0259  11.00000  0.05    0.58
Q55   1   0.6343  0.7895  0.2767  11.00000  0.05    0.58
Q56   1   0.8357  0.8579  0.1833  11.00000  0.05    0.58
Q57   1   0.6069  0.8456  0.4664  11.00000  0.05    0.58
Q58   1   0.5398  0.1604  0.0145  11.00000  0.05    0.58
Q59   1   0.8634  0.5172  0.2417  11.00000  0.05    0.58
Q60   1   0.3420  0.6163  0.0438  11.00000  0.05    0.57
Q61   1   0.7632  0.2214  0.2254  11.00000  0.05    0.57
Q62   1   1.0827  0.3851  0.1596  11.00000  0.05    0.57
Q63   1   0.7415  0.4897  0.2399  11.00000  0.05    0.57
Q64   1   0.6200  0.7599  0.0731  11.00000  0.05    0.56
Q65   1   0.3395  0.6795 -0.0245  11.00000  0.05    0.56
Q66   1   0.4797  0.6409  0.2335  11.00000  0.05    0.56
Q67   1   0.8201  0.7781  0.2014  11.00000  0.05    0.56
Q68   1   0.8018  0.6799  0.1318  11.00000  0.05    0.56
Q69   1   0.3970  0.9150  0.0083  11.00000  0.05    0.56
Q70   1   0.5975  0.6112  0.0817  11.00000  0.05    0.56
Q71   1   0.7798  0.6017  0.4739  11.00000  0.05    0.56
Q72   1   0.4182  0.5562  0.0510  11.00000  0.05    0.56
Q73   1   0.6642  0.5017  0.4272  11.00000  0.05    0.56
Q74   1   0.6735  0.1016  0.1927  11.00000  0.05    0.55
Q75   1   0.8706  0.4001  0.2005  11.00000  0.05    0.55
Q76   1   1.0658  0.3833  0.2535  11.00000  0.05    0.55
Q77   1   0.9062  0.3829  0.4855  11.00000  0.05    0.55
Q78   1   0.4584  0.5993  0.1515  11.00000  0.05    0.55
Q79   1   0.3888  1.0116  0.1684  11.00000  0.05    0.55
Q80   1   0.5816  1.0007  0.2016  11.00000  0.05    0.55
Q81   1   0.8529 -0.0390  0.3065  11.00000  0.05    0.55
Q82   1   0.8154  0.5388  0.5103  11.00000  0.05    0.54
Q83   1   0.6173  0.4385  0.0852  11.00000  0.05    0.54
Q84   1   0.8439  0.6068  0.1104  11.00000  0.05    0.54
Q85   1   1.1594  0.3384  0.0390  11.00000  0.05    0.54
Q86   1   0.8014  0.2641  0.2190  11.00000  0.05    0.53
Q87   1   1.2184  0.5112  0.1482  11.00000  0.05    0.53
Q88   1   0.8287  0.6377  0.0391  11.00000  0.05    0.53
Q89   1   0.7579  0.6778  0.4651  11.00000  0.05    0.53
Q90   1   0.7644  0.6164  0.3249  11.00000  0.05    0.52
Q91   1   0.6664  0.1672  0.0796  11.00000  0.05    0.52
Q92   1   0.7989  0.6132  0.2486  11.00000  0.05    0.52
Q93   1   0.5828  0.9487  0.1859  11.00000  0.05    0.52
Q94   1   1.0444  0.2423  0.3721  11.00000  0.05    0.52
Q95   1   0.9557  0.4744  0.4486  11.00000  0.05    0.52
Q96   1   0.6965  0.8802  0.4324  11.00000  0.05    0.52
Q97   1   0.7837  0.4423  0.3263  11.00000  0.05    0.52
Q98   1   0.8996  0.0597  0.2407  11.00000  0.05    0.52
Q99   1   0.2979  0.6612  0.0779  11.00000  0.05    0.52
Q100  1   0.9390  0.3966  0.3941  11.00000  0.05    0.52
;
_shelx_res_checksum   86859

_shelx_hkl_file
;
   0   0   2 4544.71 97.7829   2
   0   0  -2 5569.40 98.3296   2
   0   0  -2 5878.61 96.8415   3
   0   0   3 3.04274 3.50888   2
   0   0  -3-0.42261 2.61315   3
   0   0  -3 0.70271 2.84986   2
   0   0  -4 1604.85 48.8721   2
   0   0   4 1824.18 35.9402   1
   0   0  -4 1599.26 45.1530   3
   0   0  -5 0.09620 3.42511   3
   0   0   5-0.43859 1.42369   1
   0   0  -5 0.17367 3.63801   2
   0   0   6 1353.72 33.1209   1
   0   0  -6 1422.54 46.6414   3
   0   0  -6 1265.79 48.9681   2
   0   0  -7-0.64361 4.87831   3
   0   0  -7 0.89973 3.69842   2
   0   0   7-2.57026 1.39103   1
   0   0   8 187.813 11.5954   1
   0   0  -8 192.026 18.4220   3
   0   0  -8 196.134 20.1871   2
   0   0   9 1.35752 2.15826   1
   0   0  -9-5.39244 8.05891   2
   0   0  -9-2.03059 5.78510   3
   0   0 -10 217.856 26.3954   2
   0   0 -10 280.690 25.2460   3
   0   0  10 238.655 15.2693   1
   0   0 -11-0.02550 6.60875   3
   0   0 -11-3.91488 7.70219   2
   0   0 -12 358.835 35.6039   2
   0   0 -12 448.007 35.9130   3
   0   0 -13 20.8513 18.7359   2
   0   0 -13-0.18654 4.62788   3
   0   0 -14 362.083 35.7341   3
   0   0 -14 369.475 38.3845   2
   0   0 -15-4.39044 6.42257   3
   0   0 -16 28.0432 9.62260   3
   0   0 -17-3.32807 5.62784   3
   0   0 -18 19.3980 8.18248   3
   0   0 -19-10.5310 9.26589   3
   0   0 -20 58.8411 17.5659   3
   0   0 -21-5.61778 8.16550   3
   0   0 -22 115.749 29.3201   3
   0   0 -23 1.38914 13.6702   3
   0   1   0 0.26218 1.02403   1
   0  -1   0 3.04641 2.18622   1
   0  -1   1 48.3967 4.11652   1
   0  -1   1 62.9224 4.69754   3
   0   1  -1 60.1804 4.99902   3
   0   1  -1 55.6756 4.33769   1
   0  -1  -2 51.5887 4.11835   2
   0  -1   2 44.1049 4.42992   1
   0   1  -2 38.9191 4.60407   1
   0   1   2 83.8378 6.32063   2
   0   1  -2 39.5502 5.03507   3
   0  -1   2 48.7852 5.58878   3
   0  -1  -3 456.026 15.7123   3
   0   1  -3 461.221 15.9752   1
   0   1  -3 445.883 19.5588   3
   0  -1   3 412.786 15.5869   1
   0  -1  -3 487.632 18.5246   2
   0   1   3 420.076 17.3375   2
   0  -1   3 419.658 19.3126   3
   0   1   4 636.802 25.1750   2
   0  -1  -4 675.493 23.2390   3
   0   1  -4 658.844 27.1298   3
   0  -1  -4 636.482 24.8756   2
   0  -1   4 632.782 21.1980   1
   0  -1  -5 362.359 21.0628   2
   0   1  -5 275.153 22.5551   2
   0  -1   5 402.157 16.9613   1
   0  -1  -5 391.827 18.9917   3
   0   1  -5 380.441 21.5743   3
   0   1   5 380.195 21.3535   2
   0   1  -6 7.36536 4.04482   2
   0   1   6 18.6396 5.61824   2
   0   1  -6 20.3771 6.31088   3
   0  -1  -6 16.6241 4.94379   3
   0  -1   6 17.7438 4.09036   1
   0  -1  -6 16.3052 5.10603   2
   0   1  -7 1423.99 49.8046   3
   0  -1  -7 1485.68 50.8596   2
   0   1  -7 1357.10 55.4280   2
   0  -1  -7 1485.66 45.9649   3
   0  -1   7 1437.23 37.4797   1
   0   1   7 1401.82 51.2651   2
   0  -1  -8 37.6387 6.73912   3
   0   1  -8 23.9403 7.42131   2
   0   1   8 52.8445 11.1289   2
   0  -1  -8 38.7059 8.66052   2
   0   1  -8 40.8353 10.1998   3
   0  -1   8 44.8214 7.53167   1
   0   1   8 36.1491 4.01608   1
   0   1   9 246.765 11.4841   1
   0   1  -9 266.283 25.0554   3
   0  -1   9 283.323 17.4850   1
   0  -1  -9 272.227 22.6839   3
   0  -1  -9 246.182 23.4048   2
   0   1  -9 236.437 27.3668   2
   0  -1 -10 1.75128 4.13897   3
   0   1 -10 6.19781 3.30370   3
   0  -1 -10-1.46344 7.78941   2
   0  -1  10 0.84093 1.82569   1
   0   1 -10-5.09608 10.6425   2
   0   1 -11 41.4794 12.4029   3
   0   1 -11 30.0188 8.60877   2
   0  -1 -11 39.5959 13.1095   2
   0  -1 -11 33.6824 7.66026   3
   0   1 -12 54.8924 18.3400   2
   0   1 -12 71.1491 12.1156   3
   0  -1 -12 79.9979 17.2203   2
   0  -1 -12 75.7279 14.5661   3
   0   1 -13 39.1816 10.1755   3
   0  -1 -13 85.0190 17.2208   2
   0  -1 -13 33.6480 10.8401   3
   0   1 -13 44.9074 11.2523   2
   0   1 -14 152.664 23.3403   3
   0  -1 -14 153.224 22.5561   3
   0  -1 -14 206.991 30.6382   2
   0   1 -15 294.445 34.1472   3
   0  -1 -15 335.546 33.9382   3
   0  -1 -15 273.130 35.8117   2
   0   1 -16 286.863 35.2656   3
   0  -1 -16 280.746 32.5140   3
   0   1 -17 339.966 40.6257   3
   0  -1 -17 368.296 37.2030   3
   0   1 -18 142.486 26.5911   3
   0  -1 -18 160.165 25.9904   3
   0   1 -19 135.690 23.3470   3
   0  -1 -19 133.621 25.9207   3
   0   1 -20 65.4203 17.8067   3
   0  -1 -20 94.8618 24.3329   3
   0   1 -21 43.7762 22.2642   3
   0  -1 -21 25.4709 6.46164   3
   0   1 -22 20.2010 11.3678   3
   0  -1 -22 19.8644 14.8479   3
   0  -1 -23-0.84831 7.42967   3
   0  -2   0 158.786 7.79487   3
   0   2   0 134.301 7.60082   3
   0   2   1 3507.34 66.8243   1
   0   2  -1 3352.85 69.1056   1
   0   2  -1 3392.90 67.7218   3
   0  -2   1 3424.61 68.3736   3
   0  -2   1 3550.66 70.6546   1
   0  -2   2 69.4851 6.88785   1
   0  -2  -2 61.3856 4.70990   2
   0   2  -2 66.6217 7.13123   3
   0  -2   2 69.2906 7.72319   3
   0   2   2 80.0848 5.33850   2
   0   2  -2 76.9762 7.30677   1
   0   2  -3 976.934 33.5262   3
   0   2  -3 837.535 29.9183   1
   0  -2  -3 1013.37 25.1441   2
   0   2   3 995.378 27.5492   2
   0  -2   3 1044.22 31.8094   1
   0  -2   3 992.962 33.5699   3
   0   2  -4 28.7726 5.86046   3
   0  -2  -4 26.6876 4.50433   2
   0  -2   4 27.9308 5.08889   1
   0  -2  -4 33.8292 4.68915   3
   0   2   4 31.7975 5.21097   2
   0  -2   4 33.2807 7.56535   3
   0   2  -4 34.6954 5.82787   1
   0  -2   5 377.806 19.5296   1
   0  -2  -5 397.334 17.5376   3
   0   2  -5 373.146 22.9973   3
   0  -2  -5 339.570 17.5653   2
   0   2   5 361.686 19.3370   2
   0  -2   6 3.40765 4.16708   1
   0   2  -6-2.59757 4.05547   3
   0  -2  -6-1.45975 2.58470   3
   0  -2  -6-1.43741 3.89005   2
   0   2   6 3.99480 4.27307   2
   0  -2  -7 29.2505 6.50572   3
   0  -2  -7 32.3740 6.82176   2
   0   2  -7 21.1891 5.28814   3
   0  -2   7 21.5014 4.99413   1
   0   2   7 29.1829 6.77345   2
   0   2  -8 5.50931 4.70614   3
   0   2  -8-0.18316 8.69350   2
   0  -2  -8-0.88644 3.70717   2
   0  -2   8 2.11270 3.96686   1
   0   2   8 1.57923 5.15710   2
   0  -2  -8 7.42216 4.94747   3
   0   2  -9 121.113 19.0375   2
   0  -2  -9 260.887 20.6962   3
   0  -2   9 264.984 18.8101   1
   0   2  -9 257.408 24.7996   3
   0   2   9 203.071 22.9363   2
   0  -2  -9 268.699 23.4076   2
   0  -2  10 88.0171 12.1769   1
   0   2 -10 93.6168 15.2580   3
   0  -2 -10 109.923 14.2412   3
   0  -2 -10 111.950 15.2311   2
   0   2 -10 89.4206 17.4877   2
   0   2  10 51.2576 12.4367   2
   0  -2 -11 638.286 37.4221   3
   0   2 -11 578.814 45.0409   2
   0  -2 -11 686.691 43.5807   2
   0   2 -11 587.235 42.7542   3
   0   2 -12-0.40656 8.53384   2
   0   2 -12 2.73967 3.61863   3
   0  -2 -12-0.70157 8.75292   2
   0  -2 -12 0.52475 6.18838   3
   0   2 -13 326.329 35.0965   3
   0  -2 -13 353.489 30.4571   3
   0  -2 -13 395.017 37.5087   2
   0  -2 -14 7.83722 6.92827   3
   0   2 -14-4.23496 9.24620   3
   0  -2 -14 4.94184 7.91589   2
   0  -2 -15 88.0351 16.5481   3
   0  -2 -15 106.634 23.9439   2
   0   2 -15 95.7040 18.8331   3
   0  -2 -16-0.56924 9.28768   3
   0   2 -16 1.79303 10.4265   3
   0   2 -17-3.31647 9.48336   3
   0  -2 -17-0.46831 4.37732   3
   0   2 -18-7.72572 8.85195   3
   0  -2 -18 0.40083 3.95744   3
   0   2 -19 80.4855 22.1983   3
   0  -2 -19 79.9864 20.8038   3
   0  -2 -20-12.9284 11.4552   3
   0   2 -20-2.91719 7.80974   3
   0  -2 -21 125.714 22.4850   3
   0   2 -21 152.597 35.2611   3
   0   2 -22 9.54711 9.18620   3
   0   3   0 1.10228 2.62629   3
   0  -3   0 3.42551 2.75901   3
   0   3   0 3.20417 2.65960   1
   0   3   1-0.13503 1.95970   1
   0   3  -1-0.36728 2.48369   1
   0   3  -1 0.89820 2.44683   3
   0   3   1-1.76558 1.66292   3
   0  -3   1 4.95640 3.58228   3
   0  -3  -1 0.83399 1.02992   3
   0  -3   1 1.86772 2.15521   1
   0   3   2 777.580 22.9610   2
   0  -3   2 830.549 29.5789   3
   0  -3   2 898.068 32.0907   1
   0   3   2 754.720 25.7183   1
   0   3  -2 642.420 27.2352   1
   0   3  -2 837.567 29.5058   3
   0   3   3 14.6984 2.58050   1
   0  -3   3 13.3526 4.38470   3
   0   3   3 15.8113 2.53440   2
   0  -3  -3 14.3328 3.31078   2
   0  -3   3 11.8991 5.31320   1
   0   3  -3 16.9177 4.00070   1
   0   3  -3 15.5060 4.81913   3
   0   3  -4 953.344 34.0830   1
   0  -3   4 812.885 35.2747   3
   0  -3  -4 874.468 25.5253   2
   0  -3   4 736.589 31.7057   1
   0   3   4 845.168 29.1390   2
   0   3  -4 828.646 35.0938   3
   0  -3  -4 818.121 20.7281   3
   0   3  -5 461.551 23.7659   1
   0  -3  -5 445.200 16.3457   3
   0   3   5 541.905 26.7729   2
   0   3  -5 440.258 26.7314   3
   0  -3   5 387.985 23.1016   1
   0  -3  -5 433.170 17.7817   2
   0   3   6 1201.23 41.9204   2
   0  -3  -6 1173.53 32.7644   3
   0   3  -6 1198.62 48.3803   3
   0  -3   6 1286.54 44.1017   1
   0  -3  -7 64.5668 7.95669   3
   0  -3   7 80.5220 11.4329   1
   0  -3  -7 65.9790 7.91747   2
   0   3  -7 62.9841 11.1458   3
   0   3   7 68.4284 12.0087   2
   0   3  -8 705.531 41.6804   3
   0   3   8 639.064 34.1935   2
   0  -3  -8 784.055 34.0560   2
   0  -3   8 642.349 33.2367   1
   0  -3  -8 665.788 29.4636   3
   0   3   9 18.1781 6.72135   2
   0   3  -9 6.47968 4.21200   2
   0  -3  -9 16.4366 4.61629   3
   0  -3  -9 17.1331 4.09076   2
   0  -3   9 13.1501 6.43892   1
   0   3  -9 21.6925 8.26500   3
   0   3 -10 193.995 30.6343   2
   0   3  10 199.910 22.9552   2
   0  -3 -10 204.293 19.5646   2
   0   3 -10 234.498 26.7140   3
   0  -3 -10 224.964 19.9807   3
   0   3 -11 15.5255 8.89656   2
   0   3 -11 40.3421 9.29899   3
   0  -3 -11 47.6709 8.74655   2
   0  -3 -11 27.1578 6.68849   3
   0   3  11 25.3706 10.9322   2
   0  -3 -12 22.6294 8.69561   2
   0   3 -12 24.9338 9.01661   3
   0  -3 -12 30.4129 8.47852   3
   0   3 -12 23.2645 9.16417   2
   0  -3 -13 39.6807 10.9017   2
   0  -3 -13 41.0251 11.0781   3
   0   3 -13 38.6471 15.6594   3
   0   3 -14 171.070 26.1860   3
   0  -3 -14 189.582 22.7735   2
   0  -3 -14 162.409 20.0707   3
   0  -3 -15 121.294 17.8315   3
   0   3 -15 117.220 22.1341   3
   0  -3 -15 127.707 20.4284   2
   0  -3 -16 208.461 26.5025   3
   0   3 -16 180.937 29.9753   3
   0   3 -17 161.091 28.2762   3
   0  -3 -17 146.064 21.9142   3
   0  -3 -18 169.260 24.1796   3
   0   3 -18 127.816 21.8867   3
   0  -3 -19 99.2756 22.0281   3
   0   3 -19 104.635 27.6188   3
   0  -3 -20 70.2394 16.4025   3
   0   3 -20 95.9879 24.5620   3
   0   3 -21 32.7220 22.2347   3
   0   4   0 1094.33 31.4597   3
   0  -4   0 1069.37 31.7151   3
   0   4   0 985.499 35.6883   1
   0  -4   1 29.0512 5.58456   3
   0   4   1 8.89666 3.35659   1
   0   4  -1 26.1309 5.80081   3
   0  -4  -1 23.6300 4.32627   3
   0   4  -1 12.8735 4.74949   1
   0   4   1 19.2833 3.73072   3
   0   4  -2 535.244 24.4213   3
   0  -4   2 522.590 24.9758   3
   0   4  -2 573.955 26.8590   1
   0   4   2 546.775 20.7580   2
   0   4   2 518.022 23.3600   1
   0   4   3 0.04005 2.51114   1
   0   4  -3 1.71591 4.20618   3
   0   4  -3 2.14652 3.52535   1
   0   4   3 1.94029 1.64788   2
   0  -4   3 1.94648 2.39468   1
   0  -4   3 6.66724 5.17754   3
   0   4  -4 388.752 23.4891   1
   0   4  -4 352.456 23.8660   3
   0   4   4 357.073 17.7235   1
   0  -4  -4 352.569 16.3338   2
   0   4   4 377.877 16.6155   2
   0  -4   4 301.815 22.0588   1
   0  -4   4 360.365 24.0025   3
   0   4  -5 124.008 15.1584   3
   0   4  -5 134.232 13.6443   1
   0   4   5 138.448 10.1743   1
   0  -4   5 154.239 15.3227   1
   0   4   5 164.099 12.7944   2
   0  -4  -5 132.801 9.83212   2
   0   4   6-3.05864 1.18882   1
   0  -4  -6-0.92849 1.62273   3
   0   4   6 4.57048 2.98147   2
   0  -4  -6-2.06178 1.26255   2
   0   4  -6-1.94186 5.50995   3
   0  -4   6 2.55462 4.99232   1
   0   4  -6-0.71409 4.20008   1
   0  -4   7 23.7033 8.34780   1
   0  -4  -7 31.1630 5.48240   2
   0   4   7 39.9698 5.73739   2
   0  -4  -7 31.9224 3.83736   3
   0   4  -7 35.8126 10.8704   3
   0   4   7 27.8034 4.56053   1
   0   4   8 94.3642 13.6066   2
   0  -4   8 90.4044 14.3141   1
   0   4  -8 88.1651 14.6620   3
   0   4   8 90.4923 6.82018   1
   0  -4  -8 92.6280 9.19853   3
   0  -4  -8 93.0947 9.22602   2
   0  -4  -9 187.482 14.6963   2
   0   4   9 161.759 19.1968   2
   0  -4  -9 170.618 13.9405   3
   0   4  -9 164.235 21.2576   3
   0  -4 -10 428.618 24.9174   3
   0   4  10 441.503 31.7726   2
   0  -4 -10 546.663 28.3948   2
   0   4 -10 238.881 30.4499   2
   0   4 -10 447.053 36.7167   3
   0   4 -11 126.629 21.4186   3
   0   4  11 126.417 18.7388   2
   0  -4 -11 122.327 14.2803   3
   0  -4 -11 124.031 13.8211   2
   0   4 -12 165.135 23.8128   3
   0  -4 -12 172.632 17.4350   3
   0   4  12 101.625 22.1075   2
   0  -4 -12 192.301 17.7243   2
   0   4 -13 24.8640 8.47251   3
   0   4  13 24.7983 14.4992   2
   0  -4 -13 37.8558 7.35543   2
   0  -4 -13 35.5207 5.20578   3
   0   4 -14 117.974 24.3071   3
   0  -4 -14 147.923 18.4867   3
   0  -4 -14 108.254 15.6198   2
   0   4 -15 18.3096 8.56427   3
   0  -4 -15 13.9028 9.79124   2
   0  -4 -15 16.0040 4.07378   3
   0  -4 -16 1.77257 3.77364   3
   0  -4 -16 17.4287 8.42175   2
   0   4 -16 8.88221 6.65824   3
   0   4 -17 9.04559 6.63594   3
   0  -4 -17 0.28621 6.78370   3
   0   4 -18 10.9500 6.04599   3
   0  -4 -18 11.2633 7.53217   3
   0  -4 -19 2.24058 11.8297   3
   0   4 -19 18.2446 12.7383   3
   0   4 -20 94.4603 28.7492   3
   0   4 -21 4.40775 10.3050   3
   0   5   0 0.69239 2.98337   3
   0  -5   0-1.60952 1.93647   3
   0   5   0 0.97971 2.32715   1
   0   5  -1 170.901 13.1049   3
   0  -5  -1 152.875 10.4880   3
   0   5   1 145.360 14.2996   1
   0   5  -1 140.629 16.0232   1
   0  -5   1 157.474 13.1437   3
   0   5   1 177.449 10.4211   3
   0   5  -2 68.4393 8.82385   3
   0   5   2 64.3393 7.01327   2
   0   5   2 64.1119 5.32815   3
   0   5  -2 56.9267 9.40108   1
   0  -5   2 65.2810 6.60142   3
   0   5   2 58.0485 8.90784   1
   0  -5   3 423.592 25.5302   3
   0   5  -3 433.856 25.8434   3
   0   5   3 417.545 22.3669   1
   0   5   3 473.493 20.7892   2
   0   5  -3 388.423 25.1857   1
   0   5   4 446.687 20.3232   2
   0   5  -4 468.175 28.3503   1
   0   5  -4 441.411 27.3704   3
   0   5   4 454.953 22.3690   1
   0   5   5 1793.05 49.8356   1
   0   5  -5 1740.48 63.8953   3
   0   5  -5 1764.14 61.4920   1
   0   5   5 1891.10 49.6380   2
   0   5  -6 290.241 24.9272   3
   0   5  -6 277.963 22.4263   1
   0   5   6 301.403 20.6586   2
   0   5   6 289.088 16.5908   1
   0  -5  -6 291.772 16.7836   2
   0   5  -7 1287.57 58.1241   3
   0   5   7 1372.46 50.0756   2
   0  -5  -7 1327.38 39.2219   2
   0   5   7 1273.00 37.7101   1
   0  -5  -7 1159.17 29.9038   3
   0  -5  -8 13.8564 4.28511   2
   0   5   8 61.4706 13.9253   2
   0  -5  -8 22.2750 4.38705   3
   0   5  -8 33.0570 11.8087   3
   0   5   8 15.0156 4.52175   1
   0  -5  -9 527.016 22.8145   3
   0   5   9 528.803 20.4993   1
   0  -5  -9 552.176 25.5405   2
   0   5   9 501.948 32.2638   2
   0   5  -9 552.600 40.3490   3
   0   5 -10 1.72057 8.65857   3
   0  -5 -10 5.55584 3.22871   2
   0   5  10 1.25904 3.78955   2
   0  -5 -10 8.76065 4.31511   3
   0  -5 -11 72.8541 9.15000   2
   0   5  11 57.5120 13.4515   2
   0   5 -11 67.3911 16.5343   3
   0  -5 -11 69.8590 9.20310   3
   0   5 -12 5.64352 6.83011   3
   0  -5 -12 9.63801 5.93481   2
   0   5  12-0.94627 8.96510   2
   0  -5 -12 1.96095 3.27432   3
   0  -5 -13 23.5687 6.45208   3
   0  -5 -13 9.72525 5.67737   2
   0   5  13 13.6930 8.94344   2
   0   5 -13 25.3232 11.3420   3
   0   5  14 32.4355 17.0367   2
   0   5 -14 53.3765 14.8951   3
   0  -5 -14 70.4987 11.7589   3
   0  -5 -14 83.5686 12.7870   2
   0  -5 -15 29.5740 9.76774   3
   0   5 -15 38.2030 14.8376   3
   0  -5 -15 45.2414 10.0769   2
   0   5 -16 71.2810 21.3715   3
   0  -5 -16 75.8456 13.2534   3
   0   5 -17 59.4615 24.6357   3
   0  -5 -17 73.8429 16.2206   3
   0  -5 -18 81.8223 17.0551   3
   0   5 -18 70.8681 19.9653   3
   0   5 -19 96.8033 26.3520   3
   0   5 -20 17.1310 12.7478   3
   0   6   0 50.3914 7.90121   3
   0   6   0 28.0040 6.84354   1
   0   6  -1 338.722 23.8869   1
   0   6  -1 355.214 21.3992   3
   0   6   1 253.729 21.5267   1
   0   6   1 339.087 16.6217   3
   0   6   2 83.0828 10.4768   2
   0   6   2 95.7646 7.54760   3
   0   6  -2 90.5436 13.0657   1
   0   6  -2 90.6649 11.7861   3
   0   6   2 79.9776 11.7786   1
   0   6   3 644.977 26.8346   2
   0   6   3 398.833 12.9821   3
   0   6   3 525.844 28.2774   1
   0   6  -3 570.499 34.2004   1
   0   6  -3 571.020 31.3091   3
   0   6  -4 11.4820 6.48665   3
   0   6  -4 9.78606 4.75234   1
   0   6   4 7.13721 2.48982   2
   0   6   4 15.8871 5.90481   1
   0   6   5 5.75577 1.89618   1
   0   6   5 0.80213 1.93409   2
   0   6  -5 0.65659 6.49313   3
   0   6  -5 1.89255 6.48608   1
   0   6   6 113.811 11.7758   1
   0   6   6 123.163 12.6730   2
   0   6  -6 125.741 16.9551   3
   0   6  -6 132.632 16.4813   1
   0   6  -7 372.507 31.2705   3
   0   6   7 399.616 21.6363   1
   0   6   7 347.577 22.8909   2
   0   6  -7 338.110 27.6847   1
   0   6  -8 95.0926 16.5380   3
   0   6   8 95.2946 14.3807   2
   0  -6  -8 84.1942 9.80820   2
   0   6   8 86.5599 9.24160   1
   0  -6  -9 186.387 9.95170   3
   0   6   9 202.632 14.1985   1
   0   6  -9 183.410 24.6662   3
   0   6   9 206.561 20.0784   2
   0  -6  -9 217.404 15.7184   2
   0  -6 -10 328.725 19.9389   2
   0  -6 -10 319.485 15.7842   3
   0   6  10 317.775 26.8921   2
   0   6 -10 345.473 35.1635   3
   0   6 -11 436.226 41.4161   3
   0  -6 -11 464.658 22.2533   3
   0   6  11 443.053 34.7146   2
   0  -6 -11 477.974 25.6865   2
   0   6 -12 410.002 40.7034   3
   0  -6 -12 466.247 23.9556   3
   0  -6 -12 458.796 26.0879   2
   0   6  12 390.119 33.0152   2
   0  -6 -13 316.602 20.8491   3
   0  -6 -13 301.629 22.6545   2
   0   6 -13 278.348 35.2694   3
   0   6  13 329.064 31.1241   2
   0   6 -14 173.435 28.4243   3
   0   6  14 103.098 21.0109   2
   0  -6 -14 192.418 18.5649   3
   0  -6 -14 185.326 17.6247   2
   0   6 -15 138.150 28.1289   3
   0  -6 -15 136.536 15.4804   3
   0  -6 -16 7.32049 2.16143   3
   0   6 -16 9.15944 10.3198   3
   0   6 -17 9.85931 9.95451   3
   0   6 -18 3.43393 15.4863   3
   0   6 -19 12.7239 12.2930   3
   0   7   0 3.04091 2.07635   3
   0   7   0 4.85325 4.81875   1
   0   7   1-0.77790 2.62188   3
   0   7   1-0.80085 3.66765   1
   0   7  -1-2.67622 3.12322   3
   0   7  -1 2.34628 4.07215   1
   0   7  -2 186.564 17.8766   3
   0   7  -2 208.630 21.4452   1
   0   7   2 209.786 12.0647   3
   0   7   2 187.429 18.4423   1
   0   7  -3 1.00795 2.92360   1
   0   7  -3 1.64017 2.75198   3
   0   7   3 3.56744 4.36676   1
   0   7   3 0.51690 1.09767   3
   0   7   3 0.05305 2.39118   2
   0   7  -4 789.422 42.6590   3
   0   7  -4 912.415 46.4601   1
   0   7   4 918.941 35.9114   2
   0   7   4 839.139 38.7571   1
   0   7   5 41.3931 7.27988   1
   0   7  -5 26.2546 8.65507   3
   0   7  -5 42.5744 11.3241   1
   0   7   5 32.8957 6.70829   2
   0   7  -6 1076.21 54.4647   3
   0   7   6 1046.35 42.0235   1
   0   7   6 1107.02 39.6688   2
   0   7  -6 1290.84 55.9581   1
   0   7  -7 21.1043 9.59101   3
   0   7   7 5.30449 1.70383   1
   0   7  -7 13.6048 8.93932   1
   0   7   7 31.4234 9.94858   2
   0   7   8 1099.99 41.5789   1
   0   7  -8 1056.59 58.3787   3
   0   7   8 1015.63 45.7281   2
   0   7   9 24.4722 14.8540   2
   0   7   9 8.85898 2.86529   1
   0   7  -9 19.3898 12.1288   3
   0   7  10 384.293 22.5942   1
   0   7 -10 388.283 36.7646   3
   0  -7 -10 455.603 24.5475   2
   0   7  10 438.416 32.3211   2
   0   7  11 8.46611 10.4681   2
   0  -7 -11 3.22799 1.56865   3
   0   7 -11 7.55900 10.0013   3
   0  -7 -11 4.49655 3.79333   2
   0  -7 -12 2.57023 2.19897   3
   0  -7 -12-1.38029 4.15445   2
   0   7  12 10.5686 8.16835   2
   0   7 -12 11.8030 6.24669   3
   0  -7 -13 9.51777 3.28186   2
   0   7 -13 6.94438 5.05625   3
   0  -7 -13 8.49118 1.16432   3
   0   7  13 18.6483 8.77636   2
   0  -7 -14 80.8608 9.34147   3
   0   7 -14 54.8365 16.9878   3
   0   7  14 106.121 20.2318   2
   0   7 -15 62.9705 19.0046   3
   0   7  15 54.9536 18.5494   2
   0   7 -16 35.7268 21.0101   3
   0   7 -17 19.4810 10.6011   3
   0   7 -18 52.0038 17.3770   3
   0   8   0 550.184 27.7824   3
   0   8   0 528.012 34.5979   1
   0   8  -1 168.581 16.1884   3
   0   8   1 184.408 19.4417   1
   0   8   1 169.282 13.4906   3
   0   8  -1 165.955 19.7980   1
   0   8   2 131.824 14.5941   2
   0   8   2 181.579 12.0649   3
   0   8   2 166.339 18.2143   1
   0   8  -2 169.091 17.9321   3
   0   8  -2 151.583 19.6077   1
   0   8   3 293.444 23.4058   1
   0   8   3 294.785 22.0526   2
   0   8  -3 308.808 28.1337   1
   0   8  -3 324.417 25.9439   3
   0   8   3 281.534 12.7194   3
   0   8  -4 43.8076 12.7072   3
   0   8   4 46.3113 8.62468   1
   0   8   4 48.9121 9.65265   2
   0   8  -4 71.9787 15.9853   1
   0   8  -5 13.9477 7.48330   3
   0   8   5 8.65368 4.57556   2
   0   8   5 4.23132 4.40239   1
   0   8   6 148.272 16.1932   1
   0   8   6 132.458 13.9679   2
   0   8  -6 115.990 18.3358   3
   0   8   7 274.213 20.8254   2
   0   8   7 242.075 20.6412   1
   0   8  -7 210.314 24.4185   3
   0   8   8 247.121 20.9953   1
   0   8   8 257.562 22.1524   2
   0   8  -8 237.070 26.9307   3
   0   8   9 193.002 19.3029   1
   0   8  -9 218.627 27.7186   3
   0   8   9 213.406 23.6926   2
   0   8 -10 351.470 37.3911   3
   0   8  10 360.565 30.2432   2
   0   8 -11 145.629 24.6849   3
   0   8  11 154.392 20.1743   2
   0   8 -12 397.074 42.2179   3
   0   8  12 362.552 34.6484   2
   0   8 -13 122.618 25.9490   3
   0   8  13 120.258 19.9892   2
   0   8 -14 193.748 31.9519   3
   0   8  14 228.056 25.7425   2
   0   8 -15 69.9641 19.4459   3
   0   8 -16 22.1861 14.6580   3
   0   8 -17-12.0561 14.4935   3
   0   8 -18 35.2876 25.3622   3
   0   9   0-0.93178 2.66619   3
   0   9   0 8.63802 6.11804   1
   0   9  -1 65.7471 10.9828   3
   0   9   1 62.1957 9.08910   3
   0   9   1 67.2258 12.9264   1
   0   9   2 0.97931 2.68070   2
   0   9  -2 4.22395 4.94921   3
   0   9   2 3.75921 3.32070   1
   0   9   2 2.20113 1.51066   3
   0   9   3 416.041 28.2639   2
   0   9   3 435.260 31.8576   1
   0   9  -3 428.518 31.0330   3
   0   9   3 390.177 16.1142   3
   0   9   4 10.6901 5.99619   2
   0   9   4 9.56069 6.93700   1
   0   9  -4 11.1875 6.50021   3
   0   9  -5 1027.53 55.1776   3
   0   9   5 1060.20 49.9808   1
   0   9   5 1011.80 43.1100   2
   0   9   6 12.6640 3.44685   1
   0   9  -6 11.7396 8.64451   3
   0   9   6 8.73961 5.28168   2
   0   9   7 380.389 27.3552   2
   0   9   7 771.018 41.6468   1
   0   9  -7 712.424 48.4841   3
   0   9  -8 9.19785 7.48127   3
   0   9   8 10.7352 5.85712   1
   0   9   8 7.42747 6.62330   2
   0   9   9 351.145 29.3090   2
   0   9   9 404.377 28.3479   1
   0   9  -9 403.729 40.4710   3
   0   9  10 0.21587 8.99594   2
   0   9 -10-4.70519 7.42209   3
   0   9  11 40.2249 13.1234   2
   0   9 -11 39.3082 13.3972   3
   0   9  12 23.1828 12.3433   2
   0   9 -12 4.21317 9.06877   3
   0   9 -13-8.29308 10.3794   3
   0   9  13-27.9075 12.1309   2
   0   9 -14 27.1770 20.7139   3
   0   9 -15 93.2440 27.0232   3
   0   9 -16-3.01993 7.02831   3
   0   9 -17 67.3020 25.9775   3
   0  10   0 263.987 21.5074   3
   0  10   1 186.653 16.3602   3
   0  10  -1 197.789 19.9142   3
   0  10  -2 255.499 23.8910   3
   0  10   2 283.625 17.3556   3
   0  10   2 298.125 24.7371   2
   0  10  -3 94.8008 15.5389   3
   0  10   3 75.3134 7.51272   3
   0  10   3 83.5146 14.2669   2
   0  10   4 80.4585 12.7239   2
   0  10  -4 86.4947 15.7809   3
   0  10   4 82.9509 14.1432   1
   0  10   5 3.71852 2.80868   2
   0  10   5 4.40117 5.82377   1
   0  10  -5 1.71449 7.86071   3
   0  10   6 20.6168 6.17228   1
   0  10   6 9.98135 6.00268   2
   0  10  -6 13.8203 11.2969   3
   0  10  -7 64.5292 17.1979   3
   0  10   7 65.8021 11.0740   2
   0  10  -8 127.628 22.9090   3
   0  10   8 130.527 16.7199   1
   0  10   8 140.538 18.2770   2
   0  10   9 124.503 17.4312   2
   0  10  -9 128.975 25.4544   3
   0  10  10 141.264 19.6732   2
   0  10 -10 133.577 24.7128   3
   0  10 -11 186.106 30.3455   3
   0  10  11 217.740 25.0404   2
   0  10 -12 172.511 31.3578   3
   0  10  12 152.672 21.8302   2
   0  10 -13 126.239 25.9410   3
   0  10 -14 104.587 27.9979   3
   0  10 -15 19.3358 12.2419   3
   0  10 -16 10.4216 14.6178   3
   0  11   0-1.32688 2.21347   3
   0  11   1 5.38198 6.59031   3
   0  11  -1-1.92235 5.54454   3
   0  11  -2 131.807 17.3797   3
   0  11   2 174.563 14.9398   3
   0  11   2 153.259 19.7608   2
   0  11   3-1.23594 2.27593   3
   0  11  -3 3.77901 3.47002   3
   0  11   3 2.85959 4.10188   2
   0  11  -4 337.744 31.9276   3
   0  11   4 339.024 27.8110   2
   0  11  -5 19.4884 8.14856   3
   0  11   5 29.6277 8.32579   2
   0  11  -6 478.598 40.3973   3
   0  11   6 503.875 31.3186   2
   0  11   7 9.23182 4.53148   2
   0  11  -7 0.41512 3.28680   3
   0  11  -8 276.218 34.6128   3
   0  11   8 323.238 27.1472   2
   0  11  -9 0.37426 3.96325   3
   0  11   9 6.23432 6.28166   2
   0  11 -10 48.5236 14.8100   3
   0  11  10 60.3783 15.5122   2
   0  11 -11 4.02731 10.9321   3
   0  11 -12 1.49052 8.82729   3
   0  11 -13 8.29625 10.1406   3
   0  11 -14 84.1001 27.0270   3
   0  11 -15 21.5039 12.7087   3
   0  12   0 13.9843 9.19156   3
   0  12   1 630.798 32.4760   3
   0  12  -1 573.196 37.7948   3
   0  12   1 546.300 40.4200   2
   0  12  -2 0.15613 8.06011   3
   0  12   2 4.53036 6.28443   2
   0  12   2 8.23619 4.52766   3
   0  12   3 233.961 15.2018   3
   0  12   3 303.071 27.3767   2
   0  12  -3 273.491 27.7701   3
   0  12  -4 7.91074 10.5755   3
   0  12   4 14.0050 7.39034   2
   0  12   5 27.8132 9.30386   2
   0  12  -5 14.9834 3.22252   3
   0  12   6 33.6796 7.55578   2
   0  12  -6 44.9154 17.8962   3
   0  12  -7 5.48021 8.93315   3
   0  12   7 3.03315 5.95306   2
   0  12   8 107.719 16.6971   2
   0  12  -8 94.1209 18.9069   3
   0  12  -9 33.5381 8.62893   3
   0  12   9 31.1261 11.4213   2
   0  12 -10 131.019 26.0629   3
   0  12 -11 94.4578 23.6152   3
   0  12 -12 47.1268 18.5811   3
   0  12 -13 74.7601 22.6235   3
   0  12 -14-8.29183 13.2168   3
   0  13   0 6.49399 6.02416   3
   0  13  -1 52.8253 12.3038   3
   0  13   1 59.6220 10.2535   3
   0  13   1 65.8860 16.0745   2
   0  13   2 18.0520 10.6245   2
   0  13  -2 13.5066 4.56577   3
   0  13   3 132.356 18.6574   2
   0  13  -3 156.699 22.8766   3
   0  13  -4 21.9607 8.54895   3
   0  13   4 20.8516 7.46152   2
   0  13  -5 187.858 25.4961   3
   0  13   5 237.855 23.7502   2
   0  13  -6 9.49936 8.41705   3
   0  13   6 2.16621 6.12810   2
   0  13  -7 160.575 26.3395   3
   0  13   7 181.766 21.7078   2
   0  13  -8-1.36726 4.51397   3
   0  13  -9 65.3326 19.7025   3
   0  13 -10 5.39342 14.4324   3
   0  13 -11 18.3455 18.3311   3
   0  13 -12 27.5847 17.5021   3
   0  13 -13 54.0930 22.4310   3
   0  14   0 693.889 51.2764   2
   0  14   1 71.0864 17.9037   2
   0  14  -1 39.3190 8.56719   3
   0  14   2 422.041 38.4031   2
   0  14  -2 473.557 37.5305   3
   0  14   3 10.0566 4.72130   2
   0  14  -3 5.85954 8.76650   3
   0  14  -4 102.411 21.7777   3
   0  14   4 117.172 18.6724   2
   0  14   5-4.94719 2.94648   2
   0  14  -5-2.27947 12.6821   3
   0  14   6 18.2942 10.7130   2
   0  14  -6 21.8063 7.29452   3
   0  14  -7 20.4142 14.4891   3
   0  14  -8 18.3512 15.5749   3
   0  14  -9 22.5013 3.96973   3
   0  14 -10 50.5562 13.7256   3
   0  14 -11 24.1841 4.55876   3
   0  14 -12 95.4527 24.7163   3
   0  15   0 9.26567 6.94903   2
   0  15  -1 2.41806 9.90590   2
   0  15   1-4.18368 6.56975   2
   0  15   2 60.1174 16.1592   2
   0  15   3 18.9951 10.7533   2
   0  15   4 126.058 22.0377   2
   0  15  -5 83.3183 18.9478   3
   0  15  -6 167.791 29.0266   3
   0  15  -7 40.7274 7.87587   3
   0  15  -8 109.593 24.5433   3
   0  15  -9 7.45982 11.2508   3
   0  15 -10 3.49668 11.2417   3
   0  16   0 0.09499 16.1954   2
   0  16   1 311.191 36.3160   2
   0  16  -1 256.331 36.7172   2
   0  16   2 17.6937 11.6538   2
   0  16  -2-0.79713 14.1847   2
   0  16  -9 11.6692 8.40968   3
   0  17   0-8.39109 5.75845   2
   0  17  -1-1.59174 16.2978   2
   0  17  -2 26.7252 19.2698   2
   1   0 -23-20.6078 22.1269   3
   1   0 -22 14.5687 15.8930   3
   1   0 -21 10.2818 6.05259   3
   1   0 -20 131.907 20.6721   3
   1   0 -19 17.6113 8.46227   3
   1   0 -18 83.2460 19.1158   3
   1   0 -17-3.93233 8.18173   3
   1   0 -16 55.4112 13.0242   3
   1   0 -15 6.74375 10.2508   3
   1   0 -15-6.13192 9.13891   2
   1   0 -14 26.4271 10.7728   2
   1   0 -14 27.7138 9.48559   3
   1   0 -13-0.43206 5.94581   3
   1   0 -13 0.39912 8.18682   2
   1   0 -12 146.803 21.2058   3
   1   0 -12 125.542 20.9275   2
   1   0 -11 1.99358 2.77738   3
   1   0 -11-2.21346 11.1656   2
   1   0 -10 1105.22 55.3259   2
   1   0 -10 1174.85 52.9260   3
   1   0  -9 7.03581 5.12417   2
   1   0  -9-2.81534 5.61157   3
   1   0  -8 1374.55 55.5304   2
  -1   0   8 1343.22 49.6675   3
   1   0  -8 1415.94 52.2238   3
   1   0  -7-4.31897 3.56116   3
   1   0  -7 0.02629 4.63559   2
  -1   0   7 0.05409 3.01700   3
  -1   0   6 1856.60 52.8852   3
   1   0  -6 1963.66 54.3493   3
   1   0  -6 2005.25 38.4000   1
  -1   0   5-1.00053 2.75303   3
   1   0  -5-0.74798 1.21776   1
   1   0  -5 0.51822 3.66426   3
   1   0  -4 1518.66 41.0179   3
  -1   0   4 1460.35 40.0520   3
   1   0  -3 0.09547 2.89490   3
  -1   0   3-1.48443 1.83691   3
   1   0  -2 5.00429 2.39796   3
  -1   0   2 8.57034 2.30196   3
  -1   0   1 0.83505 1.59932   3
   1   0  -1 2.66391 1.39933   3
   1   0   0 590.834 17.7460   2
  -1   0   0 534.858 15.8051   2
  -1   0  -1 1.25360 2.96123   2
   1   0   1 0.35091 2.33243   2
   1   0   2 1415.14 40.6185   2
  -1   0  -2 1414.48 40.0861   2
  -1   0  -3 0.91919 5.03702   2
   1   0   3 1.94142 2.72795   2
  -1   0  -4 3390.85 84.3782   2
   1   0   4 3433.79 84.9439   2
  -1   0  -5-6.78434 6.34361   2
   1   0   5 4.04121 4.75000   2
   1   0   6 2731.29 84.5489   2
  -1   0  -6 2606.55 81.1935   2
  -1   0  -7-0.03475 5.07464   3
  -1   0  -7 2.03145 5.39282   2
   1   0   7-2.08310 7.16818   2
  -1   0  -8 2325.31 76.6609   3
  -1   0  -8 2360.52 84.1852   2
   1   0   8 2382.96 87.7523   2
  -1   0  -9-0.69552 3.44860   3
  -1   0  -9 5.75965 4.89631   2
   1   0  10 278.219 17.2548   1
  -1   0 -10 248.210 25.2418   3
  -1   0 -10 250.471 27.0887   2
  -1   0 -11 2.53103 7.55799   2
   1   0  11-2.33056 3.37913   1
  -1   0 -11 4.87571 7.17320   3
   1   0  12 8.10502 2.74060   1
  -1   0 -12 15.7470 11.8219   2
  -1   0 -12 0.88447 6.63437   3
  -1   0 -13 12.7341 12.8926   2
   1   0  13 5.16824 3.84130   1
  -1   0 -13-3.36622 6.05539   3
  -1   0 -14 226.418 29.2158   3
  -1   0 -15 2.41827 7.83602   3
  -1   0 -16 88.4439 20.0908   3
  -1   0 -17-7.40494 5.14478   3
  -1   0 -18 41.6534 14.0964   3
  -1   0 -19 7.34092 7.41714   3
  -1   0 -20-4.59175 6.61135   3
  -1   0 -21-14.2990 18.4432   3
  -1   0 -22 44.5324 20.4053   3
   1  -1 -23 64.5824 20.2560   3
   1   1 -23 85.2506 26.9936   3
   1  -1 -22 40.8048 10.5850   3
   1   1 -22 51.6982 22.1890   3
   1  -1 -21 33.1780 6.48700   3
   1   1 -21 16.2281 5.19007   3
   1   1 -20 20.7719 15.5534   3
   1  -1 -20 32.1831 16.8081   3
   1  -1 -19-5.50418 7.51052   3
   1   1 -19 3.82005 5.93723   3
   1   1 -18-1.75287 5.79968   3
   1  -1 -18 24.5171 17.4906   3
   1   1 -17 69.9879 17.0355   3
   1  -1 -17 79.9797 18.2347   3
   1  -1 -16 107.007 19.7677   3
   1  -1 -16 118.509 25.1498   2
   1   1 -16 90.8347 19.2964   3
   1  -1 -15 114.869 17.1565   3
   1  -1 -15 109.673 17.6169   2
   1   1 -15 129.455 22.7951   3
   1   1 -14 301.328 32.7595   3
   1  -1 -14 356.809 35.1747   2
   1  -1 -14 287.832 30.5113   3
   1   1 -14 182.040 30.1000   2
   1  -1 -13 325.452 30.0524   3
   1  -1 -13 325.100 32.4198   2
   1   1 -13 232.438 31.5584   2
   1   1 -13 339.826 32.4462   3
   1  -1 -12 514.167 35.6386   3
   1  -1 -12 537.789 39.9784   2
   1   1 -12 514.211 38.7744   3
   1   1 -12 363.770 35.1104   2
   1   1 -11 682.943 42.7827   3
   1  -1 -11 698.285 40.4113   3
   1   1 -11 562.940 43.4958   2
   1  -1 -11 665.090 43.9621   2
   1  -1 -10 289.151 29.5657   2
   1   1 -10 381.268 33.9160   2
   1  -1 -10 428.265 29.2477   3
   1   1 -10 450.743 32.3101   3
   1   1  -9 104.752 15.5445   3
   1  -1  -9 62.0393 11.9253   2
   1  -1  -9 105.803 13.1076   3
   1   1  -9 30.7551 8.65066   2
  -1  -1   9 100.021 13.4847   3
  -1   1   8 103.342 12.4293   3
   1   1  -8 125.474 15.9196   3
  -1  -1   8 129.632 14.9828   3
   1  -1  -8 121.577 13.2610   3
   1  -1  -8 81.2970 13.8639   2
   1  -1  -7 13.9458 6.85197   2
  -1   1   7 5.33644 4.01947   3
   1   1  -7 1.67983 4.92907   3
  -1  -1   7 9.80144 4.51861   3
   1  -1  -7 4.61964 4.06297   3
   1   1  -7-1.10312 1.82959   1
   1   1  -6 2.24841 1.79414   1
  -1   1   6-0.50463 2.99956   3
   1   1  -6-1.15583 4.62932   3
   1  -1  -6-1.07778 3.37682   3
  -1  -1   6 0.30679 4.01238   3
   1  -1  -6-0.54441 3.74329   2
  -1  -1   5 97.2189 10.0781   3
   1   1  -5 128.114 12.5455   3
   1  -1  -5 116.420 9.68021   3
   1   1  -5 109.330 8.04229   1
   1  -1  -5 84.2175 9.49507   2
  -1   1   5 107.129 8.89252   3
  -1  -1   4 4.39934 2.61455   3
   1  -1  -4 5.55279 3.29065   2
  -1   1   4 4.13544 1.99509   3
   1  -1  -4 1.71692 2.33506   3
   1   1  -4 2.92191 2.64434   3
  -1   1   3 144.047 7.83693   3
   1  -1  -3 133.616 7.75653   3
   1   1  -3 138.114 10.3496   3
  -1  -1   3 139.630 10.2137   3
   1   1  -2 261.167 12.4630   3
  -1  -1   2 258.226 12.2317   3
   1  -1  -2 278.808 9.34735   3
  -1   1   2 265.069 9.29312   3
  -1  -1   1 1349.26 31.0564   3
   1   1  -1 1291.88 31.0272   3
   1  -1   0 458.750 16.6293   2
  -1  -1   0 450.530 13.2572   3
  -1   1   0 503.501 15.7733   2
  -1  -1   0 468.657 14.0762   2
   1   1   0 470.593 13.5828   3
  -1  -1  -1 916.203 22.4071   2
   1  -1   1 848.360 28.1491   2
  -1   1  -1 782.677 26.2344   2
   1   1   1 716.586 22.4422   2
  -1  -1  -2 2.13324 2.16540   2
  -1   1  -2 0.56263 3.50420   2
   1  -1   2 1.20730 3.48468   2
   1   1   2-3.94668 2.75679   2
   1   1   3 4.71564 3.77334   2
  -1   1  -3 0.97939 2.82474   2
  -1  -1  -3 16.1519 6.06623   2
   1  -1   3 0.63548 4.92620   2
  -1   1  -4 374.313 23.7163   2
   1  -1   4 394.911 25.9850   2
   1   1   4 402.155 22.8069   2
  -1  -1  -4 379.641 22.3701   2
  -1   1  -5 661.697 34.8799   2
  -1  -1  -5 697.391 32.8584   2
   1   1   5 696.999 34.3022   2
  -1   1  -6 584.053 34.0383   2
   1   1   6 534.994 31.3767   2
  -1   1  -6 559.488 31.0175   3
  -1  -1  -6 543.672 30.8388   2
  -1  -1  -7 409.183 28.0075   2
  -1   1  -7 396.974 29.7913   2
  -1   1  -7 404.198 28.0983   3
   1   1   7 425.305 30.1050   2
  -1  -1  -8 364.297 25.6502   3
  -1   1  -8 316.032 29.3140   2
  -1  -1  -8 352.267 27.4110   2
   1  -1   8 375.322 21.1918   1
   1   1   8 368.629 29.4907   2
  -1   1  -8 389.655 29.1087   3
  -1   1  -9 702.358 42.3873   3
  -1   1  -9 708.433 45.2399   2
  -1  -1  -9 687.207 39.2138   3
   1   1   9 633.739 45.1740   2
  -1  -1  -9 735.334 44.1755   2
   1  -1   9 658.472 29.6011   1
   1  -1  10 666.121 30.4207   1
  -1  -1 -10 675.207 43.5762   2
   1   1  10 578.340 44.6645   2
  -1  -1 -10 626.901 39.4358   3
  -1   1 -10 560.219 42.6092   2
  -1   1 -10 636.771 41.5330   3
   1  -1  11 785.638 34.8373   1
  -1  -1 -11 740.635 44.6158   3
   1   1  11 777.089 28.1161   1
  -1  -1 -11 833.737 51.4097   2
  -1   1 -11 707.248 46.3251   3
  -1   1 -11 568.459 45.8572   2
  -1   1 -12 286.145 29.5652   3
   1  -1  12 313.029 21.8899   1
  -1  -1 -12 327.030 30.5145   3
   1   1  12 339.767 17.5096   1
  -1  -1 -12 373.433 35.0092   2
  -1   1 -12 251.875 31.3113   2
  -1  -1 -13 308.309 35.2058   2
  -1  -1 -13 266.388 27.5698   3
   1  -1  13 336.092 23.3728   1
   1   1  13 286.348 16.5762   1
  -1   1 -13 295.965 32.7564   3
  -1   1 -14 50.4625 16.4792   3
  -1  -1 -14 57.3348 16.4491   3
   1  -1  14 58.5091 11.8574   1
  -1  -1 -14 43.9782 18.9370   2
  -1   1 -15 49.9422 18.5160   3
  -1  -1 -15 44.0725 12.8103   3
  -1  -1 -16-5.89054 10.0578   3
  -1   1 -16-3.93084 7.30948   3
  -1  -1 -17-7.97756 7.78065   3
  -1   1 -17 6.43513 4.62569   3
  -1  -1 -18 63.5891 16.6857   3
  -1   1 -18 82.7940 20.7932   3
  -1  -1 -19 46.1070 8.85849   3
  -1   1 -19 75.3238 20.7092   3
  -1  -1 -20 119.508 24.8555   3
  -1   1 -20 67.2456 20.5661   3
  -1   1 -21 62.0817 27.4220   3
  -1  -1 -21 55.5475 16.1655   3
  -1  -1 -22 65.0661 24.2064   3
  -1   1 -22 72.3575 17.4592   3
   1  -2 -22 10.9064 11.4543   3
   1   2 -22 14.0361 17.3502   3
   1   2 -21 96.2081 20.5584   3
   1  -2 -21 82.5710 23.3084   3
   1   2 -20 25.0076 17.3831   3
   1  -2 -20 23.0107 9.75302   3
   1   2 -19 122.660 27.5403   3
   1  -2 -19 159.974 25.9468   3
   1  -2 -18 23.5071 9.92023   3
   1   2 -18 22.3369 5.42624   3
   1   2 -17 160.938 27.0180   3
   1  -2 -17 164.574 25.5760   3
   1  -2 -16 58.7028 14.1151   3
   1  -2 -16 54.7662 22.3069   2
   1   2 -16 56.2450 16.4118   3
   1   2 -15 68.5807 16.9596   3
   1  -2 -15 100.711 18.2937   2
   1  -2 -15 70.0199 12.6318   3
   1  -2 -14 24.8252 5.99769   2
   1   2 -14 32.0747 14.6214   3
   1  -2 -14 30.5287 11.6838   3
   1   2 -13-2.62444 8.97974   2
   1  -2 -13-2.20916 6.02160   2
   1   2 -13 2.53822 5.26070   3
   1  -2 -13 4.32300 4.01488   3
   1  -2 -12 23.0198 8.76523   3
   1  -2 -12 21.5396 9.23878   2
   1   2 -12 23.3509 11.7597   3
   1   2 -12 22.1324 8.53202   2
   1  -2 -11 301.609 24.1094   3
   1  -2 -11 336.227 27.9210   2
   1   2 -11 328.834 30.8350   3
   1   2 -11 157.466 25.1607   2
   1  -2 -10 2.06622 4.66079   2
   1   2 -10 3.72198 6.99158   3
   1   2 -10-3.40256 6.57041   2
   1  -2 -10 2.53052 3.82320   3
   1  -2  -9 882.881 40.4986   2
   1   2  -9 831.542 44.7254   3
   1  -2  -9 857.772 37.6361   3
  -1  -2   9 805.481 42.4679   3
   1  -2  -8 222.091 17.9850   2
   1  -2  -8 195.077 15.9801   3
  -1  -2   8 199.240 19.5250   3
   1   2  -8 190.642 19.9986   3
   1   2  -8 192.323 14.3464   1
   1   2  -7 2220.41 61.4858   1
   1  -2  -7 2415.47 62.8952   2
   1   2  -7 2253.45 71.9089   3
   1  -2  -7 2327.35 60.3737   3
  -1  -2   7 2244.41 70.3753   3
  -1   2   6 16.7827 3.73381   3
   1   2  -6 13.9510 5.44986   3
  -1  -2   6 19.0245 5.70732   3
  -1   2   6 9.17043 3.97443   2
   1  -2  -6 19.8261 3.83700   3
   1  -2  -6 24.2759 4.75322   2
   1   2  -6 24.9101 4.23812   1
  -1  -2   5 236.202 17.4890   3
   1  -2  -5 286.860 12.9654   2
  -1   2   5 250.654 12.7291   3
   1   2  -5 264.453 18.0696   3
   1   2  -5 282.235 16.0738   1
  -1   2   5 224.469 13.1870   2
   1  -2  -5 262.696 13.2497   3
   1  -2  -4 139.388 7.87974   3
  -1   2   4 94.1887 7.90552   2
   1  -2  -4 146.187 6.64641   2
   1   2  -4 132.786 11.0136   1
  -1   2   4 134.939 7.58911   3
  -1  -2   4 127.703 11.9475   3
   1   2  -4 137.302 12.8860   3
   1  -2  -3 507.716 15.3994   1
  -1  -2   3 558.880 23.0326   3
   1   2  -3 578.563 23.8795   3
   1  -2  -2 54.6552 5.92189   1
  -1  -2   2 113.743 9.19396   3
   1   2  -2 110.360 9.16017   3
   1   2  -1 115.272 8.63477   3
  -1  -2   1 108.530 7.96520   3
   1   2   0 277.781 12.8462   2
  -1  -2   0 280.249 11.4551   3
   1   2   0 306.746 11.7419   3
   1   2   1 635.151 19.9961   2
  -1  -2  -1 477.973 17.8838   2
  -1  -2  -1 576.645 16.4751   3
   1   2   1 578.980 16.6105   3
   1   2   2 5.83879 2.24342   2
  -1  -2  -2 2.11349 1.64686   2
  -1   2  -3 2048.11 59.7475   2
   1   2   3 1613.25 45.6731   2
  -1  -2  -3 1647.60 41.7484   2
   1  -2   4 19.1629 4.44075   1
  -1  -2  -4 40.5830 6.51279   2
  -1   2  -4 23.6593 7.48464   2
   1   2   4 15.9524 5.17542   2
  -1   2  -5 1300.04 48.7790   3
  -1   2  -5 1285.05 54.1530   2
  -1  -2  -5 1233.20 41.8487   2
   1   2   5 1211.28 45.8831   2
   1  -2   5 1313.10 41.7909   1
  -1   2  -6 8.25062 3.93329   2
   1  -2   6 1.12975 3.01534   1
  -1  -2  -6 1.89210 3.52371   2
  -1   2  -6 1.79544 4.70753   3
   1   2   6-4.98176 3.86539   2
   1  -2   7 1355.56 45.5328   1
  -1   2  -7 1362.36 56.4993   3
   1   2   7 1310.77 55.6447   2
  -1  -2  -7 1475.38 54.3358   2
  -1   2  -7 1304.62 60.9804   2
   1  -2   8 32.1764 6.84003   1
  -1   2  -8 30.9931 10.2757   3
  -1   2  -8 38.3974 9.72044   2
  -1  -2  -8 37.7543 8.28510   3
   1   2   8 34.4114 9.04342   2
  -1  -2  -8 28.9606 9.27879   2
  -1   2  -9 104.986 20.5540   2
  -1   2  -9 119.741 19.6177   3
  -1  -2  -9 110.103 13.7266   3
   1   2   9 121.820 18.2987   2
  -1  -2  -9 103.880 18.1369   2
   1  -2   9 85.7725 11.6519   1
  -1  -2 -10 112.610 15.8042   3
  -1   2 -10 120.471 19.4103   3
  -1  -2 -10 126.448 21.6624   2
   1   2  10 109.585 20.1327   2
   1  -2  10 97.3312 12.5733   1
  -1   2 -10 69.1277 18.9753   2
   1   2  11-3.36422 7.42427   2
  -1   2 -11-4.68082 10.7073   2
  -1  -2 -11 4.36864 4.79920   3
   1  -2  11 0.00880 3.59119   1
  -1  -2 -11-1.45409 6.69535   2
  -1   2 -11 0.94685 5.15798   3
  -1   2 -12 52.6297 14.9349   3
  -1  -2 -12 53.1192 12.1350   3
  -1  -2 -12 75.3534 20.5518   2
   1   2  12 53.2350 15.5531   2
  -1   2 -12 54.3412 16.5826   2
   1  -2  12 50.7464 10.5009   1
   1   2  12 45.9251 5.19776   1
  -1  -2 -13 300.181 31.8058   2
  -1  -2 -13 295.685 29.4553   3
   1   2  13 259.817 12.9009   1
  -1   2 -13 262.256 30.8368   3
   1  -2  13 315.310 25.3545   1
   1  -2  14 30.4932 9.89214   1
  -1  -2 -14 21.3442 10.4990   3
  -1  -2 -14 26.5585 7.78479   2
  -1   2 -14 14.8224 4.58056   3
  -1  -2 -15 285.006 30.4703   3
  -1   2 -15 288.223 36.0541   3
  -1  -2 -16 121.509 19.2491   3
  -1   2 -16 119.422 25.5620   3
  -1  -2 -17 102.742 21.1266   3
  -1   2 -17 79.7436 21.6858   3
  -1  -2 -18 14.4502 6.38789   3
  -1   2 -18 42.2439 11.6656   3
  -1   2 -19 57.0678 20.8253   3
  -1  -2 -19 38.0993 11.6866   3
  -1   2 -20-2.86765 10.1569   3
  -1  -2 -20-6.26862 7.54625   3
  -1  -2 -21-70.6101 18.7835   3
  -1   2 -21 10.7359 22.2789   3
   1   3 -21 26.4438 17.6841   3
   1   3 -20 46.3477 22.6909   3
   1  -3 -20 8.87641 7.16248   3
   1  -3 -19 5.25304 3.59142   3
   1   3 -19 1.35851 12.6887   3
   1  -3 -18 15.1746 9.53037   3
   1   3 -18 3.19496 8.18664   3
   1   3 -17 47.8194 20.2370   3
   1  -3 -17 54.7553 9.97660   3
   1   3 -16 135.012 24.3974   3
   1  -3 -16 98.0247 18.3372   2
   1  -3 -16 124.096 20.0202   3
   1  -3 -15 210.176 24.0769   3
   1  -3 -15 202.185 20.8167   2
   1   3 -15 203.499 29.5315   3
   1  -3 -14 167.225 20.4567   3
   1  -3 -14 169.411 22.3015   2
   1   3 -14 181.029 24.7122   3
   1   3 -13 171.830 25.8711   3
   1  -3 -13 206.955 21.1313   3
   1  -3 -13 194.674 21.9914   2
   1  -3 -12 311.822 26.7781   2
   1   3 -12 350.620 34.1230   3
   1   3 -12 135.290 26.0833   2
   1  -3 -12 335.138 25.5796   3
   1   3 -11 336.687 32.6148   3
   1  -3 -11 323.013 24.3644   2
   1  -3 -11 356.623 25.4030   3
   1   3 -10 363.919 30.8599   3
   1  -3 -10 360.661 23.1933   2
   1  -3 -10 373.034 24.0623   3
  -1   3   9 37.1595 9.85137   2
   1  -3  -9 100.327 11.6230   3
   1   3  -9 100.926 15.9509   3
   1  -3  -9 97.5619 11.1916   2
   1   3  -9 112.037 12.6928   1
  -1  -3   9 106.400 15.7783   3
  -1   3   8 19.1847 7.64515   2
   1   3  -8 18.6952 9.03833   3
   1  -3  -8 22.3804 6.16010   2
   1   3  -8 15.3297 3.97073   1
  -1  -3   8 6.91617 3.46636   3
   1  -3  -8 17.5125 4.08105   3
   1   3  -7 44.8722 11.4423   3
   1   3  -7 47.9814 6.56188   1
   1  -3  -7 48.0256 6.16022   3
  -1  -3   7 47.6758 9.87579   3
   1  -3  -7 49.8606 6.31836   2
  -1   3   7 61.8921 8.73632   2
   1   3  -6 244.226 20.8126   3
  -1   3   6 229.206 15.3060   2
   1  -3  -6 255.364 13.0191   3
  -1  -3   6 230.841 19.7089   3
   1  -3  -6 258.828 11.6788   2
   1   3  -6 235.494 16.8132   1
  -1   3   5 22.5451 4.10363   2
   1   3  -5 15.5620 3.96088   1
   1  -3  -5 17.6104 2.94201   2
   1   3  -5 23.2442 3.56966   3
  -1  -3   5 18.5829 5.14580   3
   1  -3  -5 22.1034 3.13278   3
   1   3  -4 301.347 20.4681   3
  -1   3   4 290.806 11.7727   2
   1   3  -4 319.126 19.6066   1
  -1  -3   4 316.809 19.7612   3
   1   3  -3 268.551 17.5297   3
  -1  -3   3 273.963 17.4188   3
  -1   3   3 302.028 10.4889   2
   1  -3  -3 300.902 13.8740   1
   1  -3  -2 702.566 24.1200   1
  -1  -3   2 760.313 27.9625   3
   1   3  -2 743.621 27.7261   3
   1   3  -1 257.633 14.0928   3
  -1  -3   1 265.076 14.1150   3
   1  -3  -1 206.677 13.0235   1
   1  -3   0 1922.26 49.6635   1
  -1  -3   0 1839.23 43.2609   3
   1   3   0 1927.30 43.4394   3
   1   3   1 99.6763 8.58651   2
   1  -3   1 125.925 10.4551   1
  -1  -3  -1 134.162 7.92803   3
   1   3   1 143.754 7.74210   3
   1   3   2 211.758 12.6451   2
  -1  -3  -2 164.452 11.1866   2
  -1  -3  -2 188.290 8.80107   3
   1  -3   2 185.386 14.0960   1
  -1  -3  -3 96.3333 6.49857   3
  -1   3  -3 89.7413 10.9802   3
  -1  -3  -3 115.484 9.24864   2
   1   3   3 101.231 9.11390   2
   1  -3   3 87.4901 10.5224   1
  -1  -3  -4 23.1180 3.98430   2
  -1   3  -4 21.9961 6.48373   3
   1  -3   4 17.2256 5.24921   1
   1   3   4 23.0134 4.98191   2
   1   3   5 429.053 25.0461   2
   1  -3   5 336.927 21.9989   1
  -1  -3  -5 410.422 19.6051   2
  -1   3  -5 365.921 25.7866   3
   1  -3   6 125.313 13.1707   1
  -1   3  -6 137.819 17.9196   2
   1   3   6 138.050 15.0768   2
  -1  -3  -6 139.719 13.1019   2
  -1   3  -6 97.5593 13.4134   3
   1  -3   7 596.371 30.8212   1
   1   3   7 539.636 32.8571   2
  -1  -3  -7 590.890 29.1017   2
  -1   3  -7 585.678 41.6661   2
  -1   3  -7 552.422 36.5364   3
  -1   3  -8 955.215 49.8275   3
  -1   3  -8 783.726 50.0276   2
   1  -3   8 970.375 41.2535   1
   1   3   8 962.741 49.5550   2
  -1  -3  -8 965.975 39.4952   3
  -1  -3  -8 755.249 39.2396   2
  -1  -3  -9 499.952 30.7442   2
  -1   3  -9 549.908 42.1463   2
  -1  -3  -9 545.489 30.6270   3
   1   3   9 555.629 37.2505   2
  -1   3  -9 512.846 37.4153   3
   1  -3   9 594.903 32.6917   1
   1   3  10 588.252 40.6364   2
  -1   3 -10 624.699 48.9659   2
  -1  -3 -10 636.138 37.1833   2
  -1   3 -10 554.114 41.7902   3
   1  -3  10 615.140 34.8615   1
  -1  -3 -10 601.240 35.0363   3
   1   3  11 305.678 30.3431   2
   1  -3  11 281.174 24.1238   1
  -1   3 -11 274.136 29.4420   3
  -1  -3 -11 312.585 25.8557   3
  -1  -3 -11 310.335 27.1944   2
  -1   3 -11 265.169 32.3200   2
   1   3  12 216.583 27.8807   2
  -1  -3 -12 234.561 24.7547   2
  -1   3 -12 225.139 29.3762   3
   1  -3  12 261.869 23.4842   1
  -1  -3 -12 208.960 21.1147   3
  -1   3 -13 52.5414 16.8859   3
   1   3  13 41.1669 16.1614   2
   1  -3  13 40.5143 11.8228   1
  -1  -3 -13 49.6222 10.7362   2
  -1  -3 -13 48.3115 11.0080   3
  -1  -3 -14 120.213 19.2699   2
  -1   3 -14 83.7258 19.8717   3
  -1  -3 -14 103.296 15.9335   3
  -1   3 -15-4.96200 6.61047   3
  -1  -3 -15-4.44792 5.52620   2
  -1  -3 -15 1.68937 8.08162   3
  -1   3 -16-1.93164 5.83310   3
  -1  -3 -16-6.60132 6.03321   3
  -1  -3 -17 44.3114 12.2357   3
  -1   3 -17 54.1534 18.4481   3
  -1   3 -18 51.5763 15.5953   3
  -1  -3 -18 76.7800 17.1569   3
  -1  -3 -19 64.3854 17.7407   3
  -1   3 -19 27.9657 11.6071   3
  -1  -3 -20 102.452 20.5259   3
  -1   3 -20 138.585 31.3199   3
  -1   3 -21 71.9023 26.8694   3
   1   4 -21 25.9537 11.6795   3
   1   4 -20 118.193 28.7395   3
   1   4 -19 86.4877 24.5757   3
   1  -4 -19 68.4421 14.5564   3
   1   4 -18 166.801 31.2956   3
   1  -4 -18 163.702 23.5789   3
   1   4 -17 83.9031 20.3941   3
   1  -4 -17 116.633 17.1019   3
   1  -4 -16 73.7924 14.7669   3
   1   4 -16 63.6791 17.1110   3
   1   4 -15 16.6390 9.73460   3
   1  -4 -15 6.06266 7.99298   3
   1  -4 -15 16.3757 10.6549   2
   1  -4 -14 66.6016 10.0465   2
   1  -4 -14 78.0473 13.4702   3
   1   4 -14 72.6457 18.3884   3
   1  -4 -13 47.8547 7.77416   3
   1  -4 -13 35.0312 6.72730   2
   1   4 -13 46.0671 14.4946   3
   1  -4 -12 35.9820 7.14488   3
   1   4 -12 28.8671 9.69756   3
   1  -4 -12 35.2395 5.63363   2
   1   4 -11 41.7795 12.8950   3
   1  -4 -11 55.0617 8.48291   2
   1  -4 -11 38.4819 5.69219   3
   1  -4 -10 213.893 15.7748   2
  -1   4  10 281.440 23.6554   2
   1  -4 -10 341.283 20.4945   3
   1   4 -10 319.620 30.9147   3
   1   4  -9 12.4009 9.01688   3
   1   4  -9 10.3138 5.07208   1
   1  -4  -9 22.4889 6.40065   3
   1  -4  -9 16.5929 4.68115   2
  -1   4   9 21.0208 7.02143   2
  -1  -4   9 18.6127 8.58829   3
  -1   4   8 617.608 29.4500   2
  -1  -4   8 703.250 39.9909   3
   1  -4  -8 670.992 24.6169   3
   1  -4  -8 648.081 23.4040   2
   1   4  -8 654.248 40.3879   3
   1   4  -8 667.586 35.4677   1
   1  -4  -7 27.0020 4.23259   3
  -1   4   7 43.7833 8.70833   2
  -1  -4   7 28.3664 9.21854   3
   1   4  -7 24.5792 7.24036   1
   1  -4  -7 18.1806 3.90891   2
   1   4  -7 24.4507 5.08102   3
  -1   4   6 655.955 26.3985   2
   1   4  -6 566.701 33.9095   3
  -1  -4   6 589.517 33.5759   3
   1  -4  -6 608.724 19.9649   2
   1   4  -6 560.673 30.0625   1
   1  -4  -6 580.055 16.7453   3
  -1  -4   5 74.5385 11.6644   3
   1   4  -5 71.7042 12.1094   3
   1   4  -5 92.8177 11.2763   1
  -1   4   5 84.9519 7.87015   2
  -1  -4   4 51.5390 9.46211   3
   1   4  -4 71.3725 11.0071   3
  -1   4   4 61.9385 6.92443   1
  -1   4   4 72.4128 5.95376   2
   1   4  -4 63.7666 10.3157   1
   1   4  -3 13.0538 4.43221   3
  -1   4   3 11.7253 2.71179   2
  -1  -4   3 18.0212 6.13520   3
   1   4  -3 17.7288 4.49497   1
   1  -4  -3 13.5545 3.96259   1
  -1   4   3 15.9083 4.22253   1
  -1   4   2 104.336 6.13406   3
   1  -4  -2 118.873 10.5428   1
  -1  -4   2 113.604 11.3191   3
  -1   4   2 116.801 10.4616   1
   1   4  -2 112.553 11.1942   3
  -1  -4   1 124.858 10.9781   3
   1  -4  -1 93.8545 9.38585   1
  -1   4   1 140.262 10.0721   3
  -1   4   1 105.619 10.6882   1
   1   4  -1 130.880 11.3106   3
   1  -4   0 2445.69 63.7859   1
  -1   4   0 2581.31 64.7582   1
  -1  -4   0 2375.12 55.4385   3
  -1   4   0 2362.14 56.8020   3
   1   4   0 2381.41 54.8912   3
   1   4   1 536.031 18.4923   3
   1  -4   1 528.892 25.9894   1
  -1   4  -1 547.064 24.8359   3
  -1  -4  -1 504.031 18.6986   3
   1   4   1 499.399 22.2088   2
   1   4   2 1000.81 25.9741   3
  -1  -4  -2 955.679 25.7758   3
   1   4   2 1028.86 33.5518   2
   1  -4   2 1067.11 39.6163   1
  -1   4  -2 1026.57 37.8772   3
  -1  -4  -3 144.161 11.4686   2
  -1   4  -3 148.685 14.8036   3
   1   4   3 148.892 11.9946   2
   1  -4   3 108.634 13.3388   1
  -1  -4  -3 156.940 8.05456   3
  -1  -4  -4 2972.52 56.5456   3
  -1   4  -4 2958.98 81.9874   3
  -1  -4  -4 3375.69 68.4279   2
   1  -4   4 3343.79 81.0089   1
  -1  -4  -5 2.53529 2.90863   2
  -1   4  -5-0.32014 6.37507   3
   1   4   5 0.20750 4.05092   2
   1  -4   5 2.69138 3.12006   1
   1  -4   6 1302.59 50.1528   1
   1   4   6 1303.16 52.5103   2
  -1   4  -6 1375.74 57.5468   3
  -1  -4  -6 1322.80 42.2631   2
   1   4   7 34.0626 13.0081   2
  -1   4  -7 3.01264 7.95433   3
  -1  -4  -7 14.3129 4.59598   2
   1  -4   7-1.18632 3.27829   1
   1  -4   8 288.274 23.9229   1
  -1   4  -8 345.385 31.1727   3
   1   4   8 308.451 26.2112   2
  -1  -4  -8 340.404 21.3628   3
  -1   4  -8 323.144 34.4639   2
  -1  -4  -8 366.736 21.7826   2
  -1  -4  -9 63.0749 9.46957   2
  -1   4  -9 63.5224 15.7838   3
   1   4   9 59.7620 14.8696   2
   1  -4   9 51.7282 10.6141   1
  -1  -4  -9 63.9712 10.1402   3
  -1   4  -9 78.4684 18.2380   2
  -1   4 -10 9.17846 9.89231   3
   1   4  10-1.87964 5.88289   2
  -1  -4 -10-0.10836 3.25039   3
   1  -4  10 5.32978 4.22151   1
  -1  -4 -10 5.14082 3.64088   2
  -1   4 -10 2.73360 9.75811   2
   1   4  11 48.9183 13.3363   2
  -1  -4 -11 88.3361 12.8509   2
   1  -4  11 78.1886 15.2013   1
  -1   4 -11 54.7632 13.9895   3
  -1  -4 -11 67.9340 11.3286   3
   1   4  12 74.5751 13.7437   2
  -1   4 -12 72.2236 16.7435   3
  -1  -4 -12 77.1957 12.7143   3
   1  -4  12 69.7694 15.1030   1
  -1  -4 -12 82.2388 13.5692   2
   1  -4  13 110.431 17.7391   1
   1   4  13 101.621 20.0419   2
  -1  -4 -13 89.4180 15.2532   3
  -1  -4 -13 130.449 18.1946   2
  -1   4 -13 108.239 22.2134   3
   1   4  14 216.131 32.6320   2
  -1  -4 -14 240.644 25.3242   3
  -1   4 -14 227.059 32.4250   3
  -1  -4 -14 226.585 25.0479   2
  -1  -4 -15 149.237 18.9113   2
  -1  -4 -15 161.366 20.0616   3
  -1   4 -15 178.175 28.4275   3
  -1  -4 -16 129.000 20.9142   3
  -1   4 -16 110.733 24.1203   3
  -1   4 -17 112.595 25.7159   3
  -1  -4 -17 148.034 22.5115   3
  -1  -4 -18 140.146 22.4281   3
  -1   4 -18 150.240 30.4902   3
  -1   4 -19 9.76032 4.70360   3
  -1  -4 -19 24.9056 7.38639   3
  -1   4 -20 41.9748 24.1487   3
   1   5 -20 3.48851 12.3467   3
   1   5 -19 12.4109 8.99393   3
   1   5 -18 2.40745 10.3103   3
   1  -5 -18-6.37636 5.34796   3
   1   5 -17 34.9992 17.0556   3
   1  -5 -17 20.9700 7.84279   3
   1  -5 -16 74.6210 12.9324   3
   1   5 -16 69.1984 18.6764   3
   1   5 -15 264.464 35.6796   3
   1  -5 -15 308.993 24.9506   3
   1  -5 -15 279.689 21.1476   2
   1   5 -14 36.7049 14.1393   3
   1  -5 -14 33.9340 9.37701   3
   1  -5 -14 24.6980 4.35700   2
   1   5 -13 320.239 36.2635   3
   1  -5 -13 314.965 22.4483   3
   1  -5 -13 357.356 21.6193   2
  -1   5  12 33.5111 8.75041   2
   1  -5 -12 53.2543 7.66938   2
   1   5 -12 36.2398 10.6910   3
   1  -5 -12 53.6959 8.78580   3
   1  -5 -11 214.536 15.2573   3
   1   5 -11 202.118 26.6167   3
   1  -5 -11 254.954 16.3397   2
  -1   5  11 191.647 19.0317   2
   1  -5 -10 123.547 10.4206   2
   1  -5 -10 115.774 10.1374   3
   1   5 -10 123.549 19.5508   3
  -1   5  10 123.160 13.2506   2
   1   5 -10 103.558 14.3737   1
   1  -5  -9 15.3096 3.64832   3
   1   5  -9 12.6054 4.93455   1
   1  -5  -9 10.9972 4.36277   2
  -1  -5   9 6.52203 4.44196   3
   1   5  -9 12.8873 7.25347   3
  -1   5   9 18.9134 7.35429   2
  -1   5   8 402.660 23.3772   2
   1   5  -8 484.985 31.0109   1
   1  -5  -8 354.702 14.1892   3
   1   5  -8 376.117 31.5424   3
   1  -5  -8 382.894 17.5197   2
  -1  -5   8 473.873 34.1491   3
  -1   5   7 49.2222 6.47883   2
   1   5  -7 43.1169 10.5678   3
  -1  -5   7 61.4481 12.2474   3
   1   5  -7 60.5336 11.1206   1
   1  -5  -7 43.1873 4.99747   2
  -1   5   6 38.1236 6.51404   2
   1   5  -6 42.1473 12.0911   3
   1   5  -6 38.7374 8.42875   1
  -1  -5   6 51.8429 9.31107   3
   1   5  -5 532.274 32.7197   3
  -1   5   5 528.758 24.6839   1
  -1   5   5 541.875 19.7928   2
  -1  -5   5 516.604 30.9327   3
   1   5  -5 609.382 32.4724   1
   1   5  -4 173.059 16.8861   3
  -1   5   4 168.851 13.5899   1
  -1  -5   4 173.649 16.3048   3
   1   5  -4 131.334 15.3333   1
  -1   5   4 173.887 10.8005   2
  -1  -5   3 1622.29 52.8077   3
  -1   5   3 1599.73 41.8187   2
  -1   5   3 1342.52 50.8923   1
   1   5  -3 1727.89 54.6433   3
   1   5  -3 1772.77 57.1556   1
  -1  -5   2 61.0388 9.84675   3
   1   5  -2 61.0150 11.0878   3
  -1   5   2 54.6700 5.84682   3
   1  -5  -2 27.2665 7.16771   1
  -1   5   2 47.0234 7.89120   1
   1   5  -2 32.3702 7.81795   1
   1   5  -1 2109.05 63.7640   1
  -1  -5   1 2048.36 55.3599   3
  -1   5   1 2061.01 49.0964   3
   1   5  -1 2218.08 56.2435   3
   1  -5  -1 1639.52 56.8909   1
  -1   5   1 2208.15 62.0459   1
   1  -5   0 206.886 17.7788   1
  -1   5   0 230.232 18.4207   1
   1   5   0 290.860 17.1072   3
  -1  -5   0 282.963 17.6673   3
  -1   5   0 308.836 19.3155   3
  -1  -5  -1 1417.54 38.7790   3
   1   5   1 1442.71 45.2922   2
  -1   5  -1 1580.80 52.0328   1
  -1   5  -1 1479.25 46.2087   3
   1   5   1 1555.38 38.7361   3
   1  -5   1 1189.82 47.4991   1
  -1   5  -2 11.0782 6.00870   3
   1  -5   2 5.40148 5.11051   1
   1   5   2 9.88144 3.66524   2
   1   5   2 9.92784 3.17926   3
  -1  -5  -2 6.40345 2.06461   3
  -1   5  -3 273.047 21.2552   3
   1  -5   3 201.691 18.9326   1
  -1  -5  -3 245.215 11.2091   3
   1   5   3 282.204 17.4420   2
  -1  -5  -4 146.818 12.3161   2
  -1  -5  -4 133.116 7.51417   3
   1   5   4 147.123 12.3589   2
   1  -5   4 130.079 15.6181   1
  -1   5  -4 158.706 17.0196   3
   1  -5   5 47.6783 8.42921   1
  -1  -5  -5 56.8222 8.88464   2
   1   5   5 57.5616 8.78963   2
  -1  -5  -5 54.7323 5.10164   3
  -1   5  -5 28.4433 13.2709   3
   1  -5   6 152.369 17.3773   1
   1   5   6 158.908 16.3200   2
  -1  -5  -6 160.029 9.62107   3
  -1   5  -6 177.800 21.5196   3
  -1  -5  -6 172.991 13.8702   2
   1   5   7 180.185 19.6537   2
  -1  -5  -7 207.162 15.2629   2
   1  -5   7 181.066 19.6365   1
  -1   5  -7 174.111 21.1054   3
  -1  -5  -8 318.126 18.3286   3
  -1  -5  -8 343.426 21.3318   2
  -1   5  -8 294.402 29.0441   3
   1   5   8 298.399 27.0573   2
   1  -5   8 320.293 26.5227   1
  -1   5  -9 464.122 42.5068   2
  -1  -5  -9 577.373 29.4566   2
   1   5   9 468.705 35.2049   2
   1  -5   9 451.918 33.4536   1
  -1   5  -9 448.822 37.4247   3
  -1  -5  -9 499.134 25.4446   3
  -1   5 -10 133.192 21.1708   3
   1  -5  10 142.067 19.3829   1
  -1  -5 -10 155.898 14.5733   3
  -1  -5 -10 165.959 15.8305   2
   1   5  10 147.716 18.3647   2
   1  -5  11 362.044 31.2941   1
   1   5  11 377.798 34.7935   2
  -1   5 -11 343.434 35.6243   3
  -1  -5 -11 394.503 25.4567   2
  -1  -5 -11 380.896 24.6563   3
  -1  -5 -12 50.5306 10.6484   3
   1  -5  12 53.8675 14.2273   1
  -1   5 -12 50.6486 17.2622   3
   1   5  12 26.3338 10.7995   2
  -1  -5 -12 43.7159 7.50841   2
  -1  -5 -13 339.422 25.9570   3
  -1   5 -13 296.134 36.5925   3
   1   5  13 328.117 32.7076   2
  -1  -5 -13 321.799 25.1122   2
  -1  -5 -14 5.97847 6.19696   3
  -1  -5 -14 17.3182 9.44241   2
  -1   5 -14 4.96865 9.53571   3
   1   5  14 20.5310 5.66732   2
  -1  -5 -15 7.81441 5.59897   3
  -1   5 -15 38.6635 17.2390   3
  -1  -5 -15-4.10879 9.37945   2
   1   5  15 15.0133 18.2948   2
  -1   5 -16 5.07252 6.73697   3
  -1  -5 -16 12.0226 8.81625   3
  -1   5 -17 46.8694 11.8728   3
  -1  -5 -17 29.1717 7.64968   3
  -1   5 -18 34.7550 24.1241   3
  -1   5 -19 83.0610 29.3126   3
   1   6 -19 150.366 31.9224   3
   1   6 -18 148.410 32.4508   3
   1   6 -17 232.861 38.1749   3
   1   6 -16 74.6437 20.5795   3
   1  -6 -16 78.3205 12.8582   3
   1   6 -15 107.406 20.5134   3
   1  -6 -15 118.092 13.4006   3
   1  -6 -14 13.4420 5.98640   3
   1   6 -14 14.0654 11.5576   3
   1  -6 -13-1.83057 2.63975   3
   1   6 -13 1.05107 4.72601   3
  -1   6  13-0.73330 8.01934   2
   1  -6 -13 1.66059 4.12055   2
   1   6 -12 9.14246 11.2563   3
   1  -6 -12 10.6170 3.52674   2
   1  -6 -12 11.1689 3.40882   3
  -1   6  12-1.60416 6.20085   2
   1  -6 -11 60.9719 7.46062   2
   1   6 -11 57.5024 14.4330   3
  -1   6  11 62.5640 11.5783   2
   1  -6 -11 52.9331 6.32299   3
   1   6 -10 46.9421 8.05538   1
   1  -6 -10 39.6564 4.70498   3
   1   6 -10 48.4492 12.5634   3
  -1   6  10 38.0533 9.86413   2
   1  -6 -10 46.1200 5.75177   2
   1   6  -9 195.361 23.2081   3
  -1   6   9 213.857 19.0847   2
   1   6  -9 180.941 18.8671   1
  -1   6   8 102.259 13.1321   2
   1   6  -8 93.3360 14.7018   1
  -1  -6   8 106.132 16.3980   3
   1   6  -8 97.7112 17.3472   3
   1   6  -7 769.007 42.2262   1
  -1  -6   7 762.116 43.8855   3
   1   6  -7 704.147 42.6119   3
  -1   6   7 613.302 27.9779   2
  -1  -6   6 144.723 18.1427   3
  -1   6   6 155.565 11.8166   2
   1   6  -6 142.370 16.8483   1
   1   6  -6 142.824 18.6926   3
   1   6  -5 170.006 17.9653   1
  -1  -6   5 179.823 19.2654   3
  -1   6   5 192.065 16.0745   1
   1   6  -5 174.944 18.6669   3
  -1   6   5 182.887 11.8348   2
  -1   6   4 66.2631 7.46404   2
  -1  -6   4 62.5095 11.2400   3
   1   6  -4 74.7012 11.1409   1
   1   6  -4 74.5168 12.4412   3
  -1   6   4 67.1646 10.2633   1
  -1   6   3 43.5242 3.85069   3
   1   6  -3 46.6810 8.99953   3
  -1   6   3 58.1349 9.36180   1
  -1  -6   3 38.9385 8.04948   3
   1   6  -3 53.6773 9.11148   1
   1   6  -2 1.11699 2.71953   1
  -1   6   2 2.83813 2.85346   1
  -1   6   2 4.80817 2.94516   3
   1   6  -2 1.66927 4.13894   3
  -1  -6   2 3.76160 1.86065   3
   1   6  -1 196.342 18.1713   1
   1   6  -1 195.532 15.1108   3
  -1   6   1 188.858 18.0634   1
  -1   6   1 180.243 12.6693   3
  -1  -6   1 174.586 14.2575   3
   1  -6  -1 187.504 18.1087   1
  -1  -6   0 57.1212 7.54780   3
   1  -6   0 53.4110 10.2074   1
   1   6   0 36.5754 9.14709   1
  -1   6   0 59.7196 8.27398   3
   1   6   0 65.2674 8.03506   3
  -1   6   0 65.7428 11.1037   1
   1   6   1 424.017 27.2057   1
   1  -6   1 467.374 29.7692   1
  -1   6  -1 506.176 26.0503   3
   1   6   1 513.912 27.1448   2
  -1  -6  -1 479.550 21.3664   3
  -1   6  -1 508.511 30.5747   1
   1   6   1 563.148 22.3557   3
   1   6   2 284.125 19.2622   2
  -1   6  -2 309.688 22.1279   3
   1   6   2 320.770 14.5000   3
   1   6   2 267.184 20.4841   1
  -1   6  -2 139.464 19.6050   1
  -1  -6  -2 272.032 13.9190   3
   1  -6   2 339.030 25.4743   1
   1   6   3 679.335 30.4188   2
  -1  -6  -3 600.177 20.0007   3
   1   6   3 608.815 19.7768   3
   1  -6   3 621.621 35.9566   1
  -1   6  -3 619.306 33.8267   3
  -1   6  -4 48.4210 8.89019   3
   1  -6   4 48.6465 9.87389   1
   1   6   4 45.6952 7.65195   2
  -1  -6  -4 45.1950 4.40524   3
  -1   6  -5 586.426 36.5643   3
   1  -6   5 674.786 38.9935   1
   1   6   5 563.245 27.9546   2
   1   6   6 57.0426 10.0489   2
  -1  -6  -6 47.9217 7.81935   2
   1  -6   6 36.8215 9.05322   1
  -1   6  -6 44.8972 10.9631   3
   1  -6   7 237.613 25.0214   1
  -1   6  -7 266.275 26.2517   3
  -1  -6  -7 261.231 18.4362   2
   1   6   7 240.561 21.5994   2
  -1  -6  -7 241.614 12.5158   3
  -1  -6  -7 249.568 11.2978   3
  -1  -6  -8 25.4115 4.01305   3
   1   6   8 23.7494 5.02840   1
   1  -6   8 32.7483 9.46480   1
   1   6   8 41.0154 11.2720   2
  -1  -6  -8 24.0267 6.39412   2
  -1  -6  -8 30.6884 4.98052   3
  -1   6  -8 45.6802 15.4356   3
  -1  -6  -9 22.7923 5.43884   2
  -1   6  -9 13.9587 9.10343   3
  -1  -6  -9 22.2067 4.04118   3
   1   6   9 12.5587 3.94968   1
   1  -6   9 7.63810 4.44793   1
   1   6   9 23.0619 6.70473   2
  -1  -6 -10 38.8850 6.89484   2
   1   6  10 29.1911 9.69795   2
   1   6  10 32.6037 5.94441   1
   1  -6  10 30.8098 10.4290   1
  -1   6 -10 36.3266 15.2981   3
  -1  -6 -10 41.8100 7.11759   3
  -1  -6 -11 122.460 13.2260   3
  -1  -6 -11 113.141 13.0299   2
   1  -6  11 121.555 19.2169   1
  -1   6 -11 113.040 22.0011   3
   1   6  11 118.699 18.4154   2
  -1  -6 -12 283.195 20.8181   3
  -1   6 -12 293.845 35.1622   3
  -1  -6 -12 282.818 22.8680   2
   1   6  12 242.421 27.7951   2
  -1   6 -13 321.367 39.8163   3
  -1  -6 -13 336.415 24.0126   3
   1   6  13 362.040 36.5354   2
  -1   6 -14 164.813 28.2221   3
   1   6  14 193.820 28.0195   2
  -1  -6 -14 152.567 18.6169   2
  -1  -6 -14 185.431 18.3047   3
  -1   6 -15 283.733 37.1950   3
   1   6  15 327.113 38.9952   2
  -1  -6 -15 336.156 26.8416   3
  -1   6 -16 133.458 26.6986   3
   1   6  16 117.331 28.2562   2
  -1  -6 -16 139.125 17.5960   3
  -1   6 -17 146.340 29.9945   3
  -1   6 -18 98.3771 26.0156   3
  -1   6 -19 80.7584 27.7715   3
   1   7 -19 14.4239 14.3822   3
   1   7 -18-10.3299 11.0335   3
   1   7 -17 2.24104 7.73208   3
   1   7 -16 127.000 27.9839   3
   1   7 -15 19.6960 9.43461   3
   1   7 -14 406.278 45.0263   3
   1  -7 -14 410.692 19.2418   3
   1   7 -13 24.9170 9.13366   3
   1  -7 -13 22.6383 4.36793   3
   1  -7 -13 35.5044 6.65106   2
  -1   7  13 22.5078 11.5051   2
   1   7 -12 332.816 37.5551   3
   1  -7 -12 339.952 19.3647   2
   1  -7 -12 280.810 10.4726   3
  -1   7  12 384.771 27.4278   2
   1   7 -11 89.1511 20.0745   3
  -1   7  11 74.6648 13.1830   2
  -1   7  10 25.0640 8.76860   2
   1   7 -10 20.5866 9.74992   3
   1   7  -9 10.9133 7.31230   3
  -1   7   9 22.6569 8.60915   2
  -1   7   8 8.25251 6.45541   2
   1   7  -8 0.91782 5.41309   3
   1   7  -8-4.00925 8.20163   1
  -1  -7   7 116.725 18.2299   3
   1   7  -7 123.430 18.2039   3
   1   7  -7 126.183 18.7975   1
  -1   7   7 120.903 12.8336   2
   1   7  -6 257.603 24.8970   1
  -1  -7   6 253.826 24.5567   3
  -1   7   6 236.098 15.1958   2
   1   7  -6 219.249 24.3306   3
  -1   7   5 1.19379 3.47376   2
  -1  -7   5 18.7794 6.91259   3
   1   7  -5 4.25348 5.72923   3
   1   7  -5-1.83259 6.12891   1
  -1   7   5 6.26952 4.39395   1
   1   7  -4 669.312 38.0367   3
  -1  -7   4 675.356 38.1291   3
   1   7  -4 697.729 39.5690   1
  -1   7   4 763.096 36.4252   1
  -1   7   4 638.093 27.8697   2
  -1   7   3 11.9897 4.67642   1
   1   7  -3 21.2701 7.71111   3
  -1  -7   3 28.2298 7.02905   3
   1   7  -3 5.11005 3.13635   1
  -1   7   3 7.38980 2.85544   3
   1   7  -2 2589.53 74.4939   3
  -1   7   2 2452.92 57.5420   3
   1   7  -2 3221.28 86.6542   1
  -1  -7   2 2562.28 74.3794   3
  -1   7   2 1859.71 79.2095   1
  -1   7   1 20.6116 6.98355   1
   1   7  -1 61.2403 12.8183   3
  -1   7   1 61.1854 11.7910   3
  -1  -7   1 64.0029 11.0358   3
  -1   7   0 1928.29 57.0954   3
   1   7   0 1745.69 64.9105   1
  -1  -7   0 1837.93 54.9000   3
   1   7   0 1966.05 55.5791   3
  -1   7   0 2086.85 68.9886   1
   1  -7   1 75.8648 13.5879   1
  -1   7  -1 79.7078 14.0904   1
   1   7   1 109.210 10.1773   3
   1   7   1 99.2570 12.6589   1
   1   7   1 94.1516 12.5101   2
  -1   7  -1 94.4283 13.6742   3
  -1  -7  -1 102.031 11.0090   3
   1  -7   2 814.310 43.8853   1
  -1   7  -2 543.224 37.2102   1
   1   7   2 791.334 26.0428   3
  -1  -7  -2 731.541 26.1338   3
   1   7   2 572.811 34.2311   1
  -1   7  -2 744.146 36.9407   3
   1   7   2 633.036 32.9633   2
  -1   7  -3 11.5019 4.94311   3
   1   7   3 10.0819 3.79185   2
   1   7   3 12.1183 4.81389   1
  -1  -7  -3 6.33220 1.35290   3
   1  -7   3 8.67615 3.48979   1
   1   7   3 9.00981 3.28561   3
   1   7   4 101.906 12.2145   2
  -1   7  -4 112.451 15.5730   3
   1  -7   4 89.2668 15.9395   1
   1   7   4 95.5559 13.1605   1
  -1  -7  -4 95.9730 6.43956   3
  -1   7  -5 2.84533 5.22256   3
   1   7   5-4.14213 4.30954   1
   1  -7   5 1.43432 3.66539   1
   1   7   5-3.20980 2.31333   2
  -1   7  -6 34.2503 10.2765   3
   1   7   6 35.1243 7.37966   1
   1  -7   6 27.5282 10.0093   1
   1   7   6 45.8340 9.53521   2
  -1   7  -7-3.93935 9.59446   3
   1   7   7 7.79919 6.28876   2
   1  -7   7 5.59895 8.21490   1
   1   7   7 6.17077 4.35829   1
  -1   7  -8 290.948 30.9224   3
   1   7   8 294.642 20.4705   1
  -1  -7  -8 336.292 22.1869   2
   1  -7   8 302.850 30.0743   1
   1   7   8 326.507 26.8236   2
   1   7   9 13.9862 4.16496   1
   1   7   9 21.5091 8.78332   2
  -1   7  -9 17.8045 7.46840   3
   1  -7   9 12.8632 7.63450   1
  -1  -7  -9 14.2974 3.16599   3
  -1  -7  -9 1.94888 1.83743   2
  -1   7 -10 242.739 30.4019   3
   1   7  10 252.651 17.1763   1
   1   7  10 233.064 26.0187   2
  -1  -7 -10 235.348 12.8930   3
  -1  -7 -10 245.212 20.7003   2
  -1  -7 -11 12.5802 4.58354   2
  -1  -7 -11 8.36299 3.36353   3
   1   7  11 9.35036 6.49168   2
  -1   7 -11 8.09643 12.8779   3
   1   7  12 220.292 28.9597   2
  -1   7 -12 292.788 35.6296   3
  -1  -7 -12 312.983 18.1876   3
  -1  -7 -12 325.353 22.8972   2
  -1  -7 -13 8.19341 4.21347   3
  -1   7 -13 7.87283 4.32360   3
   1   7  13 15.7606 6.37159   2
  -1  -7 -13 7.45140 5.68074   2
  -1  -7 -14 87.4948 10.4141   3
   1   7  14 60.5902 16.5716   2
  -1   7 -14 76.2927 22.2410   3
  -1   7 -15 18.2177 7.15908   3
   1   7  15 29.3747 15.2037   2
  -1   7 -16 8.56338 5.39418   3
   1   7  16-1.39356 5.74736   2
  -1   7 -17 1.15038 10.8970   3
  -1   7 -18 63.8726 26.2734   3
   1   8 -18 225.593 37.8747   3
   1   8 -17 135.196 30.7287   3
   1   8 -16 255.349 38.3017   3
   1   8 -15 62.3791 21.2806   3
   1   8 -14 86.1745 24.0886   3
   1   8 -13 22.0454 11.4752   3
  -1   8  13 25.9805 9.30674   2
  -1   8  12 10.5832 6.63423   2
   1   8 -12 8.72239 9.62442   3
   1   8 -11 0.99924 3.66568   3
  -1   8  11-7.27689 4.37774   2
   1   8 -10 28.1006 11.7623   3
  -1   8  10 25.5033 9.33907   2
   1   8  -9 175.481 25.7857   3
  -1   8   9 160.164 17.7824   2
  -1   8   8 145.754 15.2561   2
   1   8  -8 119.086 20.2349   3
  -1   8   7 272.054 18.4550   2
   1   8  -7 195.215 23.6806   3
   1   8  -6 324.029 29.0372   3
  -1   8   6 335.337 20.1315   2
  -1  -8   6 344.406 30.3743   3
  -1   8   5 263.893 18.1099   2
   1   8  -5 293.112 28.0562   3
  -1   8   5 288.157 24.2704   1
  -1  -8   5 275.956 25.6400   3
  -1   8   4 179.052 15.3129   2
  -1   8   4 188.152 20.2552   1
  -1  -8   4 158.936 18.6426   3
   1   8  -4 231.908 23.6796   1
   1   8  -4 178.377 20.0511   3
  -1   8   3 9.78972 3.68906   2
  -1   8   3 4.86137 3.69481   1
   1   8  -3 11.4121 5.52628   3
   1   8  -3 11.8821 5.19533   1
  -1  -8   3 2.48382 3.74467   3
  -1   8   3 7.74926 2.99663   3
   1   8  -2 0.76096 3.37690   1
  -1   8   2 0.69549 1.91527   3
  -1   8   2-0.38438 4.08819   1
   1   8  -2 3.45674 4.93660   3
  -1  -8   2 1.44729 4.56507   3
  -1   8   1 0.86974 4.12923   3
   1   8  -1 1.92858 1.95756   3
  -1   8   1-1.80502 4.16167   1
  -1  -8   1 12.8119 8.11986   3
   1   8  -1-2.12535 4.17683   1
  -1   8   0 46.3081 9.46412   1
   1   8   0 29.4220 7.65642   1
  -1  -8   0 33.1542 6.60034   3
  -1   8   0 32.5308 6.91286   3
   1   8   0 40.0031 6.52191   3
  -1  -8  -1 74.1690 9.31949   3
   1   8   1 64.0280 8.06346   3
  -1   8  -1 78.9811 11.4778   3
  -1   8  -1 62.5967 11.7076   1
   1   8   1 81.2069 12.6308   1
   1   8   1 63.0519 10.9237   2
   1   8   2 157.650 11.7427   3
   1   8   2 123.497 16.1205   2
   1   8   2 148.443 17.1245   1
  -1  -8  -2 145.514 11.9017   3
  -1   8  -2 139.876 16.8503   3
  -1   8  -3 297.176 26.0958   3
   1   8   3 311.463 24.6876   1
   1   8   3 334.913 23.5918   2
  -1  -8  -3 305.737 15.8453   3
   1   8   3 314.721 14.9492   3
   1   8   4 324.451 22.8059   2
  -1  -8  -4 264.287 12.5319   3
  -1   8  -4 291.216 26.4539   3
   1   8   4 367.594 25.4945   1
  -1   8  -5 279.151 27.0192   3
   1   8   5 242.473 20.0548   2
   1   8   5 259.742 21.1873   1
   1   8   6 112.368 13.9776   2
   1   8   6 97.8332 12.3626   1
  -1   8  -6 81.5628 13.3283   3
   1   8   7 189.012 18.9221   2
   1   8   7 183.829 17.5695   1
  -1   8  -7 176.872 23.4607   3
  -1   8  -8 74.6640 16.3622   3
   1   8   8 80.9493 14.4315   2
   1   8   8 98.1577 12.4812   1
  -1   8  -9 43.5412 12.1118   3
   1   8   9 25.5941 12.6165   2
   1   8   9 38.2963 7.80763   1
   1   8  10 84.9477 16.2055   2
  -1   8 -10 71.1924 18.1812   3
   1   8  10 90.0581 11.6357   1
  -1   8 -11 17.9243 10.0439   3
   1   8  11 41.2425 11.3847   2
   1   8  11 20.5254 6.34255   1
  -1  -8 -11 4.92710 3.91442   2
  -1   8 -12 202.383 31.7995   3
   1   8  12 213.060 26.9828   2
  -1   8 -13 80.0475 20.8877   3
   1   8  13 104.831 23.3909   2
  -1   8 -14 338.387 43.8140   3
   1   8  14 356.285 38.1945   2
   1   8  15 114.817 14.9444   2
  -1   8 -15 124.406 25.9536   3
  -1   8 -16 208.297 35.8968   3
  -1   8 -17 64.7196 20.3547   3
   1   9 -17-5.72404 13.9662   3
   1   9 -16 37.4320 15.0219   3
   1   9 -15 107.537 27.6024   3
   1   9 -14 8.17423 11.9175   3
   1   9 -13 233.802 33.7653   3
   1   9 -12-7.71012 9.89773   3
  -1   9  12 12.6135 8.21197   2
   1   9 -11 60.7799 15.5090   3
  -1   9  11 74.4833 14.0093   2
  -1   9  10 6.45356 6.66865   2
   1   9 -10 1.70722 7.71559   3
   1   9  -9 9.14553 4.76029   3
  -1   9   9 7.59161 5.78644   2
   1   9  -8 42.9082 9.65795   3
  -1   9   8 54.7089 8.36781   2
  -1   9   7 23.8694 7.93244   2
   1   9  -7 16.8551 7.77826   3
   1   9  -6 17.0502 8.59220   3
  -1   9   6 36.4024 7.83694   2
  -1   9   5 811.169 35.6308   2
   1   9  -5 765.716 46.3423   3
   1   9  -4 20.3452 8.56643   3
  -1  -9   4 38.0905 10.7760   3
  -1   9   4 12.7762 7.37759   1
  -1   9   4 19.9611 6.63798   2
  -1  -9   3 1346.98 57.2950   3
  -1   9   3 1169.60 47.6067   2
  -1   9   3 1136.16 32.6301   3
  -1   9   3 1429.26 60.2534   1
   1   9  -3 1200.93 54.1107   3
   1   9  -2 61.5547 12.5970   3
  -1   9   2 67.4741 11.7813   1
  -1   9   2 66.6237 8.82744   3
  -1  -9   2 86.4060 14.1029   3
   1   9  -1 1543.91 57.3340   3
  -1   9   1 1603.95 51.7758   3
  -1   9   1 1813.50 71.3933   1
  -1  -9   1 1638.12 59.2902   3
   1   9   0 196.995 17.7147   3
  -1   9   0 205.389 19.0533   3
  -1  -9   0 204.939 18.6387   3
   1   9   0 152.929 21.2254   1
  -1   9   0 181.061 22.1036   1
   1   9   1 962.822 36.3373   3
  -1  -9  -1 895.040 37.1885   3
  -1   9  -1 907.491 42.6073   3
   1   9   1 912.829 45.0898   2
   1   9   1 707.716 43.1236   1
  -1   9  -2 40.5100 10.4932   3
   1   9   2 46.7983 6.58194   3
   1   9   2 47.4879 10.2641   1
   1   9   2 44.8825 9.98062   2
   1   9   3 266.238 22.9772   2
  -1   9  -3 249.013 25.1230   3
   1   9   3 249.798 23.1824   1
   1   9   3 236.494 13.9353   3
  -1   9  -4 7.31025 3.87071   3
   1   9   4 10.2653 5.20488   2
   1   9   4 1.72627 5.49612   1
   1   9   5 16.3233 5.47136   1
  -1   9  -5 3.93742 6.58032   3
   1   9   5 17.1074 5.87415   2
  -1   9  -6 32.3645 10.0128   3
   1   9   6 27.1341 7.89325   1
   1   9   6 25.1651 7.47131   2
   1   9   7 149.079 17.1842   1
   1   9   7 189.256 19.3830   2
  -1   9  -7 147.565 20.8410   3
   1   9   8 12.3529 10.1043   2
  -1   9  -8 11.2878 7.00744   3
   1   9   8 17.0839 3.85459   1
   1   9   9 184.181 17.1476   1
   1   9   9 135.885 20.6851   2
  -1   9  -9 164.874 26.2481   3
   1   9  10 9.02983 11.2220   2
  -1   9 -10 6.08063 7.93546   3
   1   9  10-2.18990 6.40581   1
   1   9  11 278.899 32.3147   2
  -1   9 -11 235.911 32.2119   3
  -1   9 -12-2.44312 6.22841   3
   1   9  12 6.06081 11.1349   2
   1   9  13 88.3964 21.0647   2
  -1   9 -13 95.2968 26.1962   3
  -1   9 -14 16.2364 6.69295   3
   1   9  14 12.2622 10.7403   2
  -1   9 -15 22.0770 20.4260   3
  -1   9 -16 3.68493 15.7868   3
   1  10 -16 63.3068 18.2709   3
   1  10 -15 24.1671 14.3269   3
   1  10 -14 22.2328 11.1628   3
   1  10 -13 21.1387 15.5744   3
   1  10 -12 20.3840 18.3569   3
   1  10 -11-0.09222 8.27080   3
  -1  10  11 3.08308 4.59205   2
  -1  10  10 153.044 20.5087   2
   1  10 -10 104.858 23.2164   3
   1  10  -9 81.3319 18.9164   3
  -1  10   9 78.4012 13.0010   2
  -1  10   8 275.157 21.6141   2
   1  10  -8 298.820 33.0149   3
  -1  10   7 280.588 20.1208   2
   1  10  -7 267.018 30.7193   3
   1  10  -6 351.760 33.3999   3
  -1  10   6 342.758 23.4450   2
   1  10  -5 173.049 22.9389   3
  -1  10   5 195.045 18.2688   2
   1  10  -4 72.1319 13.8472   3
  -1  10   4 75.7592 11.1916   2
   1  10  -3 72.9884 13.7924   3
  -1  10   3 76.5050 13.0174   2
  -1  10   3 74.1990 7.27910   3
  -1  10   2 8.33029 2.61368   3
   1  10  -2-0.44204 5.68858   3
  -1  10   1-3.26597 1.84942   3
   1  10  -1 2.90412 4.16219   3
  -1  10   0 1.52392 4.35617   3
   1  10   0 14.3007 8.39571   3
   1  10   1 43.9018 8.24851   3
   1  10   1 36.4633 10.5010   2
  -1  10  -1 40.6874 9.59624   3
   1  10   2 154.518 19.1159   2
   1  10   2 155.209 13.1027   3
  -1  10  -2 168.256 19.4613   3
  -1  10  -3 263.559 25.8814   3
   1  10   3 250.282 22.7445   2
   1  10   3 244.567 14.3507   3
   1  10   4 478.887 32.1977   2
   1  10   4 429.958 32.3878   1
  -1  10  -4 459.893 36.2259   3
   1  10   5 159.608 17.2478   2
  -1  10  -5 155.804 22.4589   3
   1  10   5 209.856 20.4480   1
   1  10   6 223.775 21.4580   2
  -1  10  -6 253.331 28.0926   3
   1  10   6 252.327 23.2072   1
   1  10   7 72.4227 11.8184   2
   1  10   7 88.7224 13.1054   1
  -1  10  -7 73.5031 17.2034   3
  -1  10  -8 128.744 23.1806   3
   1  10   8 112.714 17.6720   2
   1  10   8 146.514 17.1179   1
   1  10   9 10.2379 6.18208   2
  -1  10  -9 2.94602 6.80794   3
   1  10   9 11.3614 5.08084   1
   1  10  10-3.79499 3.92033   2
  -1  10 -10 4.84458 9.50518   3
   1  10  11 45.4097 17.2325   2
  -1  10 -11 26.2406 9.55524   3
   1  10  12 65.0154 19.9634   2
  -1  10 -12 76.2883 21.6420   3
  -1  10 -13 49.5040 18.3893   3
  -1  10 -14 90.9429 28.1856   3
  -1  10 -15 146.940 34.0768   3
   1  11 -15 26.3873 15.6879   3
   1  11 -14 199.033 40.0471   3
   1  11 -13 24.3396 15.7290   3
   1  11 -12 218.687 35.4836   3
   1  11 -11 6.66602 13.0465   3
   1  11 -10 56.6719 18.5449   3
  -1  11  10 75.5054 16.5983   2
   1  11  -9 15.7679 8.85516   3
  -1  11   9 14.1994 7.59684   2
   1  11  -8 5.85575 3.52598   3
  -1  11   8-1.72075 6.50358   2
  -1  11   7 31.0285 8.31907   2
   1  11  -7 27.0973 11.0947   3
   1  11  -6 119.623 21.1984   3
  -1  11   6 110.889 15.5644   2
  -1  11   5 0.03874 4.80929   2
   1  11  -5 3.89555 5.13575   3
   1  11  -4 280.916 27.8338   3
  -1  11   4 306.929 24.9396   2
   1  11  -3-2.54376 6.39811   3
  -1  11   3-1.85820 2.29139   3
  -1  11   3 2.24515 5.63475   2
   1  11  -2 649.356 40.6167   3
  -1  11   2 723.456 30.9576   3
   1  11  -1 5.86377 6.56709   3
  -1  11   1 6.43706 5.64329   3
  -1  11   0 397.941 28.0256   3
   1  11   0 426.450 35.2769   2
   1  11   0 425.506 28.3679   3
  -1  11  -1 11.5632 6.11755   3
   1  11   1 12.6499 4.42099   3
   1  11   1 15.0978 3.05638   2
   1  11   2 167.699 14.2860   3
  -1  11  -2 167.141 20.4628   3
   1  11   2 169.951 21.3714   2
  -1  11  -3 3.77197 3.78232   3
   1  11   3-1.03016 2.79157   3
   1  11   3 2.44908 3.61809   2
   1  11   4 16.9505 6.11786   2
  -1  11  -4 22.5259 8.28007   3
   1  11   5 12.7277 3.62900   2
  -1  11  -5 21.3993 13.7349   3
  -1  11  -6 109.633 21.2229   3
   1  11   6 97.8529 14.1378   2
   1  11   7 14.5205 8.18912   2
  -1  11  -7 14.2180 4.14774   3
   1  11   8 412.702 32.5735   2
  -1  11  -8 341.397 37.2420   3
   1  11   9-2.67067 6.05477   2
  -1  11  -9 3.50452 5.20665   3
  -1  11 -10 298.985 39.6495   3
   1  11  10 313.621 32.1209   2
   1  11  11 27.6640 4.33039   2
  -1  11 -11 37.8186 17.3827   3
  -1  11 -12 116.644 24.0825   3
  -1  11 -13 1.36508 8.16310   3
  -1  11 -14 18.1539 9.03219   3
  -1  11 -15-12.7876 8.47489   3
   1  12 -14 17.7324 6.26100   3
   1  12 -13 3.65075 5.84993   3
   1  12 -12 20.7223 9.52654   3
   1  12 -11 64.8772 18.9807   3
   1  12 -10 8.35767 9.35184   3
   1  12  -9 155.615 25.6728   3
  -1  12   8 96.6033 14.2307   2
   1  12  -8 83.6556 18.3663   3
   1  12  -7 253.742 31.9901   3
  -1  12   7 329.693 25.4508   2
  -1  12   6 83.4789 12.9911   2
   1  12  -6 77.8779 18.3710   3
   1  12  -5 188.346 24.7483   3
  -1  12   5 209.508 22.5250   2
  -1  12   4 19.7496 8.13719   2
   1  12  -4 13.7901 4.16703   3
  -1  12   3 10.9083 4.35006   3
  -1  12   3 3.48352 3.13060   2
   1  12  -3 4.02223 4.59135   3
  -1  12   2 12.1318 5.36622   3
  -1  12   2 14.8630 9.23278   2
   1  12  -2 10.8293 3.51762   3
   1  12  -1 54.4408 11.4101   3
  -1  12   1 81.2781 12.6324   3
   1  12   0 4.38637 3.34440   3
  -1  12   0 0.87917 3.68893   3
   1  12   0 0.30213 7.57995   2
   1  12   1 217.415 18.8181   3
  -1  12  -1 173.782 21.2098   3
   1  12   1 191.750 24.1305   2
   1  12   2 20.3769 8.50482   2
   1  12   2 25.3933 6.37809   3
  -1  12  -2 24.4439 6.45716   3
  -1  12  -3 284.777 28.2532   3
   1  12   3 282.034 29.0391   2
   1  12   3 229.531 15.7294   3
  -1  12  -4 73.2662 16.7349   3
   1  12   4 79.1570 15.0578   2
  -1  12  -5 342.121 34.9717   3
   1  12   5 363.855 30.2248   2
   1  12   6 18.2271 8.83833   2
  -1  12  -6 19.9890 9.47842   3
  -1  12  -7 126.093 21.2895   3
   1  12   7 129.469 17.6340   2
  -1  12  -8-21.9923 9.92434   3
   1  12   8 0.74415 6.57358   2
  -1  12  -9 30.7929 16.5895   3
   1  12   9 9.25130 9.22041   2
   1  12  10 30.6254 12.0859   2
  -1  12 -10 22.2091 12.6844   3
  -1  12 -11 8.74214 10.8329   3
  -1  12 -12 71.9790 16.6908   3
  -1  12 -13 62.1865 18.1402   3
  -1  12 -14 83.5016 33.8203   3
   1  13 -13 209.392 41.4056   3
   1  13 -12 81.8867 24.8137   3
   1  13 -11 190.391 31.8425   3
   1  13 -10 32.7572 10.6632   3
   1  13  -9 55.7041 17.0328   3
   1  13  -8 28.5197 8.55279   3
  -1  13   7-1.23364 7.55271   2
   1  13  -7 10.1330 6.16896   3
  -1  13   6 12.0856 3.19237   2
   1  13  -6 12.4802 6.02893   3
  -1  13   5 17.9961 4.40865   2
   1  13  -5 26.8116 10.4182   3
  -1  13   4 6.52428 3.55458   2
   1  13  -4 11.1482 8.51830   3
   1  13  -3 194.674 24.4041   3
  -1  13   3 157.905 20.2445   2
   1  13  -2-4.41708 9.14976   3
  -1  13   2 3.27670 5.68436   2
   1  13  -1 262.852 32.0128   2
  -1  13   1 337.147 24.9243   3
   1  13  -1 316.233 27.5161   3
  -1  13   0 1.78597 3.31986   3
   1  13   0-1.40825 7.71382   2
   1  13   0 1.69000 4.22274   3
   1  13   1 157.524 16.5052   3
   1  13   1 104.206 21.0394   2
  -1  13  -1 129.319 18.6077   3
  -1  13  -2 9.23539 5.78045   3
   1  13   2-0.56891 4.81334   2
   1  13   3 7.52929 8.34420   2
  -1  13  -3 5.34232 4.82364   3
   1  13   4 47.0307 13.5910   2
  -1  13  -4 25.4147 7.03108   3
   1  13   5 66.0675 14.5801   2
  -1  13  -5 45.0887 12.4219   3
   1  13   6 32.0163 10.6102   2
  -1  13  -6 38.8367 12.5716   3
  -1  13  -7 169.048 28.5045   3
   1  13   7 185.217 22.8037   2
  -1  13  -8 57.7699 20.5486   3
   1  13   8 60.7586 13.0572   2
  -1  13  -9 270.354 37.6131   3
  -1  13 -10 61.1692 16.5829   3
  -1  13 -11 181.391 34.7049   3
  -1  13 -12 29.7141 15.8456   3
   1  14 -12 21.9405 10.1262   3
   1  14 -11 8.15773 6.91035   3
   1  14 -10 160.811 31.9590   3
   1  14  -9-0.18032 9.41253   3
   1  14  -8 268.697 38.3141   3
   1  14  -7 17.0754 14.8486   3
   1  14  -6 343.100 36.5610   3
  -1  14   5-1.95514 4.73635   2
   1  14  -5 4.62157 7.69899   3
  -1  14   4 140.294 20.0449   2
   1  14  -4 118.223 20.5226   3
   1  14  -3 5.63827 6.04847   3
  -1  14   3 4.78734 4.86969   2
  -1  14   2-0.50849 8.35976   2
   1  14  -2-0.20855 6.35877   3
  -1  14   1 40.6123 15.5003   2
   1  14  -1 47.1050 15.8011   2
   1  14   0 94.5931 18.8536   2
   1  14   1 35.8413 4.93395   2
   1  14   2 210.375 24.7213   2
  -1  14  -2 230.872 26.7107   3
  -1  14  -3 42.5842 11.2130   3
   1  14   3 55.6334 12.9684   2
   1  14   4 270.156 30.0697   2
  -1  14  -4 338.329 36.8345   3
  -1  14  -5-0.10325 12.7004   3
   1  14   5 15.6161 8.75620   2
  -1  14  -6 293.542 36.6258   3
   1  14   6 256.756 27.4891   2
  -1  14  -7 42.5099 17.1959   3
  -1  14  -8 137.043 28.8049   3
  -1  14  -9-2.11706 4.77459   3
  -1  14 -10-7.49955 8.21380   3
  -1  14 -11-6.45509 16.1854   3
   1  15 -11 46.2744 13.6956   3
   1  15 -10 125.905 30.0724   3
   1  15  -9 39.0701 15.0363   3
   1  15  -8 32.6313 8.81998   3
   1  15  -7-7.42374 9.78014   3
   1  15  -6-11.0517 5.63971   3
   1  15  -5 8.47454 4.92826   3
  -1  15   3 23.8867 13.7265   2
  -1  15   2 183.481 26.2520   2
   1  15  -2 163.106 28.6068   2
   1  15  -1 12.5083 6.22625   2
  -1  15   1 13.6629 9.20718   2
  -1  15   0 135.203 27.0754   2
   1  15   0 118.940 20.5721   2
   1  15   1 6.86474 4.77562   2
   1  15   2 11.5402 8.09744   2
   1  15   3-3.65312 8.82910   2
   1  15   4-29.4937 10.1269   2
  -1  15  -5 39.8854 19.9377   3
   1  15   5 27.3384 13.5766   2
  -1  15  -6 72.8683 16.7929   3
  -1  15  -7 23.6765 7.44271   3
  -1  15  -8 88.1558 22.8816   3
  -1  15  -9 46.7121 20.7349   3
  -1  15 -10 102.888 28.5804   3
   1  16  -9-50.2190 16.3719   3
   1  16  -3 32.2247 11.4308   2
   1  16  -2-2.20572 10.5974   2
  -1  16   1 0.72310 11.6336   2
   1  16  -1-3.48961 16.3339   2
  -1  16   0 13.9173 11.2827   2
   1  16   0-0.30572 6.20800   2
   1  16   1 72.7673 18.1427   2
  -1  16  -1 80.4767 17.5491   2
   1  16   2-1.51566 8.32495   2
   1  16   3 225.368 31.2851   2
   1  17  -2 39.9104 6.99525   2
   1  17  -1 45.6421 14.5811   2
   1  17   0 43.2555 18.6734   2
  -1  17  -1 23.2974 10.0832   2
   1  17   1 22.7861 16.4668   2
  -1  17  -2 23.7610 16.1794   2
   2   0 -23 7.63578 9.02791   3
   2   0 -22 28.1100 19.7792   3
   2   0 -21-8.48372 16.4333   3
   2   0 -20-1.23368 9.17704   3
   2   0 -19 9.85716 13.7644   3
   2   0 -18 20.6459 5.65627   3
   2   0 -17 2.90359 6.08439   3
   2   0 -16 69.5369 16.5675   2
   2   0 -16 132.696 21.9723   3
   2   0 -15 6.16892 14.9070   2
   2   0 -15 2.52086 5.94086   3
   2   0 -14 216.281 28.7799   2
   2   0 -14 275.246 28.2231   3
   2   0 -13 0.84361 10.1426   2
   2   0 -13-0.86499 3.69921   3
   2   0 -12 68.5369 13.6758   3
  -2   0  12 98.3367 16.9237   3
   2   0 -12 60.8159 5.21372   2
   2   0 -11 1.16253 5.21637   3
   2   0 -11-1.48111 5.17980   2
  -2   0  11-1.21591 3.28658   3
  -2   0  10 97.8974 14.5107   3
   2   0 -10 95.3931 14.4031   3
   2   0 -10 37.0568 9.81927   2
   2   0  -9-1.35849 1.84927   1
  -2   0   9 0.70223 3.88608   3
   2   0  -9-0.71192 3.85137   3
   2   0  -9-0.70056 3.63784   2
  -2   0   8 472.589 27.4538   3
   2   0  -8 540.826 18.7995   1
   2   0  -8 480.479 28.3305   3
   2   0  -7-2.23722 3.62990   3
  -2   0   7 1.80305 2.76916   3
   2   0  -6 697.345 29.9247   3
  -2   0   6 619.914 28.4734   3
   2   0  -5-1.54317 2.62771   3
  -2   0   5-0.21094 2.52293   3
  -2   0   4 2439.61 58.6073   3
   2   0  -4 2411.01 58.0523   3
  -2   0   3-0.41393 1.96483   3
   2   0  -3-2.27808 3.13760   3
  -2   0   2 4130.96 81.2435   3
  -2   0   2 4248.61 76.2509   2
   2   0  -2 4134.96 81.4366   3
   2   0  -2 3868.66 75.6386   2
  -2   0   1-0.40900 1.40448   3
  -2   0   1 2.36573 1.80933   2
   2   0  -1 1.05547 1.37559   2
   2   0  -1-0.18042 1.86762   3
  -2   0   0 2193.66 53.3919   2
   2   0   0 2875.70 57.6968   2
   2   0   1-0.89738 3.97263   2
  -2   0  -1-0.39746 3.17772   2
  -2   0  -2 161.486 15.9026   2
   2   0   2 154.888 14.0846   2
   2   0   3 5.23081 3.87738   2
  -2   0  -3-1.77682 3.20539   2
   2   0   4 144.512 16.5935   2
  -2   0  -4 149.343 15.3322   2
  -2   0  -5-4.12948 5.67763   2
   2   0   5 7.56700 8.95981   2
   2   0   6 281.098 25.5991   2
  -2   0  -6 279.454 25.1912   2
  -2   0  -7 23.6733 11.4462   2
   2   0   7 7.85777 9.88997   2
  -2   0  -8 132.590 20.2177   2
   2   0   8 151.608 22.5314   2
  -2   0  -9 4.87981 6.96449   2
   2   0   9 5.41206 9.61487   2
  -2   0 -10 317.099 29.5790   3
  -2   0 -10 378.905 34.7116   2
   2   0  10 346.958 36.8169   2
  -2   0 -11 6.87760 10.2434   2
  -2   0 -11 0.04466 4.16184   3
  -2   0 -12 211.294 26.0268   3
   2   0  12 234.367 19.5194   1
  -2   0 -12 199.144 25.9055   2
  -2   0 -13-0.28451 5.70965   3
   2   0  13-5.66740 5.48952   1
   2   0  14 1.26448 3.74328   1
  -2   0 -14 1.42072 4.97329   3
   2   0  15 3.82732 7.17201   1
  -2   0 -15-7.57175 13.7713   3
   2   0  16 12.3690 2.94091   1
  -2   0 -16 20.8404 12.5056   3
  -2   0 -17 5.31463 13.8380   3
  -2   0 -18 103.061 22.0019   3
  -2   0 -19 11.0044 8.15983   3
  -2   0 -20 75.9481 15.7679   3
  -2   0 -21 5.19513 12.7045   3
  -2   0 -22 28.7620 13.2526   3
   2  -1 -23 4.31084 4.87453   3
   2   1 -23 47.8089 20.3792   3
   2  -1 -22 96.0009 26.2959   3
   2   1 -22 87.9553 22.3184   3
   2   1 -21 112.357 22.8203   3
   2  -1 -21 145.845 26.5355   3
   2  -1 -20 194.482 31.7946   3
   2   1 -20 214.947 35.5616   3
   2  -1 -19 262.191 34.1018   3
   2   1 -19 214.093 33.0188   3
   2   1 -18 307.420 37.6124   3
   2  -1 -18 334.861 36.4021   3
   2  -1 -17 49.1446 19.7547   2
   2  -1 -17 93.1926 19.0867   3
   2   1 -17 100.814 21.2461   3
   2  -1 -16 43.8650 16.9200   2
   2   1 -16 40.9038 12.3214   3
   2  -1 -16 52.4022 11.9288   3
   2   1 -15 10.1389 8.73771   2
   2   1 -15 6.62902 7.21113   3
   2  -1 -15 2.40830 7.79879   3
   2  -1 -15 22.1655 7.98321   2
   2  -1 -14 4.91118 13.9693   2
   2   1 -14 5.29236 9.20386   3
   2   1 -14 10.5526 8.10127   2
   2  -1 -14 3.66559 7.08778   3
   2  -1 -13 4.25683 7.73636   3
   2   1 -13-0.92058 6.93247   3
   2   1 -13-3.84888 13.3955   2
   2  -1 -13-2.28737 7.59032   2
   2  -1 -12 55.9488 14.6450   2
   2  -1 -12 46.1196 11.5910   3
   2   1 -12-1.64976 11.3105   2
  -2  -1  12 58.7187 10.0401   3
   2   1 -12 58.4174 15.2853   3
   2   1 -11 46.6981 14.4799   2
  -2  -1  11 258.374 24.2010   3
   2  -1 -11 240.779 22.2720   3
  -2   1  11 228.671 21.3353   3
   2  -1 -11 242.263 22.8147   2
   2   1 -11 236.198 24.5060   3
   2  -1 -10 138.997 16.0920   3
   2  -1 -10 118.391 15.9177   2
  -2  -1  10 147.437 17.3528   3
  -2   1  10 133.468 15.5171   3
   2   1 -10 144.207 18.4448   3
   2   1 -10 161.416 12.8586   1
  -2   1   9 646.551 32.9618   3
   2   1  -9 674.552 38.1223   3
   2  -1  -9 644.142 35.4767   2
   2  -1  -9 676.730 34.9334   3
   2   1  -9 775.336 27.3379   1
  -2  -1   9 663.556 35.8633   3
   2  -1  -8 445.553 25.6010   3
   2   1  -8 430.497 19.6231   1
  -2  -1   8 407.440 25.8668   3
   2   1  -8 415.855 27.7881   3
  -2   1   8 385.492 23.3173   3
   2  -1  -8 348.784 22.7913   2
  -2   1   7 222.737 16.0767   3
   2  -1  -7 243.631 16.8116   3
   2   1  -7 236.799 19.3445   3
  -2  -1   7 226.712 18.5600   3
  -2  -1   6 891.536 36.1623   3
   2  -1  -6 874.034 31.8271   3
  -2   1   6 840.097 31.3288   3
   2   1  -6 843.629 36.5930   3
  -2  -1   5 19.6805 4.95421   3
   2   1  -5 15.4473 4.50992   3
   2  -1  -5 10.5105 3.25587   3
  -2   1   5 13.7411 2.34445   3
  -2   1   4 210.226 12.2797   3
  -2  -1   4 201.764 14.0619   3
   2   1  -4 208.488 14.5628   3
   2  -1  -4 227.808 12.7532   3
  -2   1   3 24.3707 3.85226   3
   2  -1  -3 23.7816 4.11361   3
   2   1  -3 26.4973 4.77083   3
  -2  -1   3 26.2133 5.32740   3
  -2  -1   2 183.841 11.4045   3
   2  -1  -2 182.419 10.7223   3
   2   1  -2 195.771 11.8710   3
  -2   1   2 198.964 7.35909   2
   2   1  -2 172.967 10.6590   2
   2  -1  -2 199.943 8.68322   2
  -2   1   2 185.821 9.67853   3
   2   1  -1 84.4171 7.59846   2
  -2   1   1 107.829 8.18503   3
   2   1  -1 110.753 8.27823   3
  -2  -1   1 119.532 8.42107   3
  -2   1   1 133.510 8.80573   2
   2  -1  -1 134.920 9.02247   2
  -2  -1   1 103.889 7.35446   2
   2   1   0 674.426 22.6307   3
  -2  -1   0 659.049 22.0780   3
   2  -1   0 659.450 25.2149   2
  -2   1   0 657.300 24.5449   2
   2   1   0 671.760 22.1710   2
  -2  -1   0 664.274 21.8489   2
   2  -1   1 44.9828 7.79296   2
  -2  -1  -1 59.3530 6.32493   2
   2   1   1 52.1124 6.71089   2
  -2   1  -1 41.7481 6.78895   2
   2   1   2 380.327 21.2633   2
  -2  -1  -2 367.253 18.8431   2
   2  -1   2 330.148 21.4125   2
  -2   1  -2 361.222 21.6124   2
   2  -1   3 1434.44 51.4709   2
   2   1   3 1458.93 51.3862   2
  -2  -1  -3 1488.66 45.8676   2
  -2   1  -3 1400.98 50.1877   2
   2   1   4 8.64248 4.40841   2
  -2   1  -4 4.82194 3.21954   2
   2  -1   4 2.38770 4.58296   2
  -2  -1  -4 8.68916 5.04559   2
   2   1   5 244.901 22.1032   2
  -2   1  -5 198.462 21.1280   2
   2  -1   5 255.201 24.6183   2
  -2  -1  -5 274.201 22.7571   2
  -2  -1  -6 107.112 17.0258   2
   2  -1   6 121.207 19.8807   2
  -2   1  -6 91.9132 17.6175   2
   2   1   6 105.847 17.1544   2
  -2  -1  -7 0.67103 5.01619   2
   2   1   7 8.32689 7.98455   2
  -2   1  -7-2.86679 6.68838   2
   2  -1   7 3.44700 5.71400   2
  -2  -1  -8 87.9087 17.1131   2
   2   1   8 78.8857 18.3218   2
   2  -1   8 74.7382 15.4758   2
  -2   1  -8 76.3390 16.3651   2
   2   1   9 300.749 30.4850   2
  -2   1  -9 297.331 30.2316   2
  -2   1  -9 279.874 27.9230   3
  -2  -1  -9 317.609 29.1628   2
  -2  -1 -10 437.511 33.8302   3
   2   1  10 445.230 40.1620   2
  -2   1 -10 498.502 41.2581   2
  -2  -1 -10 530.084 40.3507   2
  -2   1 -10 444.976 37.2997   3
  -2  -1 -11 183.131 22.6630   3
   2  -1  11 198.581 18.4202   1
  -2   1 -11 208.891 28.0014   2
  -2   1 -11 183.977 23.6631   3
   2   1  11 189.047 26.8270   2
  -2  -1 -11 216.828 26.2828   2
   2   1  12 515.281 49.3867   2
  -2  -1 -12 563.391 41.3770   3
  -2  -1 -12 562.193 46.8120   2
   2  -1  12 542.019 31.5918   1
  -2   1 -12 476.435 40.8711   3
   2   1  13 546.886 29.0956   1
  -2   1 -13 489.795 43.0890   3
   2  -1  13 542.306 31.5316   1
  -2  -1 -13 471.746 40.1640   3
   2  -1  14 673.115 36.3763   1
  -2   1 -14 535.905 46.5865   3
  -2  -1 -14 574.573 45.8728   3
   2   1  14 654.112 30.1090   1
   2   1  15 498.721 25.9739   1
   2  -1  15 529.643 32.8015   1
  -2   1 -15 433.319 42.7865   3
  -2  -1 -15 436.545 41.0318   3
  -2  -1 -16 330.197 36.4084   3
   2   1  16 332.417 21.4717   1
   2  -1  16 392.180 28.8016   1
  -2   1 -16 304.751 37.6473   3
  -2  -1 -17 76.3827 16.4849   3
  -2   1 -17 80.2656 22.7385   3
  -2  -1 -18 24.9328 9.74891   3
  -2   1 -18 76.5360 20.0061   3
  -2   1 -19 12.9802 9.17097   3
  -2  -1 -19 39.0529 16.7991   3
  -2   1 -20 0.33941 11.9339   3
  -2  -1 -20-7.42965 8.09649   3
  -2  -1 -21-31.4712 13.3680   3
  -2   1 -21 1.08794 9.73126   3
  -2  -1 -22 10.9946 19.6488   3
   2  -2 -22 10.0876 12.5350   3
   2   2 -22 8.34727 8.53945   3
   2   2 -21 19.5187 13.7140   3
   2  -2 -21 11.9106 4.32330   3
   2  -2 -20-2.20832 3.94972   3
   2   2 -20 6.31204 11.5466   3
   2   2 -19 13.3372 10.2151   3
   2  -2 -19 14.3613 7.45787   3
   2  -2 -18 36.3658 12.2683   3
   2   2 -18 51.5101 18.6563   3
   2  -2 -17 144.273 28.2747   2
   2   2 -17 158.291 26.0208   3
   2  -2 -17 173.182 24.7691   3
   2  -2 -16 13.7608 12.1674   2
   2  -2 -16-2.91269 6.39572   3
   2   2 -16 3.05052 4.27919   3
   2  -2 -15 411.732 34.6636   3
   2  -2 -15 447.753 39.1249   2
   2   2 -15 417.895 40.5796   3
   2  -2 -14 7.13194 4.72055   2
   2   2 -14 5.37589 4.40185   3
   2   2 -14 17.6708 14.7230   2
   2  -2 -14 0.49274 3.79304   3
   2   2 -13 441.758 38.8895   3
   2  -2 -13 496.111 36.5163   2
   2  -2 -13 475.794 33.6846   3
   2  -2 -12 99.6621 15.4449   3
  -2  -2  12 96.2735 17.0912   3
   2   2 -12 97.1569 18.2826   3
   2   2 -12 52.1074 11.9488   2
   2  -2 -12 108.551 16.6131   2
  -2  -2  11 183.601 20.5012   3
   2   2 -11 213.420 16.3343   1
   2   2 -11 155.558 22.3314   3
   2  -2 -11 173.386 19.9862   2
   2  -2 -11 172.788 18.2292   3
   2  -2 -10 14.9631 7.11790   2
   2   2 -10-2.45490 5.50984   3
  -2  -2  10 2.11934 3.48818   3
  -2   2  10 0.58460 3.50747   3
   2  -2 -10 0.96595 2.57053   3
   2   2 -10-3.89253 4.50466   1
   2  -2  -9 11.8869 6.13897   3
   2   2  -9 15.1264 5.25846   1
   2   2  -9 22.9966 10.3420   3
   2  -2  -9 22.8392 6.38312   2
  -2   2   9 12.5673 3.96354   3
  -2  -2   9 19.0082 6.77535   3
   2   2  -8 26.5069 7.36509   3
   2   2  -8 20.1559 4.10595   1
   2  -2  -8 70.6366 9.99824   2
   2  -2  -8 27.1947 5.59961   3
  -2  -2   8 40.0003 9.55361   3
  -2   2   8 36.6461 6.33600   3
  -2   2   7 1050.65 35.9582   3
  -2  -2   7 1074.36 44.5275   3
   2   2  -7 970.639 36.5423   1
   2   2  -7 1089.57 46.5179   3
   2  -2  -7 1103.38 34.7160   2
   2  -2  -7 1090.61 36.6305   3
   2  -2  -6 23.2435 4.49113   2
   2  -2  -6 26.7047 5.14418   3
  -2   2   6 22.2509 4.90318   3
   2   2  -6 25.2290 4.92606   3
  -2  -2   6 33.9255 7.87700   3
  -2   2   5 188.733 11.5305   3
  -2  -2   5 173.153 14.7062   3
   2  -2  -5 198.351 11.7403   3
   2   2  -5 200.156 16.3218   3
  -2  -2   4 151.360 13.5600   3
  -2   2   4 151.539 9.41158   3
   2   2  -4 148.578 13.6022   3
   2  -2  -4 161.600 9.44716   3
  -2  -2   3 1332.43 41.1890   3
  -2   2   3 1316.72 32.0195   3
   2   2  -3 1352.04 41.3588   3
   2  -2  -3 1346.81 33.6038   3
  -2   2   2 7.37023 2.23514   3
  -2  -2   2 12.0200 3.33114   3
  -2   2   2 10.9782 2.88506   2
   2   2  -2 12.5672 4.54584   3
   2   2  -1 2934.04 65.6532   2
  -2  -2   1 2987.99 65.4181   3
   2   2  -1 3014.24 65.3340   3
   2  -2  -1 3037.33 68.2811   2
  -2   2   1 3020.49 64.0050   2
   2   2   0 3.92951 3.69530   3
   2  -2   0 21.7439 8.86817   2
  -2  -2   0-0.04036 2.49097   2
  -2  -2   0 1.56887 3.28253   3
  -2   2   0 26.8228 8.64275   2
   2   2   0-0.25889 1.78427   2
  -2   2  -1 2196.63 58.8318   2
  -2  -2  -1 2117.68 49.4043   3
  -2  -2  -1 2040.68 50.6399   2
   2  -2   1 2355.92 63.4350   2
   2   2   1 1997.18 51.1101   2
   2  -2   2 167.604 15.7956   2
   2   2   2 184.453 13.5487   2
  -2  -2  -2 159.309 11.8152   2
  -2   2  -2 161.290 15.7579   2
  -2  -2  -3 178.694 12.7388   2
   2   2   3 154.413 14.0634   2
   2  -2   3 162.640 18.5074   2
  -2   2  -3 168.455 16.2086   2
  -2   2  -4 38.8992 9.44258   2
   2   2   4 50.4456 10.2848   2
  -2  -2  -4 39.0551 6.78864   2
  -2   2  -5 302.733 25.7754   2
   2   2   5 318.588 25.4104   2
  -2  -2  -5 381.813 24.5617   2
   2   2   6 555.674 35.1258   2
  -2   2  -6 498.253 35.9462   2
  -2  -2  -6 442.773 27.8324   2
  -2  -2  -7 624.045 35.2645   2
  -2   2  -7 570.803 40.1327   2
   2   2   7 643.772 39.8622   2
  -2   2  -8 133.208 19.7132   3
  -2  -2  -8 133.731 17.5247   2
   2   2   8 131.261 21.5381   2
  -2   2  -8 125.308 20.0188   2
  -2   2  -9 289.360 28.3270   3
   2   2   9 268.520 28.1517   2
   2  -2   9 208.463 22.8132   1
  -2  -2  -9 233.816 25.2623   2
  -2   2  -9 257.507 29.7415   2
  -2  -2 -10 36.3181 12.5247   2
   2   2  10 51.8025 14.5183   2
   2  -2  10 27.6974 9.42543   1
  -2   2 -10 36.7475 13.3465   3
  -2   2 -10 31.9873 13.5810   2
  -2  -2 -10 32.5286 10.0043   3
   2   2  11 370.513 36.1141   2
   2  -2  11 356.325 26.0007   1
  -2  -2 -11 445.556 38.6855   2
  -2   2 -11 372.075 36.3243   2
  -2   2 -11 356.409 36.1633   3
  -2  -2 -11 348.983 30.9006   3
   2  -2  12 20.0507 7.50063   1
  -2  -2 -12 19.9530 8.22710   2
  -2   2 -12 25.8149 11.4272   3
   2   2  12 7.06867 6.09893   2
  -2  -2 -12 22.9736 7.84665   3
  -2  -2 -13 7.74140 3.18744   3
  -2   2 -13 5.83810 9.77993   3
  -2  -2 -13 5.68672 12.4272   2
   2   2  13 14.4180 5.01029   2
   2  -2  13 8.62262 5.56471   1
   2   2  14 4.39402 3.80388   1
   2  -2  14 4.20220 9.21556   1
  -2   2 -14-1.68124 4.61861   3
  -2  -2 -14-2.80855 8.13703   3
   2  -2  15 38.9084 10.6202   1
  -2  -2 -15 42.7097 12.2866   3
   2   2  15 37.4970 5.44057   1
  -2   2 -15 43.4435 15.4453   3
  -2   2 -16 2.11348 12.5278   3
   2  -2  16-2.91462 5.73327   1
  -2  -2 -16 9.40787 6.84027   3
  -2  -2 -17 164.973 24.9394   3
  -2   2 -17 123.385 26.1374   3
  -2  -2 -18 21.7711 14.9870   3
  -2   2 -18 3.57428 4.58847   3
  -2   2 -19 203.861 36.5998   3
  -2  -2 -19 179.452 28.8731   3
  -2   2 -20 24.6667 13.4150   3
  -2  -2 -20-4.14590 12.7421   3
  -2  -2 -21 131.065 29.4710   3
  -2   2 -21 92.6916 24.4413   3
   2   3 -22 126.346 32.6962   3
   2  -3 -21 80.0824 19.1649   3
   2   3 -21 95.2608 25.6465   3
   2  -3 -20 209.812 28.4682   3
   2   3 -20 210.676 37.8568   3
   2  -3 -19 140.740 22.4880   3
   2   3 -19 134.740 28.4918   3
   2   3 -18 139.026 22.7733   3
   2  -3 -18 149.452 23.2079   3
   2   3 -17 80.3066 20.9081   3
   2  -3 -17 87.4617 16.6050   3
   2  -3 -16 18.8168 9.41374   3
   2   3 -16 22.6384 10.4185   3
   2  -3 -16 32.6782 13.1871   2
   2  -3 -15 15.8674 8.12193   3
   2  -3 -15 5.74386 6.25093   2
   2   3 -15 6.94661 3.55154   3
   2   3 -14 11.6813 10.9382   3
   2  -3 -14 4.10408 4.79322   2
   2  -3 -14 10.1322 7.53639   3
   2   3 -13 18.3553 8.77225   3
   2  -3 -13 26.9116 9.40587   2
   2  -3 -13 15.9295 6.67299   3
   2   3 -12 45.8549 13.4828   3
   2  -3 -12 55.7395 10.7995   3
   2  -3 -12 62.3898 13.8530   2
   2  -3 -11 143.583 15.2471   3
   2   3 -11 195.044 17.4756   1
   2   3 -11 130.119 19.3670   3
  -2  -3  11 164.218 21.3201   3
   2  -3 -11 142.428 15.5239   2
   2  -3 -10 526.893 26.4495   2
   2  -3 -10 508.648 27.4142   3
   2   3 -10 505.962 28.7160   1
   2   3 -10 469.443 37.1808   3
  -2  -3  10 534.609 36.9178   3
  -2   3   9 169.499 14.4928   3
   2   3  -9 180.462 21.0661   3
   2  -3  -9 168.255 12.7919   2
   2  -3  -9 177.727 14.5591   3
   2   3  -9 174.662 15.4287   1
  -2  -3   9 185.704 19.9110   3
   2   3  -8 1064.77 40.9780   1
   2  -3  -8 990.983 29.8894   2
   2  -3  -8 1081.29 35.6614   3
   2   3  -8 1030.76 49.8096   3
  -2   3   8 1026.16 35.8294   3
  -2  -3   8 1028.78 47.1625   3
   2   3  -7 451.684 29.7291   3
   2  -3  -7 470.796 20.6353   3
  -2  -3   7 418.714 28.4119   3
   2   3  -7 497.944 26.1883   1
   2  -3  -7 494.148 15.3279   2
  -2   3   7 416.011 19.6465   3
   2   3  -6 387.530 26.0146   3
  -2  -3   6 337.025 24.3081   3
  -2   3   6 374.574 16.6869   3
   2  -3  -6 416.114 16.7673   3
   2  -3  -6 350.832 13.4162   1
   2  -3  -5 129.046 8.79641   1
  -2  -3   5 161.230 15.1860   3
   2   3  -5 184.796 16.6872   3
  -2   3   5 171.139 9.93690   3
   2  -3  -5 187.735 9.91595   3
   2  -3  -4 72.8355 5.84628   3
   2   3  -4 62.9531 8.99296   3
  -2  -3   4 61.7748 9.14032   3
  -2   3   4 66.9924 5.71202   3
  -2   3   3 31.0242 3.43156   3
   2   3  -3 32.4403 6.38409   3
  -2  -3   3 29.4370 5.44570   3
  -2  -3   2 414.202 20.6719   3
   2   3  -2 422.947 21.0397   3
  -2  -3   1 7.56034 3.58502   3
   2   3  -1 4.85723 3.22247   2
  -2   3   1 6.00974 4.45930   2
   2   3  -1 4.67013 2.75443   3
  -2  -3   0 4.43662 1.60068   3
   2   3   0 1.70387 3.04139   2
   2   3   0 5.16148 3.32250   3
  -2   3   0 9.04400 5.39190   2
  -2  -3  -1 560.949 25.2226   2
   2   3   1 716.640 27.6126   2
  -2  -3  -1 748.702 24.8765   3
   2   3   1 806.156 25.5574   3
  -2   3  -1 849.887 36.1621   2
  -2  -3  -2 221.856 12.3907   3
   2   3   2 236.515 15.3357   2
  -2  -3  -2 266.608 15.6935   2
  -2   3  -2 260.220 21.4135   2
  -2  -3  -3 146.226 10.8911   3
   2   3   3 172.608 14.5512   2
  -2   3  -3 147.395 17.3439   2
  -2  -3  -3 161.873 12.7560   2
  -2   3  -4 974.633 47.5653   2
  -2  -3  -4 1083.47 36.1376   2
   2   3   4 695.605 35.6639   2
  -2  -3  -5 52.3251 7.04000   2
   2   3   5 46.1253 9.63053   2
  -2   3  -5 47.8048 12.0676   2
  -2   3  -6 203.130 24.5394   2
   2   3   6 235.923 24.8190   2
  -2  -3  -6 214.243 18.3604   2
  -2   3  -7 3.42464 8.08865   3
  -2   3  -7 8.47898 13.2016   2
  -2  -3  -7 3.67498 4.13675   2
   2   3   7 12.7626 11.3085   2
   2  -3   7 3.45311 3.23447   1
   2  -3   8 8.57183 4.42704   1
  -2   3  -8 26.1045 10.6518   2
   2   3   8 19.1471 8.29467   2
  -2   3  -8 22.9528 12.4817   3
  -2  -3  -8 11.2799 5.70051   2
  -2   3  -9 175.083 22.9689   3
   2   3   9 203.581 25.0832   2
  -2   3  -9 217.677 27.8987   2
  -2  -3  -9 192.615 21.9880   2
   2  -3   9 216.011 20.4094   1
  -2  -3 -10 131.539 18.2082   2
  -2   3 -10 145.148 22.8820   2
   2  -3  10 112.280 16.2925   1
  -2   3 -10 127.214 21.6974   3
   2   3  10 122.317 20.2994   2
   2   3  11 302.363 35.3553   2
  -2  -3 -11 298.329 28.1632   2
   2  -3  11 313.089 25.6462   1
  -2   3 -11 313.916 33.2347   3
  -2  -3 -11 301.886 27.0279   3
  -2   3 -12 281.615 32.5977   3
   2  -3  12 288.360 25.2490   1
  -2  -3 -12 261.026 26.8560   3
  -2  -3 -12 346.207 31.7641   2
   2   3  12 321.862 34.7351   2
  -2   3 -13 209.659 28.8131   3
   2  -3  13 221.669 23.3902   1
  -2  -3 -13 207.135 26.6677   2
   2   3  13 227.788 32.5670   2
  -2  -3 -13 220.879 24.6505   3
  -2  -3 -14 218.469 26.3455   3
   2  -3  14 245.371 24.6654   1
   2   3  14 199.506 15.4679   1
   2   3  14 214.095 38.2533   2
  -2   3 -14 214.633 30.8464   3
  -2  -3 -15 287.478 29.9940   3
  -2   3 -15 263.928 34.1890   3
   2  -3  15 301.547 28.2356   1
   2   3  15 231.800 35.9099   2
  -2  -3 -16 224.792 28.0459   3
   2  -3  16 247.025 26.4610   1
  -2   3 -16 197.739 27.8406   3
  -2   3 -17 100.412 21.9315   3
  -2  -3 -17 131.438 21.3514   3
  -2  -3 -18 17.7012 9.47990   3
  -2   3 -18 45.5712 18.0991   3
  -2   3 -19 26.1205 19.2151   3
  -2  -3 -19 17.6446 4.46643   3
  -2   3 -20-0.26884 8.78762   3
  -2  -3 -20 9.22928 7.96316   3
   2   4 -21 12.4935 22.4781   3
   2   4 -20-2.24212 7.25651   3
   2  -4 -19 21.0220 10.9669   3
   2   4 -19 31.4602 11.6257   3
   2  -4 -18 73.1894 15.4954   3
   2   4 -18 41.1218 14.2052   3
   2   4 -17 49.8003 12.2900   3
   2  -4 -17 62.2088 14.4806   3
   2  -4 -16 433.130 33.0791   3
   2   4 -16 385.768 42.8434   3
   2  -4 -16 260.702 23.1214   2
   2   4 -15 24.2743 13.7011   3
   2  -4 -15 12.5597 5.60154   3
   2  -4 -15 6.82451 4.75328   2
   2   4 -14 607.305 49.4038   3
   2  -4 -14 621.566 36.0564   3
   2  -4 -14 601.696 32.4097   2
   2   4 -13 239.674 29.1657   3
   2  -4 -13 252.203 21.2047   3
   2  -4 -13 237.843 18.3249   2
   2  -4 -12 133.696 14.4997   3
   2   4 -12 139.672 21.6323   3
   2   4 -12 162.324 17.6882   1
   2  -4 -12 145.919 12.5080   2
   2   4 -11 296.902 31.1572   3
   2  -4 -11 326.780 17.6816   2
   2   4 -11 342.230 25.3552   1
   2  -4 -11 271.116 19.3593   3
   2   4 -10 44.7340 12.3725   3
   2   4 -10 56.8207 8.46323   1
  -2  -4  10 59.5548 12.9133   3
   2  -4 -10 48.8878 5.92436   2
   2  -4 -10 49.8058 7.16672   3
   2   4  -9 11.1797 4.95939   1
   2  -4  -9 10.3235 4.05371   3
  -2  -4   9 17.7610 6.11376   3
   2   4  -9 14.5290 6.44414   3
   2  -4  -9 11.1389 3.09420   2
   2   4  -8 122.223 18.0324   3
  -2   4   8 128.805 10.4891   3
  -2  -4   8 106.651 14.2730   3
   2   4  -8 129.669 14.6172   1
   2  -4  -8 124.694 9.49634   3
   2  -4  -8 106.176 6.99520   2
   2  -4  -7 4.74451 2.19675   3
  -2  -4   7 7.44503 2.46389   3
  -2   4   7 11.7505 3.29191   3
   2   4  -7-0.59901 4.10451   1
  -2   4   7 5.83550 2.42590   2
   2   4  -7 11.0527 5.31622   3
  -2   4   6 740.555 22.6082   3
   2   4  -6 690.356 35.4114   1
   2   4  -6 823.629 41.0283   3
   2  -4  -6 873.852 27.8142   1
   2  -4  -6 854.427 23.3578   3
  -2  -4   6 845.575 40.4528   3
  -2  -4   5 7.12467 6.49813   3
   2  -4  -5 4.51048 1.37785   1
  -2   4   5 4.43955 1.73974   3
   2   4  -5 3.33421 4.04121   3
  -2  -4   4 1540.84 51.9649   3
  -2   4   4 1429.62 32.3205   3
   2   4  -4 1523.40 52.1533   3
  -2   4   4 1542.97 31.9165   2
   2  -4  -4 1483.26 42.0427   1
  -2   4   3 7.43907 2.92535   3
   2  -4  -3 9.98842 3.72286   1
   2   4  -3 7.59559 4.83362   3
  -2  -4   3 1.61100 2.01602   3
   2  -4  -2 1236.18 40.6023   1
   2   4  -2 1298.27 41.9280   3
  -2  -4   2 1195.76 40.9440   3
   2   4  -1 86.9278 9.35686   3
  -2  -4   1 88.3325 9.67911   3
   2  -4  -1 61.0514 9.24225   1
   2   4   0 784.860 27.3365   3
   2  -4   0 695.994 30.9791   1
  -2  -4   0 691.556 26.6524   3
   2   4   0 576.384 27.6973   2
   2   4   1 29.6330 5.55290   2
  -2  -4  -1 24.4768 4.61347   3
   2  -4   1 15.3551 6.38263   1
   2   4   1 28.4459 5.31175   3
   2   4   2 13.3153 6.03130   2
   2  -4   2 15.3560 3.17239   1
  -2  -4  -2 15.6449 3.67192   3
  -2  -4  -2 18.7869 4.73646   2
   2   4   2 16.4870 3.92261   3
   2   4   3 200.845 15.0836   2
  -2  -4  -3 178.619 14.1367   2
  -2  -4  -3 216.908 12.4707   3
  -2   4  -3 248.565 23.3546   2
   2  -4   3 161.541 18.0004   1
   2  -4   4 370.900 26.6874   1
   2   4   4 440.043 25.7070   2
  -2  -4  -4 437.909 22.9312   2
  -2   4  -4 495.541 35.3155   2
  -2  -4  -4 415.230 18.6375   3
  -2   4  -5 713.381 44.7489   2
   2   4   5 530.469 32.3359   2
   2  -4   5 685.987 36.7847   1
  -2  -4  -5 693.368 30.1355   2
  -2  -4  -6 1260.32 44.0623   2
   2  -4   6 1302.49 51.8431   1
  -2   4  -6 1218.82 55.8420   3
  -2   4  -6 1379.16 66.6678   2
   2   4   6 1033.08 54.9205   2
  -2  -4  -7 325.319 21.5726   2
   2   4   7 363.945 32.4709   2
  -2   4  -7 356.989 34.7261   2
   2  -4   7 310.100 24.3150   1
  -2   4  -7 295.381 28.1955   3
   2   4   8 1564.31 67.5694   2
  -2   4  -8 1504.29 69.6111   3
  -2  -4  -8 1511.18 52.7010   2
   2  -4   8 1486.15 59.4425   1
  -2   4  -8 1688.45 78.1740   2
  -2   4  -9 212.358 26.4905   2
  -2   4  -9 181.917 24.8742   3
  -2  -4  -9 198.473 18.7957   2
   2  -4   9 184.814 20.9976   1
   2   4   9 170.118 22.2229   2
   2  -4  10 577.820 36.8046   1
  -2  -4 -10 705.346 41.2763   2
  -2   4 -10 623.754 46.7370   3
  -2  -4 -10 590.874 35.4162   3
   2   4  10 572.764 44.8910   2
  -2   4 -11 104.895 17.9178   3
   2   4  11 124.144 20.0585   2
   2  -4  11 139.981 18.8435   1
  -2  -4 -11 123.837 15.9628   3
  -2  -4 -11 124.106 16.4364   2
   2  -4  12 333.925 29.5673   1
  -2  -4 -12 360.132 28.1940   2
  -2   4 -12 280.042 32.4405   3
  -2  -4 -12 320.107 28.0362   3
   2   4  12 318.508 35.8557   2
   2  -4  13 56.9515 11.2473   1
  -2   4 -13 56.0183 16.4606   3
  -2  -4 -13 77.6005 14.6199   3
   2   4  13 51.9589 15.8874   2
  -2  -4 -13 62.0576 13.9941   2
   2   4  14 9.20785 4.34320   2
  -2   4 -14 1.41016 5.94705   3
  -2  -4 -14-5.00988 11.0940   3
   2  -4  14 3.60511 8.25669   1
  -2  -4 -15 12.5694 5.47266   3
   2  -4  15 12.5674 7.52869   1
  -2   4 -15 22.7866 13.6031   3
   2   4  15 45.1054 19.5187   2
   2   4  16 61.9408 16.4948   2
  -2   4 -16 66.7523 20.7263   3
  -2  -4 -16 54.9043 14.8175   3
  -2  -4 -17 22.2437 10.5162   3
  -2   4 -17 8.58016 8.56380   3
  -2   4 -18 136.298 25.2171   3
  -2  -4 -18 161.432 25.0752   3
  -2   4 -19 32.1575 16.7160   3
  -2  -4 -19 24.1403 10.8852   3
  -2   4 -20 150.284 32.1631   3
   2   5 -20 34.0341 11.0124   3
   2   5 -19 90.4725 19.8957   3
   2   5 -18 42.7675 19.0465   3
   2  -5 -18 58.3123 10.9580   3
   2  -5 -17 35.2682 10.6412   3
   2   5 -17 20.6144 10.8892   3
   2   5 -16 25.6197 15.4187   3
   2  -5 -16 42.0747 9.09826   3
   2  -5 -15-7.07842 6.94346   3
   2   5 -15 10.0090 8.24443   3
   2   5 -14 54.2070 17.2876   3
   2  -5 -14 55.6406 7.95132   3
   2  -5 -14 68.7745 8.55934   2
   2   5 -13 71.1398 16.9799   3
   2  -5 -13 81.5166 9.00573   2
   2  -5 -13 73.0875 10.8989   3
   2   5 -12 3.09177 2.49002   1
   2  -5 -12-0.87097 2.09464   3
   2   5 -12 2.67684 5.57035   3
   2  -5 -12-1.82023 1.21504   2
   2  -5 -11 398.558 21.1427   3
   2   5 -11 350.288 34.5126   3
   2   5 -11 451.605 31.7565   1
   2   5 -10 12.5011 4.35449   3
   2  -5 -10 6.29015 3.52378   3
   2  -5 -10 4.30691 2.23139   2
   2   5 -10-0.04342 4.17624   1
  -2  -5   9 1106.97 54.4159   3
   2   5  -9 1071.12 45.5880   1
   2   5  -9 1024.38 53.0201   3
   2  -5  -9 1078.56 27.4855   3
   2  -5  -8 38.4366 4.46940   3
   2   5  -8 50.2975 10.9473   3
  -2   5   8 46.3243 6.49929   2
   2   5  -8 51.8571 10.1208   1
  -2  -5   8 68.6302 12.4797   3
   2  -5  -7 627.195 18.6010   3
  -2  -5   7 755.520 41.0762   3
   2   5  -7 807.101 43.1416   3
  -2   5   7 579.615 23.6906   2
   2   5  -7 895.337 41.3833   1
  -2  -5   6 6.66815 4.61372   3
   2   5  -6 14.1516 4.98216   1
   2   5  -6 2.02386 3.51269   3
  -2   5   6 4.78634 1.68484   2
  -2  -5   5 88.6021 12.8817   3
   2   5  -5 91.9323 12.9576   3
   2   5  -5 76.8685 11.8142   1
  -2   5   5 89.0376 6.08971   2
   2  -5  -5 83.1079 9.75316   1
   2  -5  -4 4.43679 2.81308   1
   2   5  -4 5.87785 5.07916   3
  -2  -5   4 2.46748 4.13589   3
  -2   5   4 2.03576 1.44896   2
  -2  -5   3 0.78965 4.25437   3
   2  -5  -3 6.01659 4.36717   1
   2   5  -3 1.80421 2.66317   3
   2   5  -2 54.4341 8.96394   3
  -2  -5   2 42.5923 3.47427   3
   2  -5  -2 65.6293 9.60786   1
  -2  -5   1 722.973 31.2862   3
   2  -5  -1 864.248 36.4508   1
   2   5  -1 856.700 32.8598   3
  -2  -5   0 11.6250 6.86843   3
   2  -5   0 1.89432 5.02220   1
   2   5   0 6.85163 5.51433   3
   2   5   0 2.08826 5.16197   2
   2   5   1 2159.84 61.6888   2
   2  -5   1 2181.17 67.8273   1
   2   5   1 2273.26 54.6147   3
  -2  -5  -1 2072.40 54.2576   3
   2  -5   2 85.2260 13.0818   1
  -2  -5  -2 84.8073 7.98986   3
   2   5   2 110.623 11.6639   2
   2   5   2 104.139 9.20728   3
  -2  -5  -3 1035.59 39.6853   2
  -2  -5  -3 1131.97 33.1557   3
   2  -5   3 1204.65 50.3865   1
   2   5   3 1149.25 42.2307   2
   2   5   4 51.4580 8.25455   2
  -2   5  -4 38.6071 8.47626   3
   2  -5   4 38.0498 9.30010   1
  -2  -5  -4 42.2688 5.21113   3
  -2  -5  -4 50.9566 8.01571   2
  -2   5  -5 632.744 44.7822   2
  -2  -5  -5 635.740 29.5934   2
   2  -5   5 607.486 35.3056   1
   2   5   5 690.852 34.6822   2
  -2   5  -5 589.939 39.3948   3
  -2  -5  -5 585.221 22.9636   3
  -2   5  -6 2.55931 7.12301   3
  -2  -5  -6-0.08383 1.81553   3
  -2   5  -6 4.09348 9.12446   2
  -2  -5  -6 1.10309 3.09181   2
   2   5   6 3.89353 9.65038   2
   2  -5   6-2.69517 7.02261   1
  -2  -5  -7 236.953 18.8852   2
   2   5   7 261.452 26.1124   2
  -2   5  -7 319.001 30.6599   3
  -2   5  -7 320.415 35.7171   2
   2  -5   7 270.096 24.4409   1
  -2   5  -8 12.2585 10.6402   3
  -2  -5  -8 13.1519 6.34285   2
   2   5   8 18.5808 12.8137   2
   2  -5   8-0.32134 4.26812   1
  -2   5  -8 12.2885 13.9029   2
   2  -5   9 54.2100 13.1867   1
  -2  -5  -9 53.0216 10.4370   2
  -2   5  -9 61.6195 14.7491   3
   2   5   9 52.1573 12.7516   2
  -2  -5 -10 159.624 17.5244   3
  -2   5 -10 146.841 23.5696   3
  -2  -5 -10 166.675 16.4624   2
   2   5  10 153.375 22.9705   2
   2  -5  10 151.321 19.6239   1
  -2  -5 -11 131.000 15.6040   2
   2  -5  11 89.5754 17.6849   1
   2   5  11 105.933 19.1636   2
  -2  -5 -11 120.279 15.3655   3
  -2   5 -11 105.547 19.2123   3
  -2  -5 -12 64.2958 12.5068   2
  -2   5 -12 40.3999 15.2269   3
  -2  -5 -12 56.8359 11.7612   3
   2  -5  12 39.0187 9.62705   1
   2   5  12 41.7936 11.0478   2
   2  -5  13 431.483 37.2360   1
  -2  -5 -13 332.249 27.6872   2
  -2  -5 -13 374.727 29.6116   3
  -2   5 -13 343.255 37.5885   3
   2   5  13 326.090 35.7226   2
  -2   5 -14 48.3467 13.4924   3
   2  -5  14 69.9210 15.7524   1
  -2  -5 -14 55.7738 10.2323   3
   2   5  14 75.3271 18.5181   2
   2  -5  15 206.446 25.9730   1
  -2   5 -15 197.014 34.0043   3
   2   5  15 169.594 34.4527   2
  -2  -5 -15 215.288 23.8828   3
  -2  -5 -16 106.549 14.6518   3
   2   5  16 71.5829 18.1562   2
  -2   5 -16 87.7915 21.7692   3
  -2  -5 -17 61.5228 8.68078   3
  -2   5 -17 33.5993 14.1848   3
  -2   5 -18 34.2479 14.1595   3
  -2   5 -19-62.4530 19.8809   3
   2   6 -20 10.6670 21.6809   3
   2   6 -19 10.7759 15.7459   3
   2   6 -18 63.7317 24.0907   3
   2   6 -17 113.092 26.6976   3
   2  -6 -16 232.957 19.2722   3
   2   6 -16 222.481 33.1047   3
   2   6 -15 408.523 44.0621   3
   2  -6 -15 448.884 25.6347   3
   2  -6 -14 239.491 15.6586   2
   2   6 -14 217.231 32.1628   3
   2  -6 -14 253.227 18.0764   3
   2  -6 -13 472.831 22.8561   3
   2   6 -13 446.352 43.6993   3
   2  -6 -12 162.444 11.3460   2
   2  -6 -12 203.218 13.5079   3
   2   6 -12 200.229 26.4247   3
   2   6 -12 245.314 25.9060   1
   2   6 -11 175.861 22.1486   1
   2   6 -11 132.205 19.8664   3
   2  -6 -11 138.409 9.69594   3
   2   6 -10 193.693 26.7831   3
   2   6 -10 254.609 24.6107   1
   2   6  -9 36.5867 9.41931   3
   2   6  -9 55.2522 10.6176   1
  -2   6   9 33.7993 6.90527   2
   2   6  -8 49.0302 11.8769   3
  -2   6   8 41.7987 7.99402   2
  -2  -6   8 41.2668 12.5990   3
   2   6  -8 50.2231 11.8928   1
  -2  -6   7 18.1554 8.65318   3
   2   6  -7 12.6288 7.86101   1
  -2   6   7 11.3428 3.61310   2
   2   6  -7 10.6748 5.42965   3
   2   6  -6 31.2214 7.72808   3
  -2  -6   6 35.7395 11.0573   3
   2   6  -6 28.5906 7.82907   1
  -2   6   6 41.0791 5.00801   2
  -2   6   5 495.091 19.0197   2
   2   6  -5 510.712 32.6654   3
  -2  -6   5 490.164 32.3724   3
   2   6  -5 478.959 31.8587   1
   2   6  -4 4.10645 2.94770   3
   2  -6  -4 7.71042 4.96995   1
  -2  -6   4 4.56362 5.19294   3
  -2   6   4 3.43450 1.25749   3
   2   6  -4 1.12996 4.16489   1
  -2  -6   3 660.227 33.4861   3
   2   6  -3 698.737 34.8651   3
  -2   6   3 601.405 21.2436   3
   2  -6  -3 641.956 32.2795   1
   2   6  -2 23.6807 4.79083   3
  -2  -6   2 16.6334 4.95524   3
  -2   6   2 20.3903 4.25458   3
   2  -6  -2 18.3801 6.36354   1
  -2  -6   1 232.815 17.4220   3
   2   6  -1 277.914 18.6216   3
  -2   6   1 253.001 16.7827   3
   2  -6  -1 249.549 20.3109   1
   2   6   0 18.6358 5.82060   2
  -2   6   0 27.6550 6.59285   3
   2   6   0 23.0402 5.74493   3
  -2  -6   0 20.3718 7.19644   3
   2  -6   0 17.6491 4.78341   1
  -2   6  -1 178.034 16.6201   3
  -2  -6  -1 165.490 12.6525   3
   2   6   1 190.855 13.6546   3
   2  -6   1 167.469 18.4881   1
   2   6   1 186.437 17.3074   2
   2   6   2 0.38466 1.40855   3
  -2  -6  -2 0.88835 1.40212   3
   2   6   2 1.22273 3.84642   2
  -2   6  -2-0.80129 2.81347   3
   2  -6   2-0.75779 2.70122   1
  -2  -6  -3 168.332 11.5162   3
  -2   6  -3 170.004 18.5266   3
   2   6   3 161.439 16.0831   2
   2  -6   3 186.034 19.9409   1
  -2  -6  -4 59.3479 9.46901   2
  -2  -6  -4 51.8965 6.40496   3
  -2   6  -4 50.7313 9.60832   3
   2   6   4 34.5329 6.93268   2
   2  -6   4 45.0665 10.2513   1
   2   6   5 397.116 26.9539   2
  -2   6  -5 325.647 28.3248   3
  -2  -6  -5 311.319 21.3698   2
   2  -6   5 228.624 24.4686   1
  -2  -6  -5 284.845 14.7555   3
  -2   6  -6 232.142 24.1244   3
   2   6   6 163.570 18.5394   2
  -2  -6  -6 173.089 15.8642   2
   2  -6   6 184.023 21.6903   1
  -2  -6  -6 192.049 12.2181   3
   2   6   7 799.324 44.6736   2
   2  -6   7 814.542 45.9630   1
  -2   6  -7 746.135 47.8041   3
  -2  -6  -7 733.926 27.2699   3
  -2   6  -7 951.560 61.3057   2
  -2  -6  -7 815.887 36.5212   2
   2   6   8 458.153 36.8769   2
  -2  -6  -8 436.129 21.2167   3
   2  -6   8 384.857 32.5611   1
  -2   6  -8 436.580 37.0662   3
  -2  -6  -8 443.996 28.1328   2
  -2   6  -9 395.867 37.6432   3
   2   6   9 381.462 34.8606   2
  -2  -6  -9 450.581 27.8447   2
   2  -6   9 400.387 33.1109   1
  -2   6 -10 87.5025 18.3013   3
   2  -6  10 123.815 19.9842   1
  -2  -6 -10 127.645 13.4806   3
   2   6  10 132.421 21.8081   2
  -2  -6 -10 98.5375 12.0162   2
   2  -6  11 333.962 32.3154   1
   2   6  11 361.361 35.9891   2
  -2   6 -11 333.705 36.3425   3
  -2  -6 -11 390.229 25.9814   3
  -2  -6 -11 380.353 27.7967   2
  -2  -6 -12 6.67666 5.31208   2
  -2  -6 -12-0.14907 5.44954   3
   2   6  12 26.6815 17.8591   2
  -2   6 -12 1.91228 8.31729   3
   2  -6  12 11.4240 9.78361   1
  -2   6 -13-1.50197 5.68510   3
   2   6  13-14.0962 11.5153   2
  -2  -6 -13 3.94377 5.83149   3
  -2  -6 -13-1.12344 9.06791   2
   2  -6  13 3.16438 5.34111   1
  -2  -6 -14 0.05785 2.52934   3
  -2   6 -14-3.71411 8.04839   3
   2  -6  14 15.4778 5.71822   1
   2   6  14 22.8445 15.7620   2
  -2  -6 -15 2.23275 3.91732   3
  -2   6 -15-7.18078 10.5324   3
   2   6  15 6.72766 6.60999   2
  -2  -6 -16 47.0839 13.1890   3
  -2   6 -16 19.9225 5.61958   3
   2   6  16 41.9764 12.5672   2
   2   6  17 32.5286 13.2069   2
  -2   6 -17 98.3330 26.8222   3
  -2   6 -18 27.8399 16.2299   3
   2   7 -19 19.8028 12.1730   3
   2   7 -18 84.3719 24.2061   3
   2   7 -17 13.1554 12.1606   3
   2   7 -16 0.46951 9.04204   3
   2   7 -15-1.74389 12.4528   3
   2  -7 -14 0.00357 7.37301   3
   2   7 -14 74.7853 14.0635   3
   2   7 -13 41.2170 15.8249   3
   2  -7 -13 0.00247 3.35554   3
   2   7 -12 548.208 47.6248   3
   2   7 -11 13.0453 7.25759   3
  -2   7  11 12.3564 4.42265   2
  -2   7  10 348.255 20.0417   2
   2   7 -10 451.594 38.4202   3
  -2   7   9 28.5761 7.35664   2
   2   7  -9 2.39255 8.03446   3
  -2   7   8 716.015 29.9649   2
   2   7  -8 766.105 45.8320   1
   2   7  -8 740.906 47.8164   3
   2   7  -7 26.2828 9.97119   1
  -2  -7   7 31.3994 11.5877   3
  -2   7   7 34.3249 6.77016   2
   2   7  -7 29.1403 10.9975   3
   2   7  -6 710.648 43.6424   3
  -2  -7   6 772.545 44.0324   3
  -2   7   6 731.740 25.7036   2
   2   7  -6 703.223 41.4202   1
   2   7  -5 166.817 19.3011   1
  -2  -7   5 138.832 17.0074   3
  -2   7   5 161.893 11.9170   2
   2   7  -5 150.212 18.5907   3
  -2   7   4 80.9931 5.61760   3
   2   7  -4 112.273 14.9911   3
  -2  -7   4 102.518 14.0462   3
   2   7  -4 147.281 18.0002   1
  -2   7   3 1.42542 2.37100   3
   2   7  -3 2.21528 7.26622   3
   2  -7  -3-5.22497 4.96801   1
  -2  -7   3 2.51704 2.72206   3
   2   7  -3 0.60092 1.95270   1
   2   7  -2 315.498 22.3739   3
  -2  -7   2 298.108 22.1085   3
  -2   7   2 295.643 16.9028   3
   2  -7  -2 307.450 24.9665   1
   2   7  -2 272.037 22.7421   1
   2  -7  -1 0.08029 7.44535   1
  -2  -7   1 6.81437 4.86455   3
   2   7  -1-2.05944 1.94434   3
  -2   7   1 4.29606 3.23780   3
   2   7   0 748.525 31.7279   3
   2  -7   0 545.110 35.2155   1
   2   7   0 724.726 36.9175   2
  -2  -7   0 651.077 30.5253   3
  -2   7   0 689.860 33.0069   3
   2  -7   1 151.135 18.5583   1
   2   7   1 161.054 17.8462   2
  -2   7  -1 179.976 17.5067   3
   2   7   1 187.857 14.1479   3
  -2  -7  -1 162.977 13.7764   3
   2   7   2 1276.50 38.4302   3
   2   7   2 1223.83 48.1847   2
  -2  -7  -2 1115.27 37.5292   3
  -2   7  -2 1130.20 49.5148   3
   2  -7   2 895.331 48.0323   1
   2  -7   3-0.39850 4.07334   1
  -2  -7  -3-1.90360 2.13448   3
   2   7   3 0.26069 4.37024   2
  -2   7  -3-2.72288 5.31269   3
  -2  -7  -4 794.154 27.4430   3
   2  -7   4 879.999 46.7567   1
  -2   7  -4 838.536 46.0836   3
   2   7   4 824.117 39.1587   2
  -2  -7  -5-1.43125 1.94276   3
   2   7   5-0.11115 3.88173   2
  -2   7  -5-0.58994 7.90657   3
   2  -7   5-3.50805 4.00093   1
   2   7   6 637.694 36.7399   2
  -2   7  -6 548.323 40.5949   3
  -2  -7  -6 606.987 32.7750   2
   2  -7   6 610.817 40.5330   1
  -2  -7  -6 585.775 21.5183   3
  -2  -7  -7-3.38334 6.74039   2
  -2  -7  -7 1.18058 2.51319   3
   2  -7   7-2.54957 4.09025   1
  -2   7  -7 23.0959 10.7968   3
   2   7   7 22.9193 11.0163   2
   2   7   8 271.199 28.9171   2
   2  -7   8 249.108 26.2424   1
  -2  -7  -8 273.561 14.5726   3
  -2   7  -8 275.880 31.4397   3
  -2  -7  -8 325.905 24.2393   2
  -2  -7  -9 20.1092 4.59670   3
   2   7   9 6.87675 11.1015   2
  -2   7  -9 28.1424 13.1575   3
  -2  -7  -9 16.8424 4.71236   2
   2  -7   9 15.9799 8.03696   1
   2   7  10 20.3034 9.49665   2
  -2  -7 -10 15.1632 4.71708   3
  -2   7 -10 0.41829 4.99805   3
  -2  -7 -10 6.98883 3.02214   3
  -2  -7 -10 12.4933 6.59872   2
   2  -7  10 11.8134 10.8472   1
   2   7  11 57.8750 8.00455   1
   2   7  11 56.7428 11.6985   2
   2  -7  11 80.3080 18.3439   1
  -2  -7 -11 68.9809 9.55947   3
  -2  -7 -11 72.5556 12.1304   2
  -2   7 -11 59.0345 15.7742   3
  -2  -7 -11 57.0850 7.01332   3
   2  -7  12 376.405 36.9047   1
  -2  -7 -12 382.383 24.2736   3
  -2   7 -12 366.634 41.1878   3
  -2  -7 -12 399.613 24.0196   3
   2   7  12 397.780 39.4242   2
  -2  -7 -12 347.491 27.9518   2
  -2  -7 -13 3.41593 4.03065   3
  -2  -7 -13 3.93455 5.10487   2
  -2   7 -13-0.42837 5.83158   3
   2   7  13 3.87180 5.79096   2
   2  -7  13 16.6358 8.84640   1
  -2  -7 -14 154.251 16.3846   3
  -2   7 -14 158.434 29.3262   3
   2   7  14 145.155 24.3017   2
   2   7  15 6.43783 7.71322   2
  -2   7 -15 8.76330 9.18585   3
   2   7  16-1.43286 7.73090   2
  -2   7 -16 3.35666 12.3046   3
  -2   7 -17-2.03155 5.55330   3
  -2   7 -18 28.1000 21.9331   3
   2   8 -18 37.0096 14.9255   3
   2   8 -17 65.1347 20.0439   3
   2   8 -16 166.332 34.7027   3
   2   8 -15 182.872 32.8395   3
   2   8 -14 340.613 40.7746   3
   2   8 -13 245.950 34.5961   3
  -2   8  12 23.5339 7.50056   2
   2   8 -12 312.453 35.1593   3
   2   8 -11 158.236 26.5129   3
  -2   8  11 83.1881 10.6944   2
  -2   8  10 138.528 14.0460   2
   2   8 -10 129.718 21.6447   3
   2   8  -9 70.0894 15.2389   3
  -2   8   9 84.5129 10.1144   2
  -2   8   8 62.8490 9.41137   2
   2   8  -8 60.4227 16.1784   3
   2   8  -7 8.87604 7.67656   3
  -2   8   7 10.6422 3.72369   2
  -2   8   6 5.70300 3.26264   2
   2   8  -6 2.40769 5.17885   3
  -2  -8   6 10.4668 7.96118   3
   2   8  -5 62.6707 14.1378   3
  -2  -8   5 51.7816 10.0667   3
  -2   8   5 40.3682 6.90682   2
   2   8  -4 118.034 17.1372   3
   2   8  -4 128.169 16.6653   1
  -2  -8   4 104.190 14.4222   3
  -2   8   4 72.9779 5.43780   3
  -2   8   4 111.205 11.6780   2
   2   8  -3 65.7537 12.4876   3
  -2   8   3 64.0325 6.93770   3
   2   8  -3 56.9871 10.1478   1
  -2  -8   3 66.0246 11.2285   3
   2  -8  -2 75.9942 11.9249   1
   2   8  -2 62.5829 12.8523   1
  -2   8   2 84.3776 9.33922   3
  -2  -8   2 69.0297 11.1274   3
   2   8  -2 83.4730 12.7384   3
   2   8  -1 12.6719 4.89267   3
   2   8  -1 3.44712 5.44209   1
   2  -8  -1 5.29352 6.00755   1
  -2  -8   1 8.58066 3.04680   3
  -2   8   1 10.2946 3.25300   3
  -2  -8   0 14.7493 5.33135   3
  -2   8   0 8.85147 5.51177   3
   2   8   0 12.3134 4.81416   1
   2   8   0 11.9069 7.66993   2
   2  -8   0 7.74410 5.25197   1
   2   8   0 9.02570 5.22828   3
  -2  -8  -1 6.80795 2.38415   3
   2   8   1 15.9553 7.36023   1
   2  -8   1 13.5844 7.52267   1
   2   8   1 16.7154 5.20660   3
   2   8   1 12.0906 6.83194   2
  -2   8  -1 17.6363 5.96017   3
  -2  -8  -2 8.97027 3.73423   3
  -2   8  -2 2.83487 2.68107   3
   2   8   2 6.76994 3.29036   2
   2  -8   2 1.08602 2.93842   1
   2   8   2 10.7552 4.38379   3
   2  -8   3 76.1341 15.8926   1
   2   8   3 89.6979 13.9347   2
  -2  -8  -3 83.1373 8.71047   3
   2   8   3 100.890 9.75233   3
  -2   8  -3 73.0739 13.6245   3
   2  -8   4 90.4871 17.2247   1
  -2  -8  -4 116.200 9.66970   3
  -2   8  -4 123.594 16.7697   3
   2   8   4 176.556 18.9650   2
   2  -8   5 327.869 31.4154   1
  -2   8  -5 333.863 30.6543   3
   2   8   5 348.254 25.5527   2
   2   8   6 484.581 32.5776   2
   2  -8   6 320.982 32.6513   1
  -2   8  -6 350.042 32.8011   3
   2   8   7 164.811 20.9804   2
   2  -8   7 135.932 21.8393   1
  -2   8  -7 157.544 23.1445   3
   2   8   8 375.592 32.5944   2
  -2   8  -8 380.577 36.7944   3
   2   8   8 398.731 26.0260   1
   2  -8   8 410.744 36.2488   1
  -2  -8  -8 339.810 15.1134   3
   2  -8   9 144.889 22.1189   1
  -2   8  -9 126.073 21.1611   3
  -2  -8  -9 138.152 9.28759   3
  -2  -8  -9 158.380 16.5967   2
   2   8   9 144.854 22.5359   2
   2   8   9 128.648 13.0027   1
  -2  -8 -10 198.972 20.3070   2
  -2  -8 -10 190.025 11.5599   3
  -2   8 -10 195.696 29.6528   3
   2  -8  10 186.122 24.2990   1
   2   8  10 199.862 29.0193   2
   2   8  10 171.786 17.3707   1
  -2   8 -11 127.234 25.7969   3
  -2  -8 -11 87.4956 13.1239   2
  -2  -8 -11 107.062 9.30402   3
   2   8  11 103.830 20.1715   2
   2  -8  11 100.744 19.8252   1
   2   8  12 72.6147 17.9455   2
  -2  -8 -12 52.0777 6.31463   3
  -2   8 -12 53.3526 17.5229   3
  -2  -8 -12 53.0882 10.4483   2
  -2   8 -13 34.3051 11.3483   3
   2   8  13 24.8202 11.3073   2
   2   8  14 10.3428 15.1649   2
  -2   8 -14 1.91967 13.8571   3
  -2   8 -15 0.75404 9.76866   3
   2   8  15 30.3801 17.3915   2
  -2   8 -16 22.2488 19.6644   3
  -2   8 -17 98.4768 27.5234   3
   2   9 -17 55.8100 23.1765   3
   2   9 -16 10.4017 11.1191   3
   2   9 -15 16.2169 13.8885   3
   2   9 -14 4.75873 5.37316   3
   2   9 -13 85.6035 21.2237   3
   2   9 -12 20.4592 14.5323   3
   2   9 -11 299.276 35.7153   3
  -2   9  11 91.9807 17.3259   2
  -2   9  10 22.3997 7.53042   2
   2   9 -10 12.8209 8.67814   3
   2   9  -9 753.949 54.2930   3
  -2   9   9 774.010 34.9068   2
  -2   9   8 22.8997 6.75387   2
   2   9  -8 6.26667 4.89417   3
   2   9  -7 616.727 45.2183   3
  -2   9   7 669.956 27.5992   2
  -2   9   6 21.7534 3.51578   2
   2   9  -6 10.9966 6.79382   3
  -2   9   5 195.512 15.8626   2
   2   9  -5 181.026 21.8075   3
  -2  -9   5 210.984 23.8900   3
   2   9  -4 13.1480 8.25016   3
  -2   9   4 2.87988 1.49435   3
  -2  -9   4 11.5697 2.79403   3
  -2   9   4 12.6885 2.32021   2
   2   9  -3 4.75975 6.40430   3
  -2   9   3-2.29966 2.88272   3
  -2  -9   3-5.73597 6.18251   3
  -2  -9   2 16.2785 2.74545   3
  -2   9   2 15.5713 5.56755   3
   2   9  -2 13.9323 4.42818   3
   2   9  -1 150.379 16.9026   3
  -2  -9   1 137.228 15.0591   3
  -2   9   1 138.717 14.9610   3
   2   9   0 26.0292 9.51623   1
   2   9   0 18.5371 8.24289   2
  -2   9   0 15.8315 6.78949   3
  -2  -9   0 31.5756 9.60773   3
   2   9   0 12.4661 5.16159   3
   2  -9   1 602.219 41.3507   1
   2   9   1 475.398 34.9882   1
   2   9   1 483.321 34.8635   2
  -2  -9  -1 544.513 28.6051   3
  -2   9  -1 572.731 34.1811   3
   2   9   1 626.057 29.6818   3
  -2  -9  -2 7.97233 2.51035   3
   2   9   2 14.4969 6.00441   2
   2   9   2 12.3797 3.34233   1
  -2   9  -2 7.28161 5.51682   3
   2  -9   2 14.8234 7.71617   1
   2   9   2 9.49468 2.23964   3
   2   9   3 573.587 24.8813   3
  -2   9  -3 545.924 37.5680   3
   2   9   3 622.282 37.7879   1
  -2  -9  -3 554.236 25.2379   3
   2   9   3 481.651 32.4745   2
   2  -9   3 457.096 38.3327   1
   2  -9   4 12.2503 5.09223   1
   2   9   4 15.2238 7.53603   2
   2   9   4 15.7687 6.82106   1
  -2   9  -4 12.2343 7.13912   3
  -2  -9  -4 4.32290 3.24368   3
   2   9   5 470.833 31.1219   1
   2   9   5 439.417 30.4847   2
   2  -9   5 386.335 36.0485   1
  -2   9  -5 469.222 37.8225   3
  -2   9  -6 7.07188 7.66946   3
   2  -9   6 9.82425 8.01830   1
   2   9   6 16.6159 1.96939   1
   2   9   6 19.2820 5.11619   2
  -2   9  -7 212.717 26.1453   3
   2  -9   7 190.253 26.6794   1
   2   9   7 199.158 23.4115   2
   2   9   7 182.192 19.2929   1
   2   9   8 11.3875 10.6305   2
  -2   9  -8 6.24117 6.27725   3
   2  -9   8 16.7390 12.0168   1
   2   9   8 14.2124 6.55288   1
   2  -9   9 3.02790 7.13784   1
   2   9   9 1.04578 2.92936   1
  -2   9  -9-1.19418 7.12705   3
   2   9   9 5.08894 4.99819   2
   2   9  10 5.22580 6.72201   2
  -2   9 -10 6.86292 6.60886   3
   2   9  10 10.8429 7.08327   1
   2   9  11 113.163 21.3818   2
  -2   9 -11 78.9862 18.9881   3
   2   9  12 17.5312 15.0887   2
  -2   9 -12 24.1033 16.5425   3
  -2   9 -13 174.298 32.5876   3
   2   9  13 203.658 28.8970   2
  -2   9 -14 6.91115 12.3274   3
   2   9  14 10.6678 4.22855   2
  -2   9 -15 96.9704 26.2347   3
  -2   9 -16 74.2060 26.9169   3
   2  10 -16 85.7175 22.0904   3
   2  10 -15 158.156 31.8543   3
   2  10 -14 122.827 27.4665   3
   2  10 -13 189.659 33.0182   3
   2  10 -12 85.2581 22.2925   3
   2  10 -11 122.275 22.1261   3
  -2  10  10 10.4701 3.55151   2
   2  10 -10 9.07722 7.25641   3
  -2  10   9 19.4377 4.51674   2
   2  10  -9 28.8293 12.2852   3
   2  10  -8 12.0774 5.08758   3
  -2  10   8 4.14931 2.87637   2
  -2  10   7 10.4336 4.59270   2
   2  10  -7-2.09397 6.78942   3
   2  10  -6 142.490 21.7808   3
  -2  10   6 142.568 14.1013   2
   2  10  -5 57.3289 15.0595   3
  -2  10   5 52.7315 9.08835   2
   2  10  -4 255.956 26.4845   3
  -2  10   4 269.968 21.2635   2
  -2 -10   4 295.621 27.7172   3
   2  10  -3 189.622 21.3048   3
  -2 -10   3 226.203 23.4997   3
  -2  10   3 215.993 14.4206   3
  -2  10   2 293.389 19.9491   3
  -2 -10   2 302.355 26.3092   3
   2  10  -2 287.374 25.5480   3
   2  10  -1 12.3444 6.73763   3
  -2  10   1 11.0182 4.92911   3
   2  10  -1 7.55359 3.96533   2
  -2 -10   1 8.92199 2.10744   3
   2  10   0 113.939 14.3841   3
  -2  10   0 110.004 14.6783   3
  -2 -10   0 104.105 13.9052   3
   2  10   0 140.332 18.5160   2
  -2 -10  -1 2.73657 4.27381   3
   2  10   1 3.26407 3.58642   3
   2  10   1 4.08145 6.07121   2
  -2  10  -1 9.66110 7.89053   3
   2  10   2 10.5819 5.26998   3
  -2 -10  -2 0.17918 6.69441   3
   2  10   2 2.99647 4.53394   2
  -2  10  -2 9.32401 8.53073   3
   2  10   3 18.6859 4.67780   3
  -2 -10  -3 19.9499 5.10354   3
   2  10   3 16.5713 4.60562   2
  -2  10  -3 17.3601 5.02874   3
   2  10   4 83.2932 14.9353   2
  -2  10  -4 78.2432 16.1170   3
  -2  10  -5 134.038 20.9391   3
   2  10   5 122.503 17.3214   2
   2  10   6 259.328 24.6954   2
   2  10   6 262.777 23.2487   1
  -2  10  -6 250.781 30.8341   3
   2  10   7 387.212 30.9037   2
   2  10   7 278.093 24.0906   1
  -2  10  -7 340.983 34.6641   3
   2  10   8 293.363 24.6726   1
   2  10   8 307.497 31.2453   2
  -2  10  -8 314.973 36.0211   3
  -2  10  -9 205.261 29.1515   3
   2  10   9 188.394 24.9282   2
   2  10  10 141.449 26.2126   2
  -2  10 -10 95.4454 21.3364   3
   2  10  11 72.8850 15.2074   2
  -2  10 -11 80.0068 17.7058   3
   2  10  12 14.3567 7.37628   2
  -2  10 -12 23.2775 12.5311   3
   2  10  13 38.4770 19.5868   2
  -2  10 -13 10.7409 7.95584   3
  -2  10 -14 24.9935 14.4838   3
  -2  10 -15 21.7548 17.4240   3
   2  11 -15 22.8755 18.6410   3
   2  11 -14 28.9729 19.0226   3
   2  11 -13 2.70705 13.2359   3
   2  11 -12 155.051 27.5473   3
   2  11 -11-2.87359 7.04788   3
   2  11 -10 275.921 36.4272   3
   2  11  -9-8.78630 12.7056   3
  -2  11   9 4.84920 3.55637   2
  -2  11   8 563.252 30.1744   2
   2  11  -8 470.722 42.8224   3
   2  11  -7 1.19667 5.72678   3
  -2  11   7 9.87211 5.99732   2
  -2  11   6 274.086 20.6339   2
   2  11  -6 254.955 29.2925   3
   2  11  -5-2.82912 6.65265   3
  -2  11   5-0.00868 4.59226   2
  -2  11   4 22.1824 7.64457   2
   2  11  -4 22.0319 7.05952   3
   2  11  -3 3.93993 5.56976   3
  -2 -11   3-6.14846 8.18583   3
  -2  11   3-0.47829 1.88069   3
  -2 -11   2 47.1812 9.73188   3
   2  11  -2 56.6368 11.6432   3
  -2  11   2 65.3694 10.4607   3
  -2  11   1-2.56352 3.71527   3
   2  11  -1 1.66746 5.11163   3
  -2 -11   1 2.08136 3.26158   3
   2  11  -1-0.47677 6.53386   2
   2  11   0 207.077 24.1435   2
  -2  11   0 215.022 21.9769   3
  -2 -11   0 227.160 21.0760   3
   2  11   0 205.825 19.7756   3
   2  11   1 4.25773 4.26181   3
  -2 -11  -1 13.4560 6.36107   3
   2  11   1 7.64361 11.1028   2
  -2  11  -1 7.51342 6.30890   3
   2  11   2 552.259 27.9690   3
   2  11   2 470.753 36.3245   2
  -2  11  -2 567.073 38.7992   3
  -2  11  -3 0.90449 5.75238   3
   2  11   3 2.82556 6.78555   2
   2  11   3 7.24158 4.27116   3
  -2  11  -4 514.497 40.0460   3
   2  11   4 517.181 37.6441   2
   2  11   5 1.46297 4.21679   2
  -2  11  -5-3.90815 5.72343   3
  -2  11  -6 177.518 24.2300   3
   2  11   6 212.992 22.7558   2
  -2  11  -7 5.38395 10.6898   3
   2  11   7 11.9522 8.52436   2
  -2  11  -8-1.94577 4.29011   3
   2  11   8 8.44887 9.26083   2
   2  11   9 16.3137 10.7591   2
  -2  11  -9 12.3978 10.3127   3
  -2  11 -10 26.2523 8.05742   3
   2  11  10 51.7058 15.4622   2
  -2  11 -11 39.5660 11.6186   3
   2  11  11 43.4330 8.23683   2
  -2  11 -12 122.988 29.0568   3
   2  11  12 113.832 25.8107   2
  -2  11 -13 32.5921 17.0630   3
  -2  11 -14 157.141 33.8796   3
   2  12 -14 110.511 22.6220   3
   2  12 -13 77.9617 24.9554   3
   2  12 -12 133.433 26.4230   3
   2  12 -11 33.2114 18.1969   3
   2  12 -10 93.2757 22.3918   3
   2  12  -9 20.4070 13.9063   3
   2  12  -8 2.12149 7.59061   3
   2  12  -7 157.771 25.0471   3
  -2  12   7 146.241 16.4013   2
  -2  12   6 3.56208 2.68004   2
   2  12  -6-1.91546 8.93024   3
  -2  12   5 290.761 23.1253   2
   2  12  -5 285.418 31.8048   3
   2  12  -4 16.3337 11.9237   3
  -2  12   4 25.4775 10.4682   2
  -2  12   3 441.777 21.5829   3
   2  12  -3 431.571 35.5665   3
  -2  12   3 422.272 31.9934   2
  -2  12   2 39.4386 7.19463   3
   2  12  -2 39.7373 8.78188   3
   2  12  -1 383.727 35.6610   2
   2  12  -1 435.657 31.8071   3
  -2  12   1 401.174 28.2489   3
   2  12   0 15.0812 7.55027   3
  -2  12   0 26.3961 10.4579   3
   2  12   0 30.5999 11.5629   2
   2  12   1 185.410 26.1700   2
  -2  12  -1 180.764 19.7706   3
   2  12   1 180.678 17.1044   3
   2  12   2 2.81523 5.54550   3
  -2  12  -2-10.9289 6.08344   3
   2  12   2 6.46961 8.84092   2
  -2  12  -3 0.97785 7.55809   3
   2  12   3-1.33492 3.65891   2
   2  12   4 40.7058 12.0114   2
  -2  12  -4 26.2744 9.04279   3
   2  12   5 103.231 17.2049   2
  -2  12  -5 77.5653 17.1915   3
  -2  12  -6 114.230 22.5217   3
   2  12   6 110.337 17.3913   2
  -2  12  -7 196.613 28.5955   3
   2  12   7 222.944 27.3263   2
   2  12   8 141.688 23.1072   2
  -2  12  -8 110.674 22.2761   3
  -2  12  -9 212.745 33.5546   3
   2  12   9 166.882 26.7758   2
  -2  12 -10 31.0139 15.0119   3
   2  12  10 15.0956 14.2631   2
  -2  12 -11 102.672 28.2711   3
  -2  12 -12-0.91993 4.30158   3
  -2  12 -13-1.44095 9.92740   3
   2  13 -13 4.68865 9.34550   3
   2  13 -12-5.91900 14.0370   3
   2  13 -11 105.959 22.3519   3
   2  13 -10-3.84937 9.60656   3
   2  13  -9 187.403 30.7870   3
   2  13  -8 5.71573 6.95829   3
   2  13  -7 202.257 28.4496   3
   2  13  -6 58.3738 16.0714   3
  -2  13   6 66.0282 12.8004   2
  -2  13   5 89.1249 14.5627   2
   2  13  -5 46.9731 11.7547   3
   2  13  -4 12.0819 8.65955   3
  -2  13   4 3.19108 6.92522   2
   2  13  -3 17.0816 10.4477   3
  -2  13   3 5.19874 9.20067   2
   2  13  -2 5.51318 6.16319   2
   2  13  -2 16.3961 9.59431   3
  -2  13   1 254.358 23.4004   3
   2  13  -1 241.342 24.1601   3
   2  13  -1 227.498 29.6291   2
   2  13   0 19.3092 14.6068   2
  -2  13   0 10.2297 10.1599   3
   2  13   0 5.86115 5.34710   3
   2  13   1 402.527 27.2184   3
   2  13   1 340.609 34.5055   2
  -2  13  -1 358.621 32.5303   3
  -2  13  -2-5.25141 8.73628   3
   2  13   2 1.02887 11.0888   2
   2  13   3 208.600 26.6638   2
  -2  13  -3 192.456 25.8423   3
   2  13   4 8.17476 9.68846   2
  -2  13  -4 3.71398 8.84709   3
   2  13   5 202.407 23.7930   2
  -2  13  -5 142.478 23.4483   3
  -2  13  -6-41.0289 13.0313   3
   2  13   6-8.08854 2.78543   2
   2  13   7 40.8244 15.2903   2
  -2  13  -7 42.4209 17.5632   3
   2  13   8 19.2130 6.92651   2
  -2  13  -8 10.3546 13.2794   3
  -2  13  -9 6.50070 7.43586   3
   2  13   9 26.0710 12.4291   2
  -2  13 -10 47.7788 16.2056   3
  -2  13 -11 118.615 28.0182   3
  -2  13 -12 45.3208 21.3223   3
   2  14 -12 64.1008 20.7089   3
   2  14 -11 10.5266 9.46534   3
   2  14 -10-9.84417 16.4336   3
   2  14  -9 7.15802 12.6461   3
   2  14  -8 99.4031 22.0332   3
   2  14  -7 15.6514 8.64420   3
   2  14  -6 253.114 32.8017   3
   2  14  -5 26.7113 11.4309   3
  -2  14   4 478.632 35.1142   2
   2  14  -4 504.400 43.5342   3
   2  14  -3 41.4832 11.7125   3
   2  14  -3 37.3564 14.3278   2
  -2  14   3 64.9715 12.2002   2
   2  14  -2 531.350 48.5456   2
   2  14  -2 628.733 43.9690   3
  -2  14   2 571.988 42.2119   2
   2  14  -1 20.4582 12.1855   2
   2  14   0 292.569 33.6842   2
   2  14   1 3.16880 4.55448   2
   2  14   2 44.0781 10.7934   2
  -2  14  -2 30.9393 8.75471   3
   2  14   3 14.2578 10.5824   2
  -2  14  -3 7.01137 12.5484   3
  -2  14  -4 1.34728 5.68547   3
   2  14   4-2.10236 9.26454   2
  -2  14  -5 8.66866 4.79620   3
   2  14   5 10.8517 4.65038   2
  -2  14  -6 74.5686 18.2138   3
   2  14   6 78.5558 18.3754   2
   2  14   7 53.4254 14.0003   2
  -2  14  -7 51.9702 17.7601   3
  -2  14  -8 129.570 28.9714   3
  -2  14  -9-1.84680 10.4507   3
  -2  14 -10 99.1001 27.2525   3
  -2  14 -11 26.3952 10.0133   3
   2  15 -11 42.0234 15.1368   3
   2  15 -10 123.720 27.0751   3
   2  15  -9 30.8269 15.7847   3
   2  15  -8 143.610 26.6875   3
   2  15  -7 24.9420 11.1149   3
   2  15  -6 76.8462 15.5610   3
   2  15  -5 12.7403 8.11705   3
   2  15  -4 51.3882 14.8352   2
  -2  15   3 8.80523 3.28036   2
   2  15  -3-0.67330 7.09272   2
  -2  15   2 21.4512 8.59012   2
   2  15  -2 9.40733 14.3260   2
   2  15  -1-12.1219 8.87595   2
  -2  15   1 3.24326 11.3671   2
   2  15   0 79.2949 21.6173   2
   2  15   1 8.88572 6.25710   2
   2  15   2 130.159 22.0579   2
   2  15   3 47.3204 16.3370   2
   2  15   4 106.510 19.7265   2
   2  15   5 25.2120 12.3624   2
  -2  15  -5 51.2636 19.5834   3
  -2  15  -6 2.90595 14.2971   3
  -2  15  -7 14.7940 13.6493   3
  -2  15  -8-1.02031 15.4630   3
  -2  15  -9-1.90208 15.6137   3
  -2  15 -10 24.7871 9.85353   3
   2  16  -9-29.5824 12.6792   3
   2  16  -5 195.077 35.2251   2
   2  16  -4 12.7860 9.33056   2
   2  16  -3 338.933 42.7030   2
   2  16  -2 12.9132 13.1355   2
  -2  16   1 311.836 36.5847   2
   2  16  -1 313.279 38.3410   2
  -2  16   0 5.73491 7.36798   2
   2  16   0 31.5044 13.3490   2
   2  16   1 94.3653 21.9179   2
   2  16   2 1.59012 8.88004   2
   2  16   3-1.78939 6.16083   2
   2  17  -1-1.76582 9.80478   2
   2  17   0 55.8315 22.1738   2
   2  17   1 52.9552 12.6281   2
   3   0 -23 3.63895 14.7909   3
   3   0 -22 52.3565 24.0775   3
   3   0 -21-5.84655 5.36682   3
   3   0 -20 141.782 24.7208   3
   3   0 -19 4.30744 14.2874   3
   3   0 -18 6.37712 6.97683   3
   3   0 -17 2.40772 7.56926   3
   3   0 -17 14.8301 8.68365   2
   3   0 -16 31.1823 10.4521   2
   3   0 -16 55.8483 15.8622   3
   3   0 -15-0.78121 4.64791   2
   3   0 -15-3.32389 7.83664   3
   3   0 -14 460.333 38.0333   3
   3   0 -14 385.834 37.6620   2
   3   0 -13-2.26665 4.51557   3
  -3   0  13-5.12084 6.31518   3
   3   0 -13-2.91336 5.98832   2
   3   0 -12 803.418 45.9712   3
  -3   0  12 934.319 47.1633   3
   3   0 -11-1.04441 1.15271   1
   3   0 -11-1.32347 7.21839   2
   3   0 -11-4.92360 6.59825   3
  -3   0  11-0.33454 2.56036   3
   3   0 -10 1353.88 56.6812   3
  -3   0  10 1412.51 55.5559   3
   3   0 -10 1416.27 39.2027   1
   3   0  -9-4.62789 5.82347   3
  -3   0   9 1.01186 4.96843   3
  -3   0   8 1124.17 45.3971   3
   3   0  -8 1195.72 47.4337   3
   3   0  -7-1.35151 4.01052   3
  -3   0   7-2.88323 2.67770   3
  -3   0   6 633.084 29.4887   3
   3   0  -6 666.187 30.3905   3
   3   0  -5-1.91316 2.20967   3
  -3   0   5 1.29581 2.52653   3
  -3   0   4 100.031 9.93006   3
   3   0  -4 119.487 8.26598   2
   3   0  -4 102.487 10.2716   3
  -3   0   3-1.43878 1.37956   2
  -3   0   3 1.35351 3.14378   3
   3   0  -3-1.11972 1.91588   3
   3   0  -3 0.30849 1.97245   2
   3   0  -2 1410.20 40.9357   3
   3   0  -2 1454.82 36.1920   2
  -3   0   2 1320.53 38.8847   3
  -3   0   2 1349.97 34.8501   2
  -3   0   1-0.77988 1.76326   2
   3   0  -1-0.23445 2.31581   2
   3   0  -1 1.26547 4.31061   3
  -3   0   1 4.34453 3.09295   3
  -3   0   0 1870.50 48.2413   2
   3   0   0 1761.03 51.7077   2
  -3   0  -1 5.67759 5.99608   2
   3   0   1 12.9488 7.79292   2
  -3   0  -2 347.350 22.9995   2
   3   0   2 371.905 23.9460   2
  -3   0  -3 7.21418 5.95697   2
   3   0   3 5.27812 6.38244   2
   3   0   4 1558.05 61.5122   2
  -3   0  -4 1589.25 61.3804   2
  -3   0  -5 64.9137 17.1560   2
   3   0   5 36.3599 15.4542   2
   3   0   6 60.0252 14.1862   2
  -3   0  -6 82.4777 16.0170   2
  -3   0  -7 70.2294 20.2872   2
   3   0   8 6.91533 5.89128   2
  -3   0  -8-1.48745 6.48810   2
  -3   0  -9 8.26523 11.8258   2
   3   0   9-5.00518 5.10355   2
  -3   0 -10 159.278 22.8597   2
   3   0  10 113.181 22.6293   2
  -3   0 -11 10.1230 7.54932   2
   3   0  11 0.56415 10.2672   2
  -3   0 -12 454.424 40.5276   3
   3   0  12 467.075 47.5158   2
  -3   0 -13-4.68901 6.03788   3
  -3   0 -14 202.303 28.6934   3
   3   0  14 202.640 21.0546   1
  -3   0 -15-3.85530 4.62505   3
   3   0  15 7.05014 8.00818   1
   3   0  16 23.3693 9.78149   1
  -3   0 -16-2.43780 10.0197   3
  -3   0 -17-9.55396 16.6837   3
  -3   0 -18 38.0254 15.7807   3
  -3   0 -19-5.81938 8.53805   3
  -3   0 -20 68.6260 22.6381   3
  -3   0 -21 14.7464 22.7283   3
   3  -1 -23 27.4794 18.5866   3
   3   1 -23 13.0928 18.0232   3
   3   1 -22-3.08143 18.5894   3
   3  -1 -22 2.65629 14.8347   3
   3   1 -21 15.4314 12.3190   3
   3  -1 -21 10.8628 7.87278   3
   3   1 -20 26.4019 12.0995   3
   3  -1 -20 34.7230 13.3392   3
   3  -1 -19 106.422 20.7828   3
   3   1 -19 81.5369 18.8768   3
   3  -1 -18 216.724 28.5046   3
   3   1 -18 205.888 29.9892   3
   3   1 -17 194.842 27.7464   3
   3  -1 -17 206.655 27.4019   3
   3  -1 -17 147.869 25.7891   2
   3  -1 -16 264.227 29.7360   3
   3  -1 -16 266.835 31.3139   2
   3   1 -16 178.694 26.2178   2
   3   1 -16 307.193 34.9284   3
   3  -1 -15 92.0998 17.9532   2
   3   1 -15 113.637 21.0645   3
   3  -1 -15 109.006 18.8959   3
   3   1 -15 63.2907 6.86205   2
   3  -1 -14 312.899 29.6814   3
  -3   1  14 342.885 29.8119   3
   3   1 -14 379.400 35.1848   3
   3  -1 -14 323.899 35.6683   2
   3   1 -13 190.518 24.3995   3
  -3   1  13 193.041 21.8456   3
   3  -1 -13 169.248 21.0157   2
   3  -1 -13 199.468 22.2608   3
  -3  -1  13 215.068 24.5419   3
   3   1 -12 448.805 35.7008   3
   3  -1 -12 441.900 32.3077   3
   3   1 -12 485.113 24.4774   1
  -3  -1  12 454.433 34.4923   3
  -3   1  12 424.714 31.1636   3
   3  -1 -12 353.361 32.3449   2
   3   1 -11 71.7570 14.2793   3
  -3   1  11 76.0660 13.3756   3
   3   1 -11 70.1953 8.30883   1
  -3  -1  11 66.9363 11.9169   3
   3  -1 -11 53.8931 10.7649   3
   3  -1 -11 86.7720 13.5932   2
   3  -1 -10 249.808 11.6253   1
   3   1 -10 281.814 25.9697   3
  -3  -1  10 319.188 25.6536   3
   3  -1 -10 280.332 23.0671   3
   3   1 -10 305.469 18.0845   1
  -3   1  10 303.862 23.1809   3
   3  -1  -9 133.954 15.2219   3
   3   1  -9 134.145 17.1085   3
  -3  -1   9 160.232 17.5518   3
   3  -1  -9 23.4417 8.44600   2
  -3   1   9 144.398 15.7058   3
   3  -1  -8 19.5069 4.98371   3
  -3   1   8 15.2805 4.68909   3
  -3  -1   8 21.8782 6.63741   3
   3   1  -8 14.5247 6.43491   3
   3  -1  -7 309.712 20.1322   3
  -3   1   7 288.747 19.3647   3
   3   1  -7 311.571 22.5722   3
  -3  -1   7 301.499 22.7667   3
   3  -1  -6 3.01293 2.92926   3
  -3   1   6-0.77998 2.11171   3
   3   1  -6 1.43192 3.08388   3
  -3  -1   6 2.52506 2.63375   3
  -3  -1   5 969.451 38.3308   3
   3  -1  -5 1030.88 25.5065   2
   3  -1  -5 973.563 34.2452   3
   3   1  -5 975.495 38.0409   3
  -3   1   5 962.629 34.0311   3
  -3   1   4 488.826 21.6926   3
   3  -1  -4 499.347 21.8637   3
   3  -1  -4 503.152 15.7115   2
  -3  -1   4 481.408 24.3111   3
   3   1  -4 512.886 24.8200   3
  -3  -1   3 238.006 15.7473   3
   3   1  -3 246.535 14.3053   2
   3  -1  -3 276.510 12.2357   2
  -3   1   3 229.739 13.7127   3
   3  -1  -3 258.033 15.2664   3
  -3   1   3 244.700 10.4095   2
   3   1  -3 246.859 16.1216   3
   3   1  -2 333.816 17.1917   2
  -3   1   2 388.148 18.2162   3
   3  -1  -2 401.545 18.9704   3
   3  -1  -2 427.754 18.3566   2
  -3  -1   2 361.996 17.1901   2
  -3  -1   2 367.435 18.5396   3
  -3   1   2 390.780 14.9464   2
   3   1  -2 376.225 19.5153   3
   3  -1  -1 47.6819 8.32305   2
   3   1  -1 54.9915 8.14239   3
  -3  -1   1 41.6584 5.69132   3
  -3   1   1 42.9923 5.56545   2
   3   1  -1 41.0837 6.66766   2
  -3   1   1 42.6603 6.59869   3
  -3  -1   1 41.6756 5.23374   2
  -3   1   0 25.1648 7.42341   2
   3   1   0 15.1393 5.40142   2
   3  -1   0 19.0600 5.88489   2
  -3  -1   0 22.0844 5.70999   2
  -3  -1   0 10.6867 4.13140   3
  -3   1  -1 54.4333 9.02159   2
  -3  -1  -1 68.6631 7.66314   2
   3  -1   1 55.6932 8.96954   2
   3   1   1 53.1192 8.79445   2
  -3   1  -2 5.30716 5.68231   2
   3   1   2 12.0125 6.73945   2
  -3  -1  -2 9.17321 4.18261   2
   3  -1   2 7.48997 4.14067   2
  -3  -1  -3 335.837 22.0646   2
  -3   1  -3 397.963 26.5586   2
   3  -1   3 401.349 28.6771   2
   3   1   3 412.633 29.7419   2
  -3  -1  -4 235.825 19.9238   2
   3   1   4 224.977 21.5048   2
   3  -1   4 240.666 23.0064   2
  -3   1  -4 235.267 22.4301   2
   3  -1   5 1494.08 65.2279   2
   3   1   5 1501.55 62.9697   2
  -3   1  -5 1470.35 61.6620   2
  -3  -1  -5 1587.21 59.7861   2
  -3  -1  -6 557.660 36.5165   2
   3  -1   6 556.680 39.8829   2
  -3   1  -6 525.871 37.8595   2
   3   1   6 575.035 39.0070   2
   3  -1   7 754.800 49.9400   2
   3   1   7 794.272 50.0205   2
  -3  -1  -7 748.739 46.5202   2
  -3   1  -7 736.424 47.7202   2
   3   1   8 292.572 29.4869   2
   3  -1   8 283.522 33.0946   2
  -3  -1  -8 321.286 31.1663   2
  -3   1  -8 307.854 29.7540   2
   3   1   9 365.902 36.2281   2
  -3   1  -9 391.496 35.4612   2
   3  -1   9 337.719 37.7238   2
  -3  -1  -9 610.060 49.6705   2
  -3   1 -10 100.786 20.0979   2
  -3  -1 -10 97.1189 22.7648   2
   3   1  10 82.8142 18.7594   2
   3  -1  10 88.1577 20.0594   2
   3   1  11 109.571 23.0395   2
  -3  -1 -11 109.733 26.6363   2
  -3   1 -11 83.7561 16.3167   3
  -3   1 -12 6.21195 4.01322   3
  -3  -1 -12 4.38615 4.66081   3
   3   1  12 8.49831 5.38162   2
  -3   1 -13-2.04415 3.90932   3
   3  -1  13-6.60119 6.03794   1
  -3  -1 -13-3.14557 7.83067   3
   3   1  13-5.38315 14.2974   2
   3  -1  14 91.4296 14.2154   1
  -3  -1 -14 64.2286 15.2475   3
  -3   1 -14 65.1456 12.4857   3
  -3   1 -15 80.5163 23.0171   3
  -3  -1 -15 106.298 39.8837   3
   3   1  15 102.986 12.7422   1
   3  -1  15 108.148 15.4383   1
   3  -1  16 240.720 23.4413   1
  -3  -1 -16 169.258 26.7407   3
  -3   1 -16 146.830 25.8077   3
  -3   1 -17 112.614 22.4035   3
  -3  -1 -17 115.621 21.4085   3
  -3  -1 -18 81.2451 20.8004   3
  -3   1 -18 98.1161 22.0452   3
  -3  -1 -19 165.172 28.4703   3
  -3   1 -19 140.792 26.7376   3
  -3  -1 -20 90.6074 20.2517   3
  -3   1 -20 109.360 26.7225   3
  -3  -1 -21 70.3804 22.8804   3
  -3   1 -21 95.0994 28.0185   3
   3  -2 -22-4.76748 8.73386   3
   3   2 -22 17.4071 14.8785   3
   3  -2 -21 125.944 22.4637   3
   3   2 -21 180.388 31.6988   3
   3   2 -20 43.4105 15.1928   3
   3  -2 -20 28.2427 5.71857   3
   3   2 -19 68.7592 19.1732   3
   3  -2 -19 89.6055 18.8237   3
   3  -2 -18-1.81797 7.99434   3
   3   2 -18 4.94733 10.3929   3
   3  -2 -17 12.6143 12.7529   3
   3  -2 -17 4.30309 5.00346   2
   3   2 -17-5.28818 10.2673   3
   3  -2 -16-1.57798 9.26430   2
   3  -2 -16 7.96945 6.28834   3
   3   2 -16-2.81163 5.90756   3
   3   2 -15 104.225 20.0684   3
   3  -2 -15 100.713 16.1641   3
   3  -2 -15 112.945 17.6846   2
   3  -2 -14 9.86391 5.56710   2
   3   2 -14 27.0340 12.8483   3
   3   2 -14-0.31816 12.3555   2
   3  -2 -14 6.70391 6.37470   3
  -3   2  13 324.926 28.1234   3
   3   2 -13 288.776 31.2361   3
   3   2 -13 397.283 24.1527   1
   3  -2 -13 348.152 29.7665   3
   3  -2 -13 379.148 30.5873   2
   3   2 -12-0.18028 2.03167   1
   3  -2 -12 0.84321 5.24496   2
   3   2 -12 6.16473 5.12294   3
   3  -2 -12 1.84887 2.35529   3
  -3   2  12-1.75288 4.76391   3
  -3  -2  12-4.66635 6.96965   3
   3  -2 -11 1197.92 49.7034   2
   3  -2 -11 1097.70 47.6318   3
   3   2 -11 1178.08 43.1506   1
  -3  -2  11 1118.13 54.7595   3
  -3   2  11 1030.36 45.8170   3
   3   2 -11 1103.97 57.0371   3
   3  -2 -10 120.242 14.1016   3
   3   2 -10 110.915 12.2018   1
   3   2 -10 113.155 16.7563   3
  -3  -2  10 148.510 18.8196   3
  -3   2  10 114.035 12.9613   3
   3  -2 -10 129.784 14.5174   2
   3  -2  -9 1207.28 41.5738   2
   3   2  -9 1131.41 52.8249   3
  -3   2   9 1117.39 43.3598   3
  -3  -2   9 1161.79 51.6303   3
   3  -2  -9 1162.74 43.7023   3
   3   2  -8 23.2423 7.41505   3
  -3  -2   8 11.0293 5.77285   3
   3  -2  -8 28.4449 6.49992   3
  -3   2   8 22.7467 5.94681   3
   3  -2  -8 29.6246 6.62381   2
   3  -2  -7 619.791 26.3353   3
  -3  -2   7 612.092 32.7782   3
   3   2  -7 647.866 34.6135   3
  -3   2   7 593.240 26.3500   3
   3  -2  -6 6.98252 2.16558   3
  -3   2   6 10.2376 2.42480   3
   3   2  -6 6.63809 5.96563   3
  -3  -2   6 13.1214 6.75294   3
   3   2  -5 170.011 15.4511   3
  -3  -2   5 170.615 15.9713   3
   3  -2  -5 173.186 12.1399   3
  -3   2   5 166.359 12.1791   3
  -3  -2   4 17.5747 5.51162   3
   3  -2  -4 18.2894 3.69878   3
   3   2  -4 17.1227 4.30099   3
  -3   2   4 24.6859 3.86809   3
  -3  -2   3 86.5128 10.0088   3
   3  -2  -3 84.0847 8.25441   3
   3   2  -3 87.9503 10.0402   3
  -3   2   3 86.5939 7.83725   3
   3   2  -3 91.3750 9.65445   2
  -3   2   3 91.7061 5.61741   2
   3  -2  -3 85.9071 7.34557   2
   3   2  -2-1.49339 3.19285   3
  -3   2   2 0.24427 1.82958   3
  -3   2   2 4.64571 4.10906   2
   3  -2  -2 0.30204 3.29981   2
   3   2  -2 5.41123 4.92354   2
  -3  -2   2 2.87939 2.05744   3
   3   2  -1 2484.59 62.0697   3
  -3  -2   1 2368.62 60.1684   2
   3  -2  -1 2467.89 64.6356   2
  -3  -2   1 2446.45 60.4182   3
   3   2  -1 2602.47 61.9257   2
  -3   2   1 2521.54 63.3260   2
   3   2   0 610.525 24.7984   3
   3   2   0 521.921 23.8535   2
   3  -2   0 601.466 29.1724   2
  -3   2   0 581.567 26.9956   2
  -3  -2   0 418.886 21.5189   2
  -3  -2   0 580.633 23.6813   3
   3   2   1 593.321 27.2060   2
   3  -2   1 630.696 31.7926   2
  -3  -2  -1 576.566 24.8630   3
  -3  -2  -1 520.834 24.0946   2
  -3   2  -1 618.437 30.1260   2
  -3   2  -2 36.0484 7.45988   2
  -3  -2  -2 45.8208 6.91979   3
   3   2   2 43.7779 7.40404   2
  -3  -2  -2 41.5879 7.08004   2
   3  -2   2 37.6679 8.23617   2
  -3  -2  -3 800.509 32.6611   2
  -3   2  -3 735.537 39.1432   2
   3   2   3 845.507 39.8029   2
   3  -2   3 770.125 42.5998   2
  -3   2  -4 27.3576 11.8568   2
   3  -2   4 37.3456 12.8032   2
   3   2   4 24.1475 10.7602   2
  -3  -2  -4 18.9546 6.31892   2
  -3  -2  -5 969.815 43.4522   2
   3  -2   5 1084.22 58.0135   2
  -3   2  -5 1038.61 52.7398   2
   3   2   5 1099.88 53.6522   2
   3   2   6 89.0717 15.9915   2
  -3  -2  -6 67.5685 11.6822   2
  -3   2  -6 81.4779 16.3896   2
   3  -2   6 75.8571 17.6976   2
  -3  -2  -7 12.4835 6.75011   2
  -3   2  -7 20.1799 11.1331   2
   3  -2   7 4.72521 13.0669   2
   3   2   7 20.5885 10.1920   2
  -3  -2  -8 339.396 28.9388   2
   3   2   8 349.610 34.2372   2
  -3   2  -8 402.829 35.9608   2
   3   2   9 46.2595 13.0681   2
  -3  -2  -9 26.7622 9.55762   2
  -3   2  -9 35.9200 11.7942   2
  -3   2 -10 72.6795 16.6202   2
   3   2  10 79.2896 15.5321   2
  -3  -2 -10 85.7758 17.8977   2
  -3  -2 -11 342.867 31.7858   2
  -3   2 -11 270.143 31.6798   3
   3   2  11 292.988 33.6138   2
   3  -2  12 15.9843 7.40720   1
  -3  -2 -12 22.1269 7.16892   3
  -3   2 -12 16.1591 6.07426   3
   3   2  12-1.15706 14.0592   2
  -3   2 -13 214.416 30.1069   3
  -3  -2 -13 234.432 28.4568   3
   3   2  13 216.636 33.9072   2
   3  -2  13 275.588 25.4556   1
   3  -2  14 105.059 16.0590   1
  -3  -2 -14 84.4543 17.3998   3
  -3   2 -14 88.8338 17.9329   3
   3   2  14 81.0698 23.9127   2
   3   2  15 58.7494 10.7638   1
  -3  -2 -15 72.2241 16.3008   3
  -3   2 -15 48.7976 14.4248   3
   3   2  15 50.6067 19.3017   2
   3  -2  15 71.3613 13.9331   1
  -3   2 -16-2.19856 6.14761   3
   3  -2  16 12.9605 9.46978   1
  -3  -2 -16 15.1871 9.71426   3
  -3   2 -17-1.63680 10.6777   3
   3  -2  17 9.94795 2.69667   1
  -3  -2 -17-5.24191 6.09316   3
  -3   2 -18-0.17675 11.4844   3
  -3  -2 -18 4.32149 7.75749   3
  -3   2 -19 23.6517 11.2423   3
  -3  -2 -19 60.0762 26.5753   3
  -3  -2 -20-11.2733 16.9210   3
  -3   2 -20-4.43873 11.6638   3
  -3  -2 -21 149.476 34.0606   3
   3   3 -22-0.99987 8.29943   3
   3   3 -21 2.46317 8.63496   3
   3  -3 -21 6.26651 5.53526   3
   3  -3 -20 27.0021 10.5699   3
   3   3 -20 26.9933 6.84721   3
   3  -3 -19 38.5772 4.60921   3
   3   3 -19 70.3311 21.2746   3
   3   3 -18 174.933 28.2330   3
   3  -3 -18 227.377 27.2959   3
   3   3 -17 115.037 24.3702   3
   3  -3 -17 114.860 20.5714   3
   3   3 -16 264.172 33.3747   3
   3  -3 -16 289.940 28.7086   3
   3  -3 -16 250.266 26.6085   2
   3   3 -15 340.769 38.2849   3
   3  -3 -15 386.062 30.8428   3
   3  -3 -15 369.085 31.8416   2
   3   3 -14 373.133 37.8415   3
   3  -3 -14 531.822 36.6161   2
   3  -3 -14 387.773 30.1724   3
   3  -3 -13 111.576 15.3632   3
   3   3 -13 97.9844 17.9232   3
   3  -3 -13 139.666 17.3163   2
   3   3 -13 133.605 16.1037   1
   3  -3 -12 78.0472 11.0832   3
   3   3 -12 81.0709 17.1776   3
   3  -3 -12 89.3080 11.4574   2
   3   3 -12 94.6367 13.5139   1
  -3   3  12 97.3028 12.9871   3
   3  -3 -11 72.1955 10.4582   2
   3  -3 -11 49.2972 8.68969   3
   3   3 -11 70.7601 9.73719   1
   3   3 -11 60.7706 12.4929   3
  -3  -3  11 68.4990 12.6496   3
  -3   3  11 57.8204 9.69601   3
   3  -3 -10 16.4669 4.61708   3
   3  -3 -10 35.8720 6.88269   2
   3   3 -10 14.3544 2.97365   3
  -3  -3  10 22.7798 6.93840   3
  -3   3  10 17.6621 3.60290   3
   3   3 -10 12.6948 4.26425   1
   3   3  -9 22.1158 10.6467   3
   3  -3  -9 12.8805 5.01247   3
  -3  -3   9 4.58019 3.72160   3
   3  -3  -9 15.5955 4.27149   2
  -3   3   9 13.4206 5.16298   3
   3   3  -9 7.71920 4.35068   1
  -3  -3   8 792.007 41.5246   3
  -3   3   8 734.873 30.7110   3
   3   3  -8 761.160 41.8312   3
   3  -3  -8 776.052 30.6478   3
   3  -3  -7 2.46231 1.63726   3
   3   3  -7 0.25030 5.12637   3
  -3   3   7 1.45637 1.98440   3
  -3  -3   7 3.55999 4.02145   3
  -3   3   6 668.996 25.3260   3
   3   3  -6 641.551 35.0512   3
  -3  -3   6 629.978 34.7801   3
   3  -3  -6 671.942 25.3719   3
  -3   3   5 542.923 21.7759   3
  -3  -3   5 613.253 31.3173   3
   3  -3  -5 586.247 23.0127   3
   3   3  -5 546.031 30.5341   3
   3   3  -4 822.084 35.6940   3
  -3  -3   4 809.507 36.0793   3
  -3   3   4 819.293 26.3623   3
  -3  -3   3 28.6688 6.19345   3
   3   3  -3 27.1206 6.55689   3
  -3   3   3 30.8493 3.16699   2
  -3   3   3 22.8159 4.26354   3
  -3  -3   2 954.231 35.2716   3
  -3   3   2 948.430 31.5090   2
   3   3  -2 929.101 35.6415   3
   3   3  -2 863.243 34.1427   2
  -3  -3   1 121.888 11.3528   3
   3   3  -1 113.948 11.1669   2
  -3   3   1 137.189 12.3878   2
   3   3  -1 140.173 12.2415   3
  -3  -3   0 649.820 26.7671   3
   3   3   0 720.776 28.5542   3
  -3  -3   0 699.353 29.6059   2
   3   3   0 701.834 29.9357   2
  -3   3   0 707.416 33.2848   2
  -3  -3  -1 821.751 32.0234   2
  -3  -3  -1 769.717 28.8900   3
   3   3   1 687.769 30.5034   2
  -3   3  -1 752.732 35.5365   2
   3   3   1 864.128 31.1337   3
  -3  -3  -2 88.0785 10.6227   2
  -3   3  -2 79.5676 12.3654   2
   3   3   2 81.8141 10.8480   2
  -3  -3  -2 94.3836 9.59245   3
  -3   3  -3 329.851 26.6485   2
  -3  -3  -3 348.212 21.1404   2
  -3  -3  -3 332.000 19.1398   3
   3   3   3 321.712 23.4236   2
   3   3   4 597.493 34.2806   2
  -3  -3  -4 595.701 28.5935   2
  -3   3  -4 585.559 37.2015   2
  -3  -3  -5 195.782 16.2263   2
  -3   3  -5 191.005 23.1404   2
   3   3   5 219.012 22.6882   2
   3   3   6 1501.63 65.5310   2
  -3   3  -6 1483.98 65.3931   2
   3   3   7 169.286 23.6695   2
  -3  -3  -7 203.939 19.2345   2
  -3   3  -7 153.974 18.9144   2
  -3  -3  -8 173.400 18.8711   2
  -3   3  -8 197.709 26.7039   2
   3   3   8 174.046 23.5204   2
  -3  -3  -9 165.894 20.6887   2
   3   3   9 153.571 24.1886   2
  -3   3  -9 175.794 26.4162   2
   3  -3  10 71.8733 14.8200   1
  -3   3 -10 107.304 19.0809   3
   3   3  10 121.817 19.7654   2
  -3  -3 -10 93.6864 14.8976   2
   3  -3  11 3.68853 3.72533   1
  -3   3 -11 1.45119 4.12782   3
  -3  -3 -11 8.82051 4.16317   2
   3   3  11 5.49381 8.11359   2
   3   3  12 11.5245 7.04507   2
   3  -3  12 36.8634 9.29108   1
  -3   3 -12 25.7937 5.65635   3
  -3  -3 -12 44.7024 15.6755   2
  -3  -3 -12 52.2809 14.9485   3
   3  -3  13 17.6558 7.28211   1
  -3  -3 -13 5.77679 5.14822   3
  -3   3 -13 29.3463 12.2651   3
   3   3  13 13.0898 8.92939   2
  -3  -3 -14 31.7699 6.69437   3
  -3   3 -14 30.7650 13.9473   3
   3  -3  14 34.6514 11.2400   1
   3   3  14 22.8159 10.9287   2
  -3   3 -15 45.1263 18.7143   3
   3   3  15 57.8360 23.5231   2
  -3  -3 -15 61.0208 15.6603   3
   3  -3  15 36.7841 8.97115   1
  -3   3 -16 225.268 33.0217   3
  -3  -3 -16 250.366 32.7813   3
   3  -3  16 291.487 29.7355   1
   3   3  16 219.264 39.3474   2
  -3   3 -17 100.423 25.2557   3
   3  -3  17 125.780 20.2227   1
  -3  -3 -17 88.6683 19.8476   3
  -3  -3 -18 181.580 29.8140   3
  -3   3 -18 189.676 35.3872   3
  -3   3 -19 78.8576 25.5600   3
  -3  -3 -19 99.4887 21.5896   3
  -3   3 -20 50.9371 22.2084   3
  -3  -3 -20 94.5137 23.5848   3
   3   4 -21 64.6669 25.9465   3
   3   4 -20 87.5898 21.3041   3
   3  -4 -19 68.3621 15.6652   3
   3   4 -19 68.3344 22.2355   3
   3  -4 -18 74.3882 15.0182   3
   3   4 -18 43.9300 13.9940   3
   3   4 -17 25.3103 8.67952   3
   3  -4 -17 18.0856 7.80178   3
   3  -4 -16-1.33745 5.05150   3
   3   4 -16 1.81762 11.6065   3
   3  -4 -15 9.48383 2.76560   3
   3   4 -15 24.7562 14.6906   3
   3  -4 -15 7.73765 2.51734   2
   3  -4 -14 79.7675 14.2960   3
   3   4 -14 77.8797 12.4321   1
   3   4 -14 57.1070 15.3581   3
   3  -4 -14 54.2592 8.20107   2
   3   4 -13 4.68953 7.61809   3
   3  -4 -13 1.06415 2.70184   3
   3   4 -13 4.84512 5.73644   1
   3  -4 -12 349.500 23.4796   3
   3   4 -12 410.280 28.5780   1
   3   4 -12 327.246 33.6387   3
   3  -4 -11 47.9005 8.11396   3
   3   4 -11 49.5095 13.7397   3
   3   4 -11 48.8831 9.58748   1
   3  -4 -11 32.1636 4.11654   2
  -3   4  11 48.8140 9.71488   3
  -3  -4  10 819.175 46.6119   3
  -3   4  10 782.556 33.2920   3
   3   4 -10 847.910 41.3713   1
   3   4 -10 763.916 48.0625   3
   3  -4 -10 788.098 31.9803   3
  -3  -4   9 165.795 21.3098   3
   3   4  -9 159.332 21.1217   3
  -3   4   9 149.125 12.8962   3
   3  -4  -9 151.916 12.5162   3
   3   4  -9 156.625 16.7138   1
  -3  -4   8 600.600 36.6413   3
  -3   4   8 545.471 23.8655   3
   3   4  -8 576.837 36.9788   3
   3  -4  -8 566.212 20.8525   1
   3  -4  -8 607.714 24.1327   3
   3   4  -7 240.383 22.8462   3
  -3   4   7 241.551 14.1479   3
  -3  -4   7 237.837 21.6285   3
   3  -4  -7 221.029 13.5293   1
   3  -4  -7 244.812 14.1521   3
   3  -4  -6 126.048 9.79870   3
  -3   4   6 138.677 10.0491   3
  -3  -4   6 129.430 14.9514   3
   3   4  -6 131.154 15.8580   3
   3  -4  -6 119.772 10.1776   1
   3   4  -5-0.31239 3.05965   3
  -3  -4   5 2.16725 4.43217   3
  -3   4   5 1.95519 2.30106   3
  -3  -4   4 378.287 24.7177   3
  -3   4   4 397.082 15.8883   3
   3   4  -4 427.469 25.6366   3
   3   4  -3 14.4745 7.30563   3
  -3  -4   3 17.0899 4.38370   3
  -3   4   3 9.67018 2.75690   3
  -3   4   3 7.91901 2.59624   2
   3   4  -2 385.802 22.2717   3
   3   4  -2 343.036 21.5230   2
  -3   4   2 349.479 19.4741   2
  -3  -4   2 353.065 21.5577   3
  -3  -4   1 6.85782 2.84007   3
  -3   4   1 22.3231 8.05111   2
   3   4  -1 7.97722 6.10170   2
   3   4  -1 10.1394 6.21054   3
  -3  -4   0 2027.71 55.8707   3
   3   4   0 2193.39 57.2490   3
  -3   4   0 2204.05 65.9833   2
   3   4   0 1611.28 55.6301   2
  -3  -4  -1 6.65042 2.21669   3
   3   4   1 6.44969 3.79033   3
  -3  -4  -1 5.65373 4.03467   2
   3   4   1 7.67308 3.69973   2
  -3   4  -1 12.6150 5.25586   2
   3   4   2 1313.88 49.9605   2
  -3  -4  -2 1679.34 47.5195   3
  -3  -4  -2 1926.95 54.6152   2
  -3   4  -2 1846.38 65.3284   2
  -3   4  -3 38.3299 8.50446   2
   3   4   3 11.8166 6.49205   2
  -3  -4  -3 38.4430 6.35572   3
  -3  -4  -3 45.3280 7.45188   2
  -3  -4  -4 811.223 35.3911   2
   3   4   4 830.393 40.1707   2
  -3  -4  -4 776.777 30.7229   3
  -3   4  -4 730.487 44.4033   2
   3   4   5 12.3128 8.38297   2
  -3   4  -5 16.9484 11.6262   2
  -3  -4  -5 19.1577 6.25502   2
   3   4   6 76.7727 20.3799   2
  -3  -4  -6 69.1431 9.98083   2
  -3   4  -6 72.8404 18.1600   2
  -3   4  -7 50.7650 13.7795   2
   3   4   7 45.5990 11.3841   2
  -3  -4  -7 50.1643 8.36262   2
   3   4   8 31.4851 13.1668   2
  -3  -4  -8 33.8718 6.86451   2
  -3   4  -8 33.5677 13.5097   2
   3  -4   8 9.59315 6.69922   1
   3   4   9 169.840 23.0202   2
  -3  -4  -9 210.869 19.8861   2
   3  -4   9 157.993 23.5183   1
  -3   4  -9 171.238 22.6678   3
  -3  -4 -10 83.8414 14.0276   2
   3  -4  10 277.899 26.0421   1
   3   4  10 251.921 30.8861   2
  -3   4 -10 233.318 28.2646   3
  -3  -4 -11 116.048 17.9138   2
   3  -4  11 91.7031 16.1600   1
   3   4  11 109.912 22.9977   2
  -3   4 -11 100.649 19.6558   3
  -3   4 -12 365.994 39.4140   3
  -3  -4 -12 388.074 33.1215   3
   3  -4  12 371.685 31.3692   1
  -3  -4 -12 407.544 32.7201   2
   3   4  12 346.640 36.6797   2
   3  -4  13 196.896 21.8250   1
   3   4  13 214.001 31.8504   2
  -3  -4 -13 206.449 24.4932   3
  -3   4 -13 220.613 32.8079   3
   3  -4  14 237.179 27.1902   1
   3   4  14 265.999 37.2824   2
  -3  -4 -14 234.798 26.3458   3
  -3   4 -14 235.893 33.4940   3
   3  -4  15 141.544 19.2583   1
   3   4  15 156.792 31.6505   2
  -3   4 -15 152.939 28.4680   3
  -3  -4 -15 141.736 22.0599   3
  -3  -4 -16 63.0422 13.8566   3
  -3   4 -16 125.106 27.6871   3
   3   4  16 122.355 25.7579   2
   3  -4  16 129.405 21.4316   1
  -3  -4 -17 22.3827 5.16163   3
  -3   4 -17 37.5608 14.7027   3
   3   4  17 37.1803 19.3445   2
   3  -4  17 32.8578 11.1760   1
  -3  -4 -18-1.21754 7.22160   3
  -3   4 -18-10.0867 16.5517   3
  -3   4 -19 7.89557 12.5264   3
   3   5 -20 20.9875 11.4572   3
   3   5 -19 58.6024 21.1518   3
   3  -5 -18 28.2089 9.57329   3
   3   5 -18 18.7502 13.0894   3
   3   5 -17 128.121 23.4626   3
   3  -5 -17 148.083 19.6639   3
   3  -5 -16 83.2448 13.1401   3
   3   5 -16 91.2243 23.0765   3
   3  -5 -15 405.161 27.1082   3
   3   5 -15 384.990 41.5910   3
   3   5 -14 147.806 25.5328   3
   3   5 -14 187.772 20.8982   1
   3  -5 -14 154.251 15.3909   3
   3   5 -13 90.0008 18.7373   3
   3  -5 -13 100.937 12.0583   3
   3   5 -13 124.703 18.5337   1
   3  -5 -12 72.3336 9.93913   3
   3   5 -12 80.3040 13.8455   1
   3   5 -12 73.5799 16.8927   3
   3   5 -11 6.09271 9.88449   3
   3   5 -11 13.9627 9.27686   1
   3  -5 -11 6.93372 4.31908   3
   3  -5 -10 5.49359 2.55315   3
  -3   5  10 23.5126 5.44767   3
   3   5 -10-1.21994 3.85762   1
   3   5 -10 12.8560 7.66469   3
   3   5  -9 285.149 27.5969   3
  -3  -5   9 334.514 29.4032   3
  -3   5   9 266.125 15.4992   3
   3  -5  -9 304.985 16.2656   3
   3   5  -9 319.767 25.6159   1
  -3   5   8 10.8738 3.88342   3
   3  -5  -8 3.86846 1.11656   3
   3   5  -8 8.31987 5.98662   3
  -3  -5   8 4.96867 9.02564   3
   3   5  -8 1.41313 4.61704   1
   3  -5  -8 3.67449 1.41910   1
  -3  -5   7 852.891 44.7568   3
   3   5  -7 865.169 45.3308   3
   3  -5  -7 813.291 30.4166   1
  -3   5   7 751.607 24.9444   3
  -3   5   6 78.8995 6.55950   3
   3  -5  -6 86.4386 9.74963   1
  -3  -5   6 90.0894 13.3353   3
   3   5  -6 80.3552 13.1249   3
  -3  -5   5 1230.72 49.2501   3
  -3   5   5 1117.16 21.9186   2
   3   5  -5 1270.32 49.9432   3
   3  -5  -5 1261.77 40.2530   1
  -3   5   5 1175.88 27.1234   3
  -3   5   4 15.0688 2.80327   3
  -3   5   4 3.98943 1.92559   2
   3   5  -4 21.2277 6.65839   3
  -3  -5   4 12.5307 6.25549   3
   3  -5  -4 14.2015 4.50897   1
  -3  -5   3 1145.83 43.8184   3
   3  -5  -3 972.249 40.0628   1
   3   5  -3 1184.07 44.5178   3
   3  -5  -2 7.65690 3.53426   1
   3   5  -2 12.8232 6.72427   3
  -3  -5   2 0.82500 3.27021   3
  -3   5   2 4.78426 4.32524   2
   3   5  -2 4.35159 4.86123   2
  -3  -5   1 1141.74 41.7472   3
   3   5  -1 1264.61 42.9491   3
   3  -5  -1 822.243 41.4135   1
  -3   5   1 1149.59 46.6738   2
   3   5  -1 1265.87 47.1472   2
  -3  -5   0 7.08920 5.31298   3
   3   5   0 0.72282 2.29375   3
   3   5   0 5.63542 6.91320   2
  -3   5   0 15.4163 8.31448   2
  -3  -5  -1 182.881 14.2907   3
  -3   5  -1 189.351 20.0752   2
   3   5   1 216.088 16.1010   3
   3   5   1 196.561 17.5581   2
   3   5   2 141.970 15.4704   2
  -3  -5  -2 175.875 16.0993   2
  -3  -5  -2 166.857 13.2152   3
   3   5   2 170.060 13.8396   3
   3  -5   2 130.952 15.9157   1
  -3   5  -2 198.994 21.4776   2
  -3  -5  -3 57.2958 7.57997   3
   3   5   3 66.2934 10.9331   2
   3  -5   3 39.8048 9.51729   1
  -3  -5  -3 55.8603 8.43906   2
  -3   5  -3 62.0675 11.0862   2
  -3   5  -4 368.034 33.7245   2
  -3  -5  -4 361.293 23.2823   2
   3   5   4 412.988 27.4180   2
  -3  -5  -4 328.501 18.4668   3
   3  -5   4 340.965 27.4812   1
   3  -5   5 372.022 28.7130   1
   3   5   5 370.864 29.0836   2
  -3  -5  -5 351.129 20.3374   3
  -3  -5  -5 347.509 23.7896   2
  -3   5  -5 399.555 36.5251   2
   3   5   6 231.303 24.8577   2
  -3  -5  -6 231.142 16.3414   3
  -3  -5  -6 259.777 20.4587   2
   3  -5   6 251.143 25.0257   1
  -3   5  -6 266.904 29.3604   2
   3   5   7 405.965 36.1733   2
   3  -5   7 404.055 31.8603   1
  -3   5  -7 486.144 42.0930   2
  -3   5  -7 421.418 35.5200   3
  -3  -5  -7 476.756 29.0119   2
   3   5   8 104.380 19.9827   2
  -3   5  -8 112.581 18.7980   3
  -3  -5  -8 114.667 14.2671   2
   3  -5   8 106.641 15.7276   1
   3  -5   9 298.443 28.4215   1
  -3   5  -9 280.375 31.3935   3
   3   5   9 304.312 31.1148   2
  -3  -5  -9 294.601 24.0599   2
  -3   5 -10 22.4221 9.56421   3
  -3  -5 -10 44.8194 8.83608   2
   3  -5  10 30.6019 9.05809   1
   3   5  10 19.2652 6.43435   2
  -3  -5 -11 12.6726 7.91511   2
   3   5  11 25.4633 13.3516   2
   3  -5  11 10.7039 7.12744   1
  -3   5 -11 17.7883 12.1026   3
   3  -5  12 12.8568 6.07627   1
  -3   5 -12 8.56440 6.90562   3
  -3  -5 -12 12.2166 6.76373   3
   3   5  12 18.7979 9.55593   2
  -3  -5 -13 27.4490 9.14642   3
   3   5  13 24.4321 13.8465   2
   3  -5  13 14.6271 6.42632   1
  -3   5 -13 11.7001 5.66016   3
  -3   5 -14 10.8737 7.45519   3
   3  -5  14 4.50885 6.81036   1
  -3  -5 -14 16.5464 4.04646   3
   3   5  14 11.7902 8.71232   2
  -3   5 -15 88.4993 22.4317   3
   3   5  15 136.277 28.2628   2
   3  -5  15 102.496 18.9743   1
  -3  -5 -15 98.0356 14.7918   3
  -3   5 -16 63.2240 25.0174   3
  -3  -5 -16 80.6469 17.8178   3
   3  -5  16 76.8652 17.5677   1
   3   5  16 72.6912 26.8799   2
   3   5  17 135.304 34.2671   2
  -3  -5 -17 186.245 27.4630   3
  -3   5 -17 161.831 31.4111   3
   3  -5  17 188.775 28.0274   1
  -3   5 -18 67.6722 23.7255   3
   3   6 -20 138.095 34.0588   3
   3   6 -19 96.8521 26.3001   3
   3   6 -18 77.8575 23.2343   3
   3   6 -17 37.2023 17.3226   3
   3   6 -16 5.10969 10.2578   3
   3  -6 -16 18.7530 8.14546   3
   3   6 -15 16.0261 12.8851   3
   3  -6 -15 28.7431 5.89658   3
   3   6 -14 25.7635 15.4528   3
   3  -6 -14 19.4270 6.39845   3
   3  -6 -13 247.523 16.1609   3
   3   6 -13 208.516 28.9463   3
   3  -6 -12 0.00458 6.91072   3
   3   6 -12 64.1056 13.4653   3
   3   6 -11 439.142 38.6068   3
   3   6 -11 480.483 33.0650   1
   3   6 -10 66.9366 16.3020   3
   3  -6 -10 0.00324 5.97905   3
   3   6 -10 54.8136 9.62592   1
   3   6  -9 512.666 34.4487   1
   3   6  -9 472.916 37.6159   3
   3   6  -8 127.618 17.4172   1
   3   6  -8 164.211 21.1159   3
  -3  -6   8 154.754 19.9092   3
   3   6  -7 136.233 19.4358   3
   3  -6  -7 148.490 14.0428   1
   3   6  -7 131.368 17.9785   1
  -3  -6   7 144.103 18.9085   3
   3   6  -6 188.767 20.9840   3
  -3  -6   6 193.550 21.1995   3
  -3   6   6 164.172 8.51656   2
   3  -6  -6 189.186 15.5501   1
  -3   6   6 158.275 8.69518   3
  -3   6   5 53.4967 5.03833   3
  -3  -6   5 58.4648 11.9178   3
   3  -6  -5 53.6671 10.0480   1
   3   6  -5 58.5407 9.34849   3
  -3   6   5 54.0149 5.17431   2
   3   6  -4 7.89485 3.06437   3
  -3  -6   4 4.10801 5.86264   3
   3  -6  -4 2.84864 2.32313   1
  -3   6   4-1.53949 1.28439   3
   3   6  -3 81.8502 11.2995   3
  -3  -6   3 61.6108 10.5015   3
   3  -6  -3 66.0506 10.9657   1
  -3  -6   2-0.38090 2.67886   3
   3   6  -2 10.5846 4.94294   3
   3  -6  -2 7.32575 6.53697   1
  -3  -6   1 662.477 32.4872   3
   3   6  -1 648.318 35.3756   2
   3  -6  -1 754.773 38.3675   1
   3   6  -1 745.513 33.8199   3
  -3  -6   0 114.994 12.3437   3
   3   6   0 117.906 19.0289   2
   3  -6   0 128.897 15.6892   1
   3   6   0 121.373 12.8724   3
  -3  -6  -1 1317.78 44.6180   3
   3   6   1 1370.68 51.9514   2
   3  -6   1 1286.00 54.7216   1
   3   6   1 1360.61 44.8713   3
  -3   6  -2 202.599 23.8195   2
   3  -6   2 167.575 18.8048   1
   3   6   2 184.110 14.9337   3
  -3  -6  -2 176.053 13.8774   3
   3   6   2 158.262 16.6389   2
  -3  -6  -3 237.748 15.9941   3
  -3  -6  -3 274.190 21.8403   2
   3  -6   3 283.076 25.1990   1
   3   6   3 264.335 21.7221   2
  -3   6  -3 339.442 31.7399   2
   3   6   4 1.00143 4.07430   2
  -3  -6  -4 1.51622 2.84313   2
  -3  -6  -4 0.02072 1.84554   3
   3  -6   4-1.11953 4.61041   1
  -3   6  -4 4.75676 9.04326   2
  -3  -6  -5 129.525 14.4265   2
   3   6   5 165.937 19.6533   2
   3  -6   5 134.568 18.1519   1
  -3  -6  -5 146.607 12.1633   3
  -3   6  -5 148.814 21.3730   3
  -3   6  -5 202.786 29.0047   2
  -3  -6  -6 64.8230 8.34942   3
   3  -6   6 70.2477 14.0516   1
  -3  -6  -6 65.0371 11.3869   2
  -3   6  -6 87.8418 20.2105   2
   3   6   6 46.1302 12.6623   2
  -3   6  -6 63.1446 14.0260   3
  -3  -6  -7 4.74729 1.53698   3
   3   6   7 9.23175 7.44934   2
  -3  -6  -7 1.92814 2.96668   2
  -3   6  -7 8.30216 9.06832   3
   3  -6   7 2.13772 3.16486   1
  -3  -6  -8 117.557 12.0539   3
   3   6   8 111.711 18.5397   2
   3  -6   8 116.325 17.4833   1
  -3   6  -8 114.060 19.1351   3
  -3  -6  -8 146.415 16.5464   2
  -3  -6  -9 152.499 13.9195   3
  -3   6  -9 151.045 25.0294   3
   3   6   9 152.461 25.3613   2
   3  -6   9 172.872 22.8956   1
  -3  -6  -9 163.572 18.2393   2
  -3   6 -10 117.316 23.3174   3
   3   6  10 115.951 20.1050   2
   3  -6  10 100.360 17.3667   1
  -3  -6 -10 130.691 17.7432   2
   3  -6  11 566.252 42.7877   1
  -3   6 -11 581.690 49.7401   3
  -3  -6 -11 547.475 36.4359   2
   3   6  11 513.754 44.9030   2
   3  -6  12 243.588 28.7935   1
  -3   6 -12 242.464 33.8742   3
  -3  -6 -12 269.647 25.0287   3
   3   6  12 234.813 31.2119   2
   3  -6  13 297.169 32.5219   1
  -3   6 -13 235.807 35.9042   3
  -3  -6 -13 282.878 26.8615   3
   3   6  13 258.016 36.7217   2
   3   6  14 212.596 33.4954   2
   3  -6  14 242.053 29.9397   1
  -3   6 -14 213.763 32.2423   3
  -3  -6 -14 244.356 24.5236   3
  -3  -6 -15 226.123 23.7525   3
   3   6  15 205.980 36.2129   2
  -3   6 -15 180.130 33.0820   3
   3  -6  15 182.446 24.7176   1
  -3   6 -16 89.2851 23.9680   3
   3  -6  16 86.3109 20.7439   1
   3   6  16 54.0199 12.6187   2
  -3   6 -17 21.2760 18.7464   3
   3   6  17 76.4507 22.9754   2
  -3   6 -18-2.45833 12.9666   3
   3   6  18 10.9990 21.6649   2
   3   7 -19 8.21594 4.91164   3
   3   7 -18 43.9720 20.3936   3
   3   7 -17 4.91294 5.21871   3
   3   7 -16 266.166 40.0654   3
   3   7 -15 4.85050 8.15444   3
   3   7 -14 99.4049 22.9487   3
   3  -7 -14 0.00399 9.69601   3
   3   7 -13-0.04397 8.08040   3
   3  -7 -13-0.60085 0.96956   3
   3   7 -12 4.51452 9.36050   3
   3   7 -11 13.7619 8.10988   3
   3   7 -10 49.3801 13.0756   3
   3   7  -9 9.36936 5.81072   3
   3   7  -8 461.293 37.1577   3
   3   7  -7 8.20221 6.63721   3
  -3  -7   7 16.1374 8.59810   3
   3   7  -7 16.1599 5.33351   1
  -3   7   7 14.1267 3.57862   2
  -3   7   6 1055.06 29.1282   2
   3  -7  -6 1057.09 45.9281   1
   3   7  -6 1030.44 52.1913   1
   3   7  -6 1128.71 54.5493   3
  -3  -7   6 1175.51 54.9630   3
   3  -7  -5 61.4442 10.4230   1
   3   7  -5 63.3482 12.9923   3
  -3   7   5 67.3774 6.40092   2
  -3  -7   5 69.7597 12.5467   3
  -3  -7   4 1354.24 56.3899   3
   3  -7  -4 1280.31 50.9735   1
  -3   7   4 1202.11 33.9941   3
   3   7  -4 1431.81 56.8291   3
  -3  -7   3 3.14845 3.69719   3
   3   7  -3 2.49439 3.16787   3
   3  -7  -3 2.89379 5.77566   1
   3   7  -2 1546.74 56.1986   3
   3  -7  -2 1483.25 60.5969   1
  -3  -7   2 1495.80 55.7662   3
   3   7  -1 19.4189 5.30003   3
   3   7  -1 14.1324 8.53625   2
  -3  -7   1 24.3807 7.33685   3
   3  -7  -1 9.65040 6.17935   1
   3   7   0 561.129 29.0859   3
   3   7   0 501.807 31.7788   2
  -3  -7   0 514.113 27.7901   3
   3  -7   0 504.195 33.3816   1
   3   7   1 42.2617 7.70372   3
  -3  -7  -1 23.1271 5.32277   3
   3  -7   1 30.9260 10.1568   1
   3   7   1 30.1861 6.12834   2
   3   7   2 1.87332 3.18692   3
  -3  -7  -2 0.64939 3.21737   3
   3  -7   2 4.81707 3.71865   1
   3   7   2 3.69666 3.95283   2
  -3   7  -2-1.78536 5.64802   3
   3   7   3 11.7735 6.12085   2
  -3  -7  -3 20.5937 4.89456   3
  -3   7  -3 27.0297 7.90991   2
   3  -7   3 14.4296 7.96311   1
  -3   7  -3 11.7839 5.16423   3
   3   7   4 53.6085 10.7215   2
   3  -7   4 50.2463 13.1759   1
  -3   7  -4 61.5153 13.5332   3
  -3   7  -4 84.3212 15.6693   2
  -3  -7  -4 55.7638 7.52264   3
  -3  -7  -5-1.84281 3.33093   3
   3  -7   5 4.60270 3.73410   1
   3   7   5 3.45091 6.39880   2
  -3   7  -5 7.12168 6.18687   3
  -3   7  -5-0.51769 7.71858   2
  -3  -7  -5 1.50293 2.33822   2
  -3  -7  -6 242.715 20.4371   2
   3  -7   6 204.290 24.4713   1
  -3   7  -6 201.825 25.3072   3
  -3  -7  -6 241.964 15.8349   3
   3   7   6 260.887 25.3161   2
  -3   7  -7 22.3119 10.4878   3
   3  -7   7 13.2613 8.68817   1
  -3  -7  -7 25.7793 7.60951   2
  -3  -7  -7 15.5374 4.19559   3
   3   7   7 20.7673 8.83999   2
   3   7   8 187.441 26.0045   2
  -3  -7  -8 230.749 20.7508   2
  -3  -7  -8 247.928 16.8396   3
  -3   7  -8 268.478 31.3171   3
   3  -7   8 197.311 25.4525   1
   3   7   9 10.8674 13.3715   2
   3  -7   9 1.60198 7.16727   1
  -3  -7  -9-0.03066 3.57154   3
  -3   7  -9 2.85238 8.50970   3
  -3  -7  -9-2.01252 5.31606   2
  -3  -7 -10 47.3752 9.03253   3
  -3   7 -10 38.1886 13.2149   3
   3   7  10 42.7185 15.3886   2
  -3  -7 -10 44.5177 10.1006   2
   3  -7  10 55.3751 16.5595   1
  -3  -7 -11 2.57722 2.68632   3
   3   7  11-4.27117 4.26040   2
  -3  -7 -11 1.03030 3.46966   3
   3  -7  11 7.73550 4.30679   1
  -3   7 -11-0.49508 10.3728   3
   3  -7  12 7.33481 4.73715   1
   3   7  12 7.66455 10.8046   2
  -3   7 -12-1.75648 6.58847   3
  -3  -7 -12 11.4227 4.14336   3
  -3   7 -13 21.4793 10.6647   3
   3   7  13-0.72646 8.24518   2
  -3  -7 -13 26.3006 4.90466   3
   3  -7  13 12.2584 9.01661   1
  -3   7 -14 32.7200 15.0439   3
  -3  -7 -14 26.3057 5.86667   3
   3   7  14 24.7642 8.47266   2
   3  -7  14 27.2245 10.2943   1
   3   7  15-10.0001 6.48595   2
  -3   7 -15 2.66735 7.78506   3
   3  -7  15 17.9341 17.2203   1
   3   7  16 81.0530 23.8949   2
  -3   7 -16 109.882 25.8959   3
  -3   7 -17 17.4905 10.5957   3
   3   7  17 27.2271 18.1776   2
   3   8 -18 91.2337 25.1514   3
   3   8 -17 28.4617 10.6899   3
   3   8 -16-4.06822 10.5619   3
   3   8 -15-5.99750 10.4993   3
   3   8 -14 87.7775 18.2535   3
   3   8 -13 24.1639 14.7719   3
   3   8 -12 138.638 23.6231   3
   3   8 -11 93.5852 20.6762   3
   3   8 -10 203.456 28.1278   3
   3   8  -9 166.024 23.1996   3
  -3   8   8 183.256 11.9517   2
   3   8  -8 210.521 26.0171   3
   3   8  -7 58.4694 13.3982   3
  -3   8   7 72.3260 6.60763   2
  -3  -8   6 157.186 20.0563   3
  -3   8   6 135.695 10.4381   2
   3   8  -6 136.095 19.6644   3
  -3   8   5 1.86166 1.50415   3
   3   8  -5 1.91061 5.01579   3
  -3  -8   5 6.88001 5.49104   3
   3  -8  -5 0.20391 2.48852   1
  -3   8   5 4.83497 2.96368   2
  -3  -8   4 2.73252 4.70655   3
   3   8  -4-1.09273 4.89286   3
   3  -8  -4 1.55529 5.63498   1
  -3   8   4 1.61011 2.15402   3
  -3   8   4 0.78333 2.51486   3
   3  -8  -3 20.9352 6.49735   1
  -3  -8   3 13.4715 6.25185   3
   3   8  -3 20.8985 6.80439   3
  -3   8   3 23.2710 4.65449   3
   3   8  -2 88.8720 13.2460   3
   3  -8  -2 84.8536 14.3738   1
  -3   8   2 85.7478 10.4617   3
  -3  -8   2 94.3842 12.1771   3
   3   8  -2 88.7904 15.1354   2
   3   8  -1 18.2205 4.66033   3
   3  -8  -1 20.0200 8.07836   1
  -3  -8   1 18.1475 6.19630   3
  -3   8   1 20.3128 8.23207   3
   3   8  -1 15.7751 5.40879   2
   3   8   0 310.140 26.5933   2
   3   8   0 361.662 23.8571   3
   3  -8   0 333.197 29.0510   1
  -3   8   0 352.197 25.3110   3
  -3  -8   0 338.620 23.5713   3
   3  -8   1 137.826 19.2992   1
   3   8   1 189.693 16.2994   3
  -3   8  -1 147.907 17.6752   3
  -3  -8  -1 156.094 15.2570   3
   3   8   1 138.488 17.9352   2
   3   8   2 160.006 18.8935   2
  -3   8  -2 161.280 20.6401   3
  -3  -8  -2 149.108 13.4724   3
   3   8   2 156.399 14.3767   3
   3  -8   2 111.670 17.8352   1
   3  -8   3 7.68984 4.52967   1
   3   8   3 10.9999 3.20117   2
  -3  -8  -3 12.0914 4.81586   3
  -3   8  -3 31.2458 9.98285   3
  -3  -8  -4 58.4769 8.22030   3
   3   8   4 78.0923 11.7639   2
   3  -8   4 55.2327 13.4180   1
  -3   8  -4 68.5617 13.5212   3
  -3   8  -4 54.4413 14.4114   2
  -3  -8  -5-3.44775 2.38134   3
  -3   8  -5 7.42059 6.61030   3
   3  -8   5 7.11929 7.61499   1
   3   8   5 5.38481 4.31218   2
   3  -8   6 21.8138 10.9028   1
  -3  -8  -6 6.17299 2.59559   3
  -3   8  -6 13.3440 3.86219   3
   3   8   6 9.18142 3.84982   2
   3  -8   7 26.9926 11.1573   1
  -3  -8  -7 18.6956 2.83112   3
  -3   8  -7 26.9358 11.2303   3
   3   8   7 34.7424 14.1913   2
  -3  -8  -7 23.3162 8.53441   2
  -3   8  -8 85.7474 19.2421   3
  -3  -8  -8 130.453 17.9594   2
   3   8   8 115.615 18.7118   2
  -3  -8  -8 92.0636 9.95827   3
   3  -8   8 112.988 19.2881   1
   3  -8   9 133.444 22.8232   1
  -3  -8  -9 145.023 18.8158   2
  -3   8  -9 166.558 26.4021   3
   3   8   9 155.556 23.7292   2
   3  -8  10 444.362 40.2288   1
   3   8  10 492.363 43.8293   2
  -3   8 -10 457.704 44.7470   3
   3  -8  11 290.455 34.2623   1
  -3   8 -11 324.298 37.1210   3
  -3  -8 -11 352.891 22.5741   3
   3   8  11 307.020 35.2185   2
  -3   8 -12 269.172 35.7759   3
  -3  -8 -12 303.470 21.6930   3
   3  -8  12 282.345 34.4302   1
   3   8  12 314.891 35.8904   2
   3  -8  13 191.165 29.1148   1
  -3   8 -13 185.228 28.8837   3
   3   8  13 194.840 32.7088   2
   3   8  14 167.179 32.0484   2
   3  -8  14 222.838 33.5926   1
  -3   8 -14 222.232 38.0528   3
   3   8  15 55.6338 23.5867   2
  -3   8 -15 48.1716 16.4789   3
  -3   8 -16 27.2304 13.8778   3
   3   8  16 35.5024 17.8330   2
   3   9 -17 105.646 27.4337   3
   3   9 -16 17.1937 12.8313   3
   3   9 -15 236.301 38.3483   3
   3   9 -14 7.18936 6.97392   3
   3   9 -13 132.137 24.8687   3
   3   9 -12 17.5628 15.1523   3
   3   9 -11 5.79207 7.80380   3
   3   9 -10 6.43771 7.69103   3
  -3   9   9 243.290 16.9440   2
   3   9  -9 268.263 31.3835   3
   3   9  -8 11.3320 3.68850   3
  -3   9   8 11.7957 1.37873   2
  -3   9   7 526.095 21.9692   2
   3   9  -7 510.045 41.3728   3
   3   9  -6-2.59831 7.09375   3
  -3   9   6 2.18176 4.51195   2
   3   9  -5 928.370 50.9649   3
  -3   9   5 892.493 34.5984   2
  -3  -9   5 956.818 51.0677   3
   3  -9  -4 48.1539 9.78850   1
   3   9  -4 52.3794 12.8573   3
  -3  -9   4 42.1657 9.15617   3
  -3   9   4 33.0278 6.07126   3
  -3   9   3 1056.64 38.0546   3
  -3  -9   3 1098.24 52.0757   3
   3   9  -3 1069.86 52.3289   3
   3  -9  -3 1157.32 56.1905   1
   3   9  -2 6.93536 5.93171   3
   3   9  -2 0.18614 5.68398   2
  -3  -9   2 1.45351 4.45839   3
  -3   9   2 4.89688 4.70676   3
   3  -9  -2 3.25979 6.37363   1
  -3  -9   1 600.726 34.7484   3
   3   9  -1 576.962 39.8764   2
  -3   9   1 605.899 32.6835   3
   3  -9  -1 517.154 38.2866   1
   3   9  -1 649.019 35.8053   3
   3   9   0 6.58309 3.13006   3
  -3  -9   0 3.58832 2.23356   3
  -3   9   0-3.21120 3.04404   3
   3   9   0 6.24785 3.08568   2
   3  -9   0 8.29024 5.38584   1
  -3  -9  -1 9.54006 3.95321   3
   3   9   1 14.7274 6.16090   3
  -3   9  -1 10.6670 5.59736   3
   3  -9   1 10.6024 5.87632   1
   3   9   1 16.3443 8.90490   2
  -3   9  -2 4.35648 3.67833   3
  -3  -9  -2 6.60636 4.31133   3
   3   9   2-1.29588 4.46197   2
   3  -9   2-2.72698 3.37469   1
   3   9   2 2.80220 3.16916   3
   3   9   3 46.5837 9.51540   2
   3  -9   3 39.2956 10.3654   1
  -3   9  -3 34.0056 8.76652   3
  -3  -9  -3 57.5932 9.86767   3
   3  -9   4 34.9538 11.6987   1
   3   9   4 31.7281 9.75269   2
  -3  -9  -4 27.5521 5.32449   3
  -3   9  -4 24.5359 10.7095   3
   3  -9   5 247.275 27.5431   1
  -3  -9  -5 195.132 14.1681   3
  -3   9  -5 193.441 25.5970   3
   3   9   5 249.646 23.8435   2
   3   9   6 6.10586 5.27218   2
   3  -9   6 1.93396 7.10275   1
  -3   9  -6 1.67376 6.06056   3
   3  -9   7 304.863 33.1974   1
   3   9   7 358.502 32.3634   2
  -3   9  -7 345.376 35.4939   3
   3  -9   8 20.7763 10.7257   1
   3   9   8 19.0418 9.42303   2
  -3   9  -8 12.1752 6.81007   3
   3  -9   9 254.938 30.3799   1
  -3   9  -9 206.427 29.1659   3
   3   9   9 214.090 31.3303   2
  -3  -9 -10-0.22774 2.27625   3
   3  -9  10 8.21407 7.36428   1
   3   9  10 10.2028 10.8180   2
  -3   9 -10 7.13882 12.0202   3
  -3   9 -11 33.9138 9.93271   3
   3   9  11 28.1692 11.0940   2
   3  -9  11 45.3881 11.9861   1
  -3   9 -12 14.9245 13.5452   3
   3   9  12-3.06294 13.1827   2
   3  -9  12-1.18608 9.34185   1
   3   9  13 9.91226 4.53114   2
   3  -9  13 2.99294 5.16278   1
  -3   9 -13-10.7401 5.30809   3
  -3   9 -14-4.13117 6.33924   3
   3   9  14-2.31119 11.4262   2
  -3   9 -15 38.1790 22.1669   3
   3  10 -16 9.89056 15.0633   3
   3  10 -15 4.09121 12.5758   3
   3  10 -14 48.9654 16.1942   3
   3  10 -13 39.5255 12.6647   3
   3  10 -12 91.4402 21.7441   3
   3  10 -11 91.5042 20.6916   3
   3  10 -10 180.250 27.3864   3
   3  10  -9 169.686 25.3143   3
  -3  10   9 151.044 12.8222   2
   3  10  -8 126.152 21.7601   3
  -3  10   8 164.994 12.9610   2
  -3  10   7 161.475 12.6197   2
   3  10  -7 160.463 21.6313   3
   3  10  -6 23.2367 3.34096   3
  -3  10   6 26.7932 6.32399   2
   3  10  -5 2.58123 3.11543   3
  -3  10   5 3.16869 4.93781   2
   3  10  -4 43.6914 12.6699   3
  -3  10   4 45.7695 6.57192   3
  -3 -10   4 63.4075 14.0624   3
  -3 -10   3 28.4579 9.67608   3
  -3  10   3 32.0475 6.94399   3
   3  10  -3 28.3034 9.66875   3
   3  10  -2 173.536 20.5323   3
   3 -10  -2 173.695 23.4523   1
  -3  10   2 177.845 16.7101   3
  -3 -10   2 157.991 17.1553   3
   3  10  -2 192.790 23.6840   2
   3  10  -1 68.9364 11.9519   3
  -3  10   1 66.4838 11.8799   3
  -3 -10   1 76.3602 11.5081   3
   3  10  -1 65.9655 14.2442   2
   3 -10  -1 57.8864 14.3686   1
   3  10   0 150.187 21.3773   2
  -3 -10   0 172.215 17.4127   3
  -3  10   0 194.183 20.4629   3
   3  10   0 191.737 18.7412   3
   3 -10   0 218.030 26.5968   1
   3  10   1 67.7968 13.3766   2
   3  10   1 64.5585 10.7373   3
  -3 -10  -1 58.1175 8.94800   3
  -3  10  -1 55.1092 12.8977   3
   3 -10   1 66.5005 16.3598   1
   3  10   2 315.900 29.1105   2
   3 -10   2 328.346 33.7670   1
  -3 -10  -2 360.208 23.3291   3
  -3  10  -2 337.167 29.7841   3
   3  10   2 365.948 23.6829   3
  -3  10  -3 27.7644 9.54142   3
   3 -10   3 23.7720 11.6692   1
   3  10   3 17.1840 5.78412   2
  -3 -10  -3 18.8328 2.41497   3
  -3 -10  -4 164.185 13.9628   3
  -3  10  -4 175.883 22.8057   3
   3 -10   4 142.406 22.9397   1
   3  10   4 157.126 19.6261   2
   3  10   5 11.6086 7.37974   2
  -3  10  -5 11.5103 5.48414   3
   3 -10   5 10.1164 7.61870   1
   3  10   6 4.21659 7.95064   2
   3 -10   6 3.27026 4.06178   1
  -3  10  -6 14.7353 9.61946   3
  -3  10  -7 72.4308 17.6568   3
   3  10   7 51.9847 13.6039   2
   3 -10   7 68.9513 17.6533   1
  -3  10  -8 26.9946 13.4742   3
   3  10   8 19.4761 12.8433   2
   3 -10   8 20.8090 3.83068   1
   3  10   9 137.480 24.9552   2
  -3  10  -9 114.208 21.6684   3
   3 -10   9 143.061 25.2437   1
   3  10  10 126.414 24.6908   2
  -3  10 -10 116.712 23.7306   3
   3 -10  10 113.069 24.1546   1
   3  10  11 175.970 31.9633   2
   3 -10  11 175.104 29.9552   1
  -3  10 -11 142.293 27.7629   3
   3  10  12 165.813 32.6942   2
  -3  10 -12 122.366 27.4808   3
   3  10  13 165.845 28.8327   2
  -3  10 -13 135.495 29.9723   3
  -3  10 -14 63.4194 23.3062   3
   3  11 -15 15.1136 9.86500   3
   3  11 -14 168.313 32.4009   3
   3  11 -13 22.0213 14.6699   3
   3  11 -12 35.1156 14.4971   3
   3  11 -11 1.91999 8.99677   3
   3  11 -10 40.2304 14.8498   3
   3  11  -9 9.49225 7.36949   3
   3  11  -8 343.372 37.2171   3
  -3  11   8 383.125 21.6760   2
  -3  11   7-0.50583 2.07091   2
   3  11  -7 8.28159 4.77461   3
  -3  11   6 455.945 26.3415   2
   3  11  -6 437.403 39.2459   3
   3  11  -5 1.60338 3.11473   3
  -3  11   5 0.70752 5.01608   2
  -3  11   4 561.816 22.2743   3
   3  11  -4 615.976 43.8058   3
   3  11  -3 22.0835 9.45440   3
  -3  11   3 22.3979 5.47892   3
  -3 -11   3 36.7515 10.3887   3
  -3  11   2 694.779 35.3550   3
   3  11  -2 562.861 43.6968   2
  -3 -11   2 632.440 39.8749   3
   3  11  -2 650.380 40.2747   3
   3  11  -1 39.4850 10.8313   3
  -3  11   1 47.9353 11.4200   3
   3  11  -1 47.4046 12.1113   2
   3  11   0 170.994 17.8335   3
   3  11   0 167.429 21.7906   2
  -3  11   0 142.526 17.6942   3
  -3 -11   0 175.640 18.1043   3
   3  11   1 79.5783 11.5749   3
  -3 -11  -1 74.4649 12.2271   3
  -3  11  -1 81.1711 14.4435   3
   3  11   1 63.0094 13.2403   2
   3  11   2 16.4472 6.54971   3
   3 -11   2 25.5117 16.1013   1
   3  11   2 16.8410 9.29863   2
  -3  11  -2 16.7533 6.74262   3
  -3 -11  -2 16.4806 3.60481   3
   3  11   3 56.9991 13.6956   2
  -3 -11  -3 21.4938 4.25012   3
   3 -11   3 30.3513 6.97484   1
  -3  11  -3 46.3085 11.7170   3
  -3  11  -4 201.107 25.4625   3
  -3 -11  -4 142.616 14.4768   3
   3 -11   4 197.668 29.4353   1
   3  11   4 191.738 23.3611   2
   3 -11   5 36.8372 14.2100   1
  -3  11  -5 41.3722 12.3993   3
   3  11   5 51.9844 13.5694   2
  -3  11  -6 404.381 39.3431   3
   3  11   6 422.357 35.1489   2
   3 -11   6 421.747 42.8503   1
  -3  11  -7 30.1043 7.80609   3
   3  11   7 44.6373 11.5145   2
   3 -11   7 44.5844 11.1034   1
   3  11   8 463.478 43.4197   2
  -3  11  -8 365.016 41.1585   3
  -3  11  -9 1.32701 6.80042   3
   3  11   9 2.75772 9.89697   2
   3  11  10 136.559 26.6128   2
  -3  11 -10 133.888 25.3895   3
   3  11  11 3.19015 13.6452   2
  -3  11 -11-2.76872 4.38782   3
  -3  11 -12-1.75506 8.17560   3
   3  11  12-0.60324 10.4451   2
  -3  11 -13 33.0433 23.5521   3
  -3  11 -14-6.01886 21.4994   3
   3  12 -14 6.90975 6.04746   3
   3  12 -13 144.333 30.2238   3
   3  12 -12 34.2409 17.2749   3
   3  12 -11 291.346 37.7470   3
   3  12 -10 55.2470 12.6208   3
   3  12  -9 281.965 35.2140   3
   3  12  -8 53.3259 13.8073   3
   3  12  -7 199.501 28.6935   3
  -3  12   7 248.563 18.8492   2
   3  12  -6 60.5087 17.3191   3
  -3  12   6 74.3184 12.1222   2
   3  12  -5 22.4250 10.3374   3
  -3  12   5 47.2934 8.62690   2
  -3  12   4-0.34179 4.32019   2
   3  12  -4-2.96964 7.87622   3
   3  12  -3 94.4928 17.5098   2
  -3  12   3 101.089 11.9166   3
   3  12  -3 94.9460 16.6182   3
   3  12  -2-0.42271 4.42271   2
  -3  12   2 0.49731 4.77775   3
   3  12  -2 4.98151 7.01910   3
  -3 -12   2 9.37230 7.42053   3
   3  12  -1 305.853 28.0109   3
  -3  12   1 308.195 25.4910   3
  -3 -12   1 284.316 27.3456   3
   3  12  -1 308.426 33.9492   2
   3  12   0 20.0634 7.61316   3
  -3 -12   0 25.1149 8.67498   3
   3  12   0 32.7596 12.1066   2
  -3  12   0 15.7964 2.88305   3
  -3  12  -1 355.250 31.5989   3
  -3 -12  -1 305.108 26.4431   3
   3  12   1 345.535 34.0345   2
   3  12   1 368.398 26.3371   3
   3  12   2 11.8617 3.11182   2
  -3  12  -2 32.1871 11.8312   3
   3  12   2 35.8922 9.85364   3
  -3  12  -3 180.163 25.3390   3
   3  12   3 208.368 26.1871   2
   3  12   4 19.0600 10.4153   2
  -3  12  -4 40.1011 16.0221   3
  -3  12  -5 151.115 25.5357   3
   3  12   5 140.965 20.9556   2
  -3  12  -6 15.7905 5.28861   3
   3  12   6 27.9264 8.38264   2
  -3  12  -7 17.4095 4.73168   3
   3  12   7 11.5783 6.47211   2
  -3  12  -8 71.0824 20.3830   3
   3  12   8 66.2741 16.3993   2
  -3  12  -9 19.9878 15.1200   3
   3  12   9 36.4555 15.5543   2
  -3  12 -10 54.4473 17.8819   3
   3  12  10 68.5470 15.0082   2
   3  12  11 63.1249 24.5087   2
  -3  12 -11 87.0646 29.7755   3
  -3  12 -12 86.2974 24.3887   3
  -3  12 -13 91.9743 29.2754   3
   3  13 -13 91.9230 24.8320   3
   3  13 -12 83.3402 19.0416   3
   3  13 -11 2.22379 11.8466   3
   3  13 -10 36.0106 7.95397   3
   3  13  -9 31.1844 13.5798   3
   3  13  -8 21.4698 8.20765   3
   3  13  -7 103.562 21.0057   3
   3  13  -6 17.1592 8.73029   3
   3  13  -5 229.534 29.3921   3
  -3  13   5 201.964 20.2954   2
   3  13  -4 7.13349 6.78422   3
  -3  13   4 10.0093 8.55003   2
   3  13  -4 15.0033 10.4089   2
   3  13  -3 247.477 27.4246   3
   3  13  -3 242.784 31.3490   2
   3  13  -2 19.5362 8.31672   3
   3  13  -2 17.7284 14.4397   2
   3  13  -1 50.2576 8.71786   3
  -3  13   1 59.0428 12.2918   3
   3  13  -1 47.8536 14.0542   2
   3  13   0 36.8920 7.60344   3
   3  13   0 22.3590 10.9565   2
  -3  13   0 32.6812 9.81328   3
  -3  13  -1 14.5795 5.46854   3
   3  13   1 18.5441 8.71937   2
   3  13   1 15.0177 6.22195   3
  -3  13  -2 25.5480 10.9508   3
   3  13   2 17.3025 4.00022   2
   3  13   3 60.6190 11.9306   2
  -3  13  -3 54.4281 10.9651   3
   3  13   4 54.9423 14.2575   2
  -3  13  -4 37.3324 14.5357   3
   3  13   5 228.618 26.9516   2
  -3  13  -5 211.649 30.5093   3
   3  13   6 63.4858 16.1913   2
  -3  13  -6 34.3993 13.7764   3
  -3  13  -7 247.276 35.3383   3
   3  13   7 328.536 35.4840   2
  -3  13  -8 58.0100 19.7203   3
   3  13   8 49.9181 17.6588   2
  -3  13  -9 148.085 23.8852   3
   3  13   9 127.702 28.1978   2
  -3  13 -10 13.2876 16.5435   3
  -3  13 -11 13.7320 12.6316   3
   3  14 -12 244.277 39.9969   3
   3  14 -11 27.5408 8.36403   3
   3  14 -10 214.490 32.2973   3
   3  14  -9 1.21488 7.29945   3
   3  14  -8 172.602 28.3148   3
   3  14  -7 8.94833 7.83337   3
   3  14  -6 97.9455 20.7684   3
   3  14  -5-2.97431 4.94759   3
   3  14  -5 14.8125 12.4145   2
   3  14  -4 15.1097 14.7448   2
   3  14  -4 12.3095 9.23283   3
  -3  14   4 10.7415 8.04674   2
   3  14  -3 46.0155 14.3051   3
   3  14  -3 40.5642 13.0411   2
  -3  14   3 39.6345 11.6952   2
   3  14  -2 209.870 29.9013   2
   3  14  -2 218.491 24.8652   3
   3  14  -1 46.2689 12.6673   2
   3  14   0 261.205 34.2141   2
   3  14   1 107.987 21.1775   2
  -3  14  -2 297.141 33.0726   3
   3  14   2 207.846 28.6691   2
  -3  14  -3 60.0591 14.0637   3
   3  14   3 86.8615 20.4097   2
   3  14   4 242.683 28.4555   2
  -3  14  -4 205.022 28.2399   3
   3  14   5 11.8395 9.06872   2
  -3  14  -5 8.00272 4.33463   3
  -3  14  -6 103.044 26.8359   3
   3  14   6 93.1023 18.0292   2
  -3  14  -7-1.99588 12.5309   3
   3  14   7-0.69795 9.45202   2
  -3  14  -8-0.82823 10.2473   3
  -3  14  -9 10.4910 20.5584   3
  -3  14 -10 5.91059 8.31952   3
   3  15 -11 7.06898 12.9676   3
   3  15 -10 3.44489 17.2139   3
   3  15  -9 2.12101 9.90924   3
   3  15  -8 19.1334 12.0290   3
   3  15  -7 5.89746 9.70204   3
   3  15  -6 110.057 22.3407   3
   3  15  -6 115.746 25.6836   2
   3  15  -5 16.1569 10.2756   3
   3  15  -5 8.28060 9.22429   2
   3  15  -4 165.903 29.4416   2
   3  15  -3 7.29291 13.2289   2
  -3  15   2 64.3414 14.0457   2
   3  15  -2 84.3971 22.2712   2
   3  15  -1 9.80619 8.54969   2
   3  15   0 14.1961 8.02475   2
   3  15   1-0.11222 9.20374   2
   3  15   2 16.9721 6.94767   2
   3  15   3 41.9939 13.8460   2
   3  15   4 78.7108 20.6379   2
  -3  15  -5 78.8690 16.7121   3
   3  15   5 60.5394 18.6546   2
  -3  15  -6 157.399 33.0824   3
   3  15   6 175.040 27.0654   2
  -3  15  -7 76.6094 25.5226   3
  -3  15  -8 37.2604 8.66257   3
  -3  15  -9-1.73865 5.63457   3
   3  16  -9 25.7636 11.7774   3
   3  16  -4-3.06693 5.24533   2
   3  16  -3 45.9251 14.0944   2
   3  16  -2 5.67756 11.6265   2
   3  16  -1 201.170 36.8763   2
   3  16   0 23.9427 6.07145   2
   3  16   1 267.968 34.9267   2
   3  16   2 19.6290 5.85371   2
   3  16   3 162.058 27.9072   2
   3  16   4 10.7874 12.9327   2
   4   0 -23-37.9551 14.5789   3
   4   0 -22 21.6343 11.5728   3
   4   0 -21 2.21400 6.78444   3
   4   0 -20 56.1003 21.7839   3
   4   0 -19-6.74475 6.32076   3
   4   0 -18 193.648 28.2327   3
   4   0 -17-2.69266 7.20711   2
   4   0 -17 4.02614 8.65011   3
   4   0 -16 194.163 27.5177   3
   4   0 -16 117.725 20.9185   2
   4   0 -15 5.84157 6.93566   3
   4   0 -15 2.32720 11.1835   2
   4   0 -14 16.6133 17.9964   2
   4   0 -14 7.85908 6.79554   3
  -4   0  13-8.33884 6.46585   3
   4   0 -13-3.96432 7.22656   3
   4   0 -13 4.23684 2.07522   1
   4   0 -13-5.93993 7.02092   2
  -4   0  12 82.0482 14.8845   3
   4   0 -12 82.0368 9.47988   1
   4   0 -12 60.4479 14.3925   3
   4   0 -11 0.74217 3.87982   3
  -4   0  11 8.72921 5.46982   3
  -4   0  10 665.114 36.6520   3
   4   0 -10 622.668 37.5939   3
   4   0  -9-0.41439 4.45112   3
  -4   0   9-1.04361 4.74275   3
  -4   0   8 2183.79 68.6390   3
   4   0  -8 2123.72 69.3327   3
   4   0  -7 1.26861 4.75576   3
  -4   0   7 1.73403 2.71789   3
  -4   0   6 2702.77 74.5117   3
   4   0  -6 2706.25 62.3197   2
   4   0  -6 2653.00 74.1397   3
   4   0  -5 0.38425 2.20920   2
   4   0  -5 4.42818 3.69988   3
  -4   0   5-2.14582 2.84378   3
  -4   0   4 1234.20 42.3063   3
   4   0  -4 1282.02 36.2732   2
   4   0  -4 1196.80 42.5443   3
   4   0  -3 0.62683 2.09122   2
  -4   0   3-1.42003 3.61602   3
  -4   0   3 1.47122 1.98636   2
   4   0  -3 0.32699 3.61067   3
   4   0  -2 560.823 27.6087   3
   4   0  -2 654.140 27.2983   2
  -4   0   2 570.167 26.5412   3
  -4   0   2 659.420 24.5637   2
  -4   0   1-1.78435 3.62484   3
  -4   0   1-0.29187 2.70425   2
   4   0  -1-1.83727 4.09556   2
  -4   0   0 111.025 11.1448   2
   4   0   0 94.1301 12.6679   2
  -4   0   0 102.985 11.1423   3
   4   0   1 1.92604 4.43337   2
  -4   0  -1-1.79533 4.51809   2
   4   0   2 400.605 29.7216   2
  -4   0  -2 409.260 25.9166   2
   4   0   3 2.68068 6.28958   2
  -4   0  -3 4.71910 5.33514   2
  -4   0  -4 1051.08 50.3689   2
   4   0   4 1017.05 52.7034   2
   4   0   5-6.14531 4.51311   2
  -4   0  -5 3.11841 5.27313   2
  -4   0  -6 1261.00 67.3238   2
   4   0   6 1526.97 72.4684   2
   4   0   7-1.80804 4.44198   2
  -4   0  -7-5.85411 6.78382   2
  -4   0  -8 545.396 44.4552   2
   4   0   8 499.152 44.3439   2
   4   0   9-3.03397 10.5868   2
  -4   0  -9-9.98888 6.39342   2
   4   0  10 31.2366 7.63766   2
   4   0  11 12.2588 12.9499   2
   4   0  12-1.46622 12.0324   2
  -4   0 -13-3.12480 4.98800   3
   4   0  13-6.94876 14.5677   2
  -4   0 -14 249.388 32.9378   3
  -4   0 -15 2.85254 10.9193   3
   4   0  15 4.70825 5.79082   1
   4   0  16 232.189 23.0107   1
  -4   0 -16 170.455 28.9665   3
  -4   0 -17 13.3402 6.18932   3
  -4   0 -18 104.255 21.8734   3
  -4   0 -19 4.48894 10.0002   3
  -4   0 -20 27.5512 12.7548   3
  -4   0 -21 1.01781 6.25232   3
   4   1 -23 36.8193 11.7719   3
   4  -1 -23 78.6951 25.4056   3
   4   1 -22 145.821 29.8844   3
   4  -1 -22 107.777 18.4004   3
   4  -1 -21 158.667 26.7502   3
   4   1 -21 124.485 25.1225   3
   4   1 -20 137.033 28.1760   3
   4  -1 -20 123.330 24.5462   3
   4  -1 -19 36.8681 7.16459   3
   4   1 -19 57.0863 15.7750   3
   4   1 -18 34.5603 11.2086   3
   4  -1 -18 34.2318 12.6211   3
   4  -1 -17-3.06289 7.33994   3
   4   1 -17 5.79343 4.07581   3
   4   1 -16 6.81195 4.17480   3
   4  -1 -16 8.25976 5.56719   3
   4   1 -16-12.0206 14.3898   2
   4  -1 -16 16.7803 8.02613   2
   4   1 -15 264.261 30.6454   3
   4  -1 -15 261.593 27.5668   3
   4  -1 -15 253.132 29.7454   2
   4  -1 -14 39.4363 11.2587   2
   4   1 -14 100.230 18.6580   3
   4   1 -14 116.331 12.2916   1
  -4   1  14 112.775 16.8317   3
   4  -1 -14 92.2140 15.9517   3
   4  -1 -13 198.304 21.9542   3
   4   1 -13 223.836 16.1491   1
  -4   1  13 178.973 19.9945   3
   4   1 -13 154.393 21.3153   3
   4  -1 -13 162.905 22.4606   2
   4  -1 -12 209.110 12.0004   1
   4   1 -12 255.042 18.3610   1
  -4  -1  12 227.770 24.7771   3
   4   1 -12 213.947 24.6880   3
   4  -1 -12 225.678 23.3272   3
  -4   1  12 230.927 22.9662   3
   4   1 -11 238.344 24.6871   3
  -4  -1  11 248.660 24.5156   3
   4  -1 -11 237.157 22.5916   3
  -4   1  11 230.832 22.0457   3
   4   1 -10 340.586 28.1123   3
  -4   1  10 329.959 25.6246   3
  -4  -1  10 367.373 28.3221   3
   4  -1 -10 344.801 25.9507   3
   4  -1  -9 131.440 14.9786   3
  -4   1   9 143.666 15.3745   3
  -4  -1   9 124.468 16.0292   3
   4   1  -9 126.293 16.3782   3
  -4   1   8 561.457 30.1822   3
  -4  -1   8 584.598 33.8402   3
   4  -1  -8 551.414 30.4538   3
   4   1  -8 579.892 33.8669   3
  -4   1   7 83.7423 11.2026   3
  -4  -1   7 90.1525 11.7786   3
   4  -1  -7 78.1390 7.28869   2
   4   1  -7 80.3875 11.3167   3
   4  -1  -7 87.8794 11.0639   3
   4  -1  -6 32.1872 5.14961   3
  -4  -1   6 39.7488 7.23569   3
  -4   1   6 33.4930 7.10075   3
   4  -1  -6 35.5317 4.80646   2
   4   1  -6 38.1944 7.11546   3
  -4  -1   5 244.299 18.4436   3
  -4   1   5 245.251 17.0463   3
   4   1  -5 296.824 17.0415   2
   4  -1  -5 251.103 12.3794   2
   4   1  -5 239.932 18.6197   3
   4  -1  -5 234.229 16.9566   3
   4  -1  -4 7.44039 2.57394   2
  -4   1   4 2.01507 3.26420   3
   4   1  -4 7.77020 2.69710   2
   4  -1  -4 10.8907 6.21873   3
  -4  -1   4 7.33916 5.18697   3
  -4   1   4 6.41033 2.03921   2
   4   1  -4 0.97837 2.20411   3
   4   1  -3 1076.59 35.0177   2
  -4   1   3 935.309 34.2982   3
   4  -1  -3 1020.99 37.2217   3
   4  -1  -3 1049.70 33.3985   2
  -4  -1   3 959.458 32.7479   2
  -4  -1   3 971.669 37.0865   3
  -4   1   3 956.887 28.7584   2
   4   1  -3 977.638 37.6340   3
   4  -1  -2 109.017 12.2637   2
  -4  -1   2 71.5096 8.24581   2
   4   1  -2 91.8884 10.7419   3
  -4   1   2 79.5669 8.08409   2
   4   1  -2 82.9676 9.20197   2
  -4   1   2 92.5636 10.5713   3
  -4  -1   2 67.8236 9.43204   3
  -4   1   1 2756.70 71.4759   3
  -4   1   1 3088.33 71.2435   2
  -4  -1   1 2867.75 68.8385   2
  -4  -1   1 2620.79 70.7771   3
   4   1  -1 2991.46 71.2965   2
   4   1  -1 2922.59 74.1469   3
   4  -1  -1 2684.88 77.9198   2
  -4  -1   0 3.68569 2.96296   2
  -4  -1   0 1.70707 3.50296   3
  -4   1   0 7.10267 5.05257   2
   4   1   0 3.61892 2.44430   2
   4  -1   0 23.2668 9.76079   2
   4   1   1 530.620 29.7308   2
  -4   1  -1 547.197 31.3356   2
  -4  -1  -1 546.873 26.5000   2
   4  -1   1 514.736 32.0815   2
  -4  -1  -1 548.424 27.7055   3
  -4   1  -2 35.3822 9.93970   2
   4   1   2 62.0998 14.5836   2
   4  -1   2 53.0794 13.0263   2
  -4  -1  -2 43.0397 9.26974   2
   4   1   3 661.786 42.2117   2
  -4  -1  -3 714.389 35.1033   2
   4  -1   3 656.087 40.3918   2
  -4   1  -3 656.583 39.1533   2
   4  -1   4 25.9097 10.9384   2
   4   1   4 36.3988 11.3401   2
  -4   1  -4 32.8753 8.16800   2
  -4  -1  -4 11.6795 8.50010   2
  -4   1  -5 18.7633 3.81802   2
   4   1   5 27.9159 7.84656   2
  -4  -1  -5 32.6657 8.81949   2
   4  -1   5 29.1363 11.3586   2
  -4  -1  -6 298.305 26.5014   2
   4   1   6 262.276 28.8580   2
  -4   1  -6 227.490 26.7259   2
   4  -1   6 234.876 28.2118   2
   4   1   7 123.096 19.8004   2
   4  -1   7 105.295 18.2096   2
  -4   1  -7 103.412 17.3549   2
  -4  -1  -7 95.7191 15.5968   2
  -4  -1  -8 280.629 28.8317   2
   4  -1   8 333.085 36.8734   2
  -4   1  -8 324.137 32.2347   2
   4   1   8 343.717 34.7608   2
  -4   1  -9 611.087 48.2989   2
  -4  -1  -9 729.724 49.9339   2
   4  -1   9 549.411 48.9359   2
   4   1   9 519.466 45.1883   2
  -4  -1 -10 647.984 48.4130   2
   4  -1  10 504.335 50.6671   2
   4   1  10 494.252 46.0708   2
   4  -1  11 244.672 36.1114   2
   4   1  11 262.045 32.6373   2
   4   1  12 248.081 34.0367   2
   4   1  13 301.178 42.5460   2
  -4   1 -13 290.543 34.7354   3
  -4   1 -14 177.378 30.5945   3
   4  -1  14 118.258 22.3303   1
  -4  -1 -14 149.098 23.9105   3
   4   1  14 174.365 35.6125   2
   4  -1  15 58.3496 13.6278   1
  -4   1 -15 80.8177 21.4902   3
  -4  -1 -15 67.8850 19.3237   3
   4  -1  16 42.7005 11.5934   1
  -4   1 -16 39.2652 15.3323   3
  -4  -1 -16 36.4909 11.7999   3
  -4   1 -17-5.47698 14.5163   3
  -4  -1 -17-7.61216 6.67398   3
  -4   1 -18-6.62104 14.8963   3
  -4  -1 -18 3.65824 7.76343   3
  -4  -1 -19 19.0221 14.6940   3
  -4   1 -19 14.8442 17.1785   3
  -4  -1 -20 43.5530 22.5129   3
  -4   1 -20 18.7923 14.7188   3
  -4  -1 -21 34.1326 17.4320   3
   4   2 -22-71.7498 20.4525   3
   4  -2 -22 2.64589 8.19813   3
   4  -2 -21 32.6451 12.6140   3
   4   2 -21 87.0618 24.8949   3
   4   2 -20 33.3680 10.2493   3
   4  -2 -20 9.41142 8.59542   3
   4  -2 -19 91.9247 18.8955   3
   4   2 -19 137.394 26.9186   3
   4  -2 -18 21.2436 6.89889   3
   4   2 -18 17.2674 8.01849   3
   4  -2 -17 269.911 29.6422   3
   4   2 -17 240.471 32.8456   3
   4  -2 -16 25.6313 10.1448   3
   4   2 -16 15.0704 7.28179   3
   4  -2 -16 18.2360 11.0313   2
   4  -2 -15 274.174 27.9281   3
  -4   2  15 255.274 26.4068   3
   4   2 -15 247.641 30.3590   3
   4   2 -15 320.192 22.6636   1
   4  -2 -15 334.431 29.1321   2
   4  -2 -14 118.589 17.5023   2
   4  -2 -14 85.7669 15.0911   3
   4   2 -14 97.6815 12.0036   1
   4   2 -14 96.3716 18.3090   3
  -4   2  14 95.8383 16.8254   3
   4  -2 -13 7.72043 7.25950   3
   4   2 -13-0.78986 3.50095   1
   4  -2 -13 7.10817 8.34747   2
  -4   2  13 2.84686 6.97727   3
   4   2 -13-0.08008 6.78607   3
   4  -2 -12 54.0326 9.70183   2
   4  -2 -12 51.0063 9.43703   3
   4   2 -12 47.7629 12.9541   3
   4   2 -12 50.2821 9.29628   1
  -4  -2  12 42.5843 10.8764   3
  -4   2  12 19.4338 4.52869   3
   4   2 -11 358.124 31.7015   3
  -4  -2  11 370.421 31.1292   3
  -4   2  11 335.638 26.1215   3
   4  -2 -11 346.184 26.2861   3
   4  -2 -11 424.849 26.6723   2
   4   2 -10 5.67855 7.19682   3
  -4   2  10-2.07815 4.88474   3
  -4  -2  10 5.79734 3.71387   3
   4  -2 -10 4.49879 3.65688   2
   4  -2 -10 0.23865 5.19849   3
   4   2  -9 582.352 36.6455   3
  -4   2   9 572.694 30.0263   3
  -4  -2   9 607.003 36.1724   3
   4  -2  -9 574.310 30.0762   3
  -4   2   8 37.6839 7.03200   3
   4  -2  -8 47.1175 9.42140   3
   4   2  -8 32.9160 8.89252   3
   4  -2  -8 26.4469 4.44743   2
  -4  -2   8 38.5479 9.46428   3
  -4   2   7 1482.11 48.5376   3
  -4  -2   7 1529.53 56.9806   3
   4   2  -7 1527.81 57.5568   3
   4  -2  -7 1418.00 32.5760   2
   4  -2  -7 1533.02 49.1418   3
   4   2  -6 16.7657 2.72434   3
  -4   2   6 14.3076 2.42195   3
   4  -2  -6 17.9025 2.67892   2
   4  -2  -6 16.6931 4.64603   3
  -4  -2   6 19.1197 3.28035   3
   4  -2  -5 2558.52 65.3601   3
  -4  -2   5 2316.72 70.2462   3
   4   2  -5 2321.46 70.9986   3
   4  -2  -5 2430.77 51.6586   2
  -4   2   5 2357.68 62.1737   3
  -4  -2   4 1.92571 4.96345   3
   4   2  -4-0.16565 2.06102   2
   4  -2  -4 2.06094 3.73499   2
  -4   2   4-1.03966 2.17834   2
   4   2  -4 1.36980 2.31212   3
  -4   2   4 4.07598 3.56453   3
   4  -2  -4-0.64627 2.54236   3
   4   2  -3 1406.43 47.1235   2
   4  -2  -3 1657.47 47.3962   2
  -4   2   3 1715.43 40.9943   2
   4   2  -3 1759.17 54.2171   3
  -4  -2   3 1722.46 53.5081   3
  -4   2   3 1690.30 48.1605   3
  -4  -2   2 12.3338 5.11000   3
  -4  -2   2 8.10104 2.74379   2
   4   2  -2 6.57176 2.59732   3
   4   2  -2 14.9353 4.28827   2
  -4   2   2 16.8202 4.59278   2
   4  -2  -2 17.3028 8.60376   2
  -4   2   2 4.77728 2.10081   3
   4   2  -1 280.681 19.2218   3
  -4  -2   1 228.376 16.3528   2
  -4   2   1 290.124 20.4830   2
   4   2  -1 295.159 19.2112   2
  -4  -2   1 262.438 17.5075   3
   4  -2  -1 293.405 21.1860   2
  -4  -2   0 1.64202 2.27784   3
   4  -2   0 3.12741 3.98810   2
   4   2   0 10.3844 4.62258   2
  -4   2   0 5.83481 6.19094   2
  -4  -2   0 9.69876 4.78122   2
   4   2   0 8.19129 4.70810   3
  -4   2  -1 22.2677 5.86948   2
  -4  -2  -1 22.0374 6.23177   2
  -4  -2  -1 16.8932 5.63586   3
   4   2   1 22.7500 6.39532   2
   4  -2   1 32.7660 7.32310   2
   4  -2   2 38.8658 11.9494   2
  -4  -2  -2 42.6248 8.50123   2
   4   2   2 40.9402 7.89466   2
  -4   2  -2 53.6044 12.2205   2
  -4  -2  -2 47.0928 7.68140   3
  -4  -2  -3 632.097 31.2231   2
   4  -2   3 625.061 40.6024   2
  -4   2  -3 690.621 39.8929   2
   4   2   3 675.124 39.7817   2
   4   2   4 96.9772 19.7784   2
  -4  -2  -4 177.024 17.5271   2
   4  -2   4 192.901 23.0703   2
  -4   2  -4 201.175 21.6056   2
  -4  -2  -5 642.392 36.6569   2
   4  -2   5 787.863 50.4812   2
  -4   2  -5 804.478 47.1885   2
   4   2   5 870.400 54.8704   2
  -4  -2  -6 58.2355 11.8344   2
   4   2   6 76.3032 18.3649   2
   4  -2   6 65.2369 16.3656   2
  -4   2  -6 89.6183 15.6912   2
  -4  -2  -7 659.552 42.7235   2
   4  -2   7 409.992 40.5345   2
   4   2   7 387.390 36.2747   2
  -4   2  -7 416.536 38.4340   2
   4   2   8-5.49180 7.35816   2
  -4  -2  -8 4.02885 6.24333   2
   4  -2   8-0.39819 7.61928   2
  -4   2  -8-0.76539 4.19214   2
   4   2   9 107.785 20.3320   2
  -4  -2  -9 149.180 19.5692   2
   4  -2   9 127.069 25.9683   2
   4   2  10 58.5709 17.6217   2
  -4  -2 -10 35.6245 11.6645   2
   4   2  11-6.02519 5.02305   2
  -4   2 -12 8.23975 8.76283   3
   4   2  12 8.10511 7.66894   2
  -4   2 -13 81.6154 19.2257   3
   4   2  13 71.5573 24.6626   2
   4  -2  13 79.8400 16.8364   1
   4  -2  14-1.41579 2.88999   1
  -4   2 -14-8.55153 12.8910   3
  -4  -2 -14 11.4242 5.02709   3
   4   2  14-5.11174 5.06314   2
   4  -2  15 197.030 24.0636   1
  -4   2 -15 130.114 27.8280   3
  -4  -2 -15 145.641 25.6480   3
   4   2  15 157.991 36.2847   2
  -4   2 -16 16.7910 8.68177   3
  -4  -2 -16 2.45585 8.41597   3
   4   2  16 9.14034 11.8486   2
   4  -2  16 35.7659 10.4768   1
   4  -2  17 152.268 21.9636   1
  -4   2 -17 119.733 24.8922   3
  -4  -2 -17 147.705 26.9037   3
  -4   2 -18 22.4566 18.9040   3
  -4  -2 -18 2.50806 4.11410   3
  -4  -2 -19 80.5197 19.2622   3
  -4   2 -19 111.829 26.9727   3
  -4  -2 -20 9.38788 7.33410   3
  -4   2 -20 3.74262 7.95248   3
   4   3 -22 94.0045 26.1029   3
   4  -3 -21 69.5570 18.7602   3
   4   3 -21 60.7097 19.5350   3
   4  -3 -20 26.5025 7.80154   3
   4   3 -20 69.3284 19.2138   3
   4  -3 -19 45.6742 7.89490   3
   4   3 -19 55.6432 20.3928   3
   4  -3 -18 5.92317 7.72200   3
   4   3 -18 0.17615 15.6407   3
   4  -3 -17 1.75816 6.44773   3
   4   3 -17-0.77012 4.22831   3
   4   3 -16 110.842 22.9683   3
   4  -3 -16 134.419 20.4872   2
   4  -3 -16 107.368 16.2755   3
   4  -3 -15-2.12907 4.91941   3
   4   3 -15-0.77930 6.07373   3
   4  -3 -15 14.3354 6.96052   2
  -4   3  15 18.4980 8.11896   3
   4   3 -14 240.723 29.6977   3
   4  -3 -14 236.570 21.9031   2
   4  -3 -14 255.929 24.0696   3
   4   3 -14 261.565 21.5722   1
  -4   3  14 207.054 21.8543   3
   4   3 -13 1.26671 4.55402   1
   4   3 -13 5.34612 3.80102   3
   4  -3 -13-0.27057 6.47476   3
   4  -3 -13 10.7929 6.32467   2
  -4   3  13-1.45256 4.51971   3
   4  -3 -12 555.799 27.2879   2
   4   3 -12 595.530 34.6981   1
   4   3 -12 577.800 44.0520   3
   4  -3 -12 557.441 32.7983   3
  -4   3  12 530.247 32.1053   3
   4   3 -11 179.756 23.5437   3
  -4   3  11 155.336 15.8269   3
  -4  -3  11 158.686 20.3451   3
   4  -3 -11 146.719 12.0593   2
   4  -3 -11 168.846 16.6591   3
   4  -3 -10 472.664 27.2236   3
   4   3 -10 451.357 35.2966   3
  -4   3  10 451.321 27.1935   3
  -4  -3  10 502.194 36.2232   3
   4  -3  -9 55.0464 9.31444   3
   4   3  -9 49.4327 10.8865   3
  -4   3   9 44.5443 8.32052   3
  -4  -3   9 39.7171 9.24388   3
   4   3  -8 416.413 30.9023   3
  -4  -3   8 453.982 31.5180   3
   4  -3  -8 431.639 23.5384   3
  -4   3   8 409.426 23.4126   3
   4   3  -7-1.01494 3.03905   3
  -4   3   7 2.27173 3.39666   3
  -4  -3   7 1.26993 4.23461   3
   4  -3  -7-0.74076 2.70141   3
   4   3  -6 3.85590 3.04029   3
  -4   3   6 0.13802 2.22857   3
  -4  -3   6 4.58590 3.13523   3
   4  -3  -6 5.70403 2.76040   3
   4  -3  -5 30.9096 5.82365   3
   4   3  -5 29.8932 7.84704   3
  -4  -3   5 33.0922 6.40478   3
  -4   3   5 30.8824 5.42106   3
   4   3  -4 1032.97 42.5659   3
   4   3  -4 1032.21 40.3520   2
  -4   3   4 1017.82 25.9327   2
   4  -3  -4 948.614 32.6416   2
  -4  -3   4 1060.56 43.0632   3
  -4   3   4 1012.61 34.1767   3
   4   3  -3 4.58269 4.39774   3
  -4   3   3 8.12724 3.58969   2
   4  -3  -3 3.67168 4.74242   2
  -4  -3   3 0.80744 4.54930   3
   4   3  -3 6.29444 3.47287   2
  -4   3   3 4.68609 3.39669   3
   4  -3  -2 687.652 31.8167   2
   4   3  -2 538.427 27.8130   2
  -4   3   2 605.589 28.0490   2
  -4  -3   2 561.097 28.5238   3
   4   3  -2 597.885 29.7308   3
   4   3  -1 610.034 29.2129   3
  -4  -3   1 545.664 27.4399   2
  -4  -3   1 558.143 27.3235   3
  -4   3   1 560.832 28.6563   2
   4  -3  -1 595.491 31.8927   2
   4   3  -1 562.217 28.3725   2
  -4  -3   0 877.717 35.2545   2
   4   3   0 899.248 36.1564   3
   4  -3   0 1006.42 44.6897   2
   4   3   0 767.180 35.0866   2
  -4   3   0 853.334 39.4020   2
  -4  -3   0 838.463 33.8352   3
  -4  -3  -1 155.245 14.8168   2
  -4  -3  -1 160.711 14.0869   3
   4   3   1 161.543 15.7066   2
   4  -3   1 174.294 19.1830   2
  -4   3  -1 167.388 17.7465   2
   4   3   2 1279.96 50.2540   2
  -4   3  -2 1167.37 52.7944   2
   4  -3   2 1328.38 59.8790   2
  -4  -3  -2 1190.77 44.0727   3
  -4  -3  -2 1440.29 48.5502   2
  -4   3  -3 36.7044 11.4681   2
  -4  -3  -3 35.0693 7.45761   3
   4   3   3 35.7232 9.31787   2
   4  -3   3 50.5783 14.0581   2
  -4  -3  -3 31.9991 7.52915   2
  -4  -3  -4 90.3284 11.9083   2
   4   3   4 130.287 30.4419   2
  -4   3  -4 117.444 19.0908   2
   4  -3   4 110.006 20.4730   2
  -4  -3  -5 35.8207 6.74141   2
   4   3   5 56.7585 16.7496   2
  -4   3  -5 56.6639 16.7522   2
   4  -3   5 48.3218 13.1758   2
  -4  -3  -6 71.3116 11.5609   2
   4   3   6 87.5178 16.1324   2
  -4   3  -6 71.9269 15.7781   2
   4  -3   6 96.0053 20.5125   2
  -4  -3  -7 184.581 20.5620   2
   4   3   7 119.223 18.6946   2
  -4   3  -7 130.186 20.9900   2
  -4  -3  -8 176.938 19.1293   2
   4   3   8 183.734 24.9923   2
  -4   3  -8 205.774 27.0204   2
  -4  -3  -9 289.091 26.4046   2
   4   3   9 243.662 29.8803   2
  -4  -3 -10 318.068 31.4427   2
   4   3  10 232.828 31.9840   2
   4   3  11 204.739 31.0695   2
  -4   3 -12 359.425 40.7810   3
   4  -3  12 314.909 33.3875   1
   4   3  12 380.327 42.7552   2
   4  -3  13 142.893 19.8806   1
  -4   3 -13 111.436 24.1324   3
   4   3  13 128.914 27.1296   2
   4   3  14 123.933 21.9684   2
   4  -3  14 157.774 21.2421   1
  -4   3 -14 125.658 24.3997   3
  -4  -3 -14 135.345 20.4892   3
  -4  -3 -15 121.172 23.0884   3
  -4   3 -15 99.3065 22.9900   3
   4   3  15 140.091 27.9900   2
   4  -3  15 129.387 20.0934   1
  -4   3 -16-5.63421 10.3994   3
   4  -3  16-9.60919 8.31045   1
  -4  -3 -16-10.1697 12.5220   3
   4   3  16-7.12011 16.0460   2
   4  -3  17 18.6459 8.76641   1
  -4   3 -17 46.4329 18.6577   3
  -4  -3 -17 28.2976 10.3723   3
   4   3  17 2.29344 13.5310   2
  -4   3 -18 63.0165 21.6820   3
  -4  -3 -18 33.9255 11.0848   3
  -4  -3 -19-12.5967 17.1787   3
  -4   3 -19-13.0412 13.5754   3
   4   4 -21 14.1001 18.2816   3
   4   4 -20 92.7099 25.1412   3
   4  -4 -19 76.0327 16.1416   3
   4   4 -19 78.1764 19.8116   3
   4   4 -18 158.097 28.8410   3
   4  -4 -18 175.165 22.2919   3
   4  -4 -17 104.733 16.2738   3
   4   4 -17 108.211 23.7589   3
   4   4 -16 233.717 32.0205   3
   4  -4 -16 276.061 24.5918   3
   4   4 -16 203.060 20.7594   1
   4  -4 -15 77.7197 14.4478   3
   4   4 -15 87.8447 21.5708   3
   4   4 -15 59.9914 11.3127   1
   4  -4 -14 172.745 18.5287   3
   4   4 -14 144.328 17.8384   1
   4   4 -14 149.326 24.1101   3
  -4   4  14 158.075 17.8850   3
   4  -4 -13 120.105 15.4774   3
   4   4 -13 88.0999 17.1072   3
   4   4 -13 123.565 15.0692   1
  -4   4  13 107.864 14.9927   3
   4  -4 -12-0.35431 2.70870   3
   4   4 -12-3.07540 6.63779   3
  -4   4  12-3.62710 6.32675   3
   4   4 -12-3.44815 6.78373   1
   4   4 -11 17.0989 7.45285   3
  -4   4  11 27.0143 8.18162   3
   4   4 -11 22.1625 7.51310   1
   4  -4 -11 11.4238 5.31418   3
   4   4 -10 360.011 33.1144   3
  -4   4  10 346.902 22.4139   3
  -4  -4  10 371.054 32.1718   3
   4  -4 -10 263.645 13.5998   1
   4  -4 -10 371.842 21.9317   3
   4  -4  -9 4.40369 3.67228   3
  -4  -4   9 24.4617 8.55823   3
   4   4  -9 11.5891 5.70854   3
  -4   4   9 14.6783 5.71301   3
   4  -4  -9 12.4232 3.52049   1
   4  -4  -8 1419.15 44.1806   3
  -4   4   8 1206.42 41.7373   3
   4   4  -8 1240.58 57.8254   3
  -4  -4   8 1344.27 58.8567   3
   4   4  -7 0.74972 5.29670   3
  -4  -4   7 6.98742 6.45617   3
   4  -4  -7 5.29355 1.96634   3
  -4   4   7 4.98950 2.53629   3
  -4  -4   6 606.660 36.1714   3
  -4   4   6 599.932 25.3569   3
   4   4  -6 621.592 36.1439   3
  -4   4   5 39.7627 6.07330   3
   4   4  -5 39.4603 9.02758   3
  -4  -4   5 42.4609 8.36217   3
   4   4  -4 641.366 34.5375   3
  -4  -4   4 671.365 34.5128   3
   4   4  -4 567.513 31.6603   2
  -4   4   4 642.159 26.2450   2
  -4   4   4 671.074 26.5439   3
  -4   4   3 9.08399 3.96506   2
  -4  -4   3 5.09783 2.50735   3
   4   4  -3 1.43787 4.94784   2
  -4   4   3 5.19280 2.78473   3
   4   4  -3 2.75986 5.64851   3
   4   4  -2 868.009 38.2457   2
  -4   4   2 968.390 37.1492   2
  -4  -4   2 878.480 37.9702   3
   4   4  -2 968.106 39.8178   3
  -4  -4   1 130.992 13.1985   3
   4   4  -1 98.9017 11.7574   2
   4   4  -1 130.721 13.9000   3
  -4   4   1 166.270 17.1820   2
   4   4   0 80.6966 11.3426   2
  -4  -4   0 71.7842 9.64993   3
  -4   4   0 84.1147 11.9286   2
   4   4   0 79.7374 10.6922   3
  -4  -4   0 67.2878 10.5608   2
   4   4   1 28.4798 7.25115   3
  -4   4  -1 25.4386 8.65370   2
   4   4   1 24.7479 6.74855   2
  -4  -4  -1 23.3140 5.73234   2
  -4  -4  -1 22.9923 5.78065   3
  -4   4  -2 8.24338 7.58904   2
  -4  -4  -2 5.41128 3.28822   3
   4   4   2 12.3484 5.22202   2
  -4  -4  -2 5.59174 3.30081   2
  -4  -4  -3 24.8901 6.85167   3
  -4   4  -3 28.0867 7.13570   2
   4   4   3 29.2867 17.8818   2
  -4  -4  -3 27.7507 5.77511   2
  -4  -4  -4 1468.43 48.5522   3
   4   4   4 1130.47 56.2876   2
  -4   4  -4 1387.99 64.4697   2
  -4  -4  -4 1246.11 49.4550   2
  -4  -4  -5 203.843 16.9480   3
   4   4   5 249.534 26.8453   2
  -4  -4  -5 199.061 18.3571   2
  -4   4  -5 196.102 23.7645   2
   4   4   6 724.564 49.9488   2
  -4   4  -6 716.507 48.4519   2
  -4  -4  -6 750.941 38.4826   2
   4   4   7 118.352 21.5690   2
  -4   4  -7 95.9936 20.0615   2
  -4  -4  -7 103.411 13.1994   2
   4   4   8 288.260 32.6478   2
  -4  -4  -8 327.058 25.2951   2
   4   4   9 54.8428 14.6404   2
  -4  -4  -9 61.0506 9.76419   2
   4   4  10 20.5560 12.5169   2
  -4  -4 -10 24.5840 10.4148   2
   4  -4  10 14.6741 10.0703   1
   4   4  11 4.92121 8.20001   2
   4  -4  11 6.25299 8.92693   1
  -4   4 -11 18.6335 14.3134   3
   4  -4  12 2.86892 6.26676   1
  -4   4 -12 5.26824 12.6917   3
   4   4  12 28.2696 13.9086   2
   4  -4  13 28.4969 9.68314   1
   4   4  13 10.6232 5.75795   2
  -4   4 -13 30.4747 14.6827   3
  -4   4 -14 79.8361 20.9526   3
  -4  -4 -14 108.984 22.8824   3
   4   4  14 75.7315 20.0057   2
   4  -4  14 97.3001 16.3378   1
   4   4  15 48.9857 17.2809   2
   4  -4  15 86.7720 17.0802   1
  -4   4 -15 40.5206 16.9413   3
  -4  -4 -15 59.8759 16.0923   3
   4  -4  16 180.275 23.9557   1
  -4   4 -16 136.964 32.1154   3
  -4  -4 -16 136.383 23.5044   3
   4   4  16 92.7644 26.4534   2
  -4   4 -17 19.7737 16.1198   3
   4  -4  17 56.6666 17.0829   1
  -4  -4 -17 18.2213 9.60049   3
   4   4  17 26.2052 11.2482   2
  -4   4 -18 92.8621 25.7521   3
  -4  -4 -18 106.346 23.6541   3
   4   5 -20 12.6396 16.1294   3
   4   5 -19 14.1350 6.91676   3
   4   5 -18 6.54196 9.82387   3
   4  -5 -18 19.6941 9.36302   3
   4  -5 -17 29.3506 6.63431   3
   4   5 -17 15.2006 6.74062   3
   4  -5 -16-3.82969 3.08273   3
   4   5 -16 3.38710 10.5968   3
   4   5 -15 143.663 26.5400   3
   4   5 -15 140.420 19.6391   1
   4  -5 -15 127.754 15.3849   3
   4   5 -14-0.16546 8.07226   3
   4   5 -14 3.49565 4.33292   1
   4  -5 -14 9.75536 5.78048   3
   4   5 -13 325.253 35.5460   3
   4   5 -13 349.126 28.4837   1
   4  -5 -13 412.712 24.9884   3
   4  -5 -12 96.0526 11.4744   3
   4   5 -12 114.305 18.8688   3
  -4   5  12 114.368 13.0868   3
   4   5 -12 94.8600 15.0112   1
   4   5 -11 733.214 42.1782   1
   4   5 -11 701.111 48.8880   3
  -4   5  11 688.459 31.9689   3
   4  -5 -11 718.824 31.3363   3
   4  -5 -10 55.1834 7.27121   1
   4   5 -10 67.4982 15.7827   3
  -4   5  10 56.0284 8.80285   3
   4   5 -10 60.7162 13.5029   1
   4  -5 -10 62.5630 8.61993   3
   4   5  -9 167.718 21.8119   3
  -4   5   9 165.160 13.4000   3
  -4  -5   9 179.478 22.5752   3
   4  -5  -9 166.308 12.3183   1
   4  -5  -9 177.602 14.2958   3
   4  -5  -8 7.78554 3.71770   3
  -4   5   8 2.22355 2.23352   3
  -4  -5   8 3.25799 4.18930   3
   4  -5  -8-2.94328 3.05933   1
   4   5  -8-2.35628 5.30525   3
   4   5  -7 125.629 16.9221   3
   4  -5  -7 114.679 12.2748   1
  -4   5   7 131.021 10.8117   3
  -4  -5   7 146.047 18.6983   3
  -4   5   6 15.4404 3.83952   3
  -4  -5   6 11.5845 4.73272   3
   4   5  -6 23.9286 6.51441   3
  -4   5   5 154.673 9.82959   2
  -4  -5   5 177.270 19.1535   3
   4   5  -5 170.956 18.5560   3
  -4   5   5 159.610 11.0182   3
  -4   5   4 39.0042 6.15457   3
  -4   5   4 44.9037 5.39952   2
   4   5  -4 43.2764 8.40161   3
  -4  -5   4 45.9825 9.95742   3
   4   5  -3 1222.35 48.9530   3
  -4  -5   3 1209.28 48.2582   3
   4   5  -3 1129.11 48.3844   2
  -4   5   3 1247.85 42.2895   2
  -4   5   2 13.2227 2.85269   2
  -4  -5   2 6.42809 5.47005   3
   4   5  -2 11.4276 7.14151   3
   4   5  -2 9.79266 6.90968   2
   4   5  -1 1885.01 58.9262   3
  -4  -5   1 1767.00 57.3627   3
  -4   5   1 1833.47 62.9462   2
   4   5  -1 1741.17 60.8433   2
   4   5   0 409.558 25.0758   3
  -4  -5   0 372.168 23.9283   3
  -4   5   0 382.435 27.4908   2
   4   5   0 418.805 27.4420   2
  -4  -5  -1 749.492 36.1503   2
  -4  -5  -1 741.358 32.8611   3
   4   5   1 769.438 34.5339   3
  -4   5  -1 752.794 41.2469   2
   4   5   1 743.814 37.9309   2
  -4  -5  -2 17.6438 3.97187   3
   4   5   2 20.1193 8.79461   2
  -4   5  -2 20.8416 7.76716   2
  -4  -5  -2 17.5918 5.07278   2
  -4  -5  -3 528.175 26.8085   3
   4   5   3 537.201 33.0601   2
  -4   5  -3 554.801 39.4326   2
  -4  -5  -3 517.372 30.4122   2
  -4  -5  -4 57.7354 8.88495   3
  -4  -5  -4 69.5690 12.2592   2
   4   5   4 54.1169 11.3919   2
  -4   5  -4 53.4851 13.2118   2
  -4  -5  -5 161.260 15.1169   3
   4   5   5 147.938 19.9482   2
  -4   5  -5 160.293 23.4540   2
  -4  -5  -5 119.965 15.1289   2
   4   5   6 30.0806 10.9937   2
  -4  -5  -6 20.4219 6.63177   2
  -4   5  -6 32.1383 6.87229   2
  -4  -5  -6 19.7600 3.89112   3
  -4  -5  -7 3.93893 6.42044   2
  -4  -5  -7-0.60437 5.18063   3
   4   5   7 0.07135 9.64699   2
   4   5   8 160.696 26.0954   2
   4  -5   8 126.056 19.6354   1
  -4  -5  -8 147.126 17.6705   2
   4   5   9 104.618 20.3770   2
  -4  -5  -9 132.952 17.3097   2
   4  -5   9 99.9148 17.9043   1
  -4   5 -10 367.701 38.9974   3
   4  -5  10 423.686 36.2839   1
   4   5  10 364.217 39.0312   2
  -4   5 -11 304.175 36.1202   3
   4  -5  11 318.789 31.4831   1
   4   5  11 292.883 35.5349   2
   4  -5  12 129.707 20.8477   1
  -4   5 -12 125.176 24.7616   3
   4   5  12 111.114 26.3376   2
   4  -5  13 197.324 25.8782   1
  -4   5 -13 132.157 26.4913   3
   4   5  13 203.308 30.8378   2
   4   5  14 32.4960 12.5875   2
   4  -5  14 66.0346 13.8833   1
  -4   5 -14 61.6098 15.0748   3
  -4  -5 -14 75.1822 17.9946   3
   4   5  15-0.65766 11.2967   2
   4  -5  15 2.32949 13.6786   1
  -4   5 -15 3.73742 8.24757   3
  -4  -5 -15 2.68458 5.45699   3
   4   5  16 9.92547 12.2104   2
   4  -5  16 6.59655 12.4825   1
  -4   5 -16 11.7711 12.1434   3
  -4  -5 -16 42.2973 18.2719   3
   4  -5  17 31.3808 11.6851   1
  -4   5 -17 21.2289 13.7404   3
  -4  -5 -17 17.3357 10.6555   3
   4   5  17-3.66814 8.35309   2
  -4   5 -18 1.16842 7.84338   3
   4  -5  18 0.32257 10.3326   1
   4   5  18 4.57645 8.32269   2
   4   6 -20 74.4151 26.0751   3
   4   6 -19 127.757 26.9959   3
   4   6 -18 167.024 32.0818   3
   4   6 -17 235.311 34.8318   3
   4  -6 -16 53.9617 8.47202   3
   4   6 -16 84.9420 21.2653   3
   4   6 -15 221.507 31.3881   3
   4  -6 -15 248.916 19.5051   3
   4   6 -14 38.8025 14.3921   3
   4  -6 -14 43.6388 6.75285   3
   4   6 -13 36.9300 13.2800   3
   4  -6 -13 73.7589 10.1669   3
   4   6 -12 68.5893 13.9987   3
   4  -6 -12 68.9967 9.39413   3
   4  -6 -11 0.00509 4.26667   3
   4   6 -11 7.50996 6.16710   3
   4   6 -10 10.0654 9.13337   3
  -4   6  10 13.6187 3.75172   3
   4   6 -10 12.0080 6.70383   1
   4  -6  -9 187.410 15.0263   1
   4   6  -9 198.136 24.9588   3
  -4   6   9 177.154 12.2566   3
   4   6  -9 151.679 19.7846   1
  -4   6   8 5.11751 3.35546   3
   4  -6  -8 11.2913 5.92974   1
  -4  -6   8 5.29508 5.94253   3
   4   6  -8 6.43471 8.12303   3
  -4   6   7 585.700 23.0192   3
  -4  -6   7 682.004 41.6119   3
   4  -6  -7 663.104 31.7797   1
   4   6  -7 628.150 40.5547   3
   4   6  -6 93.5220 14.7964   3
  -4  -6   6 112.072 15.9094   3
   4  -6  -6 105.158 12.8730   1
  -4   6   6 99.7263 8.37403   3
   4   6  -5 527.541 34.0637   3
  -4  -6   5 544.101 34.8144   3
   4  -6  -5 289.657 22.9959   1
  -4   6   5 276.771 16.8158   2
  -4   6   5 489.920 20.1774   3
   4  -6  -4 11.6248 3.58108   1
   4   6  -4 17.0052 7.26934   3
  -4   6   4 6.11706 3.27193   3
  -4  -6   4 7.80990 7.10257   3
  -4   6   4 6.17762 3.10122   2
  -4  -6   3 296.870 23.5563   3
   4   6  -3 303.994 24.8886   2
   4   6  -3 298.114 23.7376   3
   4  -6  -3 321.583 23.8587   1
  -4   6   3 295.481 20.7808   2
  -4   6   2 85.2205 12.1141   2
   4   6  -2 108.625 14.4856   3
  -4  -6   2 95.0671 12.5806   3
   4  -6  -2 86.0732 13.3847   1
   4   6  -2 124.844 16.1404   2
  -4   6   1-4.21178 3.94251   2
  -4  -6   1-0.81411 3.24250   3
   4   6  -1-0.86595 2.64035   3
   4   6  -1 2.64560 3.97012   2
  -4   6   0 7.12261 7.54776   2
  -4  -6   0 4.59203 2.23068   3
   4   6   0-0.04856 3.21394   2
   4   6   0 0.63615 5.62325   3
   4   6   1 95.2031 12.4842   3
  -4  -6  -1 96.7824 11.2613   3
  -4   6  -1 93.7992 14.1637   2
   4   6   1 101.394 14.5389   2
  -4  -6  -2 93.2013 10.8780   3
  -4  -6  -2 120.820 15.2485   2
   4   6   2 104.150 14.6188   2
  -4   6  -2 112.841 17.7778   2
   4  -6   3 367.622 31.2749   1
   4   6   3 495.411 31.4306   2
  -4  -6  -3 462.303 30.4625   2
  -4  -6  -3 529.354 27.1637   3
  -4   6  -3 528.176 39.4551   2
  -4  -6  -4 443.576 29.2732   2
   4   6   4 359.551 31.1145   2
   4  -6   4 377.317 31.4470   1
  -4   6  -4 438.298 37.2541   2
  -4  -6  -4 389.456 23.2027   3
  -4  -6  -5 632.740 35.4927   2
   4  -6   5 581.567 38.9435   1
   4   6   5 557.065 39.2785   2
  -4  -6  -5 568.379 28.3558   3
  -4   6  -5 657.978 48.1753   2
  -4  -6  -6 238.437 19.0287   3
   4   6   6 200.548 25.7564   2
  -4  -6  -6 235.337 21.7356   2
   4  -6   6 200.658 24.0209   1
  -4  -6  -7 510.215 28.1902   3
   4  -6   7 536.618 39.8875   1
  -4  -6  -7 409.376 30.9855   2
   4   6   7 427.628 39.1659   2
  -4  -6  -8 40.7065 7.78020   3
   4   6   8 10.3380 7.56926   2
  -4  -6  -8 36.0702 8.02970   2
   4  -6   8 41.4751 11.5063   1
  -4   6  -8 32.5691 10.7067   3
  -4  -6  -9 168.505 21.2609   2
  -4  -6  -9 183.757 17.3906   3
   4   6   9 132.513 24.1313   2
   4  -6   9 156.778 23.0291   1
  -4   6  -9 169.261 25.7763   3
   4  -6  10 4.59513 6.48243   1
   4   6  10 16.0269 10.8742   2
  -4   6 -10 6.44203 10.0392   3
  -4  -6 -10 10.4903 5.46755   3
   4   6  11-5.00287 8.84319   2
   4  -6  11 0.64303 6.94329   1
  -4   6 -11 7.11706 10.6778   3
   4   6  12 16.8047 7.67655   2
  -4   6 -12 26.5271 10.2638   3
   4  -6  12 23.7284 8.93253   1
   4  -6  13 54.6737 12.0080   1
  -4   6 -13 75.4489 21.0293   3
  -4  -6 -13 72.7250 14.1475   3
   4   6  13 86.5666 22.2473   2
   4   6  14 59.7121 20.6500   2
   4  -6  14 84.7732 18.0512   1
  -4   6 -14 64.4192 17.4944   3
  -4  -6 -14 76.3313 15.4404   3
   4   6  15 58.8441 22.0508   2
   4  -6  15 116.155 20.3683   1
  -4   6 -15 91.3268 25.1920   3
  -4  -6 -15 98.3371 17.2557   3
  -4   6 -16 67.6457 19.9021   3
   4   6  16 64.4355 21.9295   2
   4  -6  16 72.2958 18.9710   1
   4  -6  17 208.571 33.0854   1
  -4   6 -17 165.771 35.1068   3
   4   6  17 123.879 35.1963   2
   4   6  18 57.4317 30.0731   2
   4   7 -19 0.95337 7.78043   3
   4   7 -18-7.55043 10.8160   3
   4   7 -17 12.6032 4.61656   3
   4   7 -16 89.8344 24.2802   3
   4   7 -15 7.81858 6.64438   3
   4   7 -14 229.701 32.0524   3
   4  -7 -14 234.876 15.2424   3
   4   7 -13-0.21603 6.44775   3
   4   7 -12 408.526 40.3624   3
   4   7 -11 31.9948 11.3837   3
   4   7 -10 373.108 37.1263   3
   4  -7  -9 8.04352 4.69199   1
   4   7  -9 20.0766 10.4934   3
   4  -7  -8 172.250 16.7159   1
   4   7  -8 142.481 20.7547   3
   4   7  -7 2.28680 3.89108   3
   4  -7  -7 8.20319 2.20111   1
  -4   7   7-0.52356 1.05689   3
  -4  -7   7-4.92171 5.61943   3
  -4   7   6 26.3749 4.35008   3
  -4  -7   6 38.5932 11.4242   3
   4  -7  -6 19.4310 7.84279   1
   4   7  -6 25.6912 8.59967   3
  -4   7   6 20.6230 3.36578   2
   4  -7  -5 11.5830 3.13543   1
  -4   7   5 1.30718 3.64449   2
  -4  -7   5-0.13489 5.82850   3
  -4   7   5 5.48881 1.85597   3
   4   7  -5 6.10758 3.94385   3
   4   7  -4 362.067 28.2963   3
  -4  -7   4 404.021 29.9663   3
   4  -7  -4 370.279 27.8933   1
  -4   7   4 280.329 21.2729   2
  -4   7   4 360.837 18.8784   3
   4   7  -3 6.27372 6.61019   2
  -4  -7   3 10.1689 3.05443   3
   4   7  -3 5.88526 5.18722   3
   4  -7  -3 2.32726 7.23017   1
  -4   7   3-5.28760 6.01781   2
  -4  -7   2 1246.54 51.5394   3
   4   7  -2 1252.79 51.2420   3
   4   7  -2 1407.69 58.4079   2
   4  -7  -2 1098.27 53.5143   1
  -4   7   2 1055.08 50.8391   2
   4  -7  -1 94.2659 14.3820   1
  -4  -7   1 89.8414 13.1733   3
   4   7  -1 93.9838 14.6000   2
  -4   7   1 145.532 19.3081   2
   4   7  -1 84.0684 12.7693   3
   4   7   0 1527.14 62.5470   2
   4  -7   0 1538.20 65.0954   1
  -4  -7   0 1441.68 53.8690   3
  -4   7   0 1578.09 68.3469   2
   4   7   0 1533.58 55.6077   3
   4   7   1 80.3112 11.0425   3
   4  -7   1 87.3397 15.3647   1
  -4   7  -1 93.8333 17.8143   2
  -4  -7  -1 75.5375 10.6987   3
   4   7   1 81.2157 14.2365   2
   4   7   2 1015.92 41.9930   3
   4  -7   2 1080.87 54.7200   1
  -4   7  -2 1101.14 59.8768   2
   4   7   2 885.545 46.3259   2
  -4  -7  -2 956.701 39.7668   3
   4  -7   3 10.0974 5.50729   1
   4   7   3 4.97679 4.46765   2
  -4   7  -3-6.72275 7.83214   2
  -4  -7  -3 7.76893 4.30245   3
  -4  -7  -4 339.612 21.7521   3
  -4  -7  -4 439.662 30.5315   2
   4  -7   4 330.845 30.6278   1
  -4   7  -4 450.853 40.2299   2
   4   7   4 385.643 30.4257   2
  -4  -7  -5 0.80585 2.49752   3
  -4  -7  -5 13.4749 8.25155   2
   4  -7   5 5.74032 5.76279   1
   4   7   5 1.28098 5.76579   2
  -4  -7  -6 32.7715 5.81583   3
   4  -7   6 31.7787 10.3833   1
   4   7   6 26.1371 7.69934   2
  -4   7  -6 31.9293 13.1231   3
  -4  -7  -6 41.7617 7.73192   2
  -4  -7  -7 5.58644 7.92374   2
  -4  -7  -7 16.4403 3.55986   3
   4  -7   7 3.00843 4.24151   1
   4   7   7-3.19992 9.68223   2
  -4   7  -7 9.07168 8.29032   3
   4   7   8 2.63923 6.37849   2
  -4  -7  -8 4.25943 2.73791   3
  -4   7  -8 5.80029 3.86685   3
   4  -7   8 7.44306 6.15287   1
   4  -7   9 67.7271 16.7654   1
   4   7   9 59.9399 21.4987   2
  -4  -7  -9 73.6985 10.9573   3
  -4   7  -9 70.6444 18.0164   3
  -4  -7 -10 172.922 16.8995   3
   4  -7  10 187.445 24.9767   1
  -4   7 -10 160.593 27.5222   3
   4   7  10 208.526 32.6523   2
   4   7  11 21.2705 10.6131   2
   4  -7  11 5.08575 4.57115   1
  -4   7 -11 0.24425 8.59296   3
  -4  -7 -11 0.66771 3.10365   3
   4   7  12 124.993 26.6556   2
   4  -7  12 111.878 19.6329   1
  -4   7 -12 83.7297 20.4690   3
   4   7  13-0.37928 8.21985   2
   4  -7  13 6.53737 10.4379   1
  -4   7 -13-2.82220 10.1272   3
  -4  -7 -13-6.45462 3.52665   3
   4   7  14 3.24198 9.93245   2
   4  -7  14 23.2676 8.29280   1
  -4   7 -14 38.3042 20.2605   3
  -4  -7 -14 26.6226 8.05786   3
   4  -7  15-6.90658 9.69659   1
   4   7  15 20.4816 11.9014   2
  -4   7 -15 4.52123 5.74202   3
  -4   7 -16-2.01247 9.89524   3
   4   7  16 18.8904 19.3063   2
   4  -7  16 14.8123 9.90295   1
   4   7  17 22.7914 17.4599   2
   4  -7  17 2.13681 11.6947   1
   4   8 -18 165.808 33.8992   3
   4   8 -17 192.459 38.2547   3
   4   8 -16 208.955 35.8647   3
   4   8 -15 136.092 25.6302   3
   4   8 -14 119.707 22.4493   3
   4   8 -13 105.632 24.3314   3
   4   8 -12 61.2155 16.4114   3
   4   8 -11 4.27817 8.36623   3
   4   8 -10 0.70464 7.36476   3
   4   8  -9 75.8446 18.2277   3
   4  -8  -8 62.5871 10.9298   1
   4   8  -8 58.5576 13.6134   3
   4   8  -7 150.061 20.8189   3
   4  -8  -7 154.170 18.4110   1
  -4   8   7 135.932 7.82994   2
  -4   8   6 208.093 12.3462   2
   4   8  -6 226.741 25.0640   3
   4  -8  -6 250.869 22.8252   1
  -4  -8   6 228.181 23.6773   3
  -4   8   5 86.6348 8.32828   3
   4  -8  -5 89.7635 13.3087   1
   4   8  -5 93.9506 16.3049   3
  -4  -8   5 113.462 18.1460   3
  -4   8   5 50.1540 8.81636   2
  -4  -8   4 104.556 15.8152   3
  -4   8   4 82.6047 9.32986   3
   4  -8  -4 85.8860 13.0191   1
   4   8  -4 96.9293 15.7439   3
  -4   8   4 31.2619 10.1759   2
   4   8  -3 6.81142 5.40797   2
  -4  -8   3-2.60787 6.83914   3
   4  -8  -3 13.5944 7.14316   1
  -4   8   3 2.10458 3.80281   2
   4   8  -3 9.26415 4.60887   3
   4   8  -2 8.15028 6.75033   3
  -4  -8   2 7.48960 3.70639   3
  -4   8   2 8.28509 5.62826   2
   4   8  -2 8.98134 8.00480   2
   4  -8  -2 5.75793 2.57438   1
   4  -8  -1 21.5723 7.50728   1
  -4  -8   1 6.83804 3.91591   3
   4   8  -1 14.3604 7.17832   3
   4   8  -1 8.91805 5.03245   2
  -4   8   1 9.88984 4.00692   2
   4   8   0 342.979 28.8006   2
  -4  -8   0 327.336 24.1191   3
   4  -8   0 307.130 28.3463   1
  -4   8   0 336.504 32.6739   2
   4   8   0 330.273 24.3618   3
   4   8   1 76.8237 12.2992   3
   4  -8   1 59.1949 10.6666   1
  -4  -8  -1 78.4098 11.8173   3
   4   8   1 84.9720 14.0370   2
  -4   8  -1 65.1163 18.2003   2
  -4  -8  -2 393.571 25.0492   3
   4  -8   2 350.387 32.5078   1
  -4   8  -2 476.012 40.9024   2
   4   8   2 315.034 27.9686   2
   4   8   2 416.558 27.1008   3
  -4  -8  -3 201.332 16.6873   3
   4  -8   3 243.364 27.2168   1
  -4   8  -3 202.381 24.1587   3
   4   8   3 179.058 21.8257   2
  -4   8  -3 234.485 29.0718   2
   4  -8   4 322.336 31.4842   1
  -4   8  -4 372.616 34.6903   3
   4   8   4 361.855 29.7467   2
  -4  -8  -4 364.706 22.8767   3
  -4  -8  -5 198.870 16.4459   3
   4  -8   5 188.261 23.7386   1
   4   8   5 237.956 25.7239   2
  -4   8  -5 177.247 24.5015   3
  -4  -8  -6 388.252 22.9505   3
   4   8   6 408.308 36.2542   2
   4  -8   6 401.750 35.8081   1
  -4   8  -6 360.243 36.2890   3
   4   8   7 200.202 26.1529   2
   4  -8   7 223.630 28.6338   1
  -4   8  -7 222.720 29.3679   3
  -4  -8  -7 249.203 18.1997   3
   4   8   8 287.056 33.1240   2
   4  -8   8 297.403 32.6960   1
  -4   8  -8 320.847 37.7354   3
  -4  -8  -8 324.148 21.5762   3
  -4  -8  -9 13.9714 2.34243   3
   4   8   9 22.0766 12.0433   2
   4  -8   9 28.5035 14.5857   1
  -4   8  -9 13.6158 12.4841   3
   4   8  10 30.9357 12.7676   2
   4  -8  10 8.57994 6.88571   1
  -4   8 -10 6.22468 4.53635   3
   4   8  11 2.62214 8.73265   2
   4  -8  11 14.5581 11.2266   1
  -4   8 -11 17.5411 12.0529   3
   4   8  12 45.2792 17.3409   2
   4  -8  12 40.8459 10.1914   1
  -4   8 -12 46.2767 16.4695   3
  -4  -8 -12 37.9748 7.71728   3
   4  -8  13 9.97803 10.1676   1
  -4   8 -13 17.3814 6.20858   3
   4   8  13 13.5806 6.49684   2
   4  -8  14 109.609 25.6160   1
   4   8  14 124.584 32.5622   2
  -4   8 -14 112.423 26.2949   3
   4   8  15 36.9596 17.6503   2
  -4   8 -15 107.143 29.8635   3
   4  -8  15 77.9717 16.5311   1
   4   8  16 69.0957 29.7642   2
  -4   8 -16 87.7467 34.8070   3
   4  -8  16 109.399 26.0662   1
   4   9 -17 19.2041 16.2166   3
   4   9 -16 2.38113 9.79005   3
   4   9 -15 275.182 37.6739   3
   4   9 -14-5.06291 9.57830   3
   4   9 -13 435.623 47.4184   3
   4   9 -12-1.81709 10.1069   3
   4   9 -11 377.451 39.4190   3
   4   9 -10 13.8880 11.6171   3
   4   9  -9 301.893 33.5949   3
   4   9  -8-0.51091 5.52280   3
  -4   9   8 2.19181 1.36382   2
   4   9  -7 33.8458 12.5497   3
  -4   9   7 23.5032 3.35897   2
  -4   9   7-3.94082 5.22265   2
   4  -9  -6 0.55195 4.25696   1
  -4   9   6 5.24837 1.93094   3
  -4   9   6 1.73662 2.39218   2
  -4   9   6 0.35345 3.91172   2
   4   9  -6 4.68896 5.00760   3
   4   9  -5 20.9684 9.71299   3
  -4   9   5 15.8924 3.75036   3
  -4  -9   5 15.1262 2.84732   3
  -4   9   5 20.6788 3.36740   3
   4  -9  -5 18.6526 4.45100   1
  -4   9   5 8.74853 7.16535   2
   4   9  -4 37.5193 10.4514   3
  -4  -9   4 29.7313 9.50916   3
   4  -9  -4 33.1938 8.52298   1
  -4   9   4 33.7320 8.05599   3
  -4   9   4 16.6985 5.23319   2
  -4   9   4 30.8479 6.18610   3
  -4  -9   3 422.338 31.2476   3
   4   9  -3 414.884 31.3798   3
   4   9  -3 374.333 32.5874   2
   4  -9  -3 401.859 33.5447   1
  -4   9   3 401.832 24.9182   3
  -4   9   3 250.478 25.0360   2
   4  -9  -2 17.0397 8.52400   1
   4   9  -2 30.8620 9.40601   3
  -4  -9   2 17.5007 6.76256   3
  -4   9   2 22.2090 7.13378   3
  -4   9   2 11.4338 6.19094   2
   4   9  -2 22.3288 8.27120   2
   4   9  -1 935.905 51.5210   2
  -4  -9   1 962.196 46.9701   3
   4  -9  -1 956.710 54.4123   1
   4   9  -1 924.650 45.1461   3
  -4   9   1 935.696 45.1938   3
  -4   9   1 1009.82 57.8263   2
  -4  -9   0-7.79090 4.64406   3
   4  -9   0-4.33286 3.50081   1
   4   9   0 0.30519 5.66190   3
   4   9   0-1.64455 6.26054   2
  -4   9   0-4.20724 6.95830   3
  -4   9   0-3.66235 8.57230   2
   4  -9   1 363.166 33.3247   1
  -4  -9  -1 451.644 28.5339   3
  -4   9  -1 453.335 33.4959   3
  -4   9  -1 514.462 41.7906   2
   4   9   1 447.110 34.5045   2
   4   9   1 480.185 30.5738   3
   4   9   2 3.24568 4.48441   2
  -4  -9  -2 0.23127 2.18144   3
   4  -9   2 5.73944 3.69703   1
  -4   9  -2 6.50425 6.94937   3
  -4   9  -2 32.2699 17.8474   2
   4   9   2-0.63088 4.19454   3
  -4  -9  -3 253.942 20.1334   3
   4  -9   3 201.518 26.9017   1
  -4   9  -3 261.496 27.6879   3
   4   9   3 253.696 26.0093   2
  -4  -9  -4 23.8679 6.15408   3
   4  -9   4 14.5514 6.73246   1
   4   9   4 24.6382 8.45756   2
  -4   9  -4 23.4874 13.2813   3
  -4  -9  -5 36.7558 7.58284   3
   4   9   5 45.0022 11.3692   2
   4  -9   5 37.8028 13.7158   1
  -4   9  -5 47.0246 13.3521   3
  -4  -9  -6 15.2661 5.08319   3
   4  -9   6 14.0449 3.81586   1
  -4   9  -6 2.58480 10.1407   3
   4   9   6 16.6406 6.43157   2
  -4  -9  -7 9.04996 4.55053   3
   4  -9   7 0.21494 3.36620   1
  -4   9  -7-2.47318 4.49525   3
   4   9   7 11.4414 11.0254   2
  -4  -9  -8 2.61313 3.77955   3
   4  -9   8 13.2755 8.23284   1
   4   9   8 16.2973 12.2986   2
  -4   9  -8-4.27850 6.37564   3
   4  -9   9 168.712 28.4341   1
   4   9   9 177.142 30.3286   2
  -4   9  -9 193.150 30.1493   3
   4  -9  10-1.88890 8.01234   1
   4   9  10 19.5430 19.5188   2
  -4   9 -10 6.81475 9.60592   3
   4  -9  11 283.723 37.8721   1
   4   9  11 248.848 32.7675   2
  -4   9 -11 260.494 38.1389   3
   4   9  12-13.2371 9.59014   2
   4  -9  12 10.6922 9.61378   1
  -4   9 -12 3.29036 13.8870   3
   4   9  13 100.975 27.5582   2
  -4   9 -13 99.4821 24.4082   3
   4  -9  13 109.378 25.1054   1
  -4   9 -14-11.3335 16.8547   3
   4  -9  14 5.68846 10.0914   1
   4   9  14 13.9150 12.2555   2
   4   9  15 20.4074 14.5382   2
   4  -9  15 6.66564 7.98797   1
  -4   9 -15 9.27316 15.0776   3
   4  10 -16 114.686 28.8087   3
   4  10 -15 137.029 29.7106   3
   4  10 -14 26.1717 11.0705   3
   4  10 -13 129.723 25.8580   3
   4  10 -12-4.74467 12.4255   3
   4  10 -11 8.48321 7.14800   3
   4  10 -10 130.464 23.0153   3
   4  10  -9 13.6453 9.05080   3
   4  10  -8 298.521 33.4090   3
  -4  10   8 293.418 15.1969   2
   4  10  -7 27.1019 7.93143   3
  -4  10   7 34.7316 5.43695   2
  -4  10   7 8.43847 6.55715   2
  -4  10   6 380.439 20.7351   2
   4  10  -6 381.023 35.8579   3
   4  10  -5 5.09877 6.62205   3
  -4  10   5 7.20666 1.82650   3
   4 -10  -5 12.6087 10.3566   1
  -4  10   5 9.42846 6.93836   2
   4  10  -4 87.8972 16.9917   2
   4  10  -4 97.6758 15.7118   3
  -4  10   4 96.9279 10.4869   3
  -4  10   4 30.3226 6.68202   2
   4 -10  -4 104.841 17.8261   1
  -4  10   4 49.5648 9.52714   3
   4  10  -3 5.30001 8.17584   2
   4  10  -3-0.94300 4.41116   3
  -4 -10   3-3.06183 6.22354   3
  -4  10   3 1.07356 3.59045   3
  -4  10   3-7.28778 12.3309   2
   4 -10  -3-0.66344 4.60839   1
   4 -10  -2 177.366 24.3417   1
   4  10  -2 230.672 26.1332   2
  -4 -10   2 173.126 19.8774   3
  -4  10   2 189.622 18.4209   3
   4  10  -2 188.301 21.3950   3
  -4  10   2 172.974 20.1268   2
   4  10  -1 16.2188 8.13808   3
   4 -10  -1 11.1332 7.93833   1
  -4  10   1 8.42033 3.69008   3
   4  10  -1 5.00641 5.38889   2
  -4  10   1 14.8006 6.56331   2
  -4 -10   1-0.92582 7.65444   3
   4 -10   0 7.15433 5.86590   1
  -4 -10   0 4.23498 5.44984   3
   4  10   0-2.88555 8.15122   2
  -4  10   0 2.54647 4.11625   3
  -4  10   0 12.6200 10.9076   2
   4  10   0 0.38015 3.57620   3
   4  10   1 148.829 21.4765   2
   4 -10   1 108.008 20.0469   1
  -4  10  -1 125.329 19.2752   3
   4  10   1 116.300 15.0352   3
  -4  10  -1 135.142 24.8877   2
  -4 -10  -1 131.739 15.8877   3
   4 -10   2 169.414 24.3678   1
  -4  10  -2 180.606 21.7563   3
   4  10   2 212.229 20.0158   3
   4  10   2 230.949 25.0335   2
  -4 -10  -3 324.945 23.1328   3
   4 -10   3 367.188 35.4317   1
  -4  10  -3 321.692 30.7382   3
   4  10   3 332.974 31.0565   2
  -4 -10  -4 333.694 22.0058   3
  -4  10  -4 325.573 33.7317   3
   4  10   4 312.679 29.6643   2
   4 -10   4 288.099 31.3149   1
   4 -10   5 292.988 33.0985   1
  -4  10  -5 307.243 33.1363   3
   4  10   5 272.453 27.7853   2
   4  10   6 281.167 30.0382   2
  -4  10  -6 263.882 31.3476   3
   4 -10   6 240.525 30.1636   1
   4 -10   7 234.068 32.3434   1
   4  10   7 251.074 31.2325   2
  -4  10  -7 267.630 32.5884   3
   4 -10   8 123.121 19.9727   1
  -4  10  -8 118.218 22.8474   3
   4  10   8 117.829 19.8060   2
  -4  10  -9 59.0118 18.2247   3
   4 -10   9 76.5777 19.8164   1
   4  10   9 85.3853 21.7023   2
   4  10  10 38.7522 18.6570   2
   4 -10  10 9.95317 7.24685   1
  -4  10 -10 10.5103 13.9127   3
   4 -10  11 3.47321 5.87083   1
   4  10  11-17.0684 10.2537   2
  -4  10 -11-2.31484 10.2487   3
  -4  10 -12 6.04799 9.64505   3
   4  10  12-7.15267 13.3746   2
   4 -10  12-0.48853 4.78781   1
   4  10  13 17.4222 19.1187   2
  -4  10 -13 16.7095 4.88382   3
   4 -10  13 22.4419 13.7020   1
   4  10  14 50.9012 19.1509   2
  -4  10 -14-3.01083 16.6289   3
   4  11 -15 32.5643 11.9003   3
   4  11 -14 167.623 30.0413   3
   4  11 -13 24.1287 15.1017   3
   4  11 -12 268.545 36.5006   3
   4  11 -11-0.69005 4.78974   3
   4  11 -10 156.463 27.6336   3
   4  11  -9 33.0974 11.8641   3
   4  11  -8 90.4681 19.1875   3
  -4  11   7 1.67529 3.01992   2
   4  11  -7-0.61095 6.41035   3
   4  11  -6 3.52445 8.00123   3
  -4  11   6-0.40919 4.02605   2
  -4  11   5 24.1012 7.41528   2
  -4  11   5 10.0379 4.37675   3
   4  11  -5 21.5597 9.95855   3
  -4  11   4 187.731 15.9891   3
   4  11  -4 226.106 27.6047   2
   4  11  -4 220.566 25.9035   3
   4  11  -3 1.71577 5.14377   3
   4  11  -3 6.39000 5.99753   2
  -4  11   3 1.06490 2.63837   3
   4 -11  -3-3.86387 3.45943   1
   4 -11  -2 708.166 51.1557   1
   4  11  -2 742.991 51.1748   2
  -4  11   2 813.249 40.6530   3
  -4 -11   2 747.659 44.2261   3
   4  11  -2 744.966 45.5485   3
   4  11  -1 7.17338 8.09062   3
  -4 -11   1 8.34588 5.62685   3
  -4  11   1 9.50018 6.63890   3
   4  11  -1 6.29004 8.15160   2
  -4  11   1 11.7292 5.11677   2
   4 -11  -1 10.7293 11.1706   1
   4  11   0 768.724 42.8565   3
  -4 -11   0 736.425 40.7961   3
  -4  11   0 775.957 44.5327   3
   4  11   0 718.079 49.5437   2
   4 -11   0 781.472 54.8306   1
  -4 -11  -1 8.00912 3.85585   3
   4  11   1 4.38639 3.09657   2
  -4  11  -1 14.1223 5.57380   3
   4 -11   1 8.30650 7.69136   1
   4  11   1 7.75484 4.93098   3
   4 -11   2 342.783 37.8616   1
   4  11   2 343.781 27.0797   3
  -4 -11  -2 328.993 23.9997   3
  -4  11  -2 334.312 30.8230   3
   4  11   2 360.041 34.5635   2
   4 -11   3 28.5125 12.0174   1
  -4  11  -3 30.8815 9.64861   3
  -4 -11  -3 5.74449 5.39554   3
   4  11   3 26.3608 12.8560   2
   4 -11   4 123.010 24.3518   1
  -4  11  -4 118.742 20.6473   3
   4  11   4 104.719 18.1396   2
   4 -11   5 8.02311 11.6614   1
   4  11   5 7.88139 5.25992   2
  -4  11  -5 20.5312 11.2600   3
   4  11   6 8.26144 8.30050   2
   4 -11   6 10.0106 9.91781   1
  -4  11  -6 12.7103 9.68327   3
  -4  11  -7 7.70046 8.14838   3
   4  11   7 25.8138 14.6125   2
   4 -11   7 6.72143 4.47664   1
  -4  11  -8 33.4532 15.4191   3
   4  11   8 49.8316 15.7838   2
   4 -11   8 44.7929 12.9371   1
   4  11   9 81.7613 18.1000   2
  -4  11  -9 77.3128 21.2890   3
   4 -11   9 74.7689 19.2558   1
   4  11  10 139.915 28.6510   2
  -4  11 -10 114.903 27.6044   3
   4 -11  10 107.139 20.3765   1
   4  11  11 21.9844 8.40611   2
  -4  11 -11 22.5168 16.5580   3
   4 -11  11 46.0400 18.3647   1
  -4  11 -12 117.314 26.3545   3
   4  11  12 86.5955 20.3161   2
  -4  11 -13 24.9462 13.4477   3
   4  12 -14 78.3116 18.7971   3
   4  12 -13-0.22870 9.55557   3
   4  12 -12 32.2664 14.0127   3
   4  12 -11 55.9190 17.3050   3
   4  12 -10 4.12323 7.49465   3
   4  12  -9 163.512 29.7905   3
   4  12  -8 1.86184 8.99747   3
   4  12  -7 259.641 33.2176   3
   4  12  -6 16.5710 12.3835   3
  -4  12   6 10.0976 4.16728   2
   4  12  -5 299.618 32.5656   3
  -4  12   5 333.249 24.3422   2
   4  12  -5 309.308 35.6887   2
   4  12  -4 15.1871 8.61044   3
   4  12  -4 27.0268 12.3363   2
   4  12  -3 227.309 26.1380   3
   4  12  -3 220.558 32.3831   2
  -4  12   3 268.069 21.6783   3
   4  12  -2 8.58524 4.20115   3
  -4  12   2 12.8329 8.45963   3
   4  12  -2 5.67290 8.80319   2
   4  12  -1 57.7816 13.9550   3
  -4  12   1 52.3072 11.6477   3
  -4 -12   1 32.7815 9.11875   3
   4  12  -1 46.6936 13.5372   2
  -4  12   0 15.8778 10.8623   3
   4  12   0 13.3155 9.15178   2
   4 -12   0 10.9753 8.42795   1
  -4 -12   0 18.5774 8.90689   3
   4  12   0 14.0209 8.49039   3
   4  12   1 31.4093 10.8277   3
   4  12   1 25.7678 9.74151   2
  -4  12  -1 20.7254 8.76270   3
   4 -12   1 22.1370 7.48522   1
   4  12   2 113.163 20.7847   2
  -4  12  -2 74.1130 15.8033   3
   4 -12   2 71.1023 18.3589   1
   4  12   2 61.0623 10.3583   3
   4  12   3 108.970 18.6850   2
  -4  12  -3 94.9322 19.0362   3
   4 -12   3 95.0161 20.0598   1
   4  12   4 145.426 22.4444   2
  -4  12  -4 148.725 22.1481   3
   4 -12   4 141.980 25.2402   1
  -4  12  -5 150.511 25.8538   3
   4 -12   5 136.241 23.1964   1
   4  12   5 130.023 21.6555   2
  -4  12  -6 54.2211 12.8192   3
   4  12   6 67.5797 19.0608   2
   4 -12   6 58.0361 16.1709   1
   4  12   7 188.374 27.8867   2
  -4  12  -7 163.487 26.6885   3
   4 -12   7 177.134 29.8210   1
   4 -12   8 36.2770 13.3969   1
  -4  12  -8 1.60271 15.2879   3
   4  12   8 1.18767 9.99035   2
  -4  12  -9 41.8320 13.1079   3
   4  12   9 58.4583 18.8364   2
   4  12  10 5.45467 5.43474   2
  -4  12 -10-7.92157 15.5586   3
   4  12  11 10.4927 15.0946   2
  -4  12 -11 1.09957 7.03646   3
  -4  12 -12 15.9294 18.1576   3
   4  13 -13 164.578 31.5903   3
   4  13 -12 23.6733 10.2567   3
   4  13 -11 229.868 33.5024   3
   4  13 -10 30.7234 14.3034   3
   4  13  -9 106.917 23.7491   3
   4  13  -8 44.2204 15.3068   3
   4  13  -7 49.5329 11.5011   3
   4  13  -6 4.49484 11.0167   2
   4  13  -6-8.35092 8.15189   3
   4  13  -5 34.2827 11.3670   3
   4  13  -5 24.8231 5.01383   2
   4  13  -4-1.26868 5.87777   3
  -4  13   4 0.67336 3.90969   2
   4  13  -4 2.15200 7.78622   2
   4  13  -3 228.142 30.9497   2
   4  13  -3 200.101 25.0659   3
   4  13  -2 15.0080 12.0661   2
   4  13  -2-7.23823 8.36016   3
  -4  13   1 320.621 29.6217   3
   4  13  -1 316.684 34.8755   2
   4  13  -1 313.734 28.1441   3
   4  13   0-1.62338 2.85572   3
  -4  13   0-24.0857 8.13420   3
   4  13   0-4.59319 9.46108   2
  -4  13  -1 165.771 23.3108   3
   4  13   1 181.485 25.4040   2
   4  13   1 205.790 22.7510   3
   4  13   2 12.0750 10.6553   2
  -4  13  -2 8.03498 11.7720   3
   4  13   3 111.039 23.2517   2
  -4  13  -3 135.043 21.2804   3
   4  13   4 20.2041 12.9034   2
  -4  13  -4 9.04761 10.4094   3
   4  13   5 2.06719 7.94111   2
  -4  13  -5-3.56428 11.8086   3
   4  13   6 4.39280 6.19662   2
  -4  13  -6 8.53477 11.7266   3
  -4  13  -7 34.6815 15.8157   3
   4  13   7 41.1188 15.7725   2
  -4  13  -8 28.1765 15.5212   3
   4  13   8 38.2104 13.7149   2
  -4  13  -9 138.812 31.4164   3
   4  13   9 96.6321 23.4728   2
   4  13  10 85.6412 24.9808   2
  -4  13 -10 41.0314 21.2249   3
  -4  13 -11 120.760 31.7094   3
   4  14 -12-2.09281 10.5369   3
   4  14 -11 31.4424 14.4782   3
   4  14 -10 150.756 28.3223   3
   4  14  -9-1.92301 4.27089   3
   4  14  -8 289.250 36.7362   3
   4  14  -7 60.6644 17.7355   3
   4  14  -7 69.4340 21.4465   2
   4  14  -6 396.299 44.5884   2
   4  14  -6 352.678 38.1912   3
   4  14  -5 15.3296 11.2875   2
   4  14  -5 17.0393 11.3101   3
   4  14  -4 369.381 36.7449   3
   4  14  -4 327.085 42.0345   2
   4  14  -3 5.01192 7.66833   3
   4  14  -3 3.69404 8.09828   2
   4  14  -2 117.507 23.0086   2
   4  14  -2 158.094 22.5735   3
   4  14  -1-0.49088 10.0357   2
   4  14   0 19.1974 15.4499   2
   4  14   1 18.9855 13.0113   2
   4  14   2 22.5797 8.13114   2
  -4  14  -2 17.3322 3.40706   3
   4  14   3 40.1091 13.4925   2
  -4  14  -3 42.4312 16.2383   3
   4  14   4 143.526 25.5468   2
  -4  14  -4 97.3958 19.3031   3
   4  14   5 86.2493 19.0462   2
  -4  14  -5 58.4154 15.8270   3
   4  14   6 141.089 28.3536   2
  -4  14  -6 116.880 26.2816   3
  -4  14  -7 35.7184 19.6325   3
   4  14   7 34.7399 13.5491   2
  -4  14  -8 53.9119 19.5380   3
   4  14   8 115.234 24.5937   2
  -4  14  -9-6.94944 7.74603   3
  -4  14 -10-1.11140 12.7695   3
   4  15 -10 98.2989 24.5678   3
   4  15  -9 3.35956 10.9894   3
   4  15  -8 36.2412 9.87256   3
   4  15  -7-0.11930 6.60517   3
   4  15  -6-11.4473 19.6248   3
   4  15  -6 0.42350 11.6516   2
   4  15  -5 0.82940 9.70064   3
   4  15  -5 19.3024 16.5332   2
   4  15  -4 45.3616 14.8117   2
   4  15  -3 13.5634 10.7608   2
   4  15  -2 183.677 30.2049   2
   4  15  -1 26.9985 5.29253   2
   4  15   0 181.533 31.0563   2
   4  15   1-0.59356 17.0167   2
   4  15   2 74.4421 17.5544   2
   4  15   3-4.13014 8.89127   2
   4  15   4 15.4077 15.9902   2
   4  15   5 14.8288 16.3768   2
  -4  15  -5-0.57035 13.0231   3
  -4  15  -6 42.3788 22.1906   3
   4  15   6 32.0955 17.3614   2
  -4  15  -7 30.5198 13.5556   3
  -4  15  -8 101.626 27.6231   3
  -4  15  -9 25.4897 14.0033   3
   4  16  -2-5.11362 16.5708   2
   4  16  -1 47.6903 16.0064   2
   4  16   0-10.9733 10.8052   2
   4  16   2-50.0952 15.3996   2
   4  16   3 54.7181 16.8652   2
   4  16   4-1.70162 8.20316   2
   5   0 -23-10.8872 17.8517   3
   5   0 -22 63.9710 23.5057   3
   5   0 -21-18.0695 13.3790   3
   5   0 -20 18.6674 13.4144   3
   5   0 -19-5.57024 13.0804   3
   5   0 -18 76.3835 19.5510   3
   5   0 -17-6.20027 4.27601   3
   5   0 -17 3.04745 5.53941   2
   5   0 -16 187.177 28.0732   2
   5   0 -16 362.038 35.7000   3
   5   0 -15 10.0563 5.84474   3
   5   0 -15-7.74123 5.72784   1
   5   0 -15-7.31352 14.8967   2
   5   0 -14 817.790 32.4326   1
   5   0 -14 758.112 48.8688   3
   5   0 -13 0.02816 6.94416   3
  -5   0  13-5.81215 5.43587   3
   5   0 -12 383.567 31.4564   3
  -5   0  12 397.773 32.1466   3
   5   0 -11 3.45928 5.35275   3
  -5   0  11 5.67577 6.48586   3
  -5   0  10 257.939 22.8414   3
   5   0 -10 229.257 22.4065   3
   5   0  -9 2.98312 6.93720   3
  -5   0   9 1.84107 3.29065   3
   5   0  -8 88.3036 12.8355   3
  -5   0   8 98.2949 13.6629   3
   5   0  -8 97.7413 9.96422   2
  -5   0   7 3.34834 4.21238   3
   5   0  -7-1.65906 4.60728   3
   5   0  -7-2.00147 2.92703   2
   5   0  -6 51.7507 9.76403   3
  -5   0   6 54.0196 8.49539   3
   5   0  -6 53.8267 7.16454   2
   5   0  -5 3.60375 3.91106   3
   5   0  -5 0.70828 1.84499   2
  -5   0   5 2.48977 3.78852   3
  -5   0   4 2491.95 61.9814   2
   5   0  -4 2592.56 74.5055   3
   5   0  -4 2522.68 63.1615   2
  -5   0   4 2445.57 69.9583   3
  -5   0   3-0.64328 1.93183   3
  -5   0   3-0.37737 1.86409   2
   5   0  -3 1.17963 3.47199   3
   5   0  -3 2.09243 4.90277   2
  -5   0   2 1818.39 57.8007   3
   5   0  -2 1891.53 59.1139   2
   5   0  -2 1867.58 61.0215   3
  -5   0   2 1864.31 52.5169   2
  -5   0   1 0.29893 1.98111   2
  -5   0   1 3.47903 3.66838   3
   5   0  -1 27.8084 12.4582   2
  -5   0   0 562.574 29.2498   2
  -5   0   0 582.698 31.6956   3
   5   0   0 662.508 38.6693   2
   5   0   1 25.6581 13.2429   2
  -5   0  -1 3.40114 2.47049   2
   5   0   2 1599.61 67.6834   2
  -5   0  -2 1228.04 53.3399   2
   5   0   3 42.6672 17.7424   2
  -5   0  -3 27.2156 11.9537   2
   5   0   4 31.3784 10.8861   2
  -5   0  -4 18.4541 7.78767   2
   5   0   5 2.50030 10.8096   2
  -5   0  -5 0.39115 4.84617   2
  -5   0  -6 44.5716 11.5796   2
   5   0   6 26.9417 11.6563   2
  -5   0  -7-6.01495 6.61617   2
   5   0   7-4.80866 11.8805   2
  -5   0  -8 248.659 30.8602   2
   5   0   8 274.262 33.9601   2
   5   0   9 3.29827 5.43159   2
   5   0  10 505.649 49.6091   2
   5   0  11 4.55419 8.88831   2
   5   0  12 138.504 30.9052   2
   5   0  13 13.1025 6.30519   2
  -5   0 -14 6.24273 8.31049   3
   5   0  14 7.66373 7.37449   2
  -5   0 -15-4.15150 9.07850   3
  -5   0 -16 28.7175 12.6886   3
   5   0  16 2.60012 5.65379   1
  -5   0 -17-4.57400 8.65802   3
  -5   0 -18 88.1060 19.0281   3
  -5   0 -19 6.58055 14.7627   3
  -5   0 -20 135.013 33.2271   3
   5  -1 -23 8.15142 8.63803   3
   5   1 -23 1.61974 14.2578   3
   5  -1 -22 35.9438 4.32717   3
   5   1 -22 45.6056 13.5623   3
   5   1 -21 97.0209 24.0754   3
   5  -1 -21 97.9896 22.2751   3
   5  -1 -20 186.467 28.1824   3
   5   1 -20 188.663 32.5473   3
   5  -1 -19 162.116 25.2477   3
   5   1 -19 109.687 21.5917   3
   5  -1 -18 306.378 35.8352   3
   5   1 -18 295.762 35.8410   3
   5  -1 -17 149.193 23.2949   3
   5   1 -17 145.754 23.1654   3
   5  -1 -16 129.438 20.3326   3
   5   1 -16 115.148 17.2055   1
   5   1 -16 107.581 21.1351   3
   5   1 -16-22.4575 23.9406   2
   5  -1 -16 75.1989 20.3265   2
   5  -1 -15 193.699 25.1595   3
   5   1 -15 176.696 26.0908   3
   5   1 -15 187.208 15.8182   1
   5  -1 -15 196.676 25.9856   2
   5   1 -14 124.719 12.8013   1
   5  -1 -14 113.935 17.0618   3
   5   1 -14 110.824 19.1332   3
   5  -1 -14 44.3938 13.4623   2
  -5   1  14 124.551 18.6954   3
   5  -1 -13 9.78265 7.00004   3
   5   1 -13 9.72407 6.37014   3
  -5   1  13 12.7165 7.38789   3
   5  -1 -13 13.4202 7.21058   2
  -5   1  12 10.2434 3.47445   3
  -5  -1  12 1.20190 4.11788   3
   5   1 -12 6.25012 3.02373   3
   5  -1 -12 7.73730 4.31157   3
   5   1 -11 176.123 20.8148   3
  -5   1  11 190.092 20.6918   3
  -5  -1  11 180.826 21.0563   3
   5  -1 -11 198.766 21.5670   3
   5   1 -10 14.0285 7.07434   3
   5  -1 -10 6.49453 3.91109   3
  -5   1  10 10.8435 3.48421   3
  -5  -1  10 7.16470 4.66611   3
   5  -1  -9 71.5524 12.6663   3
   5   1  -9 60.2999 11.3722   3
  -5   1   9 65.4669 10.3488   3
   5  -1  -9 63.9473 7.10369   2
  -5  -1   9 69.9752 14.0150   3
   5  -1  -8 132.782 15.6144   3
   5   1  -8 129.285 17.4768   3
  -5   1   8 137.845 15.4083   3
   5  -1  -8 135.375 10.3107   2
  -5  -1   8 149.011 16.9783   3
  -5   1   7 706.001 34.4860   3
   5  -1  -7 760.454 26.2599   2
  -5  -1   7 732.123 37.9036   3
   5   1  -7 750.901 31.5725   2
   5   1  -7 657.855 37.4554   3
   5  -1  -7 717.298 35.8506   3
  -5   1   6 144.828 15.2206   3
  -5  -1   6 152.782 15.9865   3
   5   1  -6 183.230 14.6263   2
   5  -1  -6 161.243 11.1375   2
   5  -1  -6 164.521 16.7594   3
   5   1  -6 138.975 16.0663   3
   5   1  -5 232.544 19.8472   3
  -5  -1   5 242.165 20.4909   3
  -5   1   5 242.316 18.2083   3
  -5   1   5 234.709 13.8161   2
   5  -1  -5 261.012 15.1824   2
   5  -1  -5 263.897 19.7417   3
   5   1  -5 253.931 17.5672   2
  -5  -1   4 0.30850 4.23692   3
   5  -1  -4 2.69090 2.66104   3
   5   1  -4 2.05071 3.02106   2
   5   1  -4 2.03883 3.10635   3
  -5   1   4-0.01590 1.73605   2
   5  -1  -4-1.61837 4.14616   2
  -5   1   4-0.19260 2.68371   3
   5  -1  -3 180.844 15.1282   2
  -5   1   3 165.648 14.7256   3
  -5  -1   3 186.651 14.8633   2
  -5  -1   3 160.530 15.3813   3
   5  -1  -3 176.403 17.1076   3
   5   1  -3 175.674 16.8594   3
   5   1  -3 178.003 15.1952   2
  -5   1   3 163.748 11.9668   2
   5  -1  -2 387.027 26.4240   2
   5   1  -2 392.297 23.1409   2
  -5   1   2 397.213 20.5774   2
  -5  -1   2 402.935 22.4316   2
   5   1  -2 404.304 25.5690   3
  -5  -1   2 377.430 23.3827   3
  -5   1   2 403.488 24.0765   3
   5  -1  -1 221.602 22.2495   2
  -5   1   1 268.688 17.9178   2
  -5  -1   1 217.222 18.9790   3
   5   1  -1 254.214 20.5861   2
  -5  -1   1 273.341 18.6645   2
  -5   1   1 231.235 18.8755   3
  -5  -1   0 307.405 22.2236   3
  -5   1   0 250.412 20.9300   2
  -5  -1   0 341.227 21.8560   2
   5   1   0 443.926 31.4787   2
   5  -1   0 357.310 28.2128   2
   5   1   1 536.231 35.6463   2
  -5   1  -1 491.060 30.8882   2
  -5  -1  -1 513.157 30.1904   3
  -5  -1  -1 559.942 28.8014   2
   5  -1   1 527.468 37.1162   2
   5   1   2 441.374 35.1128   2
  -5   1  -2 411.724 30.3599   2
  -5  -1  -2 633.930 34.1402   2
   5  -1   2 431.898 34.4653   2
   5   1   3 1718.88 76.2091   2
  -5  -1  -3 1343.77 55.7286   2
   5  -1   3 1679.82 72.1757   2
  -5   1  -3 1740.85 69.8710   2
   5   1   4 406.645 35.3025   2
  -5  -1  -4 381.876 28.7941   2
   5  -1   4 428.865 36.8630   2
  -5   1  -4 229.871 34.5593   2
  -5  -1  -5 828.779 47.1341   2
  -5   1  -5 1031.05 60.2048   2
   5  -1   5 1033.80 60.2749   2
   5   1   5 1127.09 62.4297   2
  -5   1  -6 442.904 38.8473   2
  -5  -1  -6 328.959 29.5088   2
   5  -1   6 444.720 40.7315   2
   5   1   6 459.288 39.1323   2
  -5   1  -7 347.138 36.2900   2
  -5  -1  -7 352.112 32.6237   2
   5  -1   7 326.411 35.7931   2
   5   1   7 325.550 35.5772   2
  -5   1  -8 20.4557 14.1359   2
   5  -1   8 0.15135 8.87014   2
  -5  -1  -8 16.5745 10.2373   2
   5   1   8 8.01328 6.40608   2
   5   1   9 85.0788 20.5122   2
   5  -1   9 49.4152 17.4396   2
   5   1  10 48.4232 16.1990   2
   5  -1  10 31.8140 13.0531   2
   5   1  11-2.84664 9.46710   2
   5  -1  11-12.6651 14.2206   2
   5  -1  12 196.632 36.7464   2
   5   1  12 145.199 25.7976   2
   5   1  13 119.953 29.8601   2
  -5   1 -14 294.359 38.2024   3
   5   1  14 260.775 42.1854   2
  -5   1 -15 164.781 28.9935   3
  -5  -1 -15 183.112 28.8170   3
   5   1  15 153.523 35.1260   2
   5  -1  16 149.831 21.8119   1
  -5   1 -16 149.734 31.8188   3
  -5  -1 -16 98.1278 20.4700   3
  -5   1 -17 102.978 24.8762   3
  -5  -1 -17 103.328 23.1765   3
  -5   1 -18 68.1018 14.8319   3
  -5  -1 -18 96.7654 26.2716   3
  -5   1 -19 27.1938 7.20732   3
  -5  -1 -19 23.0589 9.88399   3
  -5  -1 -20 10.0770 12.2356   3
   5  -2 -22-4.67718 18.0475   3
   5   2 -22 9.72840 6.51854   3
   5  -2 -21 2.70144 12.6027   3
   5   2 -21 0.89684 11.4191   3
   5  -2 -20-1.23092 5.52099   3
   5   2 -20-1.87024 9.27965   3
   5  -2 -19 7.17722 3.94925   3
   5   2 -19-7.51402 6.32544   3
   5  -2 -18 0.10831 3.31021   3
   5   2 -18-3.79756 8.53316   3
   5  -2 -17 168.027 23.8110   3
   5   2 -17 169.828 27.8805   3
   5  -2 -16 9.37663 3.94752   3
   5   2 -16 18.3567 6.94960   1
   5   2 -16 12.6851 9.84609   3
   5  -2 -15 526.069 38.6318   3
   5   2 -15 561.412 32.1854   1
  -5   2  15 595.832 41.4695   3
   5  -2 -15 502.200 39.3432   2
   5   2 -15 527.855 45.6674   3
   5  -2 -14 148.398 20.1549   3
   5   2 -14 174.213 24.8903   3
  -5   2  14 183.376 21.5457   3
   5  -2 -14 190.984 23.0990   2
   5   2 -14 135.177 15.1940   1
   5  -2 -13 432.415 32.3832   3
  -5   2  13 442.608 32.3837   3
   5  -2 -13 578.226 34.9390   2
   5   2 -13 412.149 37.3664   3
   5  -2 -12 11.2313 4.56181   3
   5   2 -12 14.5399 6.38765   3
  -5   2  12 13.2272 6.36103   3
   5  -2 -12 29.3571 6.70278   2
   5   2 -11 381.692 32.6410   3
   5  -2 -11 392.533 28.2450   3
  -5   2  11 398.154 28.6015   3
   5  -2 -11 414.200 17.8398   2
  -5  -2  11 435.424 34.3886   3
   5  -2 -10 5.96587 5.30655   3
  -5   2  10 6.06411 2.52781   3
  -5  -2  10-1.97467 3.86534   3
   5  -2 -10-0.98648 1.94819   2
   5   2 -10-1.10981 4.81136   3
   5  -2  -9 156.262 16.2044   3
   5   2  -9 138.058 17.9136   3
  -5   2   9 141.608 15.4786   3
  -5  -2   9 171.020 20.4165   3
   5  -2  -9 156.354 9.65575   2
  -5  -2   8 134.673 17.5526   3
   5   2  -8 117.177 15.7820   3
  -5   2   8 143.152 14.6176   3
   5  -2  -8 130.498 8.46994   2
   5  -2  -8 141.800 15.5827   3
   5   2  -7 20.9012 8.85378   3
  -5   2   7 19.9410 6.56373   3
  -5  -2   7 15.2079 6.18974   3
   5  -2  -7 17.6650 3.36863   2
   5  -2  -7 23.5966 6.81104   3
  -5   2   6 38.3891 7.47297   3
   5   2  -6 39.3912 6.97897   3
   5  -2  -6 37.9014 6.62105   3
  -5  -2   6 52.5583 10.3503   3
   5  -2  -6 48.7074 6.37896   2
   5   2  -6 44.8166 7.88545   2
   5   2  -5 760.484 33.8498   2
  -5   2   5 726.467 32.0916   3
   5  -2  -5 729.379 28.3804   2
   5   2  -5 734.466 37.6490   3
  -5   2   5 737.667 23.6644   2
   5  -2  -5 769.598 35.5637   3
  -5  -2   5 738.645 36.9418   3
   5   2  -4 13.3127 5.47795   3
  -5   2   4 10.3746 1.74334   3
  -5  -2   4 7.42886 2.94259   3
  -5   2   4 10.7203 2.97683   2
   5  -2  -4 19.3415 6.70216   2
   5  -2  -4 8.75564 5.37965   3
   5   2  -4 11.1402 4.66161   2
   5  -2  -3 2768.62 76.8914   2
  -5   2   3 2777.29 73.8927   3
  -5  -2   3 2707.76 77.3820   3
   5   2  -3 2733.99 74.6748   2
  -5  -2   3 2857.37 73.5233   2
  -5   2   3 2798.29 64.5961   2
   5   2  -3 2843.53 81.0047   3
   5   2  -2 3.94542 5.78391   3
  -5   2   2 2.21486 2.38464   3
   5  -2  -2 61.4059 18.7469   2
   5   2  -2 3.61316 4.98711   2
  -5   2   2 29.7353 8.44541   2
  -5  -2   2 1.14503 3.36046   2
  -5  -2   2 6.37060 4.73593   3
  -5  -2   1 1932.40 57.9676   2
  -5   2   1 1885.16 58.1102   2
   5   2  -1 1455.58 53.7793   2
   5   2  -1 1893.12 61.0989   3
  -5  -2   1 1712.75 56.5702   3
   5  -2  -1 1819.91 64.2913   2
  -5  -2   0 83.8465 12.2976   3
   5   2   0 113.487 15.2360   2
  -5  -2   0 92.0614 12.3988   2
   5  -2   0 116.805 19.5930   2
  -5   2   0 85.9905 14.7985   2
  -5   2  -1 567.799 41.8765   2
   5   2   1 941.002 44.7414   2
  -5  -2  -1 911.693 39.3959   3
  -5  -2  -1 854.805 37.5859   2
   5  -2   1 976.871 49.6826   2
  -5  -2  -2 17.0827 4.85472   2
  -5  -2  -2 10.9542 5.36590   3
  -5   2  -2 25.4456 7.12253   2
   5   2   2 20.6152 9.43424   2
   5  -2   2 17.1401 7.11479   2
  -5   2  -3 279.975 27.6268   2
  -5  -2  -3 283.806 21.8458   2
   5   2   3 345.314 31.4888   2
   5  -2   3 289.154 30.2693   2
  -5   2  -4 136.509 19.8023   2
   5   2   4 86.5104 23.9654   2
   5  -2   4 158.242 24.4883   2
  -5  -2  -4 52.6898 12.2135   2
  -5   2  -5 2.47556 4.92526   2
   5   2   5 1.02680 6.66373   2
  -5  -2  -5 4.80123 3.06965   2
   5  -2   5-2.40194 9.11550   2
   5  -2   6 62.7211 17.0851   2
   5   2   6 63.1056 14.8680   2
  -5   2  -6 36.6675 9.02645   2
  -5  -2  -6 51.4064 11.7410   2
   5   2   7 135.786 23.6631   2
  -5   2  -7 131.365 22.3201   2
  -5  -2  -7 173.751 21.0129   2
   5  -2   7 130.842 22.1147   2
   5   2   8 70.0955 19.0942   2
  -5  -2  -8 57.2171 12.9847   2
   5  -2   8 37.0143 12.4085   2
   5   2   9 136.928 23.8703   2
   5  -2   9 185.879 30.5364   2
   5   2  10 20.2778 13.1984   2
   5  -2  10 14.2928 9.36173   2
   5  -2  11 352.813 45.9135   2
   5   2  11 301.866 39.9817   2
   5   2  12 62.4760 17.7154   2
   5   2  13 47.3925 22.7318   2
   5   2  14 35.0782 19.0388   2
  -5   2 -14 13.4573 9.16746   3
  -5   2 -15 4.97407 12.3386   3
   5  -2  15-0.31598 5.75374   1
  -5  -2 -15-0.30011 5.97454   3
   5   2  15 8.99634 13.7928   2
   5  -2  16-10.0379 6.09841   1
  -5   2 -16-8.17931 12.4689   3
  -5  -2 -16-14.1582 14.6588   3
   5   2  16-24.2651 22.1953   2
  -5  -2 -17 113.236 21.7878   3
  -5   2 -17 116.261 26.9471   3
  -5   2 -18-3.72953 7.70097   3
  -5  -2 -18-10.9855 11.7616   3
  -5   2 -19 105.281 26.8081   3
  -5  -2 -19 153.216 27.0071   3
  -5  -2 -20-10.0772 7.06239   3
   5   3 -22 66.6172 25.5876   3
   5   3 -21 77.5256 24.3830   3
   5  -3 -21 69.9174 16.8623   3
   5   3 -20 137.389 30.3144   3
   5  -3 -20 90.2878 17.9362   3
   5  -3 -19 138.811 20.1445   3
   5   3 -19 163.127 29.6559   3
   5  -3 -18 186.416 23.5390   3
   5   3 -18 164.846 27.1355   3
   5   3 -17 42.6574 14.7986   3
   5  -3 -17 46.7702 11.3893   3
   5   3 -16 127.134 15.2143   1
   5  -3 -16 119.240 18.1584   3
   5   3 -16 119.728 23.5285   3
   5  -3 -15 82.0547 14.3078   2
   5  -3 -15 91.4295 15.2297   3
   5   3 -15 80.8606 19.4237   3
  -5   3  15 77.3248 13.6248   3
   5  -3 -14 41.9060 10.8911   3
   5   3 -14 28.1395 9.44120   3
  -5   3  14 30.0818 8.03570   3
   5   3 -14 52.0351 11.8868   1
   5  -3 -13 66.3445 12.3636   3
   5   3 -13 55.0069 14.6099   3
   5  -3 -13 50.5096 5.10272   2
  -5   3  13 62.7461 11.5115   3
   5   3 -13 45.9463 9.94017   1
   5  -3 -12 78.1829 5.82057   2
   5   3 -12 102.936 18.4033   3
  -5   3  12 108.882 14.3587   3
   5  -3 -12 120.327 15.2987   3
   5  -3 -11 1.95641 5.16616   3
   5   3 -11 2.72759 9.22951   3
   5  -3 -11-1.03594 1.00214   2
  -5   3  11 7.08684 5.52938   3
  -5   3  10 369.718 26.1940   3
  -5  -3  10 407.486 33.3702   3
   5  -3 -10 363.086 24.7803   3
   5   3 -10 401.767 33.7484   3
   5  -3  -9 2.98003 3.47127   3
   5   3  -9 6.93364 4.11064   3
  -5   3   9 8.43950 2.87570   3
  -5  -3   9 7.42975 6.99798   3
  -5   3   8 913.128 38.6812   3
   5  -3  -8 951.183 40.3615   3
  -5  -3   8 982.830 49.0772   3
   5   3  -8 878.091 47.3893   3
   5  -3  -7 28.5697 5.94405   3
   5   3  -7 31.2502 8.87645   3
  -5   3   7 35.3642 8.02421   3
  -5  -3   7 36.2032 8.98867   3
  -5   3   6 341.852 21.1256   3
  -5  -3   6 352.426 26.1473   3
   5  -3  -6 348.778 22.9130   3
   5   3  -6 314.454 22.8724   2
   5   3  -6 322.661 25.3733   3
   5  -3  -6 193.687 15.7645   2
  -5   3   5 5.73413 2.61697   3
  -5  -3   5 4.73095 4.65558   3
  -5   3   5 4.46691 2.03783   2
   5   3  -5 4.54855 4.39483   3
   5   3  -5 1.63404 3.81870   2
   5  -3  -5 6.46868 4.44798   2
  -5  -3   4 605.374 33.7775   3
   5   3  -4 646.275 32.4291   2
   5   3  -4 667.082 35.5138   3
  -5   3   4 686.104 23.6874   2
   5  -3  -4 666.710 29.6094   2
  -5   3   4 647.281 29.5447   3
   5  -3  -3 62.2435 9.07719   2
   5   3  -3 56.9303 10.2818   3
  -5  -3   3 59.0185 10.5963   3
  -5   3   3 53.6417 7.82005   3
   5   3  -3 57.2304 9.84680   2
  -5   3   3 46.3801 7.21032   2
  -5   3   2 10.3551 4.78566   3
   5   3  -2 12.5504 6.89591   2
  -5   3   2 19.1868 5.94634   2
  -5  -3   2 16.6775 4.89167   2
   5   3  -2 13.8964 4.34442   3
  -5  -3   2 11.3230 4.76369   3
   5  -3  -2 12.0864 5.20006   2
  -5  -3   1 411.982 25.0015   3
  -5   3   1 367.441 28.0468   2
   5   3  -1 403.358 26.2621   3
  -5  -3   1 369.342 23.8383   2
   5   3  -1 399.151 26.0558   2
   5  -3  -1 440.963 30.2664   2
   5  -3   0-1.41014 5.66807   2
   5   3   0 0.13233 3.47974   2
  -5   3   0 3.20649 6.51007   2
   5   3   0 0.04229 5.56588   3
  -5  -3   0 3.14610 1.97817   2
  -5  -3   0-0.87912 3.67909   3
  -5   3  -1 114.754 14.6346   2
   5   3   1 178.827 19.7279   2
  -5  -3  -1 118.122 13.0287   3
   5  -3   1 122.394 18.4796   2
  -5  -3  -1 140.885 14.5235   2
  -5   3  -2 608.515 39.4921   2
   5   3   2 755.031 41.1754   2
   5  -3   2 617.269 43.1458   2
  -5  -3  -2 717.729 35.3438   2
  -5  -3  -2 580.648 31.6420   3
  -5   3  -3 553.109 39.5043   2
   5  -3   3 549.026 42.5908   2
  -5  -3  -3 630.461 33.5852   2
   5   3   3 549.580 38.1435   2
  -5  -3  -3 562.066 31.4726   3
   5   3   4 826.253 49.7786   2
  -5  -3  -4 784.457 38.8087   2
   5  -3   4 878.520 55.5796   2
  -5   3  -4 741.330 47.8247   2
  -5  -3  -4 828.582 39.4352   3
   5   3   5 295.017 38.3462   2
  -5  -3  -5 237.782 21.8253   2
   5  -3   5 306.595 33.8157   2
  -5   3  -5 340.182 32.3649   2
   5   3   6 476.732 42.9749   2
  -5  -3  -6 453.519 31.7650   2
   5  -3   6 456.936 44.9423   2
  -5   3  -6 430.737 38.9929   2
  -5   3  -7 132.366 25.0099   2
   5   3   7 97.6805 17.8939   2
   5  -3   7 107.339 23.1309   2
  -5  -3  -7 20.1254 10.7623   2
   5   3   8 78.2251 19.8353   2
   5  -3   8 81.2657 20.2510   2
  -5  -3  -8 86.6912 14.7876   2
   5   3   9 76.1874 18.1398   2
   5   3  10 1.94285 9.26987   2
   5   3  11 13.6645 7.98730   2
   5   3  12 73.1037 21.0311   2
   5   3  13 62.7196 19.2312   2
  -5   3 -13 57.2382 18.7101   3
   5  -3  13 61.4995 19.4124   1
  -5   3 -14 118.675 26.8763   3
   5  -3  14 143.650 23.1978   1
   5   3  14 171.433 35.7239   2
  -5   3 -15 139.841 28.9997   3
   5   3  15 88.8169 26.9929   2
   5  -3  15 161.052 23.2179   1
  -5  -3 -15 138.057 24.1166   3
   5  -3  16 128.458 18.2297   1
  -5   3 -16 101.651 28.2771   3
  -5  -3 -16 121.219 23.3276   3
   5   3  16 88.8407 29.3831   2
  -5   3 -17 39.7420 21.3234   3
   5  -3  17 102.698 20.0461   1
  -5  -3 -17 60.5787 19.5493   3
   5   3  17 45.1449 27.8707   2
  -5   3 -18 46.5471 17.4052   3
  -5  -3 -18 52.0574 13.0644   3
  -5  -3 -19 4.10165 5.78126   3
   5   4 -21 16.2065 14.4167   3
   5   4 -20 7.90013 12.2671   3
   5   4 -19 2.55805 8.00638   3
   5  -4 -19-0.23165 9.60722   3
   5  -4 -18 22.6413 7.36184   3
   5   4 -18 27.2963 6.79446   3
   5   4 -17 8.94015 14.0075   3
   5  -4 -17-2.60642 3.75699   3
   5  -4 -16 226.512 23.3583   3
   5   4 -16 225.597 33.0944   3
   5   4 -16 161.540 20.9379   1
   5  -4 -15 62.9339 13.3235   3
   5   4 -15 54.0122 15.8124   3
   5   4 -15 38.6191 10.5933   1
  -5   4  15 45.8147 10.5500   3
   5  -4 -14 380.692 27.8475   3
   5   4 -14 236.629 25.1385   1
   5   4 -14 377.294 39.6199   3
  -5   4  14 407.493 29.3124   3
   5  -4 -13 112.445 15.0711   3
   5   4 -13 103.842 19.4911   3
  -5   4  13 114.613 15.1826   3
   5   4 -13 81.6215 11.6067   1
   5  -4 -12 561.562 31.6764   3
  -5   4  12 533.243 31.7784   3
   5  -4 -12 412.386 17.3028   1
   5   4 -12 531.236 43.1148   3
   5  -4 -11 20.2507 6.42642   3
   5   4 -11 29.3413 8.43688   3
  -5   4  11 24.7282 6.47506   3
   5   4 -10 105.673 17.2104   3
  -5   4  10 106.548 12.8961   3
   5  -4 -10 108.083 13.1834   3
   5  -4  -9 20.3213 5.76489   3
  -5   4   9 34.6706 7.21818   3
   5   4  -9 22.8567 8.45056   3
  -5  -4   9 25.7383 10.7212   3
   5  -4  -8 10.0306 5.23840   3
   5   4  -8 7.71900 3.93879   3
  -5   4   8 10.7371 2.04745   3
  -5  -4   8 9.68345 5.64242   3
  -5  -4   7 54.2316 11.6206   3
  -5   4   7 71.7131 9.28088   3
   5  -4  -7 56.8518 9.06647   3
   5   4  -7 66.7788 12.7023   3
   5   4  -6 336.511 27.7084   3
  -5  -4   6 358.848 28.0423   3
  -5   4   6 324.963 19.8381   3
   5   4  -5 68.6154 11.8515   3
   5   4  -5 83.2991 12.4915   2
  -5  -4   5 70.7253 11.8112   3
  -5   4   5 73.2532 5.79055   2
  -5   4   5 73.0997 9.31153   3
   5   4  -4 870.576 42.9028   3
  -5   4   4 988.090 32.1057   2
  -5  -4   4 868.883 42.5093   3
   5   4  -4 777.103 39.3105   2
  -5   4   4 879.603 35.1736   3
  -5  -4   3 2.75010 3.02040   3
  -5   4   3 2.58551 4.93422   2
   5   4  -3 4.83467 5.43581   2
   5   4  -3 1.46140 5.55730   3
   5  -4  -3 0.03392 4.94456   2
  -5   4   3 3.14815 1.76990   3
   5   4  -2 2130.27 67.2168   2
  -5  -4   2 1825.03 62.2387   3
  -5   4   2 1861.17 61.8996   2
   5  -4  -2 2029.25 72.3914   2
   5   4  -2 1910.38 64.4671   3
   5   4  -1 7.79748 6.19232   3
  -5  -4   1 9.90972 5.26918   2
  -5  -4   1 7.35013 4.86604   3
   5   4  -1 16.0675 10.0436   2
   5  -4  -1 36.2021 13.5457   2
  -5   4   1 65.2428 14.0710   2
  -5  -4   0 1461.37 53.6692   2
   5   4   0 1425.64 53.2915   3
   5   4   0 1223.51 52.3963   2
   5  -4   0 1530.37 66.6561   2
  -5   4   0 1371.14 56.8755   2
  -5  -4   0 1406.17 50.9476   3
   5   4   1-0.17619 5.17015   2
  -5  -4  -1-0.63301 1.92517   3
  -5   4  -1 1.79657 6.25430   2
  -5  -4  -1 2.07793 4.23611   2
   5  -4   1 2.25781 5.22703   2
   5   4   2 57.2627 11.8488   2
  -5   4  -2 53.4577 10.8591   2
  -5  -4  -2 41.0413 7.94039   3
  -5  -4  -2 45.4570 8.35666   2
   5  -4   2 59.3574 15.5240   2
  -5   4  -3 25.6594 12.0236   2
  -5  -4  -3 14.3634 4.39918   2
  -5  -4  -3 9.29224 3.85041   3
   5   4   3 19.4091 7.35205   2
   5  -4   3 24.3579 10.5036   2
  -5   4  -4 18.7131 11.9422   2
  -5  -4  -4 1.65054 3.80323   2
   5   4   4 9.93773 3.64283   2
  -5  -4  -4 2.98281 4.20087   3
   5  -4   4 12.3761 5.04223   2
  -5  -4  -5 80.5608 11.9320   2
  -5   4  -5 98.3857 19.4363   2
   5   4   5 86.9986 18.8474   2
  -5  -4  -5 96.3797 13.1577   3
  -5   4  -6 122.103 21.3679   2
   5   4   6 100.159 23.7620   2
  -5  -4  -6 124.244 17.0084   2
  -5  -4  -7 313.823 26.7967   2
   5   4   7 311.703 36.5487   2
  -5  -4  -8 332.534 27.9010   2
   5   4   8 331.599 38.2870   2
   5   4   9 75.1975 17.6391   2
   5   4  10 590.486 52.8154   2
   5   4  11 28.5070 13.9698   2
  -5   4 -12 325.177 38.9250   3
   5  -4  12 263.092 34.9466   1
   5   4  12 317.841 42.0939   2
   5   4  13 108.982 29.0841   2
   5  -4  13 128.629 21.7170   1
  -5   4 -13 97.0713 24.0129   3
   5   4  14 0.09283 10.4870   2
   5  -4  14 3.23460 6.81565   1
  -5   4 -14 1.98284 9.35146   3
   5  -4  15-6.39148 9.10302   1
  -5   4 -15 6.98036 6.99635   3
  -5  -4 -15-6.95911 10.6789   3
   5   4  15 0.23353 6.84419   2
   5   4  16 25.1557 14.3261   2
  -5   4 -16 5.79028 12.9539   3
  -5  -4 -16 6.63720 9.18798   3
   5  -4  16 21.2293 3.82313   1
   5  -4  17-3.37376 7.77716   1
  -5   4 -17-0.28892 17.8347   3
  -5  -4 -17 2.32232 7.27272   3
   5   4  17-27.3293 19.2033   2
  -5   4 -18 92.4989 28.7868   3
  -5  -4 -18 58.5889 12.8178   3
   5   4  18-7.42899 22.8443   2
   5   5 -20 36.5287 16.7020   3
   5   5 -19 89.5449 25.3005   3
   5   5 -18 84.0409 27.6831   3
   5  -5 -18 54.6780 11.3239   3
   5   5 -17 100.077 24.0380   3
   5  -5 -17 150.970 19.6007   3
   5  -5 -16 66.2599 12.0885   3
   5   5 -16 76.3603 19.3815   3
   5   5 -15 9.11921 9.57860   3
   5  -5 -15 1.71155 3.27607   3
   5  -5 -14 91.1812 12.7087   3
   5   5 -14 77.6714 17.2044   3
  -5   5  14 118.530 16.5697   3
   5  -5 -13 137.957 14.1175   3
   5   5 -13 121.883 19.8794   1
   5   5 -13 138.401 23.1105   3
  -5   5  13 143.785 15.7185   3
   5  -5 -12 28.1441 8.42306   3
   5   5 -12 26.4989 9.26244   3
  -5   5  12 22.0474 5.98689   3
   5   5 -12 13.7992 8.65401   1
   5  -5 -12 10.7770 2.91105   1
  -5   5  11 415.319 25.0446   3
   5  -5 -11 367.757 19.4900   1
   5  -5 -11 421.681 25.5385   3
   5   5 -11 419.691 36.8937   3
   5  -5 -10 14.6649 3.95525   1
   5   5 -10 14.0715 5.47305   3
   5  -5 -10 20.9434 6.21673   3
  -5   5  10 31.1133 8.39840   3
   5   5  -9 1077.49 58.0836   3
  -5   5   9 1086.64 41.4585   3
   5  -5  -9 1166.66 43.5628   3
   5   5  -8 82.0989 14.7078   3
  -5  -5   8 103.140 18.7002   3
  -5   5   8 78.8531 9.70765   3
   5   5  -7 1232.56 58.8497   3
  -5   5   7 1188.70 41.4781   3
  -5  -5   7 1374.81 61.0633   3
   5   5  -6-4.89653 4.53731   3
  -5   5   6 3.70394 2.02865   3
  -5  -5   6 6.12022 2.53787   3
   5   5  -5 623.750 37.9280   3
  -5  -5   5 666.022 38.7087   3
  -5   5   5 582.356 26.9351   3
   5   5  -5 578.180 35.1089   2
  -5   5   5 610.179 22.6578   2
  -5  -5   4 7.80247 3.35565   3
  -5   5   4 10.7750 5.29184   2
   5   5  -4 16.4652 6.44232   3
  -5   5   4 8.47748 3.49169   3
   5   5  -4 5.67295 4.68630   2
  -5   5   3 204.123 17.3647   2
   5   5  -3 215.480 19.9338   2
  -5   5   3 204.528 17.0733   3
   5   5  -3 200.297 19.9532   3
  -5  -5   3 214.031 20.1736   3
   5   5  -2 33.9201 7.16986   3
  -5   5   2 49.0731 8.32756   2
  -5  -5   2 33.5516 8.48858   3
   5   5  -2 31.0071 7.62851   2
  -5  -5   1-1.49460 2.49225   3
  -5   5   1 13.9644 4.96626   2
   5   5  -1-0.14600 3.58793   2
   5   5  -1 2.13309 3.52989   3
  -5  -5   0-1.64299 3.38993   3
   5   5   0 2.12463 2.91092   2
  -5   5   0-7.56872 3.10329   2
  -5  -5   0 2.62253 3.96098   2
   5   5   0-0.85296 2.99119   3
  -5  -5  -1 96.8656 13.7119   2
   5   5   1 87.2023 12.5945   3
  -5   5  -1 97.6733 15.7939   2
   5   5   1 98.1438 15.2935   2
  -5  -5  -1 86.5682 12.0502   3
   5   5   2 22.8407 7.57568   2
  -5   5  -2 21.7457 11.1053   2
  -5  -5  -2 28.1800 6.07119   3
  -5  -5  -2 36.5201 9.80878   2
  -5  -5  -3 1059.40 47.4247   2
   5   5   3 1190.61 55.3423   2
  -5   5  -3 1130.53 59.2635   2
  -5  -5  -3 1001.81 42.6137   3
  -5  -5  -4 61.1382 9.77514   3
  -5  -5  -4 58.5597 11.2770   2
   5   5   4 33.2089 10.0513   2
  -5   5  -4 68.7173 15.4587   2
   5   5   5 760.812 49.0686   2
  -5  -5  -5 707.320 36.4445   3
  -5   5  -5 730.888 51.5325   2
  -5  -5  -5 729.184 39.8107   2
  -5  -5  -6 72.0960 11.4690   2
   5   5   6 37.7794 14.6527   2
  -5  -5  -6 40.3890 8.62036   3
   5   5   7 212.698 36.9871   2
  -5  -5  -7 295.245 23.5463   3
  -5  -5  -7 297.460 26.1678   2
   5   5   8-0.87419 9.26691   2
  -5  -5  -8 2.54427 5.02224   3
   5   5   9 7.65268 7.29463   2
   5   5  10 27.9162 10.2096   2
   5  -5  10 28.4541 8.35489   1
   5   5  11 54.7842 16.2910   2
  -5   5 -11 73.1340 15.9137   3
   5  -5  11 72.2087 17.9713   1
   5  -5  12 16.2525 8.13511   1
  -5   5 -12 13.5210 6.30864   3
   5   5  12 31.3267 14.1242   2
   5   5  13 78.3670 22.7075   2
   5  -5  13 103.526 20.7586   1
  -5   5 -13 75.8979 20.5526   3
   5  -5  14 87.3573 16.9617   1
  -5   5 -14 81.1008 21.3893   3
   5   5  14 64.3105 19.9802   2
   5   5  15 98.2814 24.7539   2
   5  -5  15 181.707 28.3383   1
  -5   5 -15 160.533 31.4150   3
  -5  -5 -15 140.627 21.5033   3
   5  -5  16 91.4270 19.0847   1
   5   5  16 95.8121 34.1393   2
  -5   5 -16 49.2521 18.9706   3
  -5  -5 -16 58.0905 19.1267   3
   5   5  17 57.7201 25.6011   2
  -5   5 -17 89.2178 24.9637   3
   5  -5  17 147.078 28.1096   1
   5   5  18-3.10644 16.6267   2
   5   5  19 34.7461 18.4744   2
   5   6 -20 18.9685 10.8801   3
   5   6 -19-2.93860 5.81031   3
   5   6 -18-2.51593 7.48967   3
   5   6 -17 74.5675 22.3284   3
   5  -6 -16 4.15845 3.66625   3
   5   6 -16 9.11238 8.01297   3
   5   6 -15 149.972 25.6835   3
   5  -6 -15 146.085 15.7702   3
   5  -6 -14 18.9798 5.83361   3
   5   6 -14 20.1708 12.7984   3
   5  -6 -13 284.051 20.6935   3
   5   6 -13 250.783 32.0399   3
  -5   6  13 222.348 19.4754   3
   5   6 -12 19.1806 9.08912   3
   5  -6 -12 20.1322 5.16386   3
  -5   6  12 7.71358 3.74607   3
   5   6 -11 272.597 31.7334   3
   5  -6 -11 350.976 20.6571   1
  -5   6  11 321.941 20.9178   3
  -5   6  10 45.3097 7.60565   3
   5  -6 -10 39.2986 6.73580   1
   5   6 -10 35.2393 9.92861   3
  -5   6   9 127.574 11.6827   3
   5  -6  -9 148.159 15.3968   1
   5   6  -9 128.763 21.0558   3
   5   6  -8 20.4654 9.67692   3
   5  -6  -8 6.36557 3.63165   1
  -5   6   8 20.0444 4.98777   3
   5   6  -7 54.2568 11.1098   3
  -5   6   7 56.8044 7.93015   3
   5  -6  -7 59.5604 9.21462   1
  -5  -6   7 44.4651 9.88798   3
   5   6  -6 68.9143 13.1578   3
  -5   6   6 61.2371 7.85452   3
  -5  -6   6 78.2176 13.0108   3
   5   6  -5 77.4311 13.3229   2
   5   6  -5 72.1647 14.2008   3
  -5   6   5 68.0705 9.00486   2
  -5  -6   5 76.1524 13.3661   3
  -5   6   5 63.1701 7.96966   3
  -5   6   4 131.200 12.7872   3
  -5  -6   4 152.607 18.6242   3
   5   6  -4 153.935 18.8001   2
  -5   6   4 162.697 14.6769   2
   5   6  -4 158.785 18.7606   3
   5   6  -3 449.711 31.0059   3
  -5  -6   3 438.917 30.6402   3
   5   6  -3 399.476 30.3227   2
  -5   6   3 442.781 27.2217   2
   5   6  -2 34.5120 9.46856   3
  -5   6   2 21.6399 6.73787   2
  -5  -6   2 24.6307 5.90435   3
   5   6  -2 24.7902 7.48725   2
  -5  -6   1 698.160 36.6187   3
  -5   6   1 689.837 40.2214   2
   5   6  -1 707.180 38.1031   3
   5   6  -1 651.320 38.6402   2
  -5   6   0 1.22601 4.75860   2
  -5  -6   0 2.83798 5.42184   3
   5   6   0 5.75729 5.15954   2
   5   6   0 5.99160 6.10811   3
  -5  -6  -1 244.767 20.5115   3
  -5  -6  -1 253.308 23.1438   2
   5   6   1 198.724 21.3422   2
  -5   6  -1 251.337 26.0184   2
   5   6   1 239.019 21.5239   3
  -5   6  -2 21.0355 8.76638   2
   5   6   2 17.2568 5.43061   2
  -5  -6  -2 27.6748 10.9020   2
  -5  -6  -2 21.6216 7.37614   3
  -5   6  -3 1.54131 6.47476   2
  -5  -6  -3 9.84511 6.30099   3
  -5  -6  -3 8.91024 3.41539   2
   5   6   3 11.8887 6.00412   2
  -5   6  -4 89.7723 17.3268   2
  -5  -6  -4 76.1671 12.5218   2
   5   6   4 63.2916 13.0049   2
  -5  -6  -4 85.7953 12.1830   3
  -5  -6  -5 25.2749 5.33014   3
  -5  -6  -5 27.5785 10.0696   2
   5   6   5 36.3969 11.3833   2
  -5  -6  -6 246.937 24.1865   2
   5   6   6 214.693 29.1169   2
  -5  -6  -6 228.142 20.1164   3
   5   6   7 545.026 50.0000   2
  -5  -6  -7 478.020 30.0480   3
   5   6   8 262.807 37.8185   2
   5  -6   8 365.532 34.9795   1
  -5  -6  -8 373.008 26.7772   3
   5   6   9 443.246 46.2007   2
   5  -6   9 421.934 39.9188   1
  -5  -6  -9 488.044 31.2709   3
  -5  -6 -10 197.457 21.5530   3
  -5   6 -10 210.957 30.1067   3
   5  -6  10 191.023 25.2037   1
   5   6  10 214.349 33.5677   2
  -5  -6 -11 296.983 26.1901   3
   5  -6  11 319.366 34.9793   1
  -5   6 -11 287.919 36.9826   3
   5   6  11 341.664 42.5209   2
   5   6  12 132.046 28.4054   2
   5  -6  12 106.719 19.9907   1
  -5   6 -12 132.139 26.2799   3
   5  -6  13 93.4698 21.2000   1
   5   6  13 103.035 27.5157   2
  -5   6 -13 81.6223 20.6136   3
  -5   6 -14 77.6439 20.7218   3
  -5  -6 -14 48.8646 13.3088   3
   5  -6  14 83.9141 20.2647   1
   5   6  14 59.4086 15.6871   2
   5  -6  15 21.1565 9.14701   1
  -5   6 -15 19.0526 12.3887   3
  -5  -6 -15 9.14687 9.28979   3
   5   6  15 17.2308 6.38183   2
   5  -6  16-6.98860 10.3527   1
  -5   6 -16 19.8951 22.5674   3
   5   6  16 56.1566 26.3523   2
   5  -6  17-15.0248 8.88153   1
   5   6  17 25.2638 14.9038   2
   5   6  18-22.5022 10.9249   2
   5   7 -19 25.5417 17.0386   3
   5   7 -18 142.718 34.3309   3
   5   7 -17 19.3755 11.1682   3
   5   7 -16 40.0871 17.4675   3
   5   7 -15 34.8793 17.1478   3
   5   7 -14 27.6824 11.7418   3
   5   7 -13 22.8628 15.3940   3
   5   7 -12 213.052 31.0265   3
   5   7 -11 1.95015 8.02761   3
  -5   7  11 4.22516 3.65203   3
   5  -7 -10 842.642 38.8574   1
   5   7 -10 829.161 54.8597   3
  -5   7  10 767.275 29.8386   3
   5   7  -9 15.3758 7.09291   3
  -5   7   9 11.6482 3.57430   3
   5  -7  -9 3.81572 6.24976   1
   5   7  -8 1371.58 67.9477   3
  -5   7   8 1389.88 41.9440   3
   5  -7  -8 1501.40 56.5550   1
  -5   7   7 19.1512 3.28637   3
   5   7  -7 30.2336 11.1042   3
   5  -7  -7 15.1335 7.02049   1
  -5   7   6 863.737 31.8100   3
   5   7  -6 890.229 50.1886   3
  -5  -7   6 1030.97 54.8381   3
   5  -7  -6 822.989 43.2303   1
  -5   7   5 8.85265 3.82614   2
   5   7  -5 5.57940 5.40100   3
  -5   7   5 12.0081 4.59522   3
  -5  -7   5 4.18325 6.55681   3
   5  -7  -5 3.83719 3.66277   1
   5   7  -5 7.78548 7.98386   2
  -5  -7   4 627.880 39.3668   3
  -5   7   4 511.372 26.7221   3
   5   7  -4 532.558 37.6992   2
   5   7  -4 556.926 37.1128   3
   5  -7  -4 493.424 34.7038   1
  -5   7   4 538.331 30.9252   2
  -5   7   3 1.82835 7.99726   2
   5  -7  -3 3.65183 4.21351   1
  -5  -7   3 6.04651 5.68721   3
   5   7  -3 0.20970 7.39614   2
   5   7  -3 11.8175 5.24723   3
  -5   7   2 66.1000 12.4180   2
  -5  -7   2 63.8714 13.7342   3
   5   7  -2 69.1191 12.0980   3
   5  -7  -2 54.3844 12.6347   1
   5   7  -2 44.8174 9.97448   2
   5   7  -1 11.6978 2.19934   3
  -5  -7   1 13.3090 3.89324   3
  -5   7   1 20.2675 8.98713   2
   5  -7  -1 7.56587 5.37858   1
   5   7  -1 23.0000 8.52974   2
  -5  -7   0 229.864 20.8634   3
   5   7   0 227.014 21.8229   3
  -5   7   0 206.001 23.1797   2
   5   7   0 231.322 23.8238   2
   5   7   1 61.7378 12.3041   2
   5   7   1 52.4996 10.7775   3
   5  -7   1 47.9829 13.0735   1
  -5  -7  -1 46.7744 8.22506   3
  -5   7  -1 60.8719 12.6650   2
  -5  -7  -2 373.623 25.7002   3
   5  -7   2 319.096 31.8053   1
   5   7   2 319.727 27.7432   2
  -5   7  -2 397.241 35.6863   2
  -5  -7  -3 69.4966 11.3593   3
  -5   7  -3 47.7763 13.9620   2
   5  -7   3 53.4650 14.4539   1
   5   7   3 72.5607 13.0735   2
  -5  -7  -3 81.9495 13.9782   2
   5   7   4 454.996 36.6246   2
   5  -7   4 469.648 38.7499   1
  -5   7  -4 505.450 43.6164   2
  -5  -7  -4 460.122 27.8252   3
  -5  -7  -5-2.18826 3.98487   3
   5  -7   5 3.37914 3.18988   1
   5   7   5 11.6025 11.7344   2
   5   7   6 574.673 44.8003   2
  -5  -7  -6 493.947 29.0627   3
   5  -7   6 422.916 38.9421   1
  -5  -7  -7 42.6477 8.28872   3
   5  -7   7 70.9667 15.4880   1
   5   7   7 61.3985 17.2236   2
   5  -7   8 96.3942 17.1997   1
   5   7   8 83.2725 19.8173   2
  -5   7  -8 84.5083 18.4482   3
  -5  -7  -8 87.1481 12.7346   3
   5   7   9-5.71939 15.0608   2
   5  -7   9 9.11137 5.19612   1
  -5   7  -9 9.45177 7.61431   3
  -5  -7 -10 2.03296 2.48897   3
   5   7  10-3.80563 11.2939   2
   5  -7  10 13.7722 4.34827   1
  -5   7 -10 15.5002 10.6984   3
   5   7  11-12.8878 13.2685   2
  -5   7 -11-2.20241 11.0866   3
   5  -7  11-2.72925 3.53373   1
   5   7  12 79.5845 23.2694   2
  -5   7 -12 52.8966 20.8000   3
   5  -7  12 92.1907 17.0366   1
   5   7  13 15.0229 6.72802   2
   5  -7  13 7.41561 5.44372   1
  -5   7 -13 6.23518 15.1743   3
   5   7  14 130.997 30.2892   2
   5  -7  14 114.554 21.6826   1
  -5   7 -14 121.711 28.6570   3
   5  -7  15 7.63872 6.68717   1
   5   7  15 24.6399 19.2049   2
  -5   7 -15 9.63713 12.5445   3
   5   7  16 114.087 33.9828   2
   5  -7  16 127.681 24.1538   1
  -5   7 -16 107.553 27.0665   3
   5  -7  17 9.99056 7.27853   1
   5   7  17 49.4922 25.5300   2
   5  -7  18 60.9453 21.4012   1
   5   8 -18-2.05256 18.6697   3
   5   8 -17 37.4107 9.79238   3
   5   8 -16 42.7195 15.3715   3
   5   8 -15 45.8778 14.7979   3
   5   8 -14 168.483 28.6186   3
   5   8 -13 131.733 23.5536   3
   5   8 -12 184.880 29.2469   3
   5   8 -11 102.380 20.9343   3
   5   8 -10 171.256 26.0926   3
   5  -8 -10 210.240 20.4945   1
   5   8  -9 16.9069 7.56204   3
   5  -8  -9 16.6382 7.05468   1
   5   8  -8 71.7967 18.2592   3
   5  -8  -8 48.8996 8.41601   1
   5   8  -7 9.65304 7.12650   3
   5  -8  -7 22.0511 8.32279   1
  -5   8   6 4.22283 2.69733   3
   5  -8  -6 8.43210 7.47833   1
   5   8  -6 2.94688 4.54843   3
  -5   8   6 5.09137 2.52614   2
   5  -8  -5 26.9538 7.12114   1
  -5  -8   5 49.4265 9.31565   3
   5   8  -5 47.8618 12.4049   2
   5   8  -5 30.2701 7.68142   3
  -5   8   5 37.6937 8.31164   2
  -5   8   5 39.1714 7.05641   3
   5  -8  -4 48.9260 10.2543   1
  -5  -8   4 76.8988 13.3454   3
  -5   8   4 60.3497 9.31008   2
   5   8  -4 58.1514 12.4417   2
   5   8  -4 57.1495 12.6587   3
  -5   8   4 59.8486 8.79601   3
   5   8  -3 224.359 22.8166   3
  -5  -8   3 265.114 24.4562   3
   5   8  -3 225.111 25.7028   2
   5  -8  -3 258.606 26.7200   1
  -5   8   3 223.705 20.3418   2
   5   8  -2 180.360 21.2357   2
  -5  -8   2 158.939 18.9944   3
   5  -8  -2 139.451 19.5023   1
  -5   8   2 109.868 18.5667   2
   5   8  -2 152.211 18.0215   3
   5   8  -1 148.005 20.6761   2
  -5  -8   1 175.176 19.1451   3
   5   8  -1 155.603 18.9810   3
   5  -8  -1 138.449 20.0289   1
  -5   8   1 147.600 17.8759   2
  -5  -8   0 176.858 19.8076   3
   5   8   0 158.591 19.8327   2
   5  -8   0 159.496 22.1803   1
  -5   8   0 162.183 23.7490   2
   5   8   0 170.262 18.8253   3
   5  -8   1 75.4252 13.9597   1
  -5  -8  -1 80.5591 11.5013   3
   5   8   1 67.4246 14.8910   2
  -5   8  -1 84.9115 17.5171   2
   5   8   1 90.5245 14.5240   3
   5   8   2 13.2991 6.15702   2
  -5  -8  -2 11.1190 2.60001   3
   5  -8   2 12.7893 3.65500   1
  -5   8  -2 5.09726 12.0775   2
   5  -8   3-2.83426 7.42625   1
  -5  -8  -3 2.22706 5.33063   3
   5   8   3 1.06952 7.03082   2
  -5  -8  -4 65.5572 9.08025   3
   5   8   4 79.5803 15.9856   2
   5  -8   4 83.7262 18.6047   1
  -5  -8  -5 71.5589 10.5780   3
   5  -8   5 83.6823 18.8086   1
   5   8   5 85.6689 16.9661   2
   5   8   6 156.896 24.9761   2
   5  -8   6 148.491 22.8042   1
  -5   8  -6 169.371 23.8808   3
  -5  -8  -6 171.069 16.8527   3
   5   8   7 306.615 32.8214   2
   5  -8   7 286.291 35.0922   1
  -5   8  -7 304.306 36.0665   3
  -5  -8  -7 285.685 21.4012   3
  -5  -8  -8 403.647 26.5891   3
   5   8   8 349.646 39.9526   2
   5  -8   8 444.310 40.9968   1
  -5   8  -8 460.881 45.5938   3
   5   8   9 327.505 48.9617   2
   5  -8   9 293.736 33.9591   1
  -5   8  -9 283.370 35.5888   3
   5   8  10 302.769 41.4850   2
   5  -8  10 296.121 35.0911   1
  -5   8 -10 338.371 43.1197   3
   5   8  11 148.588 29.2116   2
  -5   8 -11 140.200 25.3129   3
   5  -8  11 89.7670 17.1753   1
   5   8  12 92.9852 23.4362   2
   5  -8  12 117.732 24.7520   1
  -5   8 -12 96.4604 25.2836   3
   5   8  13 114.536 26.7407   2
   5  -8  13 137.908 26.4030   1
  -5   8 -13 155.276 33.0822   3
   5   8  14 13.9453 17.6203   2
   5  -8  14 45.3793 13.2568   1
  -5   8 -14 47.4559 14.3676   3
   5   8  15-12.1798 14.8529   2
   5  -8  15-5.85831 14.8524   1
  -5   8 -15-0.39993 10.9531   3
   5   8  16 17.2591 9.17222   2
   5  -8  16 18.9638 14.3565   1
   5  -8  17-2.68825 13.0856   1
   5   9 -17 129.790 27.1834   3
   5   9 -16 13.8345 12.3137   3
   5   9 -15 36.9328 12.8831   3
   5   9 -14 1.44496 7.41574   3
   5   9 -13 36.7862 15.6340   3
   5   9 -12 21.9761 12.0878   3
   5   9 -11 271.147 33.2382   3
   5   9 -10 6.88863 8.86144   3
   5  -9  -9 764.973 43.4097   1
   5   9  -9 612.365 48.9638   3
   5   9  -8-0.51293 6.60404   3
   5  -9  -8 0.25097 4.23382   1
  -5   9   8 1.04975 1.45383   3
   5   9  -7 735.254 49.7095   3
   5  -9  -7 817.241 47.1304   1
  -5   9   7 658.754 21.2666   2
  -5   9   6 1.29788 4.61087   2
   5  -9  -6 1.36295 6.86977   1
   5   9  -6-3.83549 8.53118   3
   5   9  -5 267.359 27.1916   3
   5  -9  -5 286.343 28.9320   1
   5   9  -5 268.369 28.9233   2
  -5   9   5 245.208 23.0239   2
  -5   9   5 292.538 18.3557   3
   5   9  -4 7.71430 6.57165   3
  -5  -9   4 7.05921 11.5348   3
   5  -9  -4-3.09380 6.01501   1
  -5   9   4-11.7065 9.59384   2
  -5   9   4-0.63291 2.34196   3
   5   9  -4 3.76615 10.6176   2
   5   9  -3 152.712 19.9371   3
   5   9  -3 192.341 22.8183   2
  -5  -9   3 195.765 22.4124   3
   5  -9  -3 169.295 22.1951   1
  -5   9   3 176.438 19.8401   2
  -5  -9   2-2.34259 4.29235   3
   5  -9  -2 0.80739 3.90964   1
   5   9  -2 8.60935 9.13614   2
   5   9  -2 0.62308 5.60436   3
  -5   9   2 3.42461 7.18119   2
   5  -9  -1 4.73312 6.82135   1
   5   9  -1 10.7018 7.07663   3
  -5   9   1 13.2919 9.65079   2
  -5  -9   1 7.46508 5.07451   3
   5   9  -1 5.65370 4.39221   2
  -5   9   0 11.8457 4.81419   2
   5  -9   0 5.22921 11.1873   1
  -5  -9   0 12.3989 4.90624   3
   5   9   0 1.13030 4.40984   2
   5   9   0 5.51035 6.47329   3
  -5  -9  -1 229.055 21.8532   3
   5  -9   1 203.206 26.3968   1
   5   9   1 230.724 22.4998   3
  -5   9  -1 230.759 28.1898   2
   5   9   1 227.170 24.6863   2
   5   9   2 36.1088 13.1266   2
  -5  -9  -2 50.4297 10.2470   3
   5  -9   2 28.5001 8.33810   1
  -5  -9  -3 373.659 26.1697   3
   5  -9   3 428.882 38.8382   1
   5   9   3 381.588 33.3918   2
   5   9   4 7.65740 4.13035   2
  -5  -9  -4 2.90307 4.93251   3
  -5   9  -4 8.89530 5.70976   3
   5  -9   4-0.37217 4.25295   1
  -5  -9  -5 285.394 21.1326   3
   5  -9   5 233.586 30.3338   1
   5   9   5 284.238 30.7499   2
  -5   9  -5 250.834 32.1030   3
  -5  -9  -6 4.57797 5.23294   3
  -5   9  -6-5.42306 9.79314   3
   5   9   6 13.6052 4.96872   2
   5  -9   6 1.76835 7.72158   1
   5   9   7 175.977 29.6811   2
   5  -9   7 180.396 26.7308   1
  -5   9  -7 177.292 26.7846   3
  -5  -9  -7 182.581 17.4897   3
   5   9   8 4.56208 6.91911   2
  -5   9  -8 7.58822 8.24286   3
   5  -9   8 2.56363 4.03790   1
   5   9   9 11.2770 11.0071   2
   5  -9   9 2.24258 8.80430   1
  -5   9  -9 9.10887 9.62190   3
   5   9  10-17.1469 5.52711   2
   5  -9  10-2.59354 3.53346   1
  -5   9 -10-6.28988 4.10751   3
   5   9  11 88.0570 23.8740   2
   5  -9  11 69.2069 18.2118   1
  -5   9 -11 45.2621 17.0145   3
   5   9  12 30.6050 19.7575   2
   5  -9  12 7.63343 11.5529   1
  -5   9 -12-4.17351 10.9871   3
   5  -9  13 145.231 27.6371   1
   5   9  13 120.753 25.4899   2
  -5   9 -13 99.9790 26.3136   3
   5  -9  14 11.6462 8.54345   1
  -5   9 -14-7.62029 17.7725   3
   5  -9  15 76.7192 20.5788   1
   5   9  15 47.9325 31.0913   2
   5  -9  16-8.97893 12.0820   1
   5  10 -16 71.1288 23.4078   3
   5  10 -15 73.0880 21.1879   3
   5  10 -14 116.172 20.3665   3
   5  10 -13 159.224 29.4128   3
   5  10 -12 124.385 24.1733   3
   5  10 -11 93.2309 19.5566   3
   5  10 -10 27.5048 10.8841   3
   5  10  -9 39.8781 13.5479   3
   5  10  -8 3.34141 5.24504   3
   5  10  -7-0.65497 6.78424   3
  -5  10   7 0.70191 1.90771   2
  -5  10   7-2.57379 2.03384   3
   5 -10  -7-6.02287 8.16015   1
   5 -10  -6 107.903 19.4757   1
   5  10  -6 99.0794 20.1828   2
   5  10  -6 89.0127 18.2313   3
  -5  10   6 91.5360 9.84104   2
  -5  10   6 77.0923 8.71694   3
  -5  10   6 40.3733 10.3272   2
   5 -10  -5 31.7031 12.0084   1
   5  10  -5 23.8283 10.8515   3
   5  10  -5 22.7507 10.4980   2
  -5  10   5 23.7587 5.82137   3
  -5  10   5-1.37253 5.75247   2
   5 -10  -4 298.401 30.5838   1
   5  10  -4 280.634 32.2771   2
   5  10  -4 291.304 29.3104   3
  -5  10   4 275.220 21.5678   3
  -5  10   4 267.587 26.9114   2
  -5  10   4 214.904 19.2258   3
   5 -10  -3 107.428 19.1788   1
  -5  10   3 104.698 15.3542   3
   5  10  -3 100.427 17.3843   3
   5  10  -3 141.306 20.9203   2
  -5  10   3 92.5970 17.1801   2
   5 -10  -2 588.988 44.8747   1
  -5 -10   2 643.449 41.5373   3
   5  10  -2 623.857 40.9865   3
  -5  10   2 650.794 38.7384   3
   5  10  -2 653.990 46.5870   2
  -5  10   2 651.941 45.8692   2
   5  10  -1 44.7317 9.17749   3
  -5 -10   1 34.7455 8.60498   3
   5 -10  -1 43.7451 12.5274   1
   5  10  -1 62.8910 15.0250   2
  -5  10   1 56.2634 12.7115   3
  -5  10   1 39.3688 13.9719   2
  -5 -10   0 536.116 34.1141   3
   5 -10   0 431.128 40.2559   1
   5  10   0 385.205 35.0809   2
   5  10   0 513.993 35.6241   3
  -5  10   0 517.435 37.9033   3
  -5  10   0 584.547 46.9103   2
   5  10   1 13.9255 8.66971   3
   5  10   1 23.6519 11.5435   2
  -5 -10  -1 10.6121 5.97237   3
   5 -10   1 15.9698 10.7963   1
  -5  10  -1 8.97348 4.11780   3
   5  10   2 99.5742 17.7084   2
  -5 -10  -2 73.0308 13.5144   3
   5 -10   2 79.2080 17.7434   1
  -5  10  -2 92.7876 15.8600   3
   5  10   3 41.2206 12.7160   2
  -5 -10  -3 32.2300 6.95992   3
   5 -10   3 27.2505 7.04001   1
  -5  10  -3 29.0862 12.9917   3
   5  10   4 4.99335 7.74225   2
  -5 -10  -4 2.85056 4.25552   3
   5 -10   4 4.94380 6.77754   1
  -5  10  -4 4.59038 7.59771   3
  -5 -10  -5 141.399 15.6374   3
   5 -10   5 169.007 26.4675   1
   5  10   5 147.401 24.5004   2
  -5  10  -5 198.371 28.4423   3
   5 -10   6 8.25842 8.03460   1
  -5  10  -6 5.32283 8.31989   3
   5  10   6 9.45714 4.54942   2
   5  10   7 266.007 35.3969   2
   5 -10   7 293.166 35.3796   1
  -5  10  -7 332.059 39.8350   3
   5 -10   8 112.220 21.3241   1
   5  10   8 66.9967 15.3967   2
  -5  10  -8 93.1500 22.8215   3
   5  10   9 296.849 41.8258   2
   5 -10   9 285.586 35.2851   1
  -5  10  -9 246.204 36.3203   3
   5  10  10 100.980 26.5521   2
  -5  10 -10 146.943 29.0660   3
   5 -10  10 179.713 30.2399   1
   5 -10  11 263.753 34.0954   1
   5  10  11 245.513 37.1679   2
  -5  10 -11 238.695 38.1388   3
   5  10  12 82.0697 26.4146   2
   5 -10  12 103.937 26.2111   1
  -5  10 -12 62.8852 22.2577   3
   5  10  13 142.443 31.4038   2
  -5  10 -13 85.4472 23.8156   3
   5 -10  13 140.435 29.8881   1
   5  10  14-7.53651 10.1806   2
   5 -10  14 8.36129 12.2309   1
   5 -10  15 13.2702 11.8390   1
   5  11 -15 12.3201 15.9788   3
   5  11 -14 20.3567 13.5571   3
   5  11 -13 5.53732 13.2911   3
   5  11 -12 35.4339 13.5408   3
   5  11 -11 14.7901 7.86094   3
   5  11 -10 331.184 38.1997   3
   5  11  -9-10.2987 7.74612   3
   5  11  -8 352.795 37.4831   3
   5  11  -7 1.28634 6.77041   3
  -5  11   6 189.131 14.7745   2
   5  11  -6 145.887 25.6547   2
   5 -11  -6 177.754 25.2335   1
   5  11  -6 182.469 24.7564   3
   5  11  -5 5.84464 12.1637   2
  -5  11   5 0.47749 2.76912   3
   5 -11  -5-1.57190 8.61392   1
   5  11  -5 6.92743 3.86745   3
   5  11  -4 217.622 27.2175   3
   5  11  -4 225.566 28.6636   2
  -5  11   4 200.716 17.7242   3
  -5  11   4 69.7410 16.5444   2
   5 -11  -4 199.919 27.7353   1
   5 -11  -3 13.5069 7.67774   1
   5  11  -3 13.0958 3.54225   3
  -5  11   3 15.2403 2.91952   3
   5  11  -3 17.9014 9.17435   2
  -5  11   3 28.5144 8.09059   2
   5 -11  -2 10.7329 10.0264   1
  -5  11   2 18.2718 9.28207   3
   5  11  -2 9.69997 4.04344   2
   5  11  -2 11.8571 8.86651   3
  -5  11   2 12.4841 3.79047   2
   5  11  -1 31.5190 7.73640   3
   5 -11  -1 34.4626 10.9678   1
  -5 -11   1 19.9786 9.64432   3
  -5  11   1 9.00816 13.5645   2
   5  11  -1 39.6359 11.0848   2
  -5  11   1 36.4215 11.7826   3
   5 -11   0 132.978 22.7424   1
  -5 -11   0 109.869 16.2385   3
   5  11   0 77.2383 15.9909   2
  -5  11   0 119.420 19.1347   3
   5  11   0 144.923 19.4621   3
   5  11   1 42.9054 12.3535   2
  -5 -11  -1 40.2449 7.88770   3
  -5  11  -1 60.4308 13.5762   3
   5 -11   1 45.7321 12.3519   1
   5  11   1 51.3010 10.8709   3
   5 -11   2 432.754 41.7313   1
  -5 -11  -2 388.621 28.3575   3
  -5  11  -2 397.303 37.8930   3
   5  11   2 399.392 37.6201   2
   5  11   3 21.4031 12.0667   2
   5 -11   3 21.1633 6.76653   1
  -5  11  -3 23.4857 9.63102   3
   5 -11   4 367.695 39.6337   1
  -5  11  -4 375.576 36.9535   3
   5  11   4 420.539 37.3762   2
   5 -11   5 54.0906 16.4530   1
  -5  11  -5 42.6433 16.2119   3
   5  11   5 13.5806 7.50951   2
   5 -11   6 158.284 27.8527   1
   5  11   6 239.338 31.0368   2
  -5  11  -6 180.944 28.1055   3
  -5  11  -7 21.7895 10.4681   3
   5 -11   7 31.4588 11.3712   1
   5  11   7 30.2807 16.7209   2
   5 -11   8 103.900 21.3519   1
  -5  11  -8 90.7770 23.4208   3
   5  11   8 97.3744 21.8576   2
   5 -11   9-0.64746 9.38742   1
   5  11   9 13.5906 11.5133   2
  -5  11  -9 30.0816 13.6329   3
   5 -11  10-0.22711 7.04605   1
   5  11  10 19.8628 19.8736   2
  -5  11 -10-4.58833 16.8305   3
   5 -11  11 9.41713 8.09927   1
  -5  11 -11-2.40714 13.1979   3
   5  11  11-9.10305 7.86234   2
   5  11  12 75.8226 24.7083   2
  -5  11 -12 49.3761 19.3484   3
   5 -11  12 49.3116 11.5778   1
   5  11  13 51.1900 24.0665   2
   5 -11  13-7.40304 4.37626   1
   5  12 -14 54.5665 15.3888   3
   5  12 -13 210.630 34.3663   3
   5  12 -12 75.3652 21.1239   3
   5  12 -11 129.485 24.0142   3
   5  12 -10 35.9809 9.13100   3
   5  12  -9 68.7704 18.4371   3
   5  12  -8 23.3827 9.98754   3
   5  12  -7 4.69138 3.74637   3
   5  12  -7 1.14197 6.18241   2
   5  12  -6 3.40883 8.34704   3
   5  12  -6-0.13139 5.84962   2
   5  12  -5 141.247 24.0086   3
   5  12  -5 136.301 24.7869   2
   5 -12  -4 15.1701 5.34798   1
   5  12  -4 25.7502 8.00779   3
   5  12  -4 26.7693 11.1276   2
   5  12  -3 319.179 31.7735   3
   5 -12  -3 336.024 37.6052   1
   5  12  -3 391.176 38.2120   2
  -5  12   3 357.188 27.0577   3
   5  12  -2 18.4974 10.1648   3
  -5  12   2 20.7140 7.05536   3
   5  12  -2 16.8744 11.0511   2
   5 -12  -2 19.7413 12.1551   1
   5 -12  -1 288.519 35.4173   1
  -5  12   1 278.884 28.0020   3
   5  12  -1 243.664 30.7033   2
   5  12  -1 287.935 29.1447   3
   5  12   0 4.77845 5.32401   2
  -5  12   0 5.82525 4.63508   3
   5 -12   0-7.91337 11.1652   1
   5  12   0 7.38844 6.12107   3
   5 -12   1 139.004 26.6139   1
   5  12   1 149.016 23.5405   2
  -5  12  -1 140.933 21.2218   3
   5  12   1 147.991 20.1650   3
   5  12   2 7.65725 7.31707   2
  -5  12  -2 6.09118 10.0933   3
   5 -12   2-2.89212 9.04716   1
   5  12   3 29.6292 10.6076   2
  -5  12  -3 17.6954 10.6246   3
   5 -12   3 25.3433 11.5501   1
   5 -12   4 61.5688 17.3034   1
  -5  12  -4 61.3628 17.2527   3
   5  12   4 54.6347 16.3641   2
   5 -12   5-2.62544 4.29806   1
   5  12   5 0.60016 10.6969   2
  -5  12  -5-2.98530 8.35722   3
   5 -12   6 117.229 23.8843   1
  -5  12  -6 134.944 23.9318   3
   5  12   6 148.939 26.3753   2
  -5  12  -7 44.0355 14.0961   3
   5  12   7 40.8655 14.3452   2
   5 -12   7 38.8598 12.2779   1
   5 -12   8 140.944 26.8031   1
  -5  12  -8 111.768 26.5564   3
   5  12   8 83.2634 20.6562   2
   5  12   9 62.1061 22.7280   2
  -5  12  -9 52.0676 12.4872   3
   5 -12   9 82.8574 18.2174   1
   5  12  10 85.2306 23.8049   2
  -5  12 -10 86.9563 27.6903   3
   5 -12  10 78.2443 21.1290   1
   5  12  11 45.8706 16.5763   2
  -5  12 -11 26.3439 13.5684   3
   5  13 -13 3.17479 14.5508   3
   5  13 -12-3.49638 10.1950   3
   5  13 -11 72.5858 20.4430   3
   5  13 -10 27.9704 16.9197   3
   5  13  -9 213.301 32.5192   3
   5  13  -8-2.71418 4.51001   2
   5  13  -8-8.89183 13.2952   3
   5  13  -7 176.632 26.6137   3
   5  13  -7 266.300 35.5954   2
   5  13  -6 3.44757 7.21764   3
   5  13  -6-3.37336 7.77817   2
   5  13  -5 151.565 24.5099   3
   5  13  -5 156.993 28.7056   2
   5  13  -4 3.58191 4.05683   2
   5  13  -4-1.21352 6.77803   3
   5  13  -3 17.0283 3.03475   3
   5  13  -3 29.9888 9.26197   2
   5  13  -2 10.7489 7.16886   3
   5  13  -2 0.68859 6.99176   2
  -5  13   1 15.0828 8.02852   3
   5  13  -1 42.7021 14.7679   3
   5  13  -1 18.5764 11.0683   2
   5  13   0 54.6208 11.8691   3
   5  13   0 28.7534 3.56283   2
  -5  13   0 55.8034 15.3872   3
   5 -13   0 48.9278 18.1702   1
   5  13   1 137.526 24.8415   2
   5  13   1 121.781 18.9217   3
  -5  13  -1 105.252 20.1002   3
   5 -13   1 130.272 27.1193   1
   5  13   2 51.0679 15.2939   2
  -5  13  -2 48.0293 14.1105   3
   5 -13   2 46.1794 17.7706   1
   5 -13   3 258.431 37.1848   1
  -5  13  -3 243.557 32.0303   3
   5  13   3 246.048 32.1540   2
  -5  13  -4 39.5602 14.6704   3
   5 -13   4 35.9081 12.0607   1
   5  13   4 35.4857 12.7690   2
   5  13   5 211.880 31.2831   2
  -5  13  -5 171.357 28.0382   3
   5 -13   5 165.224 31.4267   1
  -5  13  -6 28.1703 12.9248   3
   5 -13   6 27.0311 16.1470   1
   5  13   6 22.7535 10.1629   2
  -5  13  -7 70.9512 16.2549   3
   5 -13   7 74.2284 24.5865   1
   5  13   7 65.0627 22.7179   2
   5 -13   8 1.18920 9.86394   1
  -5  13  -8 1.76390 12.1739   3
   5  13   8-5.41065 6.49359   2
   5  13   9-9.11969 9.47708   2
  -5  13  -9 14.3408 7.98604   3
   5  13  10-17.0982 17.3334   2
  -5  13 -10 4.18240 12.2374   3
   5  14 -11 25.6842 16.1692   3
   5  14 -10 45.2652 18.4357   3
   5  14  -9 2.89379 11.5833   3
   5  14  -8-1.00626 4.01397   2
   5  14  -8 42.4243 16.4958   3
   5  14  -7 6.98687 7.89164   3
   5  14  -7 13.0435 17.1445   2
   5  14  -6 72.9315 20.5040   3
   5  14  -6 88.9928 23.0292   2
   5  14  -5 16.3666 10.8457   3
   5  14  -5 13.2521 13.7702   2
   5  14  -4 296.053 33.1588   3
   5  14  -4 220.564 30.9054   2
   5  14  -3 37.6147 13.3154   3
   5  14  -3 10.9849 11.3833   2
   5  14  -2 295.570 41.0547   2
   5  14  -2 368.422 34.1381   3
   5  14  -1 3.55485 12.4551   2
   5  14   0 269.278 35.1874   2
   5  14   1 14.5639 3.59235   2
  -5  14  -2 87.4139 21.2464   3
   5  14   2 115.325 24.7494   2
   5  14   3 12.1856 15.2793   2
  -5  14  -3-1.92861 5.37454   3
  -5  14  -4 6.21884 7.60951   3
   5  14   4 12.7973 5.05302   2
   5  14   5 10.3781 9.45518   2
  -5  14  -5-2.81119 16.3808   3
  -5  14  -6-26.3881 11.6364   3
   5  14   6 9.69951 9.90004   2
  -5  14  -7 45.2373 15.7935   3
   5  14   7 46.5985 20.3716   2
  -5  14  -8 51.2753 18.9254   3
   5  14   8 49.3585 24.7060   2
  -5  14  -9 62.6558 25.5782   3
   5  15 -10 77.2719 22.6843   3
   5  15  -9 23.2449 6.27102   3
   5  15  -8 108.805 23.0647   3
   5  15  -7 2.00092 12.6501   3
   5  15  -6 70.2452 18.4279   3
   5  15  -5-7.82560 5.42376   3
   5  15  -5-3.53541 10.4342   2
   5  15  -4 24.5036 13.9908   2
   5  15  -3 2.91862 6.10973   2
   5  15  -2 29.6446 16.8985   2
   5  15  -1 6.89062 6.92816   2
   5  15   0 56.2520 18.1743   2
   5  15   1 89.3917 23.3732   2
   5  15   2 160.427 27.0304   2
   5  15   3 92.3310 23.0682   2
   5  15   4 186.656 31.6493   2
   5  15   5 8.83742 10.9939   2
  -5  15  -6 79.4094 25.6068   3
   5  15   6 138.901 29.4513   2
  -5  15  -7-5.20149 13.0722   3
   5  15   7 6.13303 11.2193   2
  -5  15  -8-51.6515 16.9919   3
   5  16   1 162.893 28.2630   2
   5  16   2 25.7473 8.18724   2
   5  16   3 32.2883 16.8555   2
   5  16   4-4.14773 14.5880   2
   6   0 -23-6.46065 9.56273   3
   6   0 -22 94.7629 17.6403   3
   6   0 -21-10.7828 15.0124   3
   6   0 -20 49.6544 15.6395   3
   6   0 -19 2.36995 4.98477   3
   6   0 -18 72.4029 19.6704   3
   6   0 -17-3.51559 7.14246   3
   6   0 -16 7.88963 8.20648   3
   6   0 -16-0.32562 5.28638   2
   6   0 -15 13.6819 8.66093   3
   6   0 -14 92.1221 17.1677   3
   6   0 -13-3.29294 3.13610   3
   6   0 -12 1122.75 57.4646   3
  -6   0  12 1230.15 60.4011   3
  -6   0  11-3.16882 4.74433   3
   6   0 -11-1.81917 4.29439   2
   6   0 -11-1.52735 3.05743   3
  -6   0  10 1311.13 58.2055   3
   6   0 -10 1271.80 44.4463   2
   6   0 -10 1184.39 56.2871   3
   6   0  -9 0.17463 5.38168   3
  -6   0   9-1.08130 3.48777   3
   6   0  -9-2.92788 4.29597   2
   6   0  -8 1013.75 37.8512   2
  -6   0   8 1000.73 46.7478   3
   6   0  -8 896.184 45.8984   3
   6   0  -7-4.00856 5.23542   3
  -6   0   7 1.99301 1.99808   3
   6   0  -7 0.80098 2.21398   2
  -6   0   6 393.949 27.1238   3
   6   0  -6 375.896 27.4967   3
   6   0  -6 462.581 24.1283   2
  -6   0   5 2.11876 2.87147   2
   6   0  -5 0.88636 2.06499   2
  -6   0   5 2.79955 4.52628   3
   6   0  -5 1.78309 2.85593   3
  -6   0   4 122.820 14.3751   3
  -6   0   4 132.983 12.2541   2
   6   0  -4 114.638 12.9927   2
   6   0  -4 134.165 15.5724   3
  -6   0   3 2.01226 1.77419   2
   6   0  -3 2.91650 4.95345   2
   6   0  -3 2.52280 3.72894   3
  -6   0   3-1.30376 3.34673   3
  -6   0   2 172.498 16.8475   3
   6   0  -2 156.165 17.1095   2
  -6   0   2 166.760 15.0763   2
  -6   0   1-4.49266 3.29409   3
  -6   0   1 1.72132 4.40163   2
   6   0  -1-0.21104 7.67497   2
   6   0   0 778.422 46.6671   2
  -6   0   0 717.628 34.9619   2
  -6   0   0 714.574 37.2073   3
   6   0   1-2.28621 6.23360   2
  -6   0  -1 0.34271 2.40586   2
  -6   0  -2 898.383 44.1930   2
   6   0   2 835.666 52.8223   2
   6   0   3 5.90138 9.37594   2
  -6   0  -3 4.11025 2.77811   2
  -6   0  -4 1526.55 66.1516   2
   6   0   4 1279.38 69.4843   2
   6   0   5-12.5323 11.1954   2
  -6   0  -5 8.63105 8.76584   2
  -6   0  -6 342.614 34.5052   2
   6   0   6 291.715 35.7553   2
   6   0   7-2.33876 12.0387   2
   6   0   8-4.40594 8.45507   2
   6   0   9 13.9217 11.1704   2
   6   0  10 97.7653 22.7671   2
   6   0  11 5.40916 8.56849   2
   6   0  12 359.868 48.8770   2
   6   0  13-0.24611 7.93181   2
   6   0  14 187.362 43.6136   2
  -6   0 -15 3.04121 7.55778   3
   6   0  15-5.02098 12.7372   2
  -6   0 -16 74.6914 15.7152   3
  -6   0 -17 47.6536 26.7890   3
  -6   0 -18 22.9815 11.2832   3
  -6   0 -19 5.39527 16.1690   3
   6  -1 -23 5.91133 14.6538   3
   6   1 -23 65.5315 25.9011   3
   6  -1 -22 10.2877 7.72447   3
   6   1 -22 29.0275 14.5334   3
   6  -1 -21 15.2033 12.6844   3
   6   1 -21 13.4460 10.8087   3
   6  -1 -20 0.04463 6.46951   3
   6   1 -20-5.21703 12.2456   3
   6   1 -19 8.01308 8.89875   3
   6  -1 -19 10.9408 7.86137   3
   6   1 -18 23.4717 5.58824   3
   6  -1 -18 48.1754 15.3368   3
   6   1 -17 76.2258 19.6370   3
   6  -1 -17 67.0061 15.5775   3
   6   1 -16 74.6308 11.4519   1
   6   1 -16 110.355 20.2939   3
   6  -1 -16 110.427 16.9247   3
   6  -1 -16 154.152 28.0147   2
   6  -1 -15 274.592 30.1670   3
   6   1 -15 252.575 29.9054   3
   6   1 -15 191.741 19.7984   1
   6  -1 -15 86.0032 18.9859   2
   6  -1 -14 142.433 19.6433   3
   6   1 -14 132.199 20.9377   3
   6   1 -13 79.2487 18.2654   3
   6  -1 -13 63.9167 14.1921   3
  -6   1  13 66.6329 12.8445   3
   6  -1 -12 76.5562 13.9807   3
   6   1 -12 65.2829 13.4759   3
   6  -1 -12 82.4314 10.0358   2
  -6   1  12 92.9604 15.3260   3
   6  -1 -11 36.1362 9.91164   3
   6   1 -11 23.8967 7.48076   3
  -6   1  11 37.0912 9.94567   3
  -6  -1  11 45.5998 11.9547   3
   6  -1 -11 33.9187 6.45039   2
   6   1 -10 75.4600 11.1353   2
   6  -1 -10 90.4298 9.86391   2
   6  -1 -10 85.4993 13.7695   3
   6   1 -10 84.5894 14.6664   3
  -6   1  10 88.3462 13.8895   3
  -6  -1  10 99.6102 16.1573   3
   6  -1  -9 5.28859 2.44730   3
   6   1  -9 0.62145 4.13172   3
  -6   1   9-0.12353 4.17164   3
  -6  -1   9 0.74224 3.00242   3
   6  -1  -9 3.25617 2.56441   2
   6   1  -9 9.87597 5.56222   2
   6   1  -8 5.38832 4.11046   3
   6  -1  -8 6.47262 5.28306   3
   6  -1  -8 6.26708 3.92545   2
  -6  -1   8 7.08965 3.87240   3
   6   1  -8 4.80014 4.15092   2
  -6   1   8 0.35070 4.69798   3
   6  -1  -7 59.9917 11.0666   3
   6   1  -7 67.6322 12.0712   3
  -6  -1   7 59.9201 8.99232   3
   6   1  -7 65.5324 9.74147   2
   6  -1  -7 54.4074 8.09712   2
  -6   1   7 51.7143 9.77046   3
  -6   1   6 156.799 16.3622   3
  -6  -1   6 133.601 16.4573   3
   6  -1  -6 147.290 16.8409   3
   6  -1  -6 148.626 13.2138   2
   6   1  -6 136.996 16.4490   3
   6   1  -6 131.650 13.8138   2
  -6   1   5 985.760 42.4044   3
  -6  -1   5 981.719 44.6919   3
  -6   1   5 1048.63 35.4316   2
   6  -1  -5 1046.97 46.8658   3
   6  -1  -5 1115.72 40.2247   2
   6   1  -5 964.733 39.4921   2
   6   1  -5 1038.36 47.9284   3
   6  -1  -4 180.233 17.9007   2
   6  -1  -4 218.880 20.3207   3
  -6  -1   4 203.996 16.4367   2
  -6   1   4 196.291 14.4319   2
   6   1  -4 203.066 20.1436   3
  -6  -1   4 200.295 18.5015   3
   6   1  -4 221.984 18.2101   2
  -6   1   4 188.672 17.4744   3
  -6  -1   3 554.098 31.4783   3
   6   1  -3 564.098 34.3265   3
   6  -1  -3 536.901 33.3751   2
  -6  -1   3 586.589 28.3928   2
  -6   1   3 553.873 30.5581   3
   6   1  -3 602.126 31.1212   2
  -6   1   3 695.827 28.9864   2
  -6   1   2 6.31899 2.74970   3
  -6   1   2 2.17856 2.18191   2
   6  -1  -2 6.35883 7.20825   2
  -6  -1   2 1.96663 4.77347   2
   6   1  -2 0.35456 5.30654   2
   6   1  -2 6.27338 4.16684   3
  -6  -1   2 3.05713 4.78416   3
   6   1  -1 217.790 21.0260   2
   6  -1  -1 243.751 26.4733   2
  -6   1   1 325.858 22.1477   2
  -6  -1   1 185.471 16.6105   2
  -6  -1   1 203.352 18.6456   3
  -6   1   1 227.415 19.8566   3
   6  -1   0 89.2340 15.2303   2
   6   1   0 99.5925 14.6104   2
  -6  -1   0 99.9445 12.3795   2
  -6   1   0 96.4699 12.2812   2
  -6  -1   0 104.496 13.2516   3
   6   1   1 195.192 23.0172   2
  -6   1  -1 175.211 18.3272   2
  -6  -1  -1 213.100 18.8888   2
   6  -1   1 205.366 24.6726   2
  -6  -1  -1 227.460 20.7267   3
  -6   1  -2 180.311 20.2631   2
  -6  -1  -2 201.529 19.1205   2
   6  -1   2 185.938 25.3233   2
   6   1   2 217.945 30.8693   2
   6  -1   3 30.7452 11.2305   2
   6   1   3 22.5740 10.7496   2
  -6   1  -3 23.5669 8.97909   2
  -6  -1  -3 42.5358 11.0360   2
  -6   1  -4 262.207 27.9875   2
  -6  -1  -4 331.718 27.1234   2
   6  -1   4 334.589 35.2987   2
   6   1   4 284.718 33.6434   2
  -6   1  -5 531.016 43.4559   2
  -6  -1  -5 667.037 41.7021   2
   6   1   5 580.884 46.9899   2
   6  -1   5 640.999 49.6400   2
  -6   1  -6 752.001 52.8518   2
  -6  -1  -6 749.420 47.0547   2
   6  -1   6 666.291 52.8175   2
   6   1   6 664.999 51.8690   2
   6  -1   7 511.312 47.1142   2
   6   1   7 505.222 47.8792   2
   6  -1   8 636.889 55.0693   2
   6   1   8 718.412 58.6048   2
   6  -1   9 296.776 38.1454   2
   6   1   9 243.683 34.4232   2
   6   1  10 189.756 33.1768   2
   6  -1  10 187.521 35.0345   2
   6   1  11 152.429 32.8232   2
   6  -1  11 160.349 32.1691   2
   6   1  12 42.2249 16.6002   2
   6  -1  12 30.6409 6.20885   2
   6  -1  13 27.1999 11.4108   2
   6   1  13 37.0664 17.0496   2
   6   1  14 12.2195 12.1129   2
  -6   1 -15-2.10461 10.7525   3
   6   1  15 1.14767 10.7453   2
  -6   1 -16 11.4935 8.46491   3
  -6  -1 -16 23.5327 14.4055   3
   6   1  16 2.26562 16.8364   2
  -6   1 -17 41.1593 23.1260   3
  -6  -1 -17 19.2751 12.4601   3
  -6   1 -18 68.9306 23.3568   3
  -6  -1 -18 69.5340 22.7189   3
  -6  -1 -19 80.1515 23.7090   3
   6   2 -22 28.1727 15.3917   3
   6  -2 -22 33.0743 10.8064   3
   6  -2 -21 136.424 24.0325   3
   6   2 -21 124.503 25.4111   3
   6  -2 -20 0.26486 10.1045   3
   6   2 -20 3.30620 11.0434   3
   6  -2 -19 104.038 19.4595   3
   6   2 -19 102.444 21.8836   3
   6   2 -18 29.9605 10.7783   3
   6  -2 -18 38.7949 13.5040   3
   6  -2 -17 35.9328 9.11128   3
   6   2 -17 38.0011 14.4600   3
   6  -2 -16 35.9734 7.28752   3
   6   2 -16 44.9725 13.6146   3
   6   2 -16 28.6501 7.23919   1
   6  -2 -15-6.95319 7.58513   2
   6  -2 -15 1.89469 3.71609   2
   6  -2 -15 6.32609 4.27237   3
   6   2 -15-0.25002 7.91673   3
   6  -2 -14 94.6019 14.3981   3
   6  -2 -14 153.618 17.7202   2
   6  -2 -14 136.492 11.2669   2
   6   2 -14 123.371 21.0018   3
  -6   2  14 122.052 17.5698   3
   6  -2 -13 343.992 18.4130   2
  -6   2  13 343.368 29.3309   3
   6  -2 -13 311.568 28.2891   3
   6  -2 -13 86.3111 18.0332   2
   6   2 -13 330.986 33.7582   3
   6  -2 -12 15.0220 5.70028   3
   6   2 -12 15.1670 9.72163   3
  -6   2  12 14.7348 7.19519   3
   6  -2 -12 19.4272 4.39192   2
   6  -2 -11 754.218 42.0409   3
   6   2 -11 774.820 48.6442   3
  -6   2  11 792.342 43.0512   3
   6  -2 -11 840.682 27.8214   2
   6  -2 -10 20.0311 5.23763   3
   6   2 -10 26.9016 7.81100   3
   6  -2 -10 28.0684 4.47462   2
  -6   2  10 21.4803 5.57329   3
  -6  -2  10 33.2521 11.8203   3
  -6   2   9 1454.01 56.8494   3
  -6  -2   9 1598.10 65.9126   3
   6   2  -9 1437.60 54.3778   2
   6  -2  -9 1553.69 40.2564   2
   6   2  -9 1429.21 63.8062   3
   6  -2  -9 1459.12 57.2694   3
   6  -2  -8 64.0838 10.8128   3
   6   2  -8 76.2187 12.0636   2
   6   2  -8 63.0811 12.8726   3
  -6   2   8 59.7075 10.7289   3
  -6  -2   8 68.5038 13.0449   3
   6  -2  -8 96.2495 8.92298   2
  -6   2   7 1117.02 46.2474   3
   6  -2  -7 1115.63 37.2436   2
  -6  -2   7 1116.02 51.5563   3
   6   2  -7 1055.96 51.2687   3
   6   2  -7 1103.89 45.1411   2
   6  -2  -7 1110.62 49.0263   3
   6   2  -6 7.12494 5.75327   3
  -6   2   6 5.31230 2.38903   2
  -6   2   6 10.8779 5.01224   3
  -6  -2   6 3.81115 2.10337   3
   6  -2  -6 1.33249 3.89658   2
   6   2  -6 6.89391 3.77190   2
   6  -2  -6 8.53165 5.48410   3
  -6   2   5 431.946 19.6495   2
   6   2  -5 519.712 29.1398   2
   6  -2  -5 420.908 26.0188   2
  -6  -2   5 472.988 30.6458   3
   6  -2  -5 457.112 30.1084   3
  -6   2   5 409.335 25.5989   3
   6   2  -5 423.171 29.6503   3
  -6   2   4 62.3048 10.2904   3
   6   2  -4 75.1846 12.2422   3
   6   2  -4 66.8361 10.3544   2
   6  -2  -4 65.6792 11.2134   2
  -6   2   4 67.7713 8.33755   2
  -6  -2   4 58.0291 9.77857   3
  -6   2   3 2.48177 3.69935   3
   6   2  -3 4.76780 5.74987   2
   6  -2  -3-2.78293 6.52012   2
  -6   2   3 7.99133 4.31197   2
  -6  -2   3-2.51060 5.70662   3
   6   2  -3 3.23552 5.27162   3
  -6  -2   3 8.55018 4.06964   2
  -6  -2   2 110.103 12.6504   2
   6  -2  -2 103.404 15.4357   2
  -6   2   2 120.900 13.0549   2
   6   2  -2 99.0064 13.6650   2
  -6  -2   2 91.0653 12.7683   3
   6   2  -2 97.9261 13.9206   3
  -6   2   2 93.4569 12.2478   3
   6   2  -1 228.846 22.8285   2
   6   2  -1 153.776 17.6333   3
  -6   2   1 211.151 19.8134   2
  -6  -2   1 158.414 15.8716   2
   6  -2  -1 197.101 21.4125   2
  -6   2   1 169.506 16.9875   3
  -6  -2   1 148.799 16.3327   3
  -6  -2   0 1.49836 3.30127   3
   6  -2   0 8.64627 9.19725   2
  -6  -2   0 4.13384 4.55932   2
  -6   2   0 12.5084 6.48249   2
   6   2   0 5.39099 3.83937   2
  -6   2  -1 458.759 32.1791   2
   6   2   1 455.297 35.7770   2
  -6  -2  -1 469.627 28.9906   2
   6  -2   1 540.791 40.4807   2
  -6  -2  -1 518.402 31.2220   3
   6  -2   2 18.3441 9.32290   2
  -6  -2  -2 37.6088 9.21267   2
  -6   2  -2 37.0279 9.24480   2
   6   2   2 45.4130 12.3019   2
  -6  -2  -2 41.8887 9.22165   3
  -6  -2  -3 749.081 39.3872   3
  -6   2  -3 405.655 50.8459   2
   6   2   3 586.297 45.7002   2
  -6  -2  -3 623.211 35.4044   2
   6  -2   3 686.771 49.1898   2
   6   2   4 0.66948 8.05114   2
  -6   2  -4-1.80717 5.51890   2
   6  -2   4-7.47546 7.54932   2
  -6  -2  -4 0.31598 2.71281   2
  -6   2  -5 639.635 50.0251   2
  -6  -2  -5 594.770 41.1367   2
   6   2   5 543.100 47.1709   2
   6  -2   5 552.422 47.3216   2
   6   2   6-3.28226 6.40528   2
  -6   2  -6 3.74013 7.46988   2
  -6  -2  -6 12.5678 8.93499   2
   6  -2   6 16.1540 13.8314   2
   6   2   7 60.8187 19.2931   2
   6  -2   7 47.0862 16.2155   2
   6   2   8-0.79965 9.97196   2
   6  -2   8-2.20425 8.39696   2
   6   2   9 36.2273 16.6461   2
   6  -2   9 51.0866 21.8197   2
   6   2  10 5.15932 11.4593   2
   6  -2  10-6.52723 12.1389   2
   6  -2  11 277.377 44.4443   2
   6   2  11 263.011 38.5528   2
   6   2  12 56.1015 13.4789   2
   6   2  13 115.994 29.6201   2
   6   2  14 25.6215 7.77562   2
   6   2  15 125.904 35.8155   2
  -6   2 -15 143.259 28.4518   3
   6  -2  16 23.4677 9.61717   1
  -6   2 -16 5.94979 5.97734   3
  -6  -2 -16 4.16599 6.10522   3
   6   2  16 23.1723 22.8255   2
  -6   2 -17 21.4524 5.61474   3
  -6  -2 -17 35.3535 18.7406   3
   6   2  17 39.4574 29.3816   2
  -6   2 -18-6.31764 16.5929   3
  -6  -2 -18 11.1025 9.83957   3
  -6  -2 -19-7.59102 11.5120   3
   6   3 -22 10.3123 10.0573   3
   6   3 -21 26.1475 16.2204   3
   6  -3 -20-12.8224 9.54716   3
   6   3 -20-1.32146 8.95888   3
   6  -3 -19-1.59771 7.28594   3
   6   3 -19 5.01566 5.58260   3
   6  -3 -18 63.6032 14.2566   3
   6   3 -18 79.3489 22.5952   3
   6   3 -17 34.3424 14.4375   3
   6  -3 -17 51.0143 12.1087   3
   6  -3 -16 302.797 27.9174   3
   6   3 -16 302.127 36.8316   3
   6  -3 -16 258.485 14.2685   2
   6   3 -16 147.283 19.0534   1
   6  -3 -15 65.2436 5.80638   2
   6   3 -15 77.4886 18.2373   3
  -6   3  15 70.0835 13.7042   3
   6   3 -15 64.1995 14.4725   1
   6  -3 -15 87.7054 16.0786   3
  -6   3  14 748.689 44.1304   3
   6   3 -14 630.350 49.2223   3
   6  -3 -14 553.910 19.2151   2
   6  -3 -14 684.486 41.2916   3
   6   3 -13 87.0277 17.9158   3
  -6   3  13 70.5209 14.4398   3
   6  -3 -13 64.1370 5.30951   2
   6  -3 -13 80.4600 11.5857   3
   6  -3 -12 122.195 15.9296   3
   6   3 -12 130.311 19.5423   3
  -6   3  12 122.913 16.0291   3
   6  -3 -12 102.910 6.44786   2
   6   3 -11 118.761 18.8661   3
   6  -3 -11 94.6916 6.86410   2
  -6   3  11 102.594 11.8810   3
   6  -3 -11 112.637 15.1698   3
   6   3 -10 1.53708 3.32582   3
   6  -3 -10 6.90825 6.85612   3
  -6   3  10 12.8005 5.00287   3
   6  -3 -10-1.06871 1.94347   2
   6   3  -9 11.0581 5.10196   3
  -6   3   9 12.8250 4.25483   3
   6  -3  -9 16.9811 3.57395   2
  -6  -3   9 21.8420 7.97843   3
   6  -3  -9 24.4834 7.72601   3
   6   3  -8 27.7967 7.72232   2
   6  -3  -8 33.0033 8.02395   3
   6   3  -8 29.4592 9.74859   3
  -6   3   8 16.2763 6.66614   3
   6  -3  -8 25.0354 5.55845   2
  -6  -3   8 16.8627 4.15292   3
   6  -3  -7 72.5522 12.7436   3
  -6  -3   7 93.9949 16.5901   3
  -6   3   7 81.3677 10.6625   3
   6   3  -7 90.7942 16.6346   3
   6   3  -7 80.8641 12.2089   2
   6  -3  -7 76.0726 9.54150   2
  -6   3   6 224.884 18.2393   3
  -6  -3   6 265.250 23.6447   3
   6   3  -6 237.547 20.3129   2
  -6   3   6 236.975 12.4720   2
   6  -3  -6 240.656 21.2930   3
   6  -3  -6 208.294 16.0161   2
   6   3  -6 201.982 21.0529   3
   6   3  -5 107.891 14.0069   2
  -6  -3   5 95.9822 15.7181   3
   6   3  -5 93.4866 14.4847   3
   6  -3  -5 93.8028 12.5766   2
  -6   3   5 97.4108 8.67363   2
  -6   3   5 92.9506 11.4424   3
  -6  -3   4 1112.86 49.9250   3
   6   3  -4 931.666 44.2238   2
  -6   3   4 1202.29 36.6242   2
   6  -3  -4 1155.14 46.5427   2
  -6   3   4 1056.15 43.3200   3
   6   3  -4 1092.60 50.2072   3
  -6   3   3 2.89646 4.45931   3
   6   3  -3 9.16301 7.05120   3
  -6  -3   3-0.97049 3.93768   2
  -6  -3   3-0.03786 4.67916   3
   6   3  -3 4.21206 3.60969   2
  -6   3   3 2.06998 2.50408   2
   6  -3  -3 6.47375 9.14555   2
  -6  -3   2 1142.96 48.4843   3
  -6   3   2 1106.16 45.5855   2
  -6  -3   2 1175.65 47.6195   2
   6   3  -2 1253.62 51.1500   2
   6  -3  -2 1251.44 54.7777   2
  -6   3   2 1166.58 47.5990   3
   6   3  -2 1121.90 51.0494   3
   6  -3  -1 46.4080 11.7816   2
   6   3  -1 44.6946 11.2844   2
   6   3  -1 50.1316 11.5505   3
  -6   3   1 32.1764 7.87091   2
  -6  -3   1 31.2317 6.90710   3
  -6  -3   1 44.6992 9.44687   2
  -6  -3   0 443.407 29.1480   2
  -6   3   0 647.932 39.4505   2
   6   3   0 280.416 26.1647   2
   6  -3   0 560.170 39.5020   2
  -6  -3   0 561.057 31.6239   3
  -6  -3  -1 116.967 14.6592   2
   6   3   1 116.979 17.5692   2
  -6   3  -1 115.423 16.7015   2
   6  -3   1 118.600 18.5474   2
  -6  -3  -1 101.536 13.3137   3
  -6  -3  -2-2.03428 2.36800   3
  -6  -3  -2 3.74102 6.10815   2
  -6   3  -2 7.13515 8.43317   2
   6   3   2-1.04928 7.03928   2
   6  -3   2 2.89229 6.19476   2
   6   3   3 570.394 42.4226   2
   6  -3   3 585.524 45.2000   2
  -6  -3  -3 552.110 33.6369   2
  -6   3  -3 599.682 42.5738   2
  -6  -3  -3 590.196 34.4393   3
  -6   3  -4 64.9970 11.8356   2
   6   3   4 73.3559 15.8286   2
  -6  -3  -4 82.0628 14.4282   2
   6  -3   4 59.9034 18.2551   2
  -6  -3  -4 72.7978 12.3097   3
   6   3   5 289.476 38.1426   2
  -6   3  -5 340.754 33.9595   2
  -6  -3  -5 406.606 29.2316   2
   6  -3   5 345.385 37.3905   2
   6   3   6 169.766 27.1004   2
  -6  -3  -6 199.743 22.1566   2
   6  -3   6 199.880 31.5924   2
   6  -3   7 674.016 58.7749   2
   6   3   7 677.350 54.7265   2
   6   3   8 191.674 30.3362   2
   6  -3   8 176.530 32.3953   2
   6  -3   9 488.459 52.9319   2
   6   3   9 421.378 45.5692   2
   6   3  10 309.060 40.6529   2
   6   3  11 281.532 38.9104   2
   6   3  12 68.3349 19.4194   2
   6   3  13 79.2283 28.3605   2
  -6   3 -14 5.72773 10.9290   3
   6   3  14-13.2799 10.2931   2
  -6   3 -15-0.67371 12.5813   3
   6   3  15 17.8941 18.4102   2
   6  -3  15-3.80526 9.50602   1
   6   3  16 29.5795 24.3871   2
  -6   3 -16 67.3909 24.0028   3
  -6  -3 -16 61.5379 11.7537   3
   6  -3  16 94.0954 19.3931   1
  -6   3 -17 4.86595 18.9010   3
  -6  -3 -17-2.50920 9.14050   3
   6   3  17-14.2005 15.4479   2
  -6  -3 -18 114.638 24.6290   3
   6   3  18 53.3900 35.1125   2
  -6  -3 -19 20.3966 13.5720   3
   6   4 -21 43.9926 17.1048   3
   6   4 -20 85.2035 22.9251   3
   6   4 -19 45.0483 16.1157   3
   6  -4 -19 28.0471 10.1216   3
   6  -4 -18 92.0472 15.9379   3
   6   4 -18 90.6971 19.3132   3
   6  -4 -17 44.7551 12.8525   3
   6   4 -17 46.9149 19.4944   3
   6  -4 -16 11.0911 5.97482   3
   6   4 -16 15.9306 4.72769   3
   6  -4 -15 10.5803 4.21385   3
   6   4 -15 25.3474 12.9030   3
   6   4 -15 11.5214 4.25940   1
  -6   4  15 9.91632 7.25899   3
   6   4 -14 46.1222 8.76756   1
   6   4 -14 119.285 22.5073   3
   6  -4 -14 110.917 14.7946   3
   6  -4 -14 48.8650 5.23578   1
  -6   4  14 115.575 15.6655   3
   6  -4 -13 16.1610 8.17027   3
   6   4 -13 4.85385 9.39862   3
  -6   4  13-12.0070 7.64044   3
   6   4 -12 375.524 37.0859   3
  -6   4  12 425.611 29.5591   3
   6  -4 -12 399.427 29.0034   3
   6   4 -11 6.80903 9.06369   3
   6  -4 -11-1.70095 3.30150   3
  -6   4  11 1.54101 2.62722   3
   6   4 -10 851.602 53.3133   3
  -6   4  10 856.737 41.0698   3
   6  -4 -10 906.556 43.3451   3
   6   4  -9-0.34039 5.89288   3
  -6   4   9 2.58955 3.99859   3
   6  -4  -9-2.40769 6.86647   3
   6   4  -8 700.131 44.0772   3
  -6   4   8 740.814 35.5241   3
  -6  -4   8 828.596 48.1207   3
   6   4  -8 669.534 39.8229   2
   6  -4  -8 747.034 38.5796   3
  -6   4   7 60.1485 8.28285   3
   6   4  -7 60.5425 11.9535   3
  -6  -4   7 62.7639 13.8067   3
   6   4  -7 53.4187 10.8104   2
  -6   4   6 500.972 27.4081   3
   6   4  -6 510.692 35.0225   3
  -6  -4   6 512.916 35.0270   3
   6   4  -6 465.086 32.0564   2
   6  -4  -6 365.644 24.1525   2
  -6   4   6 510.153 17.5791   2
  -6   4   5 1.88314 1.81561   2
  -6  -4   5-0.88880 4.14290   3
   6   4  -5 3.71089 6.32764   3
   6   4  -5-0.88031 4.75068   2
  -6   4   5 0.40587 3.28820   3
   6  -4  -5-0.63282 3.07468   2
  -6  -4   4 248.601 22.2636   3
   6   4  -4 212.962 22.0901   3
  -6   4   4 222.716 16.0234   2
   6   4  -4 254.797 22.7593   2
   6  -4  -4 283.714 22.0152   2
  -6   4   4 231.422 19.1160   3
  -6  -4   3 167.326 17.8139   3
  -6   4   3 163.104 15.2384   2
   6   4  -3 215.519 20.4892   2
   6   4  -3 197.144 21.1055   3
   6  -4  -3 203.895 20.4304   2
  -6   4   3 181.231 17.5911   3
  -6  -4   2 81.9011 11.7437   3
  -6   4   2 97.7328 14.5756   2
  -6  -4   2 102.987 14.1553   2
   6   4  -2 97.1390 15.2332   2
   6  -4  -2 104.315 14.7499   2
   6   4  -2 105.271 15.4429   3
  -6  -4   1 2.82037 5.00802   3
   6   4  -1 2.87625 4.00610   2
   6  -4  -1-5.14588 9.15525   2
  -6   4   1-2.64391 2.94857   2
  -6  -4   1 4.03042 6.33652   2
   6   4  -1 0.85637 4.05044   3
  -6   4   0 499.138 35.1251   2
  -6  -4   0 544.685 31.9269   3
  -6  -4   0 597.997 34.1508   2
   6   4   0 532.178 34.4734   2
   6  -4   0 546.145 41.1929   2
   6   4   0 509.869 33.7038   3
  -6  -4  -1 97.8825 14.8179   2
  -6  -4  -1 105.977 13.4671   3
  -6   4  -1 107.787 16.5941   2
   6  -4   1 119.092 19.4012   2
   6   4   1 126.417 18.4899   2
  -6  -4  -2 574.147 34.8928   2
   6   4   2 580.055 40.2950   2
   6  -4   2 615.046 47.3308   2
  -6  -4  -2 566.317 33.2375   3
  -6   4  -2 564.384 41.2946   2
  -6  -4  -3 243.307 21.7448   3
  -6  -4  -3 187.832 19.4829   2
   6   4   3 140.002 21.6256   2
   6  -4   3 275.786 34.1109   2
  -6   4  -3 243.483 26.6386   2
  -6  -4  -4 579.219 34.8306   3
   6   4   4 454.837 39.9605   2
   6  -4   4 629.975 52.3207   2
  -6  -4  -4 590.859 36.7751   2
  -6   4  -4 552.063 43.1887   2
  -6   4  -5 65.7380 19.3259   2
  -6  -4  -5 55.1372 13.5519   2
   6   4   5 39.7547 15.6309   2
   6  -4   5 47.9881 13.0756   2
  -6  -4  -5 62.9781 11.6295   3
  -6  -4  -6 194.443 20.5472   3
   6   4   6 75.6336 27.0232   2
   6  -4   6 145.297 23.7958   2
   6   4   7 3.05652 9.30171   2
   6   4   8-12.1731 10.8911   2
   6   4   9 5.84941 12.0768   2
   6   4  10 197.440 30.3105   2
   6   4  11 65.2510 23.3732   2
   6   4  12 226.014 37.3305   2
   6   4  13 72.7404 18.3939   2
  -6   4 -13 74.3139 21.3773   3
   6  -4  13 87.7061 21.4957   1
   6   4  14 201.539 39.4029   2
   6  -4  14 170.856 29.4290   1
  -6   4 -14 176.096 31.7959   3
  -6   4 -15 30.2817 14.8859   3
   6  -4  15 43.1296 8.65503   1
   6   4  15 36.5175 21.0723   2
   6   4  16 57.0322 27.8854   2
  -6   4 -16 49.7069 18.2749   3
  -6  -4 -16 30.9559 11.4320   3
   6  -4  16 69.2213 15.4881   1
  -6   4 -17 11.9036 16.9533   3
  -6  -4 -17 72.0927 19.7132   3
   6  -4  17 32.6427 8.83811   1
   6   4  17 22.9739 10.2375   2
   6   4  18-3.54951 15.3679   2
   6   5 -20-10.0634 4.49445   3
   6   5 -19 85.8606 24.1341   3
   6   5 -18 47.7627 19.0489   3
   6  -5 -18 18.8824 8.42887   3
   6   5 -17 248.592 37.3572   3
   6  -5 -17 268.672 25.1989   3
   6  -5 -16 36.7986 7.81527   3
   6   5 -16 52.9190 18.3859   3
   6   5 -15 338.168 39.1357   3
   6  -5 -15 311.484 26.4919   3
   6  -5 -14 65.4842 12.2298   3
   6   5 -14 80.4857 20.7062   3
  -6   5  14 85.8487 13.5987   3
   6   5 -13 160.162 26.0050   3
   6  -5 -13 171.509 12.6922   1
   6  -5 -13 218.899 21.4447   3
   6   5 -12 77.0543 16.9658   3
  -6   5  12 91.3643 12.6375   3
   6  -5 -12 81.2951 12.5368   3
   6  -5 -12 56.9432 9.31565   1
  -6   5  11 95.4300 12.8667   3
   6  -5 -11 88.7666 13.2218   3
   6   5 -11 77.0112 15.3719   3
   6   5 -10 52.8931 12.8212   3
  -6   5  10 49.9831 8.55541   3
   6  -5 -10 53.5918 10.3936   3
   6   5  -9 6.50103 7.41483   3
  -6   5   9 16.1949 7.19288   3
   6   5  -8 0.59481 4.36120   3
  -6   5   8-3.11646 3.78075   3
   6   5  -7 336.814 30.5815   3
  -6   5   7 313.017 20.8255   3
  -6  -5   7 337.803 30.2842   3
   6   5  -7 312.054 27.9524   2
  -6   5   6 7.28749 2.00510   2
  -6  -5   6 13.2976 6.10380   3
  -6   5   6 13.9802 5.19742   3
   6   5  -6 7.47822 5.55812   2
   6   5  -6 12.3421 5.44914   3
   6   5  -5 957.410 48.8327   2
  -6   5   5 1161.63 35.1641   2
  -6  -5   5 1163.57 54.8434   3
  -6   5   5 1032.91 41.5263   3
   6   5  -5 1081.15 53.0282   3
  -6   5   4 7.49659 3.16116   3
  -6  -5   4 13.7847 6.46829   3
  -6   5   4 15.0074 5.39320   2
   6   5  -4 23.3030 9.48821   2
   6   5  -4 17.1296 7.87210   3
   6   5  -3 1042.30 51.3146   2
  -6  -5   3 1295.17 54.3525   3
  -6   5   3 821.730 46.3584   2
   6   5  -3 1296.09 55.3234   3
  -6   5   3 1214.64 47.9443   3
  -6  -5   2 47.8596 11.2711   3
  -6   5   2 78.7928 14.0854   2
   6   5  -2 66.7383 13.8089   2
   6   5  -2 42.1752 7.81104   3
  -6  -5   1 606.584 35.6322   3
  -6  -5   1 617.531 36.3328   2
   6   5  -1 620.370 36.6511   3
  -6   5   1 610.827 37.3770   2
   6   5  -1 654.144 39.8129   2
  -6  -5   0 127.507 15.1924   3
  -6   5   0 133.046 18.8549   2
  -6  -5   0 188.396 19.9906   2
   6   5   0 142.397 17.5599   3
   6   5   0 139.009 18.6683   2
   6   5   1 28.0532 10.4429   2
  -6  -5  -1 20.6358 6.36902   3
  -6   5  -1 44.7101 11.1735   2
  -6  -5  -1 22.4772 8.06150   2
  -6  -5  -2 135.967 17.5438   2
  -6   5  -2 123.873 19.3992   2
   6   5   2 168.910 21.9355   2
  -6  -5  -2 119.184 15.8568   3
  -6  -5  -3 11.7263 4.65471   3
  -6   5  -3 13.6985 10.1948   2
  -6  -5  -3 7.89811 3.65710   2
   6   5   3 8.58800 7.38779   2
  -6  -5  -4 58.5106 11.1646   3
  -6   5  -4 79.6037 14.0887   2
  -6  -5  -4 73.5043 14.7597   2
   6   5   4 63.5806 13.9633   2
   6   5   5 146.173 23.4227   2
  -6  -5  -5 153.713 18.4706   3
  -6  -5  -6 154.667 16.5045   3
   6   5   6 116.378 25.2192   2
   6   5   7 300.983 43.7227   2
  -6  -5  -7 459.743 32.0007   3
   6   5   8 81.9235 20.2193   2
  -6  -5  -8 73.0718 12.0981   3
   6   5   9 259.424 36.4798   2
  -6  -5  -9 285.890 26.4662   3
   6   5  10 89.2983 20.5890   2
   6   5  11 185.304 31.9549   2
   6   5  12 3.14978 13.5650   2
   6  -5  12 21.0151 12.2100   1
  -6   5 -12 16.1520 14.4199   3
   6   5  13-18.8554 14.9131   2
   6  -5  13 1.99604 5.75813   1
  -6   5 -13-9.01881 16.1153   3
   6  -5  14-18.6760 13.4449   1
  -6   5 -14 14.9407 14.9915   3
   6   5  14-8.36144 16.0451   2
   6   5  15 46.7745 23.9163   2
   6  -5  15 59.9931 17.1923   1
  -6   5 -15 40.3666 20.7746   3
  -6   5 -16-0.30261 7.77551   3
  -6  -5 -16 18.7852 10.2030   3
   6  -5  16-1.79230 13.8232   1
   6   5  16-5.94703 6.74578   2
   6  -5  17 115.145 25.2669   1
   6   5  17 30.7359 16.6829   2
   6   5  18 20.7264 17.2089   2
   6   5  19 14.9737 15.3513   2
   6   6 -19 185.637 35.5721   3
   6   6 -18 65.0423 19.2109   3
   6   6 -17 40.1643 10.0788   3
   6  -6 -16 38.8669 8.11995   3
   6   6 -16 28.1912 13.9511   3
   6  -6 -15 2.54941 2.96640   3
   6   6 -15-0.54597 12.5239   3
   6   6 -14 3.73948 12.3839   3
   6  -6 -14-1.66751 4.72566   3
   6   6 -13 11.7628 6.42979   3
   6  -6 -13 13.2558 6.12217   3
   6  -6 -13 17.5011 5.05996   1
  -6   6  13 14.9088 5.86116   3
   6   6 -12-7.44107 6.64853   3
  -6   6  12 11.0696 6.38256   3
   6  -6 -12-1.84871 3.72521   1
   6   6 -11 197.003 27.1264   3
  -6   6  11 214.169 18.1036   3
   6  -6 -11 182.343 16.8713   1
   6  -6 -10 12.1291 6.32148   1
   6   6 -10 8.50646 6.01536   3
  -6   6  10 15.1523 4.81797   3
   6   6  -9 458.348 38.8373   3
  -6   6   9 484.563 26.6646   3
   6   6  -8 52.6818 12.9695   3
  -6   6   8 46.7943 8.48900   3
   6   6  -7 324.237 30.6905   3
   6   6  -7 308.630 28.3080   2
  -6   6   7 292.677 19.8902   3
   6   6  -6 2.39788 5.66110   2
   6   6  -6 1.92353 5.98830   3
  -6  -6   6 1.65582 7.84626   3
  -6   6   6 1.91399 2.99490   3
   6   6  -5 85.7025 14.9798   3
  -6  -6   5 79.7189 14.6297   3
  -6   6   5 80.1021 9.24382   2
  -6   6   5 78.9423 10.9126   3
   6   6  -5 75.2511 13.7712   2
   6   6  -4 111.829 16.9644   2
   6   6  -4 103.865 15.5035   3
  -6  -6   4 122.901 16.3979   3
  -6   6   4 104.898 13.8276   2
  -6   6   4 83.7704 12.2757   3
   6   6  -3 78.7505 13.5297   3
  -6   6   3 69.7488 12.1975   2
   6   6  -3 70.6517 13.3231   2
  -6  -6   3 60.7860 11.9812   3
  -6   6   3 53.3500 8.52004   3
  -6  -6   2 343.110 27.1991   3
  -6   6   2 348.871 27.9636   2
   6   6  -2 327.155 27.4040   3
   6   6  -2 339.235 29.0612   2
  -6  -6   1 256.851 22.9794   3
  -6   6   1 247.061 23.3718   2
   6   6  -1 276.842 26.5483   2
   6   6  -1 260.656 24.9915   3
  -6  -6   0 476.672 30.9604   3
   6   6   0 428.273 33.3388   2
  -6   6   0 457.922 35.1293   2
   6   6   0 502.893 33.5771   3
  -6  -6  -1 473.904 30.3295   3
  -6  -6  -1 520.388 34.7907   2
   6   6   1 518.814 36.1191   2
  -6   6  -1 465.658 37.9751   2
  -6  -6  -2 415.629 32.3762   2
   6   6   2 373.583 31.1935   2
  -6  -6  -2 401.907 27.9070   3
  -6   6  -2 425.759 37.5419   2
   6   6   3 639.139 44.2707   2
  -6  -6  -3 541.782 32.9658   3
  -6   6  -3 575.774 45.0186   2
   6   6   4 269.969 30.5311   2
  -6  -6  -4 241.896 21.3730   3
   6   6   5 350.691 35.9075   2
  -6  -6  -5 311.953 24.9883   3
   6   6   6 89.9683 19.7723   2
  -6  -6  -6 107.583 14.2894   3
  -6  -6  -7 60.9024 11.8086   3
   6   6   7 38.3341 10.5085   2
  -6  -6  -8 7.81787 7.07457   3
   6   6   8 2.35742 19.0929   2
  -6  -6  -9 41.3308 10.4841   3
   6   6   9 19.5862 11.5773   2
  -6  -6 -10 24.1229 7.90363   3
   6   6  10 37.6684 13.4059   2
   6  -6  10 43.0410 17.1113   1
   6   6  11 137.953 25.9647   2
   6  -6  11 66.6997 22.3159   1
  -6   6 -11 150.386 31.3183   3
   6  -6  12 91.5878 20.1602   1
   6   6  12 95.6946 26.2432   2
  -6   6 -12 83.5874 25.3056   3
   6   6  13 162.222 36.8838   2
   6  -6  13 206.854 29.0952   1
  -6   6 -13 143.312 29.1528   3
   6  -6  14 153.186 26.9768   1
   6   6  14 123.768 29.7374   2
  -6   6 -14 114.030 30.2087   3
   6   6  15 127.497 33.3825   2
  -6   6 -15 135.997 27.9482   3
  -6  -6 -15 147.548 27.2152   3
   6  -6  15 163.328 23.6360   1
   6  -6  16 63.2515 17.9279   1
   6   6  16 61.8704 29.9418   2
   6  -6  17 46.4682 23.1481   1
   6   6  17 33.4329 27.7755   2
   6   6  18 7.21899 14.6677   2
   6   7 -19 41.8347 19.2853   3
   6   7 -18 164.117 31.6344   3
   6   7 -17 7.17571 10.5675   3
   6   7 -16 189.533 29.8012   3
   6   7 -15 4.60032 9.55064   3
   6   7 -14 245.643 33.9599   3
   6   7 -13 23.5119 9.14690   3
   6   7 -12 138.960 25.0410   3
  -6   7  12 125.787 14.7474   3
   6  -7 -12 183.590 17.3951   1
   6   7 -11 29.9045 10.2567   3
  -6   7  11 29.2287 6.95119   3
   6  -7 -11 20.9021 8.25038   1
   6  -7 -10 13.5191 8.29895   1
  -6   7  10 17.0774 2.72787   3
   6   7 -10 7.73991 5.34665   3
   6   7  -9 11.5553 8.03002   3
  -6   7   9 17.6897 5.19999   3
   6  -7  -9 0.12431 6.48845   1
  -6   7   8 138.388 13.8015   3
   6   7  -8 117.038 18.9016   3
   6  -7  -8 69.9729 13.5209   1
   6  -7  -7-0.06045 2.82146   1
  -6   7   7 3.60412 4.90004   3
   6   7  -7-3.80223 7.29499   3
   6   7  -7 2.70673 5.75348   2
  -6   7   6 398.410 19.1460   2
   6   7  -6 429.015 35.5445   2
   6   7  -6 395.299 35.0298   3
  -6   7   6 421.058 23.7414   3
  -6   7   5 6.18940 4.12976   3
   6   7  -5-0.46893 3.48482   3
  -6   7   5-1.56538 3.13882   2
  -6  -7   5-3.62634 5.12552   3
   6   7  -5-2.16622 5.31457   2
   6   7  -4 1403.24 63.9111   3
   6   7  -4 1443.11 64.3378   2
  -6   7   4 1582.67 57.4711   2
  -6  -7   4 1616.40 67.4785   3
  -6   7   4 1373.24 51.8515   3
  -6   7   3 0.51849 5.80538   2
  -6  -7   3 0.47343 7.93067   3
   6   7  -3 2.67334 7.86030   2
   6   7  -3 4.35899 8.72868   3
  -6  -7   2 1171.27 53.9025   3
   6   7  -2 746.093 47.6776   2
   6   7  -2 1065.22 53.0973   3
  -6   7   2 1154.11 53.9839   2
   6   7  -1 16.4818 8.00949   3
  -6   7   1 23.1310 9.32335   2
  -6  -7   1 16.6948 10.3146   3
   6   7  -1 11.6358 9.49843   2
  -6  -7   0 367.242 28.3343   3
  -6   7   0 402.830 35.1572   2
   6   7   0 446.260 35.2075   2
   6   7   0 381.671 30.0027   3
  -6   7  -1 21.0856 6.48262   2
   6   7   1 8.84571 7.44289   2
  -6  -7  -1 20.0844 5.64285   3
   6   7   1 8.19311 4.32534   3
   6   7   2-0.66941 3.19061   2
  -6   7  -2 20.9587 10.9699   2
  -6  -7  -2 2.09801 5.68567   3
  -6   7  -3 2.33032 4.37976   2
  -6  -7  -3 2.64625 6.50928   3
   6   7   3 0.81944 4.97130   2
  -6  -7  -4 3.51971 6.37062   3
   6   7   4 1.85102 5.80864   2
  -6  -7  -5 3.69231 3.89762   3
   6   7   5 11.9685 9.33405   2
  -6  -7  -6 112.508 13.2473   3
   6   7   6 119.201 18.3470   2
  -6  -7  -7 1.84854 1.97007   3
   6  -7   7-0.07436 3.89174   1
   6   7   7-11.0561 7.16150   2
   6   7   8 221.621 34.9474   2
   6  -7   8 242.484 31.5011   1
  -6  -7  -8 225.540 21.1650   3
  -6  -7  -9 2.06519 3.88925   3
   6   7   9-0.31692 5.99063   2
   6  -7   9-1.75822 9.28605   1
   6   7  10 210.512 34.2017   2
   6  -7  10 228.483 29.5515   1
  -6   7 -10 208.607 33.2691   3
   6   7  11 11.6599 8.03800   2
   6  -7  11 12.1408 15.1246   1
  -6   7 -11 27.0020 13.8581   3
   6   7  12 11.4290 14.9992   2
   6  -7  12-5.31253 11.9146   1
  -6   7 -12 4.03267 18.1181   3
   6  -7  13 3.08301 4.13203   1
   6   7  13 15.6670 7.46191   2
  -6   7 -13-11.5021 18.0141   3
   6   7  14 5.17773 20.1168   2
  -6   7 -14 10.3465 7.03305   3
   6  -7  14 11.2918 13.2674   1
   6   7  15 23.6695 18.2758   2
   6  -7  15 58.4893 19.9306   1
  -6   7 -15 24.0563 11.9471   3
   6   7  16 4.37780 18.3250   2
   6  -7  16 66.3436 20.5765   1
   6   7  17 17.9580 17.6888   2
   6  -7  17 16.5722 9.33489   1
   6   8 -18 85.8583 19.5066   3
   6   8 -17 21.9845 10.6599   3
   6   8 -16 33.8553 15.9686   3
   6   8 -15-5.45659 9.85091   3
   6   8 -14 34.9040 10.9072   3
   6   8 -13 27.0487 12.7095   3
   6   8 -12 14.7574 10.7277   3
   6  -8 -11 44.4492 10.1229   1
   6   8 -11 42.2131 14.4829   3
  -6   8  10 175.936 15.2395   3
   6   8 -10 224.926 29.4983   3
   6  -8 -10 224.310 21.3057   1
  -6   8   9 107.661 12.0009   3
   6   8  -9 128.175 22.7246   3
   6  -8  -9 165.354 20.1394   1
   6   8  -8 178.861 24.9518   3
  -6   8   8 158.555 13.5067   3
   6  -8  -8 204.837 22.0136   1
  -6   8   7 138.602 12.8386   3
   6   8  -7 151.005 21.9723   3
   6  -8  -7 160.126 22.3699   1
   6   8  -7 117.737 20.0298   2
  -6   8   6 47.9906 7.86319   3
  -6   8   6 29.2606 8.33413   2
   6   8  -6 52.8383 13.4740   3
   6   8  -6 50.6237 13.4407   2
   6  -8  -6 64.1658 12.7789   1
  -6   8   5 5.28245 2.49681   3
   6   8  -5 2.18695 7.11670   3
  -6   8   5-1.88834 3.73233   2
   6  -8  -5 3.22486 2.92597   1
   6   8  -5 2.84129 3.06717   2
   6   8  -4 12.3949 7.84366   3
  -6   8   4 1.84226 8.24667   2
   6   8  -4 5.11365 4.41442   2
   6  -8  -4 1.78466 8.53192   1
  -6   8   4 9.80496 6.60835   3
   6   8  -3 68.0167 13.6658   3
  -6  -8   3 87.6404 15.3249   3
   6  -8  -3 62.2035 16.5551   1
   6   8  -3 83.8963 15.4618   2
  -6   8   3 101.175 16.1547   2
  -6   8   2 73.1365 12.7271   2
  -6  -8   2 72.1254 11.7828   3
   6   8  -2 79.6530 14.4267   2
   6   8  -2 54.6786 12.3812   3
   6  -8  -2 56.0090 12.1677   1
  -6  -8   1 74.6165 10.9157   3
   6  -8  -1 63.7555 13.5259   1
   6   8  -1 81.1291 15.5237   3
   6   8  -1 84.3611 15.5135   2
  -6   8   1 93.1679 17.4138   2
  -6  -8   0 277.392 25.4813   3
   6  -8   0 230.302 27.2200   1
  -6   8   0 291.762 30.6834   2
   6   8   0 248.044 26.6554   2
   6   8   0 273.573 25.3030   3
  -6  -8  -1 216.885 20.4151   3
   6  -8   1 179.385 24.8912   1
   6   8   1 222.022 24.6408   2
  -6   8  -1 240.678 30.1342   2
   6   8   1 210.458 22.3399   3
  -6  -8  -2 241.652 22.2376   3
   6   8   2 201.876 23.4785   2
   6  -8   2 206.179 26.9282   1
  -6   8  -2 247.019 29.0196   2
  -6  -8  -3 260.492 23.6643   3
   6   8   3 256.149 28.2282   2
   6  -8   3 273.548 31.1613   1
  -6  -8  -4 236.310 21.4050   3
   6   8   4 259.443 29.9681   2
   6  -8   4 238.344 29.0958   1
  -6  -8  -5 178.972 18.7776   3
   6   8   5 199.196 28.1455   2
   6  -8   5 159.478 25.3982   1
  -6  -8  -6 29.7360 7.28712   3
   6  -8   6 45.2858 13.6915   1
   6   8   6 40.2415 13.2087   2
   6  -8   7 7.92913 6.84449   1
   6   8   7-3.83538 6.59488   2
  -6  -8  -8-7.52669 5.73019   3
   6   8   8 25.9097 15.2117   2
  -6   8  -8-3.78004 9.80472   3
   6  -8   8-2.81304 9.41857   1
   6   8   9 3.89322 13.5673   2
   6  -8   9 21.5717 8.23263   1
  -6   8  -9 26.2147 8.97458   3
   6  -8  10 62.9512 16.2609   1
   6   8  10 40.8829 13.5757   2
  -6   8 -10 68.1530 20.8143   3
   6   8  11 63.8521 21.1567   2
  -6   8 -11 62.4665 15.1074   3
   6  -8  11 69.3526 19.4386   1
   6   8  12 198.726 36.9929   2
  -6   8 -12 219.934 36.7289   3
   6  -8  12 216.718 30.0949   1
   6   8  13 97.1883 29.2576   2
   6  -8  13 82.7805 21.6727   1
  -6   8 -13 93.7844 24.5984   3
   6   8  14 170.168 41.7441   2
   6  -8  14 214.218 35.2195   1
  -6   8 -14 162.097 35.6000   3
   6  -8  15 60.2395 18.3504   1
   6   8  15 83.4269 26.7408   2
   6  -8  16 103.981 23.5978   1
   6   8  16 3.90443 23.1900   2
   6  -8  17 39.2920 15.2375   1
   6   9 -17 222.022 41.6537   3
   6   9 -16 6.62064 8.38917   3
   6   9 -15 285.015 39.5022   3
   6   9 -14 13.8651 10.7352   3
   6   9 -13 224.361 34.6370   3
   6   9 -12 3.17246 12.4695   3
   6   9 -11 89.2960 18.5875   3
   6   9 -10 11.6339 8.66097   3
   6  -9 -10 4.27050 3.86595   1
   6  -9  -9 39.0294 8.85684   1
   6   9  -9 35.0149 11.1213   3
   6   9  -8 6.90665 10.1741   3
  -6   9   8 2.22508 1.95723   3
   6  -9  -8 10.8742 6.38338   1
   6   9  -8 15.6761 10.0071   2
   6   9  -7 111.398 19.7187   3
  -6   9   7 92.7557 7.61047   2
  -6   9   7 102.799 11.0377   3
   6   9  -7 130.711 21.2191   2
   6  -9  -7 138.284 21.1613   1
  -6   9   6 54.0636 8.71716   3
   6   9  -6 64.9548 17.5605   3
  -6   9   6 103.583 13.9130   2
   6   9  -6 66.4442 15.9490   2
   6  -9  -6 69.4539 14.0412   1
   6   9  -5 292.770 30.9622   3
   6   9  -5 307.142 33.2246   2
   6  -9  -5 343.348 33.1301   1
  -6   9   5 318.435 21.5289   3
  -6   9   5 356.139 25.9891   2
   6   9  -4 68.9568 14.9298   3
  -6   9   4 84.3000 17.2506   2
   6  -9  -4 71.0251 16.2133   1
   6   9  -4 61.4779 13.2351   2
  -6   9   4 85.0949 12.0972   3
   6   9  -3 1037.59 58.6687   2
   6   9  -3 1024.44 55.8050   3
   6  -9  -3 1033.54 60.3373   1
  -6   9   3 1128.77 57.1375   2
   6   9  -2 1.50307 2.83262   3
  -6  -9   2 5.59133 4.96816   3
  -6   9   2 8.83979 9.47185   2
   6   9  -2-0.76030 4.78397   2
   6  -9  -2-1.99202 7.27204   1
  -6  -9   1 689.014 41.9564   3
   6  -9  -1 676.120 49.0903   1
  -6   9   1 760.608 50.2924   2
   6   9  -1 707.464 48.0933   2
   6   9  -1 675.008 43.8249   3
  -6   9   0 2.84296 8.13648   2
  -6  -9   0 13.5208 4.66533   3
   6   9   0 25.3970 8.07433   2
   6   9   0 12.4087 5.26415   3
   6  -9   0 23.0736 11.5072   1
   6   9   1 200.147 22.6184   3
  -6  -9  -1 208.095 21.9908   3
   6  -9   1 175.968 26.2836   1
   6   9   1 164.965 23.1831   2
  -6   9  -1 202.999 29.8977   2
   6   9   2 29.8104 9.19665   2
  -6  -9  -2 27.3536 6.16589   3
   6  -9   2 38.4902 12.2529   1
  -6  -9  -3 1.13517 4.56769   3
   6   9   3-2.02091 6.36071   2
   6  -9   3 2.08172 4.11010   1
   6   9   4 41.0983 15.0926   2
  -6  -9  -4 28.6843 8.66730   3
   6  -9   4 33.9571 12.6694   1
  -6  -9  -5 70.5157 11.1835   3
   6  -9   5 68.4942 15.8506   1
   6   9   5 72.9295 14.6974   2
  -6  -9  -6-6.82822 2.50674   3
   6  -9   6 3.79180 11.5251   1
   6   9   6-5.42356 5.92820   2
  -6   9  -6-11.8496 10.7747   3
   6  -9   7 135.991 24.9563   1
   6   9   7 153.279 26.6028   2
  -6   9  -7 162.983 26.6268   3
   6  -9   8 3.64276 7.85153   1
   6   9   8-1.84169 6.84643   2
  -6   9  -8 2.68065 5.91582   3
   6   9   9 145.678 31.8065   2
  -6   9  -9 114.008 23.2322   3
   6  -9   9 143.292 24.8216   1
   6   9  10 27.0899 9.40827   2
  -6   9 -10 23.5575 19.3378   3
   6  -9  10 10.3305 4.25572   1
   6   9  11 52.9906 20.1284   2
   6  -9  11 68.2244 19.4616   1
  -6   9 -11 36.4916 15.7546   3
   6   9  12 17.3664 15.1309   2
   6  -9  12-3.42050 7.64916   1
  -6   9 -12 13.5433 19.1013   3
   6   9  13 5.56283 19.1294   2
   6  -9  13 14.7905 12.0201   1
  -6   9 -13-7.09231 14.0528   3
   6   9  14-9.06004 16.9493   2
   6  -9  14 11.6444 15.7966   1
   6  -9  15 19.2174 16.9682   1
   6   9  15 49.1567 21.7332   2
   6  10 -16 26.8115 18.3443   3
   6  10 -15 20.4331 5.52262   3
   6  10 -14 21.3829 20.3975   3
   6  10 -13-3.92766 6.67750   3
   6  10 -12 76.6514 19.1737   3
   6  10 -11 27.1015 12.4960   3
   6  10 -10 256.732 34.3101   3
   6  10  -9 47.5884 13.8155   3
   6 -10  -9 48.0230 12.0518   1
   6  10  -8 104.569 18.7246   2
   6 -10  -8 132.306 21.2867   1
   6  10  -8 115.885 22.2370   3
   6 -10  -7 7.21318 4.00944   1
   6  10  -7 3.75145 8.55649   3
  -6  10   7 3.49684 2.89611   2
   6  10  -7 20.2164 8.10667   2
   6  10  -6 41.8394 10.6338   3
   6  10  -6 38.8812 14.0704   2
   6 -10  -6 53.8286 12.7837   1
  -6  10   5-9.09164 8.02098   2
   6 -10  -5 2.45400 7.79318   1
  -6  10   5-4.92517 5.85199   3
   6  10  -5 15.6385 8.43672   2
   6  10  -5 3.31302 7.10939   3
  -6  10   4-10.7177 9.90371   2
   6  10  -4-2.30093 6.76953   3
   6 -10  -4 3.25932 8.35240   1
   6  10  -4-5.20231 7.52558   2
  -6  10   4-5.61334 2.25401   3
  -6  10   3-0.11173 3.62421   2
   6  10  -3 27.4808 9.63514   3
   6  10  -3 24.1591 6.77226   2
   6 -10  -3 26.0713 8.28893   1
  -6  10   2 36.2689 8.06210   2
   6  10  -2 8.59131 4.77598   2
   6  10  -2 16.6146 2.96435   3
   6 -10  -2 16.5692 9.68083   1
   6  10  -1 107.474 18.0297   3
   6 -10  -1 114.234 22.6861   1
  -6  10   1 104.739 13.1462   2
  -6 -10   1 116.239 17.8818   3
   6  10  -1 126.615 21.6558   2
   6  10   0 302.446 28.7549   3
  -6 -10   0 269.761 25.9760   3
   6 -10   0 231.938 30.4907   1
   6  10   0 261.519 29.8989   2
  -6 -10  -1 314.721 26.6467   3
   6 -10   1 370.411 38.7569   1
   6  10   1 341.490 33.2313   2
   6  10   1 389.486 31.5941   3
  -6 -10  -2 223.421 21.4976   3
   6 -10   2 165.863 26.4243   1
   6  10   2 195.062 26.4958   2
  -6 -10  -3 274.879 24.5910   3
   6 -10   3 278.255 33.6808   1
  -6  10  -3 230.956 28.7836   3
   6  10   3 312.931 32.1353   2
   6 -10   4 138.658 24.5403   1
  -6 -10  -4 153.068 18.5440   3
  -6  10  -4 155.612 22.3643   3
   6  10   4 72.4063 16.7188   2
   6 -10   5 52.1536 16.0971   1
  -6  10  -5 40.8310 12.9877   3
   6  10   5 60.0965 14.9753   2
  -6  10  -6 82.9951 17.3286   3
   6  10   6 82.6696 21.9716   2
   6 -10   6 92.4884 19.2036   1
   6  10   7-0.69961 14.2897   2
  -6  10  -7 5.47514 10.6259   3
   6 -10   7-1.21889 10.8154   1
   6  10   8 1.41849 5.34617   2
  -6  10  -8 2.15143 5.80662   3
   6 -10   8 5.84848 4.99992   1
   6  10   9 3.10609 8.21446   2
   6 -10   9 25.1955 12.3248   1
  -6  10  -9 28.9182 14.5447   3
   6 -10  10 11.5092 9.91710   1
   6  10  10-2.31215 14.4117   2
  -6  10 -10 23.1870 7.34019   3
   6 -10  11 157.793 29.0814   1
   6  10  11 147.268 30.3128   2
  -6  10 -11 135.931 30.5061   3
   6 -10  12 65.6965 19.6417   1
   6  10  12 57.9846 23.8949   2
  -6  10 -12 55.2825 24.5245   3
   6  10  13 123.126 33.3041   2
   6 -10  13 124.386 25.2764   1
   6  10  14 40.2775 25.2234   2
   6  11 -15 5.07047 14.5034   3
   6  11 -14 250.197 37.0368   3
   6  11 -13 8.41960 5.50999   3
   6  11 -12 98.8415 24.6402   3
   6  11 -11-1.57969 12.9036   3
   6  11 -10 2.81901 5.09546   3
   6  11  -9 3.08688 11.5683   2
   6  11  -9 5.19607 4.44003   3
   6  11  -8 54.2580 15.6834   2
   6  11  -8 55.5498 15.0574   3
   6 -11  -8 67.7306 15.1430   1
   6  11  -7 14.1625 7.65970   2
   6  11  -7 4.06975 10.3259   3
   6 -11  -7-5.50892 12.1292   1
   6  11  -6 209.661 27.5031   3
   6 -11  -6 249.593 31.2020   1
   6  11  -6 259.313 33.8063   2
  -6  11   5 7.07390 3.98205   3
   6 -11  -5 7.17265 6.07073   1
   6  11  -5-2.42227 3.80097   2
   6  11  -5 16.6925 8.13831   3
   6  11  -4 579.528 47.2156   2
   6 -11  -4 596.847 48.0810   1
  -6  11   4 547.747 33.8944   3
   6  11  -4 520.971 41.6508   3
   6  11  -3-0.01575 9.57627   3
   6 -11  -3 7.33604 8.21835   1
   6  11  -3-0.26696 5.50595   2
  -6  11   3 8.85556 7.89515   3
   6  11  -2 535.999 46.2264   2
   6  11  -2 548.398 41.8694   3
   6 -11  -2 460.729 44.0592   1
  -6  11   2 510.684 36.2809   3
   6  11  -1 25.9754 13.0793   2
   6 -11  -1 24.1890 8.50356   1
   6  11  -1 27.0794 8.65716   3
  -6  11   1 35.0504 10.8192   3
   6  11   0 269.582 28.0829   3
   6 -11   0 236.969 32.6302   1
  -6  11   0 229.261 26.3006   3
   6  11   0 231.685 29.5667   2
   6  11   1 15.5373 9.97387   2
   6  11   1 30.6812 11.6964   3
   6 -11   1 16.1852 10.7224   1
  -6  11  -1 26.9578 12.0508   3
   6  11   2 7.00551 8.54069   2
   6 -11   2 14.3359 7.68158   1
  -6  11  -2 11.8130 10.6257   3
   6 -11   3 55.5483 19.0534   1
  -6  11  -3 32.4343 11.8869   3
   6  11   3 26.2157 5.18348   2
   6 -11   4 35.4346 14.7018   1
  -6  11  -4 18.8203 12.3146   3
   6  11   4 44.7151 13.0228   2
   6 -11   5 71.1367 19.8403   1
  -6  11  -5 68.9294 18.5663   3
   6  11   5 61.2675 16.2812   2
   6 -11   6 111.173 23.3824   1
  -6  11  -6 115.064 25.5133   3
   6  11   6 141.020 25.6847   2
   6 -11   7 46.2666 11.0996   1
  -6  11  -7 38.6983 16.6028   3
   6  11   7 57.5157 17.1805   2
   6 -11   8 126.800 23.0466   1
   6  11   8 105.311 26.2849   2
  -6  11  -8 112.818 27.8488   3
   6 -11   9 53.6601 7.66776   1
   6  11   9 74.7195 25.2612   2
  -6  11  -9 54.4251 19.0088   3
   6 -11  10 153.748 29.7731   1
   6  11  10 77.1343 28.4471   2
  -6  11 -10 110.536 27.2697   3
   6 -11  11 28.1725 19.2848   1
   6  11  11 7.28479 12.3361   2
  -6  11 -11 3.52163 13.5677   3
   6  11  12 37.5907 10.0881   2
   6  11  13 16.4117 21.6366   2
   6  12 -13 36.3369 16.4836   3
   6  12 -12 4.32100 7.23982   3
   6  12 -11 221.099 34.1474   3
   6  12 -10 41.2776 13.4431   2
   6  12 -10 23.3050 14.5002   3
   6  12  -9 380.087 41.6393   3
   6  12  -9 370.483 42.3650   2
   6  12  -8 110.776 21.7454   2
   6  12  -8 75.5430 17.7468   3
   6  12  -7 182.826 29.3631   3
   6  12  -7 190.777 31.9647   2
   6  12  -6 11.5786 7.78830   3
   6 -12  -6 27.4054 12.3322   1
   6  12  -6 36.5122 11.4931   2
   6  12  -5 71.9421 15.8626   3
   6  12  -5 64.1525 17.8535   2
   6 -12  -5 79.8203 16.9753   1
   6  12  -4 12.4306 12.4310   3
   6  12  -4 0.10616 6.54578   2
   6 -12  -4-5.30021 9.07327   1
   6 -12  -3-8.07098 5.55037   1
   6  12  -3 5.20570 4.81167   3
  -6  12   3 3.72018 5.15532   3
   6  12  -3-0.25485 9.13233   2
   6  12  -2 26.3416 12.2233   3
   6 -12  -2 11.2572 7.25520   1
   6  12  -2 14.4360 8.35013   2
  -6  12   2 21.0062 4.31193   3
   6 -12  -1 18.9242 9.02716   1
   6  12  -1 24.7322 14.5565   2
   6  12  -1 26.0214 13.0240   3
  -6  12   1 15.3350 8.64057   3
   6 -12   0 49.6926 15.6994   1
   6  12   0 40.3800 11.9424   2
  -6  12   0 42.2010 10.9168   3
   6  12   0 40.9344 11.1295   3
   6 -12   1 221.156 33.2411   1
  -6  12  -1 213.284 27.6255   3
   6  12   1 216.761 30.5570   2
   6  12   1 269.730 27.0082   3
   6  12   2 103.524 22.0663   2
   6 -12   2 97.4549 20.9584   1
  -6  12  -2 70.1187 18.0684   3
   6 -12   3 241.659 33.3142   1
  -6  12  -3 233.215 31.7812   3
   6  12   3 269.540 33.7695   2
   6 -12   4 16.4133 7.34784   1
  -6  12  -4 20.4110 5.89894   3
   6  12   4 43.9507 15.9149   2
   6 -12   5 111.624 22.3188   1
  -6  12  -5 76.0306 19.8042   3
   6  12   5 105.515 23.0854   2
   6 -12   6 0.41119 6.15226   1
  -6  12  -6-9.89220 11.1510   3
   6  12   6-0.64114 6.45465   2
   6 -12   7 16.4960 19.6315   1
  -6  12  -7 0.33648 11.9850   3
   6  12   7-3.04111 9.17480   2
   6 -12   8-9.02223 14.1843   1
   6  12   8 4.86529 5.20084   2
  -6  12  -8 12.2609 9.26087   3
   6 -12   9 1.76023 12.6260   1
   6  12   9 19.6895 15.4236   2
  -6  12  -9 13.3802 9.32691   3
   6  12  10 18.1643 11.6260   2
  -6  12 -10 7.56155 11.8007   3
   6  12  11 99.7368 31.8803   2
   6  12  12 55.2466 7.87242   2
   6  13 -12 32.8897 17.7094   3
   6  13 -11 17.9270 14.3014   3
   6  13 -10 4.25409 3.69033   2
   6  13 -10 7.96143 11.1043   3
   6  13  -9 3.23636 9.93465   3
   6  13  -9 4.04389 12.9948   2
   6  13  -8 2.03264 7.28609   3
   6  13  -8 23.4003 18.1156   2
   6  13  -7 60.5417 14.0400   3
   6  13  -7 57.0541 19.0245   2
   6  13  -6 25.3680 13.5949   3
   6  13  -6 43.0293 17.7559   2
   6  13  -5 185.107 26.7907   3
   6  13  -5 199.774 30.0387   2
   6  13  -4-0.97214 8.23997   3
   6  13  -4 7.45376 12.3682   2
   6 -13  -4 6.05767 12.3086   1
   6 -13  -3 228.021 33.1596   1
   6  13  -3 203.459 30.4854   2
   6  13  -3 231.921 29.8795   3
   6  13  -2 6.15192 10.2016   3
   6  13  -2 7.78971 10.5443   2
   6 -13  -2-0.07762 8.79096   1
   6 -13  -1 157.560 29.4987   1
   6  13  -1 141.776 25.3386   2
   6  13  -1 188.610 25.9602   3
   6  13   0-7.46242 3.21361   3
   6 -13   0 8.69119 11.2350   1
   6  13   0-5.85253 14.0116   2
  -6  13   0 14.2422 9.28437   3
   6  13   1 16.1671 9.87110   2
  -6  13  -1 12.2382 7.90286   3
   6 -13   1 4.91506 7.85285   1
   6 -13   2 15.5433 8.18056   1
   6  13   2 5.03256 5.01440   2
  -6  13  -2 26.5346 12.7036   3
   6 -13   3 8.58041 6.59408   1
   6  13   3-0.71954 4.80690   2
  -6  13  -3 4.30631 7.81506   3
   6  13   4 32.4424 11.0227   2
  -6  13  -4 32.9363 13.4809   3
   6 -13   4 51.8283 20.1006   1
   6 -13   5 73.1061 22.5537   1
  -6  13  -5 81.4826 25.1967   3
   6  13   5 105.957 21.5943   2
  -6  13  -6 48.2776 22.6628   3
   6  13   6 67.3521 18.4061   2
   6 -13   6 67.8952 18.8286   1
  -6  13  -7 143.843 31.6410   3
   6  13   7 156.333 36.4896   2
  -6  13  -8 69.0398 19.0592   3
   6  13   8 43.0321 15.8193   2
   6  13   9 91.0733 23.2932   2
  -6  13  -9 94.5052 24.7668   3
   6  13  10 9.23152 15.7097   2
   6  14 -11 33.8076 16.1557   3
   6  14 -10 298.480 41.0053   3
   6  14  -9 22.9893 14.5513   3
   6  14  -8 290.107 36.0032   3
   6  14  -7 93.0067 24.0448   3
   6  14  -7 83.1111 25.8265   2
   6  14  -6 139.738 27.6327   3
   6  14  -6 123.336 27.2495   2
   6  14  -5 11.7939 10.7089   3
   6  14  -5 3.02050 4.26704   2
   6  14  -4 7.76023 8.77969   3
   6  14  -4 26.4689 13.4421   2
   6  14  -3 2.66692 3.30095   3
   6  14  -3-6.34369 7.89756   2
   6  14  -2 22.9243 12.4773   3
   6  14  -2 10.8588 9.32686   2
   6  14  -1 2.05167 8.04268   2
   6 -14   0 104.078 25.3875   1
   6  14   0 110.622 23.8872   2
   6  14   1 14.0615 9.64340   2
   6 -14   1 28.9173 17.2534   1
   6 -14   2 233.089 39.0671   1
   6  14   2 206.721 31.2687   2
   6  14   3 16.2207 11.3424   2
  -6  14  -3 17.0752 13.0479   3
   6 -14   3 40.1058 17.4729   1
   6  14   4 175.918 30.7264   2
   6 -14   4 225.995 38.4820   1
  -6  14  -4 143.495 28.1363   3
  -6  14  -5-0.33165 7.64090   3
   6  14   5 2.50784 13.5864   2
  -6  14  -6 51.9135 16.1232   3
   6  14   6 74.0725 17.5974   2
  -6  14  -7 2.36475 9.14614   3
   6  14   7 1.88035 20.2968   2
  -6  14  -8-7.34142 18.2252   3
   6  14   8-75.5108 20.8029   2
   6  14   9 97.2171 24.2231   2
   6  15  -9-10.7732 7.70168   3
   6  15  -8 5.19580 6.37028   3
   6  15  -7 30.5183 15.2068   3
   6  15  -6 49.9704 15.1979   3
   6  15  -3 23.4052 7.11374   2
   6  15  -2 36.7555 15.4616   2
   6  15  -1 18.6916 11.7945   2
   6  15   0-1.61790 7.28785   2
   6  15   1-6.45952 12.9175   2
   6  15   2 6.62074 6.55789   2
   6  15   3 26.9874 7.32224   2
   6  15   4 76.9782 14.3749   2
   6  15   5 52.5413 21.5797   2
   6  15   6 100.658 30.4402   2
   7   0 -23-63.2942 18.4213   3
   7   0 -22 0.97910 8.18943   3
   7   0 -21 23.0389 15.4252   3
   7   0 -20 55.2868 17.1235   3
   7   0 -19 7.21366 10.6005   3
   7   0 -18 199.515 28.8372   3
   7   0 -17-4.79833 6.00565   3
   7   0 -16 369.380 37.0139   3
   7   0 -15 0.83298 3.43929   3
   7   0 -15 6.75569 5.91865   2
   7   0 -14 42.7554 9.39274   3
   7   0 -14 45.9659 8.39292   2
   7   0 -13 0.41205 3.38510   3
   7   0 -13-0.18000 2.47755   2
   7   0 -12 12.1043 2.30998   2
   7   0 -12 26.0906 10.2815   3
   7   0 -11 10.6082 8.04241   3
  -7   0  11 16.1567 9.81040   3
   7   0 -11-0.42348 2.73753   2
   7   0 -10 138.008 18.7070   3
   7   0 -10 175.460 15.9936   2
  -7   0  10 182.691 21.4362   3
  -7   0   9 4.00523 5.70561   3
   7   0  -9 3.44003 4.93667   2
   7   0  -9 0.26720 4.16994   3
  -7   0   8 702.334 40.0967   3
   7   0  -8 632.211 30.8370   2
   7   0  -8 616.954 39.4713   3
   7   0  -7 4.47669 5.31563   3
   7   0  -7 3.71262 4.94826   2
  -7   0   7 0.97994 6.89480   3
  -7   0   6 2387.24 76.9641   3
   7   0  -6 2216.52 65.7916   2
   7   0  -6 2235.91 80.1227   3
   7   0  -5-4.16973 6.00574   3
  -7   0   5 1.92471 3.97215   2
  -7   0   5-4.34378 5.74945   3
   7   0  -5-1.52015 2.74763   2
  -7   0   4 2560.90 79.8506   3
  -7   0   4 2654.72 71.2055   2
   7   0  -4 2529.59 79.3371   2
   7   0  -4 2627.61 87.1767   3
  -7   0   3 3.05877 2.04566   3
  -7   0   3-1.56222 2.66222   2
   7   0  -3 1.70792 7.37440   2
   7   0  -2 824.819 46.5094   2
  -7   0   2 849.486 42.6399   3
  -7   0   2 769.657 36.1368   2
  -7   0   1 2.38666 3.38288   2
  -7   0   1-1.69065 5.44509   3
   7   0  -1 7.16810 10.3678   2
  -7   0   0 178.499 19.4337   3
   7   0   0 45.6730 23.7640   2
  -7   0   0 176.647 17.8374   2
   7   0   1 18.2922 13.1567   2
  -7   0  -1-2.89014 5.33735   3
  -7   0  -1-0.10632 3.15294   2
   7   0   2-0.23314 9.08830   2
  -7   0  -2 2.62396 6.32932   2
   7   0   3-2.22240 11.8268   2
  -7   0  -3 0.11529 5.70957   2
  -7   0  -4 563.518 40.0049   2
   7   0   4 427.531 42.0315   2
   7   0   5 2.54800 7.41778   2
   7   0   6 390.886 45.4027   2
   7   0   7 1.80945 5.65889   2
   7   0   8 389.640 43.8502   2
   7   0   9-11.0049 9.60179   2
   7   0  10 10.0010 9.56403   2
   7   0  11-18.6370 16.2295   2
   7   0  12 4.90908 8.67132   2
   7   0  13 7.21895 8.93448   2
   7   0  14 123.728 37.9598   2
   7   0  15 4.87928 8.96587   2
  -7   0 -16 135.645 30.7508   3
  -7   0 -17-4.62012 6.93123   3
  -7   0 -18 250.561 42.0633   3
   7  -1 -23 101.340 24.0313   3
   7   1 -23 97.2425 19.9802   3
   7   1 -22 172.316 28.1082   3
   7  -1 -22 176.974 31.3080   3
   7  -1 -21 141.084 27.5171   3
   7   1 -21 113.468 25.3158   3
   7   1 -20 111.340 21.8007   3
   7  -1 -20 105.912 20.5759   3
   7  -1 -19 72.2472 17.3432   3
   7   1 -19 95.2506 21.3262   3
   7  -1 -18 37.2478 4.00060   2
   7  -1 -18 37.2412 12.6875   3
   7   1 -18 25.5574 8.49138   3
   7  -1 -17 17.1928 8.11795   3
   7   1 -17 28.0242 11.4029   3
   7  -1 -17 26.2973 6.88568   2
   7  -1 -16 16.6357 7.36755   2
   7  -1 -16 10.2775 6.49462   3
   7   1 -16 14.4335 6.29799   3
   7  -1 -15-3.20389 7.43435   3
   7   1 -15 11.0681 9.01361   3
   7  -1 -15 3.68359 5.01207   2
   7  -1 -14 4.53642 7.76927   3
   7   1 -14-1.04198 9.44394   3
   7  -1 -14 3.10113 3.03951   2
   7   1 -13 49.2156 10.7626   2
   7   1 -13 47.1587 10.7921   3
   7  -1 -13 41.9042 12.1227   3
   7  -1 -13 48.5892 7.18979   2
   7   1 -12 61.5584 10.0100   2
   7  -1 -12 60.3236 12.5581   3
   7   1 -12 50.9438 13.0932   3
  -7   1  12 55.0427 9.04846   3
   7  -1 -12 80.0057 9.95472   2
   7   1 -11 261.551 27.4475   3
   7  -1 -11 265.919 26.1757   3
  -7   1  11 283.157 26.9138   3
   7   1 -11 278.859 22.2117   2
   7  -1 -11 297.495 19.0716   2
   7   1 -10 160.477 15.5850   2
   7  -1 -10 126.556 17.8964   3
   7   1 -10 123.903 17.8525   3
  -7   1  10 155.785 18.4931   3
  -7  -1  10 174.674 22.7459   3
   7  -1 -10 153.292 13.5235   2
   7   1  -9 149.788 19.6391   3
   7   1  -9 153.822 16.5063   2
  -7   1   9 159.423 18.9492   3
  -7  -1   9 154.074 19.7484   3
   7  -1  -9 170.712 14.7020   2
   7  -1  -9 152.317 18.7741   3
   7   1  -8 70.2535 14.4337   3
  -7   1   8 77.9083 11.9317   3
  -7  -1   8 89.7223 14.5347   3
   7   1  -8 60.7785 9.51327   2
   7  -1  -8 76.0247 10.0786   2
   7  -1  -8 81.9398 14.6094   3
   7  -1  -7 16.6916 5.17498   3
   7   1  -7 19.3033 7.20932   3
  -7   1   7 26.6374 7.81778   3
  -7  -1   7 19.4681 7.89229   3
   7   1  -7 16.6442 3.12657   2
   7  -1  -7 14.9855 3.35065   2
  -7   1   6 1.15226 2.80161   2
   7  -1  -6-4.85571 7.37592   3
   7   1  -6 2.71029 6.02659   3
  -7   1   6 5.52300 7.20407   3
  -7  -1   6-1.36767 4.56148   3
   7   1  -6 0.42023 2.86672   2
   7  -1  -6-0.38353 2.60040   2
   7   1  -5 275.232 25.5411   3
  -7   1   5 275.948 22.5553   3
  -7  -1   5 291.240 24.6167   3
  -7   1   5 257.724 17.2754   2
   7  -1  -5 189.782 18.7684   2
  -7  -1   5 293.250 21.0877   2
   7   1  -5 296.050 22.2016   2
   7  -1  -5 259.225 24.7770   3
   7   1  -4 80.4710 13.8901   3
  -7  -1   4 89.3188 13.7250   3
  -7   1   4 66.8799 8.99594   2
   7   1  -4 100.923 12.9833   2
   7  -1  -4 67.9596 12.2669   2
  -7  -1   4 82.8464 11.1816   2
  -7   1   4 76.9098 11.5155   3
  -7  -1   3 182.400 19.1917   3
  -7  -1   3 194.763 16.9818   2
   7  -1  -3 203.320 23.4448   2
  -7   1   3 183.369 18.8617   3
   7   1  -3 189.944 19.9309   2
  -7   1   3 250.645 18.6093   2
   7   1  -3 183.764 21.6412   3
   7   1  -2 363.232 28.4824   2
  -7   1   2 321.594 22.0086   2
  -7  -1   2 349.107 25.7360   3
  -7   1   2 340.372 26.4284   3
   7  -1  -2 164.420 27.4250   2
  -7  -1   2 350.387 23.6511   2
   7  -1  -1 685.775 45.9542   2
   7   1  -1 752.834 46.2598   2
  -7   1   1 722.530 35.9576   2
  -7  -1   1 619.671 34.0762   2
  -7   1   1 683.865 38.6954   3
  -7  -1   1 696.502 38.1882   3
   7   1   0 334.056 32.2502   2
  -7   1   0 302.223 24.1388   2
   7  -1   0 257.483 28.5835   2
  -7  -1   0 313.666 24.2374   2
  -7   1   0 281.904 25.2027   3
  -7  -1   0 296.520 24.7135   3
   7   1   1 469.384 41.4427   2
  -7   1  -1 657.069 38.0917   2
  -7  -1  -1 532.769 32.3199   2
   7  -1   1 464.548 40.3381   2
  -7  -1  -1 545.940 35.2322   3
   7   1   2 265.544 35.3682   2
  -7   1  -2 273.797 28.7015   2
  -7  -1  -2 353.589 26.3872   2
   7  -1   2 337.862 34.3761   2
  -7  -1  -2 364.932 28.5357   3
  -7   1  -3 155.685 21.3424   2
   7   1   3 153.099 25.2513   2
  -7  -1  -3 150.426 18.9508   2
   7  -1   3 170.128 27.3261   2
  -7   1  -4 377.199 34.1848   2
  -7  -1  -4 405.991 32.4393   2
   7  -1   4 374.106 38.5766   2
   7   1   4 400.946 40.9083   2
   7   1   5 58.7191 16.4211   2
   7  -1   5 55.0875 16.4007   2
   7   1   6 7.39497 8.97923   2
   7  -1   6 7.66910 12.4173   2
   7   1   7 8.31952 6.62529   2
   7  -1   7-0.82878 6.51241   2
   7  -1   8 78.8120 19.6595   2
   7   1   8 87.7852 21.5525   2
   7   1   9 200.144 35.7510   2
   7  -1   9 185.168 31.5491   2
   7   1  10 148.301 31.4256   2
   7  -1  10 147.320 27.9801   2
   7  -1  11 462.134 55.2856   2
   7   1  11 412.996 49.3346   2
   7  -1  12 158.076 33.9916   2
   7   1  12 104.306 27.1783   2
   7  -1  13 240.144 44.1858   2
   7   1  13 233.814 38.6857   2
   7  -1  14 126.044 35.7140   2
   7   1  14 122.780 38.5880   2
   7   1  15 46.0070 23.1856   2
  -7   1 -16 59.1567 24.5094   3
  -7  -1 -16 44.8445 14.4808   3
   7   1  16 53.6449 31.1625   2
  -7   1 -17-7.65126 14.0659   3
  -7  -1 -17 7.81577 9.08496   3
  -7  -1 -18-5.62597 6.64216   3
   7  -2 -22-4.40848 14.8719   3
   7   2 -22-2.33867 11.0199   3
   7  -2 -21 28.8308 11.3068   3
   7   2 -21 2.43648 5.81305   3
   7   2 -20 5.31225 13.8387   3
   7  -2 -20-0.64632 5.30446   3
   7  -2 -19 170.284 25.6675   3
   7   2 -19 171.739 30.7486   3
   7  -2 -18 14.3473 12.7809   3
   7   2 -18 20.3172 12.6091   3
   7  -2 -17 351.180 35.8215   3
   7   2 -17 345.150 39.4902   3
   7  -2 -16-0.97940 8.42993   3
   7   2 -16 19.1500 12.1727   3
   7  -2 -16 16.9323 4.18556   2
   7  -2 -15 558.789 25.2716   2
   7   2 -15 485.672 43.4536   3
   7  -2 -15 505.923 36.7715   2
   7  -2 -15 482.093 38.2179   3
   7  -2 -14 21.1484 9.25770   3
   7   2 -14 16.9680 7.66826   3
   7  -2 -14 26.7282 5.88349   2
   7  -2 -13 129.788 17.1712   3
   7   2 -13 139.440 21.1193   3
  -7   2  13 164.888 21.6900   3
   7  -2 -13 171.213 12.7043   2
   7   2 -12 1.64787 4.83803   2
   7  -2 -12 10.2578 5.06010   3
   7   2 -12 11.3108 9.25579   3
  -7   2  12 9.13821 4.48318   3
   7  -2 -12 9.35803 10.0844   2
   7  -2 -11-1.90463 5.37700   3
   7   2 -11-7.06615 3.62075   3
  -7   2  11 6.61845 5.12996   3
   7  -2 -11-4.33114 4.27630   2
   7   2 -11-0.39021 4.93993   2
   7  -2 -10 38.5685 8.76980   3
   7   2 -10 48.3641 10.9227   3
  -7   2  10 35.4685 8.40364   3
   7   2 -10 39.3740 8.76830   2
   7  -2 -10 43.4516 6.92996   2
  -7   2   9 232.897 21.8285   3
  -7  -2   9 199.401 23.1370   3
   7   2  -9 227.543 20.0669   2
   7  -2  -9 267.669 16.8659   2
   7  -2  -9 224.007 23.7663   3
   7   2  -9 199.555 23.4881   3
   7  -2  -8 16.2472 5.09307   3
   7   2  -8 11.7528 7.29300   3
  -7   2   8 9.22571 5.32445   3
  -7  -2   8 31.8805 10.2140   3
   7   2  -8 15.2388 3.66749   2
   7  -2  -8 22.6167 7.33552   2
   7   2  -7 478.092 29.8930   2
  -7   2   7 458.464 30.1072   3
  -7  -2   7 449.442 32.9871   3
   7  -2  -7 437.842 25.5367   2
   7   2  -7 416.913 32.6986   3
   7  -2  -7 453.093 32.6040   3
   7   2  -6 74.6518 13.1606   3
   7  -2  -6 100.350 15.8776   2
  -7   2   6 73.4368 10.5315   3
  -7  -2   6 105.557 15.6221   3
  -7   2   6 83.7693 9.31308   2
   7   2  -6 74.1786 11.0117   2
   7  -2  -6 84.9608 14.0334   3
  -7   2   5 1775.63 61.4654   3
  -7   2   5 1788.21 50.6379   2
  -7  -2   5 1860.70 67.5788   3
[truncated: 209,354 more chars]
