# Supplementary material
Source: MDPI journal article supplement (https://www.mdpi.com/2304-6740/10/4/41)
Supplement: s1 [file s1 › ESI_INORGANICS_revized.pdf]

# INORGANICS

## Electronic Supplementary Information

*Article*

### **Cyano-bridged Dy(III) and Ho(III) complexes with square-wave structure of the chains**

**Valentina D. Sasnovskaya <sup>1</sup>, Leokadiya V. Zorina <sup>2\*</sup>, Sergey V. Simonov <sup>2</sup>, Artem D. Talantsev <sup>1</sup> and Eduard B. Yagubskii <sup>1\*</sup>**

<sup>1</sup> Institute of Problems of Chemical Physics, IPCP RAS, Chernogolovka 142432, Russia; sasnovskayavd@rambler.ru (V.D.S.); artgtx32@mail.ru (A.D.T.);

<sup>2</sup> Institute of Solid State Physics, ISSP RAS, Chernogolovka 142432, Russia; simonov@issp.ac.ru (S.V.S.)

\* Correspondence: zorina@issp.ac.ru (L.V.Z.); yagubski@gmail.com (E.B.Y.)

**Table S1.** *SHAPE*<sup>\*</sup> analysis.

| Complex      | Polyhedra [ML9] |                |          |         |         |       |              |
|--------------|-----------------|----------------|----------|---------|---------|-------|--------------|
|              | EP-9            | OPY-9          | HBPY-9   | JTC-9   | JCCU-9  | CCU-9 |              |
| DyCr (1)     | 31.792          | 23.894         | 17.057   | 14.958  | 7.933   | 6.846 |              |
| DyFe (2)     | 31.867          | 23.816         | 17.270   | 14.612  | 8.077   | 7.029 |              |
| HoCr (3)     | 31.927          | 23.935         | 17.080   | 14.956  | 7.994   | 6.899 |              |
| HoFe (4)     | 31.877          | 23.752         | 17.382   | 14.747  | 8.292   | 7.227 |              |
| Dy [ref. 19] | 32.388          | 23.609         | 16.548   | 15.736  | 7.880   | 6.716 |              |
| Ho [ref. 19] | 32.527          | 23.615         | 16.593   | 15.750  | 7.913   | 6.751 |              |
|              |                 |                |          |         |         |       |              |
|              | JCSAPR-9        | <b>CSAPR-9</b> | JTCTPR-9 | TCTPR-9 | JTDIC-9 | HH-9  | MFF-9        |
| DyCr (1)     | 2.771           | <b>1.986</b>   | 2.473    | 2.040   | 12.687  | 7.861 | 2.152        |
| DyFe (2)     | 2.655           | <b>1.861</b>   | 2.377    | 1.933   | 12.915  | 8.222 | 2.118        |
| HoCr (3)     | 2.717           | <b>1.937</b>   | 2.435    | 1.974   | 12.764  | 7.942 | 2.119        |
| HoFe (4)     | 2.607           | <b>1.808</b>   | 2.366    | 1.919   | 12.839  | 8.261 | 2.068        |
| Dy [ref. 19] | 2.342           | 1.470          | 3.009    | 2.475   | 11.924  | 8.343 | <b>1.417</b> |
| Ho [ref. 19] | 2.290           | 1.419          | 2.997    | 2.439   | 11.931  | 8.423 | <b>1.370</b> |

EP-9 – Enneagon ( $D_{9h}$ ); OPY-9 - Octagonal pyramid ( $C_{8v}$ ); HBPY-9 - Heptagonal bipyramid ( $D_{7h}$ ); JTC-9 - Johnson triangular cupola ( $C_{3v}$ ); JCCU-9 - Capped cube ( $C_{4v}$ ); CCU-9 - Spherical-relaxed capped cube ( $C_{4v}$ ); JCSAPR-9 - Capped square antiprism ( $C_{4v}$ ); **CSAPR-9** - **Spherical capped square antiprism** ( $C_{4v}$ ); JTCTPR-9 - Tricapped trigonal prism ( $D_{3h}$ ); TCTPR-9 - Spherical tricapped trigonal prism ( $D_{3h}$ ); JTDIC-9 - Tridiminished icosahedron ( $C_{3v}$ ); HH-9 - Hula-hoop ( $C_{2v}$ ); **MFF-9** - **Muffin** ( $C_s$ )

\* [M. Llunell, D. Casanova, J. Cirera, P. Alemany, S. Alvarez, ‘SHAPE: Program for the Stereochemical Analysis of Molecular Fragments by Means of Continuous Shape Measures and Associated Tools’, Version 2.1, 2013, Barcelona]

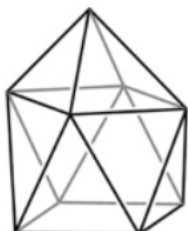Capped square antiprism ( $C_{4v}$ )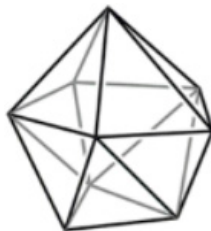Muffin ( $C_s$ )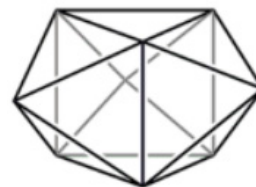Tricapped trigonal prism ( $D_{3h}$ )

**Table S2.** Hydrogen bond geometry in DyCr complex **1**.

| D  | H    | A   | Symmetry<br>code for A | D-H, Å  | H...A, Å | D...A, Å   | D-H...A, ° |
|----|------|-----|------------------------|---------|----------|------------|------------|
| O3 | H3wa | N14 | x, y+1, z              | 0.76(2) | 1.97(2)  | 2.722(2)   | 170(2)     |
| O3 | H3wb | N15 | 2-x, y+1/2, 1/2-z      | 0.76(2) | 2.09(2)  | 2.843(2)   | 170(2)     |
| O4 | H4wa | O5  | x, y, z                | 0.77(1) | 1.98(1)  | 2.754 (2)  | 175(2)     |
| O4 | H4wb | O5  | -x+1, -y+1, -z         | 0.80(1) | 2.07(1)  | 2.859(2)   | 171(2)     |
| N1 | H1a  | O6  | -x+2, -y+1, -z         | 0.86(2) | 2.12(2)  | 2.944(2)   | 161(2)     |
| N1 | H1b  | O6  | x, y, z                | 0.83(2) | 2.15(2)  | 2.954(2)   | 162(2)     |
| N2 | H2a  | N16 | -x+1, -y+1, -z         | 0.85(2) | 2.17(2)  | 3.007(2)   | 167(2)     |
| N3 | H3   | N14 | 2-x, y+1/2, 1/2-z      | 0.80(2) | 2.64(2)  | 3.380(2)   | 154(2)     |
| O5 | H5wa | N16 | -x+1, -y+1, -z         | 0.79(1) | 2.24(1)  | 3.037(2)   | 178(2)     |
| O5 | H5wb | N17 | 1-x, y+1/2, 1/2-z      | 0.78(1) | 2.36(2)  | 3.098(2)   | 158(2)     |
| O6 | H6wa | O7  | x, -y+1/2, z-1/2       | 0.80(1) | 1.99(2)  | 2.767(2)   | 164(3)     |
| O6 | H6wb | N14 | 2-x, y+1/2, 1/2-z      | 0.78(1) | 2.32(2)  | 3.061(2)   | 158(3)     |
| O7 | H7wa | N17 | x, y, z                | 0.79(1) | 2.13(2)  | 2.914(2)   | 170(3)     |
| O7 | H7wb | N15 | x, -y+1/2, z-1/2       | 0.77(1) | 2.15(2)  | 2.915(2)   | 171(3)     |
| C3 | H3b  | O7  | x, y, z                | 0.98    | 2.61     | 3.462(2)   | 145.4      |
| C6 | H6   | O7  | x, y, z                | 0.95    | 2.63     | 3.584(2)   | 177.7      |
| C8 | H8   | O2  | x, -y+3/2, z+1/2       | 0.95    | 2.61     | 3.5339(18) | 163.6      |

**Table S3.** Hydrogen bond geometry in DyFe complex **2**.

| D  | H    | A   | Symmetry<br>code for A | D-H, Å  | H...A, Å | D...A, Å  | D-H...A, ° |
|----|------|-----|------------------------|---------|----------|-----------|------------|
| O3 | H3wa | N14 | x, y+1, z              | 0.77(3) | 2.03(6)  | 2.743(9)  | 153(11)    |
| O3 | H3wb | N15 | 2-x, y+1/2, 1/2-z      | 0.78(3) | 2.09(4)  | 2.864(9)  | 176(10)    |
| O4 | H4wa | O5  | x, y, z                | 0.78(3) | 1.97(4)  | 2.728(8)  | 164(10)    |
| O4 | H4wb | O5  | -x+1, -y+1, -z         | 0.78(3) | 2.10(4)  | 2.866(10) | 166(10)    |
| N1 | H1a  | O6  | -x+2, -y+1, -z         | 0.79(4) | 2.22(6)  | 2.928(11) | 149(10)    |
| N1 | H1b  | O6  | x, y, z                | 0.79(4) | 2.22(6)  | 2.923(10) | 148(10)    |
| N2 | H2a  | N16 | -x+1, -y+1, -z         | 0.79(4) | 2.28(4)  | 3.060(12) | 177(10)    |
| N3 | H3   | N14 | 2-x, y+1/2, 1/2-z      | 0.78(4) | 2.64(5)  | 3.365(10) | 155(9)     |
| N4 | H4   | N12 | 1-x, y+1/2, 1/2-z      | 0.78(4) | 2.63(7)  | 3.230(9)  | 134(8)     |
| N4 | H4   | N13 | 1-x, y+1/2, 1/2-z      | 0.78(4) | 2.60(6)  | 3.311(10) | 151(8)     |
| O5 | H5wa | N16 | -x+1, -y+1, -z         | 0.78(3) | 2.21(4)  | 2.988(10) | 175(10)    |
| O5 | H5wb | N17 | 1-x, y+1/2, 1/2-z      | 0.78(3) | 2.42(8)  | 3.058(11) | 140(11)    |
| O6 | H6wa | O7  | x, -y+1/2, z-1/2       | 0.78(3) | 2.00(5)  | 2.756(11) | 163(12)    |
| O6 | H6wb | N14 | 2-x, y+1/2, 1/2-z      | 0.78(3) | 2.32(6)  | 3.044(12) | 154(12)    |
| O7 | H7wa | N17 | x, y, z                | 0.78(4) | 2.21(6)  | 2.938(11) | 157(12)    |
| O7 | H7wb | N15 | x, -y+1/2, z-1/2       | 0.78(4) | 2.14(4)  | 2.911(12) | 172(12)    |
| C3 | H3b  | O7  | x, y, z                | 0.98    | 2.57     | 3.440(12) | 147.3      |
| C6 | H6   | O7  | x, y, z                | 0.95    | 2.55     | 3.500(12) | 178.0      |
| C8 | H8   | O2  | x, -y+3/2, z+1/2       | 0.95    | 2.54     | 3.464(11) | 163.7      |

**Table S4.** Hydrogen bond geometry in HoCr complex **3**.

| D  | H    | A   | Symmetry<br>code for A | D-H, Å  | H...A, Å  | D...A, Å | D-H...A, ° |
|----|------|-----|------------------------|---------|-----------|----------|------------|
| O3 | H3wa | N14 | x, y+1, z              | 0.80(2) | 1.932(15) | 2.729(2) | 173(3)     |
| O3 | H3wb | N15 | 2-x, y+1/2, 1/2-z      | 0.79(2) | 2.069(16) | 2.846(2) | 167(3)     |
| O4 | H4wa | O5  | x, y, z                | 0.78(2) | 1.978(15) | 2.760(2) | 176(3)     |
| O4 | H4wb | O5  | -x+1, -y+1, -z         | 0.79(2) | 2.084(15) | 2.875(2) | 174(3)     |
| N1 | H1a  | O6  | -x+2, -y+1, -z         | 0.83(3) | 2.13(3)   | 2.941(3) | 165(3)     |
| N1 | H1b  | O6  | x, y, z                | 0.85(3) | 2.15(3)   | 2.963(3) | 160(3)     |
| N2 | H2a  | N16 | -x+1, -y+1, -z         | 0.80(3) | 2.21(3)   | 3.002(3) | 169(3)     |
| N3 | H3   | N14 | 2-x, y+1/2, 1/2-z      | 0.84(2) | 2.64(3)   | 3.389(3) | 149(2)     |
| N4 | H4   | N12 | 1-x, y+1/2, 1/2-z      | 0.86(3) | 2.66(3)   | 3.332(2) | 137(2)     |
| O5 | H5wa | N16 | -x+1, -y+1, -z         | 0.80(2) | 2.249(16) | 3.045(3) | 176(3)     |
| O5 | H5wb | N17 | 1-x, y+1/2, 1/2-z      | 0.79(2) | 2.351(18) | 3.105(3) | 160(3)     |
| O6 | H6wa | O7  | x, -y+1/2, z-1/2       | 0.80(2) | 2.010(19) | 2.772(3) | 158(3)     |
| O6 | H6wb | N14 | 2-x, y+1/2, 1/2-z      | 0.80(2) | 2.294(19) | 3.063(3) | 163(4)     |
| O7 | H7wa | N17 | x, y, z                | 0.81(2) | 2.109(17) | 2.910(3) | 170(3)     |
| O7 | H7wb | N15 | x, -y+1/2, z-1/2       | 0.80(2) | 2.124(17) | 2.921(3) | 171(3)     |
| C3 | H3b  | O7  | x, y, z                | 0.98    | 2.61      | 3.465(3) | 145.2      |
| C6 | H6   | O7  | x, y, z                | 0.95    | 2.63      | 3.583(3) | 177.2      |
| C8 | H8   | O2  | x, -y+3/2, z+1/2       | 0.95    | 2.62      | 3.538(2) | 163.9      |

**Table S5.** Hydrogen bond geometry in HoFe complex **4**.

| D  | H    | A   | Symmetry<br>code for A | D-H, Å  | H...A, Å | D...A, Å  | D-H...A, ° |
|----|------|-----|------------------------|---------|----------|-----------|------------|
| O3 | H3wa | N14 | x, y+1, z              | 0.83(2) | 1.93(3)  | 2.742(6)  | 166(6)     |
| O3 | H3wb | N15 | 2-x, y+1/2, 1/2-z      | 0.82(2) | 2.12(3)  | 2.904(7)  | 159(6)     |
| O4 | H4wa | O5  | x, y, z                | 0.80    | 1.99     | 2.784(6)  | 170.6      |
| O4 | H4wb | O5  | -x+1, -y+1, -z         | 0.82(2) | 2.06(2)  | 2.868(5)  | 169(6)     |
| N1 | H1a  | O6  | -x+2, -y+1, -z         | 0.87(3) | 2.19(5)  | 2.977(9)  | 151(8)     |
| N1 | H1b  | O6  | x, y, z                | 0.87(3) | 2.15(4)  | 2.966(10) | 155(7)     |
| N2 | H2a  | N16 | -x+1, -y+1, -z         | 0.86(3) | 2.30(4)  | 3.110(8)  | 157(6)     |
| N3 | H3   | N14 | 2-x, y+1/2, 1/2-z      | 0.88(4) | 2.62(5)  | 3.373(8)  | 144(5)     |
| N4 | H4   | N12 | 1-x, y+1/2, 1/2-z      | 0.85(4) | 2.46(4)  | 3.252(6)  | 154(5)     |
| O5 | H5wa | N16 | -x+1, -y+1, -z         | 0.82(2) | 2.24(3)  | 3.038(7)  | 163(8)     |
| O5 | H5wb | N17 | 1-x, y+1/2, 1/2-z      | 0.82(2) | 2.30(4)  | 3.040(7)  | 150(5)     |
| O6 | H6wa | O7  | x, -y+1/2, z-1/2       | 0.82(2) | 1.99(4)  | 2.785(10) | 165(10)    |
| O6 | H6wb | N14 | 2-x, y+1/2, 1/2-z      | 0.82(2) | 2.30(3)  | 3.102(9)  | 167(11)    |
| O7 | H7wa | N17 | x, y, z                | 0.82(2) | 2.16(3)  | 2.973(9)  | 171(8)     |
| O7 | H7wb | N15 | x, -y+1/2, z-1/2       | 0.83(2) | 2.12(3)  | 2.911(8)  | 160(9)     |
| C6 | H6   | O7  | x, y, z                | 0.93    | 2.64     | 3.565(9)  | 179.0      |
| C8 | H8   | O2  | x, -y+3/2, z+1/2       | 0.93    | 2.62     | 3.506(7)  | 160.5      |

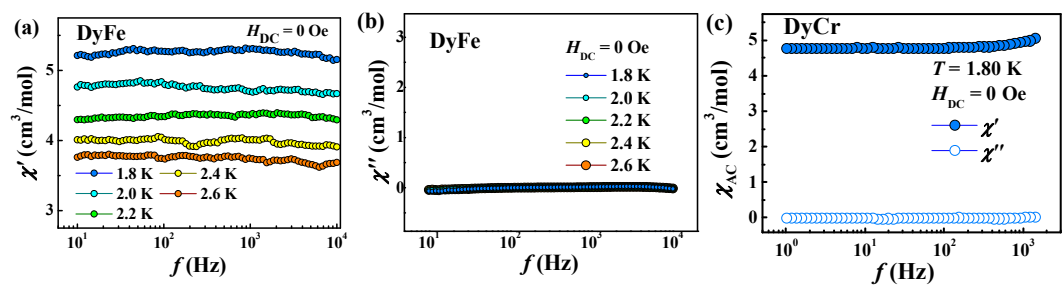

**Figure S1.** Real and imaginary parts of ac magnetic susceptibility for the **1** (DyCr) and **2** (DyFe) complexes, measured without an externally applied magnetic field.

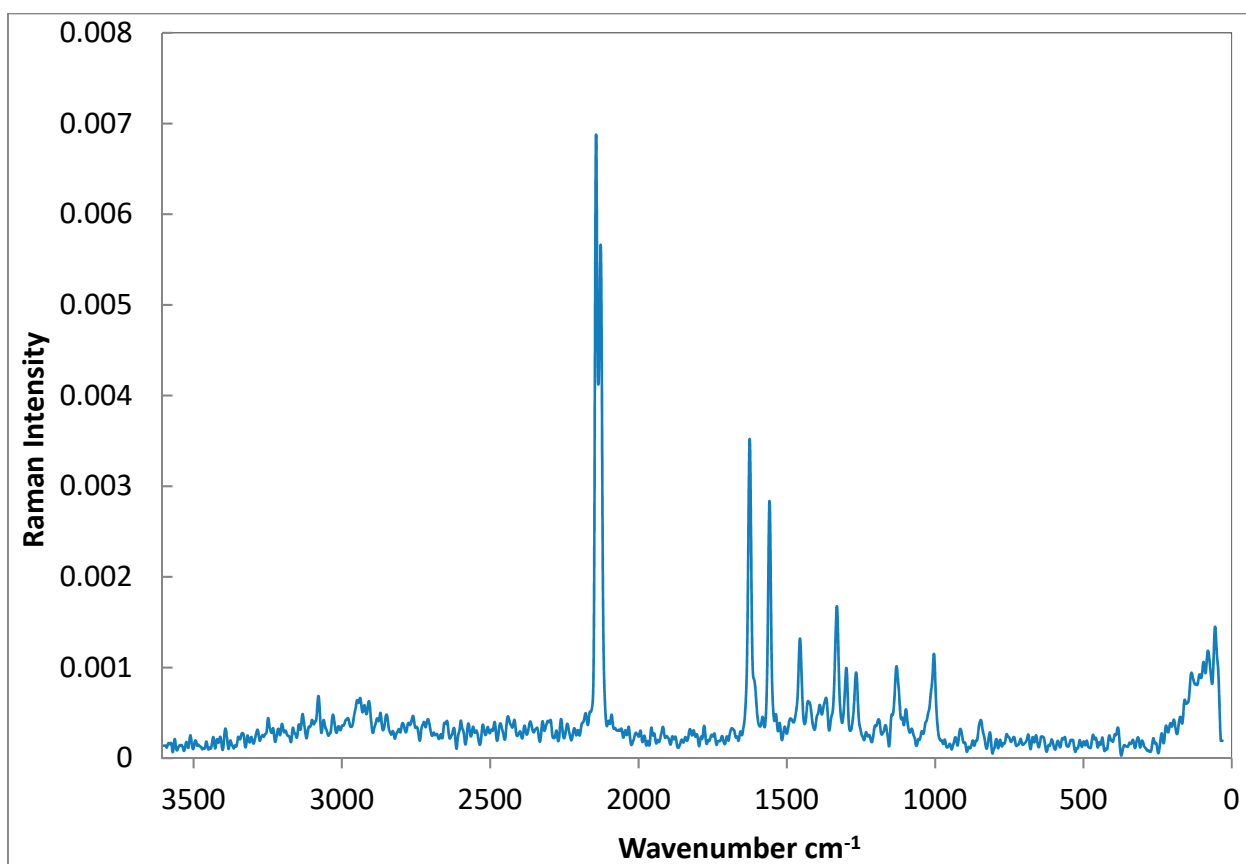

**Figure S2.** Raman spectrum of the complex **2** (DyFe).

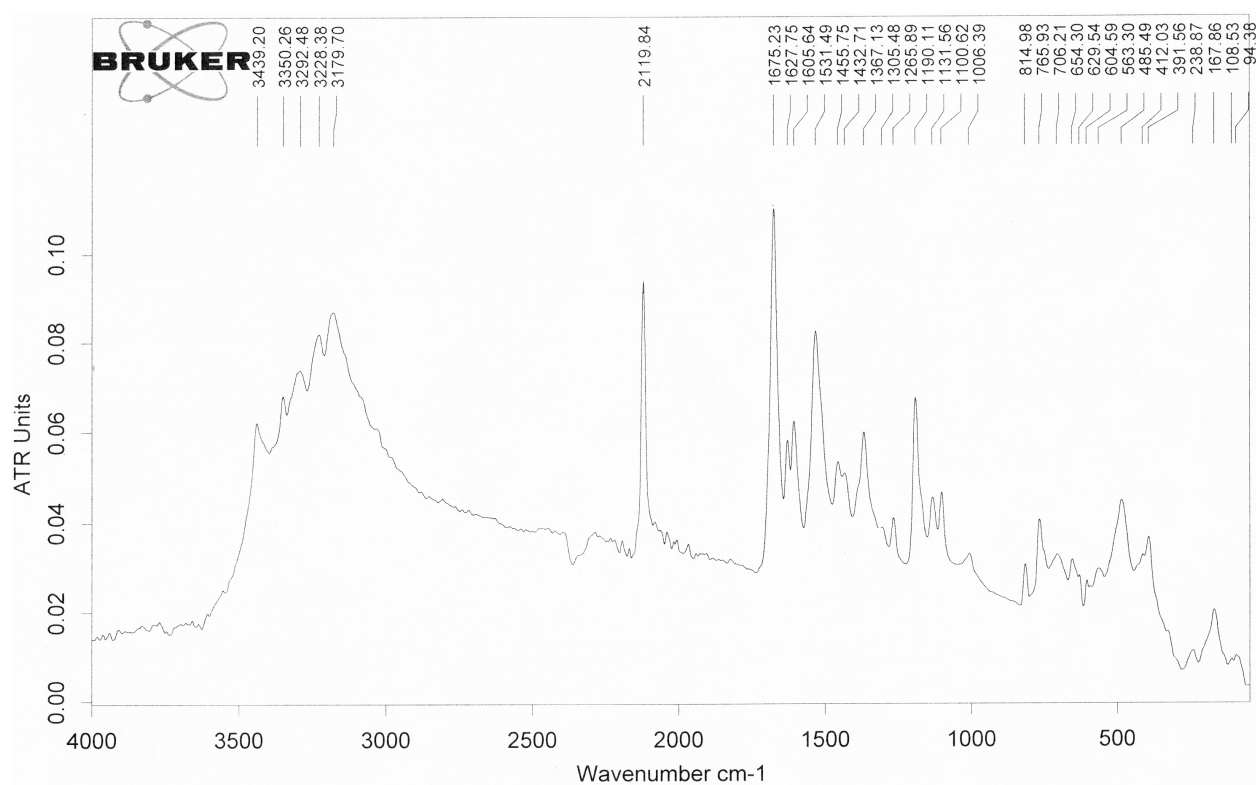

**Figure S3.** IR spectrum of the complex **2** (DyFe).

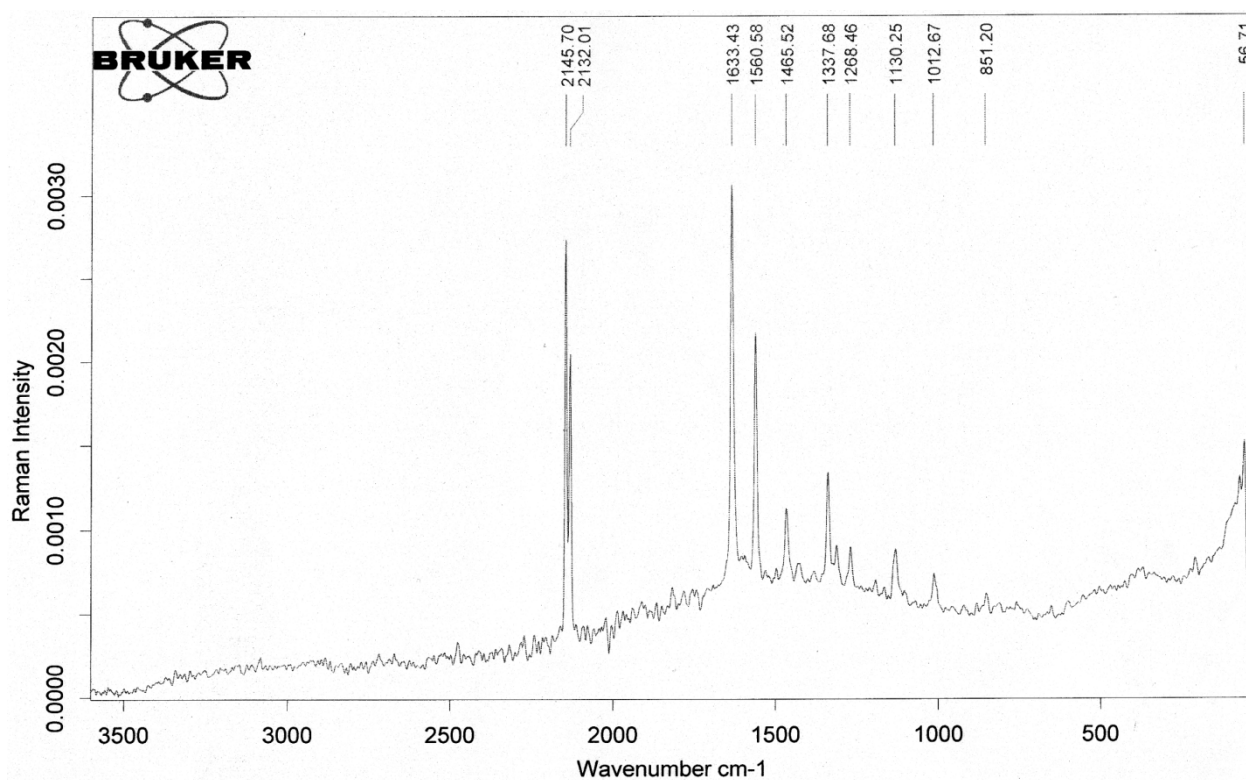

**Figure S4.** Raman spectrum of the complex **3** (HoCr).

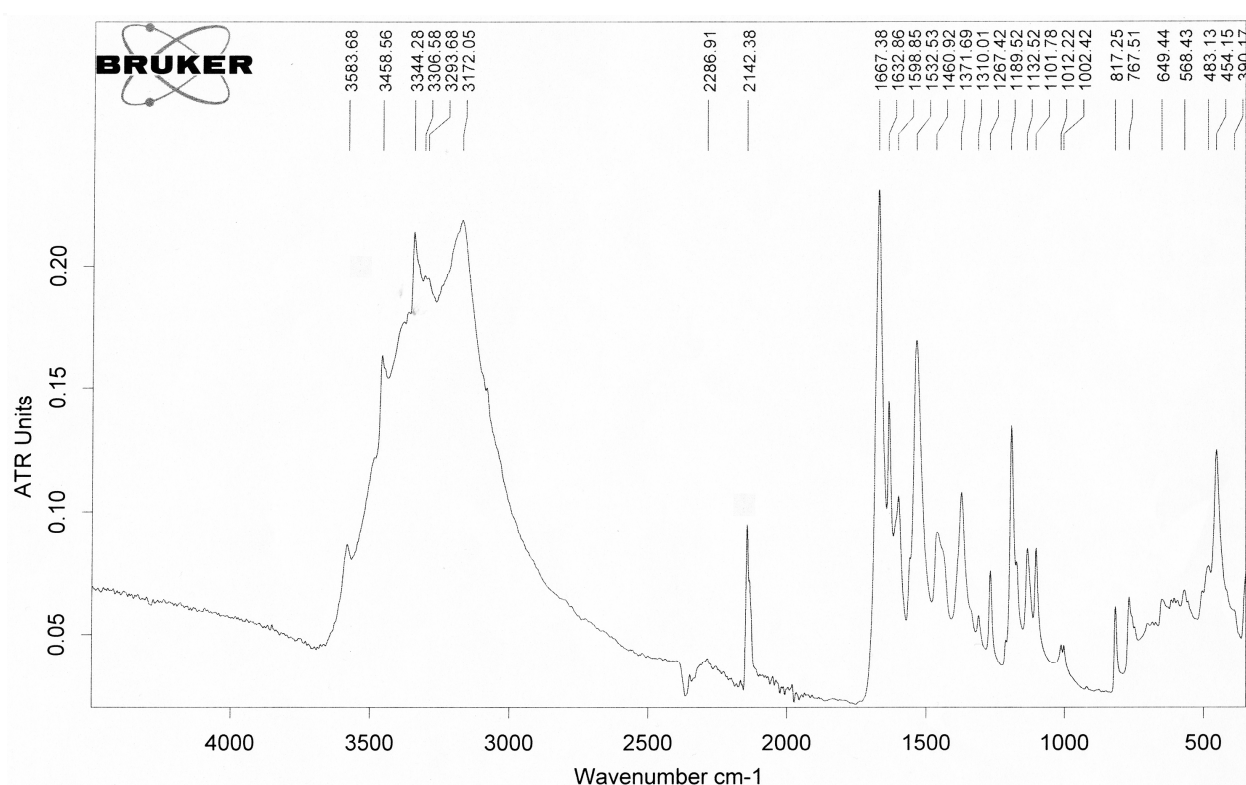

**Figure S5.** IR spectrum of the complex **3** (HoCr).

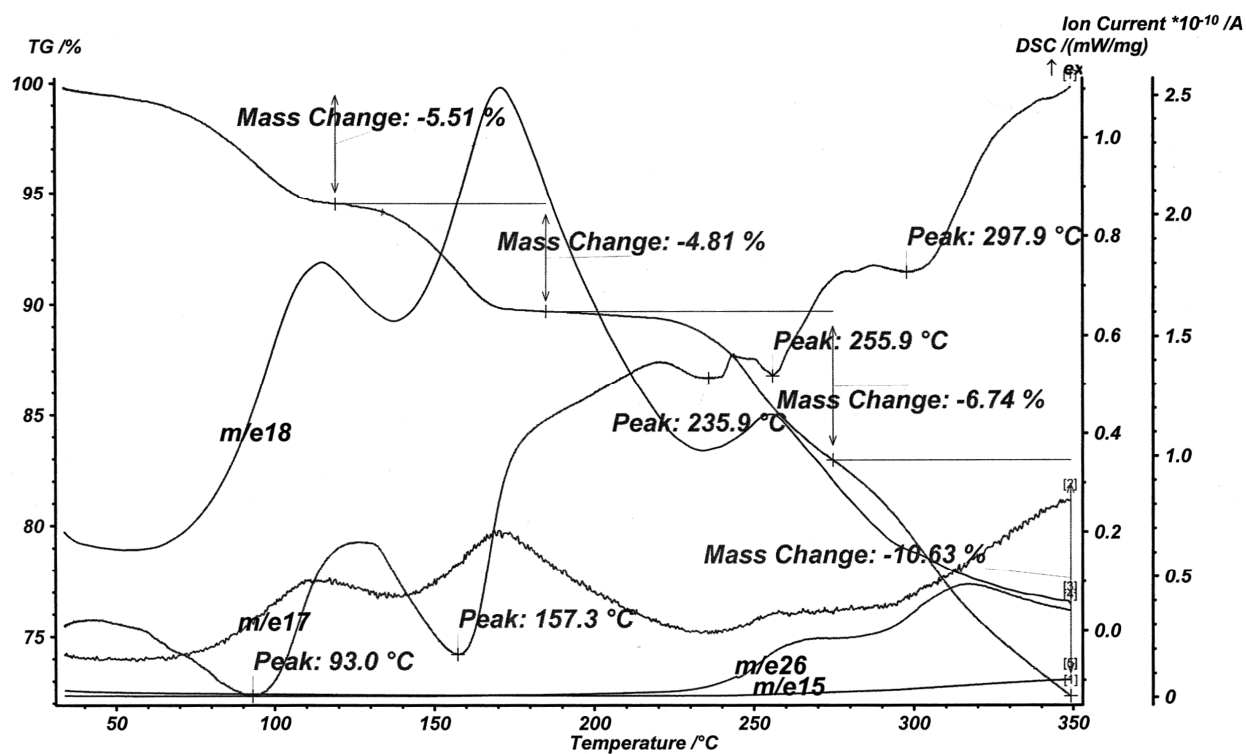

Figure S6. TG-DSC curves and mass spectra for complex 3 (HoCr) after drying in vacuum.

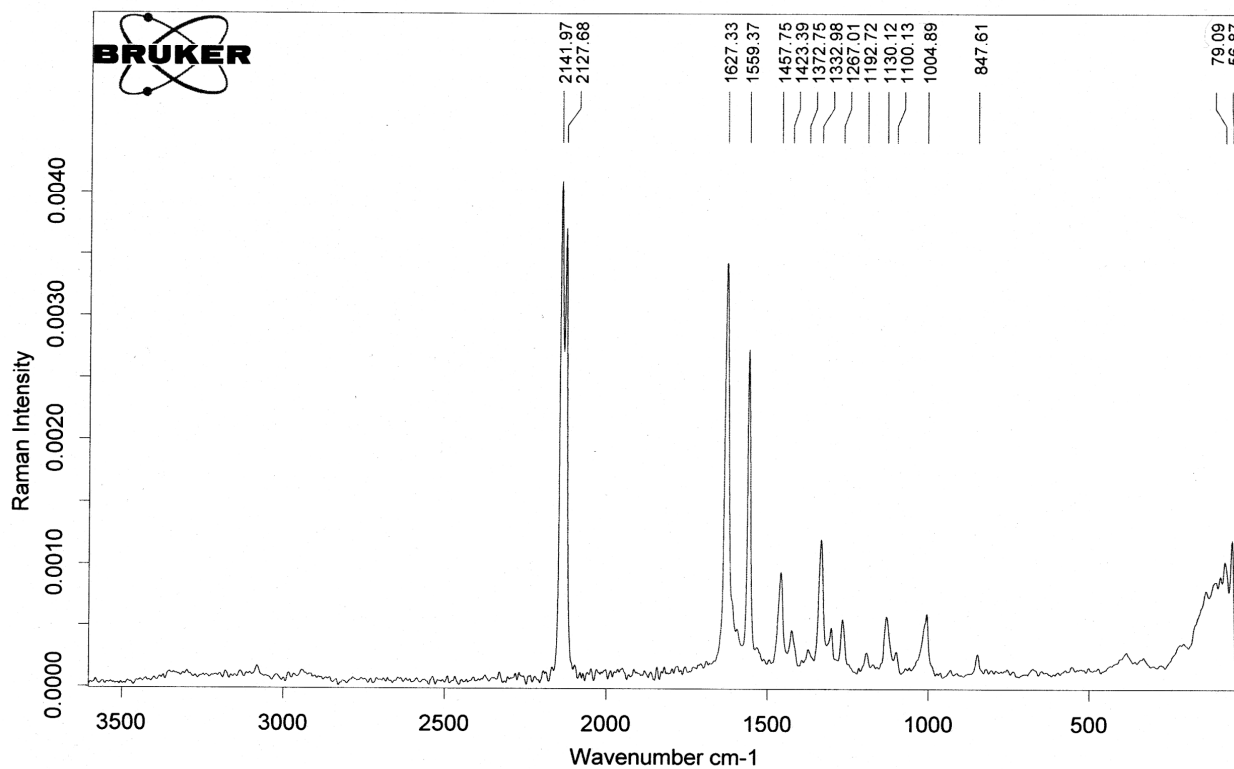

Figure S7. Raman spectrum of the complex 4 (HoFe).

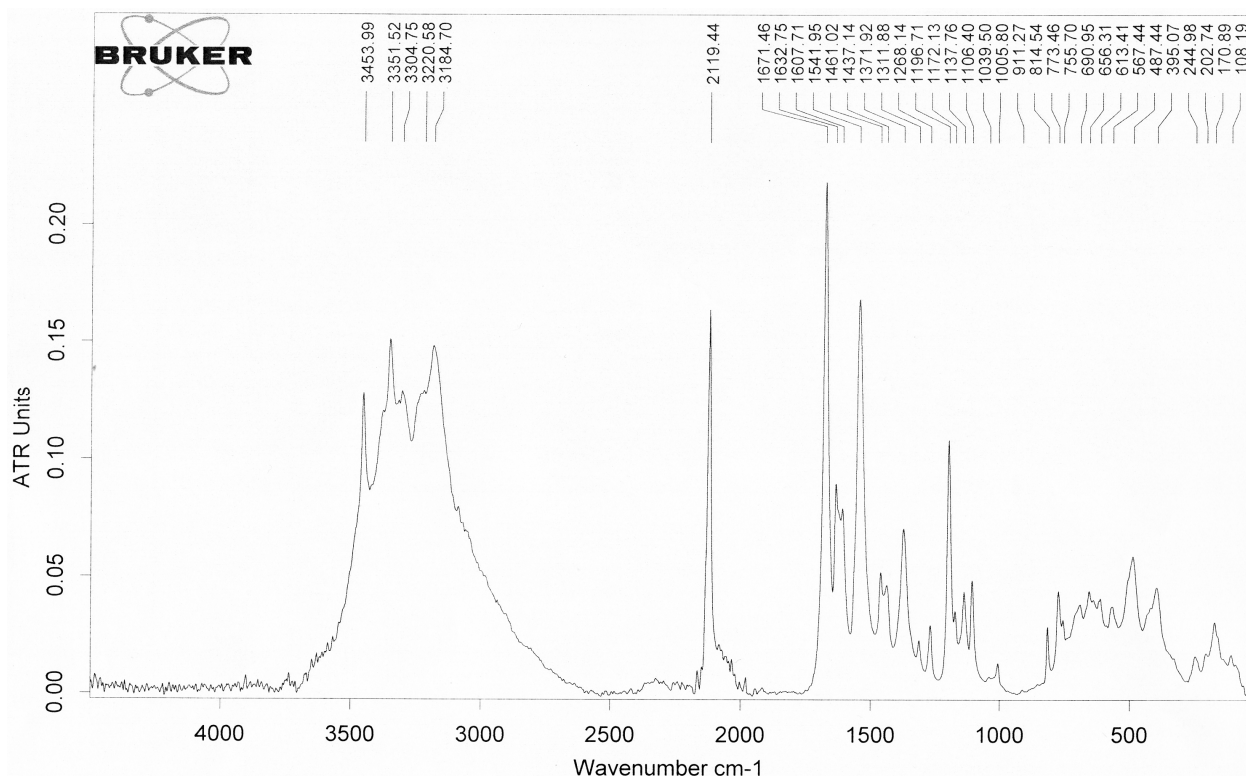

**Figure S8.** IR spectrum of the complex 4 (HoFe).

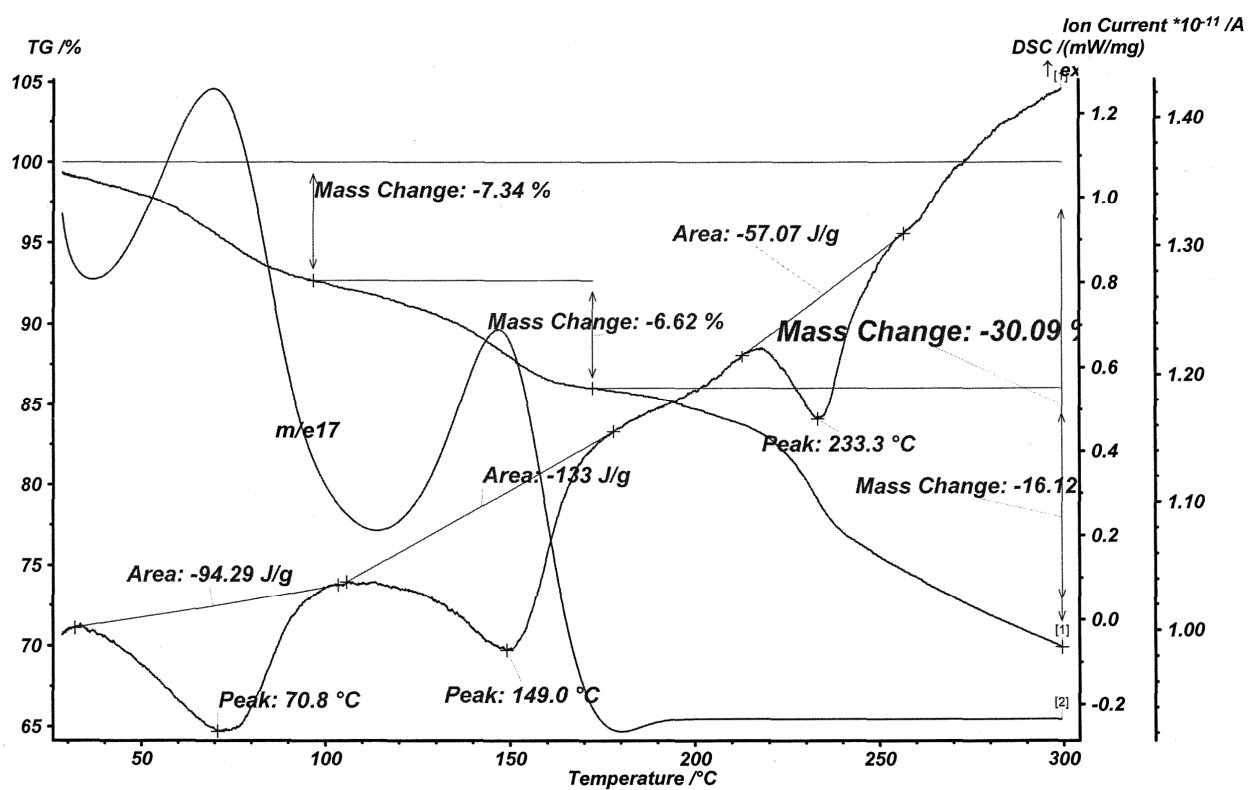

**Figure S9.** TG-DSC curves and mass spectra for complex 4 (HoFe) after drying in vacuum.
